# Supplementary material for: Genome-Wide Identification and Characterization of Long Noncoding RNAs Involved in Chinese Wheat Mosaic Virus Infection of Nicotiana benthamiana
Source: MDPI journal article supplement (doi:10.3390/biology10030232), 2021-03-17
Supplement: s1 [file s1]

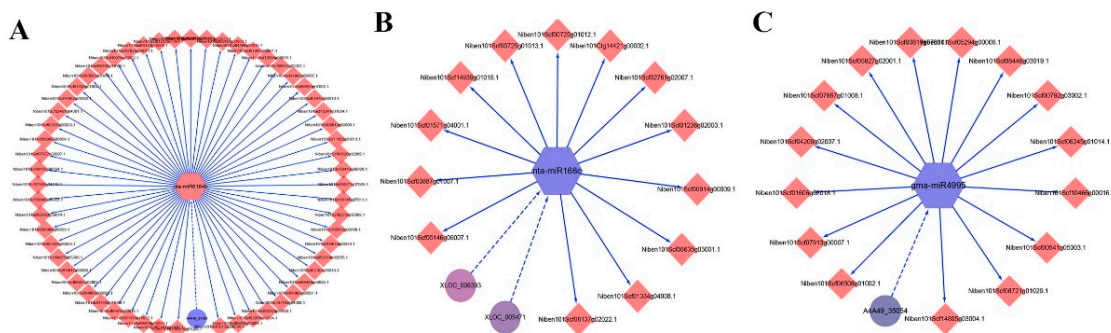

**Figure S1.** The interaction network among lncRNAs, miRNAs and miRNA target protein-coding genes.

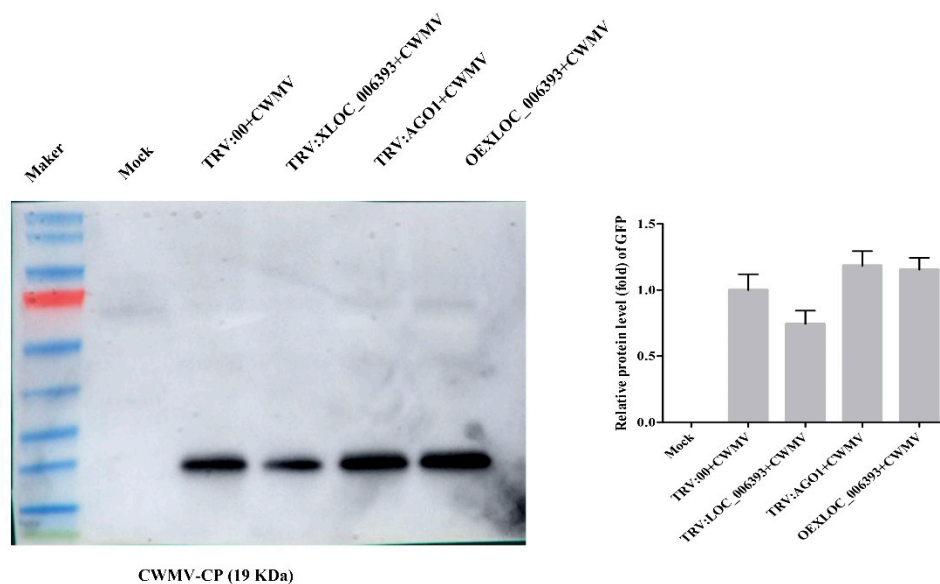

**Figure S2.** Full Western blotting image for Figure 5C—Anti-CWMV CP.

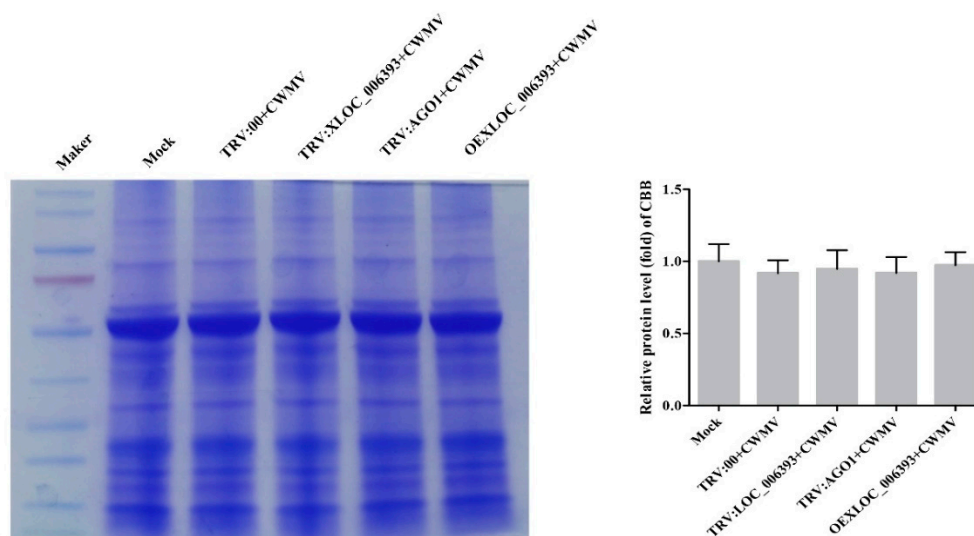

**Figure S3.** Full Western blotting image for Figure 5C—CBB.

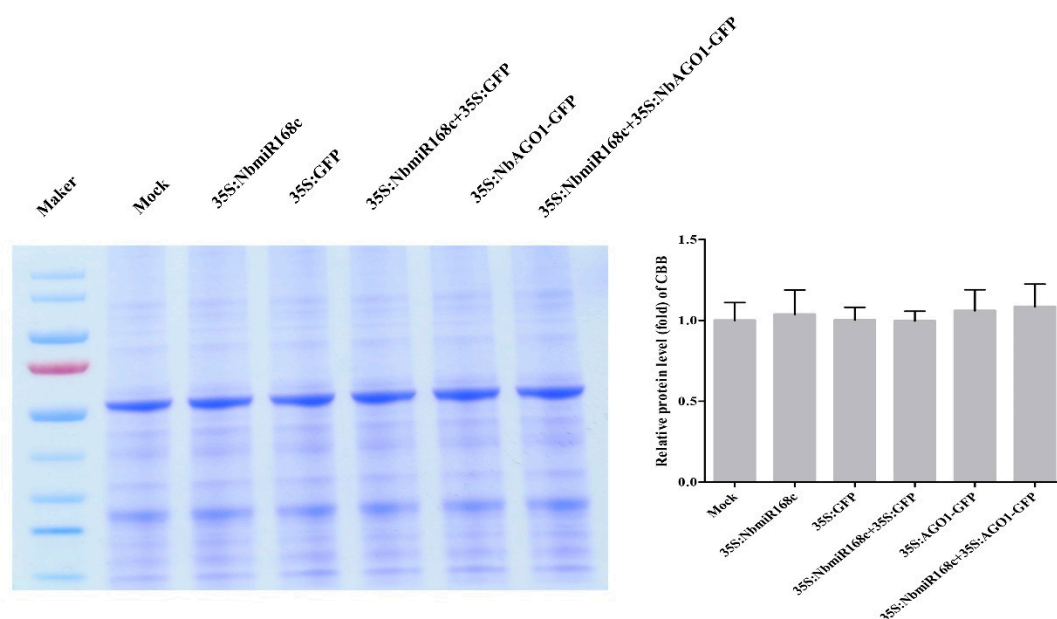

Figure S4. Full Western blotting image for Figure 6E—CBB.

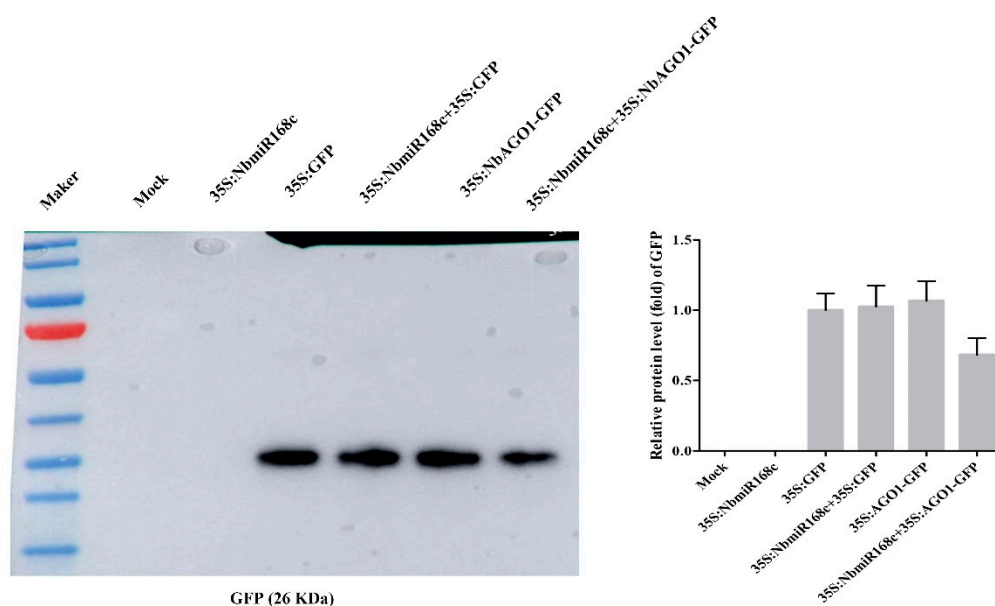

Figure S5. Full Western blotting image for Figure 6E—Anti-GFP.

Table S1. Primers used in this study.

| Purpose      | Primer Name | Sense Primer Sequence(5'-3') | Antisense Primer sequence(5'-3') |
|--------------|-------------|------------------------------|----------------------------------|
| Used as qPCR | A4A49_35842 | ATCACGAACCCGATTCTG           | GCGTTGGAGGAAGTTTACA              |
|              | XLOC_068538 | ACACTCAACACTCTGTGCTCA        | TGAGTTGTCTGTGCTTAGCG             |
|              | XLOC_004979 | TCATCCACTTCATGACCG           | ATTCTGCTCTGTCCTTGGC              |
|              | XLOC_067237 | AGATAACGCAGGTGTCCTAAG        | CACGGTTCGTATTCGTATTG             |
|              | A4A49_22746 | CACCAACTCCGTGAATACC          | CAGCAAGTCCTACAAGAGGTT            |
|              | XLOC_004262 | TGACCAAGGCGTTGACTT           | TCGTGTGCTCCCTACTTTG              |
|              | XLOC_047700 | TCCTTGACAATGGAGATGC          | TGTTGAAGTGGTTTCGCC               |
|              | XLOC_064893 | TTCTGTCTCAGTCACCGTGT         | CCTGAAACTACTTGTGCCAA             |
|              | A4A49_66050 | AACCTGGACAAACACAGTTG         | CAGAAGACAGAGTGGATGAGG            |

|                             |                      |                                               |                        |
|-----------------------------|----------------------|-----------------------------------------------|------------------------|
|                             | XLOC_056844          | AGGAGCAGGAGTTGGCTTA                           | TTCCCACAAATCTACACTGG   |
|                             | XLOC_062761          | CCATTATCACTTCGGAGACG                          | CGGCACAAGATGAGATTTC    |
|                             | A4A49_16865          | ACTCTCTTGTCCATTCCGTC                          | TAGACAATGAGGACGGAATG   |
|                             | XLOC_065054          | AGGCGTTGACTTCTTGAAAC                          | GCTCGTGTGCTCCCTACTTT   |
|                             | XLOC_002153          | CCCACCTTCTTCCGAATA                            | TCCAGAGGATGAAAGTAGCAG  |
|                             | XLOC_030708          | TGTGAAGAGAGAGGACTTTGAG                        | CCCATTAGATGACCAAGTGTC  |
|                             | XLOC_065000          | GAGACATCCTGAAGCCCTAA                          | GCTCAAGAAATCGCTGAATG   |
|                             | XLOC_019534          | CGTGTGAATCTGTGATGGTG                          | TCTGCCAAACCCAAACGA     |
|                             | XLOC_006393          | ACGCTCACAGGAAACAAGC                           | CATCAACTGAATCGGAGACTG  |
|                             | XLOC_030801          | ACATCTTTGAGTTTCCCTGC                          | CATAGGTGAGAAGGAAGCCA   |
|                             | XLOC_000037          | AAACTCACCTCTGGAAGAAGG                         | TTGACATTACGGGAAGC      |
|                             | NbUBC                | TGGAGGTACATTAAAGCTGACAC                       | TCACAGAGCAAAGACTGGATTG |
|                             | NbMIR168c            | TGGAAGGGGCATGC                                | GTGCAGGGTCCGAGGT       |
|                             | NbMIR168c-steam-loop | GTCGTATCCAGTGCAGGGTCCGAGGTATTTCGCACTGGATACGAC | CTCCTCT                |
|                             | NbAGO1               | CGTCCTACACAGATGGGATTA                         | TTTACACCTCTCAGTGCCTTC  |
| For cloning of silent genes | TRV:XLOC_006393      | TTGGAGTTATACGCTCA                             | CTCGCCGGCGACAATGAC     |
|                             | TRV:NbAGO1           | TATTTTCGAGAAACATATG                           | AGCCTCAACTTGTGCCAAC    |

Table S2. Number of transcripts annotated in different databases.

|                     | Transcript Number | Swiss-prot Database | NR-Database | Pfam-Database | KEGG-Database | KOG-Database | GO-Database |
|---------------------|-------------------|---------------------|-------------|---------------|---------------|--------------|-------------|
| Transcript number   | 332628            | 135068              | 222956      | 170648        | 92179         | 188840       | 116847      |
| Annotation rate (%) | 100               | 40.61               | 67.03       | 51.30         | 27.71         | 56.77        | 35.13       |

Table S3. Characteristics of genes and transcripts in N.benthamiana.

|            | All    | Median GC% | Mean GC% | Min Length | Median Length | Mean Length | Max Length | Total Assembled Bases |
|------------|--------|------------|----------|------------|---------------|-------------|------------|-----------------------|
| Gene       | 65144  | 39.60      | 39.54    | 201        | 547           | 839         | 20418      | 54714923              |
| Transcript | 196798 | 39.70      | 39.62    | 201        | 876           | 1139        | 20148      | 224179653             |

**Text S1. All of novel lncRNA sequences that were identified in this study.**

&gt;TCONS\_00000040

AAATCAAGCAATTCATGATTAGCTAAGTAACTCACCTCTGGAAGAAGGAACCAGCTTCCGTCTTTTTCATA  
AAAGTCACGTATTGCCACAAAGGGCTTCCCGTGAATGTCAAGAATCCCGATACTCCTCTTGTCTGACAGCTTA  
CAAATAGTTCGACAATTATTCTCATTGGAATCAAGAAAATTCCCATAGGCAATGAACCATCTGCTTCTTGTTT  
TTGAGTAGGTACGTTGTCTGCTGACAATTGTACTTCAGCTACAAAATCCAATGTGGGTGTTCAACTGTTGAG  
AGTAAAAAAGACTCAATAACATGCCTTATAAACTGCTTCTCTTGAATGTTCAATATCTCAGTACCAAGCTGCT  
GGGCTACAGTGGTTCGAACACTGTACTCTGTTGCTGTTTCTATGTCAGCTGTTTAAAGGATGTCCAA

&gt;TCONS\_00000056

AGCGCACACTCGATTTTCGACACCGAGAAGCAAAAAAGCAATGGAACCTTCACTTCATCTTCAAGTTTTCTTGA  
ATTTCGAGACAGACGCATAGCATATCCAATTCCTCACGTCACTGAATCAACAAAACCAACTATTTATACGAA  
ATGGAGTTAGGGCTGGTCACCTGCTAAGAGCTGCATGGATTGCTGCAACTTTGCCAATTGTTATTGCTTTGAT

TCCTTCCTCAAAGCTTAGGTCTTTTCAACAGTTCTTGTTAGGGTTTGCTAAGCGTGGCAAGATTGTGCAGTCTT  
CCTCAAAT

>TCONS\_00000148

GAACTCAGCGGTATAGGCTTTCAGATCTCAGATTCTCTGCAATCTCAGTTTCCCATCGATCTCCATTCTCAAGA  
AGCTTCTCCTTGTCTGTAAGGAGTTCCTCATGAGTTTCAGTTGCAAATTCAAAGTTAGGCCCTCAACAATGG  
CATCAACAGGACAGGCTTCTTGGCAGAATCCACAGTAGATGCACTTTGTCATATCAATATCATA

>TCONS\_00000359

ATCTAGACAGCAAGCTGAGGTGATCGCATTGTCTAAGCTGACATGCTTTGTGCTGCTTCATGAGCATAATAAT  
CTGCTCCAGCCCAAATCAATCTGGAATGCAGATAAAGAAAGAGATAAGTGCCCACTTGTGGAGCACATATTG  
CACTTGGATTCTATAGAAGTGAACATTTCCCAAGGTATAACATTGCCAGATGCCCCCAAATTTGGGAAAGTGT  
TTGGAGGTCAGTTTCTTGGGCAGGTAAAATTGAAATGTTT

>TCONS\_00000391

GAAACCAATTAAGGCCTCCATAATCAGTTAGCTGGCATGTCATGAATTTGCTGCAATTTACCTCTGCTCAACT  
AACCACCTTTTCTCAACTCTCTCCTTTTCTCTTGACTTTTGTGGACTAAGTTTGAGCTAAATTTGATCTATTCA  
TGTATAAATTCATAGAATAACATCACTTGGATTGATAAGAAAGATAAGTTGTGGATTCTTTTAATTTTAGGGA  
AGAATGGAAAGTTATACGGTGAAAGTTGAAGAAAGTCGACCGGCAGTTGATGGAAAGCCATCTGCAGGGCT  
AGTTTATAGGTGCATTTATGCTAAAGATGGTCTCATGGAAATGCCTTTTAGTTTTGAGTCACCTTGGGATTTCTT  
CAGCTCTTTTTCACACAATGTACCTCATAATTGAGAGTTTCAAGAGTTTACTGGAATTGATTTTAAGGAGAAG  
ATGTATCGTTTCATGCTT

>TCONS\_00000426

CTGGTAAAAGATTTCAACTGGTTCTGCATGCACGTTGGTTTCCTCTGTTGTTGCTGAGAGATCCATGGGTTCTT  
CACCTGGTATGAACTATAGTTAGCAGTACCAAGGAACTCTGCTCTTTGTCTACCAAACCTTAAGCCTTGCAG  
GGCAGCATCTTTAGTTTTTGTACTTCCTTCATAAACATCTGATTTACCCCTTCATCAGCAACAAGTTCTGGAG  
CAGCATCTTCACCTCCCTGTTTCATCACGGATCTCATTAACATCGGGTTCCAACGGCAAATTTCTCATGCTGGCTT  
GGTGGAAAGACAAAGTGACCAGACATAAACATTGCCTGGGAAGTCTCAGCTACATACTCTGCACTACTATTA  
TTATCATCATTCGGATCAACCTGCTTTGGACCAGGGGCAGCAGCATATGCTGATTGTGTAAGTGACACAACCTT  
CCCACTCATTTCCACGAGGAGCAGTTTCTCCCTTCCTCGTTGCTAGCCATCTTTCGGAATTTGGAACAAA

>TCONS\_00000794

AGCTATACATACTTTTATTGATAGTAAAGCAGTTTACAGAGGAAAAGGGAAAAAATTACTAGAAGCACAGGT  
GCCAAGCATGCAAGGATTTGCACACCAGTTTCTTATCTAACGTGAAAGAACCAGACGCCATCCTCATCCTTG  
TCATAATGCCTTTAGAAATAGAATATGCAGCAAAAAGCTAACAATTCTCCGAAATGCAAGTCCAGCAGTTAT  
GTCACCGGTTTGAGAAGGGAACCTTCAAGGAGATGGATAGACTGAGATTCTTGCTCAGGCAGTAGCATCAG  
GCTGCTTTTCTGGCA

>TCONS\_00000825

CGGAAGGACATTCTAGTTCTAGTAAACATATGTTTAGTTACAAGCTGTTCAAATTTTGAATTGGAACAGAGC  
GATACAGAAACAGAGTGTGAGCAGTTAGCCACAACAGTTGCTCTTCTGCTCAATTGGTTGTCCTTTGATTTGA  
ACAGTGCTACCTGACTTCTTGGCTCCAGCTGGTTGATTACCCATTTTTTCTTGATCTCTCCCGCCATTGTTAAG  
AAAGCCTGTTCCACGTTAATGGAGTCTTTTGCCTCGTCTCAAGGAAAGGGATACCTAGCTCATCTGCCAAAG  
CCTTTCCCGTCTGTGTGTCCACAACCTTGTTTTCTACCAAATCGCATTTGTTTCCACAGAGCTTGCAAACA  
CTCTCATTTGCATATCTGTCAATTTCAATCAGCCATTGCTTGACATTGTTGAAGCTCTCCATCTCAGTTACATCG  
TAAACAATAATGATCCCATGTGCTCCCCGATAATAACTGCTTGTTATAGTGCGGAACCGCTCCTGGCCTGCAG  
TATCCCAAATTTGCAGCTTGATTGTCTTTCCATCCAGCTCCACCGTTCTAATTTTGAATCAACCCCGATGGTG

CTAATGTAAGTGTCCACGTACGAATCATCGGCGAATCTGAGAAGAAGACACGATTTGCCGACAGAAGAATC  
GCCGATTAATAACAGCTTGAACAAGTAATCATATTCGTTGCTCATGTTTTCTTATTCCTTTTTTGGCTAATGGAG  
AAAAAAGGTTTTTTCTTATGCGAGGATTTCT

>TCONS\_00000972

GAGAGAGAGAGAGAGAGAGAGAGCAGCTGCCGGTTACTTTCCCCGTCTCTGGGGAAGTCTCCAAAAATCAATCT  
TCAGTTTGTTGATACCAAATCCCAGCATCAATTGGAAATCAGAGTCTCCGAAGAGATCTTGGATGTGATTGAG  
GAGGGTTTTGGTTTTTTTAAATCCTCTAGATTCTTACCTTGTTTAAAATCCGTGCAAAAAGATTTTCTTTTGATG  
CCATTTTGATGGCGAAACGACCCGAATCATCGGTTGGATACTCTGTCACTATAACCACCTCCTCAGCAAGGCAC  
TGCCCAGTCACCAATTTTAGTCCTCCCCATTCCCAACAACAACAACAGGTCCCATATTCCTCCACCAATT  
GTACAACCGAACTAGATTCCTTCTCCGTCCATCAAGACCCCCAATTTACCATCACCGGCTAATGGAGTTAGAA  
CTGGAAGCCCT

>TCONS\_00000973

GAGAGAGAGAGAGAGAGAGAGAGCAGCTGCCGGTTACTTTCCCCGTCTCTGGGGAAGTCTCCAAAAATCAATCT  
TCAGTTTGTTGATACCAAATCCCAGCATCAATTGGAAATCAGATAGATTTATCATCCCGGAGAAAAGACCTC  
ATCTGGAGTCTCCGAAGAGATCTTGGATGTGATTGAGGAGGGTTTTGGTTTTTTTAAATCCTCTAGATTCTTAC  
CTTGTTTAAAATCCGTGCAAAAAGATTTTCTTTTGATGCCATTTTGATGGCGAAACGACCCGAATCATCGGTTG  
GATACTCTGTCACTATAACCACCTCCTCAGCAAGGCACTGCCAGTCACCAATTTTAGTCCTCCCCATTCCCA  
ACAACAACAACAGGTCCCATATTCCTCCACCAATTGTACAACCGAACTAGATTCCTTCTCCGTCCATCAAGA  
CCCCCAATTTACCATCACCGGCTAATGGAGTTAGAACTGGAAGCCCT

>TCONS\_00001055

GAGTGTAAGAGTGAGAATTCATGTATGCCCTGCTCTGCTGTCCATGGACTATTATTGTCATGGATTTATTTTA  
GTTTGTCTATGTACTTTGCTTCCACAATATCTTCTCCAGAAATGAAGTCAAGGAAATCACTGAAGCCTCCTTCT  
TTGTAGGACAAGATATGTTGTTTCATCGACAAGTGCTGGTGCAGGTCTAACTTTCTTGCCTAAAGCTAGACTGA  
GAAGGCTGGCAATGGAAAGCCGCTTTTTCTCTGAGTTAACTGTTGCTCGGTGGAGAACACCTTTGTATCTACC  
ATTGCTCAATACTTCCATGTGATCTCCCAGCTGAACAATGAGGGCTCCTTCTATGACTGGAAGTGAATGCCAC  
TTTCCATCATGATCCATGATTTGCAAGCCCTGATGATTTTGAAGAATGATAGATAGCAAAGCATAATCTGTGT  
GTGGTGGCAAGCCTAGTGTAAGATCTGGCTCAGGACATGCTGGATAGCAATTAACGGCCATGACCTGGGAGC  
CTTCTGCAATATCTTCATTACATGATTGCAGGTGACATGACACGAAAGATGTACCTGGAAGAAACCTAGTTCC  
TTGCAAGCCAGGTGTGCTTCCTCGATTATCCGAGGCCGTTGAAGAGGGTGTGCGAGAAAGGATAGATCTACA  
ATTGGCAGGCATGTGTTAGACCGGGTCCATCGGGGCGTAAGGATGGCGGAAGAATGTAACGTTTGGAAC

>TCONS\_00001056

GAGTGTAAGAGTGAGAATTCATGTATGCCCTGCTCTGCTGTCCATGGACTATTATTGTCATGGATTTATTTTA  
GTTTGTCTATGTACTTTGCTTCCACAATATCTTCTCCAGAAATGAAGTCAAGGAAATCACTGAAGCCTCCTTCT  
TTGTAGGACAAGATATGTTGTTTCATCGACAAGTGCTGGTGCAGGTCTAACTTTCTTGCCTAAAGCTAGACTGA  
GAAGGCTGGCAATGGAAAGCCGCTTTTTCTCTGAGTTAACTGTTGCTCGGTGGAGAACACCTTTGTATCTACC  
ATTGCTCAATACTTCCATGTGATCTCCCAGCTGAACAATGAGGGCTCCTTCTATGACTGGAAGTGAATGCCAC  
TTTCCATCATGATCCATGATTTGCAAGCCCTGATGATTTTGAAGAATGATAGATAGCAAAGCATAATCTGTGT  
GTGGTGGCAAGCCTAGTGTAAGATCTGGCTCAGGACATGCTGGATAGCAATTAACGGCCATGACCTGGGAGC  
CTTCTGCAATATCTTCATAGAGAAAATATATCTATCAGAAATCATTTTCAGATAAGGGTGCAAACTTACTTGT  
AACATGTGGGATTTGATGGCCACAAATCAATCCAATTTGAGATTGGATTAGCATAGTGCTTGAGGAAGTCTCT  
CCAAAAGGATACTTTGTCTTTGACATCATTTAGGCTGGTATTATACCTTACGGGATCATGAACATTTGAAGAC  
AAGAGATGCATTTTCTTTTCATTTGGTAAATCGAAGAACTCAGTCGCAGCTTCTAAGGCATCTTTCATGACTGA

CAATGGGATTCCATGGTTGACTACCTGCAGAGTCATTTATTGCATGCATGCTGTTATTTTACGTCCAGGTGACA  
TGACACGAAAGATGTACCTGGAAGAAACCTAGTTCCTTGCAAGCCAGGTGTGCTTCCTCGATTATCCGAGGC  
CGTTGAAGAGGGTGTGCGAGAAAGGATAGATCTACAATTGGCAGGCATGTGTTAGACCGGGTCCATCGGGG  
CGTAAGGATGGCGGAAGAATGTAACGTTTGGGAAC

>TCONS\_00001063

CTAGAAGAAACACACCTTTCTGCAAAGATGATCCAATGTCAGCAACCAGCTGAAATTTCCAGCTTCATTACA  
TAACATGTAACGAGCACGGCTGATGTCTGACCCTTCGTTCTCCATTAGTTTTTGCAAAAAGGAATCGTGATA  
AGACTAGATATTATGCCTCGTCAAAATTTCTGACCCACTACTGGATGCTTTCAGGGAATAAATGGGCATCCT  
GGCCAGCTTCTATTTGTGATATCCGTGTTTCTTATGTTACCATGAATAAACACCTTCGGTTCCTTTACCTACATG  
ATGCAAACAGGTTAAAGTAACAAGGATGCTGCCCAGAACATTACAACATCATTTGACATCGTCTAAGATAT  
CCTTACCAGTGATATTGGAGGAAAACCAATTCGTACACAAAGCCGAGAAAAACCATCCACGCTCATCAGAC  
ATTTGAATCCTTTGATGTAAACATTCTCATTGAGAAGATATGTGAAATTTCTCATCTGAAAGTCTTCCAGATAA  
ATATTTTCTTCTTTAGAGTACCTCCATGGATAATTATCTTCACAAAATCGGGATATTCCATTGATCGCTGAAAA  
AGTGTCAATATGAACCCAGAGTTCATCCGAGTTCCTTTGTTATACCACCTATCCTATGCAGAGGTTTTAGAGCAT  
AACCCTAGGATAGTTTTTCGTATGATGCCATGAAAAAACTGCCGTGCAGGCTAGACTGCCAAGCATTAAATC  
CCAGCATAGCAATGTACAGAACTTCCAGAACTCTTTTCTGTTATTATACCTGCATAAAGTTGAGACTTG  
AG

>TCONS\_00001087

TGATCATAGTCATATCCTCCAACATCCTCATCATAATGTACATCCTCGCCAAATGCTTCTTCGTAAGTCTCATC  
TACTTCCGGATCAATTTTGCTGCTCTTTACCATGTTATTATCCATTGAATCATCCACATTTGCACTTTTCTTTGGG  
TTCTCAAGTTTTGCAGACTCATCAAAAAGCTTCTCTAGCACATCATAGTTGATCTTAGAGCTCAGCCTCTTTCT  
AGTTAACATTTGCTTCGTTGCTTCTGCAGCAGTTTGAGCAGGACCAGAATTTTTCAGTTCTGCAGCCCTTTTCTG  
TTGTTTTTCTTTCTTGATTTTGCAACAGCAGCAGCAGCAGCAGCCGCAAGCTCCTGTGCAGCTTGACATCCT  
CCGAACAGTTAGCTAAATTGAACTCCTTATCGTTCTTTGCTGCTAATTCAGCCGCTTGCTTAGCCGCTTGTTCT  
CAAGATATTCTCGGTTTCATCTTTACCCAAATGATCTCCTTAAAACGCCTCTCCTCCTCATTGTGAAGATAACCA  
TCAACCTCTGCATCATCGATATCGGAAAAGTTCTCTGATTTCGTCATGATCATCAGGACCCATACCATCCAAGC  
CATGTAATGTATCAGGAGTCGCATTATCATCAGTTTTAGCCACTGATAGTGCCCTATTATCTCAGACCCTGAT  
ATCTGCAAATATTTACTTCCAGTCACACTCAGGGTGCTCCCTCCCTTTTCAGGCTCCAGATACTCGCCATCATT  
GTTCTCCACCTGATTGGACATAGGAATATTTGGATCCTCAGCATTTTCTTTCAGCAGCTTCTTTTGCCATTAATCT  
TTCCCTCTCAGCGCGTTGGAAGGCTGGAGGTTGAGAACCTCCATCAAGCCACCTGAAAGTTTTACAAAATCA  
GTATAACAACCTTTCACAAAGACCATGGGCAAAGGGCAGCTCAACGCTTTTCTTGTTGTTACATAGCACTTCTG  
TGATCCCAGATCCTTTGACGCGCGAATAAAGTTGCACGGTCAGCCTCTCTTCTTTCTCAAGCTCCTCAGCCCTT  
GTATTGAACTCATCAATCGTTAAGCTTCCAGATTCTGTGTTTTCGAATTCAATCAAACGCTTTGTCAATGTTGC  
TTCACAAATGCGCACGACTTTGATAATTTCTGATTTAGTACAACCTCAGTCCATATGAAAGAGCAGAGATGTAC  
AGTGCAGTCCACATACCCCACTCGGCTTTCTCCCTGTCTGCATCCAATCTCGCTTCATGCTGGCCACAATGTG  
AAGTGCAGTTCTAGAAATATTTGGCTTCCTTCCCCCAAATAAACGATCAGTGAATCGATGAATGAAAAGGCT  
AGGATCCACAGGTTTTTGAACAATTGGGTGATTTTCAAGGCTTAGAAGCTTGCAAAGCTGTAAGAACACAGC  
CCCTAAAATATACACATTTATCCTCAAGTACTCAGAAAAGTCAATGAGTAGGAATGGCTTTTTGTTCTCCCTG  
CATGCAATGTAAAGACACGCAGCCTCAACTTGCTCTTTCCTACGCCCCCTTGTAATTCCTCTCAACTGCTAT  
CGTATAGAAGGCCAAAGCTGGACGAGCTATTGAATCACCACCATCAATTCCTAATGCATAAGCCATACCCCTC  
TATATCACTATATGCTTCGTTAAGTGTCTTTTACGTGAAGCTGAATAATCACTTTTGACCGTCTCACAAGT  
TCCCTGACAATTGGCTCTGTCCAGCAGCATTCTTAACAAAAGTGGGCTCACTTGAAAAATTATCTTCATCAAG

AACTCTTCCACAGAAGGAACAACATATTTTACCATCCACATTGTTGGATTGCCTGTTCTCTGCACAATAACCA  
CACCAAACCATGCTCGAAGTAACCTGAATCAAC

>TCONS\_00001088

ATCCAGTAACTTTCGACCACATAAATTGTACCCACAGAAAAATGATACAACCTGCATCCAATCTCGCTTCATG  
CTGGCCACAATGTGAAGTGCAGTTCTAGAAATATTTGGCTTCCTTCCCCCAAATAAACACATTTATCCTCAAG  
TACTCAGAAAAGTCAATGAGTAGGAATGGCTTTTTGTTCTCCCTGCATGCAATGTAAAGACACGCAGCCTCAA  
CTTGCTCTTTTCTACGCCCCCTTGTGAAATTCTCTCAACTGCTATCGTATAGAAGGCCAAAGCTGGACGAGCT  
ATTGAATCACCACCATCAATTCCTAATGCATAAGCCATACCCTCTATATCACTATATGCTTCGTTAAGTGTTCT  
TTCACGTGAAGCTGAATAATCACTTTTGACCGTCCTCACAAAGTTCCTTGACAATTGGCTCTGTCCAGCAGCA  
TTCTTAACAAAAGTGGGCTCACTTGAAAAATTATCTTCATCAAGAACTCTTCCACAGAAGGAACAACATATTT  
TACCATCCACATTGTTGGATTGCCTGTTCTCTGCACAATAACCACACCAAACCATGCTCGAAGTAACCTGAAT  
CAAC

>TCONS\_00001306

CTTTTCTTACATCGGTGTTGTCAGGTCAGCTTGACTAATCCACCAGGCTCTTGTCCAGCCAACAAACACAAGTT  
GCCAAGGTAATCTTGATCATCAAGGCTGGAGCTGGAGTAACACAAAATGTTGTAGTTGAGATTGGAACCTGG  
GATCTCCAGTGAGCTGGATTATGACCTTGCTACTAAGGCCCGTCTAGCAGCGGCATTGATGACTCTGCCAATG  
TAGCACCATCTAATAACCAGTTTGCTAATTGCCTTTTGTTATAGATTATAAAGGAGTGAAATTGTTTTATTAG  
TAGCCGAGCACAGCTGTCAGTTTATTCCATTTGTAAAATGTGAAGGCTTAAGGTGTTCACTCTCTACTGAAAG  
GTTGGCTTGAGAATCACTAGTATTACGAGGAAATACCAGATGAGTAAAAGAACTTGATAAGTTTTTCATATC  
CAATAAGGTTTACATCAGGGATAGATCTCATGGTAGTCTTGGCGAGAGCTAAATTCTTCTATCCTAGTATTTGC  
TTCTTATAAAGACAAGATATCCATTTGACTTTGCTGCAGGATTTTGCAAAAAGATGATCATTCTCAAACAAT  
TTTGGTGGATTAAGTGAAGGTTTCGTCAGCTCCTCTTTGGAGCATTCTCCACTGAGACATGTTCAAGTGAAG  
AATGTTCTAGTTGGGAGTCATCTGTTGATTTATGAACAGATCCTTTTAGTTGCAACTTGAAGTTGGAAGTGAG  
CTTATGCAGAACTGACTGCATGTTGAAGTTTATGTTTCGGCTGGATGAAA

>TCONS\_00001315

CTATCATTGGTCCTCATTTTGTATTTTCTTATCCTGATCTGTCAATTTGGTAAAGTTTACAATACATATATCTAC  
AAAACAAATTCCTTTTGCAGAAGGATTACAAAAAGGATATATTGCAATTAATGTGAGCACTTTCTGGTCA  
GCTCAGGAGAGTATTTTCCGCCATTTTGCAAGATAATCTTTTCCATCTCCTTCCGCTCATCTATAGGAATTCTG  
GTGACACAAATTGTCAACCCAGAAAAAGGAAGGACTTTGAATGACTCCTGAGGAACAAGACGGTGTTCTTTC  
CAGCATTGCTGAAGCCAATCAATAGTGACAATTGGTTTCTTTAGTTTGTTTACAGCCCCTTGTACTTTGCAGC  
CAAAACATTCTTCACAATAACAAAGCTCACATCCAATGAGGCTTTAGTATGCAGGACCCCTCCCATAGCACT  
CACCAACTTTCCAAGTTCAACCTTTTCATCCATCTCAAAACCAGATGCCAGGATCTTGACCCCATCCATTGCA  
AGGCAACAAGTAAACCCCTGCTGGGGTAGTGGCCTCTGTTCTTTGGCACAAGAAAGCACGCACTGAGGACCT  
ATCAAGTTGCAGCCCTTAGCTTGAAGATCCCCAACTTCTCATGATGCGGAGAAGAAATGACGTGGTAATCA  
GTGCAAGAATTCGGGAGGGTTCGCAACAGAGAAAGACTAGAGCTCCGTTGTGCTTGAGCGCGTCGTGAAG  
CGCGTCGAATTCCTCCGGCGGGACGAGGTTCCGCGACATGAACACACTCGCTCCATTGAACACCTTCGTGCTC  
ATCATCTTCTTCTCTGCC

>TCONS\_00001349

CATATTCAACGAATAATCACTTTCTCGCTCTAACTCGCGCATCATCTCTGTCTCAACCCAAACCATTCATCAA  
TCCAGGCAAAGTAATTACGATGACTTTCCAGGAAAAGAGCCCTTTCCCCCGCCATCAAAGCTTGCTCCAATTT  
TCCCCCAAAGCCCCAGTATGGAACATCTATTGTCACCAGTTTGTATGCTGTCATAACGGGACTACATTGGTCC

TGAAAATACCAAGTAAGTCTCAAGTTAATAGAAGTCTTCTTAATATAGGTCGGCGAGTAGAAGTCGAAATGC  
ATATTATTGAAATCTTCAAACCCTGAAGC

>TCONS\_00001509

GGAAGCATCATTTGAACATCCAGATCAGAGAGGACCTTTTTTGAATATCTTAATTCGTATAAGTATTTAGTTGT  
CTGACAAAGCTAGAGAAGTTGTTGTGTTTGAAGAATCTGGGGAGTAACTAGTGGAGAAGGCATGAGGATCC  
CAAACAACAAAGCTTTGACCACCTCTGTTCCAAGAAACAACATGATCTGTGCTTGAATCATCCACCATTTCAT  
ATGTCTTTGTCAGGAATGGTGGTGGACCGATGTCGTGTAGCCCCCTCTTTGGCTGTGGTGGTGTCAATTACCGCC  
GGCGGTGGCTCACCGCCGCCACCTCCGGAACCTTGATCCGGG

>TCONS\_00001543

AAAACATACAAGAGATCATGAAGCGAAATTTACAATGCCAAAGCACAACCATGTCAACGGACATTTTCCAT  
ATTATCTAGATTTCGCACATACCATTTAGACATGTAATATCGGATAGAATACCAGGTGAATCAGAACAACACA  
TAACAGACGTAATCAAAGTGTATATCAAACCAGCACAAAAGAAGGCATGAACTGTAGCCAACACACAAAT  
TCTCCTAATAATTCTTCAAGCTGCAATATCTTTAATCTTCTTTGCCCCCTTCTAGATCTTGTCAAGCTTCTCTG  
CCTTCACAACAGGGTTGGCCTTTGCTATTGCATCTTGGGCAGCAGAGCGGTAATCAAACCTGGCAGTCATGTTT  
ATCCGAGTAACGGTGTGCTCCACAATACAGGTGACCGCAGCGACACTTGAATCCAGTGAAGCCAACCCTTTT  
TTTACAAGTGCCGCAGCGGTTAGGACCCTCCTTAGCCTTTACTTCAGAAACAACACTGGAGCTTGAGGTTGGA  
GATGATGGCAAAGCTACAGCCTTTGCTTCCACAGAATCAGATTGCACATCGACTGAGCCAACAACAATCGTT  
TCCCCCTTCTCACTGGCGGTTGATCCATTGACAAGGTTTTCAATCGATGATGCAGCTAACTTAGCTTGTTCTTG  
TTTCAATACCGTGTCCCTGTAACACTTAGAGCACATGTTTCATGTTTGCAGCACTTCCAAAGAAGCCACAGTTG  
TTAACGCACAAAATAGGGCCTTCAGGAGGGGGTTGGCATCCCGTCTCATCATGCTCCATATTGTCAAACTCC  
CAATTCTTGAGGTAATCCAACAGATCCACAAACACAGCAAAAAGAATTGTAATACTAAATATTAATACAAAT  
CATAAAATAAAATACAAAAAGAGATAAGAACAAAAGGGGTTTTAGAAATTAACCACGTAAGAGATTAAGAT  
CGCCGCAAGAGAGAGGA

>TCONS\_00001544

AAAACATACAAGAGATCATGAAGCGAAATTTACAATGCCAAAGCACAACCATGTCAACGGACATTTTCCAT  
ATTATCTAGATTTCGCACATACCATTTAGACATGTAATATCGGATAGAATACCAGGTGAATCAGAACAACACA  
TAACAGACGTAATCAAAGTGTATATCAAACCAGCACAAAAGAAGGCATGAACTGTAGCCAACACACAAAT  
TCTCCTAATAATTCTTCAAGCTGCAATATCTTTAATCTTCTTTGCCCCCTTCTAGATCTTGTCAAGCTTCTCTG  
CCTTCACAACAGGGTTGGCCTTTGCTATTGCATCTTGGGCAGCAGAGCGGTAATCAAACCTGGCAGTCATGTTT  
ATCCGAGTAACGGTGTGCTCCACAATACAGGTGACCGCAGCGACACTTGAATCCAGTGAAGCCAACCCTTTT  
TTTACAAGTGCCGCAGCGGTTAGGACCCTCCTTAGCCTTTACTTCAGAAACAACACTGGAGCTTGAGGTTGGA  
GATGATGGCAAAGCTACAGCCTTTGCTTCCACAGAATCAGATTGCACATCGACTGAGCCAACAACAATCGTT  
TCCCCCTTCTCACTGGCGGTTGATCCATTGACAAGGTTTTCAATCGATGATGCAGCTAACTTAGCTTGTTCTTG  
TTTCAATACCGTGTCCCTGTAACACTTAGAGCACATGTTTCATGTTTGCAGCACTTCCAAAGAAGCCACAGTTG  
TTAACGCACAAAATAGGGCCTTCAGGAGGGGGTTGGCATCCCGTCTCATCATGCTCCATATTGTCAAACTCC  
ACGTAAGAGATTAAGATCGCCGCAAGAGAGAGGA

>TCONS\_00001587

ACTACAGATTTATCAATGAAGGTTGAACGAGTAGGTAAGGGCTTTGAAGCCATTGTCTTTCTTCGTTTTAACTC  
TCTAAACGACGAAGTGCATGAAAACAGAATCTCCCGAGTAAGCGGAACCTCTGCCGGAAAACCTGAAACAGC  
AATCTCCACAGCAAACCTCGAACTCGGCTGATTTAACTGAGACCTCGATGACAGAGGTGGCTTGAAATGGCA  
AAAAAAGTAACTCCA

>TCONS\_00001596



CTTTGACATTAGAGCAACCAACTGAACCCACTTGAGATTGAGAAGAAAAGCAGTCGCAAATAGAACACTGC  
AGTGTATATAACCCCTCTTTGTTTACGGAACAGATTAGAACTCGAAGATTTGCACCAAGAAAACATCAAA  
AAAGGAAAACATAGTCCCCTGGCCTGTAAATCAACATTAATAATATCTTCAGCACCATCCTCATCATTTATTT  
CAATTGAAAACGGAATAAATAAGCCTATAACCAAAGACGAGCCAAAAGGCTACAACAAACACGATCATCAT  
TCATTCTAACATGAAGGATCTGCATTACAGTTGTTTCTTGGAATAAGTTACATGAAAATGTTATGCCTGATAA  
GATTTTAAAATGATAATACTATCAACTTCAATTTTTATGATTCATGAAAACAGAGAACGACTTCGATTGCGCT  
CCAGCCGAGCCTCCCTCTCCTTTTTCTTGCAATTCCTTGTAACATCAAAATGTTCTTGACATTTGCTCTTGCTG  
AGTTAAACTGTTCCAAACATTTGAGAGAAGCAGTGTACTGAGGGTAGCAATCGGAATCAGAAATTCTTGCTG  
CACTTGGATATGCCGGTGTGGATTTTGAACCTCGCCATTTTGCCTT

>TCONS\_00001712

GCAGTAGGTTGCATTTCAAGTGTGCCCAATTCGTTGTTTACAACCTCAGCTACCTTTCCATTGTCACTGGAGCC  
TTTGAGAAAGATGCAACTTTCTCTGAAGTAGTGTTACAATTAATAACCACTGATGGAGGAACAACATAAGA  
AGCATTAGTGAACAACCTCTCTGTGACAATCTTTCAGCCCAATTTTCTTCACACTTGAAGTTGCATTGTCACCTT  
TAGTGCTCTCAGTTGCCTCCCCAAGAGATTTTGTTCCTTGACTTATTAGAAGATCTCTTTTTGAAGCCAACGT  
CTCCATCAACCTTCC

>TCONS\_00001764

AAGTAGCATTAAAAGACCAAGCAGAACTCATTGAATTCTTGCTTATCCCATTTTATTCAAACCTATGGAAAC  
CAATTGTATAGTAGTGCTAACATTGTATTGTCTGGAGTATTCTCAGAAGCAACAGAATGCAAATACAACCTCAT  
TGAACCTCAGCAACTTTCTTCACCTAAAAATAAAGTCATTTCTTCATTTACTTCTCGGATGAGTTCGGGCCCCCT  
CTTCTTCCCGAAACCAACAACCTGCTGTGACGAATCTGCGGTTGTATTGCATCCTCTTGTGAGCACGGCCGCGG  
GGCTTCTTCTTCTTGCTCTGTTTGGCAACCTTTGGAGTTTGCCCCCTCACTTTACCAGCACGAGCAAGTGATCC  
GTGAACTTTCCCATAGTGATATCTGAGTCGCCGTTTGCCGGTGAAGTTAGGAGCGTCTGGAGCTGCTCAGGT  
CAGGACTCTTAG

>TCONS\_00001807

GAGTCACGTCAACAACGGCAAGACAGAGAAACATAATAACCATGAGTAGAAAGCAATACGCAATAGCAAA  
AACTTCTAGTACTTTTGAGGTGGCTTTTGGGTTGGAAGCAAACCAAATCGCTTCTTCAGAAGCACTCTTGCCT  
TGAATATTTATCATCGGGGGAAAAGCGGGCTGGGTGAGCGGATTCTGTGGCCAAACCCAGTGTTGACTCTTT  
CTTAGTGGTGTAACCTTTGTCACCATTTCTCATTGATGTAAACTGGAGATACATCCTCGCTAAATTTTACCTG  
AGCTGCTTCGCCGTTTATGGAGCTAA

>TCONS\_00001836

TAGAAAGGTAGACATCCTTTCTGACTTAGGCAGAGTAACTTAAATGCCGTAGAAATAGTTAAATGAGATGAA  
GGCATAGGTTATATACTACAGTGGCCTGCAAAAATGTGTATGAAAGTTGATAGATGAGATAGTATTTTAACTT  
GTAAGGCGAAGGCATAGGTTATATACTACAATGGCTACTTGTACAGTTCTTCTCAACGTATGAACTTGTGAAG  
TCAAAAAAAA

>TCONS\_00001884

CTTTTTCCCTCTTCCGATTAGTCTATCTTTTTAGAAATTTGTTCCAATTGAGTTGTTATGTGGACCTACGCAATA  
TAGTTGAAACACTACTAATCCAATGTTGTTGATGTCATTTATCGACTATAGGCTTCTCAGTCAAAATAACTTCT  
TTATAACACTCTAGACACAACATCCTCCATCAAGCATCTCAAGCTTAATCGTATTTACATCAACCGGGCGAAA  
AAAGCGGCTTGGTGAACCAGTAGAGACTGCCTGCAATGCTGCCCAAAGTAAACCACCCTTCCTCTGGTCGGG  
ACCTTGTTACGGCTCAGTGCCTCGACATATTTCTGATTGAAAAGGAACGGGACTGAATACAATTCCTGCTG  
AATTACTAACAGAACCACAGTTAATACGGACCATGAC

>TCONS\_00001946

CATGACAAATAACAGAGCAATACAATCTTTGAAAAACAAATGGTTTCAGCAAGTCTTAGGAGGGGAGGGGGT  
GAGGTCTGCATTTCAACTACCTTCTTCCACGATTCTCTGCTAGATATCTCGTCCCACCACCTTCCCACGTTCTTT  
ATTGAAGTGAAGAACTCTGCTCTGTCTGTCCCGTTCACCAAATATTGGATGTTTGGAAAGGTGAGAGAGATCGG  
CCAATGTGAAGTCACTCTCCGGCCAAGTACTGACTCTCACCGAGCCTCTTTTCATACACATCAAGCACTTTTTTG  
AGCTTCTCTTCGTTCTGTCTGATCAGGTTCTCGTCTTGTTTGATCTTCATTCGCGGTGCAAAAGCCAACTGGAAT  
ACGAGAATTGAACTTGGCGGATTGAAGCTTTGTCCTTCTGCTTCTATCCATTGATCTATAGATGCTTTCTCTAA  
CGGGTTTGTTCGGTACAGCCCCTTGTTCCTTGATGTCCATATTTGTCACATATGTACCTATTTATAGATCTGGA  
TTCTGAATTTTGAGATAGTCAGGTTTCTTATGTTCCCTTTGGCCATATTAACAGGGAGAAGCTGAAAGTGGA  
CATCTTTTCAAGAAGACAAGCTAGAACTCTTGAGACTGCAGTTGACAAAGTCGGTCCATATACTTTCACTGG  
AGTAGCCA

>TCONS\_00001969

GTGGTCCAGCCTATTCTTGAAATAAACAACTCGCACACATCCCTTTCCAAAAAAATCAATACACCAAGCAC  
TACACTTAGATTTATTGGATTTGTTGCTAAAATATCGGTATTAAACCCGAACTCCCGGCAGATGGCCAGTGG  
CCCAAAGAAACGAAAGAATCGGTTACGTTTTTCATATGATCTCCTCTTATAGATAGACTAAAAAATCGAACA  
GAGTTCTTTTTGTAGCACTTCGCCCCTCTTTTATTTATTCTTTT

>TCONS\_00001978

ATGATAAAAGAATCAAGAAAAAGGATTAAAAAAGGACTTAACTTTTTAATCCTTTTTTTTTCCCTTTTAAACA  
TGAGGCTTGCTTCTCTTGTGATTAGCTTTTCCATCTGATCTTAAACACCACTTGAATCTCCTTCAGATGAAGC  
ATCAACTGATTTTGTGAAATTACAAGAAAGATCAGCATAAAGATCAACAACTCTTCTGATATTATTGTTAAGC  
TCTCTGATTAAACCAACATTTCTGCTCAAATTATCAGGAATCTTGGACTCATGATTCTGATTAAATCTCATTGAT  
TAGTAACCTATTTTGATCCAATATGTTCTGCACTTGTACAAAACCTTTCTGAAATGTCTGAAAAACTTTTCCAT  
CTACTTGAGTACCATTACCTAGGCCTGAAAATGTATCTCCCTCCATAATTCCTTTTGTTTTTTTTTGGTCCTTAGT  
TGGTGAAGAACAATCCTCTTTTCAATTCAAAACAGGTTCTTGAAAATCTGAGAACATTATAATTAAGGAAGA  
GAGGCAGTAGACATAGATTGGAAAAGCCGAAATGATCGGCGATTGAATC

>TCONS\_00001979

ACTGCATATCAATTCTAACTGTATAATGTTTTTCTCGTAGGAAGGATCAGTTGGACACAATGGTTCGAATACA  
ACAGAGTGAAGGTCAAGTGTTTGATTGAATTTACTAGAGGGTTTTTGCGGGGAATTAACCGCAAATACTAGTT  
TATCTCATTATTGTTGATAAAATGGCCTAGTCCTTCACATCTACCGCGCATTGTGCTCCAAAAGGTACTAAGA  
GAGGTTAGCCTATACCACAATATCTCAATTGGGTATATGATGTTAGCTCTAGCAGTTCTAGTTAGTAATATAT  
TACTTGAATTTTCATGCACAA

>TCONS\_00002101

CGAGTTCAGTAAATCGAGGCTCTATGTTGTCCTGGATGAAGAGAGTGTTCACTTCTTTCCGACTCATGTAT  
TGCCGTAGACACTGCTCTATCCGATTTTGACCATTTGTATATCTTCACAAGAGACTTTTCTTCCATCTCCGCTC  
GACATTTTGGAGGCTCCAACACTTGGAATATTGCAATAAAGCTCTATGCCAATATTTAGTAGAAGGTGACA  
CCCAGCTTATGCGTACCATCAATGAGTATATTGTAAGGTGGTCACTTACACCTATTGTCCAGC

>TCONS\_00002140

ATTTGCTGTTGCAGAATGAAAATATTGGAATGAAGTGCCGAATAAAGCGGAGTGGATACAGAGAATTGCAAC  
TAGGTCGGGATTGAGGTGTAGTTGAATGATTGATTGATCATTGTCCAATTGTTTCTTCAAATTATTTACAATG  
ATGAAAAGGTTAGGATCAATCCGGAGCTATGTCAATCACAGCATAACATCCTTCTTTCAACAATGTACAGTCA  
AGTAATGATCATATAATCTTCTTATCATCAGAGGAAGAAAAAATTCACAGGCAACATACTTTCCATGGCTGA  
AAGAAGGTTCTCTTGGAATAGCTGTTTCTTCTAGTATAGAAGTCACTGTGGAGGAAAACTGAGTGCTGATC  
TTTCCATTTGATTCCATGGCACTCCTGAAGATATGAAGGTAAAAAAGGCCATTGAGTATAGCATTAAACATCGG

CAGAAATCTTTGCAACAAGCTGCACTAGGAATCAGGAAAAATTGAGTGATGAAAGGGTGTAATGAAGTAA  
 CACCAACTGAAGGAAGGATCTTTACTTACATCCATAAAGGAATAAGAATGCTTTGATACTTCTGAATTCACCT  
 CGCTAAAAGCTAGCTGAGAATTTTCATTAAGTTCTTGGGCCGAAACAGCTAAATTCTGAATATCAGAGCTATA  
 CTTGTCTTTTCAGCTTCTGGAGCTGAGTCTTTAACTCATCTGTAGCCTGCCGTTAAATTCAAGAAAGATTGGTAC  
 TGTTTGCAGGTTGCATATAATGAAAGTACCATATGTCAAAGATTTTTTACTGTACCCTCCTTTTAGTAGCTAAG  
 AAGGATTGTGTATCTTCTAATATTACATTCAATTGCTGCTCTTGTGTTGTTACAGAACTGCAGTGTCTCTTT  
 AAACCTTCAAGTTGCTGAGTTAATTTGTTGCGGAAATTTTGCACGAGAATTTTGTCTCTCTCCTCCTATTGTTG  
 CTTTTCTCTATTTTATAAGAAACATATGTTAGAAGAAGAAAGATGCTAGCCAGATAAAGATCATAAGAAATA  
 GTAAGACGAACCAATTTTGGCGAACAAGGTGGATATCTCTGATTCTGCATTCTCTACTTCAGCTCGAAGCTCA  
 AGTGCTTTGTGTCAGTCATTGCCTTTTCTA

>TCONS\_00002156

CTGCACTATCCGTTTGAGGACATTCTGGTAAATTGACGCTCCCCGCGCACGTCTCCCGGTGTTCGAATAAATA  
 TTGTTTCCCTGGAAAATCAAATGGTAGTTTCCACTTTCCACCACCGTCCCTTCTCAGTTTTCAATTGCTTTCCG  
 CCGATGAATTACGAGCAGAGACTAATCGCCGCATCGAAGTTCGTCTACGCCGGCGACTCAGCCGACGATTCT  
 CTGCCGGTCAACACTGTTGACTTGGGAGTTAAAGCGACTCTTAAACCTCACCAAATTGAAGGAGTCTCATGGC  
 TTATTCGAAGATACCGTCTAGGCGTCAACGTCATTCTCGGTTCCATGGAGTTATGCAATAATTGACGAAGCAC  
 AAAGGCTCAAAAATCCATCTAGTGTATGTCTGGAATCTTCTTTTACATAAAAATGCAACTGAGATATCACACC  
 TGATCTTGGTATGAGATAGAATATTGACTACTTATGTAGTCACGATGTGTGCTCATGGTCTGCTGAAGTTAATT  
 CCGTATACTACCTTTAAATTTGTATTAATACTAAATGCCTCTTTGAGGGTAAATAGGTGATATCTCTTCAATATCC  
 TTATTACTTCGAAAATAAAGTTCTTCCAAATTTCTTGAAATGC

>TCONS\_00002232

TATATATATATTTCACTAGAGGGATAAGAAAACCTTTGTTATTGTGCAAGATATAATCATAGAGCAAATATTAT  
 GTGTAGCCATAATACATTTATATTTGTCCAAGTTCAGTGACTTTTAAGACAATTGTTAGTTATCTTCTCACCCG  
 CACATGTACTCTACGTATCTCCGATACTTAAGAATTATACGATGACTAATCCAACCTTCTCGACCTGCTCAGG  
 TACCCATACCCTTTTCCATGTAAAACAGTCTGGAAATATCTAACAAAAGAGCAAATAGTCAACTTATCATACC  
 TGTGTCTTCTGTCAGGGCCTTTTGCAGTGCTTCCAGTTCAATTAATCTGTCTTCCACTTCTGAGTTTTGGTCAT  
 AGAAAACCGCAGCTTTCCCACTTCGACTTGCAGATGGTCAAAAACCTCTTTGTTCAATC

>TCONS\_00002321

CCATCACATTAAATCAACTGTCATCTGCACTTGGCTGCTCTTGTTCTAATTTTCTCTACCGCATTCTGAGGTTCT  
 TGATTAATAGGGGAATATTCAAAGAAGAATCCACAGGACATGGCGAAATAGGTTATGTCCAAACACCTCTTT  
 CTCGTTTGTTGAGGAAAGATGGAGAAAATAGCATGGCTGCTCTTGTCTACTTGAAGCTAGCCCAGTGATGCT  
 CGCGCCATGGCATTTTTTGAGTGCCCGCGCTCTGGCAAAAGGGAATACTGCAGCATTAGTGCAGTTCATGG

>TCONS\_00002405

GGGAATCTTGATCTCCCTATACAAATTAGGAATTTCAATTAGCTTAACCCTAACCCGAAAAATAAGATCCCTA  
 ATTTTGTTGGATTTGGATACAGAGGGAGAAATAGAGACATTCAAATGTGAAATTAGTCCATCGCAAGGAGAC  
 ATTCAAATTTGAAGATGATTTTTCCGATCGTTTGTCTCATCTCTTTCGCATCGCTTCTGAAGACGACGACATCT  
 ACGCCAGGTACGAATAGTGAGATTGTGGCACGTTCCCGACCGCGACAAACCAGACAACACCGTCTCCCTTGA  
 ATTAATTATTCAAGACGAAAAGGTGCATTCTTTTTGAAAAAACTTATTTTTT

>TCONS\_00002454

TCAATAAAGCTGACCGCCATTGCCATTACGCCATCACTCCAACCTTGATCACTCGGGAACTTGTGATTCCAAAT  
 GCTTCCTCCATTTCTTCACTTATAGATCTTCTTCTACTTCCCATTGCTAAATTTCTTCTTACTTTTCAAGATTCTA  
 CTAGGAATTTTCATTTTCTTTTGGTGTTTGGTACTTCTATGATCTGAGCTTCTCTCACACTCTTGTCTTGACCC

TTTAATCCTGCAATATCCATTATCATCTGTGTCCAGAAGTGTAATCAACTGATATGGATACTTGCTGTATGGCT  
TTGAAATCAACTGCCCATTGAGGAGAGCGAGCAAAGTTGGCTTTGAAAATGGTGACAAGGAGTTTTTGGGG  
GAGCAGATTAGAGGGAGTTTAAACAACAATAATCTCAGGGTTAATAATTTGTGCAAAAAGTTTGAAACTTGAG  
AAGAAGGAAAGCAAGATCAAACCTGGGGTTGCTTTCTCTGTTATCACTACAGAAAATGACAAAGAGACTTTG  
GTAAAAATCATTCTTTTTATTCTTTGGGACATG

>TCONS\_00002543

GCAAACACCAATTCAAAGGGGAGAACATGCTTCATTCTGAACGGAAATTTATCCAAAGAAGAAAAGGAAGT  
GGCTATGTTTACCATCGAGGAGCTGAAAGATACAAAAATCTTCATGTTGGCCTTAGTTCCATATGAAGCATA  
TAAAAATCATCTTCTACATGTTTCAGCAGGTTGAGAGGGCTGAGCCATTGAAAGTAGCTTGTATCGGTGTCCT  
AGATAGAATGCTGTCAGTATCCACATGAAGCAGACAGGTAGGGCATATAGAGAAACAGCTGATGCCTTGCC  
ATTGAGAGTGCTGAAGAGTAGCTTGTACATTCCAGCTGCTGTAGCATCTCCAAGTCTTTGAACAATCACATCT  
ATGCATACCTTTGCTTTATACTTCTCATCCTGTGAGACAACAGTAAAAAGAAGCTCCCTTCCAGGCCTGGTAA  
CAACCTACTTATCTTTTTTTTCATTGCAAAACCTGTTAGTTCCCTGTTAAACTAAAAAGGTAGAATACCTCATT  
CCTCCCTGTACTTGGCACGGTTTATTTAGCGCACACGGCACACCTAACTTCACATATTTCCAGTTACCC

>TCONS\_00002564

TGAGTTGCAACAAGTGCCTCTTCCTGTGTTACCCACCTACCTAAAACATCTGTATAATAGAAGCCAGAGTTAG  
GATCATAGTGACATCCATTACTTTGATTGTAATAATAGCCTGATGAGCTGTCATACTCCCACTCTTCAGATACA  
GCTGATCCCTTGGCAGTCGCTTGACCATTATCATGAGTAACCAATGCCTGTATGTTGGTACTTCTGGCCTCTTT  
AACTCGAGCCATATCCTTCTGATAGCTGCATTGGGCTTTTGCTTCAATTTGCTCCAGTGCACGGGGCTGCTTCTTT  
TAAATCTTTATCTTTTGAGCTTTTCTTGTGCGCATCGTGTGAGCCTATTGGCAACATTTTCCTTGTGACGTGTC  
CCAAGGTCATGATTCCTAATGCTCGTAGGATTATTTGATATGAAGATTTTGAGAAATCGCACCATTTATTTCC  
TTGGCTAACCCAAAACCTCAGTCATGGCTGCAACGGATATACAAATGGATTGAATGCCAAGAGAACGGGAAG  
GAACGGAGATTCCCAGGCTCAAATTTGTTTCCCTATTCAAATCAACGGCCTTTTCTTCTAAACCCTACTCTTG  
AACAAAAGCGGTAA

>TCONS\_00002565

TGAGTTGCAACAAGTGCCTCTTCCTGTGTTACCCACCTACCTAAAACATCTGTATAATAGAAGCCAGAGTTAG  
GATCATAGTGACATCCATTACTTTGATTGTAATAATAGCCTGATGAGCTGTCATACTCCCACTCTTCAGATACA  
GCTGATCCCTTGGCAGTCGCTTGACCATTATCATGAGTAACCAATGCCTGTATGTTGGTACTTCTGGCCTCTTT  
AACTCGAGCCATATCCTTCTGATAGCTGCATTGGGCTTTTGCTTCAATTTGCTCCAGTGCACGGGGCTGCTTCTTT  
TAAATCTTTATCTTTTGAGCTTTTCTTGTGCGCATCGTGTGAGCCTATTGGCAACATTTTCCTTGTGACGTGTC  
CCAAGGTCATGATTCCTAATGCTCGTAGGATTATTTGATATGAAGATTTTGAGAAATCGCACCATTTATTTCC  
TTGGCTAACCCAAAACCTCAGTCATGGCTGCAACGGATATACAAATGGATTGAATGCCAAGAGAACG

>TCONS\_00002572

TTTCACTCCTCTCATTTTGTACTAACGGTGGTTTCGTACAGGTTTAAGATCTGCTGCAAAGCATCCCATATCTT  
CAGACATTCTTCACCTACAGAGTAGGATATAGACAGCTCACTGACTGTTGAAGACTCCGCCTAGTCACCAGC  
AATTGTTCTCCAGATTTTGGTTGATTATATACTTTTCATACCATTAGCAAGAAGCAAAAGTGGCAT

>TCONS\_00002577

ATTAGGCCTTGGACTGATTAAGGAAAGAGACCAACTTTTTTCAGCACGACCATAGCATTTTCACTCGTAGGAGC  
AAACAAATGAAACACATGTTCTTCATCCTTAATCTCCACAACCTCTACTGTCCCTTGCCACCCACTCTTCTCTA  
GTAACCTCTTATAGTACAATCCCTGTATTTCAACGGATCTTTTCCAGCAACATAAACAAGTACTTTATCACAC  
CCTAAGCTAGACAATTTCCGATCCTTTTCCGGGTTCATCAACGGGTATCTAATCCGGAGCTATTTGGATGCG  
CAAAAGCCCAGAGCTTCTCAATGTAATTTTTGCAATCCAAGTTTTTCAGCCTCGCCGTCAATTAAATCAATCCC

CCAGAAATACGGACAGGCTAAAAAAATCCCATCAAGTTTGACGCCATCCAACTTTTCCAACCCGACCCGAAT  
 TGCTATATTATGAGCAATATTAGCTCCAGCGCTATCTCCACCAAAATAAACGTGATTAAAATCAGCGTGGTCT  
 TTTAGCCATGGCTCATGACCTTCACCTTTAGTATGTGAAGCGACCCATTTGAGAGCTACCCAGGAATCTTCAT  
 AAGCTATGGGTAATGGGTATTCAGGAGCTAACCTGTAGTTAACAGAAACGATTATAACATTGGCTTTAGTTGC  
 TACCAAATTAAGATGCTTGTGGTATGAAGGTGAAGAAGCAGATTCAATCACAAAGCCGCCGCCATGAAAGT  
 AGACGAAAAGGGGAATTTTTTGAACCGGGTCGAGATTTTTGGGCAGGATCCAATTCAGCTGGGACAACGCCT  
 TCGCCCATCAACCTCTCGATTGGGCCATCTTTGTAAACTCTGATCAATGGGAAAAGGTCATGTACTATTTCCGC  
 CATTGCTGAAAGCTAAGTTGC

>TCONS\_00002625

AATGCAAACCACGAATCAAGAACTCAGCCAAGGGAACACTTTGGGAGATGTCGGCAGGCGTGCTGTGAGTA  
 CTTCAACTCCAGTCTCTGTGACCAGGAGAGTGTGTTCAAACCTGAGCACTTCGTTTCCCATCTGCTGTCACAGC  
 AGTCCATCCATCAGGCCACATGCGATCACGCCAAACACCAGCATTAAATCATAGGTTCAATTGTAAAAGTTTG  
 GCCAGCTTTCATAACGCCAACTGCTTTGTTTCTTGAATAATGTGGAATGTTTGGTGCGCAATGGAAAAGTTCTC  
 CAATGCCATGACCACAATATGACTTCACCACAGATAAGCCAGACATTGAAGCATGTCGATTGATGACCTCCC  
 CAATTTCCCGAAACCGTACCCCAGGCTTAACAATTGATATTGCTTTCTCCAAACACTCATATGTGCACTGGAC  
 TAACCGTTGAGATGCTTCATCAACATTACCAACAAAGAAGGTTTCATTGAGATCACCATGAACCCCTTTGTAA  
 TATACAGTAACATCAACATTTACAATATCACCATCCTCTAATTTCTTGCATCTGGAATCCCATGGCAGATAA  
 CTTCAATTGACTGACGTGCAGCATGACTTGGGGAAAAAGTGATAATTCAACGGAGATGGATATGCACCAGCGG  
 CAACAGTAGCCTCATGCACCACCGCATCAATTTATCAGTTGTCACGCCAGGCCGAATAATACGAGCCGCTG  
 CATCCAGAACTTCCCTTGCTATTTCGGCATGTTTCTCTCATCCTCGCAATCAGCTCTGGAGTTTTGATCTCAACG  
 ACATGCTGTAAATCACTATTGGGTTCAATTTTTGGGATACCATCATTTGCCCAATCAGGTTGATCGATATGATC  
 AGGTACAAGACGCTTTTTTTGATATCGGATAGGGCCTTAGCGTCCTGAAAGAAGGCGGCACCATAGGTTTTTAG  
 ACAACAAACATTAGCAGCAACTTTGTAGGAACATAAGAGAAAA

>TCONS\_00002626

AATGCAAACCACGAATCAAGAACTCAGCCAAGGGAACACTTTGGGAGATGTCGGCAGGCGTGCTGTGAGTA  
 CTTCAACTCCAGTCTCTGTGACCAGGAGAGTGTGTTCAAACCTGAGCACTTCGTTTCCCATCTGCTGTCACAGC  
 AGTCCATCCATCAGGCCACATGCGATCACGCCAAACACCAGCATTAAATCATAGGTTCAATTGTAAAAGTTTG  
 GCCAGCTTTCATAACGCCAACTGCTTTGTTTCTTGAATAATGTGGAATGTTTGGTGCGCAATGGAAAAGTTCTC  
 CAATGCCATGACCACAATATGACTTCACCACAGATAAGCCAGACATTGAAGCATGTCGATTGATGACCTCCC  
 CAATTTCCCGAAACCGTACCCCAGGCTTAACAATTGATATTGCTTTCTCCAAACACTCATATGTGCACTGGAC  
 TAACCGTTGAGATGCTTCATCAACATTACCAACAAAGAAGGTTTCATTGAGATCACCATGAACCCCTTTGTAA  
 TATACAGTAACATCAACATTTACAATATCACCATCCTCTAATTTCTTGCATCTGGAATCCCATGGCAGATAA  
 CTTCAATTGACTGACCTACGTGCAGCATGACTTGGGGAAAAAGTGATAATTCAACGGAGATGGATATGCACCA  
 GCGGCAACAGTAGCCTCATGCACCACCGCATCAATTTATCAGTTGTCACGCCAGGCCGAATAATACGAGCC  
 GCTGCATCCAGAACTTCCCTTGCTATTTCGGCATGTTTCTCTCATCCTCGCAATCAGCTCTGGAGTTTTGATCTCA  
 ACGACATGCTGTAAATCACTATTGGGTTCAATTTTTGGGATACCATCATTTGCCCAATCAGGTTGATCGATATG  
 ATCAGGTACAAGACGCTTTTTTTGATATCGGATAGGGCCTTAGCGTCCTGAAAGAAGGCGGCACCATAGGTTTT  
 TAGACAACAAACATTAGCAGCAACTTTGTAGGAACATAAGAGAAAA

>TCONS\_00002765

CATCACAGCCGACACAATCCAAAAAGCGTCCTGGACGTGAGTGTCCGCAACATTGGACAGTTGATGCAATAG  
 CCACGATTCTGTTTTAAGACAACCTGAGTTAAATGCACGAGCATATGTTTATAGTTCTATTGGAAAGAAGTGGA

G TTCAGGAAGGCAAAGGTTGTGGTATGAGTTCAATGACCCACTTAAGACCAAAGCAGAAATTATGGATAATG  
TTCCATCAG

>TCONS\_00002769

CGCCACCTTCTTCCGAATATCTTCATTCCTATTCTTGTCTATCCTAGTGTGCCCCGCACATCCACCTCAGCATCT  
GCATCTCTGCTACTTTTCATCCTCTGGATATGGGAGTTCTTAACCGGCCAACACTCTGCCCCATACAACATGGC  
CGGTCTAACCACAACCTCTATAAACTTACCTTTGAGTATCAGTGGCACTTTCTTGTACACAAGACTCCAGAT  
GCAAGCCTCCATTTTCAT

>TCONS\_00002934

TAGGTGCAATTATTCCACCTTTGACATAATAAGTGGAGCACATAGCTAGAATTATCTCTGCAGCACCCCTTCCA  
ATGTCTTACGGACCATTGCATGATCCAGCATCATTCTTCTCATAGAATATGCCAAAGTTAGCGTAACAGCCAA  
TGGCAGACCTTCTGGAATTGCAACCACTATGATGGTTACTGCTGCAGCAATCATACGAACCAAAGAATTCAT  
GATATCACCTGCTTTGGTTTTGCTTCCTATGAACTCCCGACGACTATTGTCATATT

>TCONS\_00002935

TAGGTGCAATTATTCCACCTTTGACATAATAAGTGGAGCACATAGCTAGAATTATCTCTGCAGCACCCCTTCCA  
ATGTATAGCTTACGGACCATTGCATGATCCAGCATCATTCTTCTCATAGAATATGCCAAAGTTAGCGTAACAG  
CCAATGGCAGACCTTCTGGAATTGCAACCACTATGATGGTTACTGCTGCAGCAATCATACGAACCAAAGAAT  
TCATGATATCACCTGCTTTGGTTTTGCTTCCTATGAACTCCCGACGACTATTGTCATATT

>TCONS\_00002988

GGCTGCTTCAACGAATTTAACGTCTTATTTATTGGTGTCCGTCAACAGGTCTCGTCATATTCAGCCCTAGCTCG  
TGGAGCTTTAATCCACAGGGACCAAAAAGGGAGGGACCTCGAAACATCTTTCTTTGCCGTTTTAGTCCTCAACC  
TTTTTGAAATCTTAACCCCAGATTCCCTGTCAATACTGTTTCTTGAATTCTTTCCCTCCTCTTCAAAAAGATTCC  
AATTTTCTCTGTTACTTTAGATCCCTAATTCCTTCACTCAGATTAACACCCACCATATCTTTTATTTATTTATTTA  
TTTATTTTGTTCGCATTCCGGCTGCTGTAATTGAACCAAGCAGTCACCTGTGAAGTTTCTGCAAAATTAACGTTT  
AGGGTCTTTTTTGTAGTTTCTAAGTTGGAGAGGGGAAAATAAATAAGGAAGTTGAATGTGTATGCAAGAAATT  
GAAGAGTAAATTTGAAGACCTAGAACTTGCTGTTGCGTCCGATATGAAGCAGTTGTGGGACGCAAAACTGA  
CTGTTTCATGCTGTGAAAACCTGAAGTTTGATATTGGTGTTCCTGCTCTGAGGTTTGAGGAAATTTTGTTCGG  
AAACTGTTTGAATTCCTTTTCATCAGTGGACCGGTACTAGGTAACCTCTGTGCACCAAGGTTTGGGCAAATGGGG  
AAGAAGTCACCTAACATTTTTGCCTCCACTGGATTTGAGCC

>TCONS\_00003083

GTACCTCTCCATCGTCGCCAATATATCAGATGAAAACAAATACCCTGTTCCATCCAAGGAAGAGTAAACAGC  
TCGAGGAGCTATGGAGTAGAGGAGGATAAGGGCATCATTGGTATTTCTCCTCAGTGAATATGTTCTCTATACAC  
CATGAAAGGGCGTAGGTGCTCTCCTCGCTCTCATCAACGGCCACCAAGATCTTCCGCGCCTTTGCTGCCACGT  
CAGCCATCCCAATATTTGACCGCACAAAGATGATTGATTGAAGAAATTTGAGTGTCTTTGGACTTTTAGCTG  
AAAATGGAAAGTGAGGGAATCAATTGAAGATATTTATAGCG

>TCONS\_00003400

ATTCTTTTTGCTTCAATTGCCAACCTCACTTGCGTCTTCAGACCAGCATATGAGAAGTTGCAATCCTTGTGTTGT  
TTCATAGGGACTTTAAATTTGACAGATTTGGCATTTCCTTCTCGAGCTAGCTCCTCCACAGCGGGGCCCCCACT  
CCTCCTCAAATCAAGACCAAGCCATTTGCTGTTTTGTTCATATGCCTCGCCAATTGCATCATCAACTGTTGTCC  
CAAGTTGTATATAATGGCCAAGATCACGTGCAAGGATTAGAAGGTTATGCCCTCCTGAGACAAGTAGGGCCA  
TGAAAGGAAACTGCAACTCTCTTTCCACTAACCTGGCAACCAGAGTATGAGCTTCCATGTGATGGACACCGA  
CAAGAGGTAAATTATGAGAACCAGCAACTTTTCTTGCTTTCTGCACACCAACTCGCAGACAAAGGCTTAAAC  
CAGGACCAATGGTGACAGCAACTGCAGTTAGATCCTTTTCAGTCAGATTAGCTTTATCTAGCGCTTCTTGTACC

ACCTGATCAATCACCAGTGCATGTGCTTCCTCTGCCATCTTAGGAGCAACTCCTCCATATCGAGCAAGCAGTT  
CTGCCTGAGAAGAGATAAACTTGGCTGAGAATTTACCATTGCTATTTACCACAGCGGCAGCAGTATCATCAC  
AGCTAGTTTCAATGCCCAAAACAATAAATTCTCATTTTCTC

>TCONS\_00003401

TCTTCATCGGAAGCTGAAGCAAGAGAGATTTACGCATTGCTGCATACAAGATTCTTTTTGCTTCAATTGCCAA  
CCTCACTTGCGTCTTCAGACCAGCATATGAGAAGTTGCAATCCTTGTTGTTTCATAGGGACTTTAAATTTGA  
CAGATTTGGCATTTCCTTCTCGAGCTAGCTCCTCCACAGCGGGGCCCCCACTCCTCCTCAAATCAAGACCAAG  
CCATTTTGCTGTTTTGTCATATGCCTCGCCAATTGCATCATCAACTGTTGTCCCAAGTTGTATATAATGGCCAA  
GATCACGTGCAAGGATTAGAAGGTTATGCCCTCCTGAGACAAGTAGGGCCATGAAAGGAAACTGCAACTCTC  
TTTCCACTAACCTCGCAGACAAAGGCTTAAACCAGGACCAATGGTGACAGCAACTGCAGTTAGATCCTTTTC  
AGTCAGATTAGCTTTATCTAGCGCTTCTTGTACCACCTGATCAATCACCAGTGCATGTGCTTCCTCTGCCATCT  
TAGGAGCAACTCCTCCATATCGAGCAAGCAGTTCTGCCTGAGAAGAGATAAACTTGGCTGAGAATTTACCAT  
TGCTATTTACCACAGCGGCAGCAGTATCATCACAGCTAGTTTCAATGCCCAAAACAATAAATTCTCATTTTC  
TC

>TCONS\_00003505

CAGCCTGGATATGCATGACTAGCAAGTACACAAAATAACAAGGTTTCTCTCCAAAAGCAAGGTAATCCAAG  
CCCCGGAAAACCTTTCCAGGCTTATTTTATTATATATTGCATTCCTTCAGTTTCCTATGACTACCAGCTGTGTTAG  
CAGGTTGCAGAAGCTATTAATAGATGAAGTACCCGACCACTGCAAAAATAACAATACTGCTAAATGAAAAG  
TTTAATAAGGTGTCAAGCAGCCTCAAGTCTTTCTGTGTTGTCAAGCGAATAGACATCCATAGCAAGATGAGA  
ACGATGGCTGGTCATAACTGGCGGAAATGAAGCTTCAATACTTGCTTATCTGCCAAGACTCTTTCTTCAGGG  
TATACAAAATGCTCAACTAGCACCTGAAAGCTCCATCCATCTAGTGAACAGACCTCATGCTACTCCAAACG  
TTTGAAGCCTGTCACAGTGAGGAGTTGGGTACTTCCTGTTCCATTGTCGCCTTTGGAGTTCTATATGACAGTAA  
CGACCAAGCATATTTTTGTAATCCCTGATAACATGGTCTTCAATGTTTTCTCGAGCAGGACTATCAAGAGGAT  
ATTTCTGATCAAATTCAGGCGATTTAACAATAATTCTACTCCATGTTCTTCTGTAATCTTCCTAAACTGATATT  
GGTAGTTCTTCTGCAAAGAATACTCAGGCTCCGAGAAAGGAAGATAAGCAAGTAAGATGATAAGCAAAAAT  
GGTAATAACTGAAGGAGGAGAAGCAAGTTAGGCCCAGTGGAACCTAAATCCTCTCTCTGTGGAGCAGCATT  
GTTCTTGTCTGTAAACATGAGATGTCCTAAACATATCAGAACGACCAAAAAATGCCCTGAAAATCTCGTCA  
GGATCAAAATCATCATCATAATAGCTGTGCCCAGTTCTCCTCCTGCGTCTAACATTATGCTGCTGATTATACTC  
AAATTCCTCAGCCAAACCAGTCTGGTCATACTGCCTCCTGGAATCATCATCACTCAAACACTTAAACGCCTTA  
GAGACTTTCTTAAACGCCTCTTCAGAGCCCGGAGCCTTATTTTTGTCAGGATGAACTTTCAATGACAGTTTTCT  
GTATGCTTTCTGATCTCCTCAACTGAACTACCCTTCTCTAGACCAAGAATAGCGTAATAGTCCTTCTTAGTCT  
TAATTTGCCTAATCAACTGCACGTGTTCTTCTGTATAGTTCCTCTCCCCGTCAGATACATCATCAGACTTGACA  
CGACTCGTGACATTATTCACATTTTCAACATTTCTAACCTCACTTGAGGACCCAGCAGCTGACGACTCCAGAT  
TTTCAACAAGCAGCCAAAAGATCTTCTACAGATAAATTACTGTTAAGGCGCCGTGCAATTCTAATAAACTTGAG  
CGCTCTCTGCTTATTGCCAGATGCAATTGCATCCTTGGAATACCAATGCATTTTAAAGCCTCATCCTTGTTAC  
TATCCATCTTATCGTTCAAAT

>TCONS\_00003598

TAATCTATAACCAAAAGGCAATTAGCAAACCTGGTTATTAGATGGTGCTACATTGGCAGAGTCATCAATGCCG  
CTGCTAGACGGGCCTTAGTAGCAAGGTCATAATCCAGCTCACTGGAGATCCCAGGTTTGAATCTCAACTACA  
ACATTTTGTGTTACTCCAGCTCCAGCCTTGATGATCAAGATTACCTTGGCAACTTGTGTTTGTGGCTGGACAA  
GAGCCTGGTGGATTAGTCAAGCTGACCTGACAACACCGATGTAAGAAAAGAG

>TCONS\_00003615

GGGATGCTGGTGCATATTCGCCAATCTTTTGATTCTGTTGACCTTTGTGCATGTATAAATCAGACTTGGAGAAG  
AGAGGTTGTGCATATGCACTGGCTTTTCGACTTGTATGCATCTGTGGTCAACCATGTTTTCTGGAAATTGTTAG  
GTTTCCTTGTTTGGTGAGGATTCTGGGGAGATCTGTAAGAGGAGGCTTGTAGTATGTC

>TCONS\_00003750

TGACCAAGCCCAAATCAAACCCGTTCAAGTTGGAACACTCGGGTCCCGGAATTTACCAAAAACCCTAAACCCT  
AGAATCTGGAATCCAAACCAATTTCTATTCCACAATTACACCAAAAACCCTAAACCCAGGTATGCAACTCGCA  
AATCGGCTTGTCTATTTACTCGGAAGCTCAAATCGGAAACCCGATGAATTTAGGGGTTTCACGCAATTCACAG  
CATCAATCTCAAGCCTTAAAGTAGCATGGCGCAAGGACTCAAAGCTAGACCAAGCAATCGAAAACGACAAA  
AAATGGAAGCATTGTGCAAGAGTTGTTAAAGAAGTGCTAAACGAACCGGGTCAGGCATCTGTAGTTCAATGT  
CGATAGCTGCATTAGAAGGGAGATTTGAGCATCAAGGATGAAGAATTCATAATAAATTCGAGTAATATGGAT  
TATGCTATTCTGTGGTCGACCTGCAATTATAACGTGCCTTGTAACGAGGTGTCAGCCTCGCATAAACTCAGT  
TCATAATGAGAGATGATGACTACCAAACGCCAATCCTGGAAGTGGAGCTAATCTGATGTGATAAAATCATTG  
ATCATACCAAATTAGCAAAATTGCTGAAGATTGCAGTTTCTCAATAATAATTGCATTGTGGACTGCTCCATA  
GGGCATGACAGGGGAGCACATGCTAATTATCTAGCCAATTGGTGATTGAACGGATGAAAGAGGTGGACAAT  
ACGATGACCGGACAATAGTTATGTTTCGTGGAGCAAGGGACGTGGTTGGAACTTATGGGCCTAATGATAAC  
TGCAGGGGATGTTTAATGTGATGTAAATTTTCAGTATAAGCATCATGCAGACCGAGAACAGGCTACAGATGC  
TAATTTCTTTGTAAGATAAGTCTGGTGCAATGGAGTTAATCATGATCAGTATATATTCATCTTCCTTTCCTGAA  
ATTCCGAGCACCTTCCCTTATGCCAAAAAAAATAGTAAGGGACAGGGAAATGGTATAGTTTGTACTTTGT  
ACTAATCTTTGACACTAGTGTGACTTTGTTCCCTCTAGTTTGGTTAATATTCGGATCTCCCTCTATTGTTGGATTG  
AGGCGTATTCGTTTTTGTGTTGTAGTTATTGAGATCTCCGTCTAAACTTTTCCTTTGTGAGGATAATATGCAC  
TGTTTGGATTTCTGTCATCATAGCTACCAGAACTATCTCATATCTTTGCTTCCAAGTTTCTTTAAAGTA  
GAGTAATATTTTGTGATCTCAAATTGTTAGAGGAGTTCCAATTTGTAATTTAACTTCGTAAAGATATTGTTAG  
GGCTGGACTTAGCTGCAGTTACCTCTTGGTGTTGGAAGTATATTATGCTTATAGGAACTCCTTGATCCTGCTAT  
ACATCATTTCTTTTTCTTTTCCAAATTTTGTCCATAATTTTTTGCAACAACTGGCCAAGCTTATATATTAAGG  
GGTTTACCGATGGATTGCAGCACACATTTGTACCTCAGCAATGTTGACCTATGTTGGGTCTGTGCAGGAAATA  
AACAGTCATGTTTGTATAATCTACGTTTTGTATCACAAGGCTTAAAATAAGTGTGAGATTAATTCTCGCTCTCC

>TCONS\_00003850

ATGAACACTGCTATATCTAGACATTACTGAAGGCACATTTTACATCAGACGACCAGTATGTAACAACCTTTGC  
TAAAACATAAGGCACGATAAAGTATAATCACACGATATACATATAGAAATGAACATAATACGAAGAGATAA  
AGAACAAAACATCATTCTGTAACCTTCACGCCGGTTAGGTAGACTTGGCACTGGATCACACTGCCGCCGATA  
TAGAAACCAGGCATAACCATCAGACCAACCTTAGGCTTCTCCTCATTTTCATCTACGATAAAATTCTTCAGAA  
CACTTTCCATATAAACCTCTGAGAACTCACTTCCCTTCTTGACTTGAAATACTCTAACCGGAGGATCAAATGA  
ATATGCCAACCTATGCAGAAGCCAAATTGACTTGGCTAGTTTCAGAAAAGCCTGGTAGAAAGCTGTTCTTGG  
GTGCCCCGCCACCCATAACGTAGTTTCGCTGATCCAAGTTCCCAAAGAATGAAGCCTCCATCTTTTGATGAACC  
ACCACTATATATTTGCTCCGGCAGAAGTTCCCAAAAAGGGAATCTGGACTTTGGCCTACAGCATCCAGTGGA  
TCCATTTACGTAATGCAAGATACTGGTGGAaaaaactATCCTTGGTGACAGCTGAATTCTCATGTTTCACAG  
AGAAGAACTCGTCCTGAAATCCGGTGAACATTCTTTGGCAGATATGTGACTCAAACGCATACTTCTTGTGAGC  
TCTCTTTGCATAAGCTATATCTGGCTCTATGGAGTTTGTGTCAGCATCAAGATCCCAACCAGCAACTTTTCATCA  
TGTTGATCAATGGCTTAGAGAAGTCGTGAATGGCCCTGTAAGCAGCTTCCACAGCTGACCTGAAAAGCTCAG  
GTGTTAGGTCCATGACGAAAAGCCCGTTCTCGTCAACTGCATTTTCTGATTCTTTGGCTGACAAGCCCCTGAGC  
TTAAGGTTTTTCTCCAATTTGACCCGCTTCTGATTGGCCTCTTGTATCTGATGCTGCAGCTGACCAATCTCAGA  
ATCTTTATTCTGAATCTCAGATTGAACTTCTTCACCATAACTTCATATGTTTTCAACAACTCTGCTGTTCTTG



GATCTCTGCAGCCAAGCGAGAGTCCTGAGGTGAAACACACACAGGTTTGGGATTGTGCTCCCTGTAGAAGTG  
 CTTGAGTTCAGAGAGAGTCTTCAGCTCCGAAATTACAAGTTTATCGGCAGCTTGGATTTTATCCGGGTCTGAT  
 GGAGTATGAGCAGATTGGAGTTGAATGTAGGCAGACTTCAGGGAAGAGATATTTGTGAAAATCCTAGATACC  
 ATAGCTTCAACTGCTTCAGGATTTTGGTTTGCGGCTTCCTCCATAGGTTGTGGATGGACTTTTTGGCTGTTGCTC  
 TCGCGGAGTTGTGTATCTTTTGCACCACTGGGTTGCATAGCTACTTGTAAATGCGATAAGATTAATCAAAGCCC  
 AAACCCTAAAAGATTGTGGTGATTAACCTGTAAAACCCAAACCCTGTCAGAGATGCGTGAAATAATCAAAA  
 ACAGGCAAATAAGAATTTCCAAACATCTAACAGTTGCAGTGTCCAGAAAAATCTAAGAAAACTACAGAGCG  
 ATGACTGAAGGTGTCCAACATACATAATAACCTTAACACTGATCGGAGATCCAGCTGACGAGTTACCGGAAT  
 TGAAGAGCAGAGTTAAAGCTGTGGTGGTGGCGTTGGAGTTTCCGACAATATCTCAAACCTTGGAAGCATC  
 TTTGTTTGTCTGTTCTTTTAACTTTTCGGTGGTAGCACGCCTGCTGGATTGGTGCTTTC

>TCONS\_00003971

CGGGTCTTGACAGCTGATTCAAGTTAATCATAAAGTATCTTATAGCTCACTACAATATCACAGACACTCAGTA  
 ACGATACTTGGTAGAGTAATCTTTAGGTGCAATAACTAGACCACGACCCTTTCTCGCGCCACGGTACACTGTC  
 TCAACAATATCAATGAACTCTTGTTTATCTTTGAGAGCCCAGTTGATCTTGTTATTGTTTCTGTGCCAAGATC  
 AATCATGATGTGCTTGTTTCTGAAGAAGAACATGATGGTGGATGGATCGTACAACCTACATATTGTGTTAAAA  
 TCAGGGACCTCCGTGATGTCCACCAGGTATATGACAGCAAAATTCTTTAATGTATCTGCAACTGAAGCCAGC  
 ACCTCGTCCATCTGCATGCAAGTTTCGTCCCAGTCATGGCCGAAGCGGATAATGACGAGGCGTTCCTCTTCTG  
 CGAGAATGGCCTGATCCACCGCCCATCCCGAGTGAAGGTGAGGCAGCAAGTACGACATCTTCTCTGATCGC  
 TAGGATAGCAAGGGAAAAGTAGCTCAA

>TCONS\_00004098

GACTTCACAAGTTCATACGTTGAGAAGAACTGTACAAGTAGCCATTGTAGTATATAACCTATGCCTTCGCCTT  
 ACAAGTTAAAATACTATCTCATCTATCAACTTTCATACACATTTTTGCAGGCCACTGTAGTATATAACCTATGC  
 CTTTATCTCATTTAACTATTTCTACGGCATTAAAGTTACTCTGCCTAAGTCAGAAAGGATGTCTACCT

>TCONS\_00004160

AGGTTGACTGTAGAATTTTTTGGTGGTCATGGTCCGTATTAAGTGTGGTTCTGTTAGTAATTGCAGGGAATTGT  
 ATTCAGTCCCCTTCTTTCAATCAGAAAATATGTGAGTGCAGTGCAGCCGTGAACAAGGTCCCGACCAGAG  
 GAAGGGTGGTTTACTTTGGGCAGCATTGCAGGCAGTCTCTACTGGTTACCAAGCCGCTTTTTTCGCCCGGTTG  
 ATGTAAATACGATTAAGCTTGAGATGCTTGATGGAGGATGTTGTGTCTAGAGTGTTATAAAGAAGTTATTTTG  
 ACTGAGAAGCCTATAGTCGATAAATGACATCAACAACATTGGATTAGTAGTGTTTCAACTATATTGCGTAGGT  
 CCACATAACAACCTCAATTGGAACAAATTTCTAAAAAGATAGACTAATCGGAAGAGGGGAAAAAAGGGATTAC  
 TGTTAATTGCTACCACTAGTTTGAGCTGCCTTTTGTATATGACTTCATACGATCCTTTTTGAAATGGAAGTTGCT  
 TTACAAAGGGTACTCACATGGATAAATACTGCTCAATATGGGTATGCTTTGACTTCTACACAAATAAATAGAAA  
 TTAAGTCTAGTTGTTTAAAAA

>TCONS\_00004234

ATTATATGTAAGAACCATAGCATTTCGCGATTCAATTGGTAAATCTATTTTGATTCTCTATTAACCAATAATGTG  
 GAACTATTAACATGGTTAAAACAACTGTTTGAAGTCTAGACGCAGCATGGTACTCTTCTACCACTATGTTA  
 ATATAGAGGTGGTTTCAAATAAATATTTTATCGATATAGGATACTCATATTGATAAAATGATTTGAACCGC

>TCONS\_00004235

ATTATATGTAAGAACCATAGCATTTCGCGATTCAATTGGTAAATCTATTTTGATTCTCTATTAACCAATAATGTG  
 GAACTATTAACATGGTTAAAACAACTGTTTGAAGTCTAGACGCAGCATGGTACTCTTCTACCACTATGTTA  
 ATATAGAGGTGGTTTCAAATAAATATTTTATCGATATAGGATACTCATATTGATAAAATGATTTGAACCGCG

>TCONS\_00004271

CTTGCTTGCGGTTAAGCTTTCAATTCGGAAGAGGACATGCGAGTTCACCACATGTCACAGAACCAGTGGTCA  
AATCCAGATTGTTCTAATCATTGGATCAACCGCCACAAACGAAACGTCGTACATCGTACAGCTTATCTAAGTC  
GGTTATGTTTTCTCCTAGGATTCTGTGCGCGCCACGCAAAAAGTTCTTATCTTAGTCGGTTATCATCTTATATA  
TAGGCTTTATATTCCCTCAACTACAACACCAACTATTGAGATTCTACAATCTCAGCTGTCGCGTTGGCTGCTCT  
GATAAGATGGTCTCTCCTGCCTTCTTTGCCTCTAGAAAGTTTTTGGCTCAAAAAGCTGGAATGCAGACAAATT  
AAAATTCTTTGCGTGTTTGTCTGGATTTCCATATTGTAAGATGTCAATCAAGGTTATGTATTGAGAAGCGTGG  
AGAACATCCGTAGGAATTTGCTCATGTTGAATGAAGATGTAATAGGTATAATGGGGACATAAAAAGGCCTAAT  
TTCAGGGGGGTCAAGTCCCTTTTAAATTACTCTCTGTTACAACCTCTGGCCTTTGCCATGTCGGGTGCGCTCTCA  
TGGCAG

>TCONS\_00004521

AGAGTTAGCATAAGACCTTTATAACATCAAACCTGCATGGATTTCTTGTCCGGCCATTCTCTAGTTTTTTCTTCTT  
CACCCAAAGTTTCTGACATATATAACTTTGCAGATTGAACAAAGAGTTTTTTGACCATCTGCAAGTCGAAGTG  
GGAAAGCTGCGTTTTTCTATGACCAAACTCAGGAAGTGGAAGACAGATTAAATTGAACTGGAAGCACTGCA  
AAAGGCCCTGCAGGAAGCAACAGGTATGATAAGTTGACTATTTGCTCTTTTGTAGATATTTCCAGACTGTTTT  
ACATGGAAAAG

>TCONS\_00004715

GATTTAGTGCATCTAAAGAGAACAGGAACCACAGAGGAAGAAGGGACGTACCTGTACTCCTTGTTATTTATC  
CCATAAGAGACAGGCTCCATCTGCAGCTTTGTTGCAGTGCTTCCATAACTAAGTACATCTGAAGTAGCAACG  
GAATATAATGGCATGTTTTGGAACTACCGCTGCTATTACTTAGGAACTTCCAGTTCTATTGCTGCTCCCAGT  
AGTAATATGTGATATAGTAGTCGACAAGGACTGGGAAGTAGATTGAGATTCCACAGGCTTTCTTGAACGGTT  
ACGGCCTCGATGCATGTGCCGCTCACAATATTTTGAGTCAGGATGTGCATCTTTGGAGCACCTCCATTTCTTTT  
CATCAGTTCTTCTACATCTTCCTGGCTCAGGGTCAAACCTTCTTCCATAATAAGAACAATAACTCACTGGCAG  
AGATAGCATCAAACTCCTTCTAATTGGAATAACAAGGTCCGGTGGCACGGGCATCCCTGCCACTAAGTACT  
TGTATATCATTGCTTGATGCTCCAACCTCCTGCCACTGCACCGCCGTAAATGGTGGCCGGAATCCATAGTCATA  
T

>TCONS\_00004725

ATCTTTCCTTCTTAACTCCGTGTGCACTCAAACAACATTATATGAAATGGGACGGACGGAGTAGTTTGGGTT  
TGAGGGCTAATTGAGTGATAGTCAATTAAGGTCTTTTCCTAGCAGCTGCTTTACCTTAATGAACTAGAATCTAC  
AACGTGTAACGTTTTTCCCTTTTCTGACTATAGCACTAAGTTTTATGAAGCGAACACTTTAGTCTGTTGTTGGAT  
TGTTGCGTTAGCTCCTGATTAAATTTCTACAGTCTGATCACTAGACATTGTAGTTGCTGGAGTGGATTATGATT  
GACCTTCAAGTCGGGTGACATTAAAGTTATTTAGCAAATGATACTAGATGTAACCTTGAAATTAGAGAAGTAT  
GTTTAACGAGAATTTATTCATTGTTGATCATTGTTTCATACATAAATAGATACATAAAAAATGTCCCATCTCTAA  
TAATGTTAAGCTTGTAAGAGGCGGTACACACAATTCAATAGTTTAGAGCAAGCGAAGGTACTGGTTCGAGT  
CTGACTGCCTCTAATAAATAAAAAATAATCTTTAGGTGCTTGGTCTAAGAAAAAGAATCAAATCTACAAGTC  
AGTGGCCGTGTTGCAGGCCTAATTGAAAAAATAAAAAATGTCCTCTCTCTAACAGGTTAAGATTCTAGATGA  
GGCGGTACACAATTCAACATTCATAAAGCAACAAAGTTACCTAAGACTAAATGCAGTTATTGTCATATGTTCC  
TGGAAGATGATTCAACTTTTTCTGCTCAAAGCTTGTTCAACAGAAATTTTGACGGGATGTAGGGTATGGCTTTAG  
CTGTGCAGCATTTGGGGAAATTGGCTGTGTTGTGCAGCCAAATCTTGTAAGCTCTGCACTTTAGATGTGTGTT  
TGTGCGCTCACACTGCATACTTGAGAAATATGCCTTATTTTCTGTATTTCTTTTAGGGGAAGGAATTGATGTTT  
CTTTATTTTACCTAGTTTCTTATTCTGGTTAGGGAAACAGCAATAGCTGGGAATGCCACCTGTTTGGAGGTTG  
ATAGTCCAAAGGCTGATTATGCATACAATGAAAAGAGTGGAGAATTATGTAAGAGAACATGTTTCGATAGATG  
AAAAAACGGAAAGTAAGAACAATT

>TCONS\_00004855

GAACTGAAACAAGCTTTATATAGAAAAAATCAGGAGAATAGTTTAGAGCTCCCTCCGGAAGCATCTAGAGA  
ATCCTCAAGGCTCGACGTTAATGGCGAGGGTTCCAAGCAAGCACTCTCGCGATCAATTTCAAGTGATGCTGTGA  
AGGATAGTGCAGGTAGGATCGAATTATAATAGAATCTGGCAGAAGCAAACACATTAATTCAAATACCTTTAT  
TATGACAATTTTATG

>TCONS\_00004866

CAGCAGCACAACAAGTAGAAGGATGGTGCTTTTGAAATCGAGTTAGGGAAATATGTTGGAAACCGACCAGTT  
CAACTTCGGAAGAGTAAGTGGCAAGACAGGATTGATTATGAAGCTTTGGAAAAACAAAAGAATGTGTCTCC  
GAAGAAACCAAAGTTACCAAAGAAGAGTGTATTGCACAAGTGAGCGTCAAATCATATGATTGTGGATCAGT  
GTAAGATATTGTTGATCTATATCTATGGCCATTTGGGAAAGGAGGAAAAAGTGGCAAAGTCATTGATAGAGA  
TGCTCCTATTCAACTTATGTAGTGCTTTATGCTTCAGTTGATGATAGTTATTTTCTCCTGCCTTTTATGGCCGTTA  
GAGCTCGGACTTCCTCGGCAATA

>TCONS\_00004929

GGTTGATTTTGATTACCTGGATGAACCATTTGGAGATGCACGCGGCCTTCTTTCAGGCTTTTGTGGAATTTAG  
CATGTGACTGCGCTTTATTTCTATCCACTGTGAGAAATGGTCGAGTTTACCTATCTCATACTTCAACCGCGTC  
TTCGATCAAATTATAAAGACCAAGTTCTTCTTTAAGACAACCGAGTCAGTTGCACGACAACATGTTTATAAAT  
CTATTGGAAAGAAATGGG

>TCONS\_00004945

GTTTTAGAGCGCACAAGATGCACCTGTAAAAAGTGTATATGGTTTCTCTTAATGTGATAGCAGATTAAAGGAT  
GTATTTAGTACAGACCTGCACTAGAAAAAATAACACGAGAGCATTGGAAGGAGCAAGAGATAAACTCATCA  
TTCCTCCGCGAAGTTCATTAGGCACGTACATGGTTCTCAATCTGGCAAATGAAGGCAAAAC

>TCONS\_00005033

TGAAGGATTAGTCTTTGTGCTCATCATCGGATTCAGAATCTGATCGGACATCATCAGTTATGTGGCCTTTTGT  
ATGAGATCGTTAACCATCCGTAATATGAGTCTCATCAAAGATGTGAAGAACAAGCAAGCACACCAGCAG  
TGAATTGAACAAAAAGTAAAGTATGGTTCCTTCAGTCCGGTGCTTCTCTGTGTCCACTATGAAAAGAATTCG  
TAGCTGCAG

>TCONS\_00005091

TTCGAGGGTTTATTTTATTAGTTTTAATAATAGGAATTTTGTTTAATTTAATATAATAAACAAAGTCTATTTTGT  
ACTCTATCTGTGTATCCTTTTTTATTCCTAAAAAATAGCAGATGAAATAGAAGGCTTAGAAGGGAGATAATGA  
AATTATGTGATTGGGTCTTCCAAAAGCAAAGGAATGATCCGTTTTTTAGTTAACTGATCTGATGGGTCCAACA  
AACATAAATTATAACAAATATCTAAATTCTAAATAAAAAAATCAAAAATAATAGACTAAGATTCTAAATAT  
AAATAAAGGATAATAAATAAACGGGATCTTCTTTTATTCGAAACGTCTCGTGATCTTCAACCAATTATGCGCT  
TCAATATAATTACCGGGAGTAAGCGCTATAGCCTGTTTCCAATACTCAGCGGCTTGATCGAACCAAGCCTCTG  
CAATTTCAGAATCTCCCTGTTGAATGGCCTGTTCTCCCCGGCCGGAATAGATCACGGCCATATTATTAAGC  
TTGTGGTAAG

>TCONS\_00005249

GATGCTGTATGCACTGGGTGGCCCTCTATAGTGGCATGTTATTTGCCAAATCGACATCAGGACTGCTTGACAT  
TGTTTGTCAACATTTGTGCACTGCTTTTGAATGATGAATTCTGCTCTGTCCTTGGCAATTACTAGTAACACCAA  
GGAGAAAATATAAACAGAATTGATCGTTGGTGGTGTGGCCTAGCGGTCAATGAAGTGGATGAAAATCATAG  
AAGATAAGATTCAAATTCTAGTACTTCGATAGAAAGCCG

>TCONS\_00005326

AGATTGGTTCTCTTTCTCGAAGCACCCTCGTTTTCCAACAATTAAAGCGTCCAACTGATCCTAGATTCCACC  
TTAGTGAACCAGAGGCCAACAGGCTTGAGCAATCTGAGGATGATATCACTAGCTACCTTGCCTTAGCTTTAC  
TGAGAGAGACATAGAAGCAGAGGCTTGCATAGTTTCAAGCATATGGCGTTGATGTTGAGTAATTGCTGCACT  
ATTACACACCTTCTTTGTGTTTAAAATTCAATTGGATAGATGCTTCCTTGATTTTCTCCTTTCGGGTACCCAATA  
TTTGCTAAAAATCTAAGAGGATTCTCCTGATCCAATCAAAATCATGCAAGCTAGTTGGGGCTATGAGAGATG  
CTGGTCTCATTTTCCCATGCCATCTTTCTCTTTTCTTTCTATTCTCTTTCTCTTTCTTTCTTTCTTTCTTTGAAGCATCGTCC  
ATCTTCTTTGATAGGCTATCACAACTCTAATCAGCTCAACATTCTGAGATTCTGTTCTTCTGAACTACCAT  
TGTTGCTTGATCCATCTCTAGAGCTTTATTCTCATACTCCAAATGTAGTCCCCTCTCTGTTGTGATGGTATTCTC  
AACAAACGCCTGCGAACCAGAACCGCATGATGGCTCTAGTTGTTCAAATACCATAGAACAGCCAATTTCACT  
TGTCATGCAATTATCATTTTGCGGAAGTGGATGGAGTTTGAGACTTTGTGTACCCCGTTGCTTCCTTCTCCATCT  
CCTAACTTTATTCTCATATTCCAGGCGAATTCCCCAACATGCTTCCGCTTCTGAGGATACCTCAAATAGGCAAT  
AATCATTTAGGTTCTTCTCTTTATTGTGAGAAGTGCGCCACAATGCTTTAAATGGTATGTAGTACCACAAG  
ACAGAAGGAAAGTTAAGGCAACGTTGGTGGATGTGAAACATCAAGGAATGTTT

>TCONS\_00005328

GCTTACGAGTTTGTGATGCTTTTGGGTAAACAAGAAATATTGCTTCCTCTTAAATTCAACTCTTCCAGAGAGT  
GCAAAGATCCAAAATCCTCAGGAAGTCCACCCAATATGTTGCAATTACCAAGATGAAGTTTTATAATTTTTTA  
GATCATGCCCTGATAATTTTCCAGCCTCCGCAAATGCATCCCTCCATCTTTGAACCTTCTCCATATCATCTTTGT  
ATTTTCTCATGTTGGGAAAATGACTCGGCAAATGGTGGACTTTGATGGCGTACATCAGATGGACTCACATC  
ATAAAAGATTGGAATCACAGTCTGCTCCAATTCATTTTGACACTTTATGATGTGGGCAAGCTCCTCTAAGCAC  
CATCTTGAGGATGCATAGCTTTTGA AAAATATCACGACCGCAAATCTGGAGTCTTCTATGGCTTTCAAAGTT  
CATCAGAAATTGGTTTTCTTGTTCAGACGCTCGTCATCTTTTACCATAGTTAATAGGAGGTAAAACTGA  
AAGCAAG

>TCONS\_00005329

ATTCTGCAATGTCCAAGAGACGGATGGACCTCTTCCAAATTCATACACCCACACAACTTAGTGTCTCCAAGT  
TTGGCATATCACCAA AATTAGGGCTTTTTGTAACTGAGGCTCTTGGTTAGATCCAAATGCTTCAACTTGTTT  
AATCTTTATAATTTTTAGATCATGCCCTGATAATTTTCCAGCCTCCGCAAATGCATCCCTCCATCTTTGAACCT  
TCTCCATATCATCTTTGTATTTTCTCATGTTGGGAAAATGACTCGGCAAATGGTGGACTTTGATGGCGTACA  
TCAGATGGACTCACATCATAAAAGATTGGAATCACAGTCTGCTCCAATTCATTTTGACACTTTATGATGTGGG  
CAAGCTCCTCTAAGCACCATCTTGAGGATGCATAGCTTTTGA AAAATATCACGACCGCAAATCTGGAGTCTTC  
TATGGCTTTCAAAGTTTCATCAGAAATTGGTTTTCTTGTTCAGACGCTCGTCATCTTTTACCATAGTTAAT  
AGGAGGTAAAACTGAAAGCAAG

>TCONS\_00005363

ATCCGTTTCTCTTTTCGAAAATATCATTCTTTTCACTGTTAGAATTCGTGGGATTGCTGAATTAGTCTGAAGCT  
TTGATTCTCCTGATATTGAGCGAATTCCTACGACCCACTAAGGGTTTGTGGCTAAAGATCAATTTTTTTCATGG  
ATCCCAAATATACAGGAGAAACCTTTAAGCATCTGGAGAAAGAAAGTGAAGTACTCTTGAATACCCATAAAT  
CAATGTCAGATGAATTGCACAACTTCAGGTTGTCTTCTCTTGCTCTGAACACCACCATATTCCTTTCTTGCCG  
AATGAAATACATAGTTGCTGCCAAAGTTGT

>TCONS\_00005421

CTTGTTCCGATTTTCTCAAGCAGGAAATGGCAACACTATATCTTCGTTTGCAATTACACCCAACTAAATTGGGT  
GGTGGAGAGCGAAAAGGAGCTAATTTAAAATGAACCCATTTTGGGTATGTAGCAGGCCAAGGGATTGGAGA  
AATCCTGAGCGAGCTGGAAATGAAGTTAGGAGGGAATTGAGCAGTGTTGTTATAGAGTAGTACAGGAGCCA

ATCTCATGGCTTTAACTTTGATGGAACTATCTGAAAAGGATTTTTCTGGTTCAAGAATGGAAGTGGTTTTGCA  
GTCCCG

>TCONS\_00005459

TCCAGGCTGAGGGTCCTGACCAAGGCGTTGACTTCCTGAACTACTTGTGCCAAAGTAGGGAGCACACGAGC  
CGAGAGTCTCGTTGCTGAGAAATTACTTAGCCATGCTAAGGTATGATACATGAGCGCTGAGAACCATGAAGC  
GAGTGGCACCTCGTGGATTGGGCCTATTCGATTAGGTTGGGATCGAACCCGTGCCGATCACACGGTGACTG

>TCONS\_00005545

GTTCTCTCTAAACAATGTTTAATATGGCTTTCACTTTCAACGATATGTTTGTAATAGAATCTGGTGTATAGTA  
TATATGGAAGAGTAGCTTAAACGACTCCCTTTTCAAGGTTTGCCTTTGAAACACAAAAAGGAACCTCTG  
AGCCCTTTCCCAACCTGATCTTCTCGTCAATGTATGTGATCTCTAATTTAACTTCACTCTCGCCACCATACTGG  
AAATCTAGTGCCCCTACCTTGAGTTCAGGCGGCTCGAAAACAACCTGTATCCATTTTTATCTAGGACGTTCA  
ATTTTCTCCGAATATTAGAGGGCATTTCACAGGTTTATCCACACAGAAACGTTGCAATTCTTGAGCCACTTC  
GGCTACCTTTTGTGCTCATCCCTTGTGAGGAAACCCCTCGATCTGTTTGATAACCT

>TCONS\_00005653

ACAAAAGGCCAAGACCAACACATTTTAAAGCAGGAGCATCATATTTTCAAGTTCATATAACATTCAATAGAGGC  
TTCCTAGATCTTGTTTAGCTTTTCTGCTACAACAACAGGATTTGCTTTAGCAATAGCATCCCGACCAGCATTCT  
TATAATCAAATGGGCAGTCATGCTTGTCTGAATAACGATGAGCTGCACAGAAAAGATTTCCACACTTGCAATT  
GAACCCTGTAAAGCCACACGCTTGCGGCAAGTAGTGACCTAGTTGGGCCCCACTTTTGGCTTCACCTCTGAA  
CTCTGACCTGAGGATAAATCTGAAGATGCTTCTGTAGAGATAACCTTTAATTCTGCTGATCCTGGTTGCACATT  
GATCGCACCAGTGACAATAGGCTCTTTGTCATTACTGCTTGAGTTTCCATTTACAATGTTTTCGATTGATGTAG  
CTGCGAATTTAGCCTGTTTCTGCTTCAAGTACCATGTCCTTGTGACACTTGGAGCACATATTCATGGTGGCTGCA  
CTACCAAAGAACCCACAGTTGTTGATGCAAAGGATGGGGCCTTCTGGAGCTTGGCAGCCTGTCTCTTTGGAGG  
ATTCCATTTTCTGCAGTTAACCTGCCACTTAATCGAAGCGATAAATCGAGAAGTCGAGAGGTGAAGAAAAGA  
GGTAGAAATTGAGAAAGATTAGAGAGAGAGACCTAAAAAAGAGAGAAGAAAGAGAAAGAGGAGGATTGA  
ATTGTAAAACTGCGGAAAATGATTTTTCTGCCCTTTTATTTAATTGTAATTTTCA

>TCONS\_00005654

ACAAAAGGCCAAGACCAACACATTTTAAAGCAGGAGCATCATATTTTCAAGTTCATATAACATTCAATAGAGGC  
TTCCTAGATCTTGTTTAGCTTTTCTGCTACAACAACAGGATTTGCTTTAGCAATAGCATCCCGACCAGCATTCT  
TATAATCAAATGGGCAGTCATGCTTGTCTGAATAACGATGAGCTGCACAGAAAAGATTTCCACACTTGCAATT  
GAACCCTGTAAAGCCACACGCTTGCGGCAAGTAGTGACCTAGTTGGGCCCCACTTTTGGCTTCACCTCTGAA  
CTCTGACCTGAGGATAAATCTGAAGATGCTTCTGTAGAGATAACCTTTAATTCTGCTGATCCTGGTTGCACATT  
GATCGCACCAGTGACAATAGGCTCTTTGTCATTACTGCTTGAGTTTCCATTTACAATGTTTTCGATTGATGTAG  
CTGCGAATTTAGCCTGTTTCTGCTTCAAGTACCATGTCCTTGTGACACTTGGAGCACATATTCATGGTGGCTGCA  
CTACCAAAGAACCCACAGTTGTTGATGCAAAGGATGGGGCCTTCTGGAGCTTGGCAGCCTGTCTCTTTGGAGG  
ATTCCATTTTCTGCAGTTAACCTTAATCGAAGCGATAAATCGAGAAGTCGAGAGGTGAAGAAAAGAGGTAGA  
AATTGAGAAAGATTAGAGAGAGAGACCTAAAAAAGAGAGAAGAAAGAGAAAGAGGAGGATTGAATTGTA  
AAACTGCGGAAAATGATTTTTCTGCCCTTTTATTTAATTGTAATTTTCA

>TCONS\_00005783

GAACTGCTTGAGGTCTCATCTTTCCAAGATGCTTGCCATTGCTTGTCTAGAAAAGTAGTCTCTTCCACCAACTT  
TTTGATAGTTTCTATATCCTCATTCTTGCGGATTAGAAGAACACCGGCTACAGCTACAAACAATAGTGTTTTAC  
AGAAGAAGTTTCCATTTGATCGACGAGGCCTACACCAGTCAAGCTATCCACAAAGTAGGCCATAAAGAAA  
CCAACCATTGCAGCACGACCATTGAGACGTTTCAAGTTCAGGAAGATGAAACCTCTTCATCCATGCCCACCAA

GGAATAATTGAGGTGTCGAAAAGCACAGGATCTTCATTACTTGATGACTCTGGGTTATCTTCTAACCATTTCCT  
TCT

>TCONS\_00005858

ATATTATTGTCCTGAGTTGCTTGGAGGCTTTTCCTTTGGATGCTTAGAGCCATAGTGGTCCACAAGTTGATTTTG  
ATTTGCTAGCTGCGCTTTACAAACGGGGCATACGACTTTGAGACCAACAGCTCGGGCCTCAAGTTGAGACCC  
TTTTGATTTCTGATTCTTCTCCGCATTTTTTTTTCTGGGCTTCGATCTTCTGCTTCCCCCTTGTCATCTCTCTTTCTCT  
C

>TCONS\_00005946

CTCACAATCATTTGGTCAGAAACATCGGAAGGCTATTTTGACAAACTGTCCTGGCTGCATCAAGTGGCATCTC  
CATCTGTTACACTTTGAACGATTTCAAAAACAATTACTGGCCTCAGCAGAGTAGGCAGATCAAGTTATGCTCT  
AGCACGAGATGGATGGCTAAACGGATCATTTTTTTCGAAGACCCGAAACCCCCAAATCCCATCATGGCTGCAA  
CATCAGGGTCTATTTTCGGGTTTCATCCTCTGCAGCCTTCTCTTTCTTTTCTCTTTCTTTCTCTCGACGTTGTCTT  
TTCCGTTCTTCTCTTCTGCTGTTGTTTCAGCAGACGCTCATCAAAATCTTGAACAGTGAAGCTCCCCGTATCT  
TTCCGCTTCTTGAGCGATTCAAATCGTTGTTGAACCTGCTCCAGCGAGGCTCGTTCTACCCGCATAGACATACC  
CAATGCTCGCTGATGCTTCTTCCCATTGATATGGTCCAAGTAGTTTGCAGAATCCTTTACTACACATTCACAAA  
CTCGGCAAAAGTATCCAGCCTGCTGACTAAGGGGTGCAATTGGAGTAACCACTGAGTCTTTCCCAAACGAG  
ATTCAAGGTCGACTTGATAATCCCTTTGTTTCAAGGGCTTCCTCTGTACTGGAGGTCTCTTGACTTGGATTTCT  
TTCCCTCGGTCTCCTTTTCTTACGTTACGAGCAGCTGCAAATACTCTTCTTTATCGAACTTTTCCGAAAAG  
TATTATCAATTCCAACAACATTATCGCTGGATTGAGCCATTATAGGTTTAGAAATAGGGCTTTGC

>TCONS\_00006013

CTCTGAGACCATGTTGTCGTGCGAATGCGCTAGGAACATGCAGAAAGCACTTTGAAAGGTAATAGGGTTTCA  
TGGTACAAATGAAATGAGGATGACCAAGATGCAAGTCCTTAGCAGCTTCTACATTGGGAACAGCCTTGCATG  
ATGATATGATGTTGGACTTTGGTTTTCTGGAGTGGAAACTCTTTCAGTATCCGAATTAGTCTTCTTTCCC

>TCONS\_00006125

CTCTAATGCTCCTTCCATATACGACCTGTGACTTTCAATGTAAGCTCTTGTCCATTATTCCCACCAGAAAAGAA  
AAGTGCCAAGCTTGTTGGAATAATAAGTCCATCTTGACAGTCGCGAACTTTTCTGTGGCTGTCTCGGATACTC  
CTAGGAATACCTTGCCATGTCAATTTACGCCCAAAACCACCAACTTCTAGACTATACTTGAACATTTTGGCTT  
CAGTGTCTCGCCCATAAATCGTAGAAAAGGCCATGTAAACTGGTGTACATACCAAGTGAAAATGCCTCAAAGT  
GCAAGCAGAACTGTTTTCCATAACAGTCGAAAACCTGTGAGCATCCATATTGC

>TCONS\_00006147

TCTGCAGCTACGAAATTCTTTTCATAGTGGACACAGAGAAGCACCGGACTGAAGGAACCATACTTTACTTTTT  
GTTCAATTCAGTCTGGTGTGCTTGTCTTCTTACATCTTTTGGATGAGACTCATATTACGGATGGTTAACG  
ATCTCATAACAAAAGGCCACATAACTGATGATGTCCGATCAGATTCTGAATCCGATGATGAGCACAAAGACT  
AATCCTTCA

>TCONS\_00006175

CTTTGTCAGTTCCAATAATGCCAATCTCAATGTTTTTGCCAGAGATCTGTCCCTCGAATCCCTCCTTTAGAGTC  
AGTATAGCAGTGTGTACAGCATCATCGAGCTCTATATCCTCCGTCTACCTGATATAGTTGGGGACCCTTGTCA  
CAAATCTCGCAACCAAGAGTGAAACACCAAATGGCCTTACACCACCTGATTAGGTGAATTCCTGCATGACAG  
CAGCAGTTTCCCTCACCAGCTGTGTGACAGGGATTGGTTCTTTATAGAGTCGGTGATATTGCTCAGCCTGCTTT  
CTACTTTTCCGAACCAAAACTCGAGAATCAGGGGCCATCCCACTGTAGACAACTCCAATATTAGGCGTCAAA  
ACCTGTATTTTCTGCACAGATGCTTCATCAACTAAGATGGATGGAACTTCTTCTCCGTAGCAATTCCAACAC  
CATTAGCAGCT

>TCONS\_00006230

CAGGCACACTAGTCTGATAACGACTCGGATAATCAAAAAGTTTAACTGCAGCTAGCAAAAATATGCTTAGTA  
AGACTTTCCACAATGTATCAAGCTCCCAGCACCCAAGAAGAGACCAAAAATGGCTGCACTGCCCAAAGTTGT  
TTGTCCAATGTATCTGATTTTCATAAGGCCAGGCACCCTGTATCTAATAGCCTCATAAGTCCCATAAACAGCA  
CCAACAGCGCCACCAACTGCACCGCCTACAGCAACCCCAGCAGTTATTCTCGCTAGACAACTATCTTTTGCCA  
TCTCTCTCTCTCACACACACACACAGTGACTTTGGTTCTACTTCTCA

>TCONS\_00006324

AGTCTTTCCACAAAGCTTATTATCGTATATTTGAACACGCATTTGACTTGGTGAAGAACCCATAAGATGTGAA  
TGTCTCTGCCTAATCACATTCTAAACCATGATGACTACACGAGTTTTTCACGAAAACCTATTTTCACTTTTTGCAA  
AAAGTTCACAAACAAACAGAACTACGCACTGCATAAATACCAGGAAAGCAGGACAGAGACAAGGAGTTCA  
TAGCTGCTTTTCAAACAAAACCTAGGATTATTGAATATATAATTGTGTAGCTACGGTTGTGCGCCATAATTCAA  
AGAAAAAGAAGAAGACTACTGTATAACTTCCATGATCCACCAGATGCCACCAAATGTTGATTATTGACTCGA  
GCAATTTTCATGCTTTTCTTTCAATAAAACAGTCATTAGGTCTTCCGAGATGAATGGAAAAAGTCATGCACAGA  
AACAGGAAGATGC

>TCONS\_00006345

CGGCTTTCTATCGAAGTACTAGAATTTGAATCTTATCTTCTATGATTTTCATCCACTTCATTGACCGCTAGGCCA  
CACCACCAACGATCAATTCTGTTTATATTTTCTCCTTGGTGTTACTAGTAATTGCCAAGGACAGAGCAGAATTC  
ATCATTCAAAGCAGTGCACAAATGTTGACAAACAATGTCAAGCAGTCCTGATGTGCGATTGGCAAATAAC  
ATGCCACTATAGAG

>TCONS\_00006361

AAGTAAGAGGTTGTCTCAAGAGCAAAATAGGATGTAAAAATCGGTTTATATGAAATCCACCAAAACACACA  
ACACCAGAACAAGTCCTTTTGGGCCTCAAACGCATCGAAATATTTGTAGAAAACAGAGAAATCTTCTGCTGA  
GGAAAACAGCAGAGGATTGTTGCATACACAGAACAAAAATCACTGAAAATCTTGCCGACATAAAATCAAT  
CTCCCCTTCTTTACACAAATAGCCTCTTTTCTTCTCAGTTCTTCAACCCCAGAAATAAATTAAGCCAG

>TCONS\_00006451

CAGGTGGATACACCAACAATCGCTTACTGAATAACAAGTGCTCGCTCAACCAAAATCAAGACATATGGTCTG  
ATCAATATCTAGGATACAGAAAACGCATAAGCAAAAGGAACAGAAACATTTCCACCCAGGTGAACTAAAAC  
CAATAAAACAACATGCCGCCAAAGAGATTGAAAAGCTCCACAGAAACAAATCTAGATCAATCCCTGGCGTT  
GTAGATCCGTATGTCTTTTTGTTGTAGATGTTGCCCTCTTGATCTTCATATTCTTCTTCAAGATCTGGGCGCCAC  
TTATTACGCCCTTGTTTTCTTGATTCTTTCCCAAAGTTGCTTGGCTTCTTATACATTAGTGATCACCATTCTGC  
ATATTGATGATAGCTCCTTCCAGGCCATTCTGCCTTCCATCAGCACCATTAAATAGCGTCAGCTGCTGCTCCTTG  
CAGGCCATTCTGCCTTTCATCAGCATTATCATTGAAACCTTTCTTTTTATTTAGACCATGAGCAGTCATAAGTC  
CATAGAACTTGCGCATCAGCATTCTTCTTCAACCT

>TCONS\_00006563

TCTAATTAACCGTACAAGATTGTCAATGGCAAGCTTACCCCCATTAATTAACAAAGCTATAGTACGATAAAA  
ATAACAATTACAGAAAAGCAAACAAATTCTACCCATTTCTGAATTTACTTCTCAGAGGAGTTTGGTCTCTCTTC  
TTGCCAAAGCCAACAACAGCAGTAACGAAACGCCTATTATACTGCATCCTTTTGTGTGCCCCGCCACGGGGC  
TTCTTTTTCTTATCTTGCTTGGCGACTTTGGGTGTTTGGCCTCTCACCTTACCAGCACGAGCCAATGATCCGTGA  
ACCTTTCC

>TCONS\_00006572

GTGCTTACAATATTAAGAGGTTGAAAAAGTCACTAAGACATCTGCATTAAGATAAGTACTTCTCCAATTTTT  
CAACTTCTTCTGTGCTTCCAATAAACAATGGAACCTTTGATGTATCTCAACTGGTTGAATATCAAGAATTCTT

TGTTGGCCATCTGATCCTTTGCCACCAGCTTGTCTACAATAAAGCTCATGGGTGCGCACTCATACAAAAGTC  
TCAACTTCCC GTTCTTGCTCTTCTTGCTCTCGCGGGTAACCATATATACCACCATATAAAAGTGTCTATGAAAA  
TCACCAACTAACTGCCAATGTACCTAGCCGAGTAAGGCTTACAATTAGGACCGGGTTCCTTCAAGTGATCG  
ATGTAATTCCTTAACCTGTCATCCCATAGCTGATAGTTTCCTTCGTTGAACGCATAGATCTTCCGGTCTTTGGT  
ATTTGAATGTTTTCTTGAGTCAGAATAAATTCTCCGAACATTGGATCCAATGTGAAAGAAAAGACTCCTTTTC  
CCAACGTGAGCACGAAAATCACAGAGCTCGAGTACATGCAGTAGCCTGCTGCTAAAAGGTTGTTCCCTGGTT  
GGCACACATTCACTATGCACCT

>TCONS\_00006692

GGTTTCTGGAGATTGCTTTACTGATTCATTCTCCTGCTGAGTGGCTTGAGCCCTAGATAAAGTCTTCAGCTGGC  
AGTTTTCCATGTTTGAGAGCAGCTGCATTACAGTTTTTCAGCTGAGGAACACTTTGTAACCCGTTTTCCATATGA  
GCATCCAATGCTGAAATCACCTGAGGCAACTGCTCCAATACCAGCTCTGTATTCTTGATTGTAGGTGTCTTAG  
CAAAAAGAGTCTTTGGTAGCTTCATCAGTTCGGCCTGAGATGGGGAGGACTGAAGCATGAGATGGAGGAGAT  
TGGAAGTGGACTGTATAGACTGAGTGATTTGATCAGCTACCATCGTTTTCGCTGACCCATCTCTGCTGCTGCT

>TCONS\_00006967

GCATCAAAGTACTAATAACTCTTGATATACAATATCACAACTTTAAATCACATTA AAAAATTCAAACATACA  
ACCAATGTAATGAATACAAACACTAATAAATGAAACAGCCTGTCCAGAATTCTGTACTGAAGCACGCAAGA  
TTCACGAAA ACTTAACCCAAAAA AAAAAAATTACA ACTTTAAAAGTAACACATCTTGATTCATAGGAACCA  
GCAACATTAGCAGAAATGGAAGTTCACATCTTTACCATGTGGGGAAAGGTGATCAGTCGTTCTTGTAAGG  
ACCCAAATAGCATAGATAATACCAGGCAGCCATCCAAAGAGAGTCAGCAAACAACAGATCCAGAATTCACA  
CTTGACGCCAAATTTGAGAAAGACACCAAGGGGAGGCAAGATGATAGCCAAAAGAATGTCTATGCAAGTCA  
TCGCACCCATATTTTTTATTATTCAATAGAAATTACACAGGAAAAGAAGAAAGGACAAGGGGCATATACTGG  
GGAAAGAGGATTGAAATGGGGAAGTGGCTGCT

>TCONS\_00006983

GATAGGCTTTTCTCTCTCACGCATACAATCTCAGATCTGTGTATGTACAGTAAAAAGATAGACGTATATTTGA  
TGTTCAGTTTGCAATTTATCGCGGCGGTCTCTCATTCGCTTGGTGCAGGTGCGGACCTGCCTCGCCGGCGACAAT  
GACGTCTGCTGACGGTGACGGTGGCGTATCGATAGATATACATGTTGTTTATGACGAAGTTTTGGTCCCGCCTT  
GCATCAACTGAATCGGAGACTGCGGTGAATTTAATTTGTTTCAAGTAAATCAGCTTTGTTATGGATCCATCTA  
ATATCTACCGCTTGTTTCCTGTGAGCGTATAACTCCAATGATAGATCTAAGAGGATTTTGCGAATTCGATGCC  
ATTAGTTAAATGAAGATGTTTGATTTTATTGAGTACAGTTAATGTTATGATTTAGGTAATCTGTAATTAAGAAA  
CGTGATAGATTGTATTGGAAGCTTTTCTGCATTAATTCCCTTTTCAGATAGTTTAGGAGGATGAAGTAACTAA

>TCONS\_00006990

AGATACGAAAGTAATTTTAGTGGCCCATATGATGCAACAAAATAACATGCTCTGATTTTAAAGATCCAGAAT  
AAATTGTTGCATTAGATTGATCCCTTTTCCGCTGGAAA ACTAAGACCAAATCTCTCCATCCATACATACGTT  
AACATAGACATACTGCAAAAAATTAGAAGAGCTGGAATGCATTTAGCGGCCTCGACCACGTCCACGACCAC  
GTCCGCGCCCGCGACCACGTCCCAAAGGCTTTCCAGCTGTTGGCTTCTTCGGCTTCACCCTAGGTGTTTCTTCC  
ACCAGTAAAGTCTCAAGATTTAAGCTGTCAGGGAGAATGTAATAACGGATGTTGTTACCCCTCACACTCAGG  
TGATCCAACGTCACCTGGATTCTTTCCCTTTAGTGTAAGTTTGACAGCCTTCAGGTGTGTGTTTCATGCTAACATC  
CACACCTGTAATAGTTCCATGAACAACAGTGCCGTTTTTGAGCTCAATTGATACAGTCTCGTTGTTCAACTTCA  
TCAAAAATCTG

>TCONS\_00007018

AGTCAA ACTATAATCAAACGAGATGCAATCCAGGCAAACAGAAATCCTCTCAAGAAAGTCAGCTTAAAAGA  
GAATAGGTT CAGGATAATCTCCCATATATCTTAGGTGGACAAA ACTAGCAAGTTGCCCAAAAACACAAATC



AACATCCTTACAAGTAATAGAAGAATAAATAAGCTCCTTCATAGAAGATAGTAGATTAATTAATGCAGCT  
CCAAACAACAGACAACCACCATCTCTGGAGCTGCCAGAGAGATAGACAGCAAGAGGAACAGGGCAGCAG  
ATTCACCCAAGAAAGCATCCTAGGCATCTAGAACCCTGCTCTACTTAGATCTCTGTCTCATCTTTCTGCGCTTC  
CTCTTCAGTCTCCTCATACGCTTCTTCTTCCACTTGCCCTCATCCTTGCTCAAATTTACCGATGGCTCACTCT  
TTATCTCTCGACTTTCGCCGCTTTCACC

>TCONS\_00007083

GCGGGTCGGATGGAGAACAAATGCAAAAACACAAATTTGTAACCTTTAAAAATTGCGCCAGCTGAGCTTGCG  
AAATCGAGGGGACGGGGCAATGAAAGTGAAAATACTGCGTATCCTTTTGATTGTTTTCTTATATACCGTGAC  
GCGTGTCCAATAATCACATGGTGGCTTGAATCTGATCTATCACACCAGTAGGTGCTTCATGTTTGTTGCCAATT  
ACTAGAATTAGCTGGGTAAATATTTAGCCAACTGCTTCAATTATGGCCTGTCAGTAATTTTTTTCA

>TCONS\_00007103

CTTATTACAAGCGTACATTACTGAGTCTGTCACACCATGCTACAGGGATCTAAGCAACCTACAAATTCCCTCC  
ACACCGAAGGTCTAATATATGATGTAAGGTAGTAATGATACAAAGATCTGTTTAGGCTATAATTCCTTCTAGA  
GGACAAGGCTGCAAATTTTTAGGACCTAAAATCTAAGATTTTACGTACAGATATCTCATGAACAATCAGAGT  
ATCTACCATTGACAACAACACTACAGTCACTAAAGAAAAGAAACAAGAGCAAAAGGTCAGAGAGAGAACG  
AGAGAGCCTATTAAGTGGATGGCATAGAATTGCTCCATGTCGATACTCAAGGGTAGGCCTCATCAGCCTCGTT  
TCCGTTTTTCAGTTACTTCTGCCTCCACCTTCTTGCTTATGTCGCTGTTTCATCAAAGCATCTCCATCTCCAGTGCT  
CTTTGTTGCTGCACCATTTTCATCTCTCTGTTCTTGTTCCGGTTGATGCTTCTTTTCTCAGCAGCGCTACGATCC  
TCTTTCTTTGTTTCAGTAGGTTTCTGTTCCACACTTTCTTGAACCTTGACATCCTTCCCTTCCTCATCCTTAGTAG  
CTTCAGGAACATCAGCTTCTTCTCGAGAGGGGCCTCTTTCAC

>TCONS\_00007147

CTTGCTTAGATCTCTCAATGTTCCCTTGTTTGCCCACTTTAGTCCACATGCATTGCAGAGTGTCTTGGTCCATC  
TGGCCACGACGCATTGCTGGCGTACAATTTTCACTCACACCACAATGGTGACACTTTACAGGAACAGTTTCA  
GAATGCTGAGTGCCATCTCCTGCAAGGCTACTCTTGGCTGAGTCGCAGCTAGAAGATCCAGAAGTTGCTTTCA  
AAGATGCAAATTGACCATTCTTCCGATGCATCCTTTGAGCAACCTCCTTCCTGACACTATATCTAATTTCTTG  
CCAAAACATCTCTCCTTTTCGCTTCTCTCGGAATCTAACCAAGGAGGCAAATCTTCTTGAAAGATTAACATGTT  
GTCGAAAGGAAGTTCAATAGTGGGCACAGCAGTAGGAATGTCACATTCCCCCAATAGCAAGAGCACTGCTTG  
CACCTTCTCCTGAGTGACAGCAGGAAAAAATACTTACCTTCAAAGCAAGAGTAAGCTCACTACTTCT  
AGAACTTCCACAACCTCCACCACCTCC

>TCONS\_00007148

CTTGCTTAGATCTCTCAATGTTCCCTTGTTTGCCCACTTTAGTCCACATGCATTGCAGAGTGTCTTGGTCCATC  
TGGCCACGACGCATTGCTGGCGTACAATTTTCACTCACACCACAATGGTGACACTTTACAGGAACAGTTTCA  
GAATGCTGAGTGCCATCTCCTGCAAGGCTACTCTTGGCTGAGTCGCAGCTAGAAGATCCAGAAGTTGCTTTCA  
AAGATGCAAATTGACCATTCTTCCGATGCATCCTTTGAGCAACCTCCTTCCTGACACTATATCTAATTTCTTG  
CCAAAACATCTCTCCTTTTCGCTTCTCTCGGAATCTAACCAAGGAGGCAAATCTTCTTGAAAGATTAACCTGCA  
TGTGTCGAAAGGAAGTTCAATAGTGGGCACAGCAGTAGGAATGTCACATTCCCCCAATAGCAAGAGCACTG  
CTTGACCTTCTCCTGAGTGACAGCAGGAAAAAATACTTACCTTCAAAGCAAGAGTAAGCTCACTAC  
TTCTAGAACTTCCACAACCTCCACCACCTCC

>TCONS\_00007220

GGATAACCAACGACACAGCTTATTGTCACCTTACATCTTAATTGAAAATTTGTATAGAAATTAGCAAGATCTG  
CGCGAGACAACCATAATTAAAGCAGCCAAATACGGGTCCAAAGAATCCAAGTACTCATCACAGGCAGCATG  
TGATAAGAATGTGAATTCAGTTAGCAGTGTGCTGACTTGGCTGTCCGGGATCGATTAGACTTATCTCCATATC

ATGAGTTGCCGACCAACCAGGTTTCATATGTTTCAAGAAATCCAATCTTAGCCTTATTTGGGAGATCATGTGGG  
TGAACAAATGGAACCTCCCGCTGGCCATCCAATCTCCATCCTAATGTTTGTACAGGGGCTATCAAGTGACTGGA  
TGTGACTTTTACAGTCCTTTAAGGTGCAGAACCTCAGCTTGATGCCCTTTTTATCAGCTATATCTTGAACCTCTCT  
CTTTGAGAACTCTTTGTGCCTCCAATCTCAACCTCTTTGAAGGTGGTAGAGGTTTAGATCTTGAGTTGCTCTTTT  
TCCTCCTCATCATGGGCTTCATAGATCCTGTATCAGCATTTCATCGATCCAAGGACCATCTTGGGCTGTAGGA  
AAGTTGAATGTTGGGAAATTGCTCCTGTTAAGCAACTGATCAGTTGATCTCTGCATAAAATCGTCAACTGGTA  
CAGGAAGCTGGAATTGAGCTTCAACCCCATGACCAGCAGCCCGCATCTCTGAACAATTGAGGTTGGTCATGG  
ACTTGGGCATAAGTTTAAAAGCAAGAGAACATCGTCCATATATGCTCCCCTGTTGATTACCAGTATCTGTACG  
ATGAAGTGCAGGGCTGATATAGCCCGCAGTTGCCTGATATAGAGCAAGGCCAGGATAAACTATTGCCTCTTG  
GGGACCAAGATCACCATCCACAAGAACCAGTGACCATGAAAATCTCTCACATGTAGACCAGGCTTATCTGA  
CTTAACAATCGTAACAAGGCTTCTGTCAACCTGATGTTTCATGATCTGAGAACATCACTAACTGACCATCCTCT  
TGGGTTGCCAGGCTATGGTGTCTGTGCACCCTGAAAAGATGGTCTGGCATGACAACAGACGGATAACACAGAG  
GATGATATTTCTCGGTTTCTGAGGGGAACACTATCAAGTATTTTCAGTGAATGGAGAGCTGCGCAGATTTAAAT  
AGAAGCTGATGGCATCCAATATATCTCTTGCTGCTCTTCCAAGCAGAGAGAATACATCCAATAAACCAGCAG  
GAGGAAATTCAATATCACTGCTGGGTTCTGTAGGAGTGAGCCCTGGCCTGAAATCATAAGTTTCTTGCCATTG  
TTGAGGATCTGCATGGTAGCCAGAAGTCTTACACCATTCTCGAGAGTCATCAGAATGAATAACATCAGCGGC  
AGGATAAGAGGGTTTGTGTTGGAAGTAAAGTCGGGCAGACTCTAGACTAGACCTCAAAAGAGCTCCATCACT  
TGTGGATAGCTGGATAAATAGCGGCTGAATATTGAGCCAATGACTGTGACAAAGTTGAGACTGATAATTTATA  
CGAATCAGAAGGAAGACCTTCCAATGGTATCAAATCAATGAGCTTCACACGACCCAGAGTTGGCAGGCCATT  
GCCTGCCATGGAACCCTCTAGAGACACTGATTTAGTGATGTTTGTTCAAATTGAGACCACACCCACTGAGTAG  
CAAACAGAAGACACAGTCAATTCAGAAAATAAAATATATATAAACAACAAGCAAACCTCTCAC

>TCONS\_00007221

CGACACAGCTTATTGTCACTTCACATCTTAATTGAAAATTTGTATAGAAATTAGCAAGATCTGCGCGAGACAA  
CCATAATTAAAGCAGCCAAATACGGGTCCAAAGAATCCAAGTACTCATCACAGGCAGCATGTGATAAGAAT  
GTGAATTCAGTTAGCAGTGTGCTGACTTGGCTGTCCGGGATCGATTAGACTTATCTCCATATCATGAGTTGCCG  
ACCAACCAGGTTTCATATGTTTCAAGAAATCCAATCTTAGCCTTATTTGGGAGATCATGTGGGTGAACAAATGG  
AACTCCCGCTGGCCATCCAATCTCCATCCTAATGTTTGTACAGGGGCTATCAAGTGACTGGATGTGACTTTCA  
CAGTCCTTTAAGGTGCAGAACCTCAGCTTGATGCCCTTTTTATCAGCTATATCTTGAACCTCTCTTTTGAGAAC  
TCTTTGTGCCTCCAATCTCAACCTCTTTGAAGGTGGTAGAGGTTTAGATCTTGAGTTGCTCTTTTTCTCCTCAT  
CATGGGCTTCATAGATCCATCTTGGGCTGTAGGAAAGTTGAATGTTGGGAAATTGCTCCTGTTAAGCAACTGA  
TCAGTTGATCTCTGCATAAAATCGTCAACTGGTACAGGAAGCTGGAATTGAGCTTCAACCCCATGACCAGCA  
GCCCCGCATCTCTGAACAATTGAGGTTGGTCATGGACTTGGGCATAAGTTTAAAAGCAAGAGAACATCGTCCA  
TATATGCTCCCCTGTTGATTACCAGTATCTGTACGATGAAGTGCAGGGCTGATATAGCCCGCAGTTGCCTGAT  
ATAGAGCAAGGCCAGGATAAACTATTGCCTCTTGGGGACCAAGATCACCATCCACAAGAACCAGTGACCA  
TGAAAATCTCTCACATGTAGACCAGGCTTATCTGACTTAACAATCGTAACAAGGCTTCTGTCAACCTGATGTT  
CATGATCTGAGAACATCACTAACTGACCATCCTCTTGGGTTGCCAGGCTATGGTGTCTGTGCACCCTGAAAAGA  
TGGTCTGGCATGACAACAGACGGATAACACAGAGGATGATATTTCTCGGTTTCTGAGGGGAACACTATCAAG  
TATTTTCAGTGAATGGAGAGCTGCGCAGATTTAAATAGAAGCTGATGGCATCCAATATATCTCTTGCTGCTCTT  
CCAAGCAGAGAGAATACATCCAATAAACCAGCAGGAGGAAATTCAATATCACTGCTGGGTTCTGTAGGAGT  
GAGCCCTGGCCTGAAATCATAAGTTTCTTGCCATTGTTGAGGATCTGCATGGTAGCCAGAAGTCTTACACCAT  
TCTCGAGAGTCATCAGAATGAATAACATCAGCGGCAGGATAAGAGGGTTTGTGTTGGAAGTAAAGTCGGGC  
AGACTCTAGACTAGACCTCAAAAGAGCTCCATCACTTGTGGATAGCTGGATAAATAGCGGCTGAATATTGAGC

CAATGACTGTGACAAAGTTGAGACTGATAATTTATACGAATCAGAAGGAAGACCTTCCAATGGTATCAAATC  
AATGAGCTTCACACGACCCAGAGTTGGCAGGCCATTGCCTGCCATGGAACCCCTCTAGAGACACTGATTTAGT  
GATGTTTGTTCAAATTGAGACCACACCCACTGAGTAGCAAACAGAAGACACAGTCAATTCAGAAAAATAAAA  
TATATATAAACAACAAGCAAACCTCTCAC

>TCONS\_00007319

AGCTGAACCCAGAGCAAAATCCGAAGATCATTGGATGCCAACGTTGAATAGACACCGTACGAAGATCCCGG  
TATTTCAACAAAAAGTTCCAAAGCGCCTGCCGCTGATGATGAACCAGCCATCACCAGGTCTGCCGAGTGATA  
GCATAATAAACCCACCTAAGTGGAGGAACTTCCTCTTCTCTTCCCATGTACTTGGGCAATTGCATTTCCCAG  
CTATCACAACGAATAAATAACTTATCCTGCATGCATCTAACAACAAAAAGAAACAAAAGAAAATACTAAGT  
CTAGCATAGTTGCAAAGCTTTAAACAACCTTCATGTAGGTGGTGTGTCC

>TCONS\_00007532

AGGCTTTCAAAGCATCCTGGAAACTCTAATTGTCCAGAAATTTGTCAACTCTATTGTGCCAGCTGAGTGTGCG  
AAGAGCATGCTACTGTCCCTCGAGGGTACCAAGTGCCTCCTTTAAAGCTTCTGAGCTTCTTCCCTTCTCCGCT  
TGATATCCTCTATTGCTTGTTTACGTCGTTGTATTTGAAGTTCTAGAATATGGATAAGTGTAGCTCGA

>TCONS\_00007533

GAGGACGCAAAGAATTGAGTAGGTGGTGCAGGTTCTTGAATATAAGAGATATCTCTTCCACTCTCCGGGCAT  
ATTGTGAAGGGCGCTCCACAAGAACATCAGCAAGCTCCAATATATGTAGCTGCAATTCTCTGTAAAGTGTCT  
TAATTCCTTTCTTGAAATCAACAGTAGGCCCTTTTGGGTATAATTGACGAACACCCTGATCTTCCAAACTTGGA  
GTACATCATCAGTAGTGTAGTTGCTACCAAAGAGGAGATAGGTGCCGTCAATGGGAGGGGGAGGTTTCAGGA  
GCAGAGTTGGGGTCTTGAAGATAGTCCTTATACAGCCTGTAATACGGCGGCGGCGGTGGGTATGTCGCTGTGC  
ACATATCTGATCTGACTTTCACTTAACCAACGTTTCTTTTCAACCAAAAATGGAGATTTATCTCGGCGTTGAGT  
CGACACTTGGACAGAGAAATATCGGACCTCTGC

>TCONS\_00007534

GCAACTCTCTGTCCAACCTCTGTCCTGACTCCAACAGTAGGCCCTTTTGGGTATAATTGACGAACACCCTGATCT  
TCCAAACTTGGGAGTACATCATCAGTAGTGTAGTTGCTACCAAAGAGGAGATAGGTGCCGTCAATGGGAGGG  
GGAGGTTTCAGGAGCAGAGTTGGGGTCTTGAAGATAGTCCTTATACAGCCTGTAATACGGCGGCGGCGGTGGG  
TATGTCGCTGTGACATATCTGATCTGACTTTCACTTAACCAACGTTTCTTTTCAACCAAAAATGGAGATTTAT  
CTCGGCGTTGAGTCGACACTTGGACAGAGAAATATCGGACCTCTGC

>TCONS\_00007556

GTGAGTATCTCCAGAATGAGAAGTTCCAAAAAATGACAAACAATAGTAACTTATTTCTGTTGAAAATGGCA  
AAAGGAGCTAGAGGTTTTCTCCAGACATATGAAGAAAACAGCTTTAGTATCTGTGTTCTAACTTCTCCTTTTCC  
TGGTAGTACTGCACATATGAGTAGGTTCCGACGAGGGGAGCGAGAAAGAGAGTGGCGCTGATCCAATTTTCC  
GAAACTTTGTGATGGATCTTACCAGGAAGATCCTTCCATAGACCTGGCATTACTTTCTGCTGAAATGGCGATA  
AAGCATACACAACTGCCTTCAGCTTCACCGGTTGCTTCCCCATCGCGTATTTGCTCCGATCGTTCTT

>TCONS\_00007564

TACAATAGACGAGCAAAAAACATGGCAAGGCGCTGCATATCGTTTTGAGGACTCTTCTCTCTAGCAGTAGA  
CCATCAACAGTCAATTCCTCTCCAAGTGTAACATCCCTTCTCGGCCAGCGCCTTCAGTCTCGCCGTTCTCTTTC  
CACCATACTCACAAGGACTAATGGGGTACTGGGTGACCCAATCGCTGCTACCGCTTCACAGCGCGGTGCGC  
AGCTAGCCGTCTGACATCACACATCCAAATGGAGGCGCGCACTTGCTGCCAGCTGTCTCAGGGTACTTAAGA  
TGCATTATGTATTAGCTGGAAAAGCTGCTGTAACAAACATTTTGGAGGATTTTCGCTGAAATTTGCCCTGGAA  
GTGCAAAACTGTAAGCTCTAAATTCAATTTGCTTTCCTAGTTATTTTTGGGCTGATGTGGGAAATTCTAGAATT  
CTTGAAAGTCCTGAAAATGATAATTCTCTAGGAGAACTTA

>TCONS\_00007565

TACAATAGACGAGCAAAAAACATGGCAAGGCGCTGCATATCGTTTTCGAGGACTCTTCTCTCTAGCAGTAGA  
CCATCAACAGTCAATTCTCTCCAAGTGTACAATCCCTTCTCGGCCAGCGCCTTCAGTCTCGCCGTTCTCTTTC  
CACCATACTCACAAGGACTAATGGGGTACTGGGTGACACCAATCGCTGCTACCGCTTCACAGCGCGGTTCG  
AGCTAGCCGTCTGACATCACACATCCAAATGGAGGCGCGCACTTGCTGCCAGCTGTCTCAGGGTACCTTTTTTC  
TGTCGCACTTGCCCTGATCGGTAGTTTTCAATTGTACTTAAGATGCATTATGTATTAGCTGGAAAAGCTGCTGT  
AACAAACATTTTGGAGGATTTTCGCTGAAATTTGCCCTGGAAGTGCAAACTGTAAGCTCTAAATTCAATTTG  
CTTTCCTAGTTATTTTTGGGCTGATGTGGGAAATTCTAGAATTCTTGAAAGTCCTGAAAATGATAATTCTCTAG  
GAGAACTTA

>TCONS\_00007572

GCTTCCACACTTTATCAATATTAAGCATCATGTCACCACATTCATGTTCAATCCAACCTTCCAATGCATGCAA  
AATTCCAGCTATTCTCCAGGCACTCATCACTCTTCTTGGCAGCCAATTCTCACAAGAGCCTACATTTTCAAGAT  
ATTTTGGAGTAATCATAGCTGGTGTGTTGAAGTAGAAGCAATCTTTTCGAGCTTTTCTTGGTGGAAGCTGTGAA  
AAGGGAATAAATAATGTTCTTTTGGTGCTTTCATTTGTTCAATTGTTCACTTCTCTCAATCCAT

>TCONS\_00007587

ACCAAATTCAGATTTTTTGTATTATGCAGTAGTTAAAGAAAACAAATAAAGTAGAAACCACTAGGATATTA  
CCATCTATCCGTCTAACCAACTCCTTTAGCTTAAACACAAGGCGCTGGATTCTGGTTGAGCAAATGTGTAAT  
GGTCTTGCATCCCATCAAGCAATTTTGATAGACACCAATAACAGTCAGCTTCTATGTTAGATATTTTCTCAGA  
AGGCAGATCAGACATCATCCATTTGTCAATGCTCCCTTCTAAGTGTCTGACAAGAAAACAATAAGAATGG  
TGTTGCAAGATCATTTATCCCTGCACATATCCACTGGCAGGGTGCCGGATGGCCCAAATGTAGAGTATGCGC  
TCCAGGGATTTCTGAAGTTGTGCTTGTGAAAAAAGAAACATCAGGCACCGTTCTAGGGCAGTCAACAGCA  
ATCTGCCGAAGCATGTTGATCTCTTCATCTGTGCGCTCAATATCTGAAATGTCATAGTACTGAGCAACACAAT  
CAAGATAATCTAGACGCTTTCTTCTCAGAACTCCCTCCCTTCTATCTGAATTAGGGGGTGCATATCCCTGTTGT  
CAGCTCATTATTTAAATTTTATAAGAAGCAACAACTATGTCTAATAAGAAAACCCGCAATCTAGTTTGGCA  
GGTTTTGTAAACAATGTAGGAAGCAAG

>TCONS\_00007609

CTTGAAGTGAAGGAAAACATTCATTCCGCTTCCAGGGAGTCTCCAACAAGTTGGTCAGTTCTCTTTCTGCGA  
AATAAGGCCCTGACGATCGAGAAAAGTGCAATAAAAGCTACTTCCATGTGCTCAGAGCTGCTTGTCTTGATG  
GAAACCTGACCCATCTTCCGGTTATTGAGGTTTTCGCTTACTGACATGTTTGTACCTCGACTCACTCTGAAGTC  
AGTTTGCAAGTTTCCGCTCAACACTGTATCTTTGTTAAGCGAGAGAACTGTCATCGAGAGACTCAGACTTTCA  
TTTCTCACTGGGTAATCTTTTCTCTTAAAGTAGCTCCAAAGCTTCCACCATAAGCCGCTTGCCAGCACCCCC  
CATCCGACCAGCATTACAGTAACTTCAGTCTCTTTCCAATTGAAAACTATCTTCACACTTGGTACCAAGA  
AAATACTTATCCCCGAATGGTATTACAGAAATACCACATTCAGTGACATTATTTCTTAAGTTTCTTACCTTTGC  
ACTACTGTGAATAGTGCAGATCAGCTCCTTGTGTCAGATTGAATATCGAGACCTACCGCATAAGTGGGCCC  
ACCTGGATTGGTGAATGCTGCAGCAAACCTCGGATTGAATACTGAAGTCTCGTTTGTCTTGTCTATTGTCCAT  
TGACTGAGGCAATGATGTTTTTTCTTATTTCTGCACTGCTCTCCAGGTTAATGCCATCAAAGCTCACATCATGG  
TCCCATCCATTGGTATCAAGCACTGGTCGTGCAAGCCACTGTTTCGCTGGTAACGAGACACCTGTATCTGTGGA  
CAGGGCAATCTGAATCGAAGCTTGGCGGAATAGCCATATCTGGCAACAGAACCGGCTCTGGAGAGCCCTCT  
CCTGGTTATCAGACTCATCATTCGGGGCTTACTCTCACTCGAAGAACTCTCTTTTCTCTTCGCCTACGAGCTT  
CTTCTATCAGTTGTTTTTTCAAATAGAGGATTTCCCGGTAGTCTAATTCGTCAAGATAATCCTTCTTCTGGGAAC  
CACTCAACCTTTCAAACCTGAGACTTGGTCAGTATCCGAATAGGAGGTAATTGATAATATTCATCTTCATCATC  
CGAGTCTAAAAGAGGAACCTCGTCAATTTCACTCTCAGATCCACCGTGCCTTATCTGAGCACGATGCTTTAGA

AAGGACGAGAGAAGATGTGGAAGAGAAGGCAATCGTCCGACATTTGATGGTCCCACCTTTAGGCTGTCTTCA  
AAGTCCAACAGGGTATTAACATCACTTAGAACTTTGGTGCATATGCACAGCAACAATAACTGAGACTTCCAC  
GCCTGCCCATTAGGTAGAAATTTCTCTCCGGCATTATTGGTTTTGCAATTGGGATCATTCTCCACTAAAACACTAC  
AGGATTTTCAAGCTTTGTGTCAGAGACTGCCTGGTGAATATAATGTTGCACCAAATCTGTGCAGGTGGTGATG  
AAAGATTCATAGTTAACAGGATATCCATTTATCCCTTCGGGAAGATTGAAGGAAGAATGAGTCATGACAATG  
ATGGTATTAACCAAATTGCAGGACCAAAGACTTCCGTTATAAGCTTCAACAAGGGGAAATCACTGTAGCCT  
GTGTTGATCAAATCCAGGCGCTCAAAATACAGTACCATGTCAGGTTTAGATTTCCCTTAAAAATCGTTTCACAG  
AACGCAAAATCTTCTTGTTCCTGACATTACTGGGTGAGGGAGGCAGTAAACCAGGAGTGTCAATAAACG  
ATACTCTGATGCCATTTACTGTTCCCGCAATCTCTTGAATACGGTCAGTAGCGGGCTTGAACGCGTTGGTTGTT  
GCTCTTGATTGGTCAAATATGGAATTTATGGTTGAACTCTTGCCAACTCCAGTCCTACCCAGTACAAGGATCTT  
AAATGAGAAATCCAATTGCGGTTCGGCCAGCAGCTTCTTGTCTGCTGCTATTACACGTGCTCTCTCAATTTTAA  
GATTTGCCCTTTTTAAATCCGATTCTCTTGCCCGTATCAGTGATGCCAGCTGGATTCCGGTATAAGACCTTTGAT  
ACCAGCAGGTTGTCTCGGACAGGCCAAAACGTTTAAAGAAGCCGCAAGAACTTAATCTGAAGAGCTTCAATC  
TTTACCACTGGACTAGGCTTCTCATTGACACTAAAATCTGACTGAAAAGAATCCTCCACCATCCGTTGCTGTG  
AATGGAAATGATTTGTATTCTGCTGATTATCATTGGAAGATTGGGTGTATTGGCTAATGCTGGGTGATCAAAC  
TCTTGATCAGGATGTTCTCTGATAAAAAGCTATCTGATGCTAAAAGTGGTCTCGATGAGGCTACTGACTTGG  
ATATCAACTGTGATAGGACCCAGTCCTTCAAACCTCATCATGTTTTCTGGTTAACTTAATTCCAATCACCATT  
GAACAAGAGCTTCAGAATTACAAAAATGACCAAAAAATACAAAAACCCAAATTCACAGACCAAGATTCTAC  
TTTTCTGGTTTATTTACTGAGTTAAGCAAACCCCATTTGAGAAAAATCAAGATAAATCAAAACCCAGATGCTA  
AAAACCTGGCAAATGGAACGAAATCAAAAGGGTATGAAATTGAAAATGAATTGGGTATTCTTGAAAAAAGAA  
AAAGATAGAAATGGGACCCTTTATACCATACTTAGGAGGGAGTTTTAGAAATTTGTTCTTTGATCGAAATTGA  
TTTGTGGGAAGACGCGGTAGAGGGGGGTTTTGGTTTTTCAGATAAGACACAGTGACGATGTTGTATTGATTCT  
CCG

>TCONS\_00007681

CATGATCGATGGCAACAGAGATAATGAGCTCCCAATATCTTTGGAAAACCCAATTATCTTGAGCTGGCAAAT  
TTCAGCAGGTAGTTCAACAAAGTGCTCCTCTTTATCACGCAACTCTGAATAGCCTTTCTTTCTGTAGTAAGTTGT  
CCAAACAGAAGAGTTGTTTTGCTTTTATAAGTGGTTGCTCAGGGTACGAAAGACGGATACCAAAAGTATCGT  
AATAGTGTTGACATGGTTTTTTGAATCTTTATATATGCTGTATGCATTGCTTTCTTTGACAACATCAGATATGA  
AGAAAAATGTCTCCTTGATGGAACATATACCAAACCTATTGGCAACATCATGTACGCTTTTGGAACCATTTGGC  
AAGTTGCAACTGCTCATCAAATTTGGATATCTCACTATTGCCTGCATATACTTTAGTCCCCAAAAATTGGTGATG  
ACAAGCATCTTCTGACAAGCTCCCAGTCCACGGAAATTTTATTGTGTCCACATAAATTGACGGGAAGAAGTA  
GGTAAGATTTTGAAGCTGAGTCAACATAATCTTCTTTTCCAAAGATACGAATTCTGAAATGAACTCAGAGCG  
GTCAAGAATGATCTTGAGGAACATTCTCTGGAACCTCTCTGCTAGTTGTACCTCATTGTTCTCAAAATTAGTAG  
CTCCTGATGGAATAAGCTCTGTCTCCACAGATCTACCTCGAGCCAAGTTGAGATCAAGTTTCATTCTCTCAGC  
CTCTTGAGGAAGAGGTGCTTTCAGAAATAGGCCAAACCTTTTATAAACCCCTATCAATTGGACAAGGTGAAAA  
GTTGATGTAGTACGAGTTAAGGCAAACAGGACTCTCTGTCTCAGTCCATGATTCTTTAAAGGCAGCGGGAAC  
AATCATCTCATGGAGCTCTTCTCGTGCGTCTTCGCCATCTGAGCTTTCTGAGTCAGAAAAAACATGAATCAGG  
TCTTCATCTGCTTGATCCGGCAAAAGATAATCAGTGAGTGCTCCAAGTTCATGCAAGCTCTTGCAAGGCTCTTA  
AACAGGCATCTTTCTTAGCTGCTTCTATAGAAGATTGAGGAGCACTCACGATTTGATGCATTGGAGCGTTTGA  
AGGCAAAACTAATTTGCAAATAGTTCCATCTATGTCATCAAAGTAGAAGAACTGCGGCTTGGGGCAGAAAAA  
CTCGTCACGTGGAAGCTTGGAAACAATAATGGTGAAGCAACGAAATGCTTGATGCAGAACTGATGGTTGCACC  
AGTCATATCTACTTTGTATATATTTTCTTGAAAATCTATAACTGCCGTGCAAGATTTCTGGAAGAAATCTCAT

CATTCATCCGAGCTTCATTTCTTGAAAAATGCTCAATCAAATTAAGCTCCCTTTGGTTATCACTATCAACCAAA  
 AATGCATATTCAGACTTTGGCATGCGGGCAGCCCTCTAGACTGTATAAACTGGCAACAGTTTCAGGAAGA  
 TCAAATCGTATAACGAGGCAGCATGTCTGGATATCAAGTCCTTCCTCGCCAACTTTGGTGGCAACCAATAAGT  
 TGAGCTCACCAGAACGGAACCTTATTGAGAATGATATTTGTATTTTTTCGTGACATACTCTTCAATCCCGAGTGC  
 ACTCCTACAAGAAACCCGCATTTCCAAGAAGATAAACTTTTCAGATGCTGAAGCATATAAGAAAGAGATCTC  
 GCAGTCACGATCCTATTGACGAAAATTATGCACTTCATATCTGGTTGTACCCCGAAGTTGGAAAGGATTCCAA  
 TTAGACGTAAAAGCTTTTTGGAGAAAATAAGGCTCCTTCAGAACTTCCACACGTGTCAAATCAGGATTCATACC  
 ATCTTTAGCACAACCAGAAGTAAACACTGTGGCGACCTGACTCAGATATCTGTCACACAAAGAGTCATCACT  
 AGCATTAACATCAGCTTCCACCATTGTATGGCGCTCATAGTGATCCCCCTTTAAGAGGATGCAACTAGCCTGT  
 AATGCCCCAAAGACACCTAGGTTTTCCAGAGAAAAAATTAGATGTCCATGCAGTCTCTTGAGCATCTTTTTTG  
 TGTTCCTGAGAGTGCTATGATCAACTGCTTTCTTGTGAAGCACCATCACACACTGGTGTATCTCTTCAAGC  
 TTCTGAGAGTAAGCTTTAGTAAGACACGCGGTGCCAGGACCATAGTAGTATACATTCACCTTAGGTGATGCA  
 ACAAAGTGTCCAGTTTCATCCTTGTCTTCAACAGAATACACCTTAGAGCGAAGTAAGGTCTCAAGGCCTTCAA  
 CAGTAGCACCTTTTCCTGATATTGGAGATGCAGTCATGCCAAATATACGGGGCAGTTTACTACATCAGGTTT  
 GTAAAATATCTTCATAATCTCAGCATAAGGATGATCACTCTCAACTTGTGCATAGTGGCACTCATCAAAGATC  
 AGAAGAGCAATAAATTCAATCCTGATATAGCAGTGGGAAAGATTATGTAATAGTATTTGAGGGGTCATAACA  
 AGGACCTCATACTGTTCCATTTCTTTTTCCAGTCTTCGTGGCTCTTCAAATGCTTGGATTTCCCGCAGTATGTC  
 CCAACTTTGAAGTCAATAGAGTCTTCTATGACCTTGGCTTGTGTTGCACCAACGCCACAGTGGGAGCAAGAA  
 ACACGCAAATGCTCTTCTGGGGTTTCCTTATCAGCTGTCCCATCTCATAGATAAGCAAGACGGCTATATGAGT  
 TTTCCACAGCCCGTTCCAGATATACAACAACATTCTCCTCTAATGCTTTTTTACAAAGATCCATCTGATACT  
 TTCTAGCAATTTTTCTGGGGTCTTCTCTGTTTTCTGAACTGAAACAGGGGAATCTATGTCGCCACTGAGAGAC  
 AGAGCAGAAAGCTGCTCAGTGATCGGTGAAGTTGCAGCACTTGGTGGACTCTCAGTGCCGTTCTCGAAGTCG  
 CCGGCTT

>TCONS\_00007712

GTTGTTGTTGATCTGCTGATGCTGTTGCTGCTAGCGTTCTTTTGTCTCGCTGCTATGTGGCTGCATTAACACCC  
 AAACAGCGAGGATCATACTAAAGATAAAGGGCAATCTGGAGGAGATTGCAGCCATGGCGGTTTTGAGAAAC  
 TCAATGCCTGATCCTAGTGAGATATGAGCCTCATATTAATAAGCAAAAATCTCATTAGTTTAAAGTCTGAGGC  
 TGTGTGAAAGCAGAAGGCTGTGGGGAGTTTCAATTAGTGGTTTTGCCCCCTTCTGTCATTCTCTAATGCCGAT  
 GATCACTCAAATGAAAATATTTCCGATTCCAAAACCAGCCTTTTGGTGAAAACACATATAACCTCTCTATTTT  
 CCTTTCTGTCACTCCTGTTTCATTTTATGTGATGCAACGAGGCTATGAAGATTTTGTCTTCTGTGAAAGATGA  
 ATCAAGACATATTTCTATTGAGCTGGGAAAAAACTGTAAGTTGGCATGGCAGCTCAGACGGGTCTGTGAGAT  
 ATTGGAAAATGTTCCATTTCTTTGGTGCTTCTTCCGTGTCTCTTAAGGCTAACTGATGCTTGCAGCCATGGTGGT  
 TTTACCAAAGCATTTTGGTTTTTGTCTGAGGAAAGGCGAATCTGAGCCTACCCCGTTACTTTGAATTTGGTTTT  
 TGGTTTTCGCTCTTCTCCTTGGTTTTTACCCCGTTAATCTGAGCTTACCCCTAAAGCTTTTACTAATGACTCACTC  
 CTAATTCCTAAAGAAAGAAAGCGAAATATGTACAAGAGTTTTTGGTTTTTGTCTTCTCCTTGGTTTTTGCCTCA  
 TTAATCTGAGGTTACCCGAAAGCTTTTACTAATGACTCACTTCTAATTCCTAAAGAAAGAAAGAGAATATATA  
 CAAGAAATAATTTATATTTACAGCTTTTCAGGATAGTAGAAAAAGAACTGTTATGGAGATGTAACAAAAACAA  
 AGCTCAGGAGAACGAGAATGAGGCTTCAGAGAGTTTAGGATTTTCTGTTGAAAGGGTGGTTGCCTCTCTCCGT  
 ATTAGCCCATGATTTCTCCCTTACTGTAACAATCCCAACAACCCTGTAAAAATTTTCATGGAATGGCCAGTTTTT  
 GCCTTGCTATTTAAGGTATATCCATTTTTTTCAAAGTATTTAACTTGTAGCCAGTGTTGGTGAGTATGATTGACT  
 GCTTGAAAGAGGCGCTGATGATTTTT

>TCONS\_00007828

AAACAGACAGAAATCGATCTGTTTATGGCAATTCTACAGAGAATTCGAAACCATAATTTCCAACAAGATCAG  
AGTACATCGATCTCCAGTCTCGAGACAACCTCATGTGCTAGAGCACAATTTCTGACATCGAAGAGCAATTGTA  
GTCAATCAGCCAACGCATAAGTCTCAGCAACACCAAGTCTACTTCATTGTGATGCGGAGTTAACGAGCTCTTGT  
TTTAACAAATTTGGTTCTTGAAGCTTTCTTCTCCAGTTTCTCTCTCTTTTTTCTGGTCTTTTCATCCTCTTCAGCAT  
CCTCTGAACCTTGAGGTAAAAATCCTTTGATAAATCCAGAGAGTTTGTACGCTGCAAACGCAGGTATAACTA  
GATATGTGTACCAGAACTTGTCTGAGATGATAGAAGCCAACCTGCACGAAACATGTAATGTAGATTACATCAT  
GTAAATATCCACAAATACCACCAGTACTCATATCATATCCACCATCAAAGAGCTCGCCATCATCACCATAAC  
TTGGTTTTGACATTGAATCTAATTGTTTGTATGGTAAAGCATAAGCCAAAGAAGTCAACAATAATCCTATTAT  
ATGCTTCCATGTGAAACTTGAATAGAAAATTCCAGCTCTCACCAATAAATAAATTACGTTGCAGGCAAGGAT  
GATTTGAAATAGTTTCTTCATATGACGAGCGTTTTCTTCTTTTCGCTTCTTTGCTCCTTGATTCGCCATCTTTGGA  
TTCTTCTAAACGATGTCGTATTCTGATCTAGGAGCAAACCTTAAAGCCCTAATTTTGGAATTGAATTGTATGAAA  
TTGAATTAG

>TCONS\_00007833

GCATTGGCAATATGATAGTTGTAATCAATTCCTGAACAAATTTGATGGAACCTTTAGATGGTGTGGCATGATT  
TTTATATCAAAGGGCACGTGAAGCCAAGCCTCAGGCGGATAGTACAAGAAGTTTTCAGGCTTACTAGTATAG  
ATATCTGCATATTGATGAATGTGGTAAGCAAAAGCAGACTCCTGACCAGTATCAGTGAGGAATGTAGCTCCA  
AATGATTTATTGAACATTCCTTTTCATTTTGTAGCGAGTCTCTTGTCTCTCTTCATTGAGCTCCCTAAGGAGAGAC  
TTGTATGCTTCACTTGTATCTCTATTAGTTACTGTAGCATGAAGCCTACCAAGAAGTTCTTGTATTATGTGAAA  
CTTCGCCTGTTCAAATCTGTAAGTATTGTCATTCTGAATTATGATCTCATTCTTCAATTCATGGATGATGGCAGC  
AGTCCGCCACCCTGCTTTTGAAGGCCCTCTGAGATCACTAAAGAGGTGATCCCCAAAATATATCACCTCTGGA  
CCTTTCCACTTTGTAATCTGCAAGAACGTTTTAAGGCATCCATGGTAGTAAATTTTACCGGGAAAGAAAGCAT  
CAACTTTTCGTAAAAGCCAACGTGTCCTTCTCCACATCATAGCAGC

>TCONS\_00007834

CCTGCAACATAAAGCGCATCCCTCCATCCACAAAATAAAAAGGGAGAATTGGTCAACAAGAAAAGTTTCTTTC  
CTTTATCCTTCAGCATCCTTAGAAAGCGTAGTAGCTGATCATTCTTTACAAGGTATCTAGGGGGATCAGCAAG  
TATTCCTCTGTGAACTAAGCCGCTATTATGAACATACTGTATCGCTCGATTACATCTTCATATACATAACGAG  
CATCAAATTCCAATTTAGCATCAACAAAATGTTGCACAATGTCAGCAATAAGGCATGCCTCACTAAAACAGA  
AGAAATCCATCAAACAAACTAGTTCCCGCGCTTGATCACGGCCAATATGTCTTGTACCATACATCTCATCTAT  
TTCTTCCTGGCTGAG

>TCONS\_00007835

CTTTGATTTGTCATAGTATAACCCTCTGATGGGAAAACCTAGGATCATACTTGAATTCCAAGCAAGTATCAGGA  
TATTTGAACTCACTAACTAGATGCTGTTTAGCAAGATCATAAATCAAGCTCTGTAAATTGGAGGAGTAATGCC  
CCAACGTGTAATCATAGTCGAATCCATAGACTTCTATGCTGTCCAACCGCACGTTCTTATTAACATATACACC  
TTTAGGATTCATTTTGGGCATTTGTTTCA

>TCONS\_00007919

CCCCGACCCTGTTCCAGTGGGATCTCCAGTCTGCGCAGTGAAATCCTTCTGAACCGTGTGAAACAGGCAGCC  
ATTGTAATACTTAATCTTGACAAATTTCAAAAAATTCTTGATGTCAAAGGGCAGCGATCTGTAAACAAGTCC  
AGTACCATCTCCCCAAACTCGTCACTATCATTACCGACATTATTTCTGTAAGGACGGAGGGAAGAAGGAGA  
GGAAAGGGTTGGGAAG

>TCONS\_00007987

TTTTGATCGAATTCCGTCTAGTAAGCCTCGAGATCTTACAGATGCTGTTGAGAATCGTCATTAACCAATCATGT  
ATCGGACGCACCATCCCTTGAAGCGGATTTGACCCGCACCCTCTTTCTTTTTCTTTAAATAAAGAAAGTGGTG

GCTAGATTTCGCGTTCCCTTTCCAGACTATCAAGGATTTCAAAGATCTTTCATACTGTGCCCAATCCCGAAATTG  
GTTCTATACATATGACCAGCAACGAGAAAAATAAATGCAATAGCTAAATGGCGATGGGCAATATCAGTCAG  
CCACAGACCCCCAGTTACAGGATCTAATCCTCCACGAAAAGTAAGAAATTCCGCATATTTTGACCAATTCAA  
GGTGAAAAATGGGGTTGCTCCCTCGGCAAACCTGGGATAAAAGTTGAGCCAAAAGATCTCGATTCAAGATAAAT  
TCATGAGGAAGTGGTAGCTCTTTAGGATCTACTCCAGCGTTTAGAAATTGGTTAATCGGTAAAGATAGATGTA  
CTTGATGCCCCGCCCAAGAGAGAGACCCAAGTCCTAGTAGCCCTGCCAAATGGTGATTCTGGTAGTGAAAGA  
AAGCCCATACCTAACTCGCTATGCTTGGCGCGGTCCCGTGCTACGCTATTTGATCGAGATTGCAAATACCCTT  
CCTCGCCGCCACCTTCCTTCAGAGGTAGCCCGATTGGAATCTTGTACACTTTCCTTATCTTTCTTTTATTGATCC  
AGCCTATACCTATTTCTCTTGCTTCGCGCGGCCGGGCCTCTACCTCATAGAAAATCCTGTTTAGGAAGCTAGC  
GCCCCGCTCTCGCTCCAATATACGTGTAGGGGGAAGCACCAATGAAAGTGAACCTTTATTGTTTCCTTTTCTCTT  
CGAACCGATTAGAAGGA

>TCONS\_00008132

TTACCCTTTTTATTTCATATCTGTGATTGAGTTCGTTATGGGATGTGTTCTTGGAGTTAAATTGGACTACTTTCTA  
CTGATATCCGCCATAGGTGTTAGAAAATCTTATTTTATAAGGTCCAATGTCACGTTAGAGAAGTGTATCTTTGC  
AAGGGATACAGAAATCCTAAGTCTAAACTGCCAAGTTTGATAGAGCCAGAAATCTCTCAAATGCCCAGAAG  
CCTTGAGCGCGAG

>TCONS\_00008148

GAATTCGCAAAATCCTCTTAGATCTATCATTGGAGTTATACGCTCACAGGAAACAAGCGGTAGATATTAGAT  
GGATCCATAACAAAGCTGATTACTTGAAACAAATTAATTCACCGCAGTCTCCGATTGAGTTGATGCAAGG  
CGGGACCAAACTTCGTCATAAACAACATGTATATCTATCGATACGCCACCGTCACCGTCAGCAGACGTCAT  
TGTCGCCGCGGAGGCAGGTCCCC

>TCONS\_00008228

GTCGCATACTGTGTCCACTTTTTCTGTTTTCCCTTCGCATTTGACCTTTCCTTTTTCTCTTCTTTCTTTTGTTT  
CTTTCTTTTTTACATCACAATTCCTTCTATCCGAAACCTCAATTTCTTCTTCGAAAATTAGCGTTGTTTGTTCT  
GCTGCCGTTTATGATCGTAAATCAAAAGCTTTCAATGGTTTCTTTATGTACCCATCAAATTTGTTATTTTTTACA  
TCAAAGAGTTGATCTTTACAAGATTCCAG

>TCONS\_00008248

CATAATACCTAAACAGAAGAGAAGAAACCTGGAATTCTTCTCGTTTTTTAAAGAGAAATTGTGGTGAGGAGC  
TGGGGACATGATAGAAAGAAACCGCCAAAGAGGTGCAAACAATTTGAGCTCATTCCTTAAACTGCCACTCT  
CGACGACACATGGGGCAATGAGCCTGGGAAGTTTGTGAGTTTACCCACTTTAGAATGCAATGAAGATGAAAT  
GCATGGTTGCAAGCACCCCAGATTAGCGGGCAATCATCCCCAGGGAGTTTACAATCAGGACAGCAACCATCA  
AAAGCCATCCTACATATCCCGCAAGTTTCATCCTGAGCATCCCATGTCCATGAAGCAACAGCGTGCCATTCTA  
TTCATGATTCCAGCGAAGCGCC

>TCONS\_00008255

ATCAGGAATATTATTCTCAGGATGGCTATTAAACTTCATCAACCACTCCGAAGTTGTCAAATCGGAATAATTC  
GTCGCAACCTGACCATAAGTATCTCCAGATTTAACCTTGTACGGAAAAACATGACCTAAAAACTCACCGTCC  
AAACAATCACAATAAAGGGTATGTTAATTCCTTGTCCAGCTATGACACTGTCTTGATTAGGTATGTTGTCATT  
GTTGTTGTAGTCGATGATTTCTTGTCTAGTAGAAATGGAGAATAACTGTGATATGTGAATAAGATTTGTCCCC  
GCCAAACAAAGAATGAACCTAAAGCTAAATCGCACCCCTTTATT

>TCONS\_00008264

AAAAAAAATATGGCGAGCAAGAATGAAGTTGTGCCCGTTGAGCTTCCTGCTCCAGCTGGCTGGAAGAAGAC  
GGTGGAGTGACAACCTTGGAACCAAGGATCGAATCATAAGTGTTGGTGAAGTTACCCGGTACTTCTGTTGG



TAGGAGGTAGCAAGTGCTTGATGGATTAGTTGAAGATCGCATTGACTGGTGTATATACTACCATCGAATGACC  
CAAAGAAATGAAAAGACTGAAAAAGCAGCAGATGGACTCTTGATAGGTGAAAAGT

>TCONS\_00008339

ATGGGGAGAAAAACAAGAGATCCAGAGCTAAAGAATTATAAATACTAAATTTGAAGTTGACATGAAATAA  
CACAGGAACCTTTACATAAATCCTTTGTTGTCCTTGAGCATCAGGTAACTGATATCTTTATTGATAAGAGAT  
TCAATCTACAGCTGATCAGCAGATGTGAACCAGTTCTGCAAGCCAAACAATCAACTACATGGAGCCCAAAAC  
ACAAAGTAACATAATTCAGCAGCCATACTATCTCATCCAATGCGGAAGAACAAAAAGATAATTCACAGTTAC  
GGAGCATAACATGCTCGTCTTCTACTCTGCTCTGGACTGGCCAGCACGAGAAGAGAGAATGATGCCAACAAT  
AAGGCCATAAAGAGCCAGGGCTTCAGCGAAAATAAGAATCAGAATCATCCCAACAAAGAGCTTTGGCTGTT  
GCGCATTAGCTCTAACACCAGCATCACCAACGATTCCGATGGCCATACCAGCAGAAAGTCCAGCAAGGCCA  
CAAGCAAGACCAGAGGAAAGGTGAGCATAGCCATCAAAAAGATAATAAGACTTGGTTTTTGGGTAAATGCC  
AGTACTGATTATCACAGCTATAATCAATCCGTAAATACCCAAAACCTCCAGCCATAACCACGGGCACAATAGA  
CTTCATCACTAGCTCTGGCCTCATCACCCCATAGATGCCACTCCTACCCCACTCTTAGCAGTACCATAAGCT  
GCCCCCATAACAGGAGAAGACTAAGGCAGCGGCAGCGCCGAGGAAGCCGAAGAAGGGAGCCGTTTCATCGC  
CGCTGAAAGTCGACGCCATTGTTTTTGCGAAGTT

>TCONS\_00008342

CAAACAATAAGTTACCATTATCCAATTACATGTCAACAAATTTTCAGAATAGGGGAAATATGGTAATGAAAG  
GACCAGAAAGAAATAGGGCAACCGAAGAGGGGAGACGTTTATAGGTGCATACAAAATATTTGCTCCTCCTTC  
TGAACATTCATTCTCGAGAGAAGCTGAGAGGAAAGAGGAGCAAATAGAATAAGGAACCTAGAGTTCGAGC  
ATAAGTTCTTCTTCGAATCGGAGAAATAGTGGAGAATGTATGGGGCGACCCGAATCACGGCGACCCAAGTA  
CCAAACAAGGCCACGTGTGTCTTGAGCTGCTTCAAAGCAGCTGCTTTGTCAGGTTTACGCATGAACAATCCTG  
GAAACATTGTTGCTTCTTTTGCTGCTCTGAGATTGAGATTGAACGAGCCAAAAACCCTAGGTTCCGACTGAA  
AAGTGGGTAACGGTGAGGTTT

>TCONS\_00008470

AAATCAAGAAAGAAAATAACCCCTGCATTTTACTTTTAGTTAGGTAGGATTGGCTTAACAATCTTCTTCAAAC  
TATACTAAACAGTTAGTTCCCACTTAATTACCTCCACAAATTTCCAAATTTAACTTGGGGTGCTGGAGGTCTAG  
TACAACCTGGTTAATTTTTACTCGGCTTACCTTCCATTATTAAACACCTACTTCTAGTGAATTCTG

>TCONS\_00008502

TCATAGCATAGACAAACAAAAAGAAAATAAAGCTACAATGTCAGTTTTCTTCAACGAACAAAGCTGTTGCC  
CAACAAAATTTCCCAACTCAGCAATGAGATGTCTGAATTTCTTAGGAGATATGTGAATTTCTCTAGGCCTCTC  
TGCGAACAAAGTAAAGCTTACCCATGACATGAAGGATGGCAACAAAAGCTATGAAGCCAATACTCATCACA  
AGCACAACGTTGGGGGATATCTTGAGTCCGGGGGAATCATCAGTGTAGAATTGGAGCATGTTACCACCTGCT  
CCTCCTGCAGCTCCACCACCACCAGCGGCCTTCCTTCGACGCAGGTTAGCAGCAGCTGCTGCAGCAGTCCCTC  
TTTGTGGTCCACCTCCACCCAAAGCCATTTCTTTAGAATGCTGAGATTAGGAGAAAAGTCTTCCCGATCTGAA  
AGGAGGAAAATGAGAGAAAAATTTTGACCTGTTTTCTTTTAATTGG

>TCONS\_00008716

ACAATTTGATTATTTGCAACTCATATACAAAGTAATTCCATCAAAGTGAACCTCTAGCCAGAGACATATTCTCA  
AACCACCTCACTGGGGGAATTCACCAAATGCAATTATCAACATGGATTCCGAGTGAACCAAATTGGAGGAG  
GCCAACGAAGCATAGAATGTGAATTGCGAGGATAGCATGACAATGCTTCAATCCTACCATCCTCTAAATTGT  
AATACCTTAGATCATGATTCCCATTGACACCATCATAATTAGCCTCACAATAATCATCCGTAAAGTAAATCCT  
ATTTCTTCACATCCAGGATAATCAGAAGCCAACAGCGCCAATGAAGAATTCTCTCCTAAAAACAACATCTT  
CTCACCCAAACTATCCACCTTCTCCACCTCGGCCCTTCTAAAACCAACCTAAACACACGAAATTCAACCGTC

TTATACACAACATCAAGCTGATGATACGCAGCATCAGTATCAAGCTCCAAAGACCTAGTCACCAGTAAAAGT  
TCATCATTCGTTTTTAACCAAATACTGTATATCACCGCCAATTTGCCTAGGCGTTTCAATAAATGAAACCCTAG  
GCGAATCACCCTAACATCACAACTGCAATTGATCCAAGTTTATGAACAGCATAAAATAATCCATCAAAAT  
ATATAACATCCTCAGCAAAAAACCGCGCTTCATCAATAAATTTCCA

>TCONS\_00008723

AAGAAAACACCAAGCATCAACTCCATTATTTAACTCGTCCAGTCATCATTCACGAGCCAACATATCAGTAG  
GGAACGATCTTCCAATGTTGGTTCCGGTTGTCTCCTTTCCACCATTCCCAGAGAGCAACAATGGTCCCGTCAC  
GGACACCTCCATGTTCTTTATCAGCATTCCATGCATCTAGATTGAGGCGAATGTTATTAACCATCCTAACTGCT  
CGATAACCATCACTCACGTCTCTGCTCTCTGTCCACAAGACTGATGCATCAAGAACATCAGGGTTCGTAAGGG  
GTGAGCTGCACAGGGTGAGAGGCGCCAACAGAGTGCTTCATGGCCAGTCCTGCAGCTTTATTAACCAGAGCA  
AAGCTTGGAACCCCTCTTCATCCTTCACTTTAGTGCTGTACTTCTCATCTTTATACCAGTGTTGAAAAGGATC  
GGATGGATCAGAAGAGGCAAGAACGACTTTGCCGTCACGGATAGTGAGAGAGTAATTGGGATCAGCCTTTGT  
ATAAACCTAAATGAAGGCTTATCGATGAGCTCTGGATGTGGTGAGGTCTCATGGTGGAAGAATGAAGGCAC  
ATGTGGTTGAAAACGATGATGATCATGATGACGATGACCGCTCTCACTCTCACTCTCGTGAGACACGTGTTCA  
ACGGAGGAATAACTAGGTGGTTGCGGTGGTGGTGGGCCCTCATAATAAGGCGGTGTACGATTATAAGATCCA  
CCATAGTTCTCCTCCATTTCGCGGAGGCGGATAATTAGTCCGACCATAACTATCCTCCATTGACGGTGGAGGAT  
AATTAGTCCGTCCATAATCGTCCTCCATAGGTGGCGGTGGGGGATAATGAGGACGGCTATAATTGGGCTCCAT  
CGGTGGTGGTCCACCTACATGGGAAGTGTGATAGACAT

>TCONS\_00008864

TTCAGGCAATGGTGTAGACCCAGTGGGTCGCTTTTCGTGATTTTTTCATGAGCAAGTCATTGTTTCGCTCAGCCA  
CAAGGAGAAGAGAAATCAGCTCAGAGTACTTTTTGAAACCTTTCTCTCTGTACTGCTGTTGCAGAACCATATT  
GGAGGCATAAAACGTTGTAAACATTTTTTCAAGCATATCATAATCACTGATAGTATCTCCACAGAGTTTCAAT  
TTAGAAGTAATTCTGAACATCGCAGAATTATATTCA

>TCONS\_00008872

TGGCTCAATTTTATTCCCACTTCATTGCACGGGTGATTTCCCATTCAACTGCGTCATGATCTTGATCCATAAGTC  
CGTCAACCTTTTTCTGCAGTTCACCAATGCAACTTTGAATGTTTCGTGCTCAAGGGATGATGGGTACATTATC  
TGCTCTTCCTCTGGTAGTTCGCAGAATTCATCAGGAGTTATTTGCAGCAACTCCACAGCAGTTTGACCAGTAC  
ACCAG

>TCONS\_00008900

GCAGCCTATTGTATCACCATCGTTTTTCAGTATCAGTTGAGCATAGCCTAGAAATATAGAAGAATGAGGCATC  
AGAGGGACTGGGATTTTCTGTAAAGGGTGGTTGCCCCCTCTCTGCTATGCCCATGATTTCTCCATTTATAACCAA  
AAAAACAACAGCCCTTTCAAATAAACAAGAAAATAGAAAAAAGAAAATAGTTCATCCAAACACACCCTA  
GTATATTGCTCTTCCTCTT

>TCONS\_00008910

CTTTTTTTTTTTAAAACAAAAATCAACAACCCTTGAACCTAATGGAAATATACTACTATACAATCATTTCTTGAG  
GATCAATCAACAACAACAGCCAGATCTCTCTTTCTCTGTCTTTGTTTCTGTGATTTTAGTTCCTCTTTTTTGATAC  
GTAACAATTGAGGCAGTGATGATATTTATCCGGATTCTGGGCTAACTGGATCGGGCATAGAGACTATCCGAC  
CCGTATCTTGCCCTGGCAAATCACCGGACGGCCGGCGATTGAAGGTTTTTTCTTTGCATACAACCGGTGATTT  
TGCAGTCATGGCGTGGTCGCCTCTCTTTTCCGCGATCTGTCTTTGCAGATCTGAGCCTAAACTACTACTTCTTT  
GAATTTCAACTACTTTTTGTTCTTTTAAGTTTTAGCTTAAGCATCAAACCAAAAAGAATGAGGATTTTGACGAAG  
ATTGAGCTCTTATGTGGTATGGTTATGATACTTCTGAAATCAAAGCATAATCTACCGTACGACTCTATGTGA

>TCONS\_00008942

TTGATGCAAGTAGTGCACGAGCTATGAGAGGCCATAATCTACCACAGTCTTCTGGCTCAACTCATGCCCCGA  
GTCTTGAAGGAAATACCGGTGATGCAATTGGAAATGGTGGCCACAAATCAATTTGATTCCCTTAAAGTGA  
ATGGTGAAGACCTTTTGAACAATTATGATGTTTTTTTTATTGATACTATAAATATGAATACATTTGGTTTTGTCTG  
AGGTCTTTGCTAGT

>TCONS\_00008951

CGGAATTCAAGAAGAACATATTTGCTTGTTGAAGATGTTGTTGTTGCTGCTGTTGCTGTTGAGTGTCAGTA  
TAGCCTATATAGTTAGGGTTCATCAGATAAAGTGTCTGCAGACCATCAGCTTGGATTTCTGAGCTCCCTTGAT  
AGTACATCGCCATAGATTTTACGACCTATATATAAAAATCTTACCTCACTCTTAAATGCTTAACCAATCAAGA  
AATTAATAATCGTTTTTTTTTCTCTCCAATATATGAAACTATTTCAAGAAAGCTTAGGCCATCCAAATTTGGAA  
CTCACCTGCAGATAGTACTGATGATGGAACCTTCTTGTGAGATTCTTAAGTTTTCTGCAAACCTCCACTGCACAA  
AAGGGGAATATGAATAAAGAGATTTTTATTAGTGCTAGTCTCACAACATATCCTCC

>TCONS\_00008952

CGGAATTCAAGAAGAACATATTTGCTTGTTGAAGATGTTGTTGTTGCTGCTGTTGCTGTTGAGTGTCAGTA  
TAGCCTATATAGTTAGGGTTCATCAGATAAAGTGTCTGCAGACCATCAGCTTGGATTTCTGAGCTCCCTTGAT  
AGTACATCGCCATAGATTTTACGACCTGCAGATAGTACTGATGATGGAACCTCTGACAAATATATGAAGAATG  
TATGAAGGATCTTCAACAATAAACTAAACAGAAAATAAATTTAATAAAAAGATGAAGAAAGAAAAGTAATA  
TAGAGGGAGAGAGAGAATGATTTTGAGAAGTTGCCTTCTTGTGAGATTCTTAAGTTTTCTGCAAACCTCCACTG  
CACAAAAGGGGAATATGAATAAAGAGATTTTTATTAGTGCTAGTCTCACAACATATCCTCC

>TCONS\_00008971

TAACGAAATTGTTTCATACATTGGTTCGATTTTTCTTTTTGTTTTAGGTGGAGTTTTGAAATTAATCGAAAGTTGA  
AGAAGGCATTGCCTATTGAAGATAGTGCGTTTTACAAGTCACAAAAATGTCAGATATCAGAAAATGGTTCAT  
GAAGCAGCATGACAAAGGTACGGGTAATGGGAGTATGTCCAAGAATAGTGCTCCAGAAAAGCCTTCAGCAG  
AAAAGCCTTCTCCAGGAAACCTGGTAAGTATTTGTAGCTAGATCATTCTTCCAATTTCACTTGCTTTCTCGTT  
GACCTCTCGTATGGTTTAAAGTGTGTTAATGTAGTTACCTATTTCTTGTTCCTTGGAACCTGTTCCGATTGCCTG  
GAATGGTGGGGCTGGCTTGTTGTTTCTT

>TCONS\_00009131

CTGAGGTAGGTGTTTTATTTCTGATAACTGAGATTCATGCTTCTTGTCTTGTGCTATAATCTGCCTTGTTTGAACA  
AGTCTGATGCTCATCTCTTGTTGACTTCTCAAGATTTTGTGAAGTAGCATTAGTTTCCACATCCTTCTGTTTATC  
GCTGTTTTTTTCTTGATAATTTAGTCTTTGCTGAGGTGGTTTCCCTCATCAGGACGAAGTGTGGGATTTTGTTT  
ACCTTGTTTCATTACGCTGCAGTCTAAGATCATCATCCCTCTGTTTGGAATTGATATCTGCCTCTGCTTGACCAAT  
CTCCACAATCTCTTCCATTCCAGCAATACTGGAAGAGACGGGTGACGTGACCAGAGACATGTAACTCCAGC  
TTCCAGAAGTTTCTTAACTCCCTCTCCTTCTGCAGTTGCTCCTGAAGCTGTGCCACATCCTTCTCAAGTGCCA  
AACGACGCTCACGCAATGCATTCTTCCGATTCTCCATACTTTCTTGCAGAAGGGCATTCCCCCTGGCCTGCTCT  
GCAATTTTGGATTGCAAGTCAGTTTTAGTGACCTCAAGCCTTTGGATTTCAAGTCACGTCATCGAGAGGGACAT  
TGATAGATTCCATCGAGAGGTTCTTCTTGGCAGGAGAGCGCCCCACAGAGCAGGGCGCCGAATGCTTTGGG  
CAGGACTACTTTGCATATCTATTGACTTTTGGGAAGTAGATGTTTTTCCAGTTTCAAGCTCCCAATTGTTACCA  
CATTCATTTCCCTGCGTCCTTGAATTTTCACTTTGAACTGGAACACTCTCGCTTCCCTCCACTGGATCATGC  
TGAATAGAAGTACGAGGTGGACTTGTAGGCAAGCACCTACTGGCTTCGTTGTCTGCTTCGGGAGACTTGGA  
CCAGATTTAGAACTTGAGAGCTCTGCAACATTAATCTATATCCTTAGGGAGAAGTGACAGAAGTTGACGTG  
GGGAGGAGCAAATATGTAATAAATAAGTTCAAGAGGACTGCATGAAAGCAGAGAGAACTAACATTATC  
AGCAAGCTTTTTTAGAGATTTTCCATTTCTCAAAATAGTCTTCGACTATATTCAAGTAATC

>TCONS\_00009132

CTGAGGTAGGTGTTTATTTCTGATAACTGAGATTCATGCTTCTTGTCCTTGTCATAATCTGCCTTGTTTGAACA  
 AGTCTGATGCTGAAGATGTTTTATTTACAACCTCATCTCTTGTTGACTTCTCAAGATTTTGTGAAGTAGCATTAGT  
 TTCCACATCCTTCTGTTTATCGCTGTTTTTCTTGATAATTTAGTCTTTGCTGAGGTTGGTTTCCCTCATCAGGA  
 CGAAGTGTGGGATTTTGTTCACCTTGTTTCATTACGCTGCAGTCTAAGATCATCATCCCTCTGTTTGAATTGAT  
 ATCTGCCTCTGCTTGACCAATCTCCACAATCTCTCCATTCCAGCAATACTGGAAGAGACGGGTGACGTGACC  
 AGAGACATGTTAACTCCAGCTTCCAGAAGTTTCTTAACTCCCTCTCCTTCTGCAGTTGCTCCTGAAGCTGTGC  
 CACATCCTTCTCAAGTGCCAAACGACGCTCACGCAATGCATTCTCCGATTCTCCATACTTTCTTGCAGAAGG  
 GCATTCCCCTTGGCCTGCTCTGCAATTTTGGATTGCAAGTCAGTTTTAGTGACCTCAAGCCTTTGGATTTCACT  
 CACGTCATCGAGAGGGACATTGATAGATTCCATCGAGAGGTTCTTCTTGGCAGGAGAGCGCCCCACAGAGC  
 AGGGCGCCGAATGCTTTGGGCAGGACTACTTTGCATATCTATTGACTTTTGGGAAGTAGATGTTTTTCCAGTT  
 CAGCTCCCAATTGTTCAACCACATTCATTTCCCTGCGTCCTTGAATTTTCATTACTTTGAACTGGAACACTCTCGC  
 TTCTTCCACTGGATCATGCTGAATAGAAGTACGAGGTGGACTTGTAGGCAAGCACCTACTGGCTTCGTTGTC  
 TGCTTCGGGAGACTTGGAACCAGATTTAGAACTTGAGAGCTCTGCAACATTAATCTATATCCTTAGGGAGA  
 AGTGACAGAAGTTGACGTGGGAGGAGCAAATATGTACTAAAAATAGTTCAAGAGGACTGCATGAAAGCAG  
 AGAGAACACTAACATTATCAGCAAGCTTTTTTAGAGATTTTCCATTTCCTCAAAATAGTCTTCGACTATATTCA  
 AGTAATC

>TCONS\_00009136

ATAAGTTTGACCACCAGAGTATTATGAATTTTACCTGCCATGTCCAACAGCATCAAAGGGTGAGAGAATATC  
 CACAGAGGCATTAAGAACAGCAGTAGCTTGAGCTCCAGCTGAGAAAAACCTAGCAGATACTATCTTACCATT  
 GCAGGAAGTTTCAGGAAATAAAGGACCTTCCTCACATGCTCCAGAAAAATGTTGAGGAGTATAATTAGTAGT  
 AGTTGTGGGATCATAAGCAAAGCTGGGGTGGTCTGGGTTAATGCCAGAATCAACAAAGCCGATCACAATTCC  
 TTCCCCGATGTTTCTATCTCCTCCTCCTTGCGTCCATACTGCCGGTATCCCAGAACTGCGGAGTGTAAGTAG  
 TCATCAGTTTAACCTCCTATCTTCCTCCACCAACTTCACTCTTGGAGCATTCTTCAGGTTTCCAATCTTCCAGC  
 TCAATTATATGATCATTGTTGGTGTAGAAACATCAAAGTTGCTCTAGAATATATCACTCAAGTAACAGAACATCA  
 TTAAGGAGCCGCGTGACAAATGGAAATTGATGTGGAACACCTTGAATTCAGGATAATACAACAAACAAG  
 TAACTCAATTTATAGCAAGAAGACAACACTCCACTTCATTAATACTAAGCATATACCAACAGTTGTCTAG

>TCONS\_00009267

CTAAAAGATGGGATGGGTGATCCATAAGATCATTGCGGAGGTTTCATCCCTCAGCGTGGGGATCTTCTGGAA  
 ATAAAACTTGTTTTGTTGAGGCAATTTCCCTCGTCGCTTACCCGCATTTCTCTTGGTATACCCACCTGTGTGCC  
 TCCTAATTCCGTGAAGTCCTTGAGCATGTGCGATTTATTAGGATCCTTGTCAAGAAAGAAGTCAGTCCCTT  
 ATTCTTTATTTTATGTTAAAAGGTCTGGACTCGAAGAGGG

>TCONS\_00009314

CAGAGTCAGAACTTCTTCTCAATATGTAGCTGCTTATAACACAAAGCTTCTTGATCCTTTCACTCGTTACAC  
 TTTTCATTGTCAACGAATGAATTAAGTGAGATGATACCAGAAGACCAGAAAAAGTTGAAAAGAGAGTGAGA  
 GAGAGCAATCGACAAGATGTAAGAAGAGTGAGGCTCAGAAATGCTCAGCTAAGTATAGGGGTATCCTTTAG  
 AACAGTGGTAATAACTCATTTGTGCTAAGCCTAAATGAGATACTCGAAATGCTTGTCTTCTCTTGTAACCTCA  
 AGGTTTAAAATAGTTTCGTTTCGTTTTGGAAACCTCTCTTTAGGTTAGACATAAAAACAAGAATCAAATTTGCT  
 ACAATTTGACGAATTATGATCAGTTTTTTGCTAGCAGATATTAATTTATCCTTAATATTTATTAGAATACTTTGT  
 CGGATGACAAATTCAAAGACATCATTACATCATTATGTGAGTGTGATTCAACTTTGAACCATCTATTGAGATT  
 TCTGTTTGCTGCTGTGTGCCATATGGATACAAAATCTGGTTTTTTATCACTTGATAACTTTAAGACAGCACTCTC  
 AAGTATTCAACGGCAACCCAAGTTGGAAGCCTTGAAAGGTATGTCATTATGTATTCTGTGCTGAGTGTGACT  
 AGCTTC

>TCONS\_00009478

CGGCTGTAAACCGATTGGTCGTAGGTTCTGAATCCTACTTGGGGAGATTTTTTAGTTATCGCTTTTCTGACCTAG  
CGACCCCTGCCCTTCTCCTTTGTTTCTAAACTAGCAGAATCGTGGGACATCAAAAGCGGTAAGTTGATTGTTG  
GTTTTTATTCTCACTCTCGTATAGGTTAACTTGGTTCGTTCCATTCTTAGGGATAAGAAGGATCCACTGGAAA  
GACTGGAGTAGTATCTTCATTAGCCGGAAGGAATTAGTCTCCACTAGCGTCATTCTGAAGAACGAACAAGAAA  
AGGGTTACTGTTTAGGATAGATGGATGTGGCCCAATGGCTAAAGCTCTGCCAGCTTCTTGTAGACTGAACTCT  
CTTCTCTTTAGGCTCCGAGTTCTTTTTTGGGGGGATGGTCTAATTTACTAGTGGCAACGAAGTTCTTGTAATTA  
GCAAGGGGGAAGGAGGATCTCCACTCATTTTATTTCATTTCAGTGCCTGCGGTGAGGCGCGACCCACAACAAAC  
GAAGGGGGAAAGCTTGCTTTGCTTGCTGTAGCCCTATTTTAGTAGATTAGGCTTGTAAGCGTAAGCTATATTT  
AAGTAGGCTCGCAGCTTCGCTCAGCAGAAGAGCCTGACTTTTTATTATATTAGTAAAGCGCTAGCGCCCAACC  
TATACAAGGGCTTTGAAGGGATAGGGGAAGAAAAGAAAACAAAGAGGGTCATTTTCTTTTAGGAACATGGC  
TCCTTCATTCACTTGCTCATGAAGTTCGAGCTTCGCCAGAAGCGACGAGGGGGGGCTGGGGAAGGCCGACGA  
CTACATGAGGGGGAAGCTTTCTGTAGAAGCTTTACCCCTTGCTTTACAGAGATAGTTATGAAGTACTAAATGA  
CTAGATTCTCCCGGAACGCTAGCTAAGCTAATCGTCTTAGTTCCTTCAATTAAATCAATAAGCTTTTTGATTG  
ATTCAGGGCGTCGCGGGAATCTATAGATCGTAGTTCGCCAACCTCTCTAACTAACATACGATACAATTT  
CACTTCACGGCACGGCCAAAAAAAAGAAAGAGCTTCGCTCGGTTGGCCTTCCTACGCTGACGAATGCCTCTT  
TTCTCTTCTCTGAAGTCTACAACAAACAAGTGGGAGAGGCAGGATTCGAACCTACGTAGAAAACTTCAACA  
GATTTACAGTCTGCCGCTTTTGACCACTCGGCCACTCTCCCCTTCCCGGGCCGAGGCCCCCCCTCAATGGGTTCT  
AACGAGAATAGAAGCGAGTCGCTTCCGGCCTGTCTTGTAGTCGTAGTCTTTTAGCTTATGTAGTCGTCGGCCTT  
CCTACACGCATGCGTCCGCCAGAATGCCTCCTTGTTTCGGGACGAAGCCAAGCCGATACATACGATAGGCGA  
AGGAAAGACCCCCATTTATAGCGCCTGGGGAACGCAAGTTTGATCGAGGATTGGAGAGGAGAGGTGGAAG  
AAAGGGCTCGGGATGGATTTAGGAGTCTTTGTGCGAGCCGTATGCGGTGAGAGTCGCACGTACGGTAACGAG  
GGGGGTTTCGCTCTATACGTGTAGTGTGGTGCTTAGGCCTACCCACCCTATTTGTTCCATGATCTATGGGTCTA  
CTGGAGCTACCCACTTCGATCAATTAGCCAAGATTTTGACCGGATACGAAATCACTGGTGCTCGATCTAGTGG  
TATTTTTATGGGGATTCTATTTATCGCTGTAGGATCCCTATTCAAGATCACTGCAGTTCCTTTTCGGGCGGCTGT  
AGGACGGCC

>TCONS\_00009511

CTTTCTGCTAAACAGGATGGATTGAACTCATAATTCATTAGATGCTTTTTATGAATGTCAACTAAGTATCGTAA  
GTAAATTGCTCCCGGTTGTTCAATCATTTGATAACCAGAGTCATTCTTTGATAAACGATCACTATGAGTCAGA  
CTCAATAGAATTTGATCAATCCTATTTTCTGTCGTTAAGGTGGAGAACTGAACCAAGAATTCTCTTTCTTCATC  
ATCAATCGAATCACTGTTTCGCGACCCAGGATTCTATTTTATCATCAATCCAATCCCCGTTACGTTTTTTCTTTT  
TCTTATCAATGAATAGATCTCTTTACTTGTATGACTTAGATGTCTCGTATTTCTCGAAAAATGATTTCGATTGATG  
GAATTTGGTATGAGATCGATGATCTCGATGAGATTGATATTCCAATCTTTCTTCTTAGAACGTATTGATTGAC  
CCCATAAGCGGGACCAAGCATGTTGCCGCCAGAAGCAGAACCCCGTATTTCTTCTAGAGAATCCCCTAATTG  
TTC

>TCONS\_00009516

CGAGTATCGATGTAGAATTCAGTGTCAACTCCGTCAATGATCCTATCTCTTTCAAGAACAAACTTCCCTTCTTT  
ATACTTCTGGCTTTCTCATGTGCAGACTCATATTTCCAGCCAACAATTTGCCACAACAGCAACAAAATATG  
TCCGCTACCGTGTGCATCCCAGAAAGCATCACCTCTCTTCATGAGGTCCAACAGTTACATTCACCGCTTTATT  
GAATAGGTATGCTTTTCTCTGCGGCAATGAAACCCCTGGAAACAAGGTCGTGACGAAGGGCAAGATGGGT  
TTTGAGAATTTGCACTTATATGTCCTACCTTCAAGATCTACCACAAATATCCTTCCCATTTCCAAAGATTTT

>TCONS\_00009575

TTTTTATATCATTCCTTAAGTCCCATAGGTTTGATCTTGTAGAATCTGACCCATTTTCTCATTGAACGAAAGGT  
ACGAAATAAATCAGATTGATAAAAGTACCATGTGAAATCTTCGGTTTTTCCCCTTCCTCGATCCCTATCCCATA  
GGTTAGGTACAGTGTGTTGAATCAATAGAGAACCTTTTCTTCTGTATGAATCGATATTATTCCATTCCAAATCCT  
TCCCGATACCTCCCAAGGAAAATCTCGAATTTGGATCCCAAATTGACGGGTTAGTGTGAGCTTATCCATGCGG  
TTATGCACTCTTTGAATAGGAATCCGTTTTCTGAAAGATCCTGGCTTTCGTACTTTGGTGGGTCTCCGAGATCC  
TTTCGATGACCTATGTTGAAGGGATATCTATCTAATCCGATCGATTGCGTAAAGCCCGCGGTAGCAACGGAAC  
CGGGGAAAGTATACAGAAAAGACAGTTCCTTTTCTATTATATTAGTATTTTCTATTATATTAGATATATTAGACT  
ATTATATTAGATTAGTATTAGTTAGTGATCCCGACTTAGTGAGTCTGATGAATTGTTGGCACCAGTCCTACATT  
TTG

>TCONS\_00009576

TTATTCTCAAAGGATAAGATTATTCTCTTTACCAAACATATGCGGATCCAATCACGATCTTATATATAAGAAG  
AACAAAAGATCTTTCTTGATCAATCCCTTTGCCCTCATTCTTCAAGAATAAGGAAGATCCTTTTCAAGTTTGA  
ATTTGTTCAATTTGGAATCTGGGTTCTTCTACTTCATATTTATTTAATATGAATATTTTCCCTCTTTTTTTTTATATC  
ATTCCTTAAGTCCCATAGGTTTGATCCTGTAGAATTTGACCCATTTTCTCATTGAACGAAAGGTACGAAATAA  
ATCAGATTGATAAAAGTACCATGTGAAATCTTCGGTTTTTCCCCTTCCTCGATCCCTATCCCATAGGTTAGGTA  
CAGTGTTGAATCAATAGAGAACCTTTTCTTCTGTATGAATCGATATTATTCCATTCCAAATCCTTCCCGATAC  
CTCCCAAGGAAAATCTCGAATTTGGATCCCAAATTGACGGGTTAGTGTGAGCTTATCCATGCGGTTATGCACT  
CTTTGAATAGGAATCCGTTTTCTGAAAGATCCTGGCTTTCGTACTTTGGTGGGTCTCCGAGATCCTTTCGATGA  
CCTATGTTGAAGGGATATCTATCTAATCCGATCGATTGCGTAAAGCCCGCGGTAGCAACGGAACCGGGGAAA  
GTATACAGAAAAGACAGTTCCTTTTCTATTATATTAGTATTTTCTATTATATTAGATATATTAGACTATTATATTA  
GATTAGTATTAGTTAGTGATCCCGACTTAGTGAGTCTGATGAATTGTTGGCACCAGTCCTACATTTTG

>TCONS\_00009594

AAAAATAGATCCTAAATATTTGAAATCAATCATTTATCACTTGGTGGAGGAATATATAGTATTTTCATTGCTAC  
AAGTATGGATTATTGAAAATAATAAGACATGGATTGGATATTTTCCTTTAACTATTCATGTCAACTAAACCG  
GAGGGGGGGGGGGTTGAAGGGAATTTTGTGAAGAGAAAATGGATTATGGGGGCGAATATATAGTATTTTCATT  
GCTACAAGTATGGATTATTGAAAATAATAAGACATGGATTGGATATTTCCCTTTAACTATTCATGTCAACTA  
AACGGGGGGATTGAAGGGAATTTTGTGAAGAGAAAATGGATTATGGGAGTGTGTGACTTGAACCTATTGATTG  
GTCTGTGTAGATATATGCCTGCCACATGGGAATTCACAACCAAATGTGTCTTTGTTCCAATCGCCGTGTAAGC  
CCTATACAGAGGATAGGCTGGTTCGCTTAAAGAGAATCTTTTCTATGATCAGGTCCGAATCATGTTGTACATG  
AGCAGGCTCCGTAAGATCCAGTATAAGTGAAGTGAATAAAACGGAATCAAGATTCCGTTTTATCTAGTTCATT  
TATAAGATTAAATAGTATGTAAATGTATTCATTTCTCTGCATTGACACGATCAATACTACTATCGGAGTGAA  
ACAAGGGATCTAAAGAAGAAGAGAGGCTAGACTATATTAGTAACAAGCAAACCTTTTATGTGTATCTCCAAA  
TATTTTGGAGATAAATACCAATTAGAAGGTCTGAGACGACCCAGAAAGCACTTGATCATATCATGATCTGATT  
TGTAAGCCTACTTGGGTCTTGAGTATTTACTTGTAAGAACGGAATCTTTGTTTTGTAATGGATAATTGCAACT  
CCGTAAAAAAGAATTCAGTCAAATTTTTCTTACATTGAA

>TCONS\_00009595

AAAAATAGATCCTAAATATTTGAAATCAATCATTTATCACTTGGTGGAGGAATATATAGTATTTTCATTGCTAC  
AAGTATGGATTATTGAAAATAATAAGACATGGATTGGATATTTTCCTTTAACTATTCATGTCAACTAAACCG  
GAGGGGGGGGGGGTTGAAGGGAATTTTGTGAAGAGAAAATGGATTATGGGGGAATATATAGTATTTTCATTGC  
TACAAGTATGGATTATTGAAAATAATAAGACATGGATTGGATATTTCCCTTTAACTATTCATGTCAACTAAA  
CGGGGGGATTGAAGGGAATTTTGTGAAGAGAAAATGGATTATGGGAGTGTGTGACTTGAACCTATTGATTGGT  
CTGTGTAGATATATGCCTGCCACATGGGAATTCACAACCAAATGTGTCTTTGTTCCAATCGCCGTGTAAGCCC

TATACAGAGGATAGGCTGGTTCGCTTAAAGAGAATCTTTTCTATGATCAGGTCCGAATCATGTTGTACATGAG  
CAGGCTCCGTAAGATCCAGTATAAGTGAAGTAAACCGGAATCAAGATTCCGTTTTATCTAGTTCACCTA  
TAAGATTAAATAGTATGTAAATGTATTCATTTCTCTGCATTGACACGATCAATACTACTATCGGAGTGAAAC  
AAGGGATCTAAAGAAGAAGAGAGGCTAGACTATATTAGTAACAAGCAAACCTTTTATGTGTATCTCCAAATA  
TTTTGGAGATAAATACCAATTAGAAGGTCTGAGACGACCCAGAAAGCACTTGATCATATCATGATCTGATTG  
TAAGCCTACTTGGGTCTTGAGTATTTACTTGTAAGAACCGGAATTCTTTGTTTTGTAATGGATAATTGCAACTCC  
GTAAAAAAGAATTCAGTCAAATTTTTCTTACATTGAA

>TCONS\_00009742

CTCTTTTCTACCCCTCCTAATGTGCCATTTGATTCTGATTACATATGAGTGATTATTCAGTTTGCAGCTCTATAG  
TTTAGTGCTTAATAGCTATGAGATGCCTTATAAGAACTATCAATTGTTTTCTAAACTTTATTGTGTTTGTACTTT  
CTATTTTCTTTTTAATAATTTACAAGGTTTTGATTTCTGGTTGTTTTTGTAAATAAGATGTTATATAGAAGTAA  
ATCTCCCTCTGTTTCCACAACTGGAAGATCAGACTTCACC

>TCONS\_00009763

ATGAAAACAAAAAATCAATCTTCATATGATACATGAACAGAAGTGGAATTAACAAACACCTAAGGACGGT  
ATGTACCATTTTCACTTAGTTATCTACCGTAGGACTTAACCAATTGCGAGAAAGCCCTACTCATCATCAGAGA  
GATCATCCGAATTTGATGAGATCATCCAGATATGAGAAGCAGAAGCACTGGCATTAAATATGACTGAAATCAT  
TGACTTGCGGAGAGAGCTCGCCAACAGGGATGGTACTGTTTTCTTCAGGAATATCATGAATGGTAGACTCTTG  
GAGATGAAGTGCATACTCCAGACTCCACAGCACATCACCCATGGATGGCCTATCTTGACCAAACCTCAGCTAA  
GCATTTCTCTGCTGTTTCTCCAAACTTCCTGAGGGAATCTGGTCTTATTTTGCCCAAGTTTGGGATCTATGAT  
TTGTTCCAGTTGTCCTTTCTTCTGCCACTTCATTGCCCATTCAGCTAAGTTGACCATCTCCCTCGGAAGAGATGG  
AGCTATGACAGTCCTAGCACAAAGAAGTCTAATAAAACAACACCGAAAGAATAAACATCAGATTTTTCTGT  
CAGCTGTTGCCTTCTAAAATATTCAGGATCAAGGTAGCCAAAAGTTCCTTTCACGACTGTGCTAGTATGGGTT  
TGATTAAGCTCAAGCCCTCTGGCTGCCCCGATGCATATCTCCAGCCTCTGCTCCAGCCATACTGGGTAGAT  
CTGACCCATACAAATGACTCTTGAGGGTCCCATTCCTCATGTACTCAAAAAGTCTAGTCTCTCGTTGTTTTCA  
TCACAATATCCAATCAATGAAACCAGATGTGGATGGCGGAACCGAGAGAGCATCTCAATTTCTGTTCCGAAC  
TCTGCAAGACCTTGTTGGGACTTAGAATTAAGCCTTTTCAGGGCCACCTTTGTGCCATCACACAAAACACCCC  
TGTAACATTTCCAAAGCCACCTTTTCCAATGACCAAACCTCTCATCAAAGTCGTTAGTTGCTTCCTGCAAAGC  
TGCAAAGGAACCTTGATAATTTTCAATAGGAATGCGATGACTCGAGGTTGAAGCAGCACTTATGGACGTTGT  
CCCCTTTGAATGCTTGCTTCCCATGGTATGTGTGGACTGTAGAGTGCCACCATTAAATAGATAAAGGAATCCAT  
GTCTTTGACTGGGCAAGCTACTCCTGTTTTCTTCTT

>TCONS\_00009807

CAGGACTATTTTACGGCATCTCTCCTTCTCTCGCGCATAGCTCTACAGAGGTAGAACGGAATTAGGAAGAAA  
AGATGCTCTCAGTGTTTACGCGTGGGAAGTCAAGCTTCAACCAAGAGTAATAGGCATTTCGAGAAAGCCAAAGTAA  
TGGCGGTTTTGAAGCAAATTTGCAAGAAAGAGTCCCAACCATGACTTTTTTCAGTTTTGAGCTTCAAGTGTGCT  
CAAAATCAGATTG

>TCONS\_00009810

ACAAGAATTGAAGAATGAAGGATATGTCCAACGACACTATTCAACTTGTGGTTATTTGAAAACTTCCATGTC  
CACAATCATGACCAAGAACAAGAGAGCCCAAAACATAGTACTCTGAGCAAACCAATACAAAGGCCAAAC  
AGCCCAATTGTTGAAATAAGCAGCCGCAGCTGCCAATCCAAATACAATAGCAACATCCCTCACAACATAACT  
CATAGATTTCCATGGATTCTTGATCCAACAATGCGTAGGAATAGC

>TCONS\_00009870

GTGTGCATTTCGATTTATCGATTTCGATTTTGACCCTTATCGATAATTACTTATCGATTATCGATTTGTACATATGC  
TTATCGTTATCGTTTCAATAAGGTTTTGATTTTTCGATTTTTCGATTTTGGGGGCTTATCGATTACACC  
AATAAGAAAAATTTGCGGGATTCCACGGAAAGTATATCGCTATAAACGCGCCTAACTAATATGGACAAAAAG  
AAGCTAAAATAAGACGAACACCATTTATAACATAAAAAATTGTGTCAACAAGCACATGTAACAAAACCTAAAG  
TAAGGGATCAAATGTATGCCACCAACACTCCAATGGTATAAAAAAAC

>TCONS\_00009918

AAATTACAGCGCAGTTATTCTAGAAAATTATCTGATAGACTATTTTTCTGCTCGCTTGGTCTAAACAAGATAA  
ACACTGGATGTATTAGCTTGTATCCTTCACTCTTACTAGAGGTTGCACTGACAACCTTAACAGTAGCATGCCA  
TTCGTATCATGATAAATACTTTGCGAACAGTCCACCAAACAGCAGCTGGTATAGTGTCCATAGGTTCTTCTTT  
CTCCTAGCCAGCTCTTTTCTGCTCCAACACTTGAACAGCTCATCAGTTTGCTTTGGCATAAACCCGTTGTCTTCC  
AGTCACATTGAAGGAAAAATTCCACAACCTGAGTGGGACAGTGCAAAAATAAGTGAAGTGTCTGGTTTCAGCATG  
CTTTCACATGAAAAACACATGCTGC

>TCONS\_00010041

TATACTCTCCGTTACTAGAAGCCATGCATGTTAGCGCTTTACCTTGGGTTTGAATGGATACAGACAAACAATA  
TTCTTGCACCTATAATCACACATGGTATATACTCTGCTGTTATTCTGGGACATGGACTTTGGAAAATCCACAGA  
AGACTACATCAGAGAATCCAAACACTTAAACAAGAAGGTAATAATTCAAGAACTTGTAAGTGCCTACAA  
TAGTGAGAATCGAATAATTAGCTCGCTTGCAGGAACCTTTTGAAGTGAATTTGGAGAGATCGTAGTATTGTA  
TAAATCTACGTGGCATATACGAATAATATAGGTGTATGGCTCAAGTCAGTTGCATACACTAGGCTAGCAAAT  
ATA

>TCONS\_00010187

GCAAAAACAAAAGGGAAAACATATTTTAGCTGACAAAAATCCTTAATTTTCATAAGCTGCAAACATAATCCCA  
TAATTCAAATTCATTACATCTTGTACAAACAAGACATTAGGAGAGTATAGGGCAAGAAATGTGGGGGAAA  
AACTAGTGCTAAAGTAATAAGCAAAGTAACACTCATCTAATCACCACCAGCCTTCTGGTAAACATAGGTAAG  
CCCACATTTACCACAATAGTGCCTGTCAAAGTGTTAGCCATGAAAGTCCCGGCACCACACTCAGCATTGGG  
ACACTCCTTGCGGAGCCTCTGAACCTTACCAGAATCATCAACCTTGTAAACTGGAGGACAGCGAGCTTAAC  
CTTCTTCTTCTTGTGCTTAATCTTCTTTGGCTTAGTGTAAGTCTTCTTCTTACGCTTCTTTGCACCACCACGGAGG  
CGAAGGACAAGGTGGAGGGTGGACTCCTTCTGGATGTTGTAGTCAGCTAGTGTTTCGGCCATCCTCAAGCTGCT  
TTCCTGCGAAAATCAACCGCTGTTGGTCCGGTGGAATGCCTTCCTTATCCTGAATCTTAGCCTTAACATTGTCA  
ATGGTGTCCGATGACTCTACCTCTAAGGTAATAGTCTTCCCCGTCAGGGTCTTACGAATATCTGCATCTTTCC  
CAACTATGTGCACCAAGATTATCAAGGTGAGGAGTGCCGCTGCACAAAGAGAAGATA

>TCONS\_00010320

GAAGCCAAATGTATATAGTGTGAATGAATCACAACACTACTATACCAAAAAAATATGGCAGCCACTAAATAAT  
AAATAAGACAATAAAGCAACAATAAAAGGAACACCAGAATTTACGAGGTTGACCAACTTTGCCTACTCCT  
CGGACACAACCAATATTTTATTCCACTCCAAAAATACAAGTGAAATAATACTAAAGAGAAAAGATACAAAT  
GTCTTAAACAGATGAGAAGGCAAATGAGAGGTGTGTTTAAATCCTAAACATTAGGCCT

>TCONS\_00010451

CTTCGAGTCCAGACCTTTTAAACATAAAATAAAGAATAAGGGACTGACTTCTTTCTTGACAAGGATCCTGAATA  
AATCGCACATGCTCCAAGGACTTCACGGAATTAGGAGGCACACAGGTGGGTATACCAAGAGAAATGCGGGT  
AAGCGACGAGGGAAATTGCCTCAACAAAACAAGTTTTTATTTCCAGAAAGATCCCCACGCTGAGGGATGAA  
CCTCGCCAAATGATCTTATGGATCACCCATCCCATCTTTAG

>TCONS\_00010489



CGGCAGTAGTAAAGCGTGCTGCAAAATTTTTTGCAAGTCTTCTTGCGAAGGGGGTAGAAACAACAGCTTTCTA  
TGTGAGAAACGAGACCTTACTCTCTTCTAAGAGTTGATCGGCATCCAATCTGCAACTCACACCAATGACAA  
CAGCTTGCGACGTTACAGACTGCATTACATCTAGCAAGCTATAGAGTAATCGCTGTTTACCCTGTGTAAAAAG  
GTCAAACATCAACACAAAGATAATGGTTTTATGTGCCAACCCGCAC

>TCONS\_00010764

TGAATCACTTGTGGATCTACAAAACCTCTCCAGCAGAATTCACCATCTTTTTTCTGGAAATCTGTCTCTCCTAA  
GAAGTGAAGGGATGGGCAGTTGATAGGAGATGAAAATACATTGGCAGCTAATTGTGGTACCCCAAATGAAG  
GTCCTCCAAATTTAGCTCCTGATATTATGATTACAACTTTATTTCTTGAACTTTTGTTAGAGCCACTCTTTCCC  
TTTGCATGCCTGGAATTGCTGCACCTAAAACCTGCTCCCTATTTT

>TCONS\_00010774

GCAAACCCAGTAGCTACTTGTACTAAAAACAAGTAAGCGTAATTCCCCCTAAACAATAAAATATATTGACG  
TGGGGAGGAACGTATTTACTAGTTATATCATCCGCAATTGCTTGAATCTCGAGACGTTCTTCGAACCAATCAT  
ATACTTTATTGAGATAGGCGTAACTCCCCCAGTAGCTACTTGTACTAAAAACAAGTAAGCGTAATTCCC

>TCONS\_00010775

GCATTAACATAAATACGGCAGTAAGAAGCGGCAATACAAAAGTGTGTAAACTATAAAAACGGGTCAAAGTA  
GATTGTCCACACTAGCGCTTCCGCGCAATAATTTCGACCAAGGGTGATCCTATTACAGGAATAGCGTCAGGG  
ACACCTGTTACTATTTTCACTGCCCAATAACCAACTTGGTCCCAAGGTAAGGAATAACCAGTTACGCCAAAA  
GATGCGGTTAATACAGCCAGAACCACACCTGTAACCCAAGTCAATTCGCGAGGTTTTTTAAATCCGCCCGGTG  
AGATACACACGAAATACATGCAGGATCATCATTAGGACCATCATAACAGCTACGCCAAAAGATGCGGTTAAT  
ACAGCTAGAACCACACCTGTAACCCAAGTCAATTCGCGAGGTTTTTTAAATTCGCCCGGTGAGATACACAGGA  
AATACATATAGGATCATCATTAGGACCATCATACTTGCCG

>TCONS\_00010776

TATCCATTACAAAACAAAGAATTCCGTTCTTACAAGTAAATACTCAAGACCCAAGTAGGCTTACAAATCAGA  
TCATGATATGATCAAGTGCTTTCTGGGTGCTCTCAGACCTTCTAATTGGTATTTATCTCCAAAATATTTGGAGA  
TACACATAAAAGGTTTGCTTGTTACTAATATAGTCTAGCCTCTCTTCTTTAGATCCCTTGTTTCACTCCGAT  
AGTAGTATTGATCGTGTCAATGCAGAGGAAATGAATACATTTACATACTATTTAATCTTATAAGTGAAGTAGA  
TAAAACGGAATCTTGATTCCGTTTTATCTAGTTCACTTATACTGGATCTTACGGAGCCTGCTCATGTACAACAT  
GATTTCGGACCTGATCATAGAAAAGATTCTCTTTAAGCGAACCAGCCTATCCTCTGTATAGGGCTTACACGGCG  
ATTGGAACAAAGACACATTTGGTTGTGAATTCCCATGTGGCAGGCATATATCTACACAGACCAATCAATAGTT  
CAAGTCACACACTCCCATAATCCATTTTCTCTTCACAAAATTCCTTCAATCCCCCGTTTAGTTGACATGAAT  
AGTTAAAGGGAAATATCCAAATCCATGTCTTATTATTTTCAATAATCCATACTTGTAGCAATGAAATACTATA  
TATCCTCCACCAAGTGATAAATGATTGATTACAAATATTTAGGATCTATTTTCTTTCTCTATAAAGGCCCA  
GAAATACCTTGTTTACGTATCATTGGAAAGTGCAATAACATAAATACGGCAGTAAGAAGCGGCAATACAAAA  
GTGTGTAAACTATAAAAACGGGTCAAAGTAGATTGTCCCACTAGCGCTTCCGCGCAATAATTTCGACCAAG  
GGTGATCCTATTACAGGAATAGCGTCAGGGACACCTGTTACTATTTTCACTGCCCAATAACCAACTTGGTCCC  
AAGGTAAGGAATAACCAGTTACGCCAAAAGATGCGGTTAATACAGCCAGAACCACACCTGTTACTATTTTCA  
CTACCAAAATAACCAACTTGGTCCCAAGGTAAGGAATAACCAGCTACGCCAAAAGATGCGGTTAATACAGCT  
AGAACCACACCTGTAACCCAAGTCAATTCGCGAGGTTTTTTAAATTCGCCCGGTGAGATACACAGGAAATACA  
TATAGGATCATCATTAGGACCATCATACTTGCCG

>TCONS\_00010777

ACAATTGAATCAATTTAAAAATTTAAAAAAGACCTAAAGTTAGGGATTTATCAATAGGTAATGTTGCACCAA  
TGCCCAACCAAAGGGCGACTGCGGTACCAATCAAAAAGACAATCTTCGCTACTGGACGGCGAAATGGATTTT

GGAATTTATTAACATTCTCTAAAAAAGGTACTGTTAATAATCCCGCAGGTACTGAAACCATTAAAAGAACCC  
CCAATAATTTATTGGGCACTGTACGAAGTATTTGAAATACAGGAAAGAAATACCATTACAGGTAATATTTCCA  
AAGGGGTTGCAAATGGATCTGCCGGTTCACCAATCATTGATGGTTCTAAAACGGCTAAGCCTACATTACATGC  
AATAGTACCTAGAATTACTACTGGAAAAATATATAAAAGATCATTGGGCCATGCGGGCTCTCCATAATAATT  
ATGACCCATACCTTTAGCCAATTTAGCTCTTAATACAGGATCATTCAAGTCAGGTTTTTTTGTATTGGGATAG  
GTGAATTCTTATAGATCCATCCCCGAGGGAACTGGACATGATAATTTTAAATCATCCAGCTCGAGCAAGAAT  
AAAAAGAACCAAATGAATCCATATATCCATA

>TCONS\_00010778

ACAATTGAATCAATTTAAAAATTTAAAAAAGACCTAAAGTTAGGGATTTATCAATAGGTAATGTTGCACCAA  
TGCCCAACCAAAGGGCGGCTGCGGTACCAATCAAAAAGACAGTCGTCGCTACTGGACGGCGAAATGGATTTT  
GGAATTTATTAACATTCTCTAAAAAAGGTACTGTTAATAATCCCACAGGTACTGAAACCATTAAAAGAACCC  
CCAATAATTTATTGGGCACTGTACGAAGTATTTGAAATACAGGAAAGAAATACCATTACAGGTAATATTTCCA  
AAGGGGTTGCAAATGGATCTGCCGGTTCACCAATCATTGATGGTTCTAAAACGGCTAAGCCTACATTACATGC  
AATAGTACCTAGAATTACTACTGGAAAAATATATAAAAGATCATTGGGCCATGCGGGCTCTCCATAATAATT  
ATGACCCATACCTTTAGCCAATTTAGCTCTTAATACAGGATCATTCAAGTCAGGTTTTTTTGTATTGGGATAG  
GTGAATTCTTATAGATCCATCCCCGAGGGAACTGGACATGATAATTTTAAATCATCCAGCTCGAGCAAGAAT  
AAAAAGAACCAAATGAATCCATATATCCATA

>TCONS\_00010781

GTTCTTACAAGTAAATACTCAAGACCCAAGTAGGCTTACAAATCAGATCATGATATGATCAAGTGCTTTCTGG  
GTCGTCTCAGACCTTCTAATTGGTATTTATCTCCAAAATATTTGGAGATACACATAAAAGGTTTGCTTGTTACT  
AATATAGTCTAGCCTCTCTTCTTTAGATCCCTTGTTTCACTCCGATAGTAGTATTGATCGTGTCAATGCAGA  
GGAAATGAATACATTTACATACTATTTAATCTTATAAGTGAAGTAGATAAAACGGAATCTTGATTCCGTTTTA  
TCTAGTTCACTTATACTGGATCTTACGGAGCCTGCTCATGTACAACATGATTCGGACCTGATCATAGAAAAGA  
TTCTCTTTAAGCGAACCAGCCTATCCTCTGTATAGGGCTTACACGGCGATTGGAACAAAGACACATTTGGTTG  
TGAATTCCCATGTGGCAGGCATATATCTACACAGACCAATCAATAGTTCAAGTCACACACTCCCATAATCCAT  
TTTCTCTTACAAAATTCCTTCAATCCCCCGTTTAGTTGACATGAATAGTTAAAGGGAAATATCCAAATCC  
ATGTCTTATTATTTTCAATAATCCATACTTGTAGCAATGAAATACTATATATTCCTCCACCAAGTGATAAATGA  
TTGATTACAAATATTTAGGATCTATTTTCTTTTCTCTATAAAGGCCCAGAAATACCTTGTTTACGTATCATTGG  
AAAGTGCATTAACATAAATACGGCAGTAAGAAGCGGCAATACAAAAGTGTGTAAACTATAAAAACGGGTCA  
AAGTAGATTGTCCACACTAGCGCTTCCGCGCAATAATTTCGACCAAGGGTGATCCTATTACAGGAATAGCGT  
CAGGGACACCTGTTACTATTTTCATCGGACACTACAGTGGAAGTGTGTTGAATCAAGAACAGACAGTAAACG  
CCTTATTATGGACGCTTTATTCTGTCTCCACTTATGAAAGGCCAAGCCGACACAATAGGCATTGCGATG

>TCONS\_00010888

TTGCGAAGGGGATGTTGATTGTGTTGACCGTTGCCCAAGGCCATCAAGTGCACCTTATCGGAGCGGAGAAAT  
TTTCGCCGCTCCAATTCATCCTCGTGCTTTTTAATATTTGCCTTCAACTTCTACCGCCATCAGGTAACATAGCG  
CCTCGGGAGCCAAGCAACTTCTTGCGCCTGGCTATTTTGTGCGTTAGTTCAGCATTGTTAGTACCGAAAGCTC  
GTCACTTTGCTCTTCTCCATCCACGGCAATCGTCGGTTGGTGTATCTCCGCCGCTGCCGCCGGCGGTGCTTTGG  
TGGTGACCACAATCTCTGCCGAGGCTCGTCATCGGCGTCGTTGATCAGCTTATTCCAG

>TCONS\_00010956

GCCTTTGATGGGAATCTATGGGAAGTTAAAGATTTCGGACTTCCCTGAACTCAAATACTTAAAATTGGACAGCC  
TCAATACAGCTTTTCAAGATTGGGCCACAAGATATCCTCGATTCTTACCTGATTTTGCTGTCAGCTGGTGCACCAC  
GATCACGGTCACCAGCATGCAATCGCGAAAGCAGGTCTAGCAAAGAAGCACAATCG

>TCONS\_00011084

ATAAAATTCTGTAATTTTCACCTAAGAAAGTCGCAGGCAGGCCGCGAAATTAATGACAAAAGGAAAGTCTTT  
CGCTGAAATTAATCAGACTCACAACCTGAAATGCAGTTGAATGGAGCTGGACACATTTCGTTTAAAGAGCATAT  
TTGCTACTTCTGCAAAATTAAGGTTGAAATTTACAAAATAAATAAATCATTACATGGACAAGTAACACATTCT  
ATCCGACCGAAAAATAATCACCAGAACAAGCAGAAATCTTAAATGCAGCCAAAAGCTGGTAAAACAAAC  
AGGAGAGGGAGAACTACAGCCAACTAAGATGATCTGCAGAATGCACAGGATCTGATAGCAAATACATCTCC  
TTTTAGTGTTTAGGCTACAGAGTTGAAGTTCTAGATTTTCTCATCTTTTCATCTTGTGAAGCAGTATGTGGTAAC  
GAGGAAGATGAAATCGCGGCATGGTAAGACGAAGATGCTAGCTGAGCAAATGCTGGAACAGCACCACCTGC  
TAGCCCTGCACATGCAGATGAGAAAATATCACAGGAGGGGCACCAACAAGGAAATGCAACCACATAGGTC  
CTTTATCCACCTTCTAACGATCGGCATCATGGTTGAACCCATAGAATGCACTTGTAGTCCCACCAACCGCA  
GAACCAATCTGAACCATTAAGTAGGTAGTTAAG

>TCONS\_00011208

GTGAAAACCTACTAATAATATTATCATTACCAACAAATATTCTAGTCACAATTCACAACCTGTGATCGACGACTT  
TTCATATGTTGAAAACGATGAATAATGGCATCGTTGTTTACAGTTGAGAATATTTTACGCTCTACATAGCAAA  
CTAAATAACTATTTAAAAATTCATCACCTATGGTATTACGAAGCTCATTTTTTATGTAGTTCATGGATGAGAAA  
GCACGTTCCACAGAAGCGGTAGCAACAGGAAGAATGAGAGTCAACTTGATAAGTAAATACACCAGTGGCCA  
AGTTTGATGCAGGTCTGACTTAACCAACACTTTAGAAAGGTCATAATTCCCTTCATGTTGAAGAACCTCTTGT  
CATGACAACGAGCATAAACTATAAACTATCAAGCTGGAACTAAGATCCCGGAGCTTGTGTCTATCAAACCT  
CATTCGGATAATATTCAGCCAACTTCATTATCCTGTTCTTATCAAATTAACCAATGAATTAAGTGGATTTAAA  
CTAGCCATACCGAGAAGTAAGTCGGTACTCACGGCATCAAACGACTTCTAAGCTCTTGAAGATGCAAATCA  
ATAACACCATTAATATCTCAACGTGCAAGTGATGAGAGTATGTAACATCAAGAGATCTACGCTTTGACTTCC  
CAGGAAAATAGAGAGCATCCATCTTCGGGATCATTATCTCATGTTTATCACAGAATGAAGAGACATTATCCAT  
TAATGATTGAAATTCATATTCCCTCATCCTTTGTAATCTTTGCTTTGTATGAGTGAGGAGTCTCATAGCATTGAC  
AATATCTTGATCCATCCTTTGTAATGAGGAGCTCAAATCATTTGTTCATCATTAGAATTTCCACATCAAGTGCA  
ACATAAAAACAAATTCAAATTCCTTAATCTTAGTCATAAGACTTTCAGCAACAAGTCTATCAGCATAATTTGG  
ACCCTCACGAGCAACAAATTCAAGAACATGAATAATTGATGAAAATAGGACAATGAGGTTATCTAACGTTCT  
ATAATGAGAACCCCAACGAGTATCACCTGGTCGTTGAAGCCACGTTCTTGATTTAGTCCTCGTCCAGTATGC  
ACTTCACCTGATATGAGCAACTCCTCTAATTTTTTCAGCTTGATGTTGTCAAAGCAAATCTCTGCGCTTAAAAGA  
TGATCCAACAATATTTAACACATTAGTAACATAACAGAAAAAGTCATCTACATCTGAATGCTTCTTTGCAAGA  
GCCACAAGTGTTAACTGCAATTGGTGAGCAAAACAATGAATGCAATACGCCGATGGAGTTTCATTTCAGAATC  
AAAGTTTTAAGACCACGTAGCTCTCCTTGATGTTACTA

>TCONS\_00011317

GTGACTACTTTTGATGAACCCGATGCAGATGAACCTGTATCTTGACTCTCATCTTTATAGTTCTCAGCTGACTC  
CTTAGATTGCTTCCCTAGGCGGTATTTCTGGAGATGTGACTTCAAATGATATAGGGTGAGTCCTTTACCCCCA  
TCGCCTTCATAATTGTTTTTGGCGTTGCCTTATCAGGGCCACCGAGTTGGGTGACGGCGTCAACGAAGCGTTC  
ATGGAGCTCCGCCGTCCACCGGAGACGAGGCTTATGATCCGCCGTCAAACCAAGCAAGCATCCCCAACAT  
ATTTTGATATTCACCAACTCCGCCACTGCCACCGCCTATGGCGTTTCTTCCATACCAAATGGCAAAGCCGAG  
TACATTTTCATTCCAAATACTACACTAACCAAAGAATCTCTAATTTAC

>TCONS\_00011396

TGAAGAAATAGCATAAATGAGTATAGTAGTTGTTTTCTACGGCTCCTTGCAACTCTTCTACACTCGAGAGTTC  
ACAGAATGAATCCAATGCACCATAAAATCGAAAAGGAGGTGAATACAAGACAAATATCGCGTATGATTTAC  
ATAATTGAAAAAGAAAAGAAAAGAAAAGAAAATGCACAACAGAACAAATACGGTATGCACAACTCAGGCA

AGGAGATAACAGTAAACAAACAGCTCTCCATGAATAGCATTCTCTGATACTTCTTTACAGTGGCACCATATA  
 GAAAATTGGATGGGTCCTTCCTTACAGATTTACATGATATCTTGTCCAGGCTTTAGATATAGCAATCTCCTTGA  
 AGGCGCTGGAGGAGCCAGTCCAGGGATATCCCTTATGTCTTTGTTGTGAGGATTCACAATCTTCACAACAATA  
 ATGGCAACAACACCACAGACAATGAGGAAGAGGAAAAGCATGATGCATTTATCCGTGGCAACCTGCCGTCC  
 AATTCCTTGACAAGCTGGGATGCCTTTTTAATGGAGAACTGAATTGTGTCAAGCTCATTGACAACACGACCC  
 ATTTGATCAGTTTGGCCTTTCAAGGTAGTAGCAGTTTGTGTTCCCACTTCAATTGTTTGGTGAACAACCTGTTTG  
 GACCGTTCAATCGCTTGATCAGTTTCATCCATTGTCTTATTTCCAGCACTGATAAGCTCCTGATTTGACATTGCT  
 GATGCCATTTGGACATTTTCTCTGCTGTTGGTTCACCTGCACCTCCCATGTCAAATAGTTCAACCCTCTTATTG  
 CCAAGACTGCTCATATACGTTTTTCTCAAGGCCACATATGAGTTTAGCTCTTTGATCATTGATTGCTTCTCATCA  
 TTGAGTTGTTTGTGCTGATCTCAGGAGGATTTCTACTCTCCTCATCTTTAATTTACAGATCAAACCTCTTTAATTAAC  
 CTCTTACATTCTCTCATCTTCCCTGTAAGCTCTTCCAACCTGTTTACTCTGTCTGTTGGGATCTTTGATCTTATCCA  
 GCTTTTGGAAACCATTTGCTAGCGCTCGGAAATTATCACGAATTTCTCCATGGATCTGCTCCATTTGTGGGTTT  
 ATTTGCAAGTCCAAATTCGCCATTTTTTGGGCCTCCAATTTCTCTTCTTTTTCTTCTTCGTTTATTGCCGGATTA  
 GA

>TCONS\_00011446

GAATGACGGAAAAATGTGACATAAGGTACACATCATGCTTGGAGGTTGCCACACCAAGTTCCTCAGCTGGA  
 AGTGTAATAATTGTTGATTTAACAGATCTTGAATTACGTCTGAAGTCATAGTACGAAGCCTCTTTGTTTGTGGCT  
 TTGCAGTCCTTCTCTGATGCCTCCCCAGATTGTGGAACATTTTCATAGTTCTTATATTGCTCTAATCTTGTTTGC  
 CTGTATTTCTCCCTGGTTATGCTAAGTCTTTCCAGGGAATCCCTTGAATTTCTCTACCTCTTCTTGCCTCAGCA  
 GCAGAGGTATCTTGCATTTTATTATTCATGTAGTCATACTCATCTGCATCTGAATCAGAAGCATCAATATCTCT  
 GCCATGGAATCATCATCCATATCATCATCTATAGCTTCCATTTTCATATTCATTTGCCATGTAATCAGCATCAT  
 CCTCTTGTTGATGGGACATATTTTACCCCTACTAAATTACCTACAAACTAC

>TCONS\_00011483

AAGAGAGCCAGCTTCAATAAGTTGGGATTGATGGATCAACTTTGACAGCATATTCGTTGATTCCTCCAGCAAT  
 GTTAAATACTTTCTGAATCCCTGTGTCTGCAACCACTTGGCGACTTGTAGTGATCTCATGCCATGGTGACACA  
 AGACATATGTGTCCCTTTGAGGATCAAACCTTAGTTGTTATTTCTGGTCCCCAGCTTCCAAATTGGCGAAGAGG  
 AAGAACCTGAAATCCTGGTAAAGAAGCCTGGGCCACTTCCTCGGGTTCTCGAACATCAATCAATTGAGCTTCT  
 TCCAAGAATGATGGATCTTGCAGCTTACATGAAACTCGTTGGGTTGGATGTGTTCAAGTACAGATTCCTCTCT  
 CTCAGATAGAACTTGCAATAAATGCCATCCAAACTTAGTTTTACACTTTACAACCTTATTCAGTGGTGCACCA  
 AATGCAGCTTCTTGAATTCTGGTACCATTTGCCCTTTTCTACCCCAACCAAGCATTCCCCCTTCTTCTTTTGAT  
 GGACAAAGGGAATACTGCACGGCCAGATCACTTAGATCCTCTCCTTCTACAGTTCTTTTCAGAAGCTCCAGTA  
 AAAGTTTCTGGTCATCTTCTTTGACAAGTAAATGCTGTACTAATATCTCCCGACCACCTCCAGAAGTCCCTCCA  
 GG

>TCONS\_00011548

AAGGAGGCCTAATGTTTAGGATTTAAACACACCTCTCATTTGCCTTCTCATCTGTTTAAGACATTTGTATCTTTT  
 CTCTTTAGTATTATTTCACTTGTATTTTGGAGTGGAATAAAATATTGGTTGTGTCCGAGGAGTAGGCAAAGTT  
 GGTCGAACCTCGTAAATTCTGGTGTTCTTTTATTGTTGCTTTATTGTCTTATTTATTATTTAGTGGCTGCCATAT  
 TTTTTTGGTATAGTAGTTGTGATTCATTCACACTATATACATTT

>TCONS\_00011615

ATCCCTGATGCTCAATGGGCTGCTGATGGCGCACCTGCTGTTCCCTGCAGTTGCTAGTGGCTGGTCTGTAGATG  
 GAGCGGTAGAGGGAGGTTGGGACGCTGCAGCTGCTCCTCCTGCTCAAGTTGCTCAAGTTTCTGGAGCAGAAG  
 GGATCCCTGCTCCAGCTCCTACTGGCTGGGGATGAGACCTGCTTCCTTTAGAAAGTTCTTTTTGATTAAGATTA

GATAATGTGAGTTTCTATGACAAGACGGTTTTGTTCAACAATGCAAGTTATAAAATTTTGGATTGGTGATGTAC  
TAAATTATTTTAAATCATTTGT

>TCONS\_00011807

GCAAACAACTCAACTGAACTTGATCATAACTTAGCATATTTCTTGAGATTGACAGCAGCATCTTTGGCATT  
TCAGGTACAGGCATGTTGGTCTTAAGGGTGACTCTTGATGATGCTATCAAAGTCTTGTTTTCTCATTGTTTGG  
ATCAATCTTCCAAAGACAACTTCCCAAACATGAATAGTTTTGCCAATGTTGACTGGTGTAGCCTCAGCAAAA  
ACAAGGTCACCAATTTGAGCACTCTTGAGATGGTGTATGCTGAGATGAATTCAGCTACTCGCGAAAAACCA  
GAAGCCATATGAGCTCCCATACTTGCCAAAGCCTCAGATATCATAGCTGAAACTCCACCGTGCAACACCTTG  
AAGGGCTGGCAACACTTTTCTGTCACAGG

>TCONS\_00011808

GCATCTTTGGCATTTCAGGTACAGGCATGTTGGTCTTAAGGGTGACTCTTGATGATGCTATCAAAGTCTTGTT  
TTCTCATTGTTTGGATCAATCTTCCAAAGACAACTTCCCAAACATGAATAGTTTTGCCAATGTTGACTGGTA  
CAGACATGTTGGCCTTAAGGGTGACTCTTGATGATGCTATCAAAGTCTTGTTTTCTCATTGTTTGGATCAATCT  
TCCAAATACAACTTCCCAAACATGAATAGTTTTGCCAATATTGACAGGTGCAGCCTCAGCAAAAACAAGGT  
CACCAATATGAGCACTCTTGAGATGGTGAATACTGAGATGAACTCCAGCCACTCGTCCAAAACCGGATGCCA  
TATGAGCTCCCATACTTGCCAGAGACTCAGCTATTAGTGCTGAAACTCCACCGTGCAACACCTTGAAGGGCTG  
GCAACACTTTTCTGTCACAGG

>TCONS\_00011868

ATCCCCATATTTGAAACGGTTTCCAACGGATCTAACACTCAAGCTATTATTCTCGAAGATCTTACAAACAGAC  
TTTCAACAACCTTCCCCATATTTGAAACAGTCTCCAACGTAGCTGGAAAAATTGCATCTGGTTTAGGATCCTC  
AAAAATTATAAGGCATCCAGCACCTGGTCCAGGGTCCAGCGAATTTCTTATCCAAAATCATTTGAGATAA  
CTTCTTCTCAACATGGTCACCAGGCAACTCTATCAACTCAGCAATATGAGCAATCTCAACTCTCGAGAAGGGC  
TCAATCAATCTACAAAGGTTCTGCTCAAGCAAAGTGTATAGAGGGAAGACAGGTGCCGGTGGACGATAGG  
ATCTTCATCTAGCTGAGCCTTAAAGTTCCGAAGAGCAGTCTCGAAGAGCTTCAAGGAGCGCTTGAATGTGC  
ATCCGCAACAGCTTTCATTGCATCGACTTCTGGCCCCTGATATTGCAATCCAACCTTTGGGGATGATATTATC  
CTGCAACATCATCAGACTGGTTGACCATGATTTTGCAAAGCAACATATACTTGAGGCTGTATATGGCCTGGGG  
ATCTTCAAGGGCATTGAATGCTTCAAATGCTTCATAGAAATAGCTGTAACCAGTTTTATAATCCTTCTCTCCG  
CATGAAGGATCCCGCTCTGCAAATCAATAGAACCTTGCTGAGCTGGAGGCACATAAATAGCATTGGCTGCTG  
TTCGAGCAGCTGTGAGCGCAGCCTTGGCTTTGGGAAGATTTCTCAGCGAGAAATGTAGCTTGCTCTCCAGCAA  
GTCAATCTCCACAAGAAGCAGCTTATCATCCAATCTTCTCACCTCCTTAATCAGTCCTGAAAGGAGGGTCAAT  
GCTTCAGAGTATTCCTTGTTTTCCATCAAAAGAGCTGCGAGTCTTGCTCAATTCGTTGACGAAGAAATGTCC  
GCTTCTCCTTACGGGTCCACTCCACTATATCCTTGCAAAGTGTAACCTGAAGGTCAGATGTACCTGGTATTTTA  
GCCACTGCATCAATGATTCCTCGAACAATTTTTGCAGTTTTTGCTTGGGGATCAAAGAAAAGAAGGGGGCGC  
AACTGGGTCAGAAGGTTTTTAAGTTCTCTGCCCTATTCTCCTGTCTAAGGAGGTCAGAGAGATTGGAGATTG  
CCTGCTCTTTGATCCTTAGGGCCTCAGAAGCAGAAGATGGGTTATCAAGGATGCGGTAAAGAATAGAGATGG  
CGTTAGATGGTGATGTAGCCTCAGAAGCCTGAGCTAGAGAATCAGTAGTGGCTGGGAGATATGAAGATGACA  
TGGTCACAGCTTGCGAGATTTTAACTCAAATTAATTTACGGGAGAAACAGATCGGAAGGAGCTCGCGGTAGA  
AAGGAGATGA

>TCONS\_00011869

ATCCCCATATTTGAAACGGTTTCCAACGGATCTAACACTCAAGCTATTATTCTCGAAGATCTTACAAACAGAC  
TTTCAACAACCTTCCCCATATTTGAAACAGTCTCCAACGTAGCTGGAAAAATTGCATCTGGTTTAGGATCCTC  
AAAAATTATAAGGCATCCAGCACCTGGTCCAGGGTCCAGCGAATTTCTTATCCAAAATCATTTGAGATAA

CTTCTTCTCAACATGGTCACCAGGCAACTCTATCAACTCAGCAATATGAGCAATCTCAACTCTCGAGAAGGGC  
TCAATCAATCTACAAAGGTTCTGCTCAAGCAAAGTGTATAGAGGGAAGACAGGTGCCGGTGGACGATAGG  
ATCTTCATCTAGCTGAGCCTTAAAGTTCCGAAGAGCAGTCTCGAAGAGCTTCAAGGAGCGCTTGAATGTGC  
ATCCGCAACAGCTTTCATTGCATCGACTTCTGGCCCCTGATATTGCAATCCAACCTTTGGGGATGATATTATTC  
CTGCAACATCATCAGACTGGTTGACCATGATTTTGC AAAGCAACATATACTTGAGGCTGTATATGGCCTGGGG  
ATCTTCAAGGGCATTGAATGCTTCAAATGCTTCATAGAAATAGCTGTAACCAGTTTTATAATCCTTCTCTCCG  
CATGAAGGATCCCGCTCTGCAAATCAATAGAACCTTGCTGAGCTGGAGGCACATAAATAGCATTGGCTGCTG  
TTCGAGCAGCTGTGAGCGCAGCCTTGGCTTTGGGAAGATTTCTCAGCGAGAAATGTAGCTTGCTCTCCAGCAA  
GTCAATCTCCACAAGAAGCAGCTTATCATCCAATCTTCTCACCTCCTTAATCAGTCCTGAAAGGAGGGTCAAT  
GCTTCAGAGTATTCCTTGTTTTCCATCAAAAGAGCTGCGAGTCTTGCTCAATTCGTTGACGAAGAAATGTCC  
GCTTCTCCTTACGGGTCCACTCCACTATATCCTTGCAAAGTGTAACCTGAAGGTCAGATGTACCTGGTATTTTA  
GCCACTGCATCAATGATTCCTCGAACAAATTTTTGCAGTTTTTGCTTGGGGATCAAAGAAAAGAAGGGGGCGC  
AACTGGGTCAGAAGGTTTTTAAGTTCTCTGCCCTATTCTCCTGTCTAAGGAGGTCAGAGAGATTGGAGATTG  
CCTGCTCTTTGATCCTTAGGGCCTCAGAAGCAGAAGATGGGTTATCAAGGATGCGGTAAAGAATAGAGATGG  
CGTTAGATGGTGATGTAGCCTCAGAAGCCTGAGCTAGAGAATCAGTAGTGGCTGGGAGATATGAAGATGACA  
TGGTCACAGCTTGCAGATTTTAACTCTGACAGCTAAGGGCATGCAATCCTCAACACAAGCCCCTGGGTTGCCA  
ATTTAAGCCAACTCACATTTAAATTAATTTACGGGAGAAACAGATCGGAAGGAGCTCGCGGTAGAAAGGA  
GATGA

>TCONS\_00011870

CCCCATATTTGAAACGGTTTCCAACGGATCTAACACTCAAGCTATTATTCTCGAAGATCTTACAAACAGACTT  
TCAACAACCTTCCCCATATTTGAAACAGTCTCCAACGTAGCTGGAAAAATTGCATCTGGTTTAGGATCCTCAA  
AAATTATAAGGCATCCAGCACCTTGGTCCAGGGTCCCAGCGAATTTCTTATCCAAAATCATTGAGATAACTT  
CTTCTCAACATGGTCACCAGGCAACTCTATCAACTCAGCAATATGAGCAATCTCAACTCTCGAGAAGGGCTC  
AATCAATCTACAAAGGTTCTGCTCAAGCAAAGTGTATAGAGGGAAGACAGGTGCCGGTGGACGATAGGAT  
CTTCATCTAGCTGAGCCTTAAAGTTCCGAAGAGCAGTCTCGAAGAGCTTCAAGGAGCGCTTGAATGTGCAT  
CCGCAACAGCTTTCATTGCATCGACTTCTGGCCCCTGATATTGCAATCCAACCTTTGGGGATGATATTATTCCT  
GCAACATCATCAGACTGGTTGACCATGATTTTGC AAAGCAACATATACTTGAGGCTGTATATGGCCTGGGGAT  
CTTCAAGGGCATTGAATGCTTCAAATGCTTCATAGAAATAGCTGTAACCAGTTTTATAATCCTTCTCTTCCGCA  
TGAAGGATCCCGCTCTGCAAATCAATAGAACCTTGCTGAGCTGGAGGCACATAAATAGCATTGGCTGCTGTT  
CGAGCAGCTGTGAGCGCAGCCTTGGCTTTGGGAAGATTTCTCAGCGAGAAATGTAGCTTGCTCTCCAGCAAGT  
CAATCTCCACAAGAAGCAGCTTATCATCCAATCTTCTCACCTCCTTAATCAGTCCTGAAAGGAGGGTCAATGC  
TTCAGAGTATTCCTTGTTTTCCATCAAAAGAGCTGCGAGTCTTGCTCAATTCGTTGACGAAGAAATGTCCGCT  
TCTCCTTACGGGTCCACTCCACTATATCCTTGCAAAGTGTAACCTGAAGGTCAGATGTACCTGGTATTTTAGCC  
ACTGCATCAATGATTCCTCGAACAAATTTTTGCAGTTTTTGCTTGGGGATCAAAGAAAAGAAGGGGGCGCAACT  
GGGTCAGAAGGTTTTTAAGTTCTCTGCCCTATTCTCCTGTCTAAGGAGGTCAGAGAGATTGGAGATTGCCTG  
CTCTTTGATCCTTAGGGCCTCAGAAGCAGAAGATGGGTTATCAAGGATGCGGTAAAGAATAGAGATGGCGTT  
AGATGGTGATGTAGCCTCAGAAGCCTGAGCTAGAGAATCAGTAGTGGCTGGGAGATATGAAGATGACATGG  
TCACAGCTTGCAGATTTTAACTCAGCTAAGGGCATGCAATCCTCAACACAAGCCCCTGGGTTGCCAATTTAAG  
CCAACTCACATTTAAATTAATTTACGGGAGAAACAGATCGGAAGGAGCTCGCGGTAGAAAGGAGATGA

>TCONS\_00011902

TGAATCATAACGAACTGCAGGGGTTTCGGCTTCGGAAGTCCTCCATATATGAACCCGAGGGGATCCCACGACA  
TTCAAACGGGTCTTCAATAGAAATATTCTTCCGAAGATGCAAAGTGGATGCCAATCACATGAAGAATAGACCG

AACTATCTCCTTAACAACAGAGATAGATATGGCTGTGTTAACCAGAATCACACAGAACTCCTGCATCTGC  
TGGAGTTGGATATTGTGAGAGTCCCATTTTGAATCGGAACCTAGTCCAAAAATGAAGAGTTTTTCTTCAAGCA  
AAACTTTTGAAGAGCTTAATTCAGTGGACCTGCATAGAAAAAATCAGCAATAAATATCAATCAGCAAAAG  
GAAGAAATCCCATT

>TCONS\_00011968

CTTGACATACCTGCATCCTCTGTAATGTCAGAAGTCCACAAGGTGAGATTGTCCCTTAAAAGCTGCATAATC  
AAGGTGCAATCTTTGTAGGAGTCCTCATTAAGGGCATCCAGTCCGATATTGCTTCATCAAAAGCCTGCTTAG  
CCAGGTGGCATGCCCTTTCAGGGGAGTTCATTATCTCATTGTAGAAAACAGAGAAATTTAAAGCCAAACCCA  
GCCGAATGGGATGGGTAGTTCATAATTCAGCCTCCGCAATAGTTGTAGCTGTCTGATATGCTTTTAAAGACAG  
ATCAGAA

>TCONS\_00012106

CACTCAAACTCTGCGCTCACTGGGGGTGTGTACAGACTCCGGAGGGGCTCCCAAAGCCCAAGCGCTAAGCA  
CGGACAACTCACGTGCTACCATATCAATACCTGGATCCGCACGGTCAACTCACGTGCTACGCGGACAACTCA  
CGCGCTATGGTATCAATACCTGGATCCGCACGGTCTACTCACGTGCTACGCGGACAACTCACGCGCTATGGTA  
TCAATACCTGAACCCGCACGGTCAACTCACGTGCTACGCGGATAACTCACGCGCTATGGTATTAATATCCTCA  
CAACCAGGCCCT

>TCONS\_00012107

CACTCAAACTCTGCGCTCACTGGGGGTGTGTACAGACTCCGGAGGGGCTCCCAAAGCCCAAGCGCTAAGCA  
CGGACAACTCACGTGCTACCATATCAATACCTGGATCCGCACGGTCAACTCACGTGCTACGCGGACAACTCA  
CGCGCTATGGTATCAATACCTGAACCCGCACGGTCAACTCACGTGCTACGCGGATAACTCACGCGCTATGGT  
ATTAATATCCTCACAACCAGGCCCT

>TCONS\_00012174

GGATGGTCAATGGCCATTCTTTTGATGAGAGAAACCAAAGCAAACCTGGAAGTTTTGAGCTCCCTGACTTTCTT  
TCGTGCTTCCCATCCTTGAAGCAATTTGGTAAACTAGTGGAATAAACTTGTAAAGATTGAACCTCACTTATTGTG  
CCGAGCATGCTATCCACAACAATTGGTCTAAATGAGAGACCAAACCACAGCGAAATAAGTCGAAATACCAC  
CCTGACATCATATTTATCTCTATTACTAAACAGCGTTTATATTCATCAAGCGC

>TCONS\_00012175

CTTGTGCTTTCTTAACCGCATTGCTGCCTGCCATTCAGTGAATTAAGTCGTTCTTCATAACTACGAAACAGAG  
CATCCGCATAGTGCGCAAGATGGAAATGCAGTTGACTTCGTTTTATGGCGGAAACCTTTCCTTGTGCCATGCA  
ATCCTCAGCTAGAAGGACTGCATGCTTCAAGTATTTCTCTAGTATAGTTCTTGAGTTGCTTGATCGTGTTTCAG  
CGAGCCACTTCCCAATTAACCGGAAAACATCAGATGCGTTTTTCATTTCGCTGGTGGTTTTAGTGAAATATACTTT  
GCAAGATTGATTGCCATCTGATGTTGGCCTTGAGCACGCAGAAGCTTAGCTTCTTCAAGCCGTCCAAGCCAGT  
AAAGGTTGGAATGTTCTCCCATTTCTGCACAGAGAACTTGAATTCATGCAAAGCTGAAGCAGCCTGAGAAA  
AC

>TCONS\_00012176

TGGCAATTTAAAATATGAAGCAAACTCTTCTAAACGCCACAAATGGTTCCAGCAAATTCATATGTAAGTGT  
GCTTGCTTCAAAGTGCGCTTCCAGTCCATGTCTAGCCATGACAACTGAGTAATTGATGGGAGTACAGGTTTAG  
ATGAGACCTTTGGCATCTTCAAAGAATCCAGCATTGTGCAAGATGAAGTCCACCGTGAATCCCATGTCATCCC  
GAG

>TCONS\_00012177

TCCCAAGACAATGTGGATATTGATACTACAGATGAAGTGGTTGTCTGATGCTTTGCCTTCAGAGGCATGGAGC  
GTGACTTTGATCCATAGCTAGAAGGCCTTCCATATTGCTTTGAATTTTCTCGCTTAGAGGGATTAGAGGATGTG

CTTCTTTCCATCACGTGACACAACCGAAGCTCATTAAGAGCATCTAAGATAACTTGAATTGATTGGTCAACT  
TATTGTCCTCCGTAAAAATGTTCTTTCGACCTGTGAGGAGATCAGTTGACAAAGATCAACATCCACGTCTCT  
TCTACTCGACAAATTGACCATCACATGAGGGAACAAGAGTTCTGCAACTTCAGATTTACCAAGACAATATC  
TTGACACAATCTCAGGATCATATCATCACAATATTCAATCAGAG

>TCONS\_00012178

GGACAATGTCATGGTCAGAATCCAAATATGCATCTTCGAAAATATTTTCCTCATTCTTTTGTGCTGGGTATGCT  
TCATCTTCAAACAATTTTTTGTGTAATGCTTTTAGACTCCAGACAAGTAACCTTGGCGGAAGGTAGCGAGATC  
GTTTCCCTAAGATTGACAAGTGCTCCCTAGGCGAGTAATTTTGAAGTTAGTTCTCTCGTGGAACATCCGTATATCA  
TGAAATAAATCGAGGTTAGGGAATGGCTCTAGTTCTTTAATGTACTCGTGTAGAGATGGGTGAGAGTCCAAG  
GTAAGTTGGCTGAGCAGAGACAAAACCTTGAGATGATGTGTGCTGAGCTGACAGTTTGGGACTAGACTCGGAAGA  
AATGCAACACATTACCAACTTGGAATTAATAAACTGAAGCTGTTACCTAGGACAACAGTGGTTCCTCCAA  
TTGCTTTATTTTGAAAACTTTAGCAATGAAGAGATCATTCGACAACATTGGTCCAGCAAAGCATCAAGGTCC  
AAGCATTGACCAATCAAGTTGAGGAGATAACTGGCAGTACTAGGAACCGCAACTCGATGCCCTAATACATCA  
ATAAGCACTTCAATCCCAGCAAGCCTGTCAGATTTATGCCTGAAATGAC

>TCONS\_00012179

GGGCCATAAGTTCTTCCATATACTTTGACCTAGAAGTATACTTTAACTCCCTTGATAGATTATCAAGGACAAC  
AATAACAAGTTTCCTTAGACAAGGGTTAATAGCAGCAATAACACATACCATAAAAAACAGCCTCCAATTCAAT  
TTTTTCACTGTGCAGCGCAAGATGAGCTAGGGTTACAATTATCGTTTCCAATATGGTACGAGGCTGAGGACCA  
GCAGCTAAAACCTCCTTCGCCATCACCAGTTTCTCTCTGGAGCAAGTCACAAGCTTTGTGCCAAAATTTGAAC  
ATATGTCCTGGAATAGTTCAAAATGACCATCCCAAGTTTGGAAGAGCACACCAACTCGTTGAGCAAAGCATA  
ACCTAACTCGATAATCAGGATCCCGAAGCATCACCAGCAGCTTTTCAATCATAGACTGACCAATTTGAGGAT  
CCACTAAAATGAAATTGCAAATGCAATCAATAAGCTTGGTCCGGCCAACCAATCAAAGAGGTGCTGTCTG  
CAATTTTG

>TCONS\_00012180

GTGTATGATTACTTCCAGGACCCTTGGATCACTTTCTTTCTCCATGAGCTCAAACATGACATCCCATGTATGAA  
ATGGTAAAGCTGAAAAGAACTTTGTGATGATTGATACGACTTCCATTCTCTGATTTACAGACGAAGCCAATAT  
TTCGGCAGTAGGTTTTCCCCCAATTTTACAGCATCAGTATCTTTGGAACATAATGTTACATCCAACCTCCATGT  
CCATGATCATACTAGTACGGCTATTTACTGGATGAGAATCGTGACTAGAAACAGATGCAGAAGAGTCAAGGT  
CGTCCCTCTTTGAATGAAAATTACTTCCACTACTTGAGGATCCTTCATACAGTTTAGCAAGAACCTTCAGAATC  
CTCTCCACAGATTGAATTACTGCAGCTAGTACGTCTATGCTGTTGTCGTTTTGCATCTCATTAACAATGGGGA  
GCATAGAAAGCTTTCAAAGGACACACGAATGGTCCCAATTGTGTCAAATATTGACCTTGAACCCGACAAACC  
ACAAACGAGGTCGTCATAACTTTTCTCTAAGATAGAAGCAGCTCGATCCAACAACCTTCGACACATATTGACT  
CAGAGTGGCAAGGCAAGGCACAATTTCTTCTCCTAGCCTAAGAGTGAACAGCACATGAAGCCAACACAAAT  
AGAAAGATTAATGAAGGCATTCCATTGCAAGCAAGAGATGAACTTAAAAGCAGAGGGCAAAAAGACAAT  
GCCAATAATCAGTTCC

>TCONS\_00012181

CAGGAACATAGTGTGACTGGGAAAGTCCTTTATCTAGCAATGGTGTACCACCAGTACAGAGAACATAAACAG  
CTGTAGGCAATATAGCAACCAGCTGTTTATTCAACATTGAACAGTCCTTCCAGAAAGGAACAGCCAAAACAG  
CTCTCAAAAGATTTTGCCTCAAATATAAAGCGTCTCTAAGATCACCTTGATAGCCTTTCCTTGAAAAGTAACA  
CAAAATGAAGCACAAAACAGATATTGATGGCACGCGTTTAAGTAATCGAAGATCCCACAAGTCTTGGGGCA  
CAAGGTATGCATTAATTTTATCATTGAGTATTATGTTTCTAAGTAGCCTTAATGCAGCATCCACAACCTGCTGTA  
AAAGTACTGAATGTGGGCAAACCACCAATAACACAGTTCCATATCGTACGCCAACCTGTTTCAACCCCATTA



AATGTGGATGACAACTCTGAAGATGTTTGCAGTGCTGGAACAGGAAACCGCAGCATCAAAGAAAGTCCTTG  
AAGACTCCTCAATGTCCACAAGAGACCTTCATAACTATGCTCCATGTTTGCATCATTTATTATCCTTTCAAAGC  
TTGCACATATACCTTCAAACCAATAGATCAACAAATCCTTCTTTATGCGACCATAATAATTGTGGATGAGGTA  
ACAGAAAGCTGCATGCCACGGCCACTTTCCCCTTGAGAGCCTCTCCCTTATCTGGACTACAACATGCTCCCTT  
CTAAGTCGTTTCTCAGATGACGATGCTATAGGTGTGTTAAGACATGCCCCGGTAAAAGACAAGTGCTGCAAGC  
TCCATAAGACCACACTGAGAGCTTGTCAGCTTCCACATTTGTCATCCCTGGTTGTGTCTTTCCAGGGTAAATT  
GATGGTCCAACCTGCTCATTTGATCTAATTCCCTCCCTAATACATCCTGAAGTTGTTCTAATAAAGAGCTCCCAT  
CAGCAAAATCTCTCGTCAAATTTAGCTGTAGCCTAGCATAAAGAACAAGCGAATCCTTTAACCCACGATCAC  
GAGTTGTCATCCAACATCGGAAGACAAAATGATGCAGAGCATCATGGATTTCAGGGATTAGTA

>TCONS\_00012182

CTCGGATTGAAAACCTAGGAGTATCCTTTAAGACATCCCAGACATGATTGAAAAGCAATTTTGCCACAGGTAA  
AAGAAGCATATCTTTGCCTGAAAATTTGGCATCCTCTGCTCGTTGGACAACAATCCGAAGAGTTTTAGCAAAA  
TTCAACTTGGGCAAACGTTTTTTGCTCCCAGATATCTCCAGGGACACACATTTAGTAAGCAATGTAACAAGAA  
AGGGCCACGTCTCAGAATGAGGAATTTTCGTCTGGTTTAAGCCTCGCGGTCTTCTCTCCAACGTATCTGCAGAA  
CTCAACAGACCTTTGGCCTTCTTCTAGCCATGCATTTAACAACCTAATCCCTTCTTCACGAGATTTTGCTTTATC  
TGATGAGAGTTTGGAGACAATGTCTGAATATCTCTG

>TCONS\_00012210

CCCATGTGCACAATTCACCTTTGCAAGTGAAGAAGAAGCAGTGTTCCAAGTGCACCGGTGCTGAGTACACTGT  
TCCTCAGCGTCAGCGACCGTTAATTTCTGCAGTCTTCTCTGTCCAGTAGCTGTTTCCTCAAGTCTTTGGGGGCTT  
TCAGCGACAGAACGGTGTGCCTGTTGAAAACCAACCAATGGCTGATCTTTGAGTATCATCAACAGGTAAATCA  
GCAAAATCCTTTGCACCTTTTGGCATATTAGGAATGAACCAGGTCTCCAAATTGATCTACAACCTGTTTGACGA  
GGAGTATGGATGGAC

>TCONS\_00012302

TTGGAGACAGAATATCTTCAAAATCCAACAATAAGAAAAGGTGCCAGAGAAAATAAACGGAAATTCTCAG  
GAGACATAGGCATACCCATATTCATCAAAATATCCACCGCGGCCTTCAGTTCCAAAGTCCTCCCTAAAGACA  
ATCTGTATATTATCAATGTTGTCACGATTCCAGAGCGGCAAAAAGAAGCGATTTGCAAAACGCAGCACCAAC  
AAATTCTGAACCAACTCC

>TCONS\_00012380

GCTTGGCGAACAAGAGAGGCCAGTAAGGCTCTACGGTAACATTTGCTGCTTTTACAATACTTGAAATCTTCTC  
AGCAGTGATAGGGATGTCCTCATCGTTGAGGATCAAACATGCGTAGGTACAAGCGATTTCTCCGATCGACAT  
TTTCTACTCAATCGATTTACCTTGAGGCAAGAAAATGCTGGTCTGCTCTTTCCGCTGCTGCAACTGATTGCTAG

>TCONS\_00012383

CTCAGCCACGCATACAGACTGGACGAGTATCTGGTGCATCTGTAGAGACAGGACAACCATGTAACCCGAGTC  
AAGGACCTTTACAAACCGGACGAGTATCTAGTAACTCTCTCCAAGACCTTCTTTAGAAACACAATCATCAC  
GAAATGAACCAGAACTGTTTCATCGCTCTCCAGAGGATGACAATTGTGCAAGATAAATTTGAAGTTTACAGC  
GGGCTGCAAGAGCATAGGTTTCAAGCCATCGTAATTAGTACAATGCAAAGGCTTTTTAGAGCACGGATAGCT  
CGACTCAGCAGGCTGTAAGTACAATACTAATGAAGAAAGATTGTCTCATCGACCTACAGATGTTGAG  
CTTGAGGACTGGAAATACCTAATACAATATTTTGAAGTCAGGATTTTAAGGTACTAATTAATACATAAA

>TCONS\_00012396

TGCCTTCTAATCCCAGGTACTAATTTTGAATGGTACTCATGATCGAGAACTGGTGGCTTTGGTGCTTCTTGCT  
TTGTGACTGCCATTACTGATGCCTTAAATCGAACTTATGGAAATCCTCACAATTGTCTTAAAAATCCTCCAAA

CAAATATATCAACACCCTTCTGGTGCCAAAAAATGGCCAAATACATGTGGATATAGAATGCCTGGCTTCTCA  
GGGAATTTTCAATGTGGT

>TCONS\_00012446

CGTCAAACAGCAGGACAAATAAGAGTCTAAAGATAAAGAGGTAGTATCTGTACTCACCCGTTATCATCCATA  
ACCAAAACTTTTAGTCCTTGAAAAGTCATCTGCATGTGATTTGCAGGCAATCTGGGCATAAAGGGAAGCTTA  
GGCTCATTTGAGCGTCCAGGAATCCCAAGTTTAACAATAAAGATAGCAGTAGACCCCTTGCCAAGACCTTCA  
CTTTGATCCAAATATGACCTTCCATAAGATTAACAAACCTCTTAGAAATTGCAAGGCCAAGC

>TCONS\_00012560

GATAAACTGGAGCAGGCTTTTCATAAGCTCAGTAGATTCAGCTGAGACTAGAATCTCCCTCTTGAAGCTCTTC  
TCTGCATCATAATACCCTGAAACAATCAAGAGGATGCGAAGTTTCTCTAGTTGCTGGAACTTCTTATGTTTTT  
TGCTGAAGTAGAGTGATGTGATAAGAGCTCCCCTATAGGTATTCCGACTGAACTCATTCCAATATTTGAAGTC  
CCCATTCTTGATCCTGTACCATAAGGTTTCCCCGATTTTGACCATCTTCTAATATCTTTCCGTAAAACCTTCTCT  
GCTCTGGGGTCAGCTTCATCCAATTTTGACAAATTTATATTATCTTTCTGTAAAACCTTCTCCGGCTCTGGGCTCA  
GCTGCATCTGACTTTGACAACTTTTTAATATCTGTTTGCAAACTTTTGCTCTGGGGTCAGCTGCATCCGGTTTT  
GACAATCTTTTAATATCTTTTTGTAAAACCTTCTCTGCTTTGGGTCAGTTGCATCATGCAATTTGTATCTAAAAA  
TTTCATAAAGACCGTTACATCCAAATCGACCTGCT

>TCONS\_00012599

GCTGATATAGGACGAAGCTTTTCGTAGAATTGCAGCATCACAACATAAACATGTTTACTTTCCACAATTGAAC  
CCCTTGCAAACCTGAGAGGACAATGATGAGGATCAAAGCAATCAAGATACCTAACACTATCAGCTTGATCTTC  
ATGTTTTGCAGCCACATTTTCTCCGGATTTGGGTTCCAGTATTCCTGAAGTCTTGTGCCTGGTGATGAAGGTT  
CTCCGTCTTATCCACAAGAAGCTCTATCTTTTCTCCACGATCAAGAACCTTCTCAATGTTTTCCATCATAACAC  
CTTTAACTTCCGAAACCTGGGCTTTCACCTTCGCGATTTTGCTAATTCATCAGGATGGTCAGCACAATACTGC  
ATATGCTCCTTCAACTTAGGTCCGAATTCCTTGTTCAAGCTGTTTGAGAGGAGCTGTCCGAGCCTTCCCACCCCC  
ATATTTTCGACACAAAATCATCTTAACACGCTCCAAAAATGCTATTGGAACCTTGCTTCCAACAGACTCCTCA  
GCAACCACACAGTATGTGAAGCCATTATCGACAAGGTAATTGAAGGTGTGACCATCACAGTTGTAAGTGAAC  
TTGTTATTAGAAGCAGGGAGCTTCTGAAGGCACTGATAAGCTATGGAGTTGAAGTTACCACTGAAATCTGTGT  
ATTGAGCCAATATCACATTCCCACGACCCACAAACGCATAGATCAAAGCCTTCTGCTGACCCATTTGATTTCT  
TGCTGGATCG

>TCONS\_00012702

GGTAAAGAAAGGTTTAGACTCAAAAAATGTGACGTCCGAGGACATAAAGTACCTACGAAGATCAGGTGAGT  
AACAAACGATATCCCTTCTGAACACGAGAATAACCAAGGAAGACACACTTGAGAGCACGAGGAGCTAACTTA  
TCTTTCCCAGGGGCTAAGTTATGAATGAAACAAGTGCTCCAGAAACACGAGGGGGAACAGAGTATAAGGG  
TGACTGGGGAAACAATACTGCATACGGAATCTGATTCTGAACAGGAGATGAAGGCATCCGATTAACCAAAT  
AACAAAGCTGTGAGAACTGCATCGCCCCAAAAACGCAATGGAACATGAGATTCAATGAGAAGTGTGCGAGCA  
GTCTCAATGATGTGCCTATTCTTTCTCTCTGCAACCCCATTTTGCTGAGGGGTATAAGGACAAGAGGTCTGATG  
AATAATTCCTTGAGAAGTCATAAACTGCTGAAATTGAGAGGATAAATATTCTAAGGCATTATCACTGCGAAA  
AGTGCGAATGGAAACACCAAATTGATTTTAAATTCAGCACAAAAATTCTGGAATATAGAAAACAACCTTAGA  
ACGATCTTTCATTAAGAAAATCCAAGTACATCTTGAATGATCATCAATGAACTAACAAAAATAACGAAATCC  
CAAGGTTGAATTGACTTTACTAGGACCCCATATATCAGAATGAACTAAAGAAAAAACAGACTCTGCATGACT  
CTCAATACTACGAGGAAAGGAGGCTCGGATATGTTTCCCGAGCTGACATGACTCACATTCTAATGTAGATAA  
ACTAGACAACTAGGCACCATCTTCTGAAG

>TCONS\_00012703

TCTGATTCAAGTCCTGTTCCAATCGTCTGTCCCGTACTGCGGTCCTGCATAATAAAAGAATCATCAATAAAAT  
ATATACCACAATGGAGGGCATGAGTCAAACGACTAACAGATGCAAGATTAAAACGACAGTCAGGGACATAA  
AGAACGGAATCTAGAGTGACAGAGGGTAGGGGATTCGCTTGTCCAACACCTTTTGCTTTAGTTTGAGACCCAT  
TGGCTAAAGTAACAGTGGGAAGAGACTGTGAATACGCAATATTTGACAAAAGTGATTTATTACCAGAGATAT  
GATCAGAAGCGGCTGAGTCCACAACCCATTGTCCAAGAGTACTAGACTGGGAAACACAAGCAAAAGAATTA  
CCAACAACAGAAGTATCAGTCTGAGCAACAGAGGCTACTTGTGGAGATGTCTGCTTACTTGCTCGATATTTAA  
GGAATCATTATATCCCCTTCAGATAAAGAAAATCCCTGGTTACCTGTAGTCTCGGTCTGAGCAACATAAGCA  
TTTTTGGGTGGGCGACCATGTAAAGAATAGCACACGTCACGAGTGTGTCCAAGTTTATGACAATAAGAGCAC  
TTGGGTCTAGATCTTCCAAAACGACCTCCTCCTCGTCTATTCTCCATAGTTTGAGATGCCCGATTGTCCACAGA  
CTGGGATACGAGGACAGATGAGTCAAGTGTCTGTGATGAGCTCCCTGGGTGACTTGGTGTCTGCAGCAAGGCG  
AAGTAATCGAGAGAATAATTCATCAACTGTGGGGACAGTCGGACTAGCCAAAATCTGATCACGTACTGAATC  
AAGGTCATTAGGGAGTCCAGCGAGTGTAAAGAACTAGAAACATCTTCTATCGTTGCTCTTGTTGCTTTTCAATA  
CTAGCAGAAACTAGCATCAAC

>TCONS\_00012704

CTGATTCAAGTCCTGTTCCAATCGTCTGTCCCGTACTGCGGTCCTGCATAATAAAAGAATCATCAATAAAATA  
TATACCACAATGGAGGGCATGAGTCAAACGACTAACAGATGCAAGATTAAAACGACAGTCAGGGACATAAA  
GAACGGAATCTAGAGTGACAGAGGGTAGGGGATTCGCTTGTCCAACACCTTTTGCTTTAGTTTGAGACCCATT  
GGCTAAAGTAACAGTGGGAAGAGACTGTGAATACGCAATATTTGACAAAAGTGATTTATTACCAGAGATATG  
ATCAGAAGCGGCTGAGTCCACAACCCATTGTCCAAGAGTACTAGACTGGGAAACACAAGCAAAAGAATTAC  
CAACAACAGAAGTATCAGTCTGAGCAACAGAGGCTACTTGTGGAGATGTCTGCTTACTTGCTCGATATTTAAG  
GAACTCATTATACTCCCCTTCAGATAAAGAAAATCCCTGATTACCTGTAGTCTCGGTCTGAGCAACATAAGCA  
TTTTTGGGTGGGCGACCATGTAAAGAATAGCACACGTCACGAGTGTGTCCAAGTTTATGACAATAAGAGCAC  
TTGGGTCTAGATCTTCCAAAACGACCTCCTCCTCGTCTATTCTCCATAGTTTGAGATGCCCGATTGTCCACAGA  
CTGGGATACGAGGACAGATGAGTCAAGTGTCTGTGATGAGCTCCCTGGGTGACTTGGTGTCTGCAGCAAGGCG  
AAGTAATCGAGAGAATAATTCATCAACTGTGGGGACAGTCGGACTAGCCAAAATCTGATCACGTACTGAATC  
AAGGTCATTAGGGAGTCCAGCGAGTGTAAAGAACTAGAAACATCTTCTATCGTTGCTCTTGTTGCTTTTCAATA  
CTAGCAGAAACTAGCATCAAC

>TCONS\_00012731

CTTCAAACGGAAATACCAGAACACAGCCAGTTTATACATGACCAGTTAGTAAATGCACCCATAAGAAGCCTG  
ACGCAGGCGATTGTTGTTCTTCCAAGACATATTCCAGGAAGAGGGCCTCCTTAAGTAAATACTGTCTGATTA  
GTTCCATCAAAACTGAAATATGTACTAGTAGCTTAATTCATTCTGGCTTCTTAAGGTTTACGGCAGTTATCCGTT  
GCTTGGTTAAACAACTCCTGAACCTGCTTTAGCTCCTTTTCTGCAGCTTCCAGTTGCTTTTGAAGTTCTTGGCCA  
ACTGCATCGTTCTCAGCCTGGAGTTCTGCAATTCTTTTCAATTGGGCTTCTTCACCCCATCTGATAAAGGAAG  
AGCAGCAACCAATGCATCAAACCTGCTTGGCAGCCTTAACAAAAGCAGCACTCATTTGCTTTGGTTGCTCTGCA  
ACATTGGCTGCATCTTCTGTAGGATTAGCAGGAGGAGGTTCCGGATAATTAGGTGACAGACGAACAGGAGGG  
GCATCCCTCTGAAGAGTACCAAAGGTGTTGAAAGCAAGAGCTGCGATTGTATTTACTTGCTCCTGTAGCTGTG  
ATATTATATCCATCTTGCAGATTTTTCC

>TCONS\_00012765

GTAGAACAAGAGTTTTGGTGAGATGCGAACAATAAATAGGGTAAGAAGCGTAAGCGCAGATTCCTTGAGTA  
TGATCCTTATGGGCATGTGTTAAGAAATGGTACCTCTTTGTGCTTGACTTTGGACTCCATGTGTCCACTGAAAA  
TGGTAGTCCTTTTAGCATTTCTATTGGCATTTCCTCTCTCTACACAGTGGAATAATCCAAAAGGAGAGAGGT  
CGG

>TCONS\_00012789

GTTTTTATAGTTTACACAGTTTTGTATTGCCGCTTCTGACTGCCGTATTTATGTTAATGCACTTTCCAATGATAC  
GTAAACAAGGTATTTCTGGGCCTTTATAGAGAAAAGAAAAATAGATCCTAAATATTTGTAATCAATCATTAT  
CACTTGGTGGAGGAATATATAGTATTTTCATTGCTACAAGTATGGATTATTGAAAATAATAAGACATGGATTTG  
GATATTTCCCTTTAACTATTCATGTCAACTAAACGGGGGGATTGAAGGGAATTTTGTGAAGAGAAAATGGATT  
ATGGGAGAATATATAGTATTTTCATTGCTACAAGTATGGATTATTGAAAATAATAAGACATGGATTTGGATATT  
TCCCTTTAACTATTCATGTCAATTAACGGGAGGATTGAAGGGAATTTTGC GAAGAGAAAATGGATTATGGG  
AGTGTGCGAC

>TCONS\_00012790

CTGCCGTATTTATGTTAATGCACTTTCCAATGATACGTAAACAAGGTATTTCTGGGCCTTTATAGAGAAAAGA  
AAAATAGATCCTAAATATTTGTAATCAATCATTATCACTTGGTGGAGGAATATATAGTATTTTCATTGCTACA  
AGTATGGATTATTGAAAATAATAAGACATGGATTTGGATATTTCCCTTTAACTATTCATGTCAACTAAACGGG  
GGGATTGAAGGGAATTTTGTGAAGAGAAAATGGATTATGGGAGTGTGAATATATAGTATTTTCATTGCTACAA  
GTATGGATTATTGAAAATAATAAGACATGGATTTGGATATTTCCCTTTAACTATTCATGTCAATTAACGGGA  
GGATTGAAGGGAATTTTGC GAAGAGAAAATGGATTATGGGAGTGTGCGAC

>TCONS\_00012791

CTGCCGTATTTATGTTAATGCACTTTCCAATGATACGTAAACAAGGTATTTCTGGGCCTTTATAGAGAAAAGA  
AAAATAGATCCTAAATATTTGTAATCAATCATTATCACTTGGTGGAGGAATATATAGTATTTTCATTGCTACA  
AGTATGGATTATTGAAAATAATAAGACATGGATTTGGATATTTCCCTTTAACTATTCATGTCAACTAAACGGG  
GGGATTGAAGGGAATTTTGTGAAGAGAAAATGGATTATGGGAGTGTGAATATATAGTATTTTCATTGCTACAA  
TGAAAATAATAAGACATGGATTTGGATATTTCCCTTTAACTATTCATGTCAATTAACGGGAGGATTGAAGGG  
AATTTTGC GAAGAGAAAATGGATTATGGGAGTGTGCGAC

>TCONS\_00012841

TCCAACGAGGAAATTGCATTCACCCGCACTTGCTGCAAATGCAATCTTCCGGAATAGTAACCAACTGTAGT  
GCTCATTGAGGAATTTTGGCCAATGTATTCTTGCTTCTGTAACCTCCCATCTTGCGAGCGACTAGTTCATTTCTCG  
TTGTTACAATAACACTGCTCCCATTTCCTTTGGGCAGTCCAGCATAGATTTTTTGGCCACCAATCATTGTCCAAG  
CTCCAAACATCATCCATAACAATCAAAAACCTCTTTCCCAAAGGTAAGTACTGGTTTATTTTTTCGTAACAGTTCAC  
ACTGGTCATCACCAACGCATGCATCTCCTAAACTCCTCAATATGCTTCTCATGACTTGTTCTCAGTAAATGTT  
TGAGAAACAGACACCCAAATCCTCCTCTCAAAGTGATCCTCCACCCTTCTGTCATTGAAGACTTTCTGAGCAA  
GAGTGGTTTTTGCCAAGTCTCCCATACCCACAAATGCAATGGCAAGTAAACCATCTCTTGCTTCAAATAGCCA  
ATCCTTTATCTTCTCCGTGTCACCTTCCAGACCAACTACCTGAGTGTGGTCATAAAGGGAAGAAGTCCATCTT  
GACATTAGATTATTGTGTGCCTCCATACTTCCTTCTTTAGAAGTGGTACTCCAAGATATGTTGAAATGTTTTGC  
TTTATCTCCGAGATTCTGTCATTGATTTAGCAAGGCGCTTCCAGTTTGATGGCGAAGAGATAGCCTTTTGGG  
ATGGAAGCATGTAGTAGCCCGATCACTATCTGCAGATTGATTCTGGCAGTCTCAAGTATCTCTTCAGCTTCA  
AAGATTAAGTCTCGCAAACAGGACATGGCCCCTTTAAGGGTGTTGTTTTCTCTTGAGCCTCTCTGCATCTTT  
GAGAAAGCTTTGCATGAATAGTAGCTCGTTCTTCAGTTTTTCAAACGCTGTCTGAATTTAGTAAGAAACCTA  
CTCTCCTCTGTGAGAACATTCAGAAGTTTCTCCAAGAATACAGTGACCACCGCATCCACCATCTCTTCTGCTA  
CAAATTTCTGAAATGCAGCTTAATGAAAATGGATCACCTACACATGATACAAATATAACACAGCTA

>TCONS\_00012933

AATAAAAGCACCAACTTCTAGTGCTCTCTTGCCAATGACCCCAATGACATTCAATATCACCTGCCAATGGACA  
CAATTATCCATATTTACAAATCTATTACATATCTACAGTGATTTAAGCTGGATAGATGTACACCCTAGCTG  
TTGCAATCCAGATCCATCACACACGGACAGTTCGAGGATTCAATGCCTTCAATGCTGCTTCAGCAAAGCACTG

TGCCGCTTCTGCCTCTGCTTCAGCCTTCTCCGCATCTCTAGCTGCCCTTTCTGCCTCAGCAGTAGCAGCTTCTGC  
CTCTGCAACTGCTTGTGTAGCAGCTGCGGCAGCCTCTTCCGCGCTCATGCTCATCATTGAGCTAACTCTGCAT  
CAATTTGTGCTTTAGTAAGTATTCTAACTCCATTGTTTTCAAGCTTTGGGGAATCCTTCTGCTTCTCCTCCAGAA  
GCAATAGGAAATCGTTGCCCTGGCATCAGAT

>TCONS\_00012934

CCATAGCATGTAGATTTCTCCATTTATCCTTAATGTCCACATTTGAACGAGAACGCAACACACCAGAAAACTC  
TGGATCTTTGAGTATGGTGCTCCACTTGCCAACCCCATACTTAGCAACACCCAACTTAAGGGCAGCTTCTTCTT  
CTGATGTCCACTTCTGCTTTGGTGACCCATAATAGGTTGATGCCTTTTTGACACTGACGCAGAATTGAGCTTC  
CCTACCTATAGAGCCATCTCACTTTTCAATAAACAAATAACTGAATGTGGCAAAAGAAAAGTAAATACCCAA  
GAATAAATGATCAATAAGAACATAAGCAGGGCAAACCTATAATCTGAAATTATATGACAGAAGATATTCATT  
GTTAACT

>TCONS\_00013083

ACCAGTTTTGCTTCCATTTTCTACAACAGTAGAACCATGGCGGCCATCCCTTGGGCTCTCTAGACTAAAAAG  
GTGTCAAGCGAGGGTCTGTGTAATGCGGAAGACCAGCTCTAGCTCCCAAGGCTCTGCATTTAATAGCTGCCA  
CTTGAGCAGCAAATGGCAACATTTTCTCTGGTGGCATGTTGGCACAGATAGAATAAAGAACTGCACCAATGA  
ATGCATCTCCAGCACCAGTTGTATCAACTAGTTCTGTCTGAGGTATACTTTCAGCTGTCCCCACAAGTAACTTA  
CCGCTGATTGTCCCTATCCCTTTTGCCTGTAGCTTTGCCACATTGAGGATATGCATGCTGGCGATGTTGCATT  
AGTGTCTTTTTTCTGTTTCAGCTTTTTCGAACAAATCGTCGACATCCCTTTCTTCCGGGTCGAGATTGTCTATTCT  
GTCCTTTGTAGCATTAAAGCAACCATCTTCACCCAATGTCACAATAACAAATTTAACTTTTGGCAATCTTAAGA  
GCATGGAAAGAAGGGCGCTTGGAATAGAAGAAGCCTCAGTCCAGTTCTGAGGAAATTTGGTTGAGCAAACA  
ACATAGCTTGCGAAGCTCAAAAGGTGATCTAATCCTTCTCTTTTCTCTCAGCATCAATTAAAATGGGTATAC  
CCCTTCTATTTGCCTCCTCTGCTACAACAGCAGCAGTTTCATGCAATCTCCCGTCGAAATAGACAAGCTTAGC  
ACCATCCAATGATGACAACAAATTTGATTGGGAAAGATCAGTAGGTATCATGGGTGGATATCCAGGGGTGTG  
AATGCAAGTGCGAGTCTTCGTTTGGTTGTCAACAATGATGTAGGTAAATGGTGAATTGCCTCCATCAGACACC  
ACGATAAAAGACGAATCTACACCATCAGCTTCTAGCTCCTCCAGTATCCCTTTCTTGGAGAGTCATTAGAAA  
TCTTTGAAATAATTCTAGGAGTTAGGCCAAGGCGAGCTGCACAAGTCAAAGAATTCCCAGCATTACCACCTC  
CCTGAACCTGAAAGCTAGTGCTTCGAATCTTATCATCTGGATTTGGATAAGAAGCAACAGCAGCCAAGAAGT  
CCACTCCAACCGACCCACAACCTAATATGATGCGATTTTTCGGGGAGCACTATCGAAGCTTGAGTCGCCGGAA  
TTGACATTTTCACTCTAGTTCTAGCCGGCGAAGGGAATGGAGACGTCAAAAGGGTCCTAGAATTTA

>TCONS\_00013084

ACCAGTTTTGCTTCCATTTTCTACAACAGTAGAACCATGGCGGCCATCCCTTGGGCTCTCTAGACTAAAAAG  
GTGTCAAGCGAGGGTCTGTGTAATGCGGAAGACCAGCTCTAGCTCCCAAGGCTCTGCATTTAATAGCTGCCA  
CTTGAGCAGCAAATGGCAACATTTTCTCTGGTGGCATGTTGGCACAGATAGAATAAAGAACTGCACCAATGA  
ATGCATCTCCAGCACCAGTTGTATCAACTAGTTCTGTCTGAGGTATACTTTCAGCTGTCCCCACAAGTAACTTA  
CCGCTGATTGTCCCTATCCCTTTTGCCTGTAGCTTTGCCACATTGAGGATATGCATGCTGGCGATGTTGCATT  
AGTGTCTTTTTTCTGTTTCAGCTTTTTCGAACAAATCGTCGACATCCCTTTCTTCCGGGTCGAGATTGTCTATTCT  
GTCCTTTGTAGCATTAAAGCAACCATCTTCACCCAATGTCACAATAACAAATTTAACTTTTGGCAATCTTAAGA  
GCATGGAAAGAAGGGCGCTTGGAATAGAAGAAGCCTCAGTCCAGTTCTGAGGAAATTTGGTTGAGCAAACA  
ACATAGCTTGCGAAGCTCAAAAGGTGATCTAATCCTTCTCTTTTCTCTCAGCATCAATTAAAATGGGTATAC  
CCCTTCTATTTGCCTCCTCTGCTACAACAGCAGCAGTTTCATGCAATCTCCCGTCGAAATAGACAAGCTTAGC  
ACCATCCAATGATGACAACAAATTTGATTGGGAAAGATCAGTAGGTATCATGGGTGGATATCCAGGGGTGTG  
AATGCAAGTGCGAGTCTTCGTTTGGTTGTCAACAATGATGTAGGTAAATGGTGAATTGCCTCCATCAGACACC

ACGATAAAAGACGAATCTACACCATCAGCTTCTAGCTCCTCCAGTATCCCCTTTCCTTGAGAGTCATTAGAAA  
TCTTTGAAATAATTCTAGGAGTTAGGCCAAGGCGAGCTGCACAAGTCAAAGAATTCCCAGCATTACCACCTC  
CCTGAACCTGAAAGCTAGTGCTTCGAATCTTATCATCTGGATTTGGATAAGAAGCAACAGCAGCCAAGAAGT  
CCACTCCAACCGACCCACAACCTAATATGATGCGATTTTCGGGGAGCACTATCGAAGCTTGAGTCGCCGAA  
TTGACATTTTCACTCTGAAATTTCTAGTTCTAGCCGGCGAAGGGAATGGAGACGTCAAAAGGGTCCTAGAATT  
TA

>TCONS\_00013121

GGCGATCGGACAGAAAGCGATTCTATGGTCTACAACCTACTTACAGCGATCACGATCTCTTTTTAAGTTCCGTT  
AGGCTAAGAACTGTATGGAATCCGAGCAGAGTTAGCCGGAGATTGAGAATTCGAGTGCAAGCTAAAAACGG  
AGCCTCCGAAAATGCTGTCAGCGGGGGCAGCACCAATTTTAGTGATCCTAATTGGTAGTAAAAGTATCAGAG  
AGAATTTGAGGCTCGTTTTAATATTCCTCATATTACCGATGTATTTCTGACGCCGTTGAGTATCCTTCCACTTT  
TTGTCTTAAATGAGGACTCCAGTATCTGAGGAGTTTGCAGGAGGTTACCCTTCAGATGAAAAATGGCATGGT

>TCONS\_00013176

AGAAAAAATTATTTTCAAAGCTCACCTAAGAGCAGTAAGGTCATGATCATATAAACCAAGCTGATTAAAT  
TTTATTAACAAGAGGACAAATGGTACATATCAACATTCTGTACTTGGATCATCGGGCGTATTCACACCACAGA  
ATCTAGTTTGACAACAACAATTACCGACTCCAAAGAATCACACATCACTGAAGCCTAAATCTTCCAATCAGT  
TTGTGATTGTTATCACAAATGGTCCATCTGGTACAGTTCTTCAATCTAGAAATGCTTTGATACTAGCTCTAAAT  
ATTACCATATTTATATAGCACCACCTTTGTACTCATCGTTCCAATGGAAGCAAACAAAAACCTTACTCCCTTC  
AACTAGTGCACTTCACATACATAGGAATCTTAATCCTTCTGCTATTGCATTCCATAGATAATCCTAAGTCGTAG  
TCGTCACACCAACAACAACATTGCTCACCAACTTGCCACTTTTCATCTAAAGACATAGGGTTCTGAACGACCA  
CGGTTTGATTCTGTGAACGGGCTGTAGCTGTTGAAGAAGTGGGTCCTGCAGAGGATGTAGCACCGCCATTTGG  
GGTGTGCACGGGAACATGGCCTCTTCCATCTCCGGCATTAACTGTGTGATATAGTGGCATATGGCACATTTA  
ACTGATGGAGCTCCGCATGGATACATCAGCATAGTACGACAATTTCCACAGTTGACATGAGCAAACCTGGTTA  
GGACCTGGCACAAGGTTACCGTATGACAGCAGGCGCATCTCACACTAGTTGCCCCACGTGGATGCATCAGT  
AAGGTGCGACAGCCTCCACATATCAACTGAGCCATTTCCATTCCAGGAGGTGGGACAGGGGTGAGGGCGTTG  
CACACTGCACAGCAGACATTAGTAGCTCCTCTCGGATAAAGAAGAATTGTCCTACACCCACTGCACACCAAC  
TGACTCTGCATAGCAGTAAAAGAAATCAGAAAGCTAGGGCCAAACAGATTTGGTAATATATTCACACAAAT  
TTAAAGCAGAATTGGCGATAAGGGGATTCCCACTTTTCTGGAAAATGTGAATAAAAAAAGTTCTAAGAAAGC  
GAATTTATAGATTATTCAGAGTTTGGATTTGGTAATCTTATCGGAATTTTCGTTTTTTTATTCTTACTACATCTTCT  
TCTCCGTTTAATATTGAAAAAAGAATGTTTTCTTTTTTTGGACTTTTATGAGTTTCCAACGGAGGAGAGAGAGT  
AAATTCGGGTAGAATTGGAAAGTTCTTTTAATTTAATCCGAACGCGTAAATTTGATTTTTCTTTTCCTTTGTCCG  
A

>TCONS\_00013198

AAAGTAATATACGGCACGACCAAATGAAGCAAATCTCATCATTTTAAGTTAATCCACGTGTTAATCATTACTG  
AACGTGACAAGAAAGGCTACATTCCGCAACAATACAAGCAACGGAGATTACAAATGCAAGTCCAAGAGAAT  
TGAAAGAATTTCAATATGTTCAACTCCAGCGTCTATGAAGATAAAGAACACAACTATGTTATTCCGTTGTGA  
CTGGTTTTGTATGCAATATAACACAAGTTTGTCCAAAAGAGGCATTTAAACATGTCCTCAGAATAGCATGCTC  
CTAACTCAAAGCCTGAAGGAACCGGCACAGCAAACCTTGATTAAAGTAACTCTTTCTGTGGCGTCCATTATTT  
AGCTGAAGATGAAGCAGCAGAGAGTCTCGCACTCCTTGCCTTATCAGCTTTTTCCAGGTAATCTTGATGAGAT  
TGTGTCTTGGAGCCTCGGGTCATGAAGTACCAGGGAACGCCAAAGACGACGCTGATGACGGCGATACCAGCT  
ACGACGTGCTTCTTTTCGCCGCTATATAGGACATGCTCCAATTTTGCTCTGAACCCTCCTCCTCCATTTCTCCA  
CCATTCATCTTCTTCGTCTCACTTCCCGTATTCTTCTCCATTTGT

>TCONS\_00013251

GATAAATTGATAAGTCGGGCATTCCCGGGCCACCAAGCGAACTAGTGATTTCTTTGTACGGCCAGCTAAG  
GCTAAAGTTTCATTAAAGAGCGTTTCCACGTGGTAGAACCTCCTCAAGGAATATAAGGTTTTCATAAGGCTAA  
TCTTGAGCCGCCATCCAAGCGCGAATACCTTCGTTTAAGAGAATATTTTTGGTGAAGAAAGTCTCAAATTCAG  
GATCTTTCGCTGCGCGAATTCCTGAGAAACGAAGTCATAGGCACGTAGGTTCAAGGCTAGACCGACTACTC  
CAAGAGCAC

>TCONS\_00013266

AAAGAATGTGATGTAAGAGTTTCCTTTGACCTGAGATCGTCATAGTAATTGACAAGTTATTTATTGTGCTTTGA  
TACCAGACACCTATGGCCCTAGGGCGATAGTTGAAAGGATATTGGGTACGATTAAATGCTTGTAGAATTAGT  
GATTGATCAAGACGGAATCTGTCAACTCTTGGAATGAGTTTAAGCTCCATGTTGTCATGAATTATAGATGAC  
CAAATAAGACCTTGGCTAGGGCAATTGAATGAAAGAAGAAATGAGTTTCTTAGGTCATTCAATGGTCGATT  
ATATTTGACATGAATACATAGTTGGTTCGCCTATTAGGATTTGACAGTTGAACCATATCCTAGGGTGATCCAGA  
GCTATAAGGACAGAAGGAATTACTACATTATTCTTCTACGGGTTCTTGAGAGTAGATTGTATACTTCATGCTAT  
CCGGTCG

>TCONS\_00013322

AATTCATGTGAGATAATTAAGGAACTCAGCAGCAGTTGCAACAGCACCTCCTGTAATGGCATCCATCACAAAT  
CTTGTCGCGATTGTTGTTGCTTGCAGCAGATATGAGAGCCCCAGTCAATGCACCCCCAATCATTGCATTCTTCC  
AATCTCTGGTTCCACGGATCCTCTCTGCTCCATACTCCATTCCAGCATATACCCCAGCCACAGTCCCCCAATA  
AGCACCTTCTTTACACATTTTCTTCAACGAATTCTCAAAGTTGTGACTCGACACACTGCCTTTTTTGACAATGT  
GATAAGTTTCTTCAACAGCAGTTTTGGTGACAGCAACAGTGCCAATTTTCAAGAAAGCATCAACAGTTTGGTT  
GAGAAGTGGGTTGCCCATATCAATAACCAAATCCACCTTTGGAGAAGCTAATGATGCTGAAAATCTGCTCCT  
CGGCATTTTTTCTTCTTCT

>TCONS\_00013331

TGAGGAAGCTCGAGAGGGATTAGGCTCCAGGGTAAAACCCAAAGCATCAAGTTTGTGTCATCATGTGAAATTCC  
AGCCTGCAATAAGGTCTTGTTGTCATCTCTAACCTTCTTACCCTGAAAACTACACCAATGTGCAGCCCACCA  
CCAAGTATTGCAGTCACTGCTTCCATTACGGTCTCATGGGAATCACTAGATGTACG

>TCONS\_00013388

CTTCAAACTTTATATGGTCAGGCGTAGAAGAATTTACATCGGTGATCGTCCATTACCAAGCATCTGGCCGA  
TAAGGTTTGTACCTGCCAATATTTTGATACACAACGATCAATGCAGCTATTTTCGCCAATATTTAGCTCAGGG  
TCCTTGACCTTCTATCGACACATTTGTTGAAGCATGTCTGAGTGAGCTTGTTAAATGATTCAACCCTGTACTC  
CATCTCCTTCTCGGCCATGCCAAAAATCTGCTCCTTGTCAACTGTTGTTGGTAGATTATTAGCAGCCATCTTTA  
CGAACCGATGAATGGTGTCTTCTGTGCTCTTTCGTCTTT

>TCONS\_00013528

TTTTTCCTTTTTATCTCAAACCCTAATTTTGAGTAGAAGTGCTTTTTTAATTCACACATTTGAAGCCAAAATCAAC  
AATCAATCTTTAGAGTGGCATAGAGATTGTGTAGTATTTCAATTGCTAAAAGTACCATTGAGAAGAAACCA  
GTAGAGAAGAGACCCGGCATTCTCTTGGGGAGTTATGCAGACAGGAAAGATAGATGTAGCTATTTGAGGTTT  
ATTATCTGTTGCAGTCAACTCTTGGCAGGAATGGCATGGCGGCTTTACTATGTAACCTACCAAAATGA

>TCONS\_00013556

CAAACTATCTGTTGTATTAAAAACACTTTTACACAGCTAGACAAAGTCTCGACTTTCTTACAGTGAGACAGT  
AATGTTGACATCAGAACTGAGCCAAGCATCTTCTCTGCACATAAATCCAGTACATATCTCTGCTCACATTA  
CTAATTACCTAGTGAGATAGTATACCACCAAAAACAGAACCACAAATGAGGCCACTAGTGTGAACATCCTTC  
GGCTTGATTTTGTCTCGAATACCATCTTAAATTTATCCATTGTTCCAGCTAAAACACCTCTTGAAGAATCCATA

TCATTTCCCATTCTATCAAGCATCCGATTATGAGTCTCCACCTCCTCATGTATATCACCTGTCAATCTTTTGAGC  
ATATTAACCTCTATCTTGCAACCCATCTATTGCCCTCTCATTCTCTTGTTTCATCAATTTTCG

>TCONS\_00013629

AGAATCTCAAAACAGCAACATATCAGAAGAAGCATCGATAGGTTGAATAGGGCAAGGCAGCTGCCATGGCT  
CAAGCAAAGTGTGCGGAATTTAGAGAGGTCCACAGGGAATCCAGTAGCGTCAGCCCCAAAATTGAGTGAGC  
GAGTTCAATGAATTCAAACGTTTCAGTCAATTCAGCAATCTGAGCCCTCAACACATTGTTTTCTGCATCCATCG  
CAGGATAATTTCTCTCGACAGAATCAATCCTCTCGCGGCAGATACTGTTCTGTTTATGTAGCTGTGTTGTTTCG  
CTCATCAACTCCCCCAATCGCTGTTGCTTCCTCATCCGTGACCTACGAGCAGACTCACGGTTGGATTCCATTCT  
CTTCCTTTTCCTTTTCGTCAAATTTTGCATACTGCTGGTTGAGAAAGAGTGCAGAATACGAATACGACGCATCTG  
GATAGCGTATGTCATTAATAATTTTG

>TCONS\_00013706

CGTAAATGCGACCAACTACCTCCATGAACCACCAAGTCTGATAACCTCCTCAGTACTTGTATCCCTATTTGGA  
GCTCTCTCGCCGCTACGTTCTCCTTTTGATTGCCTAAGTCCCCATATAGATCTTTAAGCTTCGCAAGATTGCTA  
GATGCAGCCTTCTTTTCCTTGCTTTCATCTCTAGGTGGAGTTCGATGTTGATCAAGACTGGTCCCTAGATCATG  
CAAACCTTCGGCTGTGGCTTCGACTCCTACTCCGGCTCCTGCTCCTCTCATAGTCTCTTCTGCTTCTCTCTTGA  
ACTTCGATCATAATCATACCTCCTGTCTCTATCCCTTCCCCGGTCTCTGTCATAATCATACCTCCTGTCTCTATC  
CCTTTCACGATCTCCCTCATAATCATACCTCTTATCTCTATCCCGATCCCTACCCCTCTCCCTTTCTCTTTCCTGG  
TCCCGGTCCCTATATCGATCCCTATCCCTATCCCTATCCCTATCACGGTCTCTGTCCCTAGGTCTTTCCTTCTCC  
CTCTCTCTGTCTCGGCCCCCTGTCCCTTTCAGAATTTTCTCGGTCAGATATATCACGACTTTGACTCCGGCGGAT  
GCTGGGGGACCGTCTTGAATCATCTGCACCATCCTTATCATAGGGTGGTGGTGCATTGTACGTCGGATGGGA  
GATGAATCTCTAGTTGATGCACGATGAGGCGCACGCTGACCAAAAGACACTGAAAGGGAAGCTTTGACAGA  
AGGTGGCCGACGGGAGGTTTCCTCAGATCCGCGACTAGAGTCCCCGATCGAACCAGAGGGTTTGGTCGGCAG  
ATTCATTTTTTCGAGATTGGCAACTGCTGTCCGCATAACAGGAACAGGAATGCGGGGTAAAGTGTGTCAAA  
ATAATACTGTCCGAGAAATAAGTCACGCACATATACGCCATTGTCGTCATTGGCCACTGGATCCAGGAGA  
GAATTCCTCATCATCTTTGAGATAAGGCTCATACCAAGCCCATAATGTCTTAAAATCAGCAAGATATCTCAGA  
TAAAGGAACCCAACAGCTCTAATGTAAGGAGAATCTGGATGCTTTAACAGGCCATGCATTTGCTTGACAGTA  
AGTTTCATCGTAAAGAACTTGTAGAGAAGGCAGAAGGCTGTTGAAGGACCACGACAGTTGCCAGTCATCCAT  
GGTCCACATGGTCAACTTGATTATAAATTTTCATCAATCACTTCGTGATAAGTTTTTCAGGCGCAATAGGTCTCT  
GAAATAATCAGAAGAAAGAATGTTTCATGCACAGAACCTTCTCCAGCAATTGGTCGATCGGTCTCCCAGAAGT  
TTTAATCTCAGCCATGCCCTTGGTGATGTAGGCACCAAAGTGTTATCTTTTCTCCCTTTGCTTGGCCAACAAAT  
AAAAAATGATATTGGAAAGATTAAGGTTTCAGATACCAAGTTACTTGCTGGAGTTTCTCTGGAGAATTGAGCA  
GACAGAAGAAGTGGTGGAAGATTATCCCAGC

>TCONS\_00013707

AAATGCGACCAACTACCTCCATGAACCACCAAGTCTGATAACCTCCTCAGTACTTGTATCCCTATTTGGAGCT  
CTCTCGCCGCTACGTTCTCCTTTTGATTGCCTAAGTCCCCATATAGATCTTTAAGCTTCGCAAGATTGCTAGA  
TGCAGCCTTCTTTTCCTTGCTTTCATCTCTAGGTGGAGTTCGATGTTGATCAAGACTGGTCCCTAGATCATGCA  
AACTTCGGCTGTGGCTTCGACTCCTACTCCGGCTCCTGCTCCTCTCATAGTCTCTTCTGCTTCTCTCTTGAAC  
TTCGATCATAATCATACCTCCTGTCTCTATCCCTTCCCCGGTCTCTGTCATAATCATACCTCCTGTCTCTATCCC  
TTTCACGATCTCCCTCATAATCATACCTCTTATCTCTATCCCGATCCCTACCCCTCTCCCTTTCTCTTTCCTGGTC  
CCGGTCCCTATATCGATCCCTATCCCTATCCCTATCCCTATCACGGTCTCTGTCCCTAGGTCTTTCCTTCTCCCT  
CTCTCTGTCTCGGCCCCCTGTCCCTTTCAGAATTTTCTCGGTCAGATATATCACGACTTTGACTCCGGCGGATGC  
TGGGGGACCGTCTTGAATCATCTGCACCATCCTTATCATAGGGTGGTGGTGCATTGTACGTCGGATGGGAGA



TGAATCTCTAGTTGATGCACGATGAGGCGCACGCTGACCAAAAGACACTGAAAGGGAAGCTTTGACAGAAG  
 GTGGCCGACGGGAGGTTTCTCAGATCCGCGACTAGAGTCCCCGATCGAACCAGAGGGTTTGGTCGGCAGAT  
 TCATTTTTTCGAGATTGGCAACTGCTGTCCGCATAACAGGAACAGGAATGCGGGGTAATAGTGTGTCAAAT  
 AATACTGTCCGAGAAATAAGTCACGCACATATACGCCATTGTCTGTCATTTGGCCACTGGATCCAGGAGAGA  
 ATTCCTGCAAAAAAATTTATGTCCAGGCACCTTCAAGCAAGAGTGGTCCTTGCATCCTCATCATCTTTGAGAT  
 AAGGCTCATACCAAGCCCATAATGTCTTAAAAATCAGCAAGATATCTCAGATAAAGGAACCCAAACAGCTCTAA  
 TGTAAGGAGAATCTGGATGCTTTAACAGGCCATGCATTTGCTTGACAGTAAGTTTCATCGTAAAGAACTTGTA  
 GAGAAGGCAGAAGGCTGTTGAAGGACCACGACAGTTGCCAGTCATCCATGGTTCCACATGGTCAACTTGATT  
 ATAAATTTTCATCAATCACTTCGTGATAAGTTTTAGGCGCAATAGGTCTCTGAAATAATCAGAAGAAAGAAT  
 GTTCATGCACAGAACCTTCTCCAGCAATTGGTCGATCGGTCTCCAGAAGTTTAAATCTCAGCCATGCCCTTG  
 GTGATGTAGGCACCAAAGTGTTATCTTTTCTCCCTTTGCTTGGCCAACAATAAAAAATGATATTGGAAGAT  
 TAAGGTTTCAGATACCAAGTTACCTGTCACAGAAAATAGTGAATAAGTTACATAACATAGTGAACATAAACTT  
 GCAAAAACGTACACTAATATAATCACATTTTCAGCTAATACAACCATCCCATGTTTGAAAAAGTAAATGATCA  
 TTACT

>TCONS\_00013708

GCGACCAACTACCTCCATGAACCACCAAGTCTGATAACCTCCTCAGTACTTGTATCCCTATTTGGAGCTCTCTC  
 GCCGCCTACGTTCTCCTTTTGATTGCCTAAGTCCCCATATAGATCTTTAAGCTTCGCAAGATTGCTAGATGCAG  
 CCTTCTTTTCTTGCTTTCATCTCTAGGTGGAGTTCGATGTTGATCAAGACTGGTCCCTAGATCATGCAAACCTC  
 GGCTGTGGCTTCGACTCCTACTCCGGCTCCTGCTCCTCTCATAGTCTCTTCTGCTTCTCTCTCTTGAACCTTCGAT  
 CATAATCATACCTCCTGTCTCTATCCCTTTCACGATCTCCCTCATAATCATACCTCTTATCTCTATCCCGATCCC  
 TACCCCTCTCCCTTTCTCTTTCCTGGTCCCGGTCCCTATATCGATCCCTATCCCTATCCCTATCCCTATCACGGT  
 CTCTGTCCCTAGGTCTTTCTTCTCCCTCTCTCTGTCTCGGCCCTGTCCCTTTCAGAATTTTCTCGGTTCAGATAT  
 ATCACGACTTTGACTCCGGCGGATGCTGGGGGACCGTCTTGAATCATCTGCACCATCCTTATCATAGGGTGGT  
 GGTGCGATTGTACGTCGGATGGGAGATGAATCTCTAGTTGATGCACGATGAGGCGCACGCTGACCAAAAGAC  
 ACTGAAAGGGAAGCTTTGACAGAAGGTGGCCGACGGGAGGTTTCTCAGATCCGCGACTAGAGTCCCCGATC  
 GAACCAGAGGGTTTGGTCGGCAGATTCATTTTTTCGAGATTGGCAACTGCTGTCCGCATAACAGGAACAGGA  
 ATGCGGGGTAATAGTGTGTCAAATAATACTTACCTGTCCGAGAAATAAGTCACGCACATATACGCCATTG  
 TCGTCATTTGGCCACTGGATCCAGGAGAGAATTCCTGAAATAAATAGTTAATAATCAGAATGAGCCCTAAAA  
 ATCAACTCCCATCATGAAGATAAACATCATAGGTGAACAAACTAAAGACATAAT

>TCONS\_00013751

GCAGCAGTATAGATCTTTTCTCAAACCTCACTGCAATTTTCTTGAGCTCCTGAACTCCTCCTTCTCCACTGAC  
 AGGAAGATGCCTCTTTAAGGTCTCGGTTATGTTGTTGATAATCCTTTGACGAGAATCGGGTAGAAGTTGAGTG  
 CGCCAATCAGCAGAGTCCATAGCTCAATTCTGATCTAAGCGATTATTTCTTCCAATCGAAAATCAGTTTTACT  
 GCTTCTGATCAAAGAAAAAGAACAAAATGATGTTACGAGATATTCGGGAGAATATAGAATCCGAGATAGAT  
 TACAAC

>TCONS\_00013789

CCTCCATCCAAAGATATGGCTCCATCTCTAATACAAGGGAGAGCCTGTAACATATCTGCTCTTGTTCTATATA  
 CATGCAAGCGTGAAAACAGGTTATAAAAGAGAGTCTCTCTTAGACCGTAACCACTGCTTGTAGCACAATATA  
 AGTTCACACTGTCTATATTGACCATATTCATAGCAAAGCCAAGAAACCCAGGTGGAGATTCCCCATTGGGTA  
 ATCTTGGCTTCAAATATCAAGCCTCCTTTGAGGGTTCGTCAGCTATGAACTACCGCCATATGGTCATAAGTTT  
 TCAAGACTGATAACAAGAAATCGGCCATCCAAAGACCTCCCAATAGAAGATCCAAGTCCATGAAGACCAGA  
 AGTCTTGTTTATATAGCCTTCCTTATCGTATGTTTC

>TCONS\_00013844

GTTATTTCCAGGTGCTTTTTGTTTCAGATATTCAGCTTCCGAAAAAAGGATTTTGATGAATGTTCTTTTCATCGGC  
CTGGTCATGTAAGTACAGCCAGCCTTTTATACATTTACACTAAAATTCTGTACTTTACGCCAATAACCCAAAC  
TGAGCACCGAGCATTCTCTATCAACACGCTGGCTCCTGTTTCAACTTGATTCCACTTCTGCAGCCAAACATCAT  
GGGCTGAGCTGGACTGAGCAAAAGACTACTAGCAAGCTCCTCATTCAAGAAGACAGGAAGTGGTGGCATT  
GGCTCATAATCCCTGGCATAATTTCCCATGTCAATTTAAAATCGCACTTAAATTGTTCTTCGTCTGGAAAAAGAGA  
TCAACGTTGTCCTGCAACTTGAATGTTGAGAGGTTAGCTGAAATTTTATTGAGGACCTGATTATTTTCTTCCAA  
TAGACGCCTCGTTCCAAGTAGTGCTGCTAAAACCAAAAAACCATTATACAATTAGAGCCAATGCCGCACTA  
ACAATGCAAGCTGCAAAACCAAAAGCACAGAAGGAAATAGAGAATAGCACTGTAGATAATCTTTGTTTTT  
GATAAATTAGCAGAGAAAAAGATTAATTGGTAGTTTTAGCAAGAGTTCTACCAAATCACAATAAATGACATT  
TTGTAGCGC

>TCONS\_00013879

GAAAAAGATAACAGACAGGAGTAAAAAATGGATTGAACGTGCTCATCTTAGAAAACATCCGATCAA  
GAAAAGAAATTTTCAACATCCTACTGTTGATGGCCAGAACAGAGTGCCAGCCACCAAAACAACAAATGAA  
AGATTAAACAACCTGTTGCTGGGAATTTAAATATCAAAGTCTAAACATGTGTTGTCACGGACTACGAAAAGGT  
ACCAAGTAAACCTCTGCAACGGCCCCAGGGATATACAAGTAAACAAACAAGATGCATTGGCGGTCTGTGG  
TGATACCTTTATGTAATTCTACCTGATTGTCACAACTTGTTGGTACCATGTTTAGCCCAGTGAGTCCTCAGA  
TCAATTGGATTAGCAAACTGTATCCTTCCGCAGCAAGTTTCTCCAAAACCTTCTTGAATGCACCTGGCTCAT  
CTTTCTTCCAGCAATCCTTGCTCCGCGTCTTTTAGTACTCATTGGCAGCGGATACATTGATATACTAGTGGTAC  
AACAAGCTGACTGCCAGCCCCACATCCCCATCGATAACATTGCTGAGGAGCACCAGTGCCAGGAGCAAACT  
GGTATAGGAATGCCAGAAATGTCCATATCAATTCCATTTATTACAATGTCCATGCTCTTCTTTGCTGGTTTTGCT  
CGTTGAACACGGGGAGTCCCATTTTCTTAGGTCCGGACGAGCCTTTCTTTAACTTCTTCGCTTTAGGAGCTTT  
AGGAGTGGCACCACCTGTCTTCTTGAAGGACCACTTTCGTTCTTCACACTTGGTTTCTTGCATTACCCCT  
CACATCCTCAGTTACATCAGGTTGCTGTACCATTTGCATGGAGTGACTCGCAGAAGTTTCAGGGAGAACTGTC  
GTGTAAGGGTTCCCCGGAACATATGGAGAAATTTGTCTCTGTGATTTATCCAACGTGCCCTTACATAATCTAT  
GTGAGATAAAGGTGCTTCTGGAACGATAGAATCCCGAGAATGGTACATCCCGTTAGCGCCGAGCATAATAGG  
ATTCTCACGCCTAGTTAGGAAAGGTTTCGTATCTCGATCAACCACCGATGACATCAGCTGAAGACCTAGATGC  
CCTTTAAGGGAAGGTTTATAATAACCCAGTTCCTCATGTTCAAACCGTCGTCATCCATCAATAAATTGTTGG  
TAAACAGTTCTTAGGTTTTTTTCTTCAGGAGAGAGAG

>TCONS\_00013910

CTGTCTTAAAGTCAAGTTGGGAGGTGCATCTTTCTCACTTGGTCCACTCGCTGAACCATCTAATAGTACTGATC  
CGTCACAACCCTGGACAAAACAGTCATGGAAGTGAAGGCGAAGAAGGCCGGCAGCCTGGCCAATATCCTGC  
CAGAAAACCTGCCGGAGGCGGCTTCTGATGATGGATTGAGCATTGGGGCAAATGGAGTCATAGAAAGTCCAT  
GAAAGACCCTTCACAATTGGTTGCGTACCTTGAGCTTCTGTTTGATGAATGTGGACTGAAAGTAAAGCAGAA  
ATGATCAGCACAAG

>TCONS\_00013971

TACCGTACACATGGGACGGCACATATCTCAGCAACCCATGACAGCACAATTATACACAAAGCTACCAGATC  
GCTTTCGCCCAAGCAAGTTCCACTGAGGCGGTCTTCACTTGGAAACCCACGAATTAACCTTCGATAATCCCTTC  
ACCCATGGCTCTAGGCCCTCCAATTACAATTAGCCTATCACCACAAGCTCTAAAAGCCAAACCCCAACCATT  
CATAGAACCTGCTCTTTGAGGCAATCTTCTATGGTAACCCATGCTTTATTTTTCTTGTACATACTTCCTCACTTC  
CATGTCAGCATAATCAGCAGCATACAATTCATTATTTACAACCTGCCACCAAGGAGGTGCTTCAGATGTAGC  
AGGCATATTATCATCCCTAGCTTCACCAGCTCGGACAGGAGACATGCTCGGGATTCTGTCCATTTTCTGTTT

CAAGATCATACTCCTCTCCACAGGTCAATAGCTTTGACTCAGTTCCTCCGATGCCTCCGATTACGTAAAATTTT  
 CTGTCCATGAATACTGCAGAACACATCTTACGCGGCTTGTTTCATGCTCGGTAGAGTCTTCCACCTTCCAGTCTC  
 TGAATTGTAAAGTTCTGCTGAGCTAAGGATATTGCCCTGTGAATCACAACCACCAGTTAGAATGGCAATCTCC  
 CCAAGACTGGCAGATCCAAACAAACACCTCGGTGCGTTCATCTGCATTCCGGATGACCAAGTGTTTGTCACT  
 ATACTGTAACGATAAATGACATGTGACAAGATCTCCTTTCCAAACACAAGAAGCTCTGTGCCAACTGCCAAA  
 GACTCCTTGTGAGAGAACACAAAGCATTTCATTGGGATTCATTGATGGTAGATGCATCCAACGGCGGCGACTA  
 GGGTCAAAAGCTTCCCATTCAGTAGCTGGCAAGAAAAATAAACCCAATGCTCAACCACACCATATTGCCGC  
 CGCAATCTATAAAGCTCCCCACTCCTCACTAATGAGTGAAAGCTACTATTCAAAGATGCAATAGCTCCATAAT  
 CAGACCTGGAGCAATGAATGAGACAGCTAATGGAGTTGTACGGCCAATGGCAGGAATAAGAGAACTTGAA  
 TCAGAATTATCTGCAGCATGACGCTGATTACTAGCTTCGTGAGCTGGTGATACTGAAGCATCACCTAAGGATA  
 TAACCACTTCTTCATTGAGAGCAACAGATCGCTTTGGCAACTTGCCTTGAACAACCTTCGTTCTCGTGATTATTT  
 TCCAATGGCCTTTTACCGTGCTGAACTTCAATCCTATCAAGGCTGTAATTCATGCAAGCTGCCCAGTTGCTTTC  
 TCTAGGAAAATCCCTCGGTACCAACAAGACCTGTCTTCCAACATGTCGTCCAGGTTACGCCCTGAAAAGAA  
 GCACCAGTACCACAGCCTAACTTTGATCTGAATTCTCAACCTTATGCTCTTCCTCACCAAACCTGATATCTACTG  
 ATTTGGATTTCATGTGAGAAGAACAATCTGTTCTCTCTCTCTTTCTCTATGTATACATCTTCAGGTTAAAATTCTA  
 CTCTCTGTGTGTGTATGTGTGTGTGT

>TCONS\_00014044

GACAGTTACAGGAAATCTATAGGTCCAAAATCTAAGATCCACATCATACAAGAAAACGCAGATCGACTGAA  
 AAATATTTTACCAATGGATCTCCAACCAGTAACTGACCCCAAAATGTAAACCGGAAAAAAAAAAAAAGAAAAA  
 AAAGAAAGAGAACATGACACTCAATAAGCCTCCAGAATTGGGAGATAACAGGCTGCAGGATCTTCCTCACA  
 GTTGTCACCTTGTAATCCAAAATATTGTGCGACTGATGTAAGGTGATAATGTGCGCCTAACAGGC  
 ATGTGTTTGCTAAGTTTCCCTTTACATGAAATCATAATCATCATAACCATCATATGCATTTACCACAGCTTCA  
 TCATCTGCCTTATCAACATGTATCTGCTTCTTCTTTGCACCTTTCTTTTTACTTGCATTGGCTTCCTTTTCTGCTTT  
 AATCTTCTCATTTGCAATTGCAGTAACAGAAGAGGCAATTTCTTTAGCATCTGCACCTTTCAACGCAGTCATTG  
 ACAATCTCATAACAGCCTTGAGCAACCCAATATAATGGTAGCTTTTCTCATATGGTTCGAGCTTATGAGAAAT  
 CAGCTCAGCATATTCCAAGAAATCATCTCACTTTTGGGGATGAAATTGTCAATGGTCTTGTGCATCACCACCTT  
 TCGTGGCGAACAATTCAGCTGTGGACTTATAATCAGCTTCTTCAACAAGCCTTTGCTGGCGAAGTTTTTCTGCT  
 ACTGGATCTAGAGGCTCTTCCTTAGTATGAATTTAGCTTCTTGCCTTTCTTTTTCAGTAGCTTTTGCAGCAGAC  
 TTCTTGGGGGCTTCTCAGCAGGAGGTTCTGGTTTAGGTGCCGGAACAGGCTCCTCTTCATCTTCCACGACTC  
 TTTTACATCATTATCATCTGCGTCTTCGTATCCCATTACTCCTTGGTTGTTCTTCTTAAGAAGATCCGGAAC  
 TGGCACATCCTCCCAATCCTCCATCTTTAGTTGATTCTCTTCTGTCCACAAAACTTGTAATTCGAGTATCAG  
 TACGATGGATGGGTGAGTCTCGCCGACGATGCCTTCCGACGGTGGATAAAGCGACCGAACAGAAAAATCTCCG  
 ATCGGTGGGTGCTAAACCCTAGTAGACTCCGCAATTCTTATCGGCTTGCAGCGCAGCTAGGGAGATTGAAGGT  
 ACTAGAGGAACGTGAAGAAGAATCCAGAAAATCTGGTCGTTTAGGGTTAGCGTCTGGTCTCCCATTTTAATAT  
 CCAGATTCTATTAGACGGATCCGGG

>TCONS\_00014045

GACAGTTACAGGAAATCTATAGGTCCAAAATCTAAGATCCACATCATACAAGAAAACGCAGATCGACTGAA  
 AAATATTTTACCAATGGATCTCCAACCAGTAACTGACCCCAAAATGTAAACCGGAAAAAAAAAAAAAGAAAAA  
 AAAGAAAGAGAACATGACACTCAATAAGCCTCCAGAATTGGGAGATAACAGGCTGCAGGATCTTCCTCACA  
 GTTGTCACCTTGTAATCCAAAATATTGTGCGACTGATGTAAGGTGATAATGTGCGCCTAACAGGC  
 ATGTGTTTGCTAAGTTTCCCTTTACATGAAATCATAATCATCATAACCATCATATGCATTTACCACAGCTTCA  
 TCATCTGCCTTATCAACATGTATCTGCTTCTTCTTTGCACCTGCTTTCTTTTTACTTGCATTGGCTTCCTTTTCTGC

TTTAATCTTCTCATTGCAATTGCAGTAACAGAAGAGGCAATTTCTTTAGCATCTGCACCTTTCAACGCAGTCA  
 TTGACAATCTCATAACAGCCTTGAGCAACCCAATATAATGGTAGCTTTTCTCATATGGTCGCAGCTTATGAGA  
 AATCAGCTCAGCATATTCCAAGAAATCATTCTCACTTTTGGGGATGAAATTGTCAATGGTCTTGTCAACCA  
 CCTTCGTGGCGAACAATTCAGCTGTGGACTTATAATCAGCTTCTTCAACAAGCCTTTGCTGGCGAAGTTTTTC  
 TGCTACTGGATCTAGAGGCTCTTCCTTAGTATGAATTCAGCTTCCTTGCCTTTCTTTTCAGTAGCTTTTGCAGC  
 AGACTTCTTGGGGGCTTCTCAGCAGGAGGTTCTGGTTTAGGTGCCGGAACAGGCTCCTCTTCATCTTCCCAC  
 GACTCTTTTACATCATTATCATCTGCGTCTTCGTCATCCCATTTACTCCTTGGTTGTTCTTCTTAAGAAGATCC  
 GGAAGTGGCACATCCTCCCAATCCTCCATCTTTAGTTGATTCTCTTCTGTCCACAAAACTTGTAATTCGAGT  
 ATCAGTACGATGGATGGGTGAGTCTCGCCGACGATGCCTTCCGACGGTGGATAAAGCGACCGAACAGAAAA  
 TCTCCGATCGGTGGGTGCTAAACCCTAGTAGACTCCGCAATCTTATCGGCTTGCAGCGCAGCTAGGGAGATT  
 GAAGGTACTAGAGGAACGTGAAGAAGAATCCAGAAAAATCTGGTCGTTTAGGGTTAGCGTCTGGTCTCCCATT  
 TTAATATCCAGATTCTATTAGACGGATCCGGG

>TCONS\_00014057

CCCATGTATGGTTGTCCAAAATGGATTGTATCTCACTATTGACAGCTTCTTTCCAATATGGTGCTTCAGAAGAA  
 GACATAGTCTCCTTAAACGTTTGAGGCTCATTTTCTAGTAGAAAGGTTAAGAAATCTGGACCAAATGATGTAG  
 ACTTCCTTTGACGTTTGCTACGTCTTGGATTCTCCTCATTATGCATCTCATCATTTGTTTCTTCCCGTGGACGTTT  
 ATTCCTTGAATAGATGTCTCATCTTCAATTTTATATGGAAATAT

>TCONS\_00014134

GTAAGTTAAAGGACATAAATGAAAGAAAAGGGCCAACACCTTAAAGATACAAATAGGCTTCACAACAACAT  
 AGGTAAAGTTCCAACATTTGAGAGACCACATGACAACATGATACTACAGAATCTAACCTCCAGATTCAATG  
 ACAATACGAACCTTATTCAATTAGGTCAAGTAAAAAGAAAACATCAAAAGACCTCAGTTCTTTGACTGTCTC  
 GCAATCTTGAACCACTCGGTATGGTAAGACCCCGGCACATCAATCCTCTCATATGTATGAGCACCAAAGTAA  
 TCTCTCTGAGCTTGAATCAAATTGGCAGGAAGTCTTCCCTCCTGTACGAGTCAAAGTAAGCAAGACTTGAAG  
 ACATACCCGGTGTACTAATACCCGAGTTGATAGCTAGGCAGACTACTCTTCGCCAAGCAGACTGTCGTTCAAC  
 CATCTCTTTTGCAAACCTTTCATCCACAAGTAGATTAGCAAGATCCGGGTTTCTGTCATAAGCCCCCTTGATCC  
 GATCCAAAAATATAGCACGGATAATACAACCACCCTTCCAAATCCTAGCAAGCTCCCTAGTTTCAAATCCC  
 ATCCCTTTTCAACGCTCTTTGCCCTTATCAAATTCATGCCCTGAGCATAGCTACATATTTGGATGCATAAAGT  
 GCCTTCCTCACATCGTCAATCAACTGATTCTTACCCACGGACTGGTCAACAAGGACATCACTAACCCCGCTAG  
 CTTTAAATACTTTAGCTGCTTGAACCCCTTTCATCCTTAAATCCACTAAGGAATCTTGAATCCAATGATGAAGCT  
 ATTGTGGGTGCAGCAACTGACAGCTCAGCAGCTTGTGAACGGTCCATTTACCAGTACCTTTCATCCAGTTTT  
 ATCCAAAACCTTTGTCTACAAGATACCCGTCTCCTTTATCATCCTTGATTCCAAATATATCAGCTGTGATTCAA  
 TCAAGAAGCTCAGAAGCTCTCCTTTGTTCCAGTCCGAGAAGACTTGTTGTAATTCATCATTAGAGAGCTTGCC  
 AACAGATTTTAGCACATCATAAGCTTCTGCAATTAAGTGCATGTCACCATATTCAATTCCATTATGAACCATCT  
 TAACAAAATTTCCGGAACCTCCTTCACCAATATATGTAACACAAGGGCCACTGTCGACTTGAGCTGCAACCTT  
 TAGCAAGATGTCCTCTATGTTCTTGTACGCTTCAAAGAGCCTCCAGGCATCAGTGAGGGTCCGTTGCGAGCA  
 CCTCTTCACCGCCTGAAACTCCCATTCTAGATAAAGAAGACCCTTCTCGGCCATTTCTTTCTCTCTCTCTC  
 AGTGTTCTCATACCATTCATTGCCACCATCAATGATACAGTCTCCTTTCTCCATGTAAGCAGAAAGGGTTTTGA  
 TGGTCTGATCAACTGGTGAACCGGCCTTGACAAGAATGATTATGACACGGGGCTTTTGATAGAGAGTACAA  
 AGGACTCTGGATCATGAAAGCCATAAAGAGGAAGATTTCTTCTTTTAGCTCGTTCAACGGTCTCGTCAAC  
 TTTTGAAGTGGATCGGTTGTAAACAGATATAGGAAATCCTTTCTCAGCAATATTGAGAGCAAGATTTTGTCCC  
 ATAACAGCAAGCCAGCAAGACCAATTCTTGTGCGGTGTAGCCATGTTGGTTACCTTTAACAGATGAAACTGA  
 CTCAAGAAGATTCTTTACTACCTCAACCAAGAACCAAGATATAGTTGTATGAGATTTACGTTAAGTAATTGA

AACAACAAACAATTTATGGACTGGGGTTGTTGAGATTACGATTAGATTTGTGGAAAATTGAGTATAAATAGT  
GAATGCATGAAGATATAATTGAATGGTGTGAACTCACCT

>TCONS\_00014221

GTGCTGAGGTAACAGCGAAGTTAGATCGTTCATGTCCACATCATAACATTGCTCTGTTTGTATAAACTTGGTGTCA  
AGAACTTGCTTTCCGCACATTGCACATACTCTTGCCATCTTGATGCACTTGTTGCTTGCAAATCATGCACTTTGT  
ATTTCCATAAGGTGTCCACCTTTTTTTCTTGAGAGGAGTTTGTTCCTCGTTAATCTTACGGCCGCCGCCCTTCAGT  
AGTGTTACTGGCACCTTCTTTCCATTTATCGGGCACAATTACCTTGGACAACCTTCTTCTCACACTTTTCGCAAA  
CCATAATTGCACTTCGCGAGTTTGATCGATTGAAAGTATGC

>TCONS\_00014222

ACATTTGATAGCATTACAAAGAAAGAACAGTTCTCTAGAATAAGAGTGCTGAGGTAACAGCGAAGTTAGAT  
CGTTCATGTCCACATCATAACATTGCTCTGTTTGTATAAACTTGGTGTCAAGAACTTGCTTTCCGCACATTGCACA  
TACTCCTTTACTATAAGCACAGGTATGACAGTACTTGCCATCTTGATGCACTTGTTGCTTGCAAATCATGCACT  
TTGTATTTCCATAAGGTGTCCACCTTTTTTTCTTGAGAGGAGTTTGTTCCTCGTTAATCTTACGGCCGCCGCCCTT  
CAGTAGTGTTACTGGCACCTTCTTTCCATTTATCGGGCACAATTACCTTGGACAACCTTCTTCTCACACTTTTCGC  
AAACCATAATTGCACTTCGCGAGTTTGATCGATTGAAAGTATGC

>TCONS\_00014223

ACATTTGATAGCATTACAAAGAAAGAACAGTTCTCTAGAATAAGAGTGCTGAGGTAACAGCGAAGTTAGAT  
CGTTCATGTCCACATCATAACATTGCTCTGTTTGTATAAACTTGGTGTCAAGAACTTGCTTTCCGCACATTGCACA  
TACTCCATCTTGATGCACTTGTTGCTTGCAAATCATGCACTTTGTATTTCCATAAGGTGTCCACCTTTTTTTCTTG  
GAGAGGAGTTTGTTCCTCGTTAATCTTACGGCCGCCGCCCTTCAGTAGTGTTACTGGCACCTTCTTTCCATTTATCG  
GGCACAATTACCTTGGACAACCTTCTTCTCACACTTTTCGCAAACCATAATTGCACTTCGCGAGTTTGATCGATT  
GAAAGTATGC

>TCONS\_00014232

GCTGAGGGCCTGGTTGTGAGGATATTAATACCATAGCGCGTGAGTTATCCGCGTAGCACGTGAGTTGACCGTG  
CGGGTTCAGGTATTGATACCATAGCGCGTGAGTTGTCCGCGTAGCACGTGAGTAGACCGTGCGGATCCAGGT  
ATTGATACCATAGCGCGTGAGTTGTCCGCGTAGCACGTGAGTTGACCGTGCGGATCCAGGTATTGATATGGTA  
GCACGTGAGTTGTCCGTGCTTAGCGCTTGGGCTTTGGGAGCCCCCTCCGGAGTCTGTACACACCCCCAGTGAGC  
GCAGAGTGTTGAG

>TCONS\_00014233

GCTGAGGGCCTGGTTGTGAGGATATTAATACCATAGCGCGTGAGTTATCCGCGTAGCACGTGAGTTGACCGTG  
CGGGTTCAGGTATTGATACCATAGCGCGTGAGTTGTCCGCGTAGCACGTGAGTTGACCGTGCGGATCCAGGT  
ATTGATATGGTAGCACGTGAGTTGTCCGTGCTTAGCGCTTGGGCTTTGGGAGCCCCCTCCGGAGTCTGTACACA  
CCCCCAGTGAGCGCAGAGTGTTGAG

>TCONS\_00014243

TTGAACACTCAACTCCTATAGCTGCTTTGGGAGTAATTGAAGAAATCTGAACTGTATTCTTGACTTCCAAAGG  
CCATTCTTTGAAACATTCTTATCTGTGCAGATTGTTCCCTTGAATCAAAAATTTCACTTTGTCCAGGTTTCATT  
CATTGGACAGATCTGACAGCTCATCCATGGAATCTAGAGCTCTAACCACCTGGCTCATACGAGGCCTTTTTGG  
GCCTGAATGACGTACACAAGCTGCAGCTGCTTCAATCATCCGGAACATCTCACTCGCAACAAAGTTCTTTTCA  
AGCCTTGGATCTACTATACCTTCAAAAATTTTCAGTCTCAAGTGCTTGAGCAAGCAAAGGTCGAGCCCATTCAA  
CCAGGCTTTCATCACCTAAGGGCTGAGACTGGTCAACAGGTTTCCGCCCCGTAATAAGCTCCAAAAGCACAA  
CGCCAAATGAATAAACATCAGATTTCTCTGTAAATTTTCCACTAGATGCATACTCTGG

>TCONS\_00014267

CACAGAAAGATAAACTGGTTACTTGAAATTAACAAAGTGCTCAGCATCTACATATCACCAAAGTTGTATTG  
AGTAGAACTTCATATAGAGTGCTAAATTGACATATCCACATGCACAAAATCTGACGGCCACAGTTAGCATC  
AGGCATGGACTGAGTCCATTTGTAAACCCAACAAATAAATGAGCACAAGAAAACCAACAAGTAAGAACATA  
AACTTAATATTGCCATCTGCCTGTACTTGGGTTGTGTCTTGAGCATTACGAACATGTGGCCCATGATATGCAGG  
AGTATATCCAAATGGGTAATTTGATGTGGTAGGATACGCTGCCGGGCCAGGGAATCCATGAAACTGGAAGCT  
GAGTAATGAAGGGAACAATCCACCAAAACCAGCCGACATTGTAAAGTTACCAAATCTTGCAAGTTGCTGTTGG  
AAAAAATCCTCCCATATGACCAAATCCAAGATTAGGAATATTATTTGATTGAGGTTGAGGAGCCGTTTCAGGT  
CGTTGTCCTGCAGGCCTGTTAGGAATTTCAAGGCCTGGGATTGGTTTCGATCTGGGATCAGTAGAAGTCCTTC  
CTCTGCCATAAAGAGGAACATAATTTCTCCTCCTGAATAAGGGCCTTACAAACAGGGCATTTCATGGGATTGTGA  
GTGAAGATGTAGCCATCTATAAAGGCATGGCCAACAGTACAGGTGACCACAGAGTGTCACAATGGGATCTTG  
CGCCAATTCAAAACAGATATTGCATTCAAAATCACCAGCATCATTGCTCCCATCCCCAGAGGAAGAAGAAGA  
GCTTTCAAATGCCCTGGTAGTTGAGTCCTGCATCTCACTCAGATATATCGTTTCTGAAGAAAAGCAAGGGGGA  
TTCGGAGGCAATTAATGGATCGAAGATAAAAAAGTGTAATTCGAGCCCTTCAATTAGTATTGAACAAGTAC  
TGATCCCAACAAAGATGATTCTAGGGCTTTTCACCCTCTCTCCC

>TCONS\_00014268

AAGAGAGACAAATACTGTACATAATGTAATCGAGGAGGATCTCAGGACAAAGATCTCTACTCTCAATCTCTT  
TTAATTTACTGCAATTTCTAAGACACCTTAAGATTCAAGAGTATAAGGTGTTTGCAGCAGATCATAAGGTGCC  
CAGAGGGCATCCAGGGGACAAGGGCGGTTTGAATCGAGTCGAACCCAAGGCTTCCCCTTTCCACTCCAATGC  
AACAGGCTAACCGGACCAGGGTGCAAATCTCGGCAGAGTCCACGAAAATTATCTCCGCCTAGACCATGTTGG  
TTCCACCTATGATCTACAGGTGCTATATTTCCAGCAAAAACAAGCAGAAAAGGCGGTAAAGAACCCAATTCA  
TAAATCCTCATTCTCTTTTGAACCTCCATCCACTCCACAATCTTTGTAGTATAATCCCCTGCTCTCCATCTATCA  
AGATCAATAACCATAACCCCTGTATTAATAACAAGGTTTTCGGTTTTGGTTAGCGAAAGTTAAGGAAAGT  
GAAGGGTTAGACCAAAACGTGGGCGTGAAGTAAGTAGTGAAATTGGCATTGCAATATTCAGGTGCTGCTAAA  
ACAGAGTCCTCTATTAGAGGTGTTGCTGCTAATTTAGCAATGTCGTCAACTAGAACAAAGATCAGAATCAAGA  
TAAACGACTTT

>TCONS\_00014283

TGTGGTTGGGCCGAAGACTCCGTTGCTGTCAATAACAGTAGCTGATGATGTATTGCAGTGTGAGCCAAGTGCC  
ATGCAAATATTATGTTCCCTATCTTTTGTGTTGAAATGTCCAAGCTAGTCAAATTCTGCATGTGATTAGCTAATA  
GTCCGATTCTGATTTCCCAAATTAGCAGCTTCGCCTGATGTCATACCATGGACCTCGAAAGATATTGATATCA  
ATTTTAGTTG

>TCONS\_00014325

CTTATTATAACCCTCTTTACTTCCTCATACTGTCACAAATTACAGACCCATTTTCCAGTTAAGAGAAAAAAG  
AAATCTATCAATGGGGCGTTCCGCTTTCGTTGTGGCTGTTTTTCTCATGCTTTTCTTCTCTTTCTCATGGGATC  
GGCAGAAAAATGATCGGTTCTTCTTCCCATGGCGATACCCATAGAGTTTTACTTGAGGTT

>TCONS\_00014363

AATACGGTAGTAAAGTAAAAATGATGCTTTTCTCTTTCTGCTAACTTATTGGATATGAAATTTAGCTCGATAAT  
TACTAGGCAGCAAATTTAGGAGCTTCCCTGTGCTTGAGAATCTTTTTCTCGAGCTCATCTTTCTTAGCCCCGAC  
CACCCTCTCTACTTCCTTGCTTGCTTCAGCAGCAAAAATGTTGGCATAGCTTGCACTCCAAACTCTTGCTGCTA  
CATCCAGTTTATTTAATTGCTTGAGGAGTTGAAGTGAAGTTGCCACCGATTGGAAGAATGAAAAGCAATCA  
CACGCGACTGTTCTGACGACGATCCTGATTCTGCCTCTGCCGCTTCGGCCGCGCCTCCGCCGAGCAAACCTGA  
AAGATACGATCCCATAGGATTCTTC

>TCONS\_00014502

TTTTTTTGTCTGATCCAAAAGGTTTCAAAGATCCTTTTTTCAGGTTCACTTATTGTTGTTCCCTTCTCTTGTTGCA  
CATGTGTTGTGTTGTTGCTTGAGGAATCTTTGCCAGTGCTCTCTCAGAATCGAAAAAGGATTGTTTCAGTGCTTT  
CTTCACTCTATATTAGGAGGTGGAGTAGATCAAGAAATTGAAGAAGATGATGGAAGTGAAGAACTAGACCTT  
ACATGA

>TCONS\_00014560

GCATAATCTATAGCAGAAAGGTGTTGCAATTCATCTGAGCACTTTTCCTTTGGTGGAGGGGAAAGAAATTTCT  
CCAACAAATCTACATCTTTTTGTTCTTCTGCAGGAACCATATCAGATTCTTCAGCCACTCCATGTCCTTCATTA  
ACAGCAAAGTCCATAACATCATCGATCCGATCAGATGGTTCAGCTGACTGAGGAGGGGTTTGAGTGCTCGGT  
GTCCTAACCTGAAGAGCTGGTGAAGCTTTTTCTATAGATTCAACACTAACAGTTTGAAGTTCCTCTCCGTACA  
AGACTCTCCCACTGGCCATTATTTCTCCTTCCTCAGTTTCGGGAGACATATTAACCTCATCATGACCATAGTCA  
ACAATTGTAAGCCTTCCTCGTCTACTCACATTCACATTCAAATCCATCGGCTGAGGATTATTTGGAGAAGCGA  
CTGACATAAACGGCGTCGTAGTGGTAGACCCAATTACCCCT

>TCONS\_00014561

TAATCTCTTTAGAGGCATTACTTTTCATGTATATGCTTGGGTGCTGCAGCTGTAATATTTTCAGAGTCAGTGAATC  
TAATTAGATTGTCAAGATCTTCTATCTAAGTCTTGTCACTAGGTCGCTTCTCTTCTGCCTCTTTGCGTCTTTGTT  
GCGCATAAGCAGTGTAGCCAGTACCAGCATTAGCAGCTGATAAAAGTGCTGCATGTGCACCAACAGCAGAA  
ACAGGATCTCTCCGATCAACGTCCACCTTGTCCCACTTTGACTTTTTGTTCTGTCTACCATCCCGAGTTACAAC  
ATCTGGAATTGGCAAATTGATTTTTGGTGTAGGAACCATGGCTGCAGGTTGTGTTCCCTCCAGATATGAAGTCA  
ACTTTTGGACTCCTCTTCCTCTCTTGCTCCCTTCTCTCCATTTACGCTTCATTTCAACTTCTATTTTCATCATAGA  
AGTCACTTTTGTATATCCACGCGGATCAAATACGTCTTTACTGAAGCAAGATCCTATCTGGTCAATATCTTGA  
TAAGTCACTGCATGCAGCAAGAAGTCTGGATTCCGGTACTCCTTTCTGTTGCGCACTTCTGCATTAAAGCTTCT  
GCCAGTAGTCTTCTTTAAAGCAAGGAATTTAATGATCTTTTCTTGCAATTCATCTGAGCACTTTTCCTTTGGTGG  
AGGGGAAAGAAATTTCTCCAACAAATCTACATCTTTTTGTTCTTCTGCAGGAACCATATCAGATTCTTCAGCC  
ACTCCATGTCCTTCATTAACAGCAAAGTCCATAACATCATCGATCCGATCAGATGGTTCAGCTGACTGAGGAG  
GGGTTTGAGTGCTCGGTGTCCTAACCTGAAGAGCTGGTGAAGCTTTTTCTATAGATTCAACACTAACAGTTTG  
AAGTTCCTCTCCGTACAAGACTCTCCCACTGGCCATTATTTCTCCTTCCTCAGTTTCGGGAGACATATTAACCT  
CATCATGACCATAGTCAACAATTGTAAGCCTTCCTCGTCTACTCACATTCACATTCAAATCCATCGGCTGAGG  
ATTATTTGGAGAAGCGACTGACATAAACGGCGTCGTAGTGGTAGACCCAATTACCCCT

>TCONS\_00014595

CACTTACAGCAGTGATTATTTGTCTAACGTATTGTTTTAATGGCCTGGATCAGGTTTGTTAATCTTATGGAAGG  
TCATATTTGGATCGAAAGTGAAGGTCTTGGCAAGGGGTCTACTGCTATCTTTATTGTTAAACTTGGGATTCTTG  
GACGCTCAAATGAGCCTAAGCTTCCCTTTATGCCAGATTGCCTGCAAATCACATGCAGATGACTTTTCAAGG  
ACTAAAAGTTTTGGTTATGGATGATAACGGGTGAGTACAGATACTACCTCTTTATCTTTAGACTCTTATTTGTC  
CTGCTGTTTGACGACTTG

>TCONS\_00014638

ATGCCCTCTTGCTGAGCTGCACCGCCATGAGCCTGAGACATTGTTTTTAGCTGAGGCTTACCCCTCTCCTCCAC  
CTTTCCCGGGGGACGAGAAGGAAAGAAGGGCGAAACAATGCTAGTAATTTGAAAAAGAATTCGATAGAAGT  
ATGTTCTTACCATTAACAAATTTTCAGGTAGCAAACGATCTCAGAAAAAGAAACCATCCTCACCAAGATACTC  
GCTGCTAAATGGGTTAGTGAAGTCGTCGTAATCAAAGTCATCATAATCAAACAAATAGTCTGAAAGGCCAGC  
TTCAGACAACCCAGATGGGTATTCATCATTGGAAGAACTATAATCACAAATCTGAGCTCTAAATTCATAACC  
AGAAGTGGAATCACGAGGGGCACTTCAGATCCTTAATCTGTTGTCGACATCTCTTTCCTAAATCCCTTCAAGA  
TCAATACTATAACAGTGGCGCAAGTCAAGTGATTCAAGCCGCGGGCAGCCATCAAGAATGGCACACAGGCC

TTCATTTGTCAAGTTATTCCCAAAAAGTGCAAGGCGTCGCAATTCAGGCATATTTCTGCAATAGCCAGAGCT  
 TCATCATTGACATTAAAATGTAACTTCTAAATCCTCTGAATCCTCCAAATCCACTGTTGTTCAATGTAAATGA  
 CTTGAGCTGCGAGCAAGAACGACCGATAGCCTCTATATCAACTTTACTAATAACAGCTAAGTAAATGTGCAA  
 CTCCTCCAACAACGGGAAGTTCTTGGCAACTGCAGCCAAACCTCCATCTGAAATTGCTTCACAGCTGACAAG  
 TCTTAGATGCCTTAGCTGACTTGATCCTGGCTGCGATTACAGCGACGCGGCACATCCAGTCCAAGTCAGTAT  
 CATCTATGTCCACATCAATGTCGTTTCCCATGTCAATGTCCCGCCACATGATAGGGTCATGGCACACATTCCA  
 CCACGTACTACAGACTCTCTGTGCATTTTGAATATCTCTATCGCTCCCAACCGGAGAAGGATGTCCGCCGTG  
 ATTTCTCGAGGGAGCTCTACCCACGGCGGCGACGGCGGCGGGCGGTGGTTTGGAGGAAGAGGTTGACGCTTTC  
 TGATTTTGCTGCTTGATTCTCCATACCAACCGTTTTGGCTTCGGCATTCTCTGTGTTTAGGGTTTTGTCGTCTGT  
 GTTTTCTCCTAGTACTTTCTGATTA

>TCONS\_00014789

TTAGAAAAGAGAAGAAAACACAAGAAACAACAATGAACCAAGTTTTCTCACTTTGATTTCTTTCCCTGCTTC  
 TTTTTATCACTTCATCAATGTACATTATACCTTTGCCTTTGTAACTTCAGGGGGCTTACAGCTCCTTACAGAA  
 GCAGCAAATGATGCACCCTATATTTGTCAATCCCAGTGCAGCAAATCACATTGGGTTTGAACAGAACACG  
 CGAACTGCAGGGGGCACACTCAGTTCAACCTCATGACTGTAGCCAAGCTTGAGGTACAAGAGACGACCCTCG  
 GATTCTGCTCTAGCCTTGAAACCCACTCCAACAATCTTGAGAAACCGAAAGAATTTAGCTTCCATGGGATGA  
 ATTTTATCAATCAGCTTTGGACCTGCCGATGATTCTCTCACAGACGACTATCGGAGATTGAACCACTGCAACT  
 CGTAGTCGGTCATCAATGGTACTCGTCGTCGGAGAACCTGAGACTGAAGAGGAGGAACGGGGAGATTGTG  
 AGG

>TCONS\_00014930

TGCTATTAAGATATTTCTCCTTATCCACCCTAACTATCTGACCTTTCTTCATAGAGTAGACAGGTTTTTTAGGCT  
 TTGTTGCGGTGGCAGTAGAGGAAGTTGCTGCTGAAGCTGCTTCTTTGGATTTTGGCTTTGCAGGTTTTTCATTGT  
 CAATTGGTTCAGAGGGATTTTCTGCTTTAATAATTAAAGGTAATCTAAATGGGGTATTAATCTTTTTCTTGTC  
 ATGAGAAAGATGAAGAATATGTGAAGGAGGTGTGTGAAAAAGCTGAAGAGAA

>TCONS\_00014931

TTTGATATATTCTTGTCTGACATGTACTGACTGGTTCGAAATGTGGACCCTTTACTATATTCTCTCATAATCCAG  
 CTTATCAGACTTTATTAGCATCTCTGTTGGAAGCCAAGCTGGTGCAGTTGGTATTCCGATCCATCCAATAAGTG  
 CATATTCTCCTGTCTCGAATATGCGCAAATCCAATACCTCACCACGGTCTTCGTATATATAGTCCAAGCCTTTG  
 TAATAAGGTGGATGATCCACTGACAAATA

>TCONS\_00014960

TTGACATGAATAGTTAAAGGGAAATATCCAAATCCATGTCTTATTATTTTCAATAATCCATACTTGTAGCAAT  
 GAAATAACTCCCATAATCCATTTTCTCTTCACAAAATTCCCTTCAATCCCCCGTTTAGTTGACATGAATAGTT  
 AAAGGGAAATATCCAAATCCATGTCTTATTATTTTCAATAATCCATACTTGTAGCAATGAAATACTATATATT  
 CCTCCACCAAGTGATAAATGATTGATTACAAATATTTAGGATCTATTTTTCTTTTCTCTATAAAGGCCCAGAAA  
 TACCTTGTTTACGTATCATTGGAAAGTGCATTAACATAAATACGGCAGTCAGAAGCGGCAATACAAAACCTGT  
 GTAAACTATAAA

>TCONS\_00014961

TTGACATGAATAGTTAAAGGGAAATATCCAAATCCATGTCTTATTATTTTCAATAATCCATACTTGTAGCAAT  
 GAAATACTATATATTCACACTCCCATAATCCATTTTCTCTTCACAAAATTCCCTTCAATCCCCCGTTTAGTTG  
 ACATGAATAGTTAAAGGGAAATATCCAAATCCATGTCTTATTATTTTCAATAATCCATACTTGTAGCAATGAA  
 AACTATATATTCCTCCACCAAGTGATAAATGATTGATTACAAATATTTAGGATCTATTTTTCTTTTCTCTATAA



AGGCCCAGAAATACCTTGTTTACGTATCATTGGAAAGTGCATTAACATAAATACGGCAGTCAGAAGCGGCAA  
TACAAAACCTGTGTAAACTATAAA

>TCONS\_00014962

GACCAATCAACAGTTCAAGTCGCACACTCCCATAATCCATTTTCTCTTCGCAAAATTCCCTTCAATCCTCCCGT  
TTAATTGACATGAATAGTTAAAGGGAAATATCCAAATCCATGTCTTATTATTTTCAATAATCCATACTTGTAGC  
AATGAAATACTATATATTCCTCCATAATCCATTTTCTCTTCACAAAATTCCCTTCAATCCCCCGTTTAGTTG  
ACATGAATAGTTAAAGGGAAATATCCAAATCCATGTCTTATTATTTTCAATAATCCATACTTGTAGCAATGAA  
ATACTATATATTCCTCCACCAAGTGATAAATGATTGATTACAAATATTTAGGATCTATTTTTCTTTTCTCTATAA  
AGGCCCAGAAATACCTTGTTTACGTATCATTGGAAAGTGCATTAACATAAATACGGCAGTCAGAAGCGGCAA  
TACAAAACCTGTGTAAACTATAAA

>TCONS\_00014963

TGACATGAATAGTTAAAGGGAAATATCCAAATCCATGTCTTATTATTTTCAATAATCCATACTTGTAGCAATG  
AAATAACACTCCCATAATCCATTTTCTCTTCACAAAATTCCCTTCAATCCCCCGTTTAGTTGACATGAATAGT  
TAAAGGGAAATATCCAAATCCATGTCTTATTATTTTCAATAATCCATACTTGTAGCAATGAAATACTATATATT  
CCTCCACCAAGTGATAAATGATTGATTACAAATATTTAGGATCTATTTTTCTTTTCTCTATAAAGGCCCAGAAA  
TACCTTGTTTACGTATCATTGGAAAGTGCATTAACATAAATACGGCAGTAAGAAGCGGCAATACAAAAGTGT  
GTAAACTATAAAAACGGGTCAAAGTAGATTGTCCACACTAGCGCTTCCGCGCAATAATTGACCAAGGGTG  
ATCCTATTACAGGAATAGCGTCAGGGACACCTGTTACTATTTTCACTGCCCAATAACCAACTTGGTCCCAAGG  
TAAGGAATAACCAGTTACGCCAAAAGATGCGGTTAATACAGCCAGAACCACACCTGTAACCAAGTCAATT  
CGCGAGGTTTTTTAAATCCGCCGGTGAGATACACACGAAATACATGCAGGATCATCATTAGGACCATCATAC  
TTGCCGACCATCGATGAACTGATCGGATTAACCAACCAAAAGTTGGCTTCAGTCATTATGTATTGAACAGAAGC  
AAAAGCCTCAGTAACGGTCGGACGATAATAAAAAGTCATAGCAAACCCAGTAGCTACTTGTACTAAAAAAC  
AAGTAAGCGTAATTCCCCCTAAACAATAAAAATATATTGACGTGGGGAGGAACGTATTTACTAGTTATATCATC  
CGCAATTGCTTGAATCTCGAGACGTTCTTCGAACCAATCATATACTTTATTGAGATAGGCGTAACCTCCCCCTCT  
GAGAACCGTATATGAGACTTTCATCTCGTACAGCTCAAGCAAAAACACCCAAATACTAGTTGCAACGGATAT  
GGAATAGAAAGTTTTAAATTTATTAAGTTCTGATCCCATCTTCTCTGGAAAATCCGAAAGCTCTTCTTTGTGGC  
GATAATACAAAATATCAAGTTGGCGCAGTCATCTTTATCTTTATTTTGATACTTATGGGCCTCTTGAAT

>TCONS\_00014964

TTGACATGAATAGTTAAAGGGAAATATCCAAATCCATGTCTTATTATTTTCAATAATCCATACTTGTAGCAAT  
GAAATACTATATATTCCTCCATAATCCATTTTCTCTTCACAAAATTCCCTTCAATCCCCCGTTTAGTTGAC  
ATGAATAGTTAAAGGGAAATATCCAAATCCATGTCTTATTATTTTCAATAATCCATACTTGTAGCAATGAAAT  
ACTATATATTCCTCCACCAAGTGATAAATGATTGATTACAAATATTTAGGATCTATTTTTCTTTTCTCTATAAAG  
GCCCAGAAATACCTTGTTTACGTATCATTGGAAAGTGCATTAACATAAATACGGCAGTAAGAAGCGGCAATA  
CAAAAGTGTGTAAACTATAAAAACGGGTCAAAGTAGATTGTCCACACTAGCGCTTCCGCGCAATAATTGCA  
CCAAGGGTGATCCTATTACAGGAATAGCGTCAGGGACACCTGTTACTATTTTCACTGCCCAATAACCAACTTG  
GTCCCAAGGTAAGGAATAACCAGTTACGCCAAAAGATGCGGTTAATACAGCCAGAACCACACCTGTAACCC  
AAGTCAATTGCGGAGGTTTTTTAAATCCGCCGGTGAGATACACACGAAATACATGCAGGATCATCATTAGGA  
CCATCATACTTGCCGACCATCGATGAACTGATCGGATTAACCAACCAAAAGTTGGCTTCAGTCATTATGTATTG  
AACAGAAGCAAAAAGCCTCAGTAACGGTCGGACGATAATAAAAAGTCATAGCAAACCCAGTAGCTACTTGTGTA  
CTAAAAACAAGTAAGCGTAATTCCCCCTAAACAATAAAAATATATTGACGTGGGGAGGAACGTATTTACTAG  
TTATATCATCCGCAATTGCTTGAATCTCGAGACGTTCTTCGAACCAATCATATACTTTATTGAGATAGGCGTAA  
CTCCCCCTCTGAGAACCGTATATGAGACTTTCATCTCGTACAGCTCAAGCAAAAACACCCAAATACTAGTTGC

AACGGATATGGAATAGAAAGTTTTAAATTTATTAAGTTCTGATCCCATCTTCTCTGGAAAATCCGAAAGCTCT  
TCTTTGTGGCGATAATACCAAATATCAAGTTGGCGCAGTCATCTTTATCTTTATTTTGATACTTATGGGCCTCT  
TGAAT

>TCONS\_00014965

GCACACTCCCATAATCCATTTTCTCTTCGCAAAATTCCCTTCAATCCTCCCGTTTAATTGACATGAATAGTTAA  
AGGGAAATATCCAAATCCATGTCTTATTATTTTCAATAATCCATACTTGTAGCAATGAAATACTATATATTCTC  
CCATAATCCATTTTCTCTTCACAAAATTCCCTTCAATCCCCCGTTTAGTTGACATGAATAGTTAAAGGGAAAT  
ATCCAAATCCATGTCTTATTATTTTCAATAATCCATACTTGTAGCAATGAAATACTATATATTCTCCACCAAG  
TGATAAATGATTGATTACAAATATTTAGGATCTATTTTCTTTTCTCTATAAAGGCCCAGAAATACCTTGTTA  
CGTATCATTGGAAAGTGCAATTAACATAAATACGGCAGTAAGAAGCGGCAATACAAAAGTGTGTAAACTATA  
AAAACGGGTCAAAGTAGATTGTCCCACTAGCGCTTCGCGCAATAATTCGACCAAGGGTGATCCTATTAC  
AGGAATAGCGTCAGGGACACCTGTTACTATTTTCACTGCCCAATAACCAACTTGGTCCCAAGGTAAGGAATA  
ACCAGTTACGCCAAAAGATGCGGTTAATACAGCCAGAACCACACCTGTAACCCAAGTCAATTCGCGAGGTTT  
TTTAAATCCGCCGGTGAGATACACACGAAATACATGCAGGATCATCATTAGGACCATCATACTTGCCGACCA  
TCGATGAACTGATCGGATTAACCAACCAAAGTTGGCTTCAGTCATTATGTATTGAACAGAAGCAAAAAGCCTC  
AGTAACGGTTCGGACGATAATAAAAAGTCATAGCAAACCCAGTAGCTACTTGTACTAAAAACAAGTAAGCG  
TAATTCCCCCTAAACAATAAAATATATTGACGTGGGGAGGAACGTATTTACTAGTTATATCATCCGCAATTGC  
TTGAATCTCGAGACGTTCTTCGAACCAATCATATACTTTATTGAGATAGGCGTAACTCCCCCTCTGAGAACCG  
TATATGAGACTTTCATCTCGTACAGCTCAAGCAAAAACACCCAAATACTAGTTGCAACGGATATGGAATAGA  
AAGTTTTAAATTTATTAAGTTCTGATCCCATCTTCTCTGGAAAATCCGAAAGCTCTTCTTTGTGGCGATAATAC  
CAAATATCAAGTTGGCGCAGTCATCTTTATCTTTATTTTGATACTTATGGGCCTCTTGAAT

>TCONS\_00014966

GCACACTCCCATAATCCATTTTCTCTTCGCAAAATTCCCTTCAATCCTCCCGTTTAATTGACATGAATAGTTAA  
AGGGAAATATCCAAATCCATGTCTTATTATTTTCAATAATCCATACTTGTAGCAATGAAATACTATATATTCTC  
CCACCAAGTGATAAATGATTGATTACAAATATTTAGGATCTATTTTACTCCCATAATCCATTTTCTCTTCACA  
AAATTCCTTCAATCCCCCGTTTAGTTGACATGAATAGTTAAAGGGAAATATCCAAATCCATGTCTTATTATT  
TTCAATAATCCATACTTGTAGCAATGAAATACTATATATTCTCCACCAAGTGATAAATGATTGATTACAAAT  
ATTTAGGATCTATTTTCTTTTCTCTATAAAGGCCCAGAAATACCTTGTTTACGTATCATTGGAAAGTGCAATTA  
ACATAAATACGGCAGTAAGAAGCGGCAATACAAAAGTGTGTAAACTATAAAAACGGGTCAAAGTAGATTGT  
CCCACACTAGCGCTTCGCGCAATAATTCGACCAAGGGTGATCCTATTACAGGAATAGCGTCAGGGACACCT  
GTTACTATTTTCACTGCCCAATAACCAACTTGGTCCCAAGGTAAGGAATAACCAAGTTACGCCAAAAGATGCG  
GTTAATACAGCCAGAACCACACCTGTAACCCAAGTCAATTCGCGAGGTTTTTTAAATCCGCCGGTGAGATAC  
ACACGAAATACATGCAGGATCATCATTAGGACCATCATACTTGCCGACCATCGATGAACTGATCGGATTAAC  
CAACCAAAGTTGGCTTCAGTCATTATGTATTGAACAGAAGCAAAAAGCCTCAGTAACGGTTCGGACGATAATAA  
AAAGTCATAGCAAACCCAGTAGCTACTTGTACTAAAAACAAGTAAGCGTAATTCCCCCTAAACAATAAAAT  
ATATTGACGTGGGGAGGAACGTATTTACTAGTTATATCATCCGCAATTGCTTGAATCTCGAGACGTTCTTCGA  
ACCAATCATATACTTTATTGAGATAGGCGTAACTCCCCCTCTGAGAACCGTATATGAGACTTTCATCTCGTAC  
AGCTCAAGCAAAAACACCCAAATACTAGTTGCAACGGATATGGAATAGAAAGTTTTAAATTTATTAAGTTCT  
GATCCCATCTTCTCTGGAAAATCCGAAAGCTCTTCTTTGTGGCGATAATACCAAATATCAAGTTGGCGCAGT  
CATCTTTATCTTTATTTTGATACTTATGGGCCTCTTGAAT

>TCONS\_00014967

GACCAATCAACAGTTCAAGTCGCACACTCCCATAATCCATTTTCTCTTCGCAAAATTCCCTTCAATCCTCCCGT  
 TTAATTGACATGAATAGTTAAAGGGAAATATCCAAATCCATGTCTTATTATTTTCAATAATCCATACTTGTAGC  
 AATGAAATACTATATATTCACACTCCCATAATCCATTTTCTCTTCACAAAATTCCCTTCAATCCCCCGTTTAG  
 TTGACATGAATAGTTAAAGGGAAATATCCAAATCCATGTCTTATTATTTTCAATAATCCATACTTGTAGCAAT  
 GAAATACTATATATTCCTCCACCAAGTGATAAATGATTGATTACAAATATTTAGGATCTATTTTTCTTTTCTCTA  
 TAAAGGCCCAGAAATACCTTGTTTACGTATCATTGGAAAAGTGCAATTAACATAAATACGGCAGTAAGAAGCGG  
 CAATACAAAAGTGTGTAAACTATAAAAACGGGTCAAAGTAGATTGTCCCACACTAGCGCTTCCGCGCAATAA  
 TTCGACCAAGGGTGATCCTATTACAGGAATAGCGTCAGGGACACCTGTTACTATTTTCACTGCCCAATAACCA  
 ACTTGGTCCCAAGGTAAGGAATAACCAGTTACGCCAAAAGATGCGGTTAATACAGCCAGAACCACACCTGT  
 AACCCAAGTCAATTTCGCGAGGTTTTTTAAATCCGCCGGTGAGATACACACGAAATACATGCAGGATCATCAT  
 TAGGACCATCATACTTGCCGACCATCGATGAACTGATCGGATTAACCAACCAAAAGTTGGCTTCAGTCATTATG  
 TATTGAACAGAAGCAAAAGCCTCAGTAACGGTCGGACGATAATAAAAAGTCATAGCAAACCCAGTAGCTAC  
 TTGTACTAAAAACAAGTAAGCGTAATTCCCCCTAAACAATAAAATATATTGACGTGGGGAGGAACGTATTT  
 ACTAGTTATATCATCCGCAATTGCTTGAATCTCGAGACGTTCTTCGAACCAATCATATACTTTATTGAGATAGG  
 CGTAACTCCCCCTCTGAGAACCGTATATGAGACTTTCATCTCGTACAGCTCAAGCAAAAACACCCAAATACT  
 AGTTGCAACGGATATGGAATAGAAAGTTTTAAATTTATTAAGTTCTGATCCCATCTTCTCTGGAAAATCCGAA  
 AGCTCTTCTTTGTGGCGATAATACCAAAATATCAAGTTGGCGCAGTCATCTTTATCTTTATTTTGATACTTATGG  
 GCCTCTTGAAT

>TCONS\_00015301

CCATTTTTCATCTGAAGGGTAACCTCCTGCAAACTCCTCAGATACTGGAGTCCTCATTTTAAAGACAAAAAGTG  
 GAAGGATACTCAACGGCGTCAGGAAATACATCGGTAATATGAGGAATATTTAAACGAGCCTCAAATTCTCTC  
 TGATACTTTTACTACCAATTAGGATCACTAAAATTGGTGCTGCCCCCGCTGACAGCATTTTTCGGAGGCTCCGTT  
 TTTAGCTTGCACTCGAATTCTCAATCTCCGGCTAACTCTGCTCGGATTCCATACAGTTCTTAGCCTAACGGAAC  
 TTAAAAAGAGATCGTGATCGCTGTAAGTAGTTGTAGACCATAGAATCGCT

>TCONS\_00015302

GCCACTTTGGAATCGCCTGCACCCGTTCCACATAAGCTGCATTGGTCCCTGTACCTAAGTTAACAGCAATAGC  
 TACGTCGTTGTGTGTATATTTACCACCAGCCAACGTCCCAACAGTATCATTCACCAGAGCTGAGACCCGCATA  
 TCAACGCCCTTTCTTTTTATAGCTTTTGTGAGTTCTCCAACAACATCTTGGCCAACC

>TCONS\_00015427

GCATGAAGTATACAATCTACTCTCAAGAACCCGTAGAAGAATAATGTAGTAATTCCTTCTGTCCTTATAGCTC  
 TGGATCACCTAGGATATGGTTCAACTGTCAAATCCTAATAGGCGACCAACTATGTATTCATGTCAAATATAA  
 TCGACCATGGAATGACCTAAGAACTCATTTCTTCTTTTCAATTGCCCTAGCCAAGGTCTTAGTTTGGTCA  
 TCTATAATTCATGACAACATGGAGCTTAACTCATTACCAAGAGTTGACAGATTCCGCTTGATCAATCACTA  
 ATTCTACAAGCATTTAATCGTACCCAATATCCTTTCAACTATCGCCCTAGGGCCATAGGTGTCTGGTATCAAA  
 GCACAATAAATAACTTGTCAATTACTATGACGAT

>TCONS\_00015496

CTCTGTTAGAAGCAACTTTTATTGGGTTAGAACTTTTTGGTGGGGCAGAATTGGTTGCTTTCAGAGGAAGTT  
 GTGTTTCCCATTTGCTGCTAAAGTTCTTTGAGTTTGGATTTGAAAAAGTGCTGTCGTACAGTTTCTGTTGTGTAT  
 ATGAGGAAGCATTTGGAGATTCCAATGGGAATTATTAATAGAGCTAGTGGCCGAAGGAGGTTTCATCTGAGCC  
 CTCTTCGCTGGAAAATTACACTATAT

>TCONS\_00015570

TTGCCTGTCAATTCTGTTCTTGAGTTTCAACAAGAACTTCTCGTTATCTTCATCAGCAACTTTAACAAGCCTTTC  
AAGCAAATTCTTTCTTTCTAAAACACCAAGATCATCTACATCAACTTCAGCAGCAGCACCTTGTGATCCAAAT  
AATATACCTTTTCTTAATCTATCAAAAGTTGGAAGTTTTTCAAGAGCAGCCCATTAAAGTGCCTCTTCATCATC  
TTCATCTCTAGATGAACGTGAGAATATTTCTACACCATTATTTCTCCATATTGAATTGCTATTTGCCCTTAAACT  
CCCTCTCGTACTTCCTCTTAAACTACTCCCTCGCAAATTACTTAAATTTGCTGGCTCCAT

>TCONS\_00015748

AAAAAAATCTGTTCCAAACTTTACAGACTATATGTTTTTCTTCTCTTCCAATTTCTGAGCAGAGGCTAACAAA  
TATATCTCAGCAAGTATGGGAAAAAGTTAGCTAGTAAGGCACGGTGGCAGTAACAGTTCTGTGTCTTGGATC  
AGTGAGAACAGTTTGTACATTGGCAAAACCAGTTTCCTTCATCACTCTTTCAAGATCAGTCAAGTAGTATTCA  
TCCAGAAAAGGTTCTGTGCTCTTCATTAATGTAAACAGCACTGGTGGTAATTCCTGAAGAATCTTCGACTTTG  
GCGAGTTATCAGTTATAGCAACAGTTCCTCCAGGTCGAAGTATCCGAAATGACTCCTTCACTAAATTTCTTATT  
GCTCTTTCAGGACATTTCATGAAACACATAAGCAATTGAAACAAGGTCAAATGATTTGGAAGGCAAGCCAGTG  
TTTTACCATTTGTCATGTATCCAGCTTATAGGATTCTTTCTCTGGTTTCTTTTCTTTTCTTTATACTGAGCAACAG  
CAAGAAAATAAGGTGAAAGATCCAGACCAGTCACTTTAGCAGAAGGATATCTGTCCGCAAGATATCCCGTG  
GTCACACCAACCGAGCATCCAATGTCAAGAATGTCTCTGATTGAGAAGTCTCCTGAATATTGTTGATGATGTT  
TTTCGATTGCATCAAGCCAATTTCCGCGTACAATCTGATTTGCTTCTTCAAGTGAAGAAGCATTAGGTATTGTA  
CGTCTCACCATCGACATAGTTGCAGCCTCTACTTCAGCTGCAGCCAGCCAGGAGAGGTTGCCCTCGTCATATG  
CGTGGAAGGGATTTAGATAATAATCAGGATATGCAATGGCAGGATTCTGGATGCTCTCTAACTCTTTGTAAAC  
ATCAGAATCCAGTATCTCCTTTGTCATCTCCCTCCATGGAATATTAGTTTTCTCAGCTGTACTGATAAGAACTT  
GTCTGGCACCAAGTTTGAGTATAGAGAAGAGAGGTTTGAAGGAAATAAGAGCTCCAAGTAGAAGTGAAAGT  
GGGTTTTCCCTGTCCAACGAGGCCTTTCAAGTTGTCCTTCTCAAATGCCTCTGCAATTTGTGCATTTCCACT  
ACTACTTGTACTTGAAGAAGCTGACAATTTAAACCCCAAAACACTACGGCTTCTTCTTATTGGATTGTTAGTTA  
TGGTGAACAAATTGGGAT

>TCONS\_00015768

CTTGTTTACGAAAACCATAATACACAGAGAAGTTGTTTGAATTTCAATCGGAATTATGTATCACAAATTGGGA  
TAGAGAGTATGAAGAGGTAGCTCAACGTCATACAATGACTGCAATCATAAATTCGGTCTATTGAGCACGTTA  
ACACCAAGTTTATTGCTTACTGCCATAAGGACCATGGAGAGAGTACCTTTACAAGCACCAGAGTAAAGGTAT  
AACTAAAATGAAGAACAATAAGAGAAGTAAAAGTGCAACTCAAGTAGAATTGAATGTAGTGAATTATTCAC  
ATATTTACCAAATCATAAACTTTGGGGAAACCGACGGGGTGAAGTAGACTTAAGTTGGAAATAGATGTAAT  
ATATTTTTTTTCATAAAAATATATTACTGTAAGCCATAAATAAGATTTCATACCTTGGCTCTACAATATTCAGTA  
TTGATTACATTTTACCAAATCATCCACGGGAACAAACCCTGCCCCGCCCTTAACTTAATCTAATTAGGTTGGTAT  
TATTACGCCTATACTCGAGTAAATGCACACACAAGATTAAGGTAAGTAAATCATGCAATACCAAGTGATGTAA  
GATCAAAAGAGTAAACTGTAGATACAAATCAAGAGTGACCATAAGGATGTTCTTTGTCGTTGGGAACCCTTG  
CAGCTTTAAACGACATCAATGCCACTCCACTCAGAACCCGAAATCATGAGTACACTATGAAATCTTCGCAAA  
AACCAAGTGGGTTTTGTTCAAATGTAGCTTAGATGAGCACGAGAGACAGCATGTAGATATAGAAATAGGAA  
AGTAGC

>TCONS\_00015908

CAGCCCATTGGTCTACTAAAGAAGATGTAAAAGAGTTTGGTAGCTTCCTCGGTACATTGGCAAGGACTGCA  
ACTCTTTGCCCCGCTGGATATATTGGATTGGAGGAAAATGGACACAAAAGACGATTTATGGACATATACCAAG  
TTGAAGTATGATATTCCTGATGCTGCAAAAACATGAACTTTATTTTCAATTGGAAATGCTTGGAGAAGGCATA  
AAAGTCAACTA

>TCONS\_00016038

ACAGCATCTCCTCTCTGTGGAACCAGAAGCGGCAATTACGTCAAATATTGCTCTGAGATATATAGCTCTCCTA  
CGATTCAATGATCAAACAAATATCTTGCTCTGTGATGTTTTCTCGCTAACAAAATTGATTTTAGCAGCAACGA  
CTACCAAAGTTTGAAATCAACTTCTGTTAATGCTTGGGGGCTTCAAAGTTTATATTCTGCAGCTTCAGTCTCCT  
AGAAGCTTCTGTTTTTTGGATGTGTTTCATGTAAGGCCTTATGACCCACTCGGTTTGAGCTTCATCCTGATCCATC  
GTTCTAGTTTTATCTGGTAAAGCCGTAGTTCAAATCGAGGACCAACCTCTTTCAGCTCAATTGATTTTGGACC  
TCCGTGCTTTTCATAGATGTGATGTCTGAATGAAATGTAGTCTGACTGGTTAGCAAATGTGATAATACGTTTTG  
TATCAGGCTTGGGTACCGGAAACAAATGCTTTAGGATGTAACTGTCCTCTCACCAAGCTTTGTTGAAAATTT  
GTCAAAAATCAGATGTGGGTACGCCTCAGACATGGTTCCAATAGATTTTTTGTCTTTATATCATGTCTCGTGA  
CCACATTGAGCAATCCAAAGTAAGCAGTTGGACCAAAACGGCAGATGGCTAATGATAATACCATCAGGCACA  
CCACGATGCTCATGGACCAAAATTACATCTGTAAAATCATGAGCTCGGCAGGTTTCAATTATTTCTGATATAA  
CCTGACCACCACGATTCATCCGCTGAGCATTAGGGAACACAATTTTCAATTCCTTGACAACTGAGTAAGAG  
GAGCACTAGGATTTCTTGAAGTGGTAAGCAAAATTTTGGGATCTTTTTCAGTTGCATTAGCATATTCATCATCA  
ATAGTTGATCGGGGTACAGCAGTATTTTCGTCTTCAAGGTCGATTTCTTTGCGAAGAGCAGCCTCTTCATTCTC  
GAGCTCAGTTGGAATCGGTTTTCCCTCCTCCAAAGCTTCTTTGATTTTGCCTTTCTTCATATAACAAACGCTC  
CTTCCCTTCTAAGCTTTTCTGTAAAGGTACTCTCTTCGCAACCTAATGTTCTTCTATGCATGGCTTCCAAGTC  
GTTTGAAGTTTCTGTGCTAGTAGGCTATAAGAGATTTTTTGGTAGTAGGGTTTAAG

>TCONS\_00016056

TTTTGCATCCTATTCCACTTAATAGGGTGCCAAGATTAACATAAAAATGCTTGCTCCTCAAGAGCTTTTCCTCTC  
TGTATTATTTCCGAGAAATAAATTGCCTCTGTTCAAGGGGATGCTAGCCTTCATCACCACCTGTGTCTGCATCTG  
AAGATCCATCTTCGTAGCATTTCATTCATTTCTATCTCTTCTTCATCACTCTCTTCTTCTCCCGTATCCTCTTC  
ATCAACTACATTGTCCAGCTGCGGCAAAATGTCTATTCCCTTGCTTCGATAAAATTAACCCAGTCCTCATAACAT  
GATGAAACTTATCCCTGTGGCGAGTCAGAGGATGCGGATTACAAGTCTTCCACGACGGTACCCCTCTCTCAA  
CGCCACAGTCGTTGTCTTGCACTTCAATGAGAGGTAATAATATTCCCTGGATACCTTGTAATAAGTCGAGTAAAT  
CTATGTGGAAGATTTAGTTCCTCTCTCAAGCTCCTCAAGTAATTTCTCTTTGTTTTCTTGTATAGTGTCAAGCTT  
AGAAACTCATGTAAAACCCCAACTATTCTCTTTTCCATAAGATCACTATCGGGGTCAATTCCCCTTGAATCCTC  
ATAAGGTGAGATGTAAGGTAGCTTCTGAAACTCATCCATCCACGCCTTGACCTTCTTCTGTGCCCCATATCCCC  
TTGGGAAACTCATTGGGAATTCTAATGCAGCTTTGCCCTTTTAAATTCTCTATACCCAGGAGGGCTGCCATCG  
TCTATTGTGCCATCTCATTTCATCTTTTGCAACTCGGAGACAGCATATTCTTCTGGCCATTGAACAAGCTTTAA  
GCAAGCCAATCCATTCGTTCCCTTAAGTATCCTAAAATGATCAGGAAATTTCTTAATTAAATTCTTATCAAAAT  
CATCGGGCAATCCT

>TCONS\_00016071

TCCTCAATCACATTGTTGCTTCAAGTACTCGGAACCTCAAGAAGAGAAGACCCGATAACTCCACTCATAAGAC  
CCTTTGTGCGACATTCTGTATGTCGTGCTGCCAAATAGTGATCCCACTTCAACCTTGCTCCTTCAAATGAGTAT  
CTGCACAGTTACAGCAGAAGGTCAATGCTGGTTCTTCTGAACTCTGTAAGCACAGGGTAGATGTTCTCAAAA  
GCAGTATATGTCTCATCCCGGACCTTTGCTCCAGTGAGGACAATCTTGCCAGACACAAAAATGAGCAGCACA  
ATCTTGGGTGCTTCATTTCGGTATATCAATCCTGGAAACAATTCTGGCTCATAACTTGAAAAAGCACCATGCG  
AGTACGCCAAACCTTCAAGTCTAATGGGAAATTTACATCACAGGATCCAACCTATATTCTGAATCTTGAAATC  
CTTAAATTTGGCATCGAACCCAAGCTTCTGGATTATCCTTGCACTTCTTCTGCAAGCTTAGATGATTGTT  
CACTCTTTGCCCCGGTGCAAACCATCTTTCCAGATGCGAAAATCAAAGCTGTAGTCTTTGGTTCTCTTATCCTC  
ATAATAACAGCAGCAAAACGCTTTGGATTGTATTACGATTACGTGCTTGCAATGCAATAGCTTTAAGATCCA  
ACTTGCAATCCAAGTTGACAGTTGAGACAATATTCTGAAGAGTAGGCACAATCCCAGATGGGTGCTTAGACA  
AATCCACTGGTTGGCTCCCTTCTAGACCCACTTCAGCCATTCCCCTTGTTTCGTTATCCAACGGTCTCAAAATA

CCCACAAATTTCCACTTAGTCAAGAATCTCAAAAACCAAATTCTTAAAATTACAATTTCTTTGATTCAAGTTA  
AATCTTGACCCGATTGGCTCAATTAGGGTTTCCAATCAAGATCCAGAAATACAAAGATCCAACCCGAT

>TCONS\_00016179

GGATCATTC AATAGCTCGGGCTGTCTACTAAATCTCAAAGCAAAGTACTAGGACACATAGGAGTGAGTAGAT  
CCCGGATCAATCAACGCAAGTGCATCAAATGAACAGACAGAAAGAATACATGTAACCACTGCATTCGAGGC  
CTGAGCATCCTGTCTAGTAAATGCAAAAACCTCTCGCCTGACCTCTACCAGCATTGCCTTGTCTTGATTACA  
ATAGCACGATCTCCAGCACCTCGACCTCTA

>TCONS\_00016189

GCTGCTAACATGTTTAACAGTTTTTCAGGACAATGAGGCTGGTTTATACTCGAACCTTTTCATTTGATGTACATT  
CAGCTGCAGATGATAAATGTGTGAGTAATAAGCATAATAGCATAAATTAACCTCCCAGAGGAAAGCTGAGCT  
CTTCACAGTTCTTTTTATCTCTTTAATGCTGTAACATGATCGCGGATCATCACAAGATGGTATATTTACAAAT  
GACACCATCATAGATAGTCTCGTTATGGTCATGCTAGCTATAGAGGTATAGTAGATATACTTCGTCCTATGCTT  
GATATGGACATACAATAGCTTTGTACCATATCTCAGGTTATACCACCCTGTGGGGCTCAAGAAATGGAAGCG  
CCATACACACGTCTTCACTCTTCAGATACTTTTATTGTTGTTGAAGATGTAGCAAAGTTGTCTATTGATGAGCA  
TGATCTGAGGAGAAGGATGAGTTAGAACTATGGGTGGACCATACAAAAATCCTCCATAATGGTCTGCGCTTG  
TGCTTCTGGTGCTTAGATGTCATTTCCGACTCGGTTCTTCTGAGCATTTCACATAACCTGAACATCCTCATA  
GCCACAAGTTTGTATATCATCACGAAGCTTCAAAGCCCTGGACCATTTTTGCGAGCTTTAACACGAGCAGA  
AACAGCAAACCAAACACGCCGAACAGGAAAAACCATTTTTTGCCACCAATCATCCATTACTTTGAATTTGAT  
CTTCAATTTCTTCCTTCTACTTTTACACCCACCACCTCCCAATCTACTACCAAATCTTTAACCCGGCCAGAC  
CTTCTCTATTTTCCTTTCTTC

>TCONS\_00016218

ATTCTGAAGTTTTTCAAACAGTTGGAGCATTGAGAATATATCAAGGTTGTGCAAATGATTATGTCTTTTTTAGA  
AGATAGCCCAGAATGATGCCCAGTAATCCAATAATGAGAACATATATAGTTGGGATCCCACCACGACTACTG  
TTACGTTACGTCTCAAGAGCGCCAATTCTTGCTGAAGCTTATTATTTTGTGTATAACAGAATTTTTCTCTTCT  
GTCAGCTTTGAAATCAGTGCCTTTGTCTCCGACGAGCTGTCTTGCTGCTCATTATATGCCCTTGAAATATTATT  
AAACTCGGATGTATTTACAGCTCCATTTTCAGACACTGAGGCCCTAGGAGAGGAACCTTCCTCGGAACCTTCC  
TGCACAGGCGATGGTGGTTGTTGAGGTGGAACGTAAACGACTCTCAACTTACAATCCTCCACATGATTCCCCT  
CCTCCTTATTGAACTAAAACCAAAAAGTGGATATAAACCATGCTAGTTCTCATGAATATGGCACAAAAGGCC  
GCAAGTTATTCATAACAACAATTAAGTGTACCATCTCAGGTGTAATGTCCTTTGCAGCAGCGCCAGGGCTT  
GCAACAACACTTTGAAGTAGGAACTTATCCTTGCAATTGCATGTCTGCTGGAGCCTCCTTCTGTGCTTGCAATTG  
AACTGTGACATCGCTGGCAGAGTGAGGCATGACAACTCCAGTGTTGGGCCTTACACAATATTTCTTTGGATTCT  
GTCGTCTTCACCTTGAAAGCGACATAGTTATCGGACTTGTTGTCAATTGTATGGAGCATGAGATCTGCTTCTT  
CAATTCAAAGGGAACTGAAGCTCAAGAGGCTCGATTGAAAGTAGCTCTCCACCGCCGTTACTCATTCCGAC  
GCGATTTGCTAATCGGCCGAGAGCGATTTTCCGGTGCGGAAGTTGAACTTAGAAA

>TCONS\_00016225

CCGAGCTTCAAATCACTGGTTCTTGAAAGACTCAAAATTTTTGGACACATCCTCCACCTTACTAGCAAGTTC  
TTGCCTCTTTTGTGAGCCATTTAGATAGATCCTCCATTCTCCTTGATGACCTCACTGCAAATCTTTGAAAAG  
CAGGGCTGTTGGCGAGGCCATTGACGATTAATTCATTGGCGACATAAGAAATAACTCTATGAAGG

>TCONS\_00016263

GCTAGCTAAGACTGGATCGTCAAAGACCGGATTCCTTTTCTTAATACCTTCCTTATCTCTCCTAAGGGTCTTGC  
CCTAGGCATAACCTATATACAAAGAGTTCCAATATCGAATCAAAGCAAAGAGGAACAAGTCGGTCTAGCTT  
CTTACTCTTTCACCTTTCAAAGAAGTCGAAATAGAAAGGGGTAGGAAAGATCCCGTGTACCTTGTTCAAGTTG

CGGATCTCCTTCATTAGCTTTGAGTTCATTGTTGTTCTTCTGGTTCCTTTAAAAGGGGTCGTGGGGGAAAAG  
CCCCAGCCCCCTACATGCATTAAGCGACGACGGCTCAAACGAAGCAAACCATTCTCATAAGAGAATAGA  
AAATCACAAGAAAGATTTG

>TCONS\_00016311

TGTATAATGACCAGCTCCTTCCCATAATGCATTTAGGAAGTTTAGCATATTACACAGTATATGTGATTGGTCA  
TCACAAGATCATCAGCTCTTTTAACATAAACCCATATGGAATCTAATATATTTGCAGCATTGCACTGCAATGC  
ATCATTGTCTCCAGGTTGATTGTCACCATTGCATGATTCAGAAATTGGATTTTCCCTCAAAGCAATCACAGCG  
GTAAGAAAAGAAGCCTGATAACGTGCAGCAGAAGCAAGCATCTTGAAAGTAGCAATTATGAGATCCTCACT  
TTCTACCTTCTCTTGACAAAGAATGCTACAAATCGTATTTTTAAAATTATAGATCTGCTTGTATCCAGACCAA  
AATATGCATTGCTAAGCGCACATGATTGCGAGTCGTCTGCAATAATAACAATCTGGATTGCAGTCTTGCAGC  
ACCCACCTGTATCTTAGGATTTCCGAAGAATGACATCAATGATATCGCTGCGGTAACCACAGGCACTGGTTTT  
GTCGTGACGACATGATTGCCTGATGAAAGACAGTGAAATTGGGCACATCCCTTGAGAGATCAGAAAGCATA  
CTGGAAAGAATATCCAATCCCAAGACAATTGCCTGTTGTAAACCTTCGATTTCTGTCAGCCCATAAAGCCGGC  
TAAAATAGAGCTTCTCAAGGCCATCTGAAGTTGTACAAACAAGTCGAAATAGTGCAGTGTGGATTGAAGAAT  
CACCAAGTAAAATATCCGTGACCACTTCACCAAGTTTCTGGATATTTGAAATTGACAGAATGCATTTCTTCAA  
TACTTCAAGCACCTTCAGAGTCACCTTCCAGCGAGCATGCTTGACTTTATAATTCCAGAATTCATGATTAACA  
AGGACATACTGAATGGAGAAAATGACAAGTGCAAGGACAACATCATTTTCCATTCCAGCATCCACAAGCTGC  
ATGGTGAGGTCAAGCACTGAAAGAGTCAATTGACAATCATTCTGCTCACAGTCGATCAAAAGCATTTTTGAG  
AGCCGACCAGAAAGCAACCACGATCCACTCGACAAGCCATTGGAGCCAATTCTGAAAGGATTTGTTTTAAC  
GCAACATCAAAGATATTCGCCTGGACTATCAATCTGGAAACATGATACGGTGAGCATTTTAACATTTTGCCA  
AAATGTAACTCCCATCGACATCAACACCACATCAGAGCAATTAGGAGATAAATTCTTGATCCAAGCACAAA  
TGATCTCGGCCACATTAAGACGCAAGTTTTCTGTTGGTGAGTTCATCTCATCATGCATATAGCCACCACCAAG  
GTCCAGAAGAGCAGAACAAACACCCATGTTGAAAGTCACAAGTCGGCTGAGCAACCGAAGAGTCAGAAGG  
ACATCACTGGTTTTCTCCAAGTACAGCCCTTGGGCCAAACGCAAAAGA

>TCONS\_00016418

ATTGTTCCGCTGCTGCTCCATTATTTTATGGTATATGTTGCCTGAGCTCCTTCTTCTAGACACTGACCTTCCAA  
TGGTGAGCAATTAGCCTACTCAGGACAATGAGTTAGCGGGTTCACATTGTTGTTCTTACTGGGCAACCAGAT  
TGTGGTTAGAGAGCAGGTTTATGTGTGACGATAAGTGAAGTTGCTATATCACAAGAGAGCAAAGGAACTTGC  
TTCATTATTCTTCTGTTTCGATGGTCGCTCTGCT

>TCONS\_00016579

TGACAAATCTCTAACAGGAGACTAGGAGAGGAGAGACCATATACCGATTAAAAAGGGAAGAAAAACACAA  
TATAATAAATATACAAAACCTTAGCTGCCTAGGAATATGCTACAGAGCTCTTTAGACAATGGACTATCCCCTGT  
GCAGTTGCAAAAGAACTCTAAAATACATATATACAAGCATGAACTTGCTGTTCTCTGCTTCAGCGCACCTCAG  
CATACAACTACTCTCCGATTAAGTATAAACAAGCCGCACTACCAGCAGCTATAGCTTCCTGTCTTGGGTCAT  
CATCTTGGCCTCCAAAAGCCAGGACCTGCACAGCAAAAGCGACTGAGTTTTGCAATAAATATTTCTTTAGAA  
GAAGAAAATCTTGTTGTTTACTGCATTGAAAATAAAATTAAAAACAAGTTAGAAGGAGAAAGGCAACCAA  
CAAAAACAATAAATTGACACACCAC

>TCONS\_00016613

TCACAACTTGATTGGGCTGACTGTTGCATCTAGTGACGGGCAGATAATACCGACTTTTTTTCTGCTAGGATGTT  
TGACACCTAATTAAACAGTTCACTTTTTGAGATGAGGAAAACAGGCATAGAGATCAGATTTTGGATGTTTAGC  
TTCAGCATGCTCCTTGCACTTCACCTCTGATGTTGTGCACATAAATGTCTGCATACACACCTTGCACTGTATAC  
TCATGGCTTTTTTGTTCGTGTCGAGCTGACTTCCTTTGGAAGCTTTCGACTTCTCGAGATTCTTCTCGCGAGCCA

TCTTGCGCTTTCTGACCGTTGCCTCCACCCATGATTTTGCTTGATCGGAGAGGTCGGAAAGAAAACCCTAGAAG  
AGCTCTTTTTGTTTCAGCGCTAAAACGTGGCGGGGAATGGCAG

>TCONS\_00016691

CACACACTCTCACCATCGCCTCTCTCTATCTCCCTATAATACTCACACTTATATTAACGGGTTGCAGATCGAAG  
TTTCTGGCAGATCCGATTCAATTCTATATTCCTTCTTTCTTTGGGAGGGGGAACGGTTTGAGACAATTTTCAGTA  
TGTTTCGGGGAATGAATGGATGTTATGATGCCAATGTTGGTCCTAGGAAATTGAAAACCTTTGTAATGAGATGT  
TTTAAATTATATTGGTAACTAGCCCATATTGTAGTATTGTACTTAAAAAGAAGAAAAGTTGATGATAGCATAT  
AGGAGTATCTCACTTAGGTTGTCTGTACACACAAATCACGATGCATCATCTGTCATTGCGGTATTTATTTATGT  
TCCATTTTTGTTACTTGTTGTAACCACCCTTCTACATGAGATCACGATGCATCACCTGTCATTGCGGTATTTACT  
TATGTTCTATTTTTGTTACATGTTGTAACCACCCTTGACGTGGGACATCACTCTATGGTTAATGAAGTTACTCT  
CCGGTGATATACATATATAGAAATTGTTAAGTGAAACTGTCTATATATGCTTTTTGTTCCCCACATTTCAAAT  
CTAATTGATCTGAGCATCGG

>TCONS\_00016789

AGGAAATATGGAAAGGGTCAAAGGGACTGTCAGCATGACTTTTCTTCCATACGTGTCCGACAGATTCCCCAA  
CACTGGCATTATAATCAGTGATCCCAATCCTATTATCGCATGTTGAAATCCAGTGAGATATATAGCGAGGGAG  
CATTCATCTTTTCCAGGACAAATGGCAGACATGGTGATATCAGTAATGGCAGGAATCACCATGAATGCAGAG  
AAGCAGTGAAGAAACACTGTCATGAATATGTGGCTCAACCCACTACTAGACAACCTTTTCCATACCTTCAAATT  
CTCTTGCCTACTTCTTTC

>TCONS\_00016828

AGAGATTGATCTTAATGAGAATGGACTCTGAAGCCCAGAATGAATATCAGACTTCCTCTTCAGATAGCCAT  
GAGATCACCATACTGGCGCATCAAAATGATGGAACCAGCAAAGAGAGCTGAAGCTCGAAGCAGTTTCATGT  
TGAGGTTCCACTTTTCTTCGTCATGAACCTGAGAGTGCCAGAAAGCTTTGATCTTGTCCACTGATATCACAGA  
GTCCGCCATTGAAGCTCGTCTAGAGTGGA

>TCONS\_00016836

ACTCAACCATGCATTAAATTGTTACAGGCAAAAATCTGTTTCATATAGTAAGTTGAATCCCACAATTAGGACAC  
ACTCAATTGAAGTTTCTTTGGATGAGATATACCTTAAATGCATGTACACTGTTGTTCATTCCTTCTTTTTCCCCCT  
CAGAGACTAAGCTTATAGAATTCAACCAGATCAGAAAAATCGTTTATAAGCTCAAACCTATTTTTAAGTTCTT  
GGATCCAAAATCTCGAAGCTGACTGATTAAGCAGCTGCTGTTTCCTCCTTTTTGGCAAGCTGGTTTTGAATGTG  
TTGGGGAACAACATCAAAGTTGGCTAATTGCATGACATATGACGCACGGCCTTTTGTTCATTCCTCGCAACGTA  
CTAACATAATTGAACATTTCTGCTAATGGAACATAAGCATCAAC

>TCONS\_00016997

TTATTAACCTCCAATTTTCATCAGAAGCAGACCTTGGGAGCTTTTCATGAAGGTGAAGAGTTTCTGAGGTGGTCAT  
GCTGCTGGCCGAGGCGGAGGGTGCAGTGAAGAAGAAAAGGAAACCTAGAAGAGGGGAAGACTTCAAGTTC  
GTGAAGCTGTTGTTAAAGCTGACTTCTGACTTCTGTGGGTAGTATACTTCCTTGGTGTGGGTCTGGTGTAAC  
GTTCTAAATAATTTAGCACAGATTGGAGTTGCACTTGGTGTAATGACACAACGATATTGCTGAGTTTTTTCA  
GCTTTTGCAATTTCTCTTGGGCCGTCTTGGGCAGGTGTTGTTTCTGAACACTTCGTGCGGTCAAAAACAATTCC  
ACGGACATTTTGGAAGATGGTAACACAAATCATCATGATTGTAACATTCCTTCTGTATGCTTCAGCTCTGAGT  
GGTACTCTCTATGCTGCCACTGCATTGCTAGGAATTTGCCTCGGTGTTCAAGTTTG

>TCONS\_00017034

ATGTGTACAAATCATCAATATTCTTTGAGAATTTTGGCAGTCTCGATAATGAAACGGCCTTCCTTGTACTTTTG  
GGAAGGATTATAAGCTTTAAACATATTTCCAACCCAACTCCTCACCACACTTGCTGCAGAATATATCAGCAACG  
CTAAAGTAACCCGTCATTAGTTGTCTATCTTCCTTTTTTCCCACCACTACATTCATTGCATGCTTGAAAAGGAA



TGCTCCTCCCGATTTTGGCCACAAAACGTTTAGAGAGAAGATCATCTCGAAGAGCAATCGGATTCCGGCAACT  
CCTGCAGCTAAACAAAGGGTGGCTGTAGGAAGAGTCCGCCATATTAATTAGTAGTTGAACAAAACGATGATG  
AGTTTAGTA

>TCONS\_00017239

ACACCCTGAAAGTATCCACCAAATAATTAGTAACCTAAGGCCACTAACGGAAAACCTGGGAAGACACTAGG  
GCAATCTATTTCAGAAGAGAGAAGAACTTCACATAATAAGAAAACAGCTGCAACCGCTTCCGGACTTTTTACCAT  
TATTTTTGTCATCGTTTGAAGAAACCAACCAACAATTCTCAATTCCTTCAGTTAAAGAAAAACCAAGCCACAA  
GAACCACATATTTAAACAAATAACTGCCACCCG

>TCONS\_00017291

GAAGAGGGTCTTCCAACAACTCAGTGGGGGTATGCGTCTCCGTACTTTGCTTCATTTTGAGCTCCTCTTCATAT  
TTCTTCAATCTCTCGTTCCACATTCCTTGTACTTGAGTTCAGCACGATGCATAGCATAGAATCCAAGTATGCC  
TCCGAAAATGGTTCCTGTTATTATTCGAACATAACCCCATCTCGGCGATCTCATCGGCGTCGTCATTGATTCTA  
GTCTCCTTCTCTCCCTTTGTTCCGCGAATCCTA

>TCONS\_00017365

CTATTACAGAGACCTGAAAGGGAACCTCGAAAAACCAAGGATTATGTAGCAACTAAATCAGGAGTTTCAGCC  
TCCACAGATAACAAAGCCGTGTGTAATTTATCCACCCAATTGTCTAGCCGATCCCTCAATGACTTGATTGGG  
GAATTCCCAAACTCTTGTTGCACCCAGGAAACATGAACTGTCCCTTCGACTTGATCAATTATCCCTCAAT  
GAGATGCACAGAAAGGCTCTTCATGAGTAGATATTCTACATCCTCCACATTTAACTTTGTGCGCTCTGCAATC  
ACACTCAGAGGAATAGTTCTATCGTCTGCTGGGCGACTGAAGATAATTTCCATCAAGCAGAGAATGTTGACC  
TTCTCGAGAAGCTTTTTCTCATTTCTGCACCAATGCTGGTTGAGCACTCAAAGCAGCTTGATGGACATGGCATA  
TTTGTGTTGATCGAACCAAAATCACCGGTGTTAAAGGCTTCAAGAATATAATAGAGCCACTCAACCTTAGTCCC  
TACCAGACTCTGTATAATCGGATGAGCAAGTAGTTCTCCAAAGTTGTATATGTTGTCTCCCAGCAATGCTGAC  
AGGGACAAATCGAAAGCCAAATCCTAAACAAAATAGAAGAAACAATAACAGTTTTTCAGATGCATTATAATT  
AAAAGACTGAAATTGCAGAAA

>TCONS\_00017486

TCCATACGCAACAAGATCAGCTCGGTCTTCAACCACAGCTTCGTTTCCATCTCCTCTATCATAACCACCAGCT  
ACCATAAAAGTACCTTTGAATGCCTTCCTCATTGGTACAAGGCTTTCAGTACATTCAGTTTTCTCTCCAACTGT  
TTTCATCCTCGGCTCAACCATGTGGCAGTAAGCAATGCCATACTTATTCAAGGATTTCGGCCATGTAAAGTCCC  
AAAGCACTTGGGTTTGAGTCTCCTGATTCCATGTAGCTTGCAAATGGGGAAAGCCGTATTCCAACCTCTGTCAG  
CTCCTATCTCATTTACAACCTGCTTCAACTATTTCTGTGTGCGAATCTGCAACGGTTCTCTAAAGACCCTCCATAA  
TGGTCCGTTTCGATCATTGATTGGTCTTTTCATAAAATTGGTCGATTAGATAGCCATGAGCTCCATGGATCTCAAC  
CCCATCAAATCCTACAAACATAAGTGAAGTTAGCTTGAGGGAGGATGTTAATTTGGCGGCAATACCAACGTG  
ACAGCACATGGACAGATATTCAAAGCAAG

>TCONS\_00017487

CTAGAAATGGATAGTCAGTATAACCAACAACAGGATCAGATGTATAGAATGTCTCCCTGTTATACTTGTTGAG  
AGGTGCATCGAGCTCAAATCGCCTAGGTAAATCTGGATTGGCTAAGAATAGACGTCCATATGCAACAAGATC  
AGCTCGGTCTTCAACCACAGCTTTGTTTCCATCTCCTCTATCATAACCACCAGCTACCATAAACGTACCTTTGA  
ATGCCTTCCTCATTGGTACAAGGCTTTCAGGACATTCAACTTTTTCCCAACTGTTTTTCATCCTTGGCTCAACCA  
TGTGGCAGTAAGCAATGCCATACTTATTCAAGGATTTCGGCCATGTAAAGTCCCAAGCACTTGGGTTTGAGTC  
TCCTGATTCCATGTAGCTTGCAAATGGGGAAAGCCGTATTCCAACCTCTGTCAGCTCCTATCTCATTTACAACCTG  
CTTCAACTATTTCTGTGTGCGAATCTGCAACGGTTCTCTAAAGACCCTCCATAATGGTCCGTTTCGATCATTGATT  
TGGTCTTTTCATAAAATTGGTCGATTAGATAGCCATGAGCTCCATGGATCTCAACCCCATCAAATCCTACAAACA

TAAGTGAAGTTAGCTTGAGGGAGGATGTTAATTTGGCGGCAATACCAACGTGACAGCACATGGACAGATATT  
CAAAGCAAG

>TCONS\_00017488

TTCTAGAAATGGATAGTCAGTATAACCAACAACAGGATCAGATGTATAGAATGTCTCCCTGTTATACTTGTTG  
AGAGGTGCATCGAGCTCAAATCGCCTAGGTAAATCTGGATTAGCTAAGAATACACGTCCATACGCAACAAG  
ATCAGCTCGGTCTTCAACCACAGCTTCGTTTCCATCTCCTCTATCATAACCACCAGCTACCATAAAAGTACCTT  
TGAATGCCTTCCTCATTGGTACAAGGCTTTCAGGACATTCAACTTTTTCCCAACTGTTTTTCATCCTTGGCTCAA  
CCATGTGGCAGTAAGCAATGCCATACTTATTCAAGGATTTCGGCCATGTAAAGTCCCAAAGCACTTGGGTTTGA  
GTCTCCTGATTCCATGTAGCTTGCAAATGGGGAAAGCCGTATTCCAACCTCTGTCAGCTCCTATCTCATTTACAA  
CTGCTTCAACTATTTTCGTGTGCGAATCTGCAACGGTTCTCTAAAGACCCTCCATAATGGTCCGTTTCGATCATTG  
ATTTGGTCTTTCATAAATTGGTCGATTAGATAGCCATGAGCTCCATGGATCTCAACCCCATCAAATCCTACAA  
ACATAAGTGAAGTTAGCTTGAGGGAGGATGTTAATTTGGCGGCAATACCAACGTGACAGCACATGGACAGAT  
ATTCAAAGCAAG

>TCONS\_00017520

TATCTTCAAAAGAACTGGGCAGTGGTAAGGAACCAAAATCGATAGCATCATCTTCATCAACTAGAGCGTTG  
ATAAAAGATAGGACCAGACTGACAAGCACTAGAACAAGAGGACCAAGTAGAAACCCAGCTTGAATATCC  
GAATCTTCTTCTCAGACTCAATGAACCTAAAACTTCAGTCACATCAATAAGATGCTGCCGG

>TCONS\_00017639

ACCTTGTTAATCACAAGAACAATAGGAATACGTTCTTGAATCGCATGCCGAATGGCCCGTTCTGTATTTACCA  
TCACTCCTTCAACAGCATCAACAATCAAACTGCACCATCAGAAAGTCTCAAAGCAGCTGTCATCTCATCCG  
AGAAGTTGACATGACCAGGAGCATCCATAATGTTGCAGAGGTAAGACTTTGAATTGCTGTCTTCCAGGACGA  
GTGACATAGGGACAGACTTAATTGATATCCTCCTTTCTTGCTCATCTATTCTTGTGTCTGTATACCTCATATGCT  
TCTCACTATTCTGATCAAAAGTAGATATATGGTGGGTTTGCTCCACCAGCATATCCATAAACAAGTCATCCC  
GTGATACACGTGTCCCACTAAAGCAACATTTTCGAACCAATGCTGGGTTCAACATCAGACCTAAGAGAAATTG  
AGTCGAAACATAGGTGGACGAATCCTTTACCCCAAGTTCAAACCTTGAGATTCTTCACCGGTTTAATTATCGGC  
ATTTCAAGAGGCTGTTTCATCTTCATCCATCACCAATGTCTCGACCTCTTCACCGTAAACCTCTTCGGCTGTTGG  
GTAGTATTTCTTGTCTTCAGCAAGGACAACCTTGGTTATCCATGTCAACATCCTCTTGAGTGGCCAGCCATCCAT  
TCGATGCACCAGGTTGCTCGCCATCAGATGCAGCCCTCTCATCATCACTTCTCTCAGGGAGCTCCTCATCTTCC  
TCTTCCCTATCACTTTCCTGATCAGACTCAATTTTCAGGACCGATATAGTTCCCAAATTCATCGTATAAACTTTC  
ATCCATGGATCTTTACTACCTGATTAGAAGAAAAAATCACCCATCTTATTAATTGTCCAACCTAAAGCAAACAA  
AAAATCAACGGAAAAAAAACAATTTTCACCAAAAACAAGCTATGCAATGGAGCATTTATGCACAGGTGAAAC  
TTAG

>TCONS\_00017641

CTGAGTCCTCTTGAGAACTAGTAATAATTAATTTATTACATTTTCGCGTAGTAAACAAGTTATCTAGCAGTG  
AATTTTCATATAATCTTCAATCTTTAGCTTACATAGTGGTTACATAGTTAACCAAATATGAGACTCTCATCCTG  
TAAAACTGGGATCAAATGTTACAAAACCTCACCTAAAATAAAAAAGGAACTTCTGGCAAAGCTAAAATGAGT  
TCAACCTTTAGGCTATATAGAATCCAAAGAACGTGCTAAAAGAGGATAAAGTAAGAACTTGAACAAGTGCC  
CAGTAATTCAATACGCCTGAGCCAACAGAAATCTCATACTTAATGCCAGTCGTGCGAGAATCTACCCTTTGAT  
GGAGAGGAAATCACCAACAGATACTCGAATGTTAGAGTAAGGGATTATCCCAACAAATAGATGAGCTCAAAG  
GGAGAGTTACGCAGGAACTATTTCATGCTCCTGGTATGCCAAATTTGTACTAGACTATTACATATTTCAAGAGG  
CTGTGCGGTACAATATCTTTCAAGAGGCTGTGCGGTACATAACATACAAAACCACCTCAGCTATGTGATATCT  
ACATCATCTGCAGGTGAAGATCAGCATCCTGCTGCGCAAGCTCCACCATCATAGCCTCATCAAAGAATTTGTT

GATGCTCACATCTTCACTCATTCCCTTTCTACGCCTTGTCTTCACCATGAACTCACGAGCCAGATGCTGAATTG  
GGGCAGGCTCTAGTGGTCGTAAAACGATGCTCTTGTCAAGAGGATCTCCAGGAACAATAGCCCAATGATCAA  
AAACTGAAAGACAAAACGCCTGCCCTTGGGTGTGATACCTCAAGTCGGTTTCGAAACCAAAGGACTCGATAA  
CAGGTAAAAATGCCTTGACGATGTAGGCAGGGGTCCCAGGTTGAGGAACATCAGCAGTAACATGTCCACGC  
CTGCGAGACAACACGGTGTATGTAGCAGAGAGGCAATCCATGGGTGTTTGGATCTCCACATAATACACAGGT  
TCCATAAGCCTGGGTGTCGCCATAAGGAAAGAAGAGTAGGCTACACGTCGTGCAGTTGGAATAATCTGACCT  
GTT

>TCONS\_00017648

AAAGACTATAACAAAATTTAGGACAGTATAATACTCAAACCAGATCCATATGGAATTCAAAAATGTGCCCTT  
TCAACGCAACCTTCTAGCCTCTCTCTCAGACTCCAACAATGTCAAAACATCACCTCTCTGACAGGCCCCTTG  
ACGTTTCTCATGATAAACCTGTTCTGGTCATCAAGAACTTGACTCTCACCTGAGTTACCTGTCCTCTGGATCC  
AGTACGACCCATCACTTTCACCACAATAGCATGCTTTGTGGCAGATTCCATCCTTGATAGGAGCAGACGAGC  
GAGCACAAGGGCAAATTGCTACGACGGCCGAAGAGGAGAAAAAATGCCT

>TCONS\_00017753

CTTTTCTTCCATACGTGTCCGACAGATTCCCCAACACTGGCATTATAATCAGTGATCCCAATCCTATTATCGCA  
TGTTGAAATCCAGTGAGATATATAGCGAGGGAGCATTTCATCTTTTCCAGGACAAATGGCAGACATGGTGATA  
TCAGTAATGGCAGGAATCACCATGAATGCAGAGAAGCAGTGAAGAAACACTGTCATGAATATGTGGCTCAA  
CCCACTACTAGACAACCTTTTCCATACCTTCAAATTCTCTTGCCTACTTCTTTC

>TCONS\_00017755

GAGGTGATCTTATCATGAAGCTCTCAATGAAGGCTAGCAATAAAGCAAAGGCAGCACATGCTAGACCAAAT  
CCTGGGAAATGAAAGGGTGCACGTTCTGATAGAAATAAAGCTGTTAAAGGACTAAAAATTAATGGGGAAAC  
TACGGTCGCAAAGGAACATATGCCTGTGATGCATCCTTGAACCTTTCCCTGCTCATTTGGCCCAACCTGCTTG  
GAGGCCATGCTCTTCAAACATGGCATCGAAAAATAGACATAATAGAGATCAAAGCGCTAGCATAAGGGAC  
CCATGAGGACCAAGCAATGCTATAAAGTAACATATGAACACAACCTGAAAAAGAGTCCAACAGAGAGCAGC  
TTCTCCTCTCCAAGAGCAGGAACCTAATATGGGCATGAGAAGAAGCTGTGATATGGATCCTGCAATCCCAGAA  
ATTATAAGCAAATCAGCAAATTGGTCTTTGTTGAAGTGAACTGGGCCTTCAAG

>TCONS\_00017808

TTTCTTGTGATTTTCTATTCTTATGAGAAATGGTTTGCTTCGTTTGAGCCGTCGTCGCTTAATGCATGTAGGG  
GGGCTGGGGCTTTTCCCCACGACCCCTTTTAAAGGAGAACCAGAAGAACAACAATGAACTCAAAGCTAATG  
AAGGAGATCCGCAACTTGAACAAGGTACACGGGATCTTTCCTACCCCTTTCTATTTGACTTCTTTGAAAGGT  
GAAAGAGTAAGAAGCTAGACCGACTTG

>TCONS\_00017863

TAGCCTCAAATCTTTCCGGCACCGTTACAAGGATTTTCTCAACGATCCTTGAATCGTTTAAAGTGGAACCCAA  
CAATCTGACACGATTTGCTATGTTAAGAAGTCTGTCAGAATACTCCTTTATGGTTTCACTGTCTTTCATCCTTTG  
CAACTCAAATTCACGCACCAAATTCAGCACTTGCATTCCTCGAACTTTTTCATCTCCTTCATATTCAGTCTTGA  
GATAATCCCATACCTCTTTTGCTGACATCAGAGACATGATACGAGTGAAGATGGTGGATGAACTGCAGCAA  
ACAAGCATGCCTTTGCCTTTGACTTTCTGGTTTTCTCCTTGTAAATTTTGTATCTGAGCCATCGTGGGATTGTT  
TGGCAAGGGAGCAATCTCGTAATCATCTTCAACAGCCTCCCAAAGATCCAACGCTTCCAAATAGGTCTGCAT  
TCTAACTACCCAGATCTGATAACTTTCTCCATCAAAGGTTGGTGGTGCGATCGAAGAAAAGCTTGTTTCTCCG  
TCCATGGTGTCCACAGAATCTGCTTGCCTCAGACAGGCCCCCTCAAGAAAAAGAGCTCTGATACCAATTGTTG  
TTAACTTTAATCAACAAACCAGAAAAACAAGTGAATGTTTGTGATTAATGAAAGAGCAGAATATTAAAGGAAT  
GAAGAACAGAGAAGAAATCTGAAAAGAGAGAGCATAAGACTAATACAGAACAAGG

>TCONS\_00018244

ATCAAATCGGAGAAGCCGTCAAAAGGAATTGGAGATTCAACTCCTTATAGATTTCATCCAGTCGAGTTTGAGC  
CTTCCGTTCCCAGAGCAGAAAGCCAAGTATTATAGAGAGCTGGACACTGCTGCTGATGTTGTCAAGCGAGCT  
TGTCGTCTATGAGTTGATGTAATTTCTCCACTCATTGTAAATAATTAGCTAATTACTCCTTCGCTTCCGTTTATA  
TGACTGCATTTTCATGAGTAGACTCAACTTTAACATGTTAATTTGACTTATATGTTAGATTACTGTTAGTGAAAG  
GGTTTGACACGAAGTTTAAAATTTTATTTTGACTTATTTACTACTATGTTGATGAAAGTAGACGAAAATATTG  
AAGTGAAGATAATTCTAA

>TCONS\_00018363

CACAAATTGGCCTCTTAAAACCCGAACCCTAGAGTTAAAACCCCTAACCCCTAAAAGTATATCTGCTACAGTC  
GCTCTCCCACTCTAGACGAGCTTCAATGGCGGACTCTGTGATATCAGTGGACAAGATCAAAGCTTTCTGGCAC  
TCTCAGGTTTCATGACGAAGAAAAGTGGAACCTCAACATGAAACTGCTTCGAGCTTCAGCTCTCTTTGCTGGTT  
CCATCATTTTGATGCGCCAGTATGGTGATCTCATGGCTATCTGAAGAGGAAGTCTGATATTCATTCTGGGCTTC  
AGAGTCCATTCTCATTAAGAT

>TCONS\_00018428

GGCTAACGTGGTCGCTCCGGAGCTTTATGCAACATTGGTGTCAACTCCGAATCTCCATCATCGTTCTCATTATA  
GTCGTCTTCTTCCAATTCTTCATTGTGACGAAGTTCTGCAATTTTTCTCCGCATATGCCGACGCCATGCAGCTTG  
TATAAAGCTGGCAGCCCACGTTCTCCATTGCTGCGAGTAAAATCTGAAAGTGCTGTACCTGTGCGACTCTGC  
AGCCGTCTGAACTGAGATGTAATGTACTTCACTTCCTCTGCTTCTAAGGCAAATGCCTCTACTTCTGTTAGTGC  
CTTTACAGTCCTAGTGGATGGCGGCAAGTTTGAACCGGATTTAGGATCCAATGCCCATGTCAGCAGTTCCTCC  
CCGCAGAAGTCATTTTCTTTCAGAATACCTCTGTTGAAGAAACCACTTCTTCCACCATCAGTTGTTACACTCTC  
TAGGTGACCACGGATTATAAACAGCATTTACCAACCGGGTCTCCTTCCCTAACTATGTACGTATTTTCTGTGC  
ATAAACTTGGTTTCAACCGCTCACAGATTGCGTCAAGTAACCTCTCGTCCATGTTCTCAAACAAGGGCACCTG  
CATGTTTCCAATGAGAAGAGCAAATAGTAGGAGTCCGGAAATGGCCAATATTATTGAAAAGAGATTTTCTAG  
AGTATAGGTACTGTTTTCAAG

>TCONS\_00018537

TGAACACCGAGGCAAATTCCTAGCAATGCAGTGGCAGCATAGAGAGTACCACTCAGAGCTGAAGCATACAG  
AAGGAATGTTACAATCATGATGATTTGTGTTACCATCTTCCAAAATGTCCGTGGAATTGTTTTGACCGCACGA  
AGTGTTCAGAAACAACACCTGCCCAAGACGGCCCAAGAGAAATTGCAAAAGCTGAAAAAACTCAGCAATAT  
CGTTGTGTCATTTACACCAAGTGCAACTCCAATCTGTGCTAAATTATTTAGAACAGTTACACCAGACCCAAACA  
CCAAGGAAGTATACTACCCACAGAAGTCAGAAGTCAGCTTTAACAACAGCTTCACGAACTTGAAGTCTTCCC  
CTCTTCTAGGTTTCCTTTTCTT

>TCONS\_00018546

GCAGATTCCTTTGTATGTGCTCCATCAAGTAGTATAGTTGCCCCAGGTACTCCAAGTAAATTAGCTTCTTCTGA  
AGACAATATTTGGCTTCTGCCTTGCAAAAACGCACTCTCCAGACCAGCACGAATAGATCCACTGGACAAACT  
CCATCCTTGCTTATTAAGGCACAAGGCTGAACATGTAGCTGTTACAGCATTTTGAAGTTGGTGAGCTCCAAGC  
ATGCGTAATTTACACCTAGAAGTTCAATCGACAGATCAAAGTCCTTCACAATCTGGAGCACTATATCACAC  
AATTGGCGAGGTATACCACTCACGTCACAGAAGCCTCTCAAAGCGCTTCTGTTTCCAGGATCAGATGCTGATA  
CCACTGGTGAAGACATAGAAAATGCTTTCCACGAAGAATGCGCTCAATATATGGAATGAATGGACCTCCTA  
GAACAAGCTAACTGGGCGCCCATGTTTAACTATTCTGATTTTGCCACCGCTATACTTTCCAAAGAGCCTCCA  
AGTGCTTCCAGATGTTCTCACCAACAGTAGTTATGATTGATAAAGCAAGATCAGAAGCTGAAATAACATTA  
GTGGCATCTCGTGCTCCGCCAATCCAGCCTCCACAACCTGCAATTTCCGTATTCTCTTCAGCAAATAGGCTGA  
ATGCTATAGCAGTCAAAACCTCAAAATGACTGAGACATCCATTCTCAAGTTTCACTGCCCTCTCAAGAACCTC

CCTCCTCCTCTTGAAATGATGATTCAACGCCTTGGCTGATATTGGCTCGCCCCATCTTCCCAACGTTATGCGTT  
CCCTAATAGTCTGTATATGCGGACTAGTATAGCAACCAACAGAATAGCCTTCTGCCCCGAATATACTGGATA  
GGAATGCAGCAGTTGATCCTTTTCTTTTGTTCAGCAATATGAACAGTCTTGAACCTAGATTGGGGATTACCG  
AGGAGCCCCACCAAGCGACTCATTCTACCTAGATCGAAACCATATTCGGAATCTGTGCCAGCGCCTATTGGA  
ACCCCTGACTTCTCGAAGTTGTTTCTGATTGTTCAAAAATTCCATTAGTTCGCCTAGTTCTGGCTCCTCTCGCAA  
AGTGGAAAAGCCATGACGGGTATTCTGGACAAGTCCAGCAGCTGAGGAGAACATACTTCTCTGAAATGAAC  
GACGGAGAATGCTAACATTTTTCATTTTCTTATTCTCACACTACACTGAAGAAACCATCGGCGGTTCTGCT

>TCONS\_00018553

AACATTTCTGAGACTATGTACGTCTTAAGAGACCTTAGTGAAATCACTACTAGGCTGGCTATACTACAAAAAT  
AGAAACTAAGGTGGAAAGTAATGACTGCCCAAGGTAAACTATCTCGGCCAGTACAAGTAGGACAAAGGAT  
GAGCATAGCTGCAGGAGGCCGGTCTGTCATACACTGCTGCATTGCCAAGCCATCCATATAGCTGACCAGTAT  
GACTCCCTATTTGCCCCGGTGTACTATAAACTCTTCTCTGTTGTAGCCATGGATTGGAACATGTGAAAGTTCT  
GAAGGATCAATATCATGAAGTTCCAAACATTTGATGACAGATCTCAGATCAAACAAGTGCCTCCTTTTTGCTT  
GAT

>TCONS\_00018648

GACTTCACAAGCTAATGGAGTACCTTTATTTAGTGTATTTTTCTTCAAAAAAATCCTAATAGCAATCTACTCA  
ATTGAAAATTCATACAGCATGTTGTGAATGTACTTGTACCAGGCTGAACAATAACAGAGGGGAAGTTTGGT  
GTGTTACAGCATTTGGAAACCCTTGTGTCTCTAAACAGACTCCTGCATGCTTGTTATACACAGCTCCACCTTT  
ACCGACAACCTCCATTACATAGTTTGCAGTGTAAACTGCATGCCAGGAGCATTGGTCCATAAATTGAGAAC  
TCTGGAGCTCTTAGGATCCTTGATTTTGCAGCATGCTTCAAGCCGTCTTTCACGTCTCCACAGTCGAGCACGT  
AATTATGGTCATACCCTAAGCCAACCTTGCTCGATATCACGACCGATCTGCTTTTCAGAGGTGAAATCAAATGG  
AGTGCCTTTCACAGGCATTATTTCTCCGGTTGGGATTATGTTCTGATCAACGGGAGTAATATGATTTGCCATA  
TCTGGGCTGTGTTATCAAGAATATCTCCAGAATTATGGCCACCAAGGTTCCAATAGGTGTGCTGTGCTAAACT  
AACAGGAGTAGGCTTATTTGCAGGCACAGCTTCCATGTCAAGTCTGAGTGTGCTCTTAGAGGTAAAGTGTGTAA  
GTTGCGGTCACAGAAAGATCACCTGGGTAACCTTCTTCTTCATCACGACTATGATACTTAAAGGTAATTGATG  
GATGTTTCGCCCTCCTTGTGTTTCTGCAACCTCCACACAACCTTGTCAAAACCTTTATGCCACCATGGAGGCT  
GTTTGGTGGCTTATTGATGGGTAAAGTGAATCAACTCCATTCAGAGAGAACTTTCCTTCTTTAATCCTATTG  
CCACTCGACCCACAATGCAACCAAAGAACGGAGCTAAACCTTTCTGG

>TCONS\_00018662

TAGGTGCCAATATGAGGACCAGTGGTTGAAACAGGTGGACCATAAGAGTATCTCCACTCTCCACAAGCTAAG  
CACCGGTCAACCTCGTGGCTATTATGCAGCGTGCAAACTTACAAGACCAGACTTTTGCTGCATTTGCTTCAT  
TTCCTCTATCCTTTGGGGTTCCACAAGCTCCGCATAGAAGCGCTAGCGGCTGATTCAATAAAGTACACGTACA  
ACATTCCCACATTATCTGAGGATCGGTTTCTAGAACTGAAATATGATCAGGCTTTGGTCTCTACTGAAGTTTTA  
GAGCTTTCAGAGGGTCCCTCGCTCTCTACCATTTTGGAGCCGCACCACAGATCATCGTGTAACCTCCTTTCTGC  
AGCCATAGCGGCAGCCTGAATTGGGGTGAGTGCAGCCTTGATGCTACTATACCCCCCAGACGCTTAGGCCC  
CGATGGCAAAAGTGCTCCAACCTCGTGATCTATTTTCTGCAGCAGCCAGTGCTTTCTGCCGCAATGATGACAAT  
GGAGGTTGTGAGAAAAACCCGCCCAATCGCTTTCCGGGGAGATCAAATCCTTGTCAGTACACAACCTTCCT  
GATTTCTGTCGAATAGGTTATAAAAATCAGCATTATGCGGGCCATATTCATTGTGGCAGAGTTTATGAAGCATG  
GTGTGAAGAATTTGAGTATAAGGGAAGAAGTCCAACCTCATTGTTTGGTCGCCGCAATCTAAGCTTAACCTCTG  
CACCTCCTCCTATGTTGAGTCCTAAAAGTGATGGATTGGCAGGACAAAATTCAGAGAGCAACTTGACTTTCCA  
TTTCCGTTTGCGCATTATAGGTTGCACTTGCTTCGCTACCTTTTCAAGAATTTCTTTCCTCATCATCACGCAC

CTTCTTCAAAGGTTTGACTTCCCAGACCTTGTTTCAGATCATTAAAGATCCATGTGGCTGGTGGAAAACCAAAAC  
CAAGCTGA

>TCONS\_00018831

GTTAGGATTTCGCGGAACAAAGGGAAGAGAAGGAGACTAGAATCAATGACGACGCCGATGAGATCGCCGAG  
ATGGGGTTATGTTTGAATAATAACAGGAACCATTTTCGGAGGCATACTTGGATTCTATGCTATGCATCGTGCT  
GAACTCAAGAAATGTGGAACGAGAGATTGAAGAAATATGAAGAGGAGCTCAAAATGAAGCAAAGTACGGA  
GACGCATACCCCCACTGAGTTGT

>TCONS\_00018860

AATTCTATTGATATACAATTTGATGCCACTACAACCTCACCTCAGTATAAGCTTGTCCCAATCCTGAAAACCAG  
CATTCATCAAATTTCTCCACTGTAAACAATTCTGTGTCTTTCACTACGCCAGTAAGCAAGAACTTTGAATCCT  
AGCCTCATAACATCTTGATAAACTTCAAACCTTGACCCAATGGCTGGTGTCACTCCCTTCTCAACCCATTTCATC  
AAATTTCACTATCAAATACCTCCAACCCATAACCATGTTGCGAATAATAGGGAAGATTGAAAGCAAAGT  
CTCATCAACATCAAAATCCCACACATCTTTTCCATCTGCGCCCAATTTTCATGCTTTCTGCATACGCTCCAGCTT  
CACTTGAAACTCTATCAATGTCCAACCTTATAAGCCCCGCCGTTAATATATTGCCTCACGTAATCAGCACATTC  
CTTTGGAATAGTCTTCCATGGGCTCAAATTATTAGCCTCCACAGCAAACCTCCAACCTGTACACTCTAATTCA  
ACATCAGTAATTGTTTCCTTCAATTGGGGTT

>TCONS\_00018866

CAAAAACCTGGATCCTCTGCCAACAAAAGGGGTGTGTCTAGGTGACGAATTTGAAACATCCAAGTCCAGCAG  
CTAGATGACCAGCAAAGCCCATGGCAAGTCTGGTTTCAACCATACCACCAATCATTAAATTTAAGCCCATGG  
ACCTCGCCAAGTCAATAATTTCCAGAGCCCCAAGCACCCCCACTTTGGCAAGCTTAATATTAATGACATCAG  
CAAGACTTTCTTGCACTATCTTTTTAGCATCAGCCAACTTCGACAGCTTTCATCAGCAGCAACAGATACCCC  
ATATTTATCCTTTGCGATCTGACTAACATGTCCAAGACCTTCCCAATTGTC

>TCONS\_00019035

TATGACTTTTCTTTTCGATGCTTGACTTGCTCAAAACAATAACTCCGAGAACAATCAGTGCAGCACCTGCAAA  
CCACTGAATTGGTAGTGGCTCCTGGAAAAGTAAAAATCCAGCCAATCCAGATGATAAAAAGTTGGTTGCAAA  
GTTTGTACAGTAGCTTGTAGAGATGATAGAGCTTTAAGGCTATTGACATAGCATCCCCACATTGTGACATTG  
AATATTACGACACAACCATATTTGATGAGCTGGGAGGAGAAGAATTTGGCAGAGATGGCAGCAAGAGCAGC  
GTTGAATCCAGCTGCGACTGCCCACACATAGCC

>TCONS\_00019247

GGATTTACTTGTCTATATATTGTTCCATTTCGATCTTTTAGGTCCCGACTTCACCTCGATGGTTAGGCCACCACGC  
CCTTAAAGTCTATACGCGATAGATAGACTCCTAGAACCATGACATATTTGCTTACTTGAACATAATTTCTTTCC  
ACGAAAAGAAAGGAAATGGTTCATTCCACAAAATAAAAAGCTTTTTTTACGAGGTACAAATAGAAATTCCTC  
TTTATTTGATTTGTTACGAAATCGACCATAGATCAA

>TCONS\_00019264

CAAAATCGAAACGCCAACCATCAAATCCAATTTTCAGTTTTTAGCCAATTCATCCAGTCTGATAACTCTTTTTG  
GACTTGAGGGTTAAGATGATCGATATCAGGTGCAGCTGCAAAGTCTAAACCGGTGTCATCATTCCCCGTGCC  
ATCAGAATATTGCGTGTGCTTTTGCAAATCATATGCGGACCCCCAATCAAGACGATCATCAGACGTTCCGCCT  
TCAAAGATGCAGTATATCCCCTGCTATCTTGCTTATCGGCACATCTGTGGTTTATTACTATATCAGCAACAGC  
TTTTATTCCCTTGAGGTGAACTGAGTTAGATGATGGTGGTAACCAAACATGAGTAACTCCAGCTTTTGCCAA  
ATCTGGAATAAATTGATAAGAGAGTTGTACCATCCACCTTGCTGATTACTTGATTCCCAATTGAACCCCTAA  
AATTCATTACAAAAAAGAAACAAATGAACA

>TCONS\_00019265

AAATAAAGATAGAGGCTGCATTTGATATGGATCTTTTGATATGGATCTATAGATCAATCTACAATATTATCTT  
 GATATATGTGAATATCAATTCCATATATGGGCTTGACATAGCATCCAATTCATTTATTTGCTATATCTATTGT  
 TCTGATCAATCTGAATTACTCTTATGTCTTATAGTTTGAATTACTAGATTTTTGATTTCCAATCTGAATCTCGGT  
 ATCTATTGAAAGAATCAAATCAATGAAGGAAAAGCAATAGATATAGGCAGATTCAGAAAATCAGGTAGTAA  
 TCTTTTTTTTTTAACATTCCCAAGAAGTAATTGAGTAAACCATTGACAGTAGTTCCACGGGTATCGAAAAGGAA  
 GAGTAAACCTCACCGATTTTTAACGCCTGAACCATGATATGAAATAAGTCGATAAAGCATAAAATCCAATTTC  
 AAAAATTCGAAAGCGGTAAATGCGCAATATGTGACTCACCTGAAGATCTTATTCTGCATAGTATCTCGTTAGA  
 CAACCACTATGTTTATATCCTTTCTTTCTCATACAAAGTGCGTATACACTTAACAAAACCACTCTTCTTTGAA  
 CAGTAAAGAGAGAAACAAATAAAAAAGGGGTCCGGCCCTCCTCAGTATCACCTGGTAAGAGGCCGTTGATT  
 GGAATAGAAAATTTTCGGAAGAATTAGGTTTGAATAAATTTCTGGGATCCTCTTCTTTTGAAGTACAAACAT  
 GGGAATCGTTGAAATAGCTCTTTGATTGAAAGAGGATGATTCCTATAATACATTACTCCAGTCGAGTCCAATG  
 GAATTTCAAATGAAGATATTTTTATTTTGTTCAAAACGTGTTGCAGAACGATCTAGAAAGCAATTGATATTG  
 ATACAGTTTGCTTCTTAACCTCAATTAGTAGGACCCCTAGAGTCCACTTCTTCCCCACACTACGAGTGAAAGG  
 GAAAAAGTAAAGACTACCATTAAAGCAGCCCAAGCAAGACTTACTATATCCATATGAATTATGTCCCCTATC  
 TCTATAAATATAAAGGAATTGTTCCATTATTCCTCACTAATAATAGTGGAATCAATGGCGCAGAGTCAAAAA  
 GAACGAAGACTATTAATAAACCAATCCAATAAATTCGCTCATTTTATAAGAAATTCCTATATGATTTCTAATC  
 GGGAAAGATTAAACACAAGCAAAATCTGCAGTAACATCTCAAGGGAATGTTACTAATGGAACATGTAGGAA  
 TAATAGGTCCTATTCTTTTTTTGTTGACCCTCATTTCAATTGATTGGATGCTTGAGCACTCAGAGATTTTC

>TCONS\_00019289

CCTCGTCTGAGCTACGCATGCTTAAAGATCTTCATGCTGAGCCAATGGAAATATATTTTGACAACAAGGATGG  
 GAAGTGTTAAAGGAACCAGAAAGCAATAGTATCTGTCATTTTGGATGGCTGCAAGGATGGGGTTATCAAATG  
 GCGGAAGTAACTTGGACACAATAGCAGCATAAACAAACAGCAAAAAGGAAATGGACCCAAATGCAAGAAA  
 TGCCAATCCCTGAGCTTTCGAACCATACTTGTATATAGAACACAATGCCATCTGGTACAATATGATTATCTTGT  
 CAATACTTGAAAATTCTCAGGCTGGATATAACATAATACACCAGAAAGCGTTAAAATTAGGTCACCAGCTGT  
 TACCTGAGCAGAATCATCTCTTGCCTTTTCC

>TCONS\_00019293

TAGCTACCAGCTTCTTTGACATTTTTGTTCACTTCTCTTCTTCTGCTTCTCCATAAATGTTTTCTCAAAAAATC  
 CCATGGCTGAATGACCCAGAGAACGCCGGTACCGGCGGCGACGCCCCACATGGCGGCGGCCTGGATATCGG  
 TAGACTGAGGGCGGAATTTGGGGCGGAGTAACTGAAGAGTGTGTTTCTGCTGCAGCTGGGCTTGTATCTT  
 TGGCGTTCTCAAAATTATGAAGACGCTAGGTTTTGCTTTTCTAAACGCTGTAATAATGGAAGTGAAGATGATA  
 CCAAATCCTAGAAAAGCAGAGCCCCACAATTTAATGTCAAAGTTGC

>TCONS\_00019321

TTAGGATAGTTGTAGTTGGGGTAGTGTCTCTTCAGCATGTCAACCAAATCCTGTGATTTGCTTTTATGAGCCAT  
 GCATATGTGTCTACCTTCAGCTTCAGGTTTCTCATAAACAGCACCAGCGCTTCAGCTAAATCACGTACATCT  
 ATAATAAACCGGCTCTTGTTTTCCAGCTCTTCATATCCTTCTTTCAGCAGCTTAATGAGAACCAAACCTACTGGC  
 ATTTGTAGTCCTCTGCAACATTGGCCCCAAAACAAGTGTGGAAGCACAGTTATCATATCAAGTCCAGTTTGT  
 TTTGCATATGACCAAGCTTC

>TCONS\_00019432

TGAACCGAAAGGTTGACTATTTGGTACACGCTTTAAGTGACTACCCTCTCTAGTAGTTGTTCTGGAGGAATTC  
 CCGTTTGTTCACATTTTGAGAGTTTTGCTTGGGATGATAATATTGTCAGGAGTCCCCATACTGGCAATACCCC  
 GTACGAACAAAGTGATTGCAGACTCCTTTACCAAACGAATCAGGATCGTTATATAACTGAGGATTGCGCAAA

GAGTCGTACCAAAGAGCTTTAGCTCTCTGATGTTGAACGCCTTGAAGATGTCGCCTCCGAGCCGCTGCAGTAT  
CCTGGAATTCCTTATCGCAATAATCGCAGTAGTATTTCCCCAACGGCATTTTTA

>TCONS\_00019433

CAGACTTATCCCCAGTCAACAAAAGGGAGAGGCGGATAACCACCCTCTGGCGGAGGCCTTAGAGAGGGAGG  
CAGATTGCCAGCTTTGCTCCGGCATTCTCTGAACACATCACCTGCTGGAGGAATTCCCGTTTGTTGCACAT  
TTTGAGAGTTTTGCTTGGGATGATAATATTTGCAGGAGTCCCCATACTGGCAATACCCCGTACGAACAAAGTG  
ATTGCAGACTCCTTTACCAAACGAATCAGGATCGTTATATAACTGAGGATTGCGCAAAGAGTCGTACCAAAG  
AGCTTTAGCTCTCTGATGTTGAACGCCTTGAAGATGTCGCCTCCGAGCCGCTGCAGTATCCTGGAATTCCTTAT  
CGCAATAATCGCAGTAGTATTTCCCCAACGGCATTTTTA

>TCONS\_00019434

AGGTGGCAGACTTATCCCCAGTCAACAAAAGGGAGAGGCGGATAACCACCCTCTGGCGGAGGCCTTAGAGA  
GGGAGGCAGATTGCCAGCTTTGCTCCGGCATTCTCTGAACACATCACCTGCTGGAGGAATTCCCGTTTGTT  
GCACATTTTGAGAGTTTTGCTTGGGATGATAATATTTGCAGGAGTCCCCATACGTACGAACAAAGTGATTGCA  
GACTCCTTTACCAAACGAATCAGGATCGTTATATAACTGAGGATTGCGCAAAGAGTCGTACCAAAGAGCTTT  
AGCTCTCTGATGTTGAACGCCTTGAAGATGTCGCCTCCGAGCCGCTGCAGTATCCTGGAATTCCTTATCGCAA  
TAATCGCAGTAGTATTTCCCCAACGGCATTTTTA

>TCONS\_00019587

GTTGTTTTGTCAGTGCTCTTCACTGTTCTATACATCTGTAAGTGACTTTTACATGAGCTAATGTTAGATCCTTC  
ACATTCATCAACTCTAGCACCGATTTTGGTGTTGCTCGTTCATGTCCGCCTAGAAGCTGAACAGCATGAACAA  
AATGAGCATGAAGAGTTGAAGTCCATCTCATTCTAGGAGCTCTAACGCTTCTTTTACCCCCACTTATCATTCTT  
GAACCTTCTTTGAAATCGCGGCCGTATATTTGAGGTTGATATTGCTGGTGATGCTGATGCTGATGATGATATTG  
AAGGTTTCTATTTGGTAGTTGCCCAAACCCTAGACTTAGGGTCGGCTC

>TCONS\_00019681

TTGATCTATGGTCGATTTTCGTAACAAATCAAATAAAGAGGAATTTCTATTTGTACCTCGTAAAAAAGCTTTTT  
ATTTTGTTGAATGAACCATTTCCTTTCTTTTCGTGGAAAGAAATTATGTTCAAGTAAGCAAATATGTCATGGTT  
CTAGGAGTCTATCTATCGCGTATAGACTTTAAGGGCGTGTTGGCCTAACCATCGAGGTGAAGTCGGGACCTA  
AAAGATCGAATGGAACAATATATAGACAAGTAAATCCCTTATGGGTTCCAAG

>TCONS\_00019774

GAATGTGATCTCAATCTCTCCACCTGTGGCCACAATTCGGGTTGCAGCAAACAAAGAAGAGTGTACATACCTTC  
TTCTCCCCTTGCAAGTTGCCTGGAAGAAAAGTCTTCTCCATGACCACATTGAGAACATCGAACAGATTTTGTA  
CGAGGCAAAGTTGGATCTGCTGCTACATCCTGCAACACTTGTGTGCGTTCCGCAGCAGAATGATGTATCTCAT  
TTCTATACACGCAATTGTTTTAGCAGGCTCCTGATGGTCACAATTACGGCAAGCGTAAAGGAGAATCTTCTG  
CTCCTTATCTTCTTTAGGATACAAAATATTGTTACATTCTCGGCAAAATTCATAGTACTCATTTTCGCGAGTTT  
TTGTTTTGAATCGTTTAGCTTTTAGAGGGAAAATAGCGATTTGTTCTATACTCTGC

>TCONS\_00019892

TTTTTCTCGACTTACATATTCAGTCTTATCAATTTTGGTTCTCTGCTAACTGGTCTTCGCTTTTAGCTTTCTCTA  
CTAATTTAACTATGAATATTCAGACAGCAGCCTGATGCTTGCTCTGCTGTTTCTCTCCAGAAGGTGATGCATC  
TTCAAATGTGAAGATCCTCAGGATGTCTTGTGACAGGAAGATGGTTGTAGTGAATGGGCCTTCCTATTCTG  
CACTGATTTCTTTTATTTACTTGTTCCTCATAGATAGTTGTATTAAATGAAAC

>TCONS\_00020070

CTTACGTACGTCAATATCTTCAGGCAGATCATCCAGTGCCATCTCATATAAAACATCCCAGTCTGGTGTCATC  
ATGAGAATTTGTCCAAAACCAGTAATTACACCAAGAAGATCTCCATCTGGACTAGGTGATACACACTTTACTC



CACCCTCCACTCGGCCAACAATTTCTGTCGTATTATCATCCGCAGTATATAGCAATAGAAGACCATATGAAGT  
CCCAATAATCAATGCTTCTTTTTCCATTAGATAATCCATGGAAGTAATGAAATCCCCAGGCTCTAAGTCAATA  
AGGTTATCTGATATGGAATTCGAAGCTCCTGCATTCTGCTACAGCACCAAGATGAGGAGAAGGCAGAAGTAA  
ACTGTATATGAAGTTGGAAGAGGAAGCTAAGAAGAGGCGATTGTGCTCCACGTCAAATGCTGCGAAGCTGAT  
AACTTCATCCTCGGAATTTAACTGAATCTTCGACAATTGCTCCTTCAATATCTTCAGATTCTTCATCTTCTATC  
>TCONS\_00020100

AAAAGAAACACTAACAAAAATTTCTTCAATCACCCTTATCTAAATAATAGTCAAAGCAATTGGTCACGAAT  
TCCTAAATTAGTTATTGAATTGTTGCCTTCAATTCCAGTGCTATCTTCCTCACACTTTTGAATGGGATACGTAGC  
AAGAATGAGAGATCAATTCCACTATTCACATCCTCTACAAATCTACAAACACGATATCACTGGTTTTTCTTTT  
GTTTGGTGTAAGGACGGCTTCTACAGTCTAATATCTTGTAGAGCTCATTAAATACAACCTATACAAATGAA  
AGTGTAGCAAGATATGAAATAAAAGCAAAACATCAAAGCAAGAGAATTTCAATTGGGCACGATAAGGATAC  
CAATTAAGCGCCATCTTTTTTAAGTGGATAAATTACAAATTAGACATCATAAA

>TCONS\_00020223

GGGGGAATCAGACTAGGCTGTCCTGTTCTAGAAGAGGAAGCGTAGCTGGCACGTTGAACCATGTCTGTCAA  
CGGTGAAAGATAGCCCTAAAGTGAGGGCCCCGGAGATAGTATTTCTCAACTGTGCTGATCGACGTGACAATCAT  
GCCTGCTTGACAAAGCCTTTTTTCATTTCAGTCTCCCAATAAACGAAAAAGGATTTCTGGTGACACGAAAGCTGT  
GCTCGACGCTCTCTTTCCTATTCCACTGCGCTAAGTGGTCTTTCCCTTTCTTGCTGGATGACTACTATGGAAAA  
AGATGACGACTACTCCCAGTCTCTGGTCAATCCATGCTGATGCTAGAAGAGCTATTCCCGCCGCCACCCGA  
AAGAGACGAGGAAGACTAACC GCCATCCTGCTCGAACCTTTGCTGCCTGAGTTATATAGCTGACTGCGAGAA  
GGAAGGTTCAAGCTATGGCTGCCCCATGGGATGCTCATTTGAAACCTTTGTCCGGTCAATGCGAGAAAGAGA  
GAAGTGATGTAAACATAAGAATGGAAGGTTTGTCTGTCAGCTGTGCGGCCAATGAGGCTCTTCTAGCTTTACC  
TACACGGCAAGGGAAAGATCAAAGGCGAGGTGGGAAATGCCCCGCACGAACTATCTGATCAAGTTTTCTTTT  
TCCTATCACAGGCAGCTGGCAAAGCCGTGTTTGATCGTCGCTACATGCTCCGTTACAGCCTCGTTCATGCGC  
CAATCAATTGACAGTGAAGCAGAGAAGGAAGAGTTTGTATCACCGTGTGGGTAGTCTCTATTAGGCTTTTCCTT  
TCTTTCGGGGCCATTTCTTCGCCCTTTCTTCTTAGTCTGAGGCATCTCCCTCTCGTCCTATTGTGGTAAGTTAAT  
CGTAAAGTCTTGGAAGTTAGGGTTTTGCAATCATTCCAATCCCTCTAGTCTTGGTAGTTTCATTAAGCCATTCT  
GCTATCATTTCTAGTTGTTAGTGAAGTGACTGCCTGATGTTTCGATCGTGTAAGTGGCACCGCAGCCAATGAATG  
TCCTCAACTCGGAGAAAGGGAATAAG

>TCONS\_00020336

GAAAAACATGGTTGAGAACTAAACATTTTGTGCAACATCATACTATGTTGTTGAATGAGGGGTTTCTTTT  
TCCATCTCCATATAAAATGTAGACATGAGGGACAGGGTAAGCCAACAAGCCTATTGCAGCCTCAAACACATC  
AATGCAATATCCTTTCACTCCAGAAGGTCCTTTGTCTTTATTACAAACTCTTCAAAAGTAACACGGAAAGGA  
ACGGCAATACGCAGGGGTTTGCCATTATTGGGGAACACCCATCCTCGAGGCGGTTTATAGTTTCTCCTGGCC  
ATATAGCATTATATAGATGTTGGTTACTTGTGTAAGTATTTGCAGGCATTGTGTATAAAACCTCTGGAGTTATA  
ACAGAGAGACCAGAATAGTTTGACCAGTAACCTATCGTGCGTAATCCAGTGCCACCTATATTAAGAACATCA  
TATGCTGAATGAATCAAATTCTTCTGAGAATCAAACCTGAATCTGACCAGTTAAACCAGTGAAGTTCAGGGCA  
GTAAGTATCTCAAGTAACTTGTGCCCTTGGTTCG

>TCONS\_00020386

ATATATATTACAGGAAGAAGATCTATATGAAATTGACATTCCATTGAGATTTACATCTGCTGCTAGCACTAGA  
ATTGATGGGCTGGCTTGCTGGTTTGATGTACTTTTAAATGGAAGCACTGTACCGAGGTGCTGACCACGGCTCCC  
GGTGACCTACAACCTACTGGTATCAGCTTCGGTGCGTGTGGCACAGCCACTTTATGTCATGCCAGGACAGG  
AGATAAATGGCAGCCTTCGCCTGGTTGCCATAAGGCACAAAGTTACACAATTTATCTAACATTGTCTGCTAC

TGTTGGAGATGTGCTCCAAACATCATCCGGAAACTTGATCTGAAGGAACCATATTACCGGATGTCCCAACC  
ACA

>TCONS\_00020411

AATGATCCGAGATGCATACAGTAAACCCAACGTGAGAAATGATGGTTCTTTTTCTTGACGTAGGACAATACT  
CTCCAAGCAATCCAATGGATCCCAAATAGAAGATGGCTTGTTCCGACATAAAAGAAGTTTCACTTAGACCAC  
TAACTCTGAACTCCACAAAAATCACACTACCTGCAACCTTATAGATTTGAAACGAGGAGGAACAAATCT  
GCAATAGAATGAAAGAGGAGAGAACTGGAACACGTAAAATAGGGTTTAATATAGAGGAAAGGGAAGTGA  
GGAGGAGGACAGGCAGCCCTAGAAGATTGTTTATATAGGGTTGGGAAGGGTATTATACCAGATACTTCTCTG

>TCONS\_00020473

AGGAAGAACTGAAATCCATTGAAGGACTTCAACCCGCTTCTCGATCCTGTAAAGAGGTGACAGATTTTGTGTT  
GGAACATTCAGATCCTCTTATACCAACAATAAAGAAGAGTCGTAGATCCTGTTGCTTTTGAAACGGCTCTGT  
GGCTCGTCATGTTTCAATATCTCATGGATGTGCTGCTGGTGCCGGTGTCTCATATAAAGATGCCAGACTGCTG  
TAAATGTAATATATGTAAGTCTGCTCATCTGTCAGTTGCTGTTGCTCAATACCTAAGTGTCAATGTTTCTCGT  
GTCCGCCGTCTAATTGCTGCAGCAAGCCTGTCTGCTGCAAATGGAGTTGCTGTTGCAGCTGTAGCTTTAAATG  
GCCTTCTTGCTTAAGCTGCTCTTGTAGCCCATGTACATGTTCTTACCCTAAATGTCCAAAGTTAAATTGTAGTTC  
TTGTTGTA AAAAGTCATGTTTCTGCCCTTGCTACCTTTGTTGCTAGTTGTACTATTAAATCATGCAATAATTCT  
ATATAAAAG

>TCONS\_00020477

CTAATGCAGTGGAAGTGGAACGCATGGTTGCAAACCTCCCAAGCCACTGTGCATTCCTCACTTGTTGCACTAG  
CTTGATTAGCTTGACATTCAATACAGAGATCCATGATGTGGTTCCCTACAGATAGCACAGTTATCGACCACAAT  
ATCCCAAGCCCATAGAGAGACAGCGTTCCACTTTTTTATCTCAAAACGCTTGGCCTTCTTAGTGGAAGATGAT  
GATGAAGCTCCGGCACCGGTAGAACCCTCGCCGGCCGAACCATAGTCACGTCGGTGTGACAGATGCCATT  
GAACAGAAGCTATAACACGCTCCTTTGGAATTCAATATACA

>TCONS\_00020516

TACAACAAAGAAACAAAGAGTTCTCATAACTTAGTCTCTTTCCTATCGAACAAAGAAATTATGCCTAATAGA  
TACACATAAAGGACTTAAATCAGCTGTTTTTTGGGCTTCCCAAATTCTTTACTCCTGTTCTTACTGCTTCTAGA  
TTCCTCTTCCCGCATTAAATCAGTAGTCATCGTTGGCTTATGCAGCACCTAAAACGGGCCTTTCTGACAGTTGT  
CATGATCTCTGTCTCTGCGACCTCGAGCATTCTGACCACTTGAGAGAATGGTGGCCTATTATCAGGGTTAGCA  
TCCCAGCAGCGGGTCATGATCTCACTTAGGACAGGCAAACAATCATTGGGGATTGCTGGACGAACACCTTTG  
TTGACAACAGCAAAAGCTGCCTGCACAGCAGTCATTTTCTGGAAGGGAAGCATCCCTGTTATGAGTTCCAC  
AGAACGATGCCAAAACCTATAAACATCGACTTTGTGGGTGTAAGCTCGATGCTGGATCATCTCCGGAGCCATC  
CAGCGGTATGTTCCAGTCTCTGGTGTCAATTCCTTCAGTCTGCACTTCAATACGAGCAACCCCAAAATCCGCAA  
TCTTGATCGACTTGTCGCAGCAATCAGTAGATTGTCAGATTTACAGGTCACGATGTATCAGATTCAGGCCATG  
TACATATTCCATCCCCCTTGCCACGTCTAATGCCTGCTTCACCGCTAACTTCAAGGGCACTGATCGATTTTGTC  
TCCTGGCCAGAACTGACGCACAGATCCCCCTTTTGCAATTTCAGTCACAATACACCAGACCA

>TCONS\_00020526

AAGTCATGTGCGGTAGCAATACCAAACCAAATACGACGAGTAGTGGGGTCTGAGCTAAGCCTTGGCTAAAC  
CTTGAAATCGTAATGCCATAATACTTTTCAAATCCTCCTAGCCATTATCCTACTGCAATAATTCTTGCTAAGA  
AGAATGCCCATGTTGTGGCAATTCCACCCAGAAGGTAATGGGTTACTCTTACAGCACGTCCTTGTATAATGCT  
CAAGGCTCTCGGCTGAGTAGCAGGAGCAACTTTTAATTTATCATGAGCCCAAACGATGGATTCAATAAGTTCT  
TGCCAATAACCACGTCCACTGAATAGAAACATTAACTAAAAGCCCAGACAAAATGAGTACCTAGGAAAAA  
AAGGCCATATGCAGATAATGAAGAACCATAAGACTGAATTACCTGGGATGCCTGTGCCCATAAAGAAATCGC

GGAGCCACCCATTAATAGTAATAGAACTTTGCGCAAAGTTTCTTACACTGCCCCAAACATCTGACTGCATTTT  
 CCAACTGAAATGGAATATTACTACCGAAATTGCATTGTACATCCAGAATAGTCCTAAGAAGACATGATCCCA  
 GGCCGATACTTGACATGTACCCCTCTTCCAGGTCCATCACAAGGAAAACGAAAACCAAGATTTGCTTTATCC  
 GGTATCAAACGAGAACTGCGAGCAAATAGAACACCTTTCAAGAGTATCAATACCGTCACATGAATCGTAAAT  
 GCATGAATGTGATGTACCAAGAAATCCGCGGTTCTTAATGGAATAGGCAACAAAGCCACCTTGCCACCCACT  
 GCCACTAAATCACCACCCCCCAAGTTAACTGGTACTTGCTGTTGCGCCAGGAGCCGTTGCACCAGGTGCT  
 AAAGCATGGGTGTTTTGTATCCATTGAGCAAAAACAGGTTGTAATTGTATAGCGGTATCTGAAAACATATCTT  
 GAGGACGCCCTAAAGCGCTCATGGTATCATTATGAATATACAAACCAAAAACCTGTGAAAGCCTAGAAATATAC  
 ATGCCCAGTTGAGATGGGATATGATTGCATCACGATGTCTAAGGACACGATCTAATAGATCGTTGTACCGAGT  
 AGTTGGATCATAATCTCTTACCATAAAAATGGCTGCATGCGCGGCAGCACCAACTATGAGAAATCCACCAAT  
 CCACATGTGATGTGTGAACAATGACAGTTGTGTACCATAGTCAGTAGCTAGATACGGATAAGGGGGCATGGA  
 ATACATATGGTGAGCTACAACAATGGTTAAAGAGCCTAACATAGCTAAGTTAAGAGATAATTGAGCATGCCA  
 TGACGTTGTTAGGATCTCATATAGGCCTTTATGGCCCTGACCTGTAAATGGACCTTTATGAGCTTCTAAAATAT  
 CTTTATAGTCCATGACCAATACCCCAGTTGGTCCTATACATGTGACCTGCTATCAGGAAAAGAATTGCAATAGC  
 TAAATGGTGATGGGCAATATCAGTCAGCCACAGACCCCCAGTTACTGGATCTAATCCTCCACGAAAAGTAAG  
 AAAGTCCGCATATTTTGACCAATTCAAGGTGAAAAATGGGGTTGCTCCCTCGGCAAAACTGGGATAAAGTTG  
 AGCCAAAAGATCTCGATTCAAGATAAATTCATGAGGAAGTGGTATCTCTTTAGGATCTACTCCAGCGTTTAGA  
 AATTGGTTAATCGGTAAAGATACATGTACTTGATGCCCCGCCCAAGAGAGAGACCCAAGTCCTAGTAGCCCT  
 GCCAAATGGTGATTGAGCATAGATTCTACATCTTGAAACCAAGCCAATTTTGCGCGCGCTTTATGATAATGAA  
 ACCAACCGCAAAAAGCATTAAACGCTGCAAGACCAATGCCCAATTGCTGTACAATAGAGTTGTAATTCAT  
 AGTTATTCCAGATGCTCGCCAAATCTGAAAAAAACCAGAGGTTATTTGTATTCTCGGAAACCCCCGCCTACG  
 TCACCATTTAATATTTCTTGGCCCACTATTGGCCAAACCACCTGGGCACTAGGCCCAATGTGAGTTGGATCAC  
 TTAGCCACGCTTCATAATTAGAAAAACGAGCACCGTGGAATACATGCCGCTCAGCCAAAGAAAGATGATG  
 GAGAGTTGACCGAAATGTGCACTAAATACTTTTCGAGAGATCTCCTCAAATCACTGGTATGGCTATCGAAAT  
 CGTGAGCATCAGCATGTAGGTTCCAGATCCAAGTGGTAGTATCAGGCCCTTTAGCTATTGTTCTTGAGAAATG  
 ACCCGGTCTGGCCCATTCCTCGAACGAAGTTTTTACGGGATCCCTATCTACCAAAATTTTAACCTTCTGGTTCCG  
 GCGAACGAATAATCATTGAGTCCTCCTCTTTCCGGACAACACATACAAAGAGACCCGCCAACAGTCAAATAA  
 TTAGTGAACCTTAGAGATAGAGAGATATTTCTATAATTAGTTTGTCTCTTCTATTTTCTATCTCCCATCTATC  
 TATTTCTTTAGTTATTTACTAGAGCAATTATGATCTGGAAGTCGATCCGGGGCAAGTGTTCCGATCTATTATG  
 ACATAGCCTTGAGGCGCTCAACGGACCTTTTAACCTTCTAAAAACCTTTTTGGGCTTTGGATTGATCCAAAAA  
 CGAC

>TCONS\_00020554

GTGCAAGCAAATTACCAAACGAAAATGTTATTCCAAACTTGATCGGGTTGAAGAAAACCAGCATTGACAAG  
 AGAGTACAGGCGATACCAGTTGACAAGCATATAGCAAAACCATAAAGCCTCTGTTTGGTAGATAAAGTGCA  
 GTTGCGATTAAAATCATCCATGAAAGATTCTGCTGAGGAGCTGCTTCTTCATCTTCTACATCCATTCCCACCA  
 GCATTTTCATCTTCTCCAAAGCCTGGTTCATTTTCTCCATTTTTTTCCCTTTTTTCG

>TCONS\_00020555

TACATCTCACAAAAACCACACATTTTATCTTCTTGAACATCTTCCATGTTGTGCTCATAACGAAGTAGTTTCTT  
 TTTAGCCCATTAGTGATAGTATACGGATCCTGTTTGGTAGATAAAGTGCAGTTGCGATTAAAATCATCCATGA  
 AAGATTCTGCTGAGGAGCTGCTTCTTCATCTTCTACATCCATTCCCACCAGCATTTTCATCTTCTCCAAAGCC  
 TGGTTCATTTTCTCCATTTTTTTCCCTTTTTTCG

>TCONS\_00020559

ATTTAATTTGATGCTCCCTGAAATCATGAGAAAGTCGCTCAAACCCGCAAGTATTCTCTTTATAGATTGCCTCT  
TCCTCCAATGTAAAATTTTCTCTTTGATTGACTTCTTCACACATGCCTTTTGGTTTCTTCTCTTTAATCCTGTAAG  
GAAAGAACAGAATACAGCTTAACGTTTTCCACCGCCACCACCGAGCTTAGGACCTTTCCCTCCAGCTCCCTTG  
GGCATGTTGCCCTTCCCTCCAGCTTTCTGTGACTTGGCCTGCACCTCTGCCTTCTTGGCCTTCTTCTCATCCTTTG  
TCTTCTTGATCCTTTCCCTTGATTTACGGAGAGCAGCCTCCCTAGCAGCATCTCTAACTTCTGGCCTTTCAGTTC  
TCTTCTTCTGGATAACCTCCAGGGTTGCACCCACAATGGACCTGGAGTAAGGCTTCTTTGTTGCACGTCGCCTC  
TTCTTAACAGCTTCTTGTGCAATATCCTTCTTGTGCTGCTTCTGTACATAGCTGTCCAAGTAAGTTTGGAAGGC  
TTCAGGCGATTGTGAAAGTACCGTTTGCATTTTGAGTTGAGAAACAGGAACACCTGAGAATCTGAACGAATA  
AATCTGATGCCCCCTCCAGGATATATCTTGCCACCCTAAAACGACATAATTCCGTCTTGAGAACCATTGTTG  
ATGCAGCTGCGAGCTCTCACGTTGCGATGTCCCGAAAATGGAGAAAAAAACCCTAGTGAACAACGCTTATAT  
TGGAATTGGAGGAAAGATTTTGGGCCAAAAAGAAAAGCAAACCTAACATAAGCCCAAGAAGTGGACCTCTT  
AATGGGAAAAAGGCTGCACCAATATTGGGTCAGTCCAATATTCAAAATCATACCACAAATCAATCGGTATAG  
GTTGGGTGGGCCAGCCCATTTGGG

>TCONS\_00020647

TCCCTTTATATAACTGATCATTCGAGCTGTAACACCAACTTAACAATCGAGACAAAAAACTAAATTCCCAG  
ATCAAATGAAGGAGAGTTTCCGCCATCAGGAATTTGTGTAATAGGTATTGAATTCAGTGTATTCCGAACCAAG  
GACTGTGATTTATTTCTAAGAATTCTAGCAGCCTCTGCTTCCATTGCATCAAGATCGATACTTTGAAAGAACTG  
GTCATCATCAAATGGATCACCAACTTCATTCTTTGCTGCTTCTTCCAAAAGATTGGTTGAGCATGGTACTGCTT  
CTGGTGCAATTCTATTAATACTTTGCTGAAAGTTCAAGGAATTTCTCGTTATTGACTTTGGGTCAGTTTGAGGT  
ATGTGATGATTTGCTGTTGCAGATGAGCTCTTGCTTTCATCTGTTCTGCTAGTTGGAACCTCAGAATCAGGAGT  
ATAATCGTTTGAAGGTTTGAATTTGGTGACTGAGTGAGCAATGAACGCCTGTGATTAAAGATTGGCTTAGGT  
CCAGAAATCAAGGCAATGCAGCCGTGATCATCAGATGATCTATGACTTCATGAAAATATTACTAAAAGGGAA  
TCTATCTCCCTGATAAAAAATGGTACTTTG

>TCONS\_00020722

AGAAGGCCTGAAAAGTGATTCTAACTAGAACACAACCACTCTTCTGGGAAACAGGTTGACCTCGTATCTGC  
ACTGTTGGAGGCTTTGCATTATTCGATGCTGGTTGGCTTGCCATCCTATTCTTTATGTCAGCTGCCATTGCCATG  
AACGCCTGCTCAACATTAGTGGCATTCTTTGCACTAGTCTCCATGAATGGAATACCAATTTATCAGCAAATG  
CCTTTGCTGTATCATAAGACACAGCACGGTTGTCAGCCAGGTCGCACTTATTTCCAACCAGAAGCTTGTTTAC  
ATTGTCACTCGCATAACGATCAATCTCACTCAACCATTGCTTAACATTGTTAAAGCTTTCTTGGTCAGTTACAT  
CATAAACTATAATGATGCCATGTGCCCCACGGTAGTAATACTAGGTAATCGTCCTGAAGCGCTCTTGTCACG  
AGTGTCCCAAATTTGAAGTTTCATTGTCTTCCCATCTTGCTCCACAGTGCGTATTTTGAAGTCGACACCAATTG  
TGCTGATGTAAGTGTCCAAATAAGAATCATCAGCAAATCTCAGGAGAAGACATGACTTTCCAACACCAGAAT  
CTCCTATTAATAAAAAGTTTAAACAAGTAATCATATTAGGATTCATGATTTTAAAGCCGACTGATCCAAAGGCG  
ACGGGAACACGGTCCACCCAACGGACGGATAACTGATGGCGAAATCGGATCGT

>TCONS\_00020746

AATTGGCCATAGACTTGCTCATGGATTGACTATGAAATAAGATGAAGTAAATTGTAACCTCCAGATCACA  
CTATTCTTTTGGATGTCTTAAACTTTCTATATATGTGGTAGAAGATTTATGAAGCCGAGTTTTCGTAGGAACA  
TGAAGTGCATAGCTACAAGAAGACCAGAGCTTCCCATCATAGTGAAAAGACCAAAAATATAACTATTGGTGCT  
TACTGCATACTAGTTTACTGTCAAGGACCTGCTCACCTTCTTTCCATTTAATTTTGACATGCAGCAGAAAAATA  
GACGACTGAACTCTATCTCTTTACAACCTTCTCGATCTGTATTGTCATAACGTCGTGTTTCCTTTAACTAAGA  
TGTCTCTTGATGGCTACCAATATAGGATCACAATTGTTAATCAACATCATGTGTTCCAAAATTTACCTGTACCT  
TACTAATTTACCTTTCTTTCTTTTGTGTTTTTAATATGCTTAGATTGGTTATGATAAGCAAGGACTTCCAATAG

GCTTGCAGCTTATTGGTCGTCCGTGGTGTGAAGCTACAATCTTGCGTTTAGCTACTGTGATAGAGGAAATCTCT  
GCAGAGTATAGGAAGAAGCCAGTGGAGTACTATGACATCTTGAAAGGGAAGTGAGAATAATGTTTTACAAG  
ACACAATTGAA

>TCONS\_00020846

TTACTATCTTGTCCGTACTCCCTGACTAAAGCTTATCCGAGCCTGATGGCAAAGCAATCCCTATTACATGCTTC  
AGATATGTTGTCAACATCTATTGTCGCACTTGGTTAATGAATCTCAGTAACAAAAGTTGTACTTAAAGCTCAA  
AAAAGATATTGATTATCTTTCGAGTGTGAGACTAAATTTGAAAAACTTCTTTAAATACAACATTTGTAGCTTC  
AGTAGTTATATTCCCATCGTCATCACAAACCAATATTTTTAATCCCTTTCTACTCGTCACTCGAGAAAGAGCA  
ACATATAGCTGTCCATGTGTAAAAACTGG

>TCONS\_00020877

CCTAATTACGAAAGAAACCCTGTTGATTGCGCAAAGATCTACAAGCCAGGATTCTAGAGAAAGAGATGCTAT  
TAAGGATACTTTAACAGAACCTTGTTTGTACTGAGCTGGGTAACATAAAACCCTATCCCCCTCCCTTTCTTAATA  
GTAGATAGATGTAGAGCTGGAGACTCCCTCAATAGGGCATCTCAATCTGGCTCTCAATCTATCGTGTAAGGA  
ACGAAGACCATAGGCATAGGGTAATAGCTCCTTACTTGTAATTGAGATAGGGGCTCGTTTGATACAAGTATTT  
CATTTTGATCTCCTCCCTCACTTCTTTCTATAAAGAATTCTCAAAAAAGGAGTCAACCTGTCTAAACTTCTCTA  
CAAAAGTCTTCCCCCTCGCTGCTGGTCTTTAACTTGCAACTGCTATCTAAGTCTAAGACAAGAGATTTTTCTTA  
CTCTTAAGTTTGATTTTTCGCTAGAAGCCTTA

>TCONS\_00020963

GAGTAATAATAAAAATGAACTGCAAAGAGGTATTGATTAAAAGGAAAAGTTGGTCTCCATACTTGATAAAAT  
ACTAGTTCGAATAAGTATCCGCTAAAACCTTCAAAACAACCAAGATAAAGATCCCAATATCAAAATACAGTGC  
CAGCAATAAACAGAAGGCGGCCTGTTACTCTAAATCTTTTACTCTTCATTAGCAGAGTCCACGTTCTTGTTGT  
TGTTGTGCTTCCTAGCATACCTCTGGTTCCTCAAGAACTTGGGATCCATCCCTTTGGTGGAGCTGTGACGGTGT  
TTCCTGGGTTTCTTGATTCCATTCTGTGAGCCTTGACGACTGATTGTGAGCTGTGTGATTCTTCGACTTGGCC  
ATTTTTGGTCTTGATTTACAAACAACCTGCAGCCGGCGTTAGGGTTTTTCGGTAGTGATGAGG

>TCONS\_00020978

CAGACTTCATACCCAAATATGATGTTGTGCAAGGTAGTAATATGTAGTAGTTGCCAGTGCATTGCTTAGGTA  
TTCAGAAACGGGTGGCTTATATCCTTCAATAAACCATGTTGACTCGACATTATAATTTCTTACTACTTCTTTTCA  
TCTTTCAATTGCATGGCAGACAATATGAGATCTTCCAGCACTAGACAGTTCCTTTTCATAATCCTTGTAAGAT  
CTAGAATAGCTTTATAACTGATTTTCATGTAATCAGGAAGCCGATCAATTTCTTGATATCCCATCTTTGTATG  
GCATCTGTGTATGCCTCAAGTTCTTTAACTGTACCGTAAGCATCAAAGGTGTCATCGACAATAGAAATCATTG  
ATATGGTCTTAACGAGCATGACGCGGGCTTGAGAGTATTGAGGCTCAAATAAACTCCTAACGCCCAAAAGT  
AACATTCAACTACTCGATCTCT

>TCONS\_00020979

GGCAGCTCAAATTTTCGATGGAGTCCACAAGTAGGCCAATAATGTGAGGTTTTAAGACTTTCTCCGGATGAGTA  
TATCCATCTAGATTGTGTATATATGTAACCTCAACAATACGAGCAAGATTGAGAATAGGAGTTAAAAGCTCT  
GCAGATACTGGAGTTGGCCTAAGAAGTCCTTCATTAAGATCCTTCCATGCTGTCTCAGCCATTTGTTGGAATTT  
ATCCATTGCCTCTTTTGTGATACACCATAATCTCTCATGCAACACTCAATCCCTGTTGCAATTTGTCCCTCTGC  
AGATACAGGAGTTGGCCTAAGAAGTCCTTCATTAAGATCCTTCCATGCTGTCTCAGCCATTTTTTGGAAATTTAT  
CCATTGCCTCTTTAGTTGATACACCATAATCTCTCATGCAACACTCAATACCTGTTGCAATTTGTCCCCTGCTTT  
TCTCAACCT

>TCONS\_00020980

GGCAGCTCAAATTTTCGATGGAGTCCACAAGTAGGCCAATAATGTGAGGTTTTAAGACTTTCTCCGGATGAGTA  
TATCCATCTAGATTGTGTATATATGTAACCTCAACAATACGAGCAAGATTGAGAATAGGATTAAAACTCTGC  
AGATACAGGAGTTGGCCTAAGAAGTCCTTCATTAAGATCCTTCCATGCTGTCTCAGCCATTTTTTGGAAATTTAT  
CCATTGCCTCTTTAGTTGATACACCATAATCTCTCATGCAAACTCAATACCTGTTGCAATTTGTCCCCTGCTTT  
TCTCAACCT

>TCONS\_00020981

GGCAGCTCAAATTTTCGATGGAGTCCACAAGTAGGCCAATAATGTGAGGTTTTAAGACTTTCTCCGGATGAGTA  
TATCCATCTAGATTGTGTATATATGTAACCTCAACAATACGAGCAAGATTGAGAATAGGAGTTAAAACTCT  
GCAGATACAGGAGTTGGCCTAAGAAGTCCTTCATTAAGATCCTTCCATGCTGTCTCAGCCATTTTTTGGAAATTT  
ATCCATTGCCTCTTTAGTTGATACACCATAATCTCTCATGCAAACTCAATACCTGTTGCAATTTGTCCCCTGC  
TTTTCTCAACCT

>TCONS\_00021003

TTGTGCCTCGGCACAATTTACTACAAATAAAGAGCAAAATCAACTCAAAATCTAAGCTTGGAAGAAGACCA  
GCGATTTTTCCCAGTCTTAAATCGCTCTTCAAACCTTAGCTTTTCGCCTCTTTAGCAGCAGTCACCTTCTTATCACG  
TGACTGAAGACAATCAACAGTAACAGCTTCCTTCAAATCAACATCCAATGTGTAACGCGTCGGCATAATGTG  
ATTGTAATTAACGAGCTTAATGAAAGTCTTAACCCGTGATTTCTTCGCCTGTTTTTATCAGAATCCTTACGAA  
TCACCTTCTTTGGGTATTTTCGATACGCCGACGACCAAACAGTGACCGTACGGCCTGTCACGTGTCCCATCGTC  
AAAGGCTCGAACAATCACAGCTTTCCTCCCGGCGTAGCGTCCTTGGAGTACGACTACGGCTTTGTTTGGCTTC  
AG

>TCONS\_00021155

TTTCTCTGTTTGTTCATTTAGGAAGTTGGGTGTTACGTTTATGGTGCTTTTCGCCTTGTATGAAGTAAAGTATT  
TACTTGCCCATCTCGTTGCTCTGATGGACACTTTCTTCCATGGAGACTAATGGGAAAATGTAGCTGGTTTTTGG  
CTTGACATTGTCTGTATAGAAGGTATTTAGAATGGCAGATTTGCAGAGGTAGTATGACGCGCACAACATGAG  
TTTGAATCCTGTTGCACCAAGTTAATGGAGAACGGTAGAGCTAGCGGACCCTTCATCCATTGAGTTCGAAGAT  
AAACCAAGCGAATTCAAACCTCTTGGGAAGCATCA

>TCONS\_00021171

CAACAACGTTAGCTACTATGTCACATCCTCATCATCCCTTCCCAAATACAAACAAAGTCCGTCATCTTCCCCA  
TCCCAATTAACGTAATCCAGCATTTAATAACCCAGTAACAAATTGCATGAATTCCGGGTCCGATTCTAATCCAT  
CCATTGTTTCCGGTGCCAACACCACCTCCAAATCAACGCTGCCGCCGCCTTCTCTTCCCGGAAACGCTGATAT  
CTTGCCGTCAAATTTATTGGCCCGTCCGCTCCGAACAGCGATGGGTCTGCCCCACCCAAAATCATTATCGTAC  
ATTGGAATCTTGGGGAGCTTCCCATTGTGAGCATAGCTCCGTGCAAATTCCTAGCGGGAAACACCGTGGG  
TCGCTCTCCCAATCCTCTACGTACTTCCTCACCATATCGTTATCGTGCACCTTCACGTTCTTGTTCAATTGCTCC  
GCGCACCATCGTAAATCGTGAGATAAAACGTCACCGGCCGACGCGTAAGTCGGAATGCTCTGAATAGCGTTG  
CCGAAATATAATGGATGGAGCTTTGGCTGGAGTCTATGCCGGCAATTAACGGCCATCCGAAATGTCGTCATTT  
TGGAAGCATGAAATTTCTCGCACGTGTCACCGCACGCCAAAGCAATGCGCAAAGTGATTGAAATGATGAGA  
TCTCAGCCGTTTGATTTTCAGTTATACCTTCTGTTTCTGTTTTCTTAACCGCATTCTCAACCAAGTTAACGTCG  
TTACTTTGCCGTCAGACATTTTGAAGGGATCGTTACTCTGTTTCCC

>TCONS\_00021194

TTGATATACAGGTAGAGCTTCTTGAATCATCAATACTGTCAAGGTACAGCATTGTTGCCAATATCTGGTTGCT  
AAATTCTTCATCTATGTGTTGTCCGATGAAAATAACACGTTACGGTAAAGAGCATTCCACAAATCAACCCAC  
TGCCACATTCCCTCAGTTGGATTTCTGTAGGGCACCCCTTGGGGTCCCAATGGGCATCATGGAAACTCGTGCAC  
GTGTTGGTTTACTGTTTC

>TCONS\_00021197

CTAAATAAGTAAATCAAAAGAGTACATATGTAGATTGAACTAAAAAATCGCAAAATAAGACTGCAAGTTTT  
ACAACCACTATCAGCCATTCCGTTTACAAGGCATATGAACTAACCAAGACCTGCAGTGGTATCCTTTCGTGGA  
GCATCCGCCTTAATACGGGGAGGCCTAACTATACGGTCTATAAGACCATATTCAAGAGCTTCTTGAGCATTGA  
ATCGCTTCATCCGACTTAAATCCTTGTGAACCTTTTCAACAGGCTGGCCTGTCTTCTCAGCCAATTCCTTGAAA  
AGGTAATCTCTAATTCTGAGAAGTTCATCTGCTTCAT

>TCONS\_00021205

ATGGGGTAAAATACGTCTCAGCACTAACTGTCCCACTTCAAATTTCTTGGACGCACTTTCTTGTTGTACGCTC  
TTGCCATTCTTTGCTGGTACAATTGGCCATGACACACTGATGCCAACCTTTTCTCATCAATCAAACCTCAACTGT  
TCAAGGCGGGTCTTCACCCATTTCATCATCAATCTCAGCCTCCGCAATAATTGAAGGGATGGGATTTCCA  
CTTCTGCAGGTATTACTGCTTCGGTGCCATACACCAATGAATAAGGAGTCGCCCCCACTGAAGTAC

>TCONS\_00021211

GTAGTTTTACCTCGACCTCAACTGGAGCAGTTCCTACTACTTCTACTGGTGCAGATTGAACCTCAACACTGG  
CCATTGGAAATGGAGAAATAAACTTGAACTAAAGATTTGAAGAAAGAGTAAAGAAGAAAAGGAGCAAAG  
GTGGCCAAAGTGCTTTGAATGTGAGACTGATGATGAGAAATGATCAATTGAGGGCTATTTATAGGGAAGTAA  
AA

>TCONS\_00021271

GAAAATAAGAGGAAAACCTATTCCCTTGTTGAATAGGAATCGCGCCCAAAAACATCAAAAATTAATCGCGC  
CCAAAAACATCAGGATTAATCGAACAGAGTCACGACTTTGCAAGCCTACTTCGACCAGATTTTCGATCATCTTT  
TTCCCTTGTTGAACGGATGCAGAATCGCGCCAGATCCTACATCGAACAGGATTAACAAAGCCGCGACTCTGC  
TAGCCTACATCGATC

>TCONS\_00021311

GGTACTTCTCTCTATCTGTAGATCCTTTTAACTTTTTGCTTACCAGGATGTTTCTTGATCATGCACTTCCTTGGT  
AACCATCTTTTATAAGATTCTCTTTTACCAAAAAAAGGACTATGCAAATGAACTTACGGAGAGTCTGTCTGTG  
TCATCTATTATCTTTATTTTCATCCTTTTTATGATGTCTAATTTGTAATTTATCCACTTAAAAAAGATGGCGCTTA  
ATTGGTATCCTTATCGTGCCCAATTGAAATTCCTTGTCTTTGATGTTTTGCTTTTATTTTCATATCTTGCTACACTT  
TCATTTGTATAGTTGTATTTAATGAGCTCTACAAGATATTAGACTGTAGGAAGCCGTCCTTTACACCAAACA  
AAAGGAAAAACCAGTGATATCGTGTTTGTAGATTTGTAGAGGATGTGAATAGTGGAATTGATCTCTCATTCTT  
GCTACGTATCCCATTCAAAGGTGTGAGGAAGATAGCACTGGAATTGAAGGCAACAATTCAATAACTAATTTA  
GGAATTCGTGACCAATTGCTTTGACTATTATTTAGATAAGTGGTGATTGAAGAAATTTTTGTTAGTGTTTCTTTT  
TTT

>TCONS\_00021472

AGTTGTCCATAATCATTGAGCCCACTGGCATAAACACGGCCATTTTCTGTAAGGAAGAGAGTATGAGCACCG  
CCACAAGCAATCTCACGGAGGTTTTGATTATCGAAAACGGAAGGAAACAGAACCTTAGGGCGCCACTGCGA  
CTCAAGACTCCCATGCCCTAGCCTTCCGTAATCCCCGTTTCCCCAAAGGGCTGCGAATCGC

>TCONS\_00021689

ATAGAACCTTTTGATATTTTCATATCCACTTTGATTTGATTTTCAGTCCTTGAACCTGGATCTCCTAAGCTGAGTAGT  
GTGGATATGGAGAGGATGCTAATATCTGGATCCCAAACCATGACCAGCAGCATTGCAGCAGTTCCATATGCA  
ATTGTCGCAAACGGTAGGCGAATAATGTGCTTCAGCTTCTGGCTGAAAACACAGTAACCTGCAACCGTATTT  
TCTGGACTTGGTATACCAGATATTGCTGAAAAATGCCCGTGATAACTAAGAGGGCAACATTACAACCTGCAAA  
GAAGTTGGAATACTAATCCCCGATCAGGTGAAATATCCATGTAGCCCCACAGCCAAAACAGCAAAACCT  
GCTTGCCAATAAGATACAGTAGAAAACACTCCCAATCAGGCTTGCAGGCTTCTATTACCAAAAAGTGGTGC

CTCATCCAGTATGTCCAGGAACAAATTGTTTTCGTTTTCTAGATAGAAGAAGAGTGTCTTTCTCCTGACATTT  
TCTTCTTCTT

>TCONS\_00021751

AAAAGTACAAGCCTTGTCATCTGATGCTGCATTTGGAAGGACTGTTATTCTGCTATCTTGCATGGGCTTTACAC  
TGCCAAAGTCCGCAACTTTAATATGTCCATCTGCAGTAAGTAGCAGGTTCTCGGGCTTAATATCTCGATGAAT  
CAATCCCATGCTGTGTATATATTCAAGAGCATCTGCTACTTCAGCTGCATAAAAACGCGCCTCCTCCTCAGAC  
AAAC

>TCONS\_00021752

ATGCTACCAGCTTCAGAAGAGGATGTTGCACCACCATTTCATCATTAGTTCTAGCTGATCCATCCCCAATAT  
GTGATGGATTCCATGAAGAATCTTGATCTTCACCACTGCTACGAGTAGAGTGGGCTTTTGGCTCTGCAGCAAG  
ACATGGAGGAGTTTGAGACCTTAAACTATCCCAATCAACCTCCCTAAAGAAAGGATGGTTCTTCAGTGAAGC  
GTAACCATCAGGTCCA

>TCONS\_00021813

CCTTAAGATTAATATTCCCTTCACACCTCATTTTAAAAGTCACAAGCGGATAAAGCATGTTGCCCAATCCCTTT  
CGGACATCCGATAGAATTGGAACAATATAGAGAACGCTAGCATGGTCCATGCACGAGAATGGGCACGCAGA  
AACTGAGAGACGTGTTGCTCCAAAATGAGATTGTGATACAGAAAATATTTCTCAATAATCTGAGTTATTATA  
AATTTACTGCAGCACCTTAAACAAAATATAGGATGCTTGACAGGTTTATGATGAGAACATCTTCTCTATTGA  
TCAGGCAGTCCGCAGAGGAGGAGACACCAGTATTACACCATCCCCACGAACAAATAGGAAAGGGATGGTCC  
GTCTTGTAGTCCGAACCTATCTCCTCATATGTTTCATCATCAATCTCAATTGTGGTCACAATTTCTTCAACATCAC  
CAAGAATCATATTAAGATGCTGGTCATAAGCGTGAAGTTTGCCACGGAGTTCTCGGTCTGAACGGAGTTTGAC  
GTAGATTCTCTCATCAAGGCTGAGTCTGATGAGATCCAACGGCTCTTTCAGTGTGCTCTCTTCTTCACTTCCCA  
TGGCTGTTGTC

>TCONS\_00021901

TACAAAGCATTCAAGAAGTCTATTTGCACTTTGCAACAAAAATTAGTGAGGTTGAACTACTATATCTAGGTAA  
TCTTTGAGCTATGTCATGGTTCATCTTCATGAGCTTTTTCGGCAGCTTCTATCTCCGAATCAAGCTTGTTGACTA  
GCTGCTCGCTTACATGTTTTGCCACAGATATCATGTCAAGTATGACACTAGGGTCTAATCCGGTGCCTCCTCGT  
TTGGTCAACCCACATACTAACCCTTGCTCTATTAACAGATATAGAAACAGCCGAGTTCATTAGGGACTCCTCCT  
CTGAAGTTGCATCGACAATGTAGTGCCTTCCAACCTTTATCAAAGTAACTATGACTGGTATTCCGCTGGTGTC  
AAATTGCAGAAATTCGTCATCACTAACATCCACATCTGCTTGCTCATCGGATGAAGCAGCTTCACGAACCTGA  
ACTCTCGGAATACCCGTATTGCTCAGTGCAGCCTTGATTGCAGCACCTAGTGCGTCCAGCAAATTCCTCGCCAG  
AACTAATGACAAGGCAATCAATATACAGATCCCAACATACTTTTCCTTCTTTGATTGAGAGAGACAACGGAT  
CTATTCCAGCCCCTGCTCCACTTTTACCACCC

>TCONS\_00021902

TACAAAGCATTCAAGAAGTCTATTTGCACTTTGCAACAAAAATTAGTGAGGTTGAACTACTATATCTAGGTAA  
TCTTTGAGCTATGTCATGGTTCATCTTCATGAGCTTTTTCGGCAGCTTCTATCTCCGAATCAAGCTTGTTGACTA  
GCTGCTCGCTTACATGTTTTGCCACAGATATCATGTCAAGTATGACACTAGGGTCTAATCCGGTGCCTCCTCGT  
TTGGTCAACCCACATACTAACCCTTGCTCTATTAACAGATATAGAAACAGCCGAGTTCATTAGGGACTCCTCCT  
CTGAAGTTGCATCGACAATGTAGTGCCTTCCAACCTTTATCAAAGTAACTATGACTGGTATTCCGCTGGTGTC  
AAATTGCAGAAATTCGTCATCACTAACATCCACATCTGCTTGCTCATCGGATGAAGCAGCTTCACGAACCTGA  
ACTCTCGGAATACCCGTATTGCTCAGTGCAGCCTTGATTGCAGCACCTAGTGCGTCCAGCAAATTCCTCGCCAG  
AACTAATGACAAGGCAATCAATATACAGATCCCAACATACTTTTCCTTCTTTGATTGAGAGAGACAACGGAT  
CTATTCCAGCCCCTGCTCCACTTTTACCACCC



>TCONS\_00021960

TTCAATTGTGTCTTGTAACATTATTCTCACTTCCCTTTCAAGATGTCATAGTACTCCACTGGCTTCTTCCTAT  
ACTCTGCAGAGATTTCTCTATCACAGTAGCTAAACGCAAGATTGTAGCTTCACACCACGGACGACCAATAA  
GCTGCAAGCCTATTGGAAGTCCTTGCTTATCATAACCAATCTAAGCATATTAACCAACAAAAGAGAAAGAAA  
GGTAAATTAGTAAGGTACAGGTAAATTTTGGAACACATGATGTTGATTAACAATTGTGATCCTATATTGGTAG  
CCA

>TCONS\_00022089

GGTTGACAAAACAAGAAATGACAAAGTACCAGCTTAAATGATTTCAGAAAGAGATTCCACTGAAGTGTAAGC  
AAGATAAAGAAGAGAACTCTTGTAAGAACTCGGCGAAGTCCTGGCGAGCTTTATGATACTGAGATGAAACCC  
AATAATAGCTCGCATAAACAGATGGATCAATGTCAGTCATACTGTCAAGTGTAGTCTTCCCTTCATCTAAAAG  
TTTCTGGCACTCTTTTTGATCCCCTTGCTCAAGCTTAAACAGGGCAATCTGCATCTTAATATAAAGAATCGGCT  
CCTCTATCCGTGTCTCTTATAGTATTACGAAGTTTCTCAGTCACCTTCAAGGTAACCTACAGCAGCCTCTTTCT  
CAGGGTATTGCCGAGAAACAATGACCGCAAAATGTGCAAGCTTGAGAAGATTGATCTTTGTCTCAAAATCAG  
TGATGAAGTTGTCATACTGTATTAGTGTGTCACCAGCCTGAAAAAGGGGAAGTGAAACGAACTGGTCAA  
GCTTGAGAGTAAGCTGGTGCCAGAGCTTTCTTTGGTACAGATCTGATAGCGTAGTGTACCAATCGGAAAGCTC  
TGGATTGGCATTGCAAAGTGATTCCAAATACCGTAGAGCCGCCA

>TCONS\_00022178

TGCCCCGCCAAGATACGGGACAGATTACCTCAAAGCTGGTGAAGGATAGACCAGAAAGAAAGAATCAAATC  
ATCATAGCCCATTATTAGCAGCATTTAAAGTGGCTACCTTGTGTCATTTCTACCTTGTCTAAATACAAGGGGT  
CATAAAATCGGCTATTTGTGCAACTCAACTGCTGTAGCAGCAGATTAGTCAGCAAGTCAACTGCAGAGACAA  
AATATTTTAGGCTCAGATCTTGTTCAAGTCTCATTAGTCTTTCAACACCGTGATGGCTGCAAACTTTTCAGCAT  
GTTACCATAAACGCTAACCAGGTCGCCCTGCCAAGCTACGGCGCAAATTATCTGAATGCTTCATTGCATTTTC  
TAAGAAGAATTCATCATAGCCCCATCATTTATTTATTTATCTATCATTTTCTCCACACAACCTTC

>TCONS\_00022366

ACAATCAAGAGTACTGATAGAACGATAAACTCTTGTCATCAGAGACACTTGCAAGCATACAAGACCGAACA  
TCAGTCCTTGATGTTGGTCCAAAAGCCACAGCCCAAACCTGATCTGTATGGTTGGTCAAAGTCTGTGTAGCCG  
CTCTCATTTTAAGATCCACAGCCTAACCGTCTTGTCATTGATCCTGTTGCAATTGCTGCCCCGTCTGGGGAG  
ACATCAAACTCAGAACCCAACTTGAATGACCCGACAAAGATGTTAGCAAGGTTTTACCCTCAGCATCATAT  
ACATGTACATGACCATCATCTGATGCTGAGAAGAGTATCCTTGAATCATGAAGCGAAGGTGAAAACACGAG  
AGATCGCACAGGCATGCTATGGCCTTCTAAGAAGTGAAGGAATTTGGCACGTGCTACGTCGAAAACAGAGAT  
AGTCCCGTCAACTGAACCACAAGCAAGAAGTCTACCATCAGGATTCCATGCAACTGAAAGGACAAATTTCTT  
GTTGCTGCTTTTCTCAGATGGTTGTGGGGCGGCTCCTTGACGAGGAATTGACAATGTGGTAATAAGTTGCCAC  
TGAGTAGTATCCCATAGCTTGACCGATGAACTACCACCACCAGCTGCTGCCAGAGTGCTCAAACACTCTAAT  
AAAGCTATCTATAGAAGC

>TCONS\_00022385

TCAGCTTGACGCATCTCTACTCTGTAATTTTCGCGGCTTCTGACCACATATTTACTTGACAAAACATTGAGCTT  
TTAAATGCAAGAGAAATGAGGCCAGTAATTACTTGAGATGCTCTTCAGGTGAAGAACCTAGGTCTTCCTTGC  
ATTGTGGGCAGCACTTAGTTTCTTGAAGTCTTGATAGATGCACCTTTTGCAAACTGCAAGCAAGGAGGAATT  
GTTGTAAGTCAGATAAATAAGTTAACAATTTTCATGTTCTTTCTTGATTTCTAGATGGACAAGAATCAATCATGA  
GGCTAATATTGATGAGAATCATAAAATTGAGTAAACAAGCTAACTGTTTTCTTTCATAAAGTAAACCAGCTAA  
TTACCAATCTCAATAAACAACATATAACAACAAAAGAAAGATAATGTCCACCTCAATAAATGAAAATACA  
AACATTGATAGCTGAAGAGATGCACTTCTGATTTGATAACTAGATATTTTCTTAGAAGAGGGGAAGCATTCTGG

AAAAGGATCAACTTACACCCCTCCGAGTCTTAGTGTCCAAATCATGAGAATAATACTGCCACTTCTTTTAGTTT  
 AAAGAGCTCTTGCCCCGGAAGTCTTATACTTCTGTAAAGTAAAGACAATTATAAGTTTATAATTCAAGTTTG  
 ATAGCCTATAATATATTTTTGACACTCATCTACCTTGAAGTGTACTTTGCTAGTTGGTTTGTGGTGCTAAACAT  
 GCCCATGGACATGTTAAGTATCTGAAGTTCCGTCTGGTTAAAAAGAAGTAGCTGAGCTTTTCGTATTGATAAT  
 TCTATTAATTGTGTAATAGGATTGGTGGGAAGAGCCGCAGCTATTTCTTGTACTTTTTGTGTACCATCTCGATAC  
 CATTTTAGTAAACCCTTCCCTTACAAAAAAGGTATTTCTATTAATTGTGCTACTGTTTTATTATGGTAATAATAT  
 CAAAAGTGAGAAGAGTATAGACCCGGTCACACAACATACGTAAATGTCTATTTACGTGTGCATGCATTGCAA  
 ATGCAAAAAACACAGAGAAGCAACTCATTGAAGCTTACATGTGTGAAGGCAAAGGTTTACAGTGGTGGCTTC  
 TTCAAACAGTTTACTGCATAGCATACAACATAAAGCTGCATAAATCTCCTTGAGCTTGCAACCCATTGATCTA  
 TCTGCTTTGACTGATCTCCAGAGTCTTTCACCTTCAGATCTTTGGTCACCCTTTGCCGTATCCATTAGAGAAGTT  
 TTGTGTCCTCTGTTTGCCTGCACTATGAGGTTATTTCTAACTTCTGAAATTATGACATAGATTACTTATAGACTA  
 GATTAGACAAGTTAGTCTTAATAACACGAAGAGCTGCAAGAGAAACCATAGATACATAGAAGTATTCAACA  
 CAAAAGACACAAACATCCGAAAATTCTGTGGCCTTCGTTATGTGTTATGATGCATTGACTGTATGGATTAATG  
 CGATGAACATATAGATTATCAGTTGACAAGGATACTTATTTTCTCAGATATCAGAACAATGATTATCTCAATA  
 TGGAAAAATGTGTGGTTCCTTGCCCTTGATTCATACTTGTGTACCTATATATGAGAAGTGGAGTATGACCGGG  
 CAATTGTTAGGAACACTATTTTGAATTTTTGTGAGAGGACTAAAACATAACTGTAGTTGAAACAATTCTAGAT  
 GGAATATAGGAAGGATTTATTTTTGAAAAATATTATATGATAAAATTGTTTCGGCATCAGCTGTACCATCTCA  
 TAACCCCTTTTAAAATCATTGTTTAAAGTCCCAATTGAGAAAGAAGAAAAAAGTCATCATTGAATATCCTGGT  
 ATCTAGTGGCTCTCATATGGCCCACTGGATAGGTCTACTCCTAGGGTATTTATAAGTTTGCCATTTTCATGTTGG  
 TGGATTAAAGGATTCAGGTTGTACAAGCACTAAGTATAACCTGGAATGAGCAAGTGGTATAACATCTATTCA  
 GTTGGACAAGCTTACAGATCTTTCACACCTCAAATTGGATTTAGTACTAAGCTGCATCGAGTTATGAATAATG  
 TATTCCTGTTTTGTATGTCCGATCTAGTATGGACCAAGCTTTTGGATTCTACTCTTTAATTGATTTAGTTCTAA  
 GCACATCTTGTAATAAGGGGACGC

>TCONS\_00022399

ATTGGGCTGAAAAATCTATCACCGAAATACAAAAACAATCATGGGTTTGCAATCAAACCCAAGAAATATATG  
 GATTCTTCGTCCTAAATTTACATTTCTAGTCCTTTTACTTCTCATCACTTCCCCTTTGATCTCTACTCAGGAAGCT  
 GGGGATGAAAATGAAAGAGTGGAGTCAGGTGGACGGTTCAAAGATCTGGGAAGGCGTAGTAAAGTGAGTCT  
 ACTAATCTTTAGCTGC

>TCONS\_00022412

CTTCATCAAATAGTTCCAAATTTATTTCAACTTACAAATATCTTTCTTAACCTTATTACAGATTCTTGATATTTA  
 GTTTTTTGCTACCGGAAAACAAAATGGGGTTATCGGAGATTGTAGATTCCGGCAAGGTCACCGGCCAGAAGT  
 CTCAGTTTTCTCAGACTTGTAATCTTTTGAGTCAATTCTTGAAGAAAAAAGGTTCTTTTGAGATCTTAATAAT  
 CTTGGTATTTACCGCAGTTTTGAACCAACTGGTATGTTCTTTATATCCATTTATTTAAATCAATAGCTGTTTTCT  
 GTTATCATTTGCTAGAT

>TCONS\_00022553

TAAAATGCAAGGGAAAGAAGGCTTTGCAATACCATATGAAACTAATATCATCAGCTTCACCAGAAATTTTAG  
 AAGTTGTTACAAACCAGCACATTATTTCTAAGGCTCAAAGCCTACAAGACATTTACTATATTTATATCCAAA  
 TACGACCTCCACGAAGAGCTCTAAAAAGCACAAAAGCCTCCTGAAGAAAGAAACAGCCTGACTACCATAAC  
 TTAAAAGCACACCATTACAAGGTGCAGATGAAGAAGCCAAAGTACATAGCAAATCAAATCACCAAACCAG  
 ACTTCTAAATGTCTGCATTCAGCAAGAACCACTAAAAGCAACTGCACCAAGCTGTCAAAACACCTCAGTAGT  
 ATGAATGCATCCCCTGGTACATACCCCCAGGTGCAACTCTAGGTGCAGGTGATACCCCGGGCACTTGGTTTTG  
 TTGACTGTAATGAGGACCCTGTGGTGGATAATCTCCTGAAGCCAACCCAGTTGAGCTTGGGGGTAACCCATA

CATTGAAGAGCCACGGCCTGCACCACCTAATGCACCACCAACTCCACTTAAGCCACCACCTCCCAGCGCCCC  
AGTGCTGCCATATCCACCACCTCCCAATGCCCCAGGACCGCCATATCCACCACCGCCACCAGTAGCACTACT  
GGCCAACGCGCCATATCCAGCTGAACCAGCCCCACCATAATGAGACCCCCACCTCCACCATATGGACCGCC  
ATACCCACCACCACTAACAGAACCCCCAGGTTGGCTCCCACCATAAGATGAACCACCACCGGGACCACCCA  
CACCTATACCATTCCCCTACCGTATGCTGAATTGAGCCCATGTCCGCCGGGGCCACCAAAGGTTGAATGCCC  
TGGAAATCCACCATAACCAGTAATCCCCTAGGCCCACCATACTGGCCCGGGCCAACCTGATCAACATGACC  
ATCAGTTTGAACCTGAGCTCCTCCTCCAGGTTTTCCCCCTTTCTTCCCATCAATAGCTAGCTTACAATTCAACT  
GATGCCCATCAATATTCTTAACAGGATCCACTAGCGAAGCCTTAGCCGCCTCCGCCGTCTTATACACAAACAA  
AGCATACCTTTTTGACTTCCCAGTCGCCTTATCAAACCCTAATGGCCCTTCTCTATTTCCCCATACATACAAA  
AATGCTGTAAATCCTCTCGGCCTGCATATCATACGGCACATTTCGCTACATAAATCTTCTCGCCGACACATC  
AACCGGATTATTGGTACTCCCGCCGCCAGGCCCACCTTGAATCCCAGCTGACGCGAGCTGAGTCACTGCCATT  
CGTCCATCAATCTTCTTACTCGGCTCCTTCAAAGCAAGTAAAGCTCCATCAACATGTTTAAACGTAACGAACC  
CGTAACCTTTTGCTTTTACCAGTGGCTTTATCGGTAATTACAACGGCTTCTTCTAACTCGCCGTAATTACCAAAA  
ATCGCTTTAAGTTTTTCTGTATTCTGTTTCCCAGCCGAGTCCGCGAATGAAGAGCTTCCGTTGAGTGGTGTGCGG  
ATCGGCAATTGCTCGTACTTGGTCTAAAACGTCGGCGTGACGTACAACAGCGGTTTGTAGGATTTGAGCATT  
TGTTACGGGGTGACTGATTCTAGAATCTTCCGTGCGTCTTCGATGGTGAGTCTACTGGTAACGGGGACGTCGG  
TGATAACGCCGTTATCCTCGAGCTTTCGTTTCTTCAAAGGTCCATCTCTTTTTTACAGTGAAGAGATT

>TCONS\_00022597

CACCAATCGAGCTTTGTATCTGACCAGCTTGCCATTTCCATCTTTCTTGAGTTTAAAGACCCATTTGCATTTGA  
GTGGTCTTTTACTTTTTGGAAGTTCAACCAGCTTGACGTGCCATTTTTCTATAAAGATTCCATCTCTTCTTGCA  
TGGCTTTTCACTGCTTCTTTTCTGGATGGGACAGCACCTCCTTAAGACTTTTCTGGCTCCCCCTCATCACTG  
ATGAGGACATACTCTGTGGAAGGGTACCTGCATGACTCTACCCTTGGCCTTTCTGATCTCCTCAGAGGTTGAG  
GTTGTTCTTCTCCCCGAGTGGGGTACTCCACT

>TCONS\_00022657

GTAATTGATGGATTATAATAAGCAGCGGAAGCAATCCCAGTATCAAAATCACATGTAATCTAGACAACCTAGC  
ATAAACGAGATTTACAGGGTTACCTCTTGAAGCGTGAACATATCTCTTCTACCACGTGAGCCTTCAGTTCCAT  
AACTTCTCAATGGAATCTCCATCACCCGCACAATCGTGATCCTCGAACGTTCCACGGTCTTCTACTGTGTTACC  
CAAATAATACCGGAAATAGCAATTTCTGTGTTGGGCGAAATTTCTAGGAAAACCTGGCTGAAAATTTACGCCAC  
CATCTAC

>TCONS\_00022704

ACATCTTGACACATCCAGATTATTGTTAGAGATACTGTTGGATCCTCCAAGACCAATGAGCCTTAACCATTG  
AATCTGGTCGAGATATTTTCGGAAAATCACATAAAAACAGGAATAATAAAGGAAAACCTTCTCCAGAACAGA  
ACGAATAGACAACAGAAACAGAGGGGCTAATAAAGTAAGCCTTCATACATCATTAGAGTCCACCAGAGAGTT  
ATAGGAGCCACACAGCTTAGGAACTTTGCAAAATCCAAAATTCAAACAGATAGGAAAACCTATAATCAACA  
GTAGAGAGTAGACACTAATGATTGTCCATGTTGATCAGTAGCTTAGTTTAGGGATCTAATGTGCAGTGCGCAA  
TATTCCATGCAGATAACCACCAGTCATAACAAGAGACACAAAGGAGACAATACCAGCTGGAAAAACCTTCT  
TTGACTTCAGAAACCTAGATCCCATTACTCCCAGAAGTGCAGCCGAGAGGACGAAACCCATTGATGATGCCA  
AAACAGGTTGTGTTGGAAGCATAGCATAAACAGAGTACAAAAGGGAGGCAGAACTCCACCTGCAATTAGG  
GACTTCGTGCTGCCACTTTTCAGATAAACCATAAAAACCACCAGCTCCAACCAAGAAAGCATAGCCCAATGTC  
AATTTTTGGGACATAGAAAGGGCCATTTCTTTTTATTGTTATGATCCTTGCCTTCATCTGACTCCCCCTCGTTG  
CCACCATCATTATTATTATTATTGCCACCATTATTTCCCTCCCCACCACCGCCATTTGCACTCACAGAATC  
ATCTCCACCACCACCACCTGTCTCTGGCAGAATATCAATTCCTGGCCCTGCTGAATCAACAGTGAAGGTGGTT

GGCATTGTAGAATCAGAGACAACACTGGCTTTGACTCCCCAGTAGGAAGGCTTTGATCGAGTGGACAAGTTT  
GGGTACACCGTGCAAGGGGTATTCAATGGATGTAGAGATGAACGAAGTGACCTCAATGGCTGACTATGAGC  
AAAGAAATGCTGCCTTTGACTCCAAGCTTGGACGCGAAAGTGAGGCAGCACTATGGAGGATTGAGCAATGG  
CCAAAAATTCTCCCATGATGTATATGCTGAATTATGAGAAAGTTATTTACGGGATGGTTTGTCTGTAGCTT  
GTGTATTCTCAGCAACTTCCACAAAAATCAGTCTTCCATCAACAATCCTTCCGTTAATGGAATTCAATGCATTC  
CGAGCATCTGCTTCTGACTCAAAGGTAACAAATCCAAAACCTTTAGGCCTTTGCGTTCCTGGGTCTTTAACAA  
GCCTCGCTGC

>TCONS\_00022705

ACATCTTGTACACATCCAGATTATTGTTAGAGATACTGTTGGATCCTCCAAGACCAATGAGCCTTAACCATTG  
AATCTGGTCGAGATATTTTCGGAATAACACATAAAAAACAGGAATAATAAAGGAAAACCTTCTCCAGAACAGA  
ACGAATAGACAACAGAAACAGAGGGCTAATAAAGTAAGCCTTCATACATCATTAGAGTCCACCAGAGAGTT  
ATAGGAGCCACACAGCTTAGGAACTTTGCAAAATCCAAAATTCAAACAGATAGGAAAACCTATAATCAACA  
GTAGAGAGTAGACACTAATGATTGTCCATGTTGATCAGTAGCTTAGTTTAGGGATCTAATGTGCAGTGCGCAA  
TATTCCATGCAGATAACCACCAGTCATAACAAGAGACACAAAGGAGACAATACCAGCTGGAAAAACCTTCT  
TTGACTTCAGAAACCTAGATCCCATTACTCCCAGAAGTGCAGCCGAGAGGACGAAACCCATTGATGATGCCA  
AAACAGGTTGTGTTGGAAGCATAGCATAAACAGAGTACAAAAGGGAGGCAGAACTCCACCTGCAATTAGG  
GACTTCGTGCTGCCACTTTTCAGATAAACCATAAAAACCACCAGCTCCAACCAAGAAAGCATAGCCCAATGTC  
AATTTTTGGGACATAGAAAGGGCCATTTTCTTTTTATTGTTATGATCCTTGCCTTCATCTGACTCCCCCTCGTTG  
CCACCATCATTATTATTATTATTATTGCCACCATTATTTCCCTCCCCACCACCGCCATTTGCACTCACAGAATC  
ATCTCCACCACCACCACCTGTCTCTGGCAGAATATCAATTCTTGGCCCTGCTGAATCAACAGTGAAGGTGGTT  
GGCATTGTAGAATCAGAGACAACACTGGCTTTGACTCCCCAGTAGGAAGGCTTTGATCGAGTGGACAAGTTT  
GGGTACACCGTGCAAGGGGTATTCAATGGATGTAGAGATGAACGAAGTGACCTCAATGGCTGACTATGAGC  
AAAGAAATGCTGCCTTTGACTCCAAGCTTGGACGCGAAAGTGAGGCAGCACTATGGAGGATTGAGCAATGG  
CCAAAAATTCTCCCATGATGTATATGCTGAATTATGAGAAAGTTATTTACGGGATGGTTTGTCTGTAGCTT  
GTGTATTCTCAGCAACTTCCACAAAAATCAGTCTTCCATCAACAATCTTCTGTAACAACGCCAAAAGGTGAA  
AAGAGCTTCTTCAATCTTTTATTTCGTAGTGTAACGATAATCCTTAGTGCAATGCTCTGCCGGAAAAAGATA  
TAGAAAACCTGAGTCTTGACGGGCTCAGTCGTGGGGGCGTGACCGCGTGAGTCGTGAGGCGGAGAACTGGCG  
AGGGCTTGACTGCTTGAGCCGTGTGGCCGGTGGCGGACTGGCAGAGAACTGGTGAGGTCTGACTTCTGAGGG  
TGAGGACTGAGGGTGAGGAACTGAGTGAGTGAG

>TCONS\_00023029

AGAGGCTAATAAATCAGGCTTCTATAGCAGGAATACCACCTTCGATGTTGATCATATAATCAAAGGCAAAAA  
GCTTATGAAGTGATGATGCCTGCCAAAACATCACTCTTGCCCCTTGACCTATTGTGTAAACCAAACGAATCG  
CATCAAGCCACCAGTCCAAAGATTCCCATGAGTCTGCGATCATGTAAACTGGCCCATGAATCGTATCAATGC  
AGAGGCCTGCACCAGG

>TCONS\_00023030

CTCGTATCTGCTGAATTTGATGAAAGGCTTCCTGACATGTGTCGTTGATCAACTTTACTGATCTGTTGAAGTCC  
TTCATGATTCAAAACAACTGAGAACGCTTCCAGTCACTGTGTGGTGCAAGCGGACTACCAGCAGGTGGTGC  
AGTTAGATATCCAACCTTTAGGTAGGGCAGAGGTAGCATAGATCGCACAAGCTTCAAGGCACTTGTGTAAAC  
CGAGTAATTCCGTTTCAGTGCATGTGCAGCGGCAATGTAAATCGCAGACTGGCTGTACAACCTCATTAGGAGA  
AATCTCTTTAACATTACCAGTCCCCCTGTTCTTGACATGTCTCTGCTAATCCATACAGAACAGTTCCAAGGT  
TGTAGATTGCCCTATGGAAATCAAATTGCAGTTGGATCGCTGCACGAACTTACTAATTGCCGTTTTGACAAT  
TGTTAGCTTTTCTCTGGCAGGAACGATTGCACTGAGTT

>TCONS\_00023032

CCTGCAGGGCAAGTCCCCAGTTGTTCAATGCCTGTGGACTGTTCCAATTGAGTTGGACAGCCTTTTCATAGTTC  
TTTGTGCTGCTTCCAAAGTTCTTCAGCTTCTTTGTACGACCCCGGATTTTCGCTCGATCAGATATTGCAATG  
GCCCAATTATAGTAAGCATCATTGAGCGTAGGACAAAGACGGGTTGCCTCCTCATACTTCTTGTCATGCCTCTT  
CCAGCAAATCATCTTTTGAAGGTGAAGTGGAATCTGGGTTTACATTGTCTGCACTTTCCTGGAGAACCAGTGC  
CCAATTATAAAGTGCATCATAATCTTCTGGATTTCGCTCTAGTGCCTAGCATAACCTG

>TCONS\_00023033

ACCTCCGGGCAGCATATGTCAGAATCCGTTGGCGAGATCGGCCCTCCTCGTCAGCACCTGTGACGCTGTAAAT  
CAACTCCAAGGCAGCATTACTGTCTGTCTGCTGCTGATTGCTCTGTTGACTGTGAGGAGTGTGCGCTTCTCGTC  
TTTCGGCTTCAGAATCATCATTAGCATCGCCATTCTTCAATTCATCCAACAACCTCTCTCATTGTAAATGTTTCG  
CTACCTTCATCTTTCTTTAGCTGCTTCAAATTGCT

>TCONS\_00023139

GAACAGAACAGAACTCTGTAGTCCATTCTTAAGAAACAGAAACAATCCTCTCCGACTTAGTTCATTTCTTCT  
CCGTGTTGCTTTCCAATTCCCTTTTGAGCTGAAGAGAGAAGTCATCATTGACATCATCATCATCCCAATCATCT  
TCCCATTGCTGGGTAACCTTCTTTCCCTTCTCTTTTCGCTCCCACTCTTGATCAATTCGAACCTTCAAATTCAT  
CATCATCCTCGAACAGATCCATTTTCACGCTTTCAGTTGCTGGCTTTGGTTGTTCCGTTGCCATTGCTATTTA

>TCONS\_00023289

GTGATGAGCTGGAGTTGGAGCTACCATCTTGAGCATCTGTCTGAACACGGTGAGAAAACTGTGCCCCAAACG  
ATTTCCATAACCTTGAAGAGAAAGAAGGCGGCAACTCTCCCATGTTCCCATCACATGGCATTTCAACTGGCTG  
TGCTGAAGTGTTTTTCAGCTCTGAAAATCTTACAGCTCCTAAAATGCGTTCTGGTAGTTCTGATTGAGTTTGGC  
TCTCAATAAGGAAAGCTAAATCAACAGTAAGAGTTGATAGATAATTAAATGCGAGATGAACAATTGCATTTG  
CTATCACGGAAGATCCAATATCAATATCTACTTCTATGAAGTCATCTGCTATACAGTAGTTACATGTCAGCGC  
ACGGCCAATTACGCATATAGCTTGCTCCCCAACTGCCTTTCTTACAATCCAAGGTCCTTTAACAACATTTGCTA  
TCAATTTAAGCCTTCTAGTTCTAAATGCATCATCCCCTTTCAAGAAGTCTCCATTAAAGACCCTTCGGGGAC  
AGGCTCAAGACCCACAAAATATGCAACGGCACTATAATTTTCCTTACTAGGAAGTTGCAAGTTGAAAGCCCA  
AACAAAGGGTTTGCAACCAGTTGGATTTTCCTCTTGAAGAGCCCTGCTGATACGGTGTGTTGGACTATTCAGG  
AGACCAGAAATCTTTTTGGGACCATGAACTATTCCCTGGTGGAGAAGCCCAACCATTGAGCAGTTATCTGG  
TTCCAGAAGAGGAACGGCACCTTCTGATTTACCCTCTTTATCCATTGAGGTTTCATCATCACCATCAAGATTGG  
CCATATGCAACGAAAACCTATCTGTACG

>TCONS\_00023307

CTGGACTTGATTACATCAAAATCTAAGCAGTCTAGCAAGTCCAGCAAGTTATGTTAAACGATGACTTCCAAC  
GAATAGCAGTAAAATTAGGTGAACATATTGATATTCATAGGGACACATGTACCAAGCAGTTGAGTAGCTAAG  
AAAATAGAATAGAAATCCACTATCAGAAATCAAAGTGTGAAGAATTTATACAGAATAGAAGGTGAAGCAC  
AGGTGAGAACTGCAAATTATGAACTATCAAGATTCTGAGGCATGTCTCATTCTTGTCTGCTAGTGAATG  
TCTTCTAGGTATCTCCTTTGGTTCTGCCCTCTCTATTTTATTATAAAGATTCCTGAGATACTCTAATGCTTATCCT  
CCTTAGGAATGTCTTTGTGAGGTATCTCCTTTGCTTTTGCCTTCTCCAATTCCTTGGCGGCGGAGGAAGACTCTT  
CCTCGAGCCAATGGCGAATTTGACGGACGTTACGCTTGAAGATGGATGCAGACTGTTTGACATCGCTCCTCAG  
CAATAATATAGCCGCGCTCACTCCGACCACCGTTAGTATAAAGTTCGTTAACGCCATT

>TCONS\_00023349

CTGCTACGGAGAACAACCTAGGATATAGTATTATCTGTGGTCTTCTGCCAACTGTAGCCATTGAACTCTATTTTT  
TCTGTATTTGCTTTAGAAGCCCAGAGACAGAAGCACAAATGTGTTGATTTGTATTACATTGCTCACAACAGTA

CTTTAGTGCTTCGATCACCTTTACACACCTTTGAGAAAGGAAATTGTTCTTGAAAGGCAAGCTTGAATGTGCG  
CAAGCCTGTTTCTTACATGGCTCTTTACTCGGC

>TCONS\_00023432

CTTTGGAGCCAATAGCTAGGGCATCAAGCAACTTCTTTTCATACAATTACTCGAAAATTGACCTCGCTATATA  
AAGAGGTCAGAGCCATGACATCCATGGAGTATTAGACATTTAGACTCAAGGAAACCATGCTGAATTTACAAA  
TAGCAAAAAGTAAATGAAAGTCCAAAATCAAGCTCGCGCGTCCAACATCATGCTCCTTGTCCACAAAGACAC  
AACTGTTGAATTTCAACAGTTGATTTTACCAAAAAAATCAAACCTTCTTCCACAATCCAGCTGACAAGAAATCA  
TTTCCCGTGTTTCATCATCAATGTGATATTATCTCCTTTCAGAAGAATCCGCCCCAGCTGCTTTCTGCTTTTCTT  
CTTCACATTGACTTCCTCAGCATCATCTAGAACCAAATTCATGTACTCATCAAAGCCAATAATACGTCCTTCA  
ATCCTCAGATCCTTCTGCTCAAATAGCCATATCTGAATACGAGCTTTACTCTGAAGAAACCTGAAGATCAGGT  
TAATGGGTTGGGTCATAATCCTCTGTACTTTGGTGCTAGCCATGGCTGCTACTCCTGTTTCTCTCACGAGTCACT  
CTTCCTCTCTGATCTCACGGAATGAAGCAAAAACCTAGTTAGGAGAT

>TCONS\_00023461

AACTTATTCAACTCTTTTGTGGTTACACCACCTACTCTTGCATAGTATGCATTGTTATAGAATGCATCATCAAT  
GAATTTTGTGCCACCATCACACTTGTGATTAGTAGTCGGTGAACATTGAGGGAAGTTAAATGAGCACTAGTG  
TGTTCAATGAATCGCTCCATGTAAATGTGTGCAACCACAAAGCATGAAGGGCTGCAACATGAATACTTAAAA  
ATGCGATCCAAGTATTGTTTCGATGCCGAGCGACGGGGTCCTTGATCCATGAAATAATGTAATCACATCTTTTC  
TTTGAGTACTTTCTAATAAGCTTTCGGTTTTTTGAACAGACCTCTCAAGAAGTGTTGAAAGAAGCGATAGAAC  
TCTGGGTTTTCTGATTTTTGTCTGCCAGACACCTTCAGCCCCAATGCTAAGTATTTTTCTGAGCGTATGACCTC  
AGATTCAGGTGCCAAAGTTCCC

>TCONS\_00023512

AATAAACTACAAACACAAAATAGAGCTTGTTGTCTATATGTTTTCACTACTAGAAGGCTGAAAGGCATCTAG  
GATTTTCAGATCATAGTAAACACATGAATAGAGAAAAATTTATGTGACACGAGCTGTTCAAGTGGCAAAGAG  
TTGAGCAAAATTATGAACTATCATATAATCCAAACAGCTAGCAGCAGGCTTAGCATAGCTGTATCATGCCTTC  
TTCTTTTTGGACTTGAGCATCACATATCCGATAAACATGCTCAGCAAGCAGATGAGTGCCATTCCAGCAAATA  
CGGGAATAAGAATCGCATACTCTTGAGGTAGAAAATATTTGTGCACAAAATGATCAGTATCAACCAGTGGCA  
GAATGATGACCCAGAAGGTATAATATGTGAAAATAGACAACTAGTCACTGTCAAAAGCAGCCCAATCGTT  
CTGTCTGCTAATTCCATCGTGACTCGTTCGCTTGTGCAGACTATAATCACTGGACATCAGCATACAGCTGTAA  
AATAAAT

>TCONS\_00023526

AAAAACACACAAAAATAACTCTTCAGCAGACCACCCCTGAAGCCGCCGACCACCCTTCACCCATCGAAAGC  
CCTCGGTTCTTCATCTTCTTCAACACTAGAAGAACCAGACGATCCCAGCCCGCCACTATCAGACCTCGCCTCC  
GTTCCCAACCCTAACGCCACTGTCTCACCAGGCAAACGACCCTCCCCACGCCGGAAAACACCCATAGCTGACC  
CTTCTCCACCTTCTTCTCCAACCAGATCAATAAACACAGTAACGCAGCCAGGAAGACCAACCTAGTCAGCCC  
GCCTCTACACTGTGTTACCCAGTCAAGTTCTGTCTATCTCGAGTTTTCTGGTCGAGCTTCGATAACTGAGTTTC  
GA

>TCONS\_00023559

ACAAAATTTACTGGGTGTGAATATACAATAGATACAGAAAGAGCAAAAACCTCTGCTCAAAAACCTCCATTAA  
GAAGTCCAAATTTATTGTTTTCAATTCGTTCATCCAGTAAACCAAAATGAGAAACATGCATACCGAGGCAACTA  
ATGAAAGAATGATAGTATCCATAGACTTTTTCTTCTTTATTGCAGAAAGAATATGATTAACCTGTTGGAAGGCG  
ACTGCTGACATTGCTCAACTTTGAATTAATGCCACCAAATGTTGATCTTTGAAACATAAGTGTCTTTATTGTTT  
CTTGAGCTTGAGAAATCACACCATCCATCTGTCCAGTACTCCTATGGAGGGAAGCACGTTCAATTAAGGAGTGC

TGCTCATGAGACCCACTACCATCTTCCAGATCTAACCTGGTCCGATCGAACTCCCTAAAATCTTCAAGCAATG  
ACGCATGCTCTTTCTTAGCTCTGTAACCTGAACGGAGCCGATTAAACTCCTGAAAAAGATCTTGAAGAATTTCT  
TTGATGCCGAGTCAGCGTATGAGAAAAGATCTCAGATCCTCCAGATGAAACCCATGCTTGCATTTGCCAATTT  
ACTTGTTGAAGCTGCTTGAGCAGCTGATCTATACTGGGTCAAGGTCGTTATCATTAGCATTACCAGTTTTGTT  
TGAAACGAACTTACGATATATATGCATCTGCTCATCCAGCTGAGCTTCAAGCTTCCTTGCCTAGTTGGATGTGT  
AAACCAGCATAAGGAAATTTTATTTATTAATAATATATGAGGAAGAAAAAGAAACAATTACAGATGAGATTTCT  
AAGAAAAAATTCACCACATGACCAACAAGTCAATTTTCTATGTGAACCTAAGCTGAATCAAGCAAATTGAA  
AGAGGATCAACTAAAATTTACCCCTGCCACATGCAAACAATTTGTCATGATTCTCGCCATTTCCACACCCTTA  
GAGAACTCTCAGGTAATCTTATCATAAGTTCAAATGAAC

>TCONS\_00023793

GAAGAGGAAGGGCAAAAAGAGAGACCTAAAATAAATGAAAACATGTTAGAGTTCTTCCGGGTTTGCATCTA  
AACAGTTCCAAAAAACTGCTCCAAAGAGGTTGAGCTGAAGACATTCATAGCTGCTCTTTCTGGCTTGGTAGGT  
GAAATGTGTAGCTCATATTTGATAAATCTCGCCAATTGAAAAATGATTTCCGGATTTGTATCTATATGCCAATC  
AGGTTCCAGTTGTCGGACAAATGATGTTTCGCCATTCTCAGTGCTACAAAAGAGAACCTTGTCTTTGACCATG  
CTTAACACTCCAGCATCTTCTAAAGCCACCAAGATGTTTTTTTCACTTTCTTCATCATGTACTCTCTCCATGAGA  
TAAAGGTCACAAAATTTGGTGATTTCAAGCAACACTTCCAGCACGGAGGATCGGATAGTTGCTTGTCTGTGA  
GTTCTCTGGGCTAGTTTCTCCAGGATTACTCCAAGCAACCGACATGTTACCTTCTCCCTCACTCAGTCTC  
TGCCTAACTATTTGCCCGAGTGTCGGCTTTACTGGCTGAAAGAACTCATCAATAACATTTTGTGTACTTGAATC  
CTCTGAAGAAGGGCTAACTCCTGAAGTTGCTACATTTGCACTTAAATGACTGTTTACACCAGAACTACCAGGT  
GTAACAGCTTGTGCTTAGGACGCCTCCTCTGTGGTCCACTAGGTGATCTCAATATTCTCCATGTAAAAACTAT  
TGCAAATGCAAGACCTGCTATAGCTCCTACAGATCTCGAATCCAGGTTTTGGAAGAGATTAGAACTTTGAG  
GGTGAGAAAAGCCCCAAATCGCTTCATGAGCTGGAAGAAATCGTCCTTGAATTATCGGCCATAACTTGCTG  
AAGACTTCAAAAATTGATATAGAATTCAATGATTCGACGTGGTAGTAAGTTGGTTTTGTGGAGAGGATGAACG  
GCTGATCAAGCTCTAGGGTTCATCTTCATTGCTCTCTACTCTTCTAGAATCTTCTAGATTGAGAGAAAGTAGAA  
ATGGATCTTGCAGAGGAAGCTTCGAT

>TCONS\_00023840

ACAATAGAAAGAAGATCCTTTGCAAACCTCTTCTCATACAGCGGGGAACCAACTTTTGCATCAAGAATTACTC  
GCCGGACAGAACCTGATATCAACTTTAATGCATCTTCAACTGTTGGAACAGTTAGATCATGATGCTCCGACTT  
AAGCTGATGAACTGCATCAAGCTCTTTAATCTCCTTTGAGCTTAAGTGTGAACTTTAGAATTGTTGTTCCAG  
TTATCCGTTGCAAATCCCGGTCATGGAGGGGCAACAACACACCATCTGAAGAACGAGAAACATCAATCTCA  
ATGCAGTCAGCCAGAGAATCAAGAGCAGTTTGGTATGCAGCCAT

>TCONS\_00023841

GGGAAAGGCCTTCGATGAATCACCACCATGAGCACAAACCAGAGGATGACTGCGCAGCCAACTACATTTCT  
GTGATTGCATCTGATGGAATCGACGGAGACGAAAATGGAAGTAAATAGGGGGAATAATGGCGATGAGGGCG  
AGGCCAATGAGCAGAGATCTAAACACCTTTCTGGAAGTGAAACTCTGAGCTTTGGCTTAAGCTTTCGGGAC  
AAGAGGCCATGCCTCTCCAACCTGAGTCGACGCTTTTGCCTGTCCATTCTCCACAATGGCACCCACCGATTG  
TCCAATTCAACGGATTCCC

>TCONS\_00023906

TAAAGGTATAGATTGAGTGGGTTGAGACTCATCTGAGCTTTCTGGGGAAGCTGCCTTTTTTAGCTTGTGATTAT  
TATATGCAGCTACACCTGCAATAGCAATAGCATAACCAAAAAGATTAATCAATGTCAATTTTGTATCCGCAA  
AAAGTAGGGCAGATAGCAGCACAACGACCCAATCTTTGACAACCTCCAGCAACACGAATGGTCAGGGCAGTT  
GTATGTTGAATCACCAGAAAAACAGACAGATTCAGGGCAAAGGTACATAGAGAATTTAGGGTTAGAATAAG

AGGATGGAAGCTCCATGTCCTCTGTTTCGTCCATCTTTGGTTTCTCCAAAAAGATCCATGGAATTAACAAACAA  
AGAGCGCTGCATGGGCTGACATAGTACATCACAGATATGGGGTTGAGCTTCAGGCCCTTCCGTTTCACCAGA  
ATCTCCATAAATATAAGCCTCAAAGCTTCTCCAACGAC

>TCONS\_00023907

GCGAACATTGCACCAATTGGTATGACTGAACTCATGTATATATCTAGAGTCATCCCTTCCTCAACTTTCATTAT  
CTTCAGAACCTTGGTAAGCACAAAACACAAAATTGAGGAGAAGACCATGTGAAGTAGAGTCAATCCAAGAG  
GATAAGGAAAGTTTATATCTTTTGAAGACAAAACCCACTTGTTGAAGAAGATCTGGCCACTAGAGAGTGCAA  
TATAGAGGAGAAGATATGAATATGTTACCATATCTTCGCTCACCCGTTTCTCTGCGGATCCGCCATTCCTGCA  
CCCCTCACACTCGGCTTGAATTCACAGTGGGACTTTGATATTTGAAAAGAAGTTAAGTGTGAAATGGTGGAGT  
GGAATGGTTAAAAAGTGTGACGAGAATGAAAATACGGAAAGAGTGCTCAGTGTCCGACTTTTAGCGCGCCT  
GACTTGGTGGATTG

>TCONS\_00023912

CATAACTCCTATAACACCCACTACTCTTATCCATTATCTCCATAACTTCCAATACTTATGGTTGTAACCTCCAT  
ACCTCCATGATCTCCCCCATGATCTTCCTCCATGATCTCAAAAGCTTAATGACATATTTATGGAATTCTTTGG  
TATACCTCTATGTAGTACTATAAATAGAGGATGAGAAGTCATTTTGAATACACTTGAATACATGAAAGAAAT  
AGATTCTCTTCTCT

>TCONS\_00023917

TGGCATATTTGTGGTAACAATCTTCTGTTCCATTTTCAGATTAACGAACTAGGGAGAAGAATTACTTACATCTT  
GCACAAACCGCGGTGTTGGGTTTTAAGAACATCCTATCTAAAGTCCGTTCCAAGTTCTCATAGCTACTATGAG  
CATTCAGATCTACCTTCCTTCCAATTGCAACTCCATCCATATTGACCTTCACAAACATGGAAGTCTTGATGAGC  
CCTTCTCCTTGGCAAAACTATTGCTCTTGCTGCTACTCGCATTAGCGATAATATTTTGTCTTTGCATAATTCTT  
CTGTGGGTGGTGATTTTGTCTGGTTAACTAGGGTATTCATCCGATAAGTCCTTACAGGAGGCCATCCAACAAC  
CTGACTGACACTAGAACGGGGAGGTGAAATAGAATCAGCAGCTCTCTTGGTGCCAGAGGAAGCATTATTATT  
ATTAATTTTAGTAGCTGAAGAAGAGGAAGATGAAGAAAATGAATTGGAACCCAAAGAAGGGAAATTTTATG  
CCGTCAAGATTTTAGCCCTTGAAGCTCCAGTTTTATTAGAACCAAGACTTAGTCCAAGACCCAATTTCGAGCTC  
AGACTCATCAGGGTATGATGAAGAAGAAGCCTCAGATGATAACAACACCATATTATCTTCCTTTGACACTGTT  
GAAATTGACCCATCAGTTCCTCCTCCACCAT

>TCONS\_00024075

TAAATTATTAGGTAGTGATATGAAACAAGTCCAAAGGGAATAGAAGTGAATATTGAGGATTCATATATTGTTT  
TTAACCAGTTTGATATTGAAGCTAATTGCTGAAGTTATCTTCACAATTTTCCAAACTTTCAGGCCCTATTCTAT  
CTTTGAAATTCCAAGTTTTTTCAGAGGCAATGAAGATCATTCATATAATGAAAAGGAAAAGTGGAAAAGATAA  
GAGTTGATTCCTTGCCTGGCTTGGCAAGACCGGTCTTTCCTATAAGGCAACCGATGATTGCAGCCATGGCAGT  
GTTCACTCTGTTATTTCCCTTGGTTAAATAGGCAGAAATCTGGGGCTTATCCTCAACTTGGTTTATTCACATTTT  
CTTTTTTTGACAAGTCTTTCTGGAAGTATTCTAGACTAGAAGTATTTTCGTGGTTCTTTTTGTTCTATTATTGGA  
ATTCAGGTTCTCCGCTATTCTGACTGGTACTGGTTTATTACAGATTGGAGAGAGTTATGGTATCTCCAACATC  
CCAGGATCATCTGTCTTCATACATAGCCAAATTCTAACTTGTTCCGTGCTTTGAACAAGTTTTAAGCTAATTCT  
C

>TCONS\_00024080

GAAGTTGTGTGGAGAAAATGATAGATAAATAAATAAATGATGGGGCTATGATGAAATTCTTCTTAGAAAATG  
CAATGAAGCATTGAGATAATTTGCGCCGTAGCTTGGCAGGGCGACCTGGTTAGCGTTTATGGTAACATGCTGA  
AAGTTTGAGCCATCACGGTGTGAAAGACTGAATGAGACTTGAACAAGATCTGAGCCTAAAATGTATGGAT  
TATTTGATTTTGTCTCTGCAGTTGACTTGCTGACTAATCTGCTGCTACAGCAGTTGAGTTGCACAAATAGCCGA



TTTTATGACCCCTTGTATTTAGAACAAGGTAGAAATGACACAAGGTAGCCACTTTAAATGCTGCTAATAATGG  
GCTATGATGATTTGATTCTTTCTTTCTGGTCTATCCTTCACCAGCTTTGAGGTAATCTGTCCCGTATCTTGGCGG  
GGCAACCCGGTATGGCATCTTCTGCAAACCGGTTTTGCAGCCATGGCATGGTCACTATCTCTTTGCATGTTTCA  
AAAAGCAAAATCTGAGCCCTAAAAGTTTTACGACAACCATTTGATGGTCTTGAATGATGGTCGATCTCTGGA  
ACTGGAAATCCAATTGGGTTCTTCAGTTTTTTCTTGAACACCAATTGTCAGATGCAGTTCTCCATCAATTTTTTT  
GCTCAAAACTGAGGAATCGGAGAAAAATGGGGATTTGAGGTGGTTGACCATCTCCGGCATGGCAAGGATTT  
CTATGTTGCTCCAGACGAACATCCCTTTCTGAGTATGCATGCATCTATGTCTCTATCTTTGTTAATACTTGTTAA  
TACTGTGCTCCTGCGTGGCTGCGTCTTGAGGCAAAGAAGGTAAATTCTTCTTCTT

>TCONS\_00024081

GAGAAGAAGTTGTGTGGAGAAAAATGATAGATAAATAAATAAATGATGGGGCTATGATGAAATTCTTCTTAGA  
AAATGCAATGAAGCATTGAGATAATTTGCGCCGTAGCTTGGCAGGGCGACCTGGTTAGCGTTTATGGTAACAT  
GCTGAAAGTTTGCAGCCATCACGGTGTGAAAGACTGAATGAGACTTGAACAAGATCTGAGCCTAAAATATT  
TTGTCTCTGCAGTTGACTTGCTGACTAATCTGCTGCTACAGCAGTTGAGTTGCACAAATAGCCGATTTTATGAC  
CCCTTGTATTTAGAACAAGCTTTGAGGTAATCTGTCCCGTATCTTGGCGGGGCAACCCGGTATGGCATCTTCTG  
CAAACCGGTTTTGCAGCCATGGCATGGTCACTATCTCTTTGCATGTTTCATAAAAGCAAAATCTGAGCCCTAAA  
AGTTTTACGACAACCATTTGATGGTCTTGAATGATGGTCGATCTCTGGAAGTGGAAATCCAATTGGGTTCTTCA  
GTTTTTTCTTGAACACCAATTGTCAGATGCAGTTCTCCATCAATTTTTTTGCTCAAAACTGAGGAATCGGAGAA  
AAATGGGGATTTGAGGTGGTTGACCATCTCCGGCATGGCAAGGATTTCTATGTTGCTCCAGACGAACATCCC  
TTTCTGAGTATGCATGCATCTATGTCTCTATCTTTGTTAATACTTGTTAATACTGTGCTCCTGCGTGGCTGCGTC  
TTGAGGCAAAGAAGGTAAATTCTTCTTCTT

>TCONS\_00024127

GTCAATGTCTGCCTTAAATTTATATTTGAAGGGACTATTTATGTTTTCTTGGTTAACTGTGGTATAACTTGTTAA  
TATGCAGTGTGATTTAGTGGAAGTGTGCGGAAGTGGCCAATGTTTTGCTATGAAAGCAATGGATAAGAGCAT  
AATGCTTAATTGAAACAAGGTGCATAGAGCTTGTGCAGAACGAGAAATCCTAGATATGTTGGACCACCCTTT  
TCTTCCCGCACTCTATGCGTCTTTTACGGTTAGAGACATAGAAGTCTGATGAGAGGGGGCATAATTATGTAGTT  
GTAGT

>TCONS\_00024147

TTTAAAGATTGAACCCATCAAAGTGTACATTATGAATCTGCCTCTGAACCTACCCGAGAATAGTGCATATTAA  
GTCTATTCATCGAACGTACTCATAAATCCACCAAGAAATCCAGCACCGTTGCAATCACACATAACATATCTT  
TTTTACCTCTGCACAACCAACATAGTCCACCAGCTTTGAACCGCCCGTTGAAATGATCTACAGAGTTAACCCC  
AGAGCCTTTGCACTGTGAGCACGATACTGCACCATTTCCATCACAATTTTGACAGACTATGCTCCTTACTTTTCG  
TGTCTTTGTCACTGTGAGTGGCCTTCACTTCCACAAGTCTCAAGTTAGTCTTGGAGCTGTATGAAACATCTTTG  
ATCCATTGAATCTTTCCTCCGGTGCAATTCCCATTAATCAGA

>TCONS\_00024238

TTCTGATGAAGCTTAACTTGCAGTACCTTTTCTGTTTCATCACATCATGATAATACAGAAGCACGCACATTGGTT  
GACCAAGAATGCAGAAAAAGCACCAGAATGTCATGTTGCCACATTCGAGCTTTTGAAGTTGTTTTGCAAGA  
AGTTCGTGAGTATGACCAAGGGAATCTGAAACATGATTCCAAAGAAAGCCCAAACTTGAATAGTCGGCAA  
GGAACAGCAATACACAGCTCGTGAAAAACAGCAGATACAAAGAAAGAAATCAACATCGCAACCCCTTAG  
GTATGCCATTCTTAAGCATGGGAAATAAATGTGACGCACCATCCACTTATGTACAGGCATATTCCAGAGTCT  
CCAATACTCATCAATAGTTTTTGATTCCACCAATCTTTGTAGAACTCACGATCCCCAAATCGCAGAAGTCC  
CCAAGTATATTTAGCCAAAGATGAAAGAGGCAGTAGAACATGCAGAGCCAGACATATAAATTTGGAAGTGA  
AAGCCTCAATACCCTCTCGATGGCGTATAAAAGGTCTCCTTTCAATGGATGTTGTGAGTTTTGCACAATTGGGT

TAATATACTGTTCAATGATAAATCCCATAAATCCTGTAAAAATTACCAGCTTGATGAGTTGGCGCGCCAGCCA  
ACCCTTCCGAATGCATGCAGTGCGAGGATAGCTAAGCTGATAGCACAAAGTTGGAGCAACCATGAAGTAAG  
CCAAACTCTTGAAATTAACATCGTATGAGTAGTTGACATCTGAATGTTACCCCT

>TCONS\_00024273

ACAAAACAAGAAAACCAATTTACATTCCATTAATTCTTCATATTTCAAAGAACAAAAAGCTCCCTAGTAAAA  
GAAATCTTCTTCTCCCATATAACTAAGTTTCAGACAACATATGACAAAGGAAAAGAAAAGGAGGAATAA  
ATCTCAATATCGGATCCAGACATCTGACTGCACTTTAGAAAAGAATGAACAGAGCAACCCATACACTTCAAG  
TAGACACGGAAAACACCCTGCAGGTGCAGTCTATCTAGTAAGGCCACCAATCTGGCTTCGTCACCATGATCT  
GATTATACTCCGGCCTTGCAGTCAGATCCTTGAAAATGACAAAAGCTACAACGAAGAAGAGGACGAAGAGA  
ATCTCGAACTCAGCAAAACGGACGAAATCGAATACGGAGTCTACAGCTCGAGTCAAGATCGACGGCGACGG  
TAAATCGTCCCTTCTTCCACCTCTCCCTACCCTCTTCCCATTCTGTCTTTCCTAATTTGGAAATGGACGAACGC  
AAATGCCCAGCTTTTGATCAATTT

>TCONS\_00024510

ACTTCCCTAAACAACCTTCTGCCTGTCCATCTCAAATCAGGTATCCTCAACTCTGGAATGAAAGACAAAGCTCG  
GGAATGTAGTCGTAATGTCCTTGAGATATTGGAGAGTCATATTCTTCAAAAGTGAAGGATGTTGCAAGACCA  
AACTTCTCCATTCTCCTTATCAATCTTCCGTCATGTTTAGTATCGGCTTCTTCAAAAGTCTTATCAATTATGC  
TCTCAATGACATCATCTGATAGGTTTCATACCAGACTCAGCAAGGGTAGCAACCACCATTTGCTTCACCTCTTG  
CCTCTCAATGAAGCCTTGTTGCTTGAGATCGTATAGCTGAAAAGAAAAGTCAATCTTATCATCAATAGGAGCA  
TTTGATGGAAAACAGAGAGGGCACGAGCAAATTCCTCAAAACCCAAGATTCCATTGTGCTTTGTGTCAAAT  
AAATCAAAGACCCTGTCGGCAAACAAGCTTTCCTTTTTGATCGTCTTGAATAGTGCCAATTGAAATTCCTCCTT  
GTTGATCAGCCCATCATCAACCACTGCGCTGCTGATCTTCTTAAATAGCTCATAAAGAGCTTCAATCTCACTG  
ACGCTAAAAACTGTTTCTCGTGCTAGGATCTCCGGATCTTCAAAGCCCGTTGATTGCCTATCCAGATCACAAC  
ATTTGACAGAGAAGCACCTAAATGCTTGATACCGTCTAGGCACTGCAACATGGTATGATCCCTACTTCAATA  
TGCTCCATATCCTTTGACCATTCTCTGTTATCGTCCTATCTGAATGTAAAATGTTGCGAGTTTCTGAAAATGATC  
AATTTGGAGCTATATATCTGACAAGAAATACAAGTCAATATAAACTTAATTCTATCAATAACCCCTCAAACA  
AACAAATAAAA

>TCONS\_00024528

AGATGGTGGCTGAAATTTTCAGCCAAGTTTTCTAGAAATTTGCCCCACACGAAATTGCTATTTCCGGTATTAT  
TTGGGTAACACAGTAGAAGACCGTGGAACGTTTCGAGGATCACGATTGTGCGGGTGATGGAGATTCCATTGAG  
AAGTTATGGAAGTGAAGGCTCACGTGGTAGAAGAGATATGTTACGCTTCAAGAGGTAACCCGTGAAATCTC  
GTTTATGCTAGTTGTCTAGATTACATGTGATTTTGATACTGGGATTGCTTCCGCTGCTTATTATAATCCATCAAT  
TAC

>TCONS\_00024747

ACAAAATCAAGAAAAATTACAGAAAATTCAAAGATTCAATCAAAAATAGAATAGCCAAAAGTGAGAACAAG  
ACACAAATAAGAGGCAAGCAAAACCTTCTAGTTAAGCCCCTTCTCAATCGTATTTTAAAAGGAATTTTTTTAA  
ACCCTAACTTAGAACTGAAATTTACCATTAGAAAAGTGGAACAAGATGGAAAATTTCAAGTATAATTTTT  
AAAATCTTACCCAGAAAAAGATTGGCAGCTGCTTGATGCCTTGATCACTGAAGAAAGAACGTGTGAATCTGT  
GATGGTGAAAAGGTGGATGAAATTTGTTTTGGTCGTTTGGGTTTGGCAGAAGGATGTCAAAAGAGAGAAAAG  
GGAGTACTGCGTTGAAAT

>TCONS\_00024905

GCTGTCATCGTGATCCAGAGGAACCACCTCTCATCCACCCAAAAAATCCACCATTTGACCAATCAACTGA  
ATCTTTGTAAGGCTGCTCCACCAGTTTCCTCATGGTATCAATAAGAGTGCCTCCAGAGAGCACAAACAGTGAA

AGAACCTTTTTCTTTGATGAATTTATCAGACAAATCAGCAGTGTATTTGGCGAGTGCCTTTGCTACATCTTCTT  
CAGAGTCGAACTTTAACACCGTCTTCTTCCCTTTCTGGGTGCGCATCTTCGAAGCCCAAGTCTGTTATTTCTTA  
AA

>TCONS\_00024917

ATCGGAAAGCAATTTGAAGCAGCTAAAGAAAGATGAAGGTAGCCGAACATTTACAATGAGAGAGTTGTTGG  
ATGAATTGAAGAATGGCGATGCTAATGATGATTCTGAAGCCGAAAGACGAGAAGGCGACACTCCTCACAGT  
CAACAGAGCAATCAGCAGCAGACAGACAGTAATGCTGCCTTGGAGTTGATTAACAGCGTCACAGGTGCTGA  
CGAGGAGGGCCGATCTCGCCAACGGATTCTGACATATGCTGCCCCGAGGT

>TCONS\_00024961

GCGATTTTCATGTGTTTTATCAACTTTTTGGATTATTAGTGTTAGAATATTATTATTAATCTTTATATTATGTGATG  
TATGAATTCATGTTTCGTTTTGTGGTATCATGTCAATTGTCAATAGCTTCTCCTAAAATGCGAAGTCTACCTTTTG  
ATCTATATAATGAATGGCCTCCATCTTCTGTTGGAAGGTAATATCTCTATTTCTAGACAATAACTCTTATTTTCAT  
TGCTAAAATATGTATTTTTGGTGGTTAAGTATTGATGATAATAGTGAAGATATATTAAAGAGACGACTCGTTA  
ATACTTGTGGAACCTGATTGTATTTGATGGTCATACTTGAATACTCGTGGAAGTTTCATGCTACTCCTCAACAG  
ACAAGCAGTTGATTTCGATGTGCTTAATCCACCGATTTATTGTTTGAGAAATTTGAGAAGCCTAAAATATCAGG  
TTGGTAATTTGAAGGCAACTGATTCTTTATGTTTTCTCCCTCGATTGGGACTGTCTAAAAGGTAAAAAATGATG  
CTCACTTTGCACTTGAAACATGTCAGCAAGCTGCGACGCTCAGGATTATCATGATAAGAAGTTGCTATTGCCT  
CCTCAGATCTATTGCATCAGGTAAGAAGTGAAGCCTCAAAATTTAGACGTTATTAACAAGAAAAGAAGATAA  
CTATCATTAGACTGATGACATATTAATGTGACCATAAATATGTGTCATAGATAAACTGTTGCACATATTTTTCT  
GATTCTTATGAGGCATTTCTTAAACTTTGGATACATGATTCAACAATAAATGAACTCCATATTCAATATTCAAG  
TTTCGAAAGACTGCAAATAAGGATATTGCAACTTCTTGAAAATGAAATGGAAACACTTAGCAACAAGAGCTA  
TGCCTTATGAGATCAATCAATTTGTCATCCTTTTTTACCCTCTTTTTTTGTGACAAGTATTTCTCTATAATTCATG  
GCTATATCTCTGATGCGAAAAGAATTTGAGACTTGTTCTTACATGGGATAAAGTTTTATGGTCTGTCACCTTCA  
AGTCTGTTGGGACAAATGTTGTAGCAGGTTATTATTTGTAAATCTTTTCTGACTCTTCAAAGTGATTCTGAGTT  
GTCAATATCCTTCTAGTGTTTTCTTGGTTATTGAACATAGTGCCGTAAGATAATTTCTTTCTCTACCCATGCT  
TGATTCTCTTTGTTTCCAAATGCTTTTGGTCTCAACAAAAAAGGACCTCTTGCCGTGCACACTCCTAAAATCT  
TCTGCTGATGGCACTTCAGTTGATTCTAG

>TCONS\_00024962

GTTTGGAACAAATACTTAGGTGCGTGTTTTTTGTTTCTAATTTTGGTTGTGTAACGTTGTTTTTAGTGTGCAAA  
TTTTATTATTTGAAGTTGCCGATTGAAGGTGAATTCAAAAAGTTTGTTTTTCTGATTTTCTTTAGATTGCTTTCT  
TCGTTCTTAGAAAAGTGGATCTGAAGCAGTGAGATGCTTCTGTTCTCCAGTTTTGTTCTCTCTCTTGTGAGTTTT  
ATGTAATATGTGATTCTATAAATGACTCTCACTATTACTATACAGTTGTAGAGTGATGCACCTAAGGTGTTTG  
ATAAGGAAATCTTTTGCAGGCACTATTGGTTCTTGAACCTTCACTATTTCAATGTATTTTCATGCATTGCAA  
CAGACATGGGGGTGGTCTTCTGTTTTGAAACCATTACAAGCTTGAACCAATTACCTGAGCGAGAAAAAAATC  
ATCGGCGAATTTGAGAGGAGCTGGCTCAATGAACAGGAAAAGTACTATCAATTGATAGACAAGCAGTTGATT  
CGATGTGCTTAATCCACCGATTTATTGTTTGAGAAATTTGAGAAGCCTAAAATATCAGGTTGGTAATTTGAAG  
GCAACTGATTCTTTATGTTTTCTCCCTCGATTGGGACTGTCTAAAAGGTAAAAAATGATGCTCACTTTGCACTT  
GAAACATGTCAGCAAGCTGCGACGCTCAGGATTATCATGATAAGAAGTTGCTATTGCCTCCTCAGATCTATTG  
CATCAGGTAAGAAGTGAAGCCTCAAAATTTAGACGTTATTAACAAGAAAAGAAGATAAATCATTAGACTG  
ATGACATATTAATGTGACCATAAATATGTGTCATAGATAAACTGTTGCACATATTTTTCTGATTCTTATGAGGC  
ATTTCTTAAACTTTGGATACATGATTCAACAATAAATGAACTCCATATTCAATATTCAAGTTTCGAAAGACTG  
CAAATAAGGATATTGCAACTTCTTGAAAATGAAATGGAAACACTTAGCAACAAGAGCTATGCCTTATGAGAT

CAATCAATTTGTCATCCTTTTTTACCCTCTTTTTTGTGACAAGTATTTCTATAATTCATGGCTATATCTCTGA  
TGCGAAAAGAATTTGAGACTTGTTCTTACATGGGATAAAGTTTTATGGTCTGTCACTTCAAGTCTGTTGGGAC  
AAATGTTGTAGCAGGTTATTATTTGTAAATCTTTCTGACTCTTCAAAGTGATTCTGAGTTGTCAATATCCTTCT  
AGTGTCTTCTGGTTATTGAACATAGTGCCGTAAGATAATTTTCTTCTCTACCCATGCTTGATTCTCTTTGTT  
TCCAAATGCTTTTGGTCTCAACAAAAAAGGACCTCTTGCCGTGCACACTCCTAAAATCTTCTGCTGATGGCAC  
TTCAGTTGATTCTAG

>TCONS\_00024978

CCTACATTGGCCTCCAAGGCCATATCACTACTCTTCTAAGGAGCCATTTGAGTATTCATTACCTGCAACACCG  
GAAGTTCCATTTGGTAACCGGCTCGTGCTGGTGAATTTGAATAAGGTGAGTAGGTTGAAACAGAATTGCTTC  
GTGTATACCGGTTCTGAGCAGTGCTACTTCTTGTTGCCCTAAGGCGGGTCTTCTCCCTTTCCCATGCATTTCT  
CCAAGTGAGGAGCAAACCGTCCAGCTACTATAGACCGGCTACAGTTCATACATTCAAGTATCTCATTGCGA  
CAGGAGGATGAGTTTGCCCAAATATATCTACAATGTATTTGCCATTTGTTTCACTGCTATTGCTAGGATCGGCT  
ACTGTTGCCCGAGCTTGGGCAGACAACCGCAGTTCTTCTCTTCTTCTTCTAAATTACAATCAAGGCCTAATTT  
TGCTATTCGGTGACACTCAGATGCAAC

>TCONS\_00025064

ATATTCCTAACCTTCTGAATAATTTTCATATTGGTCGACTCCAGGCTCAAGTACAACATGACAGGACAAAACA  
ATTTTCCCTACAGTGATGGCCCAAACATGCAGGTCATGAACTTCTGAAGTCCTACTAAAGATTTAAGGCCAT  
TCTCGAGTTTAACAATATCAACTTCTCTGGTGTCTTCTCCATCAATAAGGAGAAGATAATTCTAAGCATGGG  
TATGGTAGTACTAAGAGCAAAGATCGAGAAAAAATAGTACAGAGAAGATCAACCACCAACCATTCTGGTT  
TGAACCACATAATAGCTCCAGCAATCATCACCCCAACTGATTGTATCAAATCAGATATAACATGCAGGTAAG  
CCCCTTCGATATTTATGTTTCGTTGGTTTGTGCAACTAGAGGCTGCTGATACCAGTTTCAAGCTCTCTTCTTCAT  
TTCTTGATGCAATTCTTGCATTCGTGATCGTGATCATGATCATGATCCTTGCAAGGATTATATGAATGGCAA  
TGGAGAGAATGATCATGGCCAAGCCACAAAACCTGAGACGAAGTTAATTATGAGACCAAATGCAGCAATAGC  
AAACATAAGCTTCCCGTTCACTTTGGCTTGTGGATGAAACATTCTCTGAATTGCTTCATAAATCAGCAGACCA  
GAGACAAGCCATATTAGCTGTACAGATAGAAGGGCTCCTAAAACCTTCAAGACGGTGGTACCCGAAAGAGTG  
TTCTTTTGTGCGATCCCAGCCGGACACCCAAACAGCAAAAAGAGAAATAGAAAATCCAACAACATCACTGA  
GCAAGTGAGCTGCATCAGTTAGAACCGCGAGGCTGTGGGCTTTACCCCTCCTATGGTCTCCACTGCCATGAC  
TATTACATAAAAGATTATGAGCCCACAAAGTTTCATAGTCGACTTTGACCTTTGTCTTGAACCCAACTACTA  
TGCTCTTGCTCTGAGAATGAGCAAATTGGATTGCAACAAGACTGAGCTCGCTTACCGTTGCCATTACATTTTG  
CTCCCAGCAATTGCTTTATTTACAGACTTGGAATCCTCATGTTGCTCCATCTGGATTACAGGACAAAAGAGAGAG  
AG

>TCONS\_00025102

CTTGATTAATAATTCTCTCAGATGAAACTACAATATGCAGGTCGTGGAGGTCCTACTTCAGCTCTTCTGCCTT  
TGTGCTGCCAACATCTTTTATTACCTTCCGAAGGTTTCCTTCTGCAAAAGGAACCATTAAGCAATGTTGCTCCA  
CAAGCTGGAGAATGGTTGACTGATGGACCTGCAAATACACTTGGTATTTCTGCTCCTTTGTGCTGCCAACATC  
TTTTATTACCTTCCGAAGGTTTCCTTCTGCAAAAGGAACCATTAAGCAATGTTGCTCCACAAGCTGGAGAATG  
GTTGACTGATGGACCTGCAAATACACTTGGTATTTCTGCTCCTTTGTGCTGCCAACATCTTTTATTACCT

>TCONS\_00025125

TCCAATTCTAACAACAGAGAATTTCAAACACTTGCCTTTCCAACAACAAATAAAACCCAAATATCCATAGTTT  
CAAGTTTGTGCACTGCCAGCTTGATTTCATGATAACTAGCACCAAAAGATTATTTTAAAAAGCACAATGCGAG  
GACAAAACCTCTACAAAGTGCTAAATGCAAAGACATACAATTCTGAAGATCCAATGTCGTCAAGTTAACGAG  
ATGCCCCCTACTTTTGCAAGGTCCTCAAGTGCCTTTGAGATCTGCTCCTCCGTCAAGCCCTCCAATCTGATGCCC

CTTTCAACTCCTAGGTCATATCTGGCCCAAAGCTGAGGCTCGATGGAAGTGGCCTCACGAATCAAAATAGGT  
AATTTGGGGTTGTGAGTCTTGAGATCTCTGTAGTTCTTCTCAATGAACGCCCTAGTGGCAGCACTTTGAGGGG  
AGGATGGAGAAAAGAGGATGCGAAGCTCCTTCAGATTCGAGACAGATTTGCTCTCCACGCCATTTTCCCAC  
AATCTTCACCTTCCAAATATTCCCTTTGCC

>TCONS\_00025401

CACAATTGAATCAATTTAAAAATTTAAAAAGACCTAAAGTTAGGGATTTATCAATAGGTAATGTTGCACCA  
ATGCCCAACCAAAGGGCGGCTGCGGTACCAATCAAAAAGACAGTCGTCGCTACTGGACGGCGAAATGGATT  
TTGGAATTTATTAACATTCTCTAAAAAGGTACTGTTAATAATCCCGCAGGTACTGAAACCATTAAAAGAACC  
CCCAATAATTTATTGGGCACTGTACGAAGTATTTGAAATACAGGAAAGAAATACCATTACAGGTAATATTTCCA  
AAGGGGTTGCAAATGGATCTGCCGTTACCAATCATTGATGGTTCTAAAACGGCTAAGCCAATCAAAAAGA  
CAGTCGTCGCTACTGGACGGCGAAATGGATTTTGAATTTATTAACATTCTCTAAAAAGGTACTGTTAATAA  
TCCCACAGGTACTGAAACCATTAAAAGAACCCCAATAATTTATTGGGCACTGTACGAAGTATTTGAAATAC  
AGGAAAGAAATACCATTACAGGTAATATTTCCAAAGGGGTTGCAAATGGATCTGCCGTTACCAATCATTGA  
TGGTTCTAAAACGGCTAAGCCTACATTACATGCAATAGTACCTAGAATTACTACTGGAAAAATATATAAAAG  
ATCATTGGGCCATGCGGGCTCTCCATAATAATTATGACCCATACCTTTAGCCAATTTAGCTCTTAATACAGGA  
TCATTCAAGTCAGGTTTTTTTTGTTATTGGGATAGGTGAATTCCTATAGATCCATCCCCGAGGGAAGTGGACAT  
GATAATTTTAAATCATCCAG

>TCONS\_00025402

ATTCACAATTGAATCAATTTAAAAATTTAAAAAGACCTAAAGTTAGGGATTTATCAATAGGTAATGTTGCA  
CCAATGCCCAACCAAAGGGCGGCTGCGGTACCAATCAAAAAGACAGTCGTCGCTACTGGACGGCGAAATGG  
ATTTTGAATTTATTAACATTCTCTAAAAAGGTACTGTTAATAATCCCGCAGGTACTGAAACCATTAAAAGA  
ACCCCAATAATTTATTGGGCACTGTACGAAGTATTTGAAATACAGGAAAGAAATACCATTACAGGTAATATTT  
CCAAAGGGGTTGCAAATGGATCTGCCGTTACCAATCATTGATGGTTCTAAAACGGCTAAGCCTACATTAC  
ATGCAATAGTACCTAGAATTACTACTGGAAAAATATATAAAAGATCATTGGGCCATGCGGGCTCTCCATAAT  
AATTATGACCCATACCTTTAGCCAATTTAGCTCTTAATACAGGATCATTCAAGTCAGGTTTTTTTTGTTATTGGG  
ATAGGTGAATTCTTATAGATCCATCCCCGAGGGAAGTGGACATGATAATTTTAAATCATCCAG

>TCONS\_00025403

ATTCACAATTGAATCAATTTAAAAATTTAAAAAGACCTAAAGTTAGGGATTTATCAATAGGTAATGTTGCA  
CCAATGCCCAACCAAAGGGCGGCTGCGGTACCAATCAAAAAGACAGTCGTCGCTACTGGACGGCGAAATGG  
ATTTTGAATTTATTAACATTCTCTAAAAAGGTACTGTTAATAATCCCGCAGGTACTGAAACCATTAAAAGA  
ACCCCAATAATTTATTGGGCACTGTACGAAGTATTTGAAATACAGGAAAGAAATACCATTACAGGTAATATTT  
CCAAAGGGGTTGCAAATGGATCTGCCGTTACCAATCATTGATGGTTCTAAAACGGCTAAGCCTACATTAC  
ATGCAATAGTACCTAGAATTACTACTGGAAAAATATATAAAAGATCATTGGGCCATGCGGGCTCTCCATAAT  
AATTATGACCCATACCTTTAGCCAATTTAGCTCTTAATACAGGATCATTCAAGTCAGGTTTTTTTTGTTATTGGG  
ATAGGTGAATTCTTATAGATCCATCCCCGAGGGAAGTGGACATGATAATTTTAAATCATCCAG

>TCONS\_00025404

ATTCACAATTGAATCAATTTAAAAATTTAAAAAGACCTAAAGTTAGGGATTTATCAATAGGTAATGTTGCA  
CCAATGCCCAACCAAAGGGCGGCTGCGGTACCAATCAAAAAGACAGTCGTCGCTACTGGACGGCGAAATGG  
ATTTTGAATTTATTAACATTCTCTAAAAAGGTACTGTTAATAATCCCGCAGGTACTGAAACCATTAAAAGA  
ACCCCAATAATTTATTGGGCACTGTACGAAGTATTTGAAATACAGGAAAGAAATACCATTACAGGTAATATTT  
CCAAAGGGGTTGCAAATGGATCTGCCGTTACCAATCATTGATGGTTCTAAAACGGCTAAGCCTACATTAC  
ATGCAATAGTACCTAGAATTACTACTGGAAAAATATATAAAAGATCATTGGGCCATGCGGGCTCTCCATAAT

AATTATGACCCATACCTTTAGCCAATTTAGCTCTTAATACAGGATCATTCAAGTCAGGTTTTTTTTGTTATTGGG  
ATAGGTGAATTCTTATAGATCCATCCCCGAGGGAAGTGGACATGATAATTTTAAATCATCCAG

>TCONS\_00025584

TTTACTCATTCCCCAAGTTAAGTGAGCCATCCTTCATTAGCTTCACACTCAAGACTATTAAATCTCCCTCTTGA  
GTAATGTCGAGAAGCCTTTCTCCAATCTGTCCCAGTTCTCATCATGGCTACAAATTCTTCATAGCTAATGCTGC  
CATCCCTGTCCGTATAAACCTCCTGTAAAATGTCATTACAAATGTTGGTGCAGTCATCTGCTCCATCCTCCATC  
AGTGCATCTTGAAGCTCATGTGGTTCAATATAGCCATTTCCATCCTTATCAAAGTAGGAGAAAGCCTTGTGCA  
AATGTTTCATCATTTGCCATCCTTTGAAGATGGAGTGAAACAGCAATAAATTCCCCATAATCCAGGGTCCCTTT  
GCCGTTGGTAT

>TCONS\_00025586

TGAAAGGCTCCTGTGGTTAGTTCCAATACGTATTGCACGTCCGTACTTTTTACATTTTTCCACCAATGGTGTAA  
AAACCTCCTCAATGTGCTCAAGTTCTTTCTGGTAGTCTTCTTCTGTGTACTCTAATTGCTCAAAGTGGGCTCGCC  
TGTCAGCAAAGTTTTTCAGGATTGACACGTATTTTTTCAAAGCACTCCGCAACTCGAAGTGCAATAGGAGGAGT  
AAAATGAATGTCAGCCACCAGAGGGATATTGTAATTCTTTTGCACAAGAGAATTTTTAATTTCAAAACATGCA  
TTAGCTTCTTTCTTCCCTTGGACTGTAATTCGAAGTATGTCAGCTCCTGCGTCAGCTATTTTCATCACCTGTATA  
AACAGGAGTTAGCATCAGCGCTAAACTTACTTGGCTTAAAATTTTCATGCCCATTGAGGAAGTAATGAGGTTT  
TATATATA

>TCONS\_00025587

TGAGAACAGAACCATCTCGATGCAACACGCCTCTATAGTCTACTTCATCACCCCTGTTACAAAAATCAAAACA  
TTTGTTTGCTTCACAAAATGAAGCCTCATATAGCAGATCTGCTCAGGGTTTTTACCTGACCTCCTTTTGAGCTG  
GCAATTCCCCTGACCTACGTTGAAAGTCAAAATAACGTCTGTTCTTTTCTTCAAAGGGGCCACTCCTTGTTGA  
AGCTCAGCTGCTCTCTTTCCAAGGTTTGCCAACCGTCGACAGGGATCTATCTCCTCCTCTGGAGGTTTCAGTTAG  
GGAAACCCTTATTGTATCACCCAGACCATCCTGCA

>TCONS\_00025664

ATGGAACAACTCATGACTTTGAATCAGGTTATGTATTCAACCTATTTAATATTCTGAGGCAAAAGGCTGAAAT  
GCATTACCATCATGTTTGGCCAGAAGTCAAGTTGGGTGGAGAGTAATTGTTGGTTTCGATAATTGGATTCTTC  
GCTGCTGCTTTAGGAGTGCAGGAGGAGTAGGGGGAGGTGGTATCTTTGTTCCCAT

>TCONS\_00025671

CTTTCATCCTAACATGTCCTCATCCAGTGTTAGCTTGAGTTCATAACACTTTGCTAAAGTAGATGTTTCATGAAG  
TGCTTTGATGGATTGAAGCCAATTAATAAAGATGGGTGAAAGGACGATGACAATGCCAATTGGATATAGG  
AAGAATGTTGTCCTCTCCAAAAAGGGTAATACGTCATAACCTAAAAAGTTGAGGTAATGATAGTAGGAAGCA  
GCAACCATGAAGAGCAAATTTGACAGCAAGACAGGAATGAAACCATGAGCTACCAAAACAGGGGAGAGAA  
AATAATGTATAACGTATAGCAAAACAAACATAGGGAAGAAAGAGTTGCAGTGGACATCAAACGCGTACAAC  
CATTCTACCCGTTGTTCCACGGCATGACTGCTTGGAGCTTCCTCTCGAAGGTAATTGTTGGTTAGGAACCAGC  
AACATGTTGCCAAAGTAGCTCCAGTGAGTACAAAATGAAAAAGCAATACCGAGATAACTACAAAAACAGCA  
TGCCTGCACTATGATCATAACGCAACACAGTATGCCAAAGTAGCAACCACCAACAGAAGACTGCATATTACG  
ATAAATGCAGGATCATCACGTGCCCACTGGTTCTTTGTTTGCTTGTGGTACTTTGTGTGCTGATATACAACCTT  
AGGAGAGGTGCATAGGTGAAGCATTGCCAAAAGGTATATTCAATGTCCATTTGTTGCCACTTGATTATTCGG  
CGAAGGTAAGTGAAGCAATACTGAATTGGGTTCGACATGAGAGCTGGTTCGACCTTTCGAAGTTGTGGGCAGC  
ATCTTTATCTTTTTC

>TCONS\_00025891

CTTCTACATGATATCACTACGTAATGTTCTCCAGGCTATAATACAACAGAAAACCAGCAATTAACCAAGCAA  
GTCTCTAGATCCCACAAAATTAAGATATCTAGCGACCAATCATATGTAAACAATTTCCAAATCAATAATTTGT  
CAGAGTCAGAATAACAAGAGGGGAAAGCTAGAAAATTTACCAATTAAGAAGCACCAACGATGATGTTATTGA  
TAGGAATGAAAATCAACTTCACGAAAAATCCAACAAATCCCATCACAACAAAACCGATCGCTGTACGAGTA  
GCAACCTTGGTAAATTCTTTACGATCAGGCTTGTGACATCTTTTGACGAGCCTAACGCTGTCTTTGGCGAAATC  
TCTAAGAGGATCGAACACAGAATCGAGGGCGTCCATTTGAATTGGATCTGATCTGAAAGAAGAAGCAGATTA  
GGGTTTCTCTCTGAATTGGGTGAAATGGAGATGTATGAAATGAGCTTCGGATCGATGCAAAT

>TCONS\_00025986

GGGGGATGCTGAATCGAAAAAGGTATTCCACTTACCGCTACAACATGTGGAGCTAAACTACTAAATGAGTTC  
TCGAAGCCATAATAAACTGCAATAACAGAGAAATTCAACTTTTCAATTTGAATATAACATGCAATTGAGCACC  
ATTAAAATTTAAAGGAGTAGTCTATGTACCAGTAAGAATATCTATAACCCGTAGTTCTTTCAGTCGGCCAGCT  
AGCACTAGTCCAATAGCAACTGTCCCATATAAACAGAGAAGAAAATGCCAGAGAAGAAAAGCCATAAAGT  
ATCTGGTGTCTCTCGCCTATGCAATTGTTTCATCCATCCACAATGATGATCAAATCGAGCGACACAACGATC  
ACAAATGCTGCAGTGCTTTGACCTAGCAGGTCTGTATTTGGAATCTTGCAGGTTGGACATTCCTTTTCTGAGAA  
TATAATATTGTCATAGGGATAAGCAGATAGATACTGCGAAACATTCTCAATATTTACAGTTTCTGGGTCAGAA  
AAGCTAGTCAATAGAAAGAGTAGAATACCCCTCCAAGTCCCAACAAGCTCGTGTACCTGGAGGATGGGATT  
AGGACGATCACAACAATAGTACTCGACGCAGAAGAGTGCATCGGAGCCTCTTTGACCAAAAACAGCACCCA  
CAAA

>TCONS\_00026045

CTTGGAGAAGAGCTTTCCTCCTTTGCCCAAAACCAGGTGCTCTGATGGCAGCAACGTTTCAGTACACCTCGCAG  
CTTGTTCAACAAGTGTAGCCAAAGCTTCTCCAGTTACGTCTCCAGCAATAATGAGCAGAGGGGCTCGTAA  
TTCAGTTGACTTCTCCAGGAGGGCCATAATATCCTTGATTGCTGAAATCTCCTGATCTGTAACCAGCACTCTAG  
CATTCTCAAATTCACAATTAATTTCTCCTGGTTGGTCATGAATTGTGGGGAGATATATCCCTTATCAATCTCT  
ATTCCCTCTTCAACATGAACAGTTGTTTCAAAGGAAGAGGATGACTCGATTGTTAGAACACCATCATGACCA  
ACTTTGTCAATTGCATCAGCAATCATGGTTCCAATTCATCATCATTTCCAGCAGATATAGAAGCAATAGCTTT  
GATGTCATCACGACCTTTAACAGGCCTAGCCCTCCTTTCTAGCACTTCAATCAAAACGTTTACAGTTTTGTGCA  
TGCCCTTCTTCAGAGACACTGGATTTGCACCAGATGTAACACTTAATAAACACGTTTAATGATTTCCCTGGC  
AAGAACTGATGCAGTTGTTG

>TCONS\_00026059

CTGCTTTCAATCCCCTTACTGCCATTCTTATTCAAAACAAACTTGAGGGTCCGAATTATGTTGATTGGAAACAA  
AATTTGGATATTGTTTTTGTGCTCGATGAGGTGTGTCCAGAAAAACCTGGATATGATGCCACAGATGATGAAC  
AAAAGGCTTACCAGAAATGGATTAAGGCTGATGAGATGGCGCGGTGTTACATTTTGGCATCCATGTCAAATG  
TTCTGCAACATCAGCATCAGTCGATGGAGTCTGCTTATGACA

>TCONS\_00026067

TTTTTATTTCATCAAAACAAAATAATTACACTATTAAGTGAAGAATAAGAATTTATCATCACAGATTCAAAACA  
GAATTGACAAATCTGCAGATTATAATGACTATGTCCGGTACATGATAATGAAACAGCGGAACCATTATAACA  
AGAAGCAAGTAAACAGCCGGTGGCGCGTGACGGACCTACGGTGGATCAGCCGCCGAGATTAGAAGAAGG  
AACAATAACAGTGCGCATCATATCCTTGAATTCAACGAAATCAACTTGGCCATCGTGATCTTGGTCAACTGAT  
GAAATCATCATCTCCACTCTATCAATTTCAATTCCTTCAGGCAATCCCAGTTTCTCTAGTACAGCCTGTAATTC  
CTTCGCCGATATAAAACCGTCGCCGTTCTCATCAAAACACGTTAAACGCATCCTGCAGATCCACTTCATCCTGA  
TCCGGATCCTGATCCAACCCGATCTTATCCTCATATTTTGACCCGAAGAAAACATCGTCGAGTGAGCGATGTA  
GAGCCTCAAAATCTTCGAATCTAAGGCCGTTGTTTCCTGATTTGATATATGATCTCACCATTGATTCAATTTCC

GATTGATCGGCATCTAACCCTAGCAAATTAACGCTTGACTAAGTTCGTCAACGCTGATCAAACCTGTCATGGT  
TTCTGTCAAACACGTCGAAGATCCGACGAAGACGAATTGAATTGAGGCTCGGGCTTCGAAGCCGGAACGAC  
GATGAGGAAGAAGACTTAAGTTTGCCTCTGGTAAGGCTCTGTTTACACTCGTCCTGTACTCCATTATTGTCACC  
TACTGATCCCATCGGTTTCTTCTTGTGAAAGATTTCTATAAACTATCTTGAGAAGATTTGAATAAATATAG

>TCONS\_00026101

CTTCTACTACGACTAGCGTAACAGCATCCCAAACAAAGCTACACCTGAAGAAATTAAGCTTAGCTAAATCAT  
GAAATTTTCTAGAAATAGGGAAGACATACCTGTGTTGGAGTCTTACTGTAGCTTTCTCCTATCTCCTTTATTCT  
ATTAATGAGTGGCTGCAATTTGGTTAGAAATTCAGGAGTATAGATCTGTCCTCGAGGGCCGGTGGGTGGATTT  
TCTGGGGTATATTTCCCAGTCAAAGCTCCTTGAGCGATGGGTGAATATGCAATCAACGTGACTCCCAGTTCAT  
CACAGGCAGCCTTTACACCATTTTCTCTGGAACCTATATATCAGGCTATAATTGACTTGATTTGAAGCTAG  
CGGGATGCCTCTCCTCTTCAGCTGCTCGTATGCAGCGCGAAGACGCTTTTCACTATAGTTAGATACTCCCACA  
GCTTTTACAAGGCCCTGCTCCACTGCATCTCCTAAACCATCAATATAACCTTCATTTCCCATATTCCTGGCCA  
GTGAAGTTGATAAAGATCAACTGAAGAAAAGTTTCGAGACGTGCAAGAGAATCCTTGAGGGCGGCTAGGACAC  
TTTGACGGCCTAGCCTCCACGGCAATGCAGCAAATTTAGTCGCAACAGCAACCTCGACTTCTGGATTACTTTC  
TTTTCTTTCCTTGATGAATCTTCCTAGCAGTGTTTCAGAATTTATCGCACCAAATGAGAACCTTGAACCATAAA  
CCTCAGCAGTATCGATGAATGTTATTCCACAATCAATGCTGGCATCAAAAGCAGTCTTTGCAGCCTTCAGCTT  
CCTATCATCCCCTCAAAGTTATTCCAATAGCTAGTATCACCCCAAGACCAAGCTCCAATACCAAGCTTTGTA  
ACCTTCAAATCAGACCCACCAAGTTTCACCTTATCTTCTTCTGCTTTCACTGTAACACTACTCTCAGAAGCTAC  
AGCTCTAATTGTTTTACCCCTTCTCTGGCTCAAAGAA

>TCONS\_00026107

AATATTGGTAATGTTACAAAATTTCTGACATGGAAATTTTTATAAATGTCTGTGGAATTGATATCAGATGTGC  
TATAAAACCCCAGCTGCAGTTTTTATAGCCGGCATGTTTTGGCTAAATAATCACATCCTTCGTAGACCTCCAA  
ACCTGGCTGGCCAAGATCATCCTCTTTAAAGCAAGCACATCGTTTGCTCATTTTTCCGGTCAATGCAATCTGCT  
CAGGTCGTTGAACTAATCTTGGATATCCATCGTCGCACCAAACCTCTGAACCCTCTTCTTGACTCCATCTTGAA  
TTACAGCTAGGTAGTTTGGCCTCTTCATTCTTCTGTTTTTCCATCAGCTGAGCACCTCTAGCGGC

>TCONS\_00026133

CCAAGTTCAGAAGGTGCACCTTATTATGAGATCTGTCAACAGCAACAACCTTCCCTTTGTCCTTCATAAGGAT  
TGCTATTGCTGTGGTTTTGCCCCCTGGAGCTGCACACATGTCCAATACTCTCTCTCCTGGTTGAGGATCTAAGG  
CGTGTGCAGTTATTATGCTTGGCAGGTTCTGAAGAAAAATCTCACCTCAAGCAAATCATAAAAGGAGGGCA  
GTCTAAATACTCTTTCCTTCATATCCACCGCAACTCCTTCAGATACACGAAATAACCCAGCTCTTGACATCATT  
GCTGTTCTTGGCCAATGTAGAAGCCATCTCTTCAAATAATAAGGATCTGCTTGTGATCCTTGTAGAACAG  
TGCCACGTGTCATTGCAACACCCCATCCACCATCTGGAGCAGACTGTTCCACAGCAACTGAAACTGCAACTG  
CATCACCTCTTTCGACATGAGCACTGCATGCCAAAACACCAGGCACATAAACTTGAGCACCACGAAGAAGT  
CCTCCGCACACTTTCGGCTCACAATTACCTCCTTAAGAGGTTTGCCTTCATTGTACCCATAATGTATAGCATGT  
GGTCTGAACCTTTAACAAAACTACATAGTCCATACCAGGAAATTGACACTTTGAAATACTTTTCGATGGCCT  
TAAGAGATTCTGCACTTCCAGTGCATTCTAAGGTTGCCTTAC

>TCONS\_00026134

GTTGGGAAAGATTAATTAACAAGAAGCTTGAGGCGTTAACCTCATTTTATAGATTGACCTAGGGATAGGATT  
GAACTACTTGTAGCCTTTCGGGTGTGCTTAATCTTCTAATTGTGATTAGGGATAATTCAATTAGGAAGTCTTGT  
TAGTCTTCGAGAGAAGCTAATTAAGAATTATTATCCGTGGCTAATTAACATAAACTCGCTCATATTTGTAAAA  
TCGT

>TCONS\_00026142



TGCACATTCTCTCCCTGGCGTAAGTATTCACCTCAACGCCAGTAGTACTTCCTTCAAAACACTGAAGAAAGCAC  
TCACTGTCACCACTTCTCTTGTTCAGATCAGAGACCGATTATAATGGGTGCGATACACTGAAGATTTCGAGGA  
GAAAGAGCTGTTGGGTAAAATATTTCTTTTCAAGTCATTTTTTAATAATTTCTTTCCTAATTTGACACTTTTTCA  
AATCAAAATTTTCTATGCGTTTATAATGACTGAACCTTGAATTAGATTGGAGAGCCTGATAGGAAGTATGGTT  
TGAATAATCCTTTAGTAAGGATATCAGCCACTCGCTGTGAAGTCGGAATAGATGGCATTAAATAACTCCAGC  
TCCAACCTTCTCCTTTGTGAAGTGTGTGCAATTTCAATATATTTTGTCTACCTGTGGAACAAGATTGTGAGC  
AATGCTGATGGCTGCGTAGTTGTCACCGTACAGTTTCATAGGCATAGTCTCTGTTCTTCTTAGTTCCTCCAAAA  
TTCATTTAAGCCACACCAGTTTACATATTCCATGTGCTGTAGATCTATATTCTGCTTTAGTACTGATGCGGG

>TCONS\_00026153

CAACAGACTCACCATATAAATATGCATGAGGTTCAATTGAGCCTAAATATAAAGCTTCACCAGGGTTGAGTTT  
CACATAATTTAACAAGTATGCAGCTAAGACGCCAACATCAGCTGGATACTGCTTCTCAAGTCTTAAAATCAGT  
TGTTCTTTGTCCGTTAGGTGCCTCGCCTCAAGACTGACGAACCCACATAGAGCCTCAAAAT

>TCONS\_00026174

GCTAGAAATTCGGGTGGAGCTGTTCTTCCGATAAGTGACCACACATTTTCCATCACTGTCTTTGCCCATGTGCT  
CATTGTGTAAACTGCTATAATTATAGCTCCAGTAGGATCAATCCACAGTAGAAATGGATGGCTAAGACTGCT  
GCCGCTAACCCGATTGAGTTGGTAATGACATCAAAGAAATGGTCTTGAGCATAGGCCCTTACAATTTCATTTT  
TGAATCTTCGGCAGTAGATCAGAAGCATAAACTTGACCACAGTGACAGAAACCATAATT

>TCONS\_00026344

GCAAGAAAATAATTATTGAAAGATAATTGAAATGTTTGTCTTCGACTCAAATGAGCATTGAATACAGCAAAT  
TTATTCAGACGGCCGCTGTCCCAATACTGAAATATCCTCGTAACGTTCCCAACATTGTTGTGCTCCCAGAGCT  
TATGAACCCCATATCCACTGCCCGTTACCAAGGAAAGCGCCAGCGATGACGAAGGTGACATAAACAGAG  
TTGCGGCGCATAAGCACTCTGTAAAGCCCTTCAAATAGGCCGCCTCTGCTTCTTCTGGCTGCTGTCTCCATTGC  
TTTCTCAGGAGATTTCTAGCTCTGCTCCTTCGGAAGAGAAATCGGAACG

>TCONS\_00026359

TTGTCCTTGTAGCCCTCGCCACTTGCTTCAGCCTCTGAAACGTCAAATACTCACTTCCAAATCCTTCTAAGAA  
GCTCGCTAGCTTTTCAAGGTTGGTAATAGCAAGGTTATGAAGATCTTCCCCAGTCCAGACTGGACAAATAAGC  
AAGGAGATGATCATGACGGTTGCAACACTGACCATAATGGTGGATATCCGCTGCTTATCCAAATCCAAGTAC  
TTGTCACCGGAGACTGACACCAAATGAAGGTTGCGACAAAGAGCATGCATCCATAGTCATACCTCATTTCG  
ATATGTGGGTAAAACCTTGTAATGTACCTA

>TCONS\_00026402

TCCTTTGGCACCACCCATTTCCATTTTTAATCAACCAGGTAAAGGAGGTCCAAAAAATAGTCCAAAGCGAAG  
GTTGTCTGAGATGGAGCTAAAGTCAGCTACAACACATGTATTGTTAAATTGCCCTGAGGTCCAACCTTATTAT  
AGGTAAGTATATATTCGTATATATTACAGACTTTTATATTAAATATACCACTGATTAACTAATAAATATTATA  
ATGGCAATTACTTTGTGGGAACATATGGGCAAGATGTTGTTTATCCC

>TCONS\_00026403

TCCTTTGGCACCACCCATTTCCATTTTTAATCAACCAGGTAAAGGAGGTCCAAAAAATAGTCCAAAGCGAAG  
GTTGTCTGAGATGGAGCTAAAGTCAGCTACAACACATGTATTGTTAAATTGCCCTGAGGTCCAACCTTATTAT  
AGGTAAGTATATATTCGTATATATTACAGACTTTTATATTAAATATACCACTGATTAACTAATAAATATTATA  
ATGGCAATTACTTTGTGGGAACATATGGGCAAGATGTTGTTTATCCC

>TCONS\_00026409

ATATATCACTGAGTCTGGTCTTGTGTTGTCAAGCCAATCCAAGGTTTGGTGGCGTTTATCTGAGTCTTCTTCTG  
CTCAGTTAGTAACAATGGATTGAATGGACCAATAGCCCATAGGTTTAAGCCATCCTTTTCTTTGGCTACTAAA

TCAAGGTATAAACCTTCTATTACTCTGGATGAATTGTAAAGTTCTCCAGAGCTGATTTTCCCCATAAGGGATTC  
TTGTTTCCTCCACAATTCACATAACTCTGGAGTAGCGCCGCCGTTTTTCGACAGATGGAATGTCTTCGTATACTT  
CAGTTCCAGCTAGCAAAGGCTTTCCTTTGATTTCCCAGAACAAATGAAAACGTATGAAAAGCTGAGATACTATT  
AAACTAGTAGCACTCAGCATTGGAATTGCTGGCACATCCTCTACTACCCAAGTCATCATAGAATCATAAATA  
AAAATCACTCTCCGATGATTTGCACCTAAGAGTTGGCGTGCAAGAGAGCACACTGGCTCCCGGAGATGTATT  
GCTGCATAAAATGAAGGGATTAATTGATTAGGAACTTATGAGAAGCATTAGGATTTGGTGGGGGATTTTCA  
AAAGGTGGTGTAGGGAATTCATGAAAATATAGGTTTTAGCTGTGAGAGGGTCAAAACCATGGGGACACGA  
AACTTAGCCTGGCGAATATGAGTGGTTGCTCCAACATAGTGTACTGGGATATTATACGAGGAGATAAGTCTA  
GAGAGGTGGAGAAGCTGGTTGAGATGACCTTGTGCTGAAAGTGGCACCATAATCACAGCCACTTGTGCATCT  
TGAACACCATTTTGGTCATGGCTTTTTGTGTCGTAGCTCTCAG

>TCONS\_00026532

CAAAAGCTTATAACACCAAATCTAGCCATGGGCGAGAAAAGAAGATCCCAATACTAGGAGGAAGAATATAA  
CATTCTCATTTCTTTCCGCTCTTTTTCAGGCCAGCACCACCAATGGAGCCTTTTCGACGCTTTGCCTTGAGCTCC  
TTTAGTGCTTTTCTCTTCTTCTTTGCAAGGAAAGCCTTGTCAATTCTCGTCGTATTCTTCTTTTCACTCTT  
TGGGGCCTTCAAAGGCTTTGCCTTTCCACCTTGCTTAGAAGACATGGTTGATTTTCTAGGGTTAAGAGTTTGA  
TCTGATTATCGCTTAATTAGAGAATGGAAATACCTTCTCCTAACCCACACAGCTCTTTTGT

>TCONS\_00026574

TATGCTCTTAGAGATCGTGCTCTTCTATTAGTTATGCTCTTAGAGCTCTTCTATTAGTTCTTTGCAGAAAATGT  
AACATGTCCGTGGTGATTCCATTGCATGGTGGTGAATCAAGCTCTGCCAGCAGTGTCTAGATTCAACTTGCA  
GTATTTGTAGGGCTACCGTGCTGTCATCCTTATCTGACGTTAATGATCAGCAGAAGAGAGAGATTTTGGATAT  
CATAGGTTTTGACCAGTCATTATCTTTACTAGTATTAACAAGTCCGTCATCAATCCTACCCATATATATCACAA  
GTAGGCCATGACATCAGTGTGGATGGAGCTATCAGTTTGGTTTGAGATCTTGACTTTCATCGTAATGTAA

>TCONS\_00026575

ATGGAGTGCTCTTGTGTTGATTGCTTTAAGGTTTCTTTAGTTTCAAGCAGATCTAGCTTTGGCTCTTGATAGT  
GGTGCATTCTAGTAGGTCTTTTGCAGGAACCTTTAACATGTCCGTGGTGGTTTCCATGCATGGCAGCGGGTATA  
TTGTTTTTTTGGTTCTTATATTGAGTGATATATCTGCAGCCATAATCAATTACTTATATTCTATGGTGTGTACTTA  
TGTCTGATCAAGCTCGTGCCAGCAATGTCTAGGCGTTCGTG

>TCONS\_00026666

GATGCTTTATCAGATTTTGAGCCTGTTCTCAAGTTGGTTCCTAGTAATTCTGTGGAAGCTGTGAAAACAGAAA  
CAGATGAATCTTGTCTACAAAACCACCACCATCTTCTGCCTCTGCTAATCAGGTGGTTGTTCTTAGAGTTTCA  
CTGCACTGTAAAGGATGTGAAAGGAAGATGAGGAAACATATATCCAGAATGCAAGGTGTGT

>TCONS\_00026811

ATATAACCGATGAAGTCTTCAACTTCTGCTGGAGTGAAATTGGGGAAAGTTTCACCAAATTTCTTTCTAGAG  
CAAGAATTTAACAAGCTGCGTACTCCAACCACAAAAGATTTTTTCAACTTTGAGTAACTTGTGTTCTCCATTTT  
CAGCAATGACGGGAGACGGGAGACTGAAAATGAGGTGAGGTCAGAATTTTGATTTTATAAAGTTTCGACTT  
TATATCCGTTTGGTATATTTGGTCAGAATTACTGGATTTGCAGGTTTGGACCAGTTTTTGACGCCCTTCAAAC  
GTAATAATTAAGGAGATATTTCAAAGAAGTAGGAGGAGAGAGGACGGCCGGACAGAGTACGGGGGAGAA  
AGGCGTCGCCGGCGTCGTCCCGGCAGTG

>TCONS\_00026875

GATGCTTTAACAAGAGCAATAGGAAAGTAGAAAGATAAAAGGAAGATTGCGAGATATTAGATCTGACGGAT  
GTAAATGAGTATAGATCTCAGACGGATAAAAAATAGTGGCAACTTTAATAACAGTGGCCAATGAAGGTGG  
CCGAAGTGATGGCGCAGAGACGTTGGAGTCTACTGCACATAAAGTGTGGGTATCTTCATGTGTTTTTACATGT

AAGTCATAGTATGAGATTTTGTACTTCATGAATATATAAGCGTTTTATGTTTTCTCTTCATACTTTAATATTTTA  
T

>TCONS\_00026877

TTAGAAATTTGAGAATTTGATATGCTCATATCATGAAATGTTTAAAATGTCATTTCGTATTGTGGGACTGTTGTT  
TTTATGCTGAAGTATATTCTTTTCACAAAAATAAACTTTAAGGTTTTGCAAATTGGTTAACACGTTTAAAGTGT  
CCAAACAAAGATTTCAATATTTGAATTCATATTGAGATCCTAATCCTCTCATCCAAACAGGTTCTTTTGTCTCT  
GCTTTTCCGTTGCTACAGTTTGAAGCGAGTTGCACAATGCCGTCTCTCCAAACAGCATTGCCTCCTGAACTAG  
CCAACAATGCTATCCGACTTTATCGTGAGTGTCTCCGACGAGCAAAATATATTGGTAGCAAGTGCTGCGAGG  
GGGCTCATAAACCACATGTTGCATGAATCTGAGAAGATGACTGGCCGGAAATTCAGCCAGAGTTCTTGAAAT  
TGCCTGTTCCAAGCAAATTGGCTTTTAGGACCAGACTGAAAGTTTGTTATTAGCCTGATGTTTTATTAGCATAA  
TTAGTGCAGACCATAACAGCCGTGCTAAAAGTTTTACGAGAAGTTGAGCTTGTGATGAGGCTCATTGTAATCTG  
AAGAACGTGGCGTCATTTCTGATTATCCCGTGAATACATTTTTCCA

>TCONS\_00026912

AAAAGAGAAACATTTCCCTTCTGTCACTAAATTCCTCTCTAACTGGCAGCTCCACCATCCCCTCATCCAACA  
CAAGTAAATTTACTTGAGAAAAGGGCAATTTTATTTCAAATCTAGCACATGGGCTGAAAACCTAAATTTGGAA  
AAGAAGATATGAAACAAAATTTGATTTATATTTTCTACAAATATTAGGTCAAATCAAATAAATCTTCGGTATG  
TATGAGGGTCCATGAAAACCTTATCTTGCTTTAGGCCCCCTCATGACCTGCATGTTAAAAACAGCATTCTGTAA  
AGATGCATCTGATCATGAACCACCAGTTCCAGAAGCACCCCTCAGCTTGTTTTTCTCCCGTTGTTTCTCCCGCT  
TTTTCTTGTTTTTCAATGCATTCTTGCTCAGCTCCCCAGAAGAACTTCCTCCAAATAACTCTGCTTGAACCTCAG  
CAGCAACCTTCGCATGAGGTGGACGATAAGCAGCAGGTTTTGCTGCAGGAGGATTGGCAGGTGTAGCCTTGG  
GAACGGCCTGGGTAGCTTTTGAACGGCCTGGGTAGCTTTTGATCCTTTCCCTGGCGCTTTAGCTTCATCTATT  
TTCACCGAGCCAACCTGCCTTCACAAGGTCTTCAATGTCACCAAATTTTTCTACTGACTCTGGCTTCCAATCAAC  
CTGATACAATCTGTCAAACATCTTCTTGAAGTACAATGATCCATTGTGGTGAAAAATTTTAACCCCATATCA  
ACTTGAAGGCGTGGAGCTGTTGTGGCAGTCATAAAGTACCGACCATCAGGAGACCATTCACTTGTCACTGAC  
AATTCAGCCCTTGTAGTTCCAAGCTGCTGCTTTTCCTTGTAGTCCCAGAATGCCATGTCTCCTGGTAAGTTACC  
AAAGCCTGCCAAGCATATAAAGTTCCCCAGCGGATTCCATCTGATAGTGTTGTATGGGCCTGTTCCAAGCTCA  
AGCAGAGGATTGCACTTCTTGTCGAACACCGTGGCCATAGCAGGCATAAAACCATAAACAGCTGCAAATTCT  
TTACCCGAATAGGACCATTGAACATCATGAATAGGGCCGTCTTTACGGAGAGGAACAAGCCCTTCATGGGTC  
CCATCAGTAGTCAAGTAGTTCAACTTTGATTCTCCGTAGTAGCTTTGGTTTGTTTTATCAACATCTGATTGGACC  
ACCACTAGAAGCCCTGTAGAACCAGAATTCAGCTCAGTTGCACAGTTGAGCAGCGGAAGAAGCTGCGTCG  
AGCAACAGCTTGACTTTGTAAGTCCTTTCCACATGCATATATCTGAACACTGGCTGGCATTCCTTGGATTCTG  
GAACAAATGCAGCCACGTAGGATCCAGGGGCTTTAGAAAGCTCCAATGCAGCAATCGCAGGAACCTCGCAGC  
CGATTAACAAATCCCTTAGAGAAATCCCTAGGATCAAAAAATTGGATCTCATTGTGTTGCCAATCGACATGCA  
ACAGTTTCGTCAGAACTGAAACGTACAGAAGGCCATGTAACTTTTGTCATATTTTTCTGGAAGAGTTGGTAAA  
CATATTCACCATTTTTCTATCTTCCACAAGACCACGTTCTTATCCTGAGGAGATGAGCATTCTGGAAGGTCTGA  
AGATAAGTTCCACAAGGAGAGATGACAGCTGCAAGAACGTTTGGGACATTAAAAGACCTAATCTCTTTCAAT  
GTTTTGCAATCAAAGATGCTTATTATGGAGTCTGATTTTGTAACCATGAGTTTGGACCCATCTTCACTGAACCT  
TGCATGTTACAAGGAACCTATCAAGCTTGATACCAGGTTGACCGCTTGGGAAAGGTGGTCCATTCCATAT  
AGCAAAACCCCTCTGGTTCTCTTACTAAAATATCCAACGAAGGGGAAGGCTCTACAACCGCCATCCT

>TCONS\_00026949

AGAAATTCCTCTTTATGCTTTTAATATTCTTCCGCAGAGGACCGTAATGGAAGCAGTGACTGCGATACTTGG  
CGGTGGGCTGCACATTGGTGTAGTTTTTTAGGGTAAGAAGGTTAGAGATGACAACAAGACCCTATTGCAGGC

TGGAATTTCTCATGATGACAACTTGATGCTTTCGGTTTTACCTGGAGCCTAAGCCCTCTCGAGCTTCCTCAAC  
TCTAGGTCCAGAAAGCCATTCTCGTGTACTTCCTTGTGACACACCTCAACCACTAACAAGGGGCCCCGCCTACG  
CCTACTGTAATTTGTAATGGCATAACGACAGGGGACATATAATGCCTTCTCAGATCATCCAGAACCAAGTCTGA  
ATTATAACTTCATTGAAAGCGATCATGATTAGCTCCATCCCCTCCTGATGCC

>TCONS\_00027060

TGAAAAGGGTGGGAGAAGAGGAAAAGGTATAGAAAATTCAGCTAGTAGCTGCTGAAAATTAGAGCATAACC  
TATCCAGGATATGCAGCTTTGTCTGTTTAAAATTCAAAAATGTGATTCTTTTGAGCTCGCACAAAAATTGCTAT  
TGTGCTAAATATGATTGATATGAGCTGTGAGCTTTAACAACTCTACAGTGAAAAGCTTTAACAACTCTGCT  
TTTCCAAAACAAATTTCCATTGAAATCTGTTCTTTAATTTTATTGTTTGAATTATGTTTTGTTCATTTTCTTTGTT  
TTTCTTCTGTTACAGGCTTATTTCTTCTCTCTGTGGCACTGTTTTTGCCGAGGGTCTGCCTTGAACCGTTGAA  
AAGGAGGTTCCGAGGTTTCGTATCACATTGAATCTGCTCAGCTGAATGGTCTGCTGCAAAGCCTCAAGGAAAG  
AAGAGAGCAAAAAGAGAGGCTAAAGAACCTCGCAACTCTGTGCTTGATAGGCAGAGAATAGGAAAGAGGG  
AAGAAATGTCACCTCAATTTTAACTCTGAAGGGACCTGATCTACTGAATAGCTTTTAAACAAGGGATAAAATTT  
GGCAATTGGTTTACTCGCCTCAGAGACTGCATTGAAGCTTCCAAGATGGTTGAACGCCTTCTGTTATTTGGTGC  
CAAAATCCATTAGCTATGCTGTTGTACCTCACAAGAAGGCCAAGAGGGAGTCCCTCTTGCTTATCCCCATCTA  
TCTCATATGAATCCTATTATATCTTCAGAAAGCATGAACTGATGATTAACCATGGTTTAGATACTATTCTTGGT  
TAGTTATCATGTTCTCATATATGTGTAGATTACCAACT

>TCONS\_00027074

AATCTTGATTTTTGTCACTACTCGAGGTTTTATCTACAAATATAATAGACATAGTTGCAACAATAAAGCTATTC  
TGTTTAAACCAGAAAATAATGAACATTGGGATATACCTCAATTGCTGTAATAACAAAACATTGAACGTAACCT  
CCATTTTCTAATATAACTTGACTGAGCTTTGGAGACTGAACTCTATCATAACATGGACTGTTTCATTTGGGAAAC  
AAGTCAATGAGGTCCAAGCAGGAGAACGAAATGATCTTTGCCTTACCTCCCAGCATATTGGTAATCTCCCAA  
GCATTTTGTGACAGCCTCATTGGCCTTCTGAGATTCCCTTTCTCCTCTTTTTTCTTCTCCCTTTCCACATATTCCT  
TCAACAGCTCTTTAGCCTGAACCAGCTTGGAGAGCAAATTGCGATAAACATCAAGGTCCCTATCCACACTTTT  
CTTGTTTATATTCAGTGAAGCACAAAGCTTTTCTAAGATGGTTGGATCAGTTACATTTGCCAACTCAAGTAGGC  
GAAAGAGACCAACCGCAAATAGCCGACTGTAGCAGAACTATCCTTGGTTCCAGCTCGCTGTGCAATATCTT  
TCAGAATGTTTTCAACTTCTCCATCTCTGGATGAGAAGTCAACTAGCGTATTGGCATTGAGTACGAGCCCAT  
TCTTCAAATTTTTGTGCATCAGCTCTGTATTGCACAGGATCCTCATTGAGCGCCTCTATATATGCTTTGAAGAT  
AGCATCACGATCCTCTTCACTTGGGTAGCCTTCATAAGTTGATCATATACAGTGACGAAACCAAGCGCAAA  
CACGGGATCATATCGGTAGGATTTCTTGTACTTTATCAAATGTTGTTGCACAATTAGCTCTTGTAACACTGTGT  
TGTAGACAGTTGGAATTGGACGCTTATAAGCCTTCAAGAAATTCATTTTAGTCTCGGCCACAGTTGGCAAATC  
TGGAACAATAACAATATAATGAGCTGCATTATTGCCTCATAAAATAAACATATGCAC

>TCONS\_00027089

AGTTTAATTGCAAAGGCTATATAAGCAATAGGACGAACAACAGGCCTGTTTGCTTGAGATTTGCATACACAA  
ATTTAATGATCATTCCAGTAATACTAAATAGAGAAATCCACTTCAAAAACACATCTCAAATTAATACTAAAACC  
AAAAAGCCTAACAGTAGTTGATCAAAATGTAGGCACTTAAGTACGAGCTGCAGTAGGAGCTCCGGCAGGGC  
GTGGAGCTTGACCAGGCTTGGGAGCATCATCCCTTGGGCGTCTGAAGCGCTGTGGAGGCTCACGGACCCCTCT  
ATCAGTAACAGAGCGGACCCTAACAACTTTGGAGTGGATGGCACATGAGACACAATATTGCATCTTCAAGTA  
CAGCTTAGGAAGAGTGTACAATTCAAAAGCACAAAGCTTCCTGAACATCCCTCACTGCTGCTTGCTCAACGAT  
GTTCTCACAAGGAACCTCTTGATTGCTTTGTCCTTAGGGCAGCACTTGCCGCAGTTAGAGCAGCGAATGAAT  
TTAGTGTGGCCACGTCCATGCTTGTACGACCTCCGTTTCTTCTTGAATGTCATTTTGGCCGGACGAGTTGTA  
GCAGCTGCTGAGCAGTGGATACGATGGAACCTCTAATGGCGACCACTCTGCTTCTGAAGCTATCAGCTACT

>TCONS\_00027300

TCAAAGCTGTTATAAAATCGCTAGTAAAGTAATAGCAATAATCTACATCAACTTGTATCTCTTCTCCTGGACT  
CCAGTAACTCCCATTGTATCTCTATGATCGTGTGAAGTGGCATCTCTATATGTGGAATTCGTTCAAAGGCCT  
ATCAGCAAAATAAGCATACAAAGCCCTCAATACCGCCTGATGTGATATCACTACCACGGGTGCTCTCTGTCTT  
TCAAGCTCTATAATCACTGGCTCCAACCTCTGTATGACATCAAGGTAAGACTCGCCTCTGGGGTATCTATACC  
TCAGCTTGTCATTTTTACGTGACCTTCGTTTTTCATAGAGAATGGGGAAGAATGCATCATACAAGGTTAAGAA  
TAGTTGTGACATACTCGTATTCTTCAGGCATATTTTTCTTTATTTTCCTCATAAGTCATTCCATCACATACACCAG  
CATTGATTTTCATCAAGGGCTCGCCATTGTATCTTGGGGAATTCACCAATTGGACTAGCTGTCAAAACTGTTCTT  
TGCAGTGTGCTGGTCCATATAGAAGCAGCCTTTTCATTTTTTCAGTCGTTTTTCAACAAATTGGCAAGCTTCTTC  
GCATAGACCTCCCCAGCTTCACTTAATACAGTGTCAACCACCAATTCTGCCTCTAACATTGTCTAGGCTCTCTCC  
ATGCCTTGTAAGCAAAATTGGACGAGGCGTAAGATGTGTATTGACCTGCATATCAGATAAGT

>TCONS\_00027301

TTCAAGCCAGTGAGCTAAGACTGTTGTTTACTGTTTCATTTCTACTTCTGCACTGAAGCAACTGTTCCCTCAGAC  
TCCGTAAGTACTAGCTCGTTTAGTCTCTGGATGTTCTTCTCCTGTGATAAAATAATCTTTTCTTTAACAGCTTCTTCTCT  
ATTTGAAATCTGTTGTTGCTTCTGAGATATACTAGGACTCGGTTGACATCACTCACCAATTGCTGCTTCCATT  
CCAACTGAGATGTGATTATGAGTACAATCAACAGAAAAACAAGCAGTATTGGTCTCGACATCATTTACAAGC  
TAATCTCACACCACAAGATCTAATCTTGAAGTGGAGTTCAACTAACCATAGGTCTGTATTGTGAAGTACCA  
AAAAAGGTCTTTT

>TCONS\_00027375

AGGGGTCATCGTCCAGGCCTAGGGTCCTGACCAAGGCGTTGACTTCCTGAAACTACTTGTGCCAAAGTAGGG  
AGCACACGAGCCGAGGGTCTCGTTGCTGAGAATTTACTTAGCCATGCTAAGGTATGAGACATGAGCGCTGAG  
AACCATGAAGCGAGTGGCACCTCGTGGATTGGGCCTATTCGATCAGGTTGGGATCGAACTCGTGCCGATCAC  
ACGGTGACTGAGACAGAATTAAGTCAGGATAGTTGGAAGTCCCAAAGTAAAAAGTGAAGTATTTTTTTT

>TCONS\_00027376

ACCAAGGCGTTGACTTCCTGAAACTACTTGTGTCAAAGTAGGGAGCACACAAGCCGAGGGTCTCGTTGCTGA  
GAATTTACTTAGCCATGCTAAGGTATGATACATGAGCGCTGAGAACCATGAAGTGAGTGGCACCTCGTGGAT  
TGGGCCTATTCGATCAGGTTGGGATCGAACTCGTGCCGATCACACGGTGACTGAGACAGAATTAAGTCAGGA  
TAGTTGGAAGTCCCAAAGTAAAAAGTGAAGTATTTTTTTT

>TCONS\_00027453

ATCAAGCCACAGTAGTTTACAATATCCCTAGACCCTGGACCTGCACCACTATTTTCAGTCTCTGGAGTGGGAT  
GCACACTTTCTACAAAATCCCTTGATGATAATGAGTCCATAGATTGTACTTGATGAGGGTTACTCGATTGTCCC  
ATATCTGGAGATGGTTGTGTTTGTGGATTAGGCCTAAAGGATGACGTCACACTAGAATTATCATGTAGTACTC  
CTACATTGCTGCATCCACGACTCTTTC

>TCONS\_00027454

CCTTTCTTATTATCTCTCTTTTTCACAAAGATTACCTGCACCACTATTTTCAGTCTCTGGAGTGGGATGCACACTT  
TCTACAAAATCCCTTGATGATAATGAGTCCATAGATTGTACTTGATGAGGGTTACTCGATTGTCCCATATCTGG  
AGATGGTTGTGTTTGTGGATTAGGCCTAAAGGATGACGTCACACTAGAATTATCATGTAGTACTCCTACATTG  
CTGCATCCACGACTCTTTC

>TCONS\_00027489

TCTCTCTCTGAAAAAGTTGAGTACTTTTATAGTTCTCATCAATTCACAGAAGAAGATGGTTTTCTGCTGATG  
GCTGCATCAAATGATTTGAAAAGCTGAGTCAAAGCAGAAGGGGAAAAAAACTAAAGCTAAGACAACAAC  
CCCAATATAATCAATTCAATTCCCAGAGAAGGAAAAGACAAGAAAAGAAAGAAATTGATTTGAGCATGAAA  
GGTAAATAGGAAAGTGAAGGGACTGAAACAAGTATAATACTAGTACTGATCTATAAATTCTATAGATAGATA

CATTAGATCCTCAAAAAAGAGGCTATAAAGATGATGATAGAGCACGTGCACTTCCAGATTTCTATCACACCT  
GCAGGGTTCATTTAATATAGTATAAAAGTTCTGCAAGAAGGAAGAAGACGTCTCCTACGTACTACTACACAA  
A

>TCONS\_00027493

AGCCAAAATTAAGACTGTCCTTCAACCTTGTTCTGCCACCATTCCATGAATTTAACCTGTGAAGCCATGGTAT  
CGAGCCTATATAGCTGCAGCCAGTGGTTCGCGACTTCCTGTCCAAATGTCCATCCAAAGATAGCACCAGCTCC  
AAAAGACAATGCAGTACCATGCAGACTCCTTGAGTACTTCCAAGCAACGCCTGCAGTTGAAACAGCTCCAAT  
TAGGCCTCCTACAGCACCAAATTTTGCTGCTTCCCTAGCAGTCTTCAGAGTGGGTCCATGAAGAGGGTCAGAA  
GCAATGAATTCGTGACATCAGCTGGAGACCAAGAAGG

>TCONS\_00027660

ATCATCTTAATCTTGTGTTGCTGCACCTTGGTTAAGCTCTGCGAACCTCATACCAACACGCATTGAATGCTTCA  
AGAACTTCTCAGCACATCGCGTAATACAGGTCTCCTCTTGTTTGTCTAATGTTTTACGTTTGAAAGTGTCTACA  
CAGCCCGTGAAACATCTTTCCACCAGGGAATTATACATTCTCAAGCTGTCACGGATTTGGAGCTGGTCAATCA  
TAGAAGCCATTTTAAGCTTGTCTGCTTCAGGAAGATTATCCAAATCACCTAACATGCTTTTATCCATTTTTTGA  
GCTCTTTAT

>TCONS\_00027713

TGCCAAAGGTAAATGAACATAACTATGGTTGCCCAAGCTAATTCTAAAGAAACAACCTTCAATTGCCTTCATA  
TTTTGGGTCTGCCATCACATAATGGTAAGCAACCACCAGCACAAAGATAAATATACCAAGAAAGTTGGCAAA  
GAAGCCCAGGTCTCTGGTCGTCAATCATAGTGATACTAAGACGAAATGGAGAATTGGTGTAATAATTGGAAGAA

>TCONS\_00027895

GAGGGCATAAACACAAGACCCAGCATATCTCAGATCCTTGTGGCAATGAAAGTATCTTCTTGAGGCACAGC  
TTTATGGCACTGCTGTTTCATATGATGAAGCATATCCCTAAAGGCTCTCTCTGAGAGGAGATGCAACCAGGAG  
ATCAACAGTTGGCATTGCTGCTGGCTGTTTGATTGTGTGGAGAGTAAGCTCATCTTTATGCAATGGTAGTTAT  
AAC

>TCONS\_00027925

TTATGATCAAGAAAGAACAAGGAATAAGCATAATATAGAAGTGATAGTATGGCCGAAGAACAAGAGATGG  
AGTTCACACCGCATAAACATGTTTGGCACCAACTTTTGCACAAAAGAGGGATAGGATTCCTGTGCCAGCACC  
CACATCAAGGACCACTTTATCCTTGATTAAGAAGGAGTTCTTGTAATAACATTTTGGTAAGTCTTAGTTCTCA  
CCACATCCTTTAACATCTCCGAAGTGAGAGTATGAGTCGAAATAATAGTCAGCGCTAGTCTTGTCGCCCCCAA  
CCTCACACATGGAGGTGCTTCTCCTCCACCTCAACGTTGGAACCTTCCGTTATAGTTTCATCTTGCTCTTCATACT  
CACATTTTCATCTTGCTTCCCGAGCTCTCATTCTCATTGTTGCTTCGACAATCCATTTTTCGCTTCCAAGTGTAGG  
GGTTTAAGAAGCAAATGGTGGCTCCTATTTAGGGTTTATGGAAGGGGAGCGGTCAGCTCTATTTGG

>TCONS\_00027940

TTTCCAATTCTTCCAAAGTTAATCCTGCTTGGAATCATCCACTCCAACCTGCCTTAGGTATAGGGTGAGAGGTGC  
CAGAACCTGGTTCTCCTGTGACAGAATTATTGGGTTTAGTAGCTGATGGTTTAAAGGACAAGCAGGAGCTG  
CTCTTCCGGTCTCTGATACTCCTTCCAAACATTCTATAAATCTTTGCCATGAGAATATGGAAGAGAACAGGT  
AATAAATTAACGATCGGGACGAGGAACAGCGGTATTAAACACGCTACGCAAACCATTTTCGATTGCTTTAGA  
AGGCTTTGTTCTCTTTGCTCTCTCGTGCGTTGTATCGAGAAGAAGATGTGCTATCGAAGAAGATGACTCGTC

>TCONS\_00027966

CAACTCAAACCTGTGTCAGCATCCCAGTATTTTCATCAGACGATCTTTCCCCACCGTGAAAAAGTAATGGGTGTTG  
CGCACAAACTTAACCTCCATAACGCTATCAGCATGCGCGAAAAGTGACTTGTGGCAATCCCCGAAATCTAGA  
CCCCAAATCTTCACATTTTTGTCTCCAGAGCCACTGACAAGCAGATCCCCATCTGAAGAAATATCCAT

>TCONS\_00028044

AAAAAAAAACAATACAAAAATTTCTCATATCGAATTCGAAGTGCCATGCTATTATTACTTAGTATTCATATGG  
CGAAGGCATAGTCTTCTTTTTTCTCTCAAATAAAAAACCTCATTGGCGCCAAGCGTGAGGGAATGCTAGACGTT  
TGGTAATTTCTCCTCCGACCAGGATAAAAGATCCCATTGAAGCGGCTAATCCCATGCATATTGTATGGACATC  
TGGTCGCACAAATTGCATAGTATCATAAATAGCCACCCCAGGTATTACCCAGCCCCCAGGAGAGTTTATAAA  
CAAATACAGATCTTTGGTCTCATCCTCGATACTGAGATATACCATAAGACCAATAAGTTGATTTCGAAATCTCG  
CTATCAACCTCTTGGCCTAAAAAAAGTAATCTTTCTCGATAAAGTCGGTTGTATACGTCAACCCAAGATGCAT  
CTTCCTCTCCAGGACTTCGGAAAGGAACTTTTGGAACAGCAATAGGCATTAAATGAAAGAAAGAACTAAATA  
CTATATTTCACTTTGAGGTGGAAACGTAACAATTTTTTTTATTGTATTTATAATATTCATATTGGTTTTTATCGTA  
TTTATTTTATCCATAGATTATAAAAAATTCATAAAGAAAGACAGAATGAATAAACTCAAATTATTACGAATAG  
GTCTTTCTAATGATAAATAAGTATGGACTCATTTCGTTTCATAGAAAATGGGATCAACTCCC

>TCONS\_00028059

AAAAAAAAAAAACTAAAAGCTCTCTTCTGATCAAAGTTGACAAAACCAAACAAGAACTCTCTGCCTGCTTACT  
TTGCAGCACTGTGCTTAGCTTTCGAGTGAGATTCCAGAGCATTTTCAGAACCAAAACCCTTGTTGCATGTCTTG  
CAGAGATGAGAGCCGCCTGATTTTGGAGTCTGCTGGTTCTTGTTTGACAGGAGATTACCAGCCTGTTTGGAG  
GGTGAGGGGTCGCAACATGGCCGCTACCTTTTTTGGCCATCAGTTTTTTGAGGAGTTACAAATTTGCCTTCTTA  
TCGGGGATAGGTGTTTTTGTAGCCGAATCTGCCTTCCTCTTTTTTGGCAGGTTACAGCCTTCTTTGGTTTCTCCTCCT  
CACTCTCATCAGACTCACCATCCTCATCGCTCTCATCTTCACCCTGAAGAT

>TCONS\_00028060

TTACTAGGTTCCACAATCTTCACCTTCTGCTTACCTGAAGCAGAATCCTTTGCAGCATTAGACTTCTCTGCCTC  
CTTAACCTTAGCCTCAGGTTTTCCATTGTTTGCAATAGTGAGGGGGATGTCCTCATCAGACTCTTCTTCATCGT  
CTTCATCATCCTCTTCCTCCTCAAACGGGTTAGTGGCCTTGATCCAAAAAAGTAGACGCTGCCATTTTCCAG  
TTGTGTGATAATTCAAAGTCTCTATCAAAGACCAGGTCAAACCTGCTGCTGAGGCACCTTATCCGAGCTTAGTG  
TCCCAAGGACAAGTTTCTTGCCATCAATGTTACGGACAAGCAGACACTTTGTACTTTATCCTTCTTCAACTCA  
CCGAGAGATGCCTGTGAAAGATGCAAAACCATCCCATCTCCAGGCTGTACAGTTAAAGGCTCTCCACTTTTCA  
CTTCAGCACCCCAAACTCCATAGCTGCTGTAGGGTTTTAGAGAAAAAGGAAATTAGGGTTTTGGGAGAGAG  
AAATGGAGGCAGAAAGAGAGAGGAATGAAAATGGTAGGGTATTTTGTGTTTGGG

>TCONS\_00028064

GGTGCAAATCTGCCATTAGTTTCCACAATAGCACTAGAATATTTTCGTTTGAATGTAACCTTCTTGCGATGAGGT  
TTCTTGGGAGATGTGAGGGGTTACCTCTCATCTTTCTTTGCTGTTTCTTTTGATCGTATATGACTATGCATTTGT  
AACCATTGCTAGGGATGAAGTGTACATTAACAACCTTTCTGCTGTATAGAGTGCTGAAGTTTGATATCAATGTG  
CTGTTTGCAGGCGTCTGTTCTGTACATATTCGTTTCAGAATGTCTTTGTAGAGCCCGTAATTTTTTTCACAAATTC  
AAGCAGCCATTTCTCTGAGAATACCATTGCAATTGGCTTGTAACCTTCTCCTGGAACATTTGTTTAGCCATG  
TGATTTTGTAAAGCCAGCAATAACAGTTCTTTAATTTCTGTCCAGAAATGATTTTGTATGTATAAGAATTATA  
ACGGGAATTTGTATTATAGGAAAGCACACTTCGATGTACTTATTTTGTAGTTAGCGTACATGCAATTTCTGCCT  
CAGATGTTTCCTAATAGAGAAATAGTGTCTACAATCTCTAGATCCATTATTGCTCAAACATAAGGGTTAGTGT  
TCTGTTCGATGAGAGCTAGCTTAACAATGTGAATTCCTAATGATTACTTAGATCTAGTTTTGGACGTTATTAAAA  
CAAAATGGGGTATTATCACTTTTAGCCCG

>TCONS\_00028101

ATCAAACGGCTGGATTTGAAGGTGAGAAGTGAGGGAATGATGTAAGAGTAGGAGTTAGTTGTGGGTTTCGTA  
GTGGAGTTTGGATTTGAGGATAGGATTGGAATTTTGAAGTTTGTGGAGGGCATTTTGGAGAAGTGAAATGTCA



GGGGATTTTGATAAGAGGAGAGCTAAGACTGTTATCCCTGTGCCACCGGGAACCGCCTTGCACCAGCTGTGC  
TCCGTGCTACCTGCCGGCCGGGTTTCAAACCTCACACGGCGGAGCTGCGGTGGTG

>TCONS\_00028181

ATACTGAATTTTCAAAAAATTAAAAAAGGTTTAACCAAACCTCAATCTCAAGCCTTTCCAATTCCAGAAATT  
TGAAGTGAAATTCATAGAGTCTACATGTACATGGCAATTTAAAGCATTATTTTCAGAGAGTGTTTTCTTAAT  
AAGTGGCATCTAATTGACAAGTTTCTTTGCACAGGCATTCTTACTATTCTAACTGACTACATCATCTACCAAAA  
TCCCAAAGTTAAATAAGCTGCATTGACAGTCCCTTCTAAACCCCTCAGCACTGAAATGTGCACAAATGACTCC  
CAAATTGCGACACAATATCCACTAATGCTCCGTAACCAGCTACTGCTGTTACCCCTGAAGGATGTAAAGAAA  
TGGAAAACAGTGACTGAGGAGCACATGGTATCTGTGAAATAATATCTCCGTTTCAGGTCAAAGCGACTAAGCA  
GGGGCTCCGCTCCAACCGCTAAAACCTTGATTATCATGAAATATGGCATCCTGGATAGCAGCAGTTGTCGTGAT  
TCGTGAAACGCATTACAAAGCTAGAAGGTTCCAAACAGATAAAGACCGGCCACTTCCACAAGCCAGCCAAC  
TCTCACTTGCATCAAGAGCAATGCAACTGACATATGGAAACAACCTCCCTCGACCTCTTATCCTTATGTGGATC  
AATTATTTGAATACACTTACCAGTTCTGCAATCCCATATTCGTGCTGTCCCATCCTCTGAACCAGTTATAACCT  
GATTGTGAGAATTTGCGCAACAATGCAATGCAAGTAGTCTGAATGCCCTTTCAAACCATCTTTATTTTCATTC  
TTCTCCACATCCCAGCAGTATGCACAAGAATCACCAGCAGCAGCAAAAATGGATCCAGTCTGAGTATTAACG  
GCCATGCAATTATTCTCTGGAATTGGAGAAAGTGCACCCCATGGACCTTTTTGTTGAGGATTGACCAAGTCAA  
GAATTGGCTCTGATGTGCCTCCTTGACCGGCTCCTTAGACCCCAACAATTCTTTCCATTTCCATCCACGAATC  
CGACCATCATCACCACAACCTGCATGAAATCACCTCAATAATAGTGAATCCTCATCGTTGCCATAAAATTTAAC  
ATCATAAGCAGGCCCATCATGTCCTTGTACCAGCCAACCTAGATTACGCCACTGGCACCAACGAATTGCCCCG  
GGAGCTCAAATCGAGGCAAGAGGAGATGGAGTAAGAGGCGATAGTGCCGTC

>TCONS\_00028182

CTCAATCTCAAGCCTTTCCAATTCCAGAAATTTGAAGTGAAATTCATAGAGTCTACATGTACATGGCAATTTA  
AAGCATTATTTTCAGAGAGTGTTTTCTTAATAAGTGGCATCTAATTGACAAGTTTCTTTGCACAGGCATTCT  
TACTATTCTAACTGACTACATCATCTACCAAAATCCCAAAGTTAAATAAGCTGCATTGACAGTCCCTTCTAAA  
CCCCTCAGCACTGAAATGTGCACAAATGACTCCCAAATTGCGACACAATATCCACTAATGCTCCGTAACCAG  
CTACTGCTGTTACCCCTGAAGGATGTAAAGAAATGGAAAACAGTGACTGAGGAGCACATGGTATCTGTGAAA  
TAATATCTCCGTTTCAGGTCAAAGCGACTAAGCAGGGGCTCCGCTCCAACCGCTAAAACCTTGATTATCATGAA  
ATATGGCATCCTGGATAGCAGCAGTTGTCGTGATTCTGTGAAACGCATTACAAAGCTAGAAGGTTCCAAACAG  
ATAAAGACCGGCCACTTCCACAAGCCAGCCAACCTCTCACTTGCATCAAGAGCAATGCAACTGACATATGGA  
AACAACTCCCTCGACCTCTTATCCTTATGTGGATCAATTATTTGAATACACTTACCAGTTCTGCAATCCCATAT  
TCGTGCTGTCCCATCCTCTGAACCAGTTATAACCTGATTGTGAGAATTTGCGCAACAATGCAATGCAAGTAG  
TCTGAATGCCCTTTCAAACCATCTTTATTTTCATTCTTCTCCACATCCCAGCAGTATGCACAAGAATCACCAGC  
AGCAGCAAAAATGGATCCAGTCTGAGTATTAACGGCCATGCAATTATTCTCTGGAATTGGAGAAAGTGCACC  
CCATGGACCTTTTTGTTGAGGATTGACCAAGTCAAGAATTGGCTCTGATGTGCCTCCTTGACCGGCTCCTTAG  
ACCCCAACAATTCTTTCCATTTCCATCCACGAATCCGACCATCATCACCACAACCTGCATGAAATCACCTCAAT  
AATAGTGAATCCTCATCGTTGCCATAAAATTTAACATCATAAGCAGGCCCATCATGTCCTTGTACCAGCCAAC  
TAGATTACGCCACTGGCACCAACGAATAAACCAAATTCACCAAATAATTATCAATTCAAACCAAACCTTAC  
CTTCACACTTCGAAAACATTGAGAAAACAGGAACCTTACTTGCCGCGGAGCTCAAATCGAGGCAAGAGGAG  
ATGGAGTAAGAGGCGATAGTGCCGTCGCTAATACCGGCGACGATGAGGTCCGGATAAGAATTATGTTTTGGA  
TTCGGGTTTCGGGGCGAATGCAGTACGGAAAACAGTTCCGGCATTGGGATTCTCTCTCCAGTAAAATGGAGTCTC  
TGTATACGTCTTCGTCCCAGTTCCTGCAGTCCATCGCTGTTACCATCCTTACCAGAATATTTCCGGTGTT

>TCONS\_00028236

CTTTGAGATTTTCCAGAATGTCATAAGCAGACTCCATCGACTGATGCTGATGTTGCAGAACATTTGACATGGA  
TGCCAAAATGTAACACCGCGCCATCTCATCAGCCTTAATCCATTTCTGGTAAGCCTTTTGTTCATCATCTGTGG  
CATCATATCCAGGTTTTTCTGGACACACCTCATCGAGCACAAATTTGTACTCTTCAGCAA

>TCONS\_00028253

CTTGATCTAACTGTATGAGTTTTTTTTGAAGTTTAAAGAACACATTTTTCATCTCATCTGTTACTACCTGTTTAG  
TTTCCTTCAAAAGATAAGTTAGGATTTATAGTGCCATACTGGTCGTTATTGTGATCTATATTTTCTGTCATTA  
GTTCCGCTTCAAGTTTAATCTGTTCTATTTTATATATAAAGTTTCTTTCTTCGCCTCTATTATGTGATAATTTCCA  
TGGGCAGGAGGTTTGGACATATTGGTGAAGTGTCCTTTAGCTCTAGAGGTGAACAAATAGGCTCAGGTAACA  
CAACACTTCTTGGAACCACGTATGCTTACAGTTTATCCAAGTTTAGGTTGTAGAAATTCTTTACCTACGGTGGA  
GTACGGATGTTTTGAAGCTATTTTGCTGAATACTTCTTTCCATTTGGGCCTTGCAAAATGCGTCCTTACCTGCA  
GTAGAATTAGTTTAATTAGTACTAGCTGGAGAACGATTCACCTCAAGTTTGTCTCTCTATTCTGTGTTGTGGT  
TGAAGACTTCTCATGAAATTTAGCAGCTTTCGAGTAATAGAACTTTCTCTATCTAGAACATGGCACTCTTTAA  
GCTAAGCTGAAAACCTGTTCTTTCTTATATGTTTCTTTCCATTGCTCTTTTAGAGGGTTTGGTTGAGAGTGGTGA  
TGGATCATACCTGAGTGCCAGATAGGATGTCAACACCATGTTTTGCATGGTTGAGCGCCTGGACCATAGTGAT  
GAGAGTTGACCTGGCATCGCCCTCTTCATAAACACTCGTTAGATAATTGTGCATCTCTATCAGACCCTGTTTCA  
TTGAAATCATCAGAAAAGATATAGCTGAGCCAATTAGTTATAGATCATAGCAGAATCCCAGAAAGGAGGAA  
AAAGTGTG

>TCONS\_00028352

AGTACTACCAAAAACCTAAAATTTTTGAAGAAACAAAGAAATTTACTTGGTTAATGCAGCATCATAATCTGT  
CTCTACACGGTAATTAAGCATCATCGTAACCACATTCTTCTTTCAATAGCTTCACCTGGCCAAGTGGAATTT  
GAGGAAGAGAGAGGCCATCATCTAGACCACTCAATTGAGTGCGTACATATGGATCAATGGAGACATAGAGG  
ACTTGGAATGTCACATGTCCATCTGGAATGGAATCAGCTCTTAGCGATAAACTCACAGTACGTAGCTTAATAT  
GCTCAGAATTGGGAACACCTGTGCGTGCATAACTAGCAACGTACCACTCTCT

>TCONS\_00028401

CCTCATTTAGCACATTCTTCAGCTCGTGTTAGTGCATCGGTTATAACATCTATTGTCCAATCCTTGACATCTTCC  
ATCTTCAAAGGTTCCCCTGTCCTTAGCCTTGCAATTTGGACGAGCAAGTTTAGATTCAAATGGAGTTCTTGGTCT  
CACGTCTTGAATTGATTCCCATTCCTCACGGTAAGCATCCTAACTGACCCTTGACCATCAGGCGCATTCTTTA  
TCTTTCTCTCAATCATTCTTGAGACTTCGAGTCATCATAATCATGAGGAGCTTAGCAAAAAGTGCGGTACC  
AACGACAGTGAGTATCATTGGCATAGTAGCTGTGTCAAGCCATGCTCTTGATTCTGGAACCTTGAACGAATAAT  
TGGTTCTTACGAGGATCTTTTCGTTTCTTCTCTTCAATTTAGCAAGATTCTTTAAGGTTTCACTAGGG  
CGATCACGAGACAACGTGTGAACTTGTCTACTAAATTGGCATAATTTTCTACGAACACCCAGCATAATCGGA  
CGAAATGAGGGG

>TCONS\_00028469

GAATAATAATGAGGCTAGGCTTCAATAATCTTCATTCATCTCCAAATTTGAACCATTTCAAACATTGACGGCG  
TTGCAAAGGAACATAAGCGACGACGTACACGCAGCGTCGCCGCCGTGTCTTCTCCTCCTCCACCTCCACCA  
CCACCTCCGCCGCCGCCGCCAACAACACCCTTTCATAATAATCCACACAAAACAACGATAACGACAACCTCC  
ACTTCATGGCGCGTCCAATAAACCTCCTCACAACCTCCGAATCAGAAGCTGACTGATCCACTCCTATTGGTT  
TCCACTTTCGCAATCGATTCAACACTGGCCTAACACACACCATGTACAGCCGCCGGTACCCTCCTAGCGCCAA  
AACCACCGTCCTCACTCCCTCCGGCGGGCGGACACGTGGCGAAAGCAGAGGTGCTCCCACAGTGAGTCGTC  
TCGAGTGATGGCGCACCATTTGTCTACATACACATGCAGCAACTCCTAAGGAACGACCGTCGAGCCTCTTCAA  
TATATCTATCAG

>TCONS\_00028471

ATTCAAATCAATTTTGGCGCTTAATACCAACATACATGAGGAGCGAATAGTCTATATGAAGCATACGGTATAT  
 AGAACTTAACATCTCTTTTACAAATTCAAGAAGTGTCAAATGATGCTTACAGGAAATTTCCACCAGTTTCATT  
 CCTATTTACCGAAAGTGAAACAGGGAAGTGTACGAGCAAGTCTGATTCACCAAGCACTCATTAATCTGCA  
 GCATCAATCAAGTTTAGCAACTTCAAGTTCGATGTGGTAAGTCCGGACATTTCATTCTCCTAAAACAATAAACT  
 TGCCCAAGCAGCAATAAATGCAAAGCCACCGAAGGGAGCTAAGGTTGAGTATTTCTGTCTTCCAGAAGTGC  
 AACTGCATAGCACGTTCCAGAGAAAGCGATAATTCCACCAGTTAGCAATCCTCCAAAAATGTTTGGATGTTT  
 AGTGATAGGAGCAGAAACAAGGGCAGCAGTGTGAACCAAATGGTACAGTGATGCAGTATGCCACACCTCTT  
 TGTAAGTGGGATTTTGGGCTTGAAGACATGAGCTCCATAAGTTCCTAACCCAAGAGCAGCTACACCAGAAA  
 TAGCAGCCACTTTGTGCCAGATTTGAGGATTCATTTTGGTTTTTCT

>TCONS\_00028485

CAGATTTTCCTTGTTGATATAGGAGACAACCTTTTCTATCTCTAATTTGGCTCAAGAATCTTACCAAAGCAGCAA  
 TTGAAGCAAAGATTGCAACAGTCAAATAGCGGCCAAGTTTAGCATCTGCAAGGAAACCACTAGAAAGACCA  
 AGAAGATTAAGTGTGCCCATGAAGTTGGTGACAATGTTGGCAGATTTGGAGGCTGGAAGATGCAAGTCTCCA  
 ACCAAGTTTGTGTACTTGGAAGCATCATTTTGTGGTTGAAATAGCTTACAACCTACTGAGCCGTTAGATTGG  
 GAATTGACATATGTTTGAATGAACGTGCTTCTTATCTACACAGAATGGGACCAGCTGTTTCAGCCTTCA

>TCONS\_00028527

CTGACACAAAAAGAAAATGTAAAAAGATAGTAAAAACAGCAAAATATCAAAATTGTCAACTAATAAGTACAC  
 CAGATCATGAACTTGAGATATCTGTTGGCACCCTTAAATATAATGGATAAAAAATGAAAGAATGAGAGGAA  
 CAAAAGAAATCGAAAAGGCACCATAGCGCAAACCTCAGAAAATATAAAATCAAGAAAAATGGACAAATCCA  
 ATAAATCTAAAAGTAAAAATGAGAAATATATCCACTGGAAAACATAAGACATAAAATCTGCCAAGTCCTGT  
 AGGAACTTGGCTTAACAGTAAGAAGTATGGATTATATGGAAGTAATGAAATAAGAAGCAAATGGCTACAAA  
 TCCAATAACAAAAAACCAAGCCACTGACCATAACAACTCATCAACACTTCAATAACTTTGTTTCCTCGTGGT  
 CAGGCCACTGTTTCATCACAAGTGCGATGAGTAGCCACTACTCCCCGGTAGCTTAGCAGGTGAAGGTTGGCCA  
 ACCTGCTTATTTGGGTAGGCCTGCATTAACCCGGGCGCCACTCCCCCGTAGAACCACCAATGCTGCTACCAC  
 CAACACCACCACCATATACCCCTAAACCTGAAACACCCCCTCCTAAACTACCCAACATCCCACCATAAACTC  
 CTACAAACGGATTACAAATCCTACATAAGGATTACAAACCATTCCACCATACAATTGATTCATCATCGCTAG  
 ATTCGGGTCCTGACCCATCATCCCCATATTCTGAGCAGCTGCAACTGATGGCGGCATTGCCAGCAGCGGGTGG  
 TGTATAACCTCGGTCGTAATACTGGCCTCTCCTCCACCAATTTTGGCTCGGCAGCCTTCTTGCAGTACAACCT  
 CCGCCCCCTCAAAACCTTACACGGCTCTTCTAAACATCTTTTGCCTCCTCAACCGTTTATACACAAACAAAG  
 CATACCTTTTGTATTTCCAGTTGTTGGATCGAACCCCATTTGGTCCAACCTCAATTTCCCCGAACTTTCAAAA  
 AACAACTTAATCTCTCCGACTCACGTACGCGGCACATTACTCACGTAAATCTTCCTATTACCAAAGTCCA  
 TGGTCCCCTAACGGCAGTGTCTTCACGGCAGCCAACCTTAC

>TCONS\_00028672

GCCAAGAGCACCCCCGCGAGTAAAAGCGTCCACGGCCGGCTGACCAAAATGAGGATCCCAAATTGCATTAG  
 CAATAGGTCTTACATGTAAAGGTTCTGTACCCACGACTCAAAATTTCTTGCCAAGCTACATGAAACAGATT  
 TCCGGAAGTCCACAGAAAAATTATTGCTAATTGACCGAAGTGAGAAGCAAAAATATTCTGATAAAGACGTTT  
 CTCAGTAATATCATCATGACTCTCGAAGTCATGTGCGGTAGCAATACCAAACCAAATACGACGAGTAGTGGG  
 GTCCTGAGCTAAGCCTTGGCTAAACCTTGGAAATCGTAATGCCATAATGCTTTTCAAATCCTCCTATCCATTAT  
 CCTACTGCAATAATTCTTGCTAAGAAGAATGCCCATGTTGTGGCAATTCCACCCAGAAGGTAATGGGTTACTC  
 CTACAGCACGTCCTTGATAATGCTCAAGGCTCTCGGCTGAGTAGCAGGAGCAACTTTTAATTTATTATGAGC  
 CCAAATGATGGATTCAATAAGTTCTTGCCAATAACCACGTCCACTGAATAGAAACATTAACTAAAATTCCA  
 GACAAAATGAGCATCTAGGAAAAAAAGGCCATATGCAGATAATGAAGAACCATAAGACTGAATTACCTGGG

ATGCCTGTGCCCATAAGAAATCGCGGAGCCACCCATTAATATAATAGAACTTTGCGCAAAGTTTCCTCCCATG  
ATAT

>TCONS\_00028674

GCCAAGAGCACCCCCGCGAGTAAAAGCGTCCACGGCCGGCTGACCAAAATGAGGATCCCAAATTGCATTAG  
CAATAGGTCTTACATGTAAAGGTTCTGTACCCACGACTCAAAATTTCTTGCCAAGCTACATGAAACAGATT  
TCCGGAAGTCCACAGAAAAATTATTGCTAATTGACCGAAGTGAGAAGCAAAAATATTCTGATAAAGACGTTT  
CTCAGTAATATCATCATGACTCTCGAAGTCATGTGCGGTAGCAATACCAAACCAAATACGACGAGTAGTGGG  
GTCCTGAGCTAAGCCTTGGCTAAACCTTGGAATCGTAATGCCATAATGCTTTTCAAATCCTCCTAGCCATTAT  
CCTACTTGCAATAATTCTTACTATGAAGAATGCCCCGTGTTGTGGCAATTCCACCCAGAAGGTAATGGGTACT  
CCTATAGCACGTCCTTGTATAATGCTCAAGGCTCTCGGCTGAGTAGCAGGAGCACTTTTAATTTATTATGAGC  
CCAAACGATGGATTCAATAAGTTCTTGCCAATAACCACGTCCACTGAATAGAAA

>TCONS\_00028813

AAAAGCAGAAAAGTTTTGACATCAGTCTAGAAATAACAGTTAAAATGGAAGCACAAAGCTCACATTCCGG  
TAAAAGCCTTTTTTCTCCACCAGCAGAACCAGCTGGAATCACCTTTAAGACATTGAACCTCACAGTTTTGGA  
CAAAGGCCTGCACTGTCCAATGATAACATGATCTCCCTCTTTCACACGGAAGCATGGTGATATGTGCGCTGGA  
ATGTTGAGTGCCTCTTCTCATATCTCTGGTACTTCTTCACATAATGTAAGTAGTTGCGTCGAACAATGATGGT  
TCTGTTTCATCTTAGCACTGTGGCATGTACCAGCAAGGATACGACCTCGGATAGAAACATCGCCAGTGAATGG  
GCATTTCTTGTCAATGTATGTACCTTCAACAGCCTCACGAGGAGTCTTGAACCCTAGACCGATACTCTTAAAG  
TAGCGATTGCCTCCCTTTCTGGCCTTTTCCCTTTCCCTGTCTTCTTCGAGCTTAGAAAAACACCTGGCTGCTTC  
AAAAACGCCTTCTCCGTCTGCTCCGCCATGATTGAGGACTACAAGCTGAACTGGACGAGGATAGATGCTCAG  
CGGCAAAACCCTAAAGTGCAACAGAGAGTG

>TCONS\_00028873

AACAGTTTCTAAAGCATGATTGAGAAGAAAAACCCAGGAACGAAAAGGAAGTAAGTAACCTAATGACAA  
GGTACTAGCATTATCACAAATCCATATTCAACTTCTGTCAATTGGCATCTATACTTGATCCTGCATCCGCCAGTG  
CTTCAGCCATCATCTTTTCTCTATTCTGCATTTGTCTTTCCACAGCAACCATATAGAAGCCAATTGCACTCCCA  
ATTGCACAGACCCATAAAAGCCTTCTGACCATTGTGCACCAACGATTCCCTCTATTCCCAAAGCCCATCAGCT  
AAAAGTGGAGCAAGGGAACACGTATTAGAATGTGAATTTCTCGTCATGAACTACAGTAGAAAGGGAGGAA  
GGAAAACAAATTTAAACAGTAAGA

>TCONS\_00028886

ATGGTCCTTGCCATATCCTCAAGGGTCCTGTTTTTCTCTCAACTACCCCATTTTGCTGAGGAGTCCTAGGGGC  
AGAGAAATTATGATCTATTCCATTTTCATCACAAAATTCAGCAAACCTTTGCATTTTCAAATTCAGTTCCATGAT  
CAGACCTAATGGATGCAAGTTGATTTCTTAATTGTTTCTGGGTTTTTCTAACAAAAGCAGTGAACATTTCAAAT  
GCTTCATCTTTAGAGGTTAGAAACAGAACCCAGGTAAATCTAGA

>TCONS\_00028891

AGTGAACAAACAATTTCAACAAGTAAGGAATAATCAAAAGCTTGCCCTCGGGCTCAATATCAAACCTCAC  
AGTACAGTATCAGCCCCACGGGCTCACTCCCAACTCACCAGCACACAACATCAGCCCCCTCGGGCTCACTCCC  
AACTCACAAACACAAACAACGGCCTCTCGGGCCCACTCCCAACTCACCTGGGTACCTGCGCTCACTGGGG  
GTGTGTACAGACTCCGGAGGGGCTCCTACAGCCCAAGCGCAATATCAATAGGCCCGAAAGCCTTCACACATC  
ACACTCGAGGCCTGAAAGCCTCCTCACATAACACTCGAGGCCTGAAAGCCTCCTCACATCACTCAACATATC  
CTCACAGATGGCCCTCGGCCTCAATCAGTCCAGAAAATAAT

>TCONS\_00028987

CCTGGCAAGAATCTGCAATCCCTTCTCGCTCATATGACCCATTCTTTTGTGCCACAAATCTGCAGAAATCTCAT  
CTTGTGCCGCATTCAATTCACCTTGGCATATTTCTGCATTGTCTGTACAACGTGCCACGAGCAACTCCCTTT  
GCAATCACCAATGATCCCTTGGTGAGTCTCCACTTTTGATTTGCAAAATAGTTCTCGTATCCATCTCGGTCTAA  
AGCAATTCCCAAGATCAAGTTCATCCGCAAATCAGGTGCATGTGCGACGTCCTTTAGAACCAATGTGCATCCG  
ACATTTGTCTTGATACAAATGTCACCAATCCCCGCAATCTTTGAGTAACTTGTGTTACCCATTCTCACAGTTCC  
AAAATCACCTGCTACATATCTACAAAAAAGATCTCTTACCGGTGTGGCATGGTAAGATGCCGCTGTGTCAAC  
CACCCATTCCGACTCTGGACCTGACAGGTGCATGCATTCCTCTTCTCATTTATAAAGAGGACAACATTATCA  
TTGTTTTGCACCATGGTGGTTGTGTTGTC

>TCONS\_00029017

CCCGCAAGTGGATACCATGATTCTTCTGTCTATCAATAACCGCATGCATTGCACGGTGGATGTGAAGAAGTAG  
ACCATTATCTCGGCAATAATGAGCCAAGCTAGTATTTGCGGTGAATCCCCCGTTAAGTAGTCATGCATTACG  
ATGGGAATGCCCAATTCTCTAGCAAATACAACCTCTTTTGATCATTCTTTCGCATGTACCTACAGTAGCATTCAA  
GTAATGCCCTTTGATTTACCTGTTTCAGCCTGTGCTTTATAAATTGCTTCGGTACAAAATAAGAAACGATCTC  
TCCAACGCATAAATGGTTGTGAGTTCACGTTCTCATCATCTTTGGTAAAATCAAGTCCACCGCGAAGACATTC  
ATAAACAGCTCTACCGTAGTTTTTAGCAGATAACCCCAATTTAGGTTTAATAGTACATCCCAACAGGGGACG  
ACCATACTTGTTCAATTTATCTCTTTCAACTTGGATCCCTTTGGTAAAATCAAGTCCACCGCGAAGACATTCAT  
AAA

>TCONS\_00029018

CCCGCAAGTGGATACCATGATTCTTCTGTCTATCAATAACCGCATGCATTGCACGGTGGATGTGAAGAAGTAG  
ACCATTATCTCGGCAATAATGAGCCAAGCTAGTATTTGCGGTGAATCCCCCGTTAAGTAGTCATGCATTACG  
ATGGGAATGCCCAATTCTCTAGCAAATACAACCTCTTTTGATCATTCTTTCGCATGTACCTACAGTAGCATTCAA  
GTAATGCCCTTTGATTTACCTGTTTCAGCCTGTGCTTTATAAATTGCTTCGGTACAAAATAAGAAACGATCTC  
TCCAACGCATAAATGGTTGTGAGTTCACGTTCTCATCATCTTTGGTAAAATCAAGTCCACCGCGAAGACATTC  
ATAAACAGCTCTACCGTAGTTTTTAGCAGATAACCCCAATTTAGGTTTAATAGTACATCCCAACAGGGGACG  
ACCATACTTGTTCAATTTATCTCTTTCAACTTGGATCCCATCATCTTTGGTAAAATCAAGTCCACCGCGAAGAC  
ATTCATAAA

>TCONS\_00029027

TGGA AAAAATGTATTACGGGATAATCAGAAATGACGCCACGTTCTTCAGATTACAATGAGCCTCATCACAAG  
CTCAACTTCTCGTAAAACCTTTTAGCACGGCTGTATGGTCTGCACTAATTATGCTAATAAAACATCAGGCTAAT  
AACAACTTTTCACTCTGGTCCTAAAAGCCAATTTGCTTGGAACAGGCAATTTCAAGAACTCTGGCTGAATTTCT  
CGGCCAGTCATCTTCTCAGATTCATGCAACATGTGGTTTATGAGCCCCCTCGCAGCATCATCCTTCAATTTCTG  
AATTCTATCCGGATCTGTCTCGTGCATATGCTTTTTGAACTGCTGTCTACCATAACCAACAAGAAGCTCTGTGT  
TATGTTGCTTGCTACCAATATATTTTGCTCGTCGGAGACACTCACGATAAAGTCGGATAGCATTGTTGGCTAGT  
TCAGGAGGCAATGCTGTTTGGAGAGACGGCATTGTGCAACTCGCTTCAAAGTGTAGCAACGGAAAAGCAGA  
GACAAAAGAACCTTAAATCAGAAACACTAGCCGAAACTTGTTTCAG

>TCONS\_00029096

AAGAAGAAGAAGAAGTAGTGATACCTGATGAAACCTTTCCCTCTAGTGCTCCCAAAAGATGTGTTGTCATTA  
TGGAAGGGGATCCCCACGCTGGGACTACAAGAGGTGCGATGTCTTTTCACTGTTTTAATCCTTCTATTGATAA  
ATTAAGAGAAGAAGCGTCAAAACCACATTTCTGAAGGTTCTGCTGCTTGTCTTCAGAGACGAGTGAAATAA  
ATTCGAAAAGGTCAGTGTTTGTATGCTTAAAGTTCTCATAGTAACTTGTGTACTCTATCCATTGTTGTTATACGA  
TGAGCATTATGGCCGATTACTTCTACTATATACCATCTTGACTTGATCTTTTCACATCTCTTTCATCAGTAGAAA

GATAAACATTATTTTCTCCTGGTATATCTTTGGCCGAATATGTTGAAAATTCCTTCTTAGTGATGTTTGTACG  
TAGAGATGATAATAGGCGATATATTGTATTTCTAAAAAGAAGATA

>TCONS\_00029128

AAATTTTCCACGCAGCTACAATGTTGCAAGAAAAGATTGCAAGTCTGCAGGTCATGACGGAACAATATGGTA  
ACGCCTTGTACGATAGCAAAACAGCAAGATAAATCAAGATAAATGCCAAAGGATCAAATTGCATCCTCGCT  
ACTTGAGCTGGTCAAATAGCTTCACCGCAACACATTTGTCAATACACTGCCAATAATCAAAATACTGTCCAGT  
GCAATGCTTGTGCCAGATTCATCACCTTCTATCCTTTTAGCACAAGCCTGATATTCCCTAAGTTGCCTTACAC  
ACTTCGGCTTGCAAGTCTCTTCTAGTGTCTTCTTTGGTCAACGACTTCCTCGTCCGACATGGCGAAAGAATAT  
CGATGCCGTAGGTTACCTGTTTCTTTCGGGGGATTTGAGAGTCGCGGAGTGGAATGGAGCTGCAAAAGGC  
AATTACTATGCAAGAGGAGAATCTCGAAGGTTTCGTTGGGCTTTGTGATGGATGTTGGTCAATTAGCTTGCGCC  
GAGTGCGTAGGGTACGCCGGGTTTAATGTAATTACTGGAATACCCC

>TCONS\_00029204

AGTGAACATTAATAAAACAAAATCATCACTCTTCCATAACTAATCAGACAAAAGAATCATCCATTCATTCATAT  
AATTTTTTGGCATGTTGAGTTCTCTCAATCTTGCTTTCGTTCTCGTGACTTTTTCTCCAATTTCTCATTTTTTGA  
AATAGCCTTGGCAATGGCCTTCATTTGACGTACATTCTTTGACCTTTTCATCTGTACTCCCTTCATCTTTCTATGT  
GATCCACCTATATGTGGTTTTGGAGCTGCTGACTCTGAAGTATCCATTTCTTGGGGACCCGTGACCGTCTTGTC  
AGAGGAGATATCCATAGCCGCACGACCATTTTTCTTATTCTTGTTTCTGTTCTTCGCCATAGCTATGCGAACAG  
GGAGA

>TCONS\_00029264

GATAGAGAATACTTGTCCTTGAGAATAAATGGAACCGAAGCGCATATTTAGTGTTTGAATTATCTTCGTTTAG  
TATTATAAAAAAATGTTTTGGGTTTCTAACCGTGCCACACTAGATTGGAATGGTAGGACAAAAACGTTGAAT  
GGAAAAAGAAACAAAAAGCAAGCAAGCAAACCCACGCACGCAATCCAGGATAGGGCAAAAATGAAAATA  
AAAAAGAAACAGGTCAAACATTGATCTCTACGTTAGCACATTTCATCATCTTGAAACAAATCTATGGAGGTTT  
ATACCAGCTGCAGCAACCTTAGTTTCCAACCTCCAACCACAGATCTGAATCATTAACCTACCCTTGACGTGACAT  
TATCCTTTTCTCAAAACCATATCCAGTTTTTTTTGGTAAGAAGTTCATTCTGAACACTGGAAAACCAACGGAT  
GTCACATTAAATTATACAATTTCAAGGGCAGGGAAGCAATTATGGGAGGCAATCGGAAGAGTCCAGGCATTA  
ACAGCCAGCCGAAGTGCCATATTGATAAGCAAGTCAATAGAATACAGTCCATAATTTTTGTTATTTTTGAATA  
TTTTGTTGCTATGCCTTCATGCACCACTTGCAATATAGGCGTGTCCACTCCTTAGCCGTTTCAACAGCTTCAGCCT  
CATTTGACTTCCAGTGCTTTGCAATGTTTTAGAGAGTGGATCATCTGGATTTGGAGCACTTAAAAGTGCTTGA  
ATGCTCAAAAGTACAGTACGGATCTGAAGTGCAGGACTCCACTTGTCTTAAAGAATATCAAGACATATCCTTC  
CAAGCTTATCAATGTTAGGATGGTAGATTTTGGTGAGGAATCGAACCTTAGGAGCAGCCATCGGGTACTCTTC  
AGGCAAAAAGAGTTCGAGCTTGAAGACACCTCCTTCATAAGGAGACTGTGTAGGACCAAGAATCATGACATT  
AAAGTATCGCATATTATCTTCCGATGGAGATGCACTTATTCCTGGTGCAGGTTTCGCTGAGAAGCCGTTGAGTT  
TCCTTGATAATTCGGCGAGGAAGATTGCTGTTTCGCCATTGGAATTGAACTGAAGGCTGCCTGGGTGGGTGGGG  
TTCTTCGGTGGCAGAG

>TCONS\_00029432

AATTTGATCTACAAGGTCATCTAATTCCTCACCCCAATCAGATGTTGTCCCAACAAGATCTTCAACTTCTACGT  
CAAGCTCAGGTTGATCAATAACCAGTACTTCCTCTGCTCCATCCCCGGATATAAGATCTTCACCGAGCAACTC  
TTCCCAAATATTCTCAGGCACTAGATCCATATCGGTTGCACTTGCTGTCACAACAGAAGCCGACCTTGCGTTG  
CTGCTTGATTTATTGTCCAATGCAGCAGAGAACAGCATTGCCATATCGCTTCCCATATTTGTAAGCTCCGTTTC  
ACGATCTCGAGTGGAGTAATTCATAGGCTGATCACTTCCGTTGGCAACTGATACAAAATCTTGAAGGTTCTCA  
CTACTGGGGGTCATAGTTAGTCTCCTCTTTTGCCCAACTTCAATGCGTTGTTTATCTTTTCTTTGCACACATTTAT

CCAAGTATTGCTGGAGAAAAGTCGGATTGCTGAAAATCTTGGCTAGGAACTCATCATCTGCTCTTGTTCCT  
CTCTGTGCTTTTCGATTTTTTCTCCCATTGCAATGATCTGATTTCTAGTACTCTGCTGTTGCTGTCTAAGCTTAACT  
ATTTCAAGTCCACAAAAGATTCTTATCCCGCTTTAGTCTTTTCGAGCTCCTCCTCCATTCCATAATACCCTATTTCA  
ATACACGGCCCCGGATCCTTGTTGGTTCATGCTCTGACCTACATTCTCCTCCTCTTTATGGTCTTCAAAAGATG  
CTTCTGTCCGCCTAGAAAACCTTCATTGCAAAATTCCTCATCTATCCGGATCCACTTTTCTAAAACCCTAACGTG  
CTTCTTTTCTTCGAGTATTCATTGTACAACCATCAAACACAAGCAGTAGAATTCATCAGAGCCACCAAACATC  
AGCCGCAGAGACTATCTGAACTTCTGTCTAAAGATATGTGTTAAGCTGGCGAATGAACTGGAGAAATTACT  
GTGCTTGAAATGCTTAGGCAGCAAAGTGGTTGAAAACCTTATGAGAATCCCAAACAATAAAGCTATTTCTTGCT  
CTGCTCCATGAAATTACTGCATCCGTTGAAGGGTCTTCCACCATTTCATACGTCTTGCTCAAAAACGGTGGTG  
GACCCACGTCATGCAGCCCCTCATTGGTAGCGGCGCCGCGTCACGGCGGTGGCAACGTCCTCTTCCTCCCG  
CTTCACTCTCACTCC

>TCONS\_00029434

CGATTGCATGATTGGCACTAACTTAGCAAGGTAAGATGGCTGGTAGACTGATAGAATAGTGTTTCTCATTGTT  
GACCATCTGGAGTCCCTAGTAAAAAATAGGCCTTTCTGATGAAGAGGGGATGCTGCAATTGGAGATGGGATG  
CTTCTATTTGGTATGTCTTGAATTTCTTTATTCCAACCTTCTCTGCATAGTTCTGCATCTGCTACAATAACTAGT  
GGCTGTCTACCCATATGAAATCTGAAGATAGGACCATATTGTTTGGCAAGGACAGAGAAGACATCAGGGCCA  
TATTTAGCCATCAAAGGAAGGTGTCCTACAAGGGGAAAAGCTGGAGGACCTGGTACTTTTCTCACAAGCCAA  
TAAGGTCTATAGAAGTAGACCAAAACACCAGCTACGAAGGCTAAGATAGTGCATATTGTTGAGACCAAAGA  
TGGT

>TCONS\_00029435

CTCGCGGCCCTATTCCAAATGGAATATTTGCATAAGGATGCCTTTGTTTTTCTCTTCACAGCTTGGATCAAAC  
CTCTCTGGTCTAAACTTCTCTGGTTCGGGGAAGTTCTTTGAATCCTTAGCAAGAACTCCAAGAGCCAACCAAA  
CCCATGTGCCCTTAGGAAGTTTATAGCCTCCGATCTCCACCTCAGCTGATGTTTCTCTGGCAACTAAGGGTGA  
GACGACATAACACCTCATTGCTTCTTTGATTACCTGATCAAGGTATGGGAATTTCTGCTGAAGATCAATGGCA  
GTGGGTATGTGATCATCAGGGCCAAAAGCATCTATCTCCGTGAGCAACTTCTGCTCAACCTCTGGATGGCCAG  
CAACCAAATAGATAATAGAAGACAATGTAAAGGAAGTTGTTGCAGAACCAGCCAGTAAGTGCTCATAAGTT  
ACAGCACTGATATAATCTGAGGTGAAAACATTCTTAGCTAACTTCTCTGACTCCCTTGCTGCAGTATAAGCG  
ATAAGAAGTCCTTTGAACCGCGATCTTTTTCTCCATCCTCTTTGCTACTATCTCATCTAGCCTCCTGCTTAAAT  
TCTTG

>TCONS\_00029439

GGCGGAATTCACTACTCAGGTCACACCACTGCTGGAAGTATGCAGCTCTTGAAAGAAGGATTTGCCAGCCTC  
ATATGTGACAGCAAATGGCAGCAGCAGGAGCATGGAAGAGCATCCTTGGCATCCAGCCTCTCATGAGACT  
TCTGTATCCATCTTTCTTCACTATTACTCGAAAAACATCCCTAATTGACCCACTTGTAATCTGTCACACCCAC  
AAACGCCCTGACACTGCAATTGTGTCTTCACAACATCAAGAGGCGTCGTAACCAATGCCGCGGAAGCACCAG  
CTGCTGCCCCAGCAGTAGCATGAACTATTAATCGTTCATCGCTCGATTCTCGGGCGATACCTCCGTAAACC  
CTTCTTGATAGCCTCATACGTAGCAAAGTGCACAGCTGTATATGGAGCATTATTAGAAC

>TCONS\_00029457

TCTTTGTCTAGTAATCAAACCTGAAAAGACATGTTACTGCATTTGTCATAGCTTTATGTGGCATCTTGCTCCCCA  
TCTCGAGATTCAGCCAGTAGCTACATAATATGGGGTCACTCTACTGTGGTTGGACCGATGGGTGAAATAATTG  
CAACCACAGGGCATGAGGAAGACGTTATAATTGCTGATATTGATTATGCTGCAATTCAACGGGCAAGGG

>TCONS\_00029474

CTCCATCCTTCGGAAGTGGAAGAAAGGGTACTCTAATTGAATACATAGTAGGGACCCGGAACGCTAAAAGGT  
GGGGGAAGTACAGTTGTACGGTAGAAAAGATAGATAAAATAAATGACTATAAGAAACCAACGACTCTCTCT  
TCTTAAACAACCTATATCCTCCACACTTAATCAGCATTGATAGATTATCCAACCCCGAGCAATCTTAGTTATT  
GGTGGAGGTTTCGGTTCGTTAGCTAGTATTTGTTTAGTCATTTCAGATAGTCACTGGCGTTTTTTTAGCTATGCATT  
ACACCTCATGTGGATCTAGCTTTCAACAGCGTAGAACACATTATGAGAGATGTTGAAGGGGGCTGGTTGCTCT  
GTTATATGCATGCTAATGGGGCAAGTATGTTTTTCATTGTGGTTCACCTTCATAATCTTCATGGTCTATATCATG  
CCAGTTATAGCAGTCCTAGGGAATTTGTTTCGCTGTCACAATCATTAAATAGGAAGATTACAACCTCCGAGACACC  
GAACAAATTCCCTAGGACTGCTATAACTGGCATGATATAGACCA

>TCONS\_00029555

AGGGATTGAAAGAGTCAAAATTCGCCCCGCAAAACTTTTTTTATTGCAAAATTTAGGACAATACAACAAAGG  
ACAAAATAAGGATTTGGTATAATAATAACAATTTTTTTTTTTAGATTTCTATTTATAAACTAAAAAGTTTAGTT  
ATCTATTCAAACAAGATATACAAATTACTAATAGATTGAATGAAATCTCAAAGAATCCACGTTCAAGGTAT  
TACTCAGTAAATACATATATATCTTAACCTTAAGATTGACTATTCTAG

>TCONS\_00029562

ACTTTGGGAGTTCCAACCTATCCTGACTTAATTCTGTCTCAGTCACCGTGTGATCGGCACGAGTTTCGATCCCAAC  
CTGATCGAATAGGCCCAATCCACGAGGTGCCACTCGCTTCATGGTTCTCAGCGCTCATGTCTCATACCTTAGC  
ATGGCTAAGTAAATTCTCAGCAACGAGACCCTCGGCTCGTGTGCTCCCTACTTTGGCACAAGTAGTTTCAGGA  
AGTCAACGCCTTGCTCAGGACCCTAGGCCTGGACGATGACCCCT

>TCONS\_00029643

AATATATTTTAGAGAGATCCTGTTAGTGGAACAAAGCAGCACCAGATCGAGTTTGGGAGCTCCAACATACT  
CGTAAGGATGACAAAGGAGAACTGTGTGGTCAGATCCACAGTCGCAACAAATACATGGCCAACTCAATGA  
AATTGTAACCTCAACAACAATCTGAAGAAAATGAGCAGCCAATGAGTGCAGATGAGATTTTAGCCACTGTACT  
TGGCGAACGAACCTGGCTATGTTTCGTGAAAAAGGGTATGGAAAGAAGCCTACCAAAAAAAAA

>TCONS\_00029687

TGTTGCCTCACGCGCCTCCGTGATGTCATTTCGACTGGTTGTAGAAACCATACTCATGAGACCGAGCGAGGAA  
GCCGTGAAGTGCAGATATATCATGGTGGGAATGAACAGTTGGAGTAGTGGTACCGTCTTGAGAAGAAGAAG  
GAGCAGTGAAGGCAGAGGTAGCAAGTGGTATGCCGACAACTGCTGCTGAGAAGAAGGCGGCGCGTGAGGT  
ATGTTTAGTGAATTTCCAGGAGGATTGGAGTTGAAGAAAACGAGATTGCTTCCTCCTGCAGGTGGCTGATGAT  
GTTGTGTCTCAGAGAATCCAACATAACCAGCAGGGTTCATCAGTATAAGACCATCAGCAGAAAACCATCTTC  
TTCTGTGAATTGATGAGAACTATAAAAGTACTCAACTTTTTTCAGAGAGAGAGA

>TCONS\_00029792

ACTCGCTTTCGCTACGGCTCCGGTGGGTTCCTTAACCAAGCCACTGCCTATGAGTCGCCGGGCTCATTCTTCAA  
CAGGCACGCGGTCAGAGCCCTGGCTCCTCCCACTGCTTGGGAGCTTACGGTTTCATGTTCTATTTCACTCCCCG  
ATGGGGGTTCTTTTGCCCTTCCCTCACGGTATATGGCTTCAACCTAAATGGTTTCAATTTCAACCA

>TCONS\_00029800

TCTAATCGCTATCGCTGTCGCTGCTGCTGCTGTCATGCCCATCGTGCTTCTTCTCCTTTTTGTCCTTCTTGCTCTT  
TTTCTTCTTCTTCTTCTCCATGGATCTTTTCTTTATCTTCTCAACAATCCCTTCCTTGCTCTCCGCTGCTATGG  
CCGTGCTCCTTTTTGTGCTTTTCTTCTTCTTGTGTTTATCGGCCTCATGGTGTGTTGCTTTCTCTCCTTCTTG  
GCCTCCAATGTGGAGTGTCTCCCTATCTTGT

>TCONS\_00029878

TCTCTGTCAAATTTTCTTGTGACTTAGATGGAGCTTTAACGTTGGGCATACTAAGAACGGCACCATGCCCTCC  
ATCTCCAGCACGAACCTGTGATAACCACCTCATCAAAGTATTTGTGGGGTTCCTTATGAATGCATCAGAAGCG



GGCGAAGGAGGCGTTCTGGCTTTTGCAAGTGCACACTTTACAGTATAGCTTCTATAATTTTCGTTATTGTTCCA  
TTTTTTAGAAGCACTTTTTGGGAATTGTGGCAAGGGAGGGGAGAAGGTAGCAGAAAAGGAGAGCGA

>TCONS\_00029941

ACATAGTAGAATCATCCTAGTAACTATAAGTTTCTTGTGTGTATCCATTTTTACCTGAACATTTTATGGCGAAA  
TATGAAGCACATGCATATTGGAGGACATAATCAATCCGTCTCCAGATTCTCATTCCCTACTTTCAGTTCAATCA  
AGGACGAGGGTAAAGCTAGGTAGCTTGGGGGAAAAAACCTGCATGGTTGCAAGCATGTTTTCTCTGTCATCC  
TGAAATTCAATTCAATTAAAGTTATAACGGACGAATGTACTAAGCCCTAATTCAGAAGACAAGTTGGATAAG  
TTTTAAGCTCCAAGTGGCTGCATTTGCCTAAAGGGGAAAGTCAGTCTTCCACGAGTCCTTGCATCATGCTGAC  
CAGATTGTGCTTTACTTCAGTTGTTTCAGGCC

>TCONS\_00029980

AAAATGAAAAATAGAAGGCACTTCCATTCAAGTGTATCTAAAACTCAAATCCAAGATTTTAAATTCTCGTA  
AAATTCTAAACAGGTAAGTATGTTAGATGATTCCAATTTTGTTGGCAACGTCCAATGCATCATAGTCAGGAGT  
CAACCTCACGTATGCTTTCTTAGTCCCATCAGGCCTAATCAAGGTATTGACTTTCTTTGTCTGGATATCATACA  
TCTTCTTCACGGCATCCTTAATCTTCTTTTTATCAGCCTTGATGTCCACGATGAAAACAAGAGTGTTGTTGTCCT  
CAATCTTCTTCATCGCAGACTCAGTGGTGAGGGGATACTTTAGAATCCCGTACTGATCAAGTTTGTTCCTTCCA  
GGTGCAGTATACGAGGGTACTTGGGGTTTCTATCTTCTTCAAAGTCTTGGGTCGGTGGAATGTAACTTTTGT  
CCTTATCTTTTGTGACTTCTTCTTGAAGTTGATCCTGACTTGACGGCCTTGGCAACCTTAGCTGCCTGTGCCTT  
GGGGTCAGATTTTTTGGACGGATCAGCTTTAGCTGGAGCCATTTGGTTACGTACAGTCTGAAACCCTACGAGA  
AATCAACCAGCTGAGAGAAGCTGCTCTGCC

>TCONS\_00029999

GGCCTGGCACTTGCCCCGACGGCCGGGTGTAGGTGCGACGCTTAAGCGCCATCCATTTTAGGGGCTAGTTGAT  
TCAGCAGGTGAGTTGTTACACACTCCTTAGCGGATTTGACTTCCATGACCACCGTCCTGCTGTCTTAATCGAC  
CAACACCCCTTTGTGGGATCTAGGTTAGCGCACAGTTTGGCACCGTAACCCGACTTCCGGTTTATCCCGCATCG  
CCAGTTCTGCTTACCAAAAATGGCCCACTTGGAGCTCTTGATTCCGTGGCGCGGCTCAACAAAGCAGCCGCG  
CCGTCCTACCTATTTAAAGTTTGAGAATAGGTGAGGGCGTTGCGCCCCCGATGCCTCTAATCATTGGCTTTAC  
CCGATAGAACTCGCACGCGAGCTCCAGCTATCCTGAGGGAACTTCCGAGGGAACCAGCTACTAGACGGTTC  
GATTAGTCTTTGCTCCTATACCAAGTCAGACGAACGATTTGCACGTCAGTATCGCTGCGGGCCTCCACCAG  
AGTTTCCTCTGGCTTCGCCCCGCTCAGGCATAGTTCACCATCTTTTGGGTCCCGACAGGTATGCTCACACTCGA  
ACCCTTCCCAGAAGATCAAGGTGCGTCGGCGGGTGCAC

>TCONS\_00030000

GGCCTGGCACTTGCCCCGACGGCCGGGTGTAGGTGCGACGCTTAAGCGCCATCCATTTTAGGGGCTAGTTGAT  
TCAGCAGGTGAGTTGTTACACACTCCTTAGCGGATTTGACTTCCATGACCACCGTCCTGCTGTCTTAATCGAC  
CAACACCCCTTTGTGGGATCTAGGTTAGCGCGCAGTTTGGCACCGTAACCCGGCTTCCGGTTCATCCCGCATCG  
CCAGTTCTGCTTACCAAAAATGGCCCACTTGGAGCTCT

>TCONS\_00030001

CGTGCCCTCCTACTCATCGGGGCCTGGCACTTGCCCCGACGGCCGGGTGTAGGTGCGCGGCTTAAGCGCCATC  
CATTTTCGGGGCTAGTTGATTCGGCAGGTGAGTTGTTACACACTCCTTAGCGGATTTGACTTCCATGACCACC  
GTCCTGCTGTCTTAATCGACCAACACCCTTTGTGGGATCTAGGTTAGCGCGCAGTTTGGCACCGTAACCCGGC  
TTCCGGTTCATCCCGCATCGCCAGTTCTGCTTACCAAAAATGGCCCACTTGGAGCTCT

>TCONS\_00030042

AAAAGAGCCTAGTATTTGGAACCTTCTATAGCACTACTAAAACTCTGTTGAGCCTAAAATGCAGATCCACTG  
TTCTTCGTATTTCCAAGCAAGGTGTCTTTGGCTTCATTAATTTTAGAAGCAAGGTAGTGACTACCTCCTGCATC

TGGATGGTTAGCTACCATCACCTTCCTATGCGCTTCCCTCACTTTATCTGCTTGAACGCTTTCCTGACTCCAAG  
AATAAGAGCTGCTTCCCTCCTGTTCAATTTAGGCTGAAAACCTCCTTCATAAACTTACGCATTCTTGCAGTCG  
GAGGTCTGGCCTTGAATGCTTTCATGCCTGGATTCCGTACCTTCCAGCATATGCAGCAGCGGCTATAGCCAG  
TCCTGCTACCAATGGTGC

>TCONS\_00030199

CCAACTCCCATCCCTTGTCTACTCGTCATGAATGTGATGTTCCCTCATTAGCAACATAGTGGACTTAGATACT  
CAATTCAACTTTGCCACAACCGTACTGCAACTCTAGATCCCTTCACGGCTTCAGCTCCATTGCCAACCTTCAA  
GTCATAATACTTTAGACCATTAGGAAGGGTTGTGTATTCACTCTCTGGTATTTTTGCTCCCCTAAGAGCTCTTCT  
GCTTGTGCTAGCAGCTTCAGCCACATCACAAAGACAAAAGGCAGCAG

>TCONS\_00030200

TGTTCCACCACCAACTCCCATCCCTTGTCTACTCGTCATGAATGTGATGTTCCCTCATTAGCAACATAGTGA  
CTGCAACTCTAGATCCCTTCACGGCTTCAGCTCCATTGCCAACCTTCAAGTCATAATACTTTAGACCATTAGG  
AAGGGTTGTGTATTCACTCTCTGGTATTTTTGCTCCCCTAAGAGCTCTTCTGCTTGTGCTAGCAGCTTCAGCCAC  
ATCACAAAGACAAAAGGCAGCAG

>TCONS\_00030201

TATCCTTCAACAACTTTTACAGCAGTTCCAAATGGGCTTTGTTTAATAGAAAGCAGTTCAATATCAATCTCAAT  
TGTTGCATTTGGAGGAATTTCTGCACCCCCCTTTTCCCATAGCTAGTTCTGGAGGAACTATGAGCAGGCGCT  
GTCCTCCTACTCGCATCCCTTGAACACCGAGATCCAATCCTTTAAGTACTGTTCCCTCTCTGATTGACCAACA  
TCAAATCCATA

>TCONS\_00030296

CACCACCGCAGTCCGCCGTGTGAGTTTGAAACCCGGCCGGCAGGTAGCACGGAGCACAGCTGGTGCAAGG  
CGGTTCCCGGTGGCACAGGGATAACAGTCTTAGCTCTCCTCTTATCAAAATCCCCTGACATTTCACTTCTCCAA  
AATGCCCTCCACAACTTCAAAATTCCAATCCTATCCTCAAATCCAACTCCACTACGAACCCACAATAAC  
TCCTACTCTTACATCATTCCCTCCACTTCTCACCTTCAAATCCAGCCGTTTGATATCTCATCAACGGCTCAAATT  
CTTCAACAGCT

>TCONS\_00030333

AAAAAGAAAGAAAAGAATTCCTAGCATATTAGGCAGATACCAAGTAATGTGTTTTATCTACAGTACTAAGT  
CTTACATGAACCATACTACAATCAGCTTCCACCTGTATATTTCTATATCAGTAAGCTAGAGGTGTTGTAACA  
CACGTAGGTTGTAATTCTATCAAGGGCAACTAATACCCTCACCGAAGTATACTGCGAAGGTCAAAAACAATC  
AAAAAGAGACTCATGAAATCACGGTGTGAGTTCAATTATGGAGGAGGCATCGAACTGAGAACTACTCCTTC  
ACTCAAGAGGGCGCATTGCAGCCCCCTCGTGAGAATTTCTTGCAAACAAAAAACAGGGGACCAGAGTAGAAT  
TATTCCGACACCACTCTGTTCTGTATTCAAGTTTCATAGTAAACATTGCTGATATCCTTTATTTTCTTGATTTGTAC  
AGGCCCAGCATCCGAATAGCTAAATGTAATAGGATGCCAACCCTTCTTCTCCATATTTGTGCGAGATTCATTC  
CACTCTGTATAGGTTATCGTTCTACGTTCAAGTTCTCCTTCAAACCATGCATCGCCAATAATGTCTGCACATA  
GTGTTCACTCTGGAATGCAGTTGTGCTGCTTTGAAGTTTCATATTCTTTTTCCCCTTACTGGCTTCCAGCGGTGG  
ACGTCTCTTGCAAGACATCTTGAAGACTCGAAGGACAGCATCATCATCTGCAACCACTTCCGCATGCTTCCTG  
ATTAAAGTGATCCACTGTGACCCCTTCCGCCATTTGCTCATTGGTATATAGGGTGACATCCTTGGGTGTAGCG  
GGCTTCCTTTTTATCAAGAAAACGTCAACAAAGCTCCTTGAGAAGCCATCAAGTAGTTGTATATGTAGCTA  
AAGTTGTACAGTGGAACACAGCTGTCCGACAGAAGAACAATCTTTGATTAGCTGGATCATCAAGCGCTGCC  
CCAAGTAATAGTTTCTCAGCTTGGATCATACTTGATTCTCCCCAGGCTTGATGCTATTAGTCAATTGGCGATTA  
TAGAAGAAAGGCGATCTTGTAGTAGACTCATAAACACAAAACCTGGCTCCGAATGTATATATATCGAGAAA  
TTACCAGTCTCTGCATTCTCGAAGAACTTCCCCAGAGGAAATCGAGAGGCAAATTACGACGGACTAGAAAG

AGGAAAGCAACTTTAGGATTGCCGCTATAATCAACAGCTCGAGATCTACGAGAAATAGAAGAAGTAGAAAT  
AGAAGAAGAAAGTTCCGAATCGGAAAGAGAGTAGCTCTGGAGCTTCAAAAAAGCTAACACGCAAAGAGTA  
AGAGACACTACAACCACTAGTTTCCACCACA

>TCONS\_00030334

AAAAAGAAAGAAAAGAATTCCTAGCATATTAGGCAGATACCAAGTAATGTGTTTTTATCTACAGTACTAAGT  
CTTACATGAACCATACTACAATCAGCTTCCACCTGTATATTTCCTATATCAGTAAGCTAGAGGTGTTGTAACA  
CACGTAGGTTGTAATTCTATCAAGGGCAACTAATACCCTCACCGAAGTATACTGCGAAGGTCAAAAACAATC  
AAAAAGAGACTCATGAAATCACGGTGTGAGTTCATTATGGAGGAGGCATCGAACTGAGAACTACTCCTTC  
ACTCAAGAGGGCGCATTGCAGCCCCTCGTGAGAATTTCTTGCAAACAAAAACAGGGGACCAGAGTAGAAT  
TATTCCGACACCACTCTGTTCTGTATTTCAGTTTCATAGTAAACATTGCTGATATCCTTTATTTTCTTGATTTGTAC  
AGGCCCAGCATCCGAATAGCTAAATGTAATAGGATGCCAACCCTTCTTCTCCATATTTGTGCGCAGATTCATTC  
CACTCTGTATAGGTTATCGTTCTACGTTCAAGTTCCTTCAAAACCATGCATCGCCAATAATGTCTGCACATA  
GTGTTTCATCTGGAATGCAGTTGTGCTGCTTTTGAAGTTTCATATTCTTTTTCCCTTACTGGCTTCCAGCGGTGG  
ACGTCTCTTGCAAGACATCTTGAAGACTCGAAGGACAGCATCATCATCTGCAACCACTTCCGCATGCTTCCTG  
ATTAAAGTGATCCACTGTGACCCTTTCGCCATTTGCTCATTGGTATATAGGGTGACATCCTTGGGTTGTAGCG  
GGCTTCTTTTTATCAAGAAAACCTGTCAACAAAGCTCCTTGGAGAAGCCATCAAGTAGTTGTATATGTAGCTA  
AAGTTGTACAGTGGAACACAGCTGTCCGACAGAAGAACAATCTTTGATTAGCTGGATCATCAAGCGCTGCC  
CCAAGTAATAGTTTCTCAGCTTGGATCATACTTGATTCTCCCCAGGCTACCTTGATGCTATTAGTCAATTGGCG  
ATTATAGAAGAAAGGCGATCTTGTAGTAGACTCATCAACACAAAACCTGGCTCCGAATGTATATATATCGA  
GAAATTACCAGTCTCTGCATTCTCGAAGAACTTCCCCAGAGGAAATCGAGAGGCAAATTACGACGGACTAG  
AAAGAGGAAAGCAACTTTAGGATTGCCGCTATAATCAACAGCTCGAGATCTACGAGAAATAGAAGAAGTAG  
AAATAGAAGAAGAAAGTTCCGAATCGGAAAGAGAGTAGCTCTGGAGCTTCAAAAAAGCTAACACGCAAAG  
AGTAAGAGACACTACAACCACTAGTTTCCACCACA

>TCONS\_00030359

CTCGAGGTAGCTTTCATCATAAGGTGGTTCCTATTTGGATGTGAGATAAGCTTGTTTTTGAATCCTCCCTTGA  
AATGGCTATCTAGTCTCCATAATCTTCGAGGTTATTGACACGTTACATTCATCTATCCATTGCTATATATGT  
CTATAGGCTCAGTCAAAGCTGTACAGTGGTACTAAAGCTTTCCTGGCAAATCCTGCATATGGCCTTACCAAT  
TAAGTTCTTCATATCAATGCGACATTCTACACTGCTTCCATGATTGCAAAAAGGACAACTGAAGACACTGTCA  
AGTTTGTCCATTCTCTTCTTGGTGCTGGCTTTGCTCTTGACTTCTCTTGCCCATTTTTCAACCAAATATCACCC  
GA

>TCONS\_00030392

GAAACTGATGAAGATGAAGAATATGAAAGTGAGAGTGATTTTGATGATGAATATGGTGATGATAATGAAGAT  
ACTGAGAATCAAGTTGTTCCCTTTGTCGTCTTCTCCGTCAATTTCTTCTTCTACCGGCAGTTATGGAGATTTA  
TCTGCCGGAGACGGCGGTGACACGGCGGCTGTTTCTTCTCCGTGGAAGAAGCGATTAAGGGAAAGTGATGGC  
CTCCATTGAGAGGATGAAGAGGCTTGCTCCTCGGATTTGAACTACAACAATTTATTGGAAGATAATAAGGGG  
ACATCTTCTTCAATTGGATTCTTGAGACCA

>TCONS\_00030426

GCAGCAAATTTTCAGGAAGTGTCTTGGAATCCTCAAGTTCGGAATTTATTAACCACCATTTACATTAAGATCA  
GGCAACAGTGGCTTCTCGATGCTGCCTATATCCTCAACCAACTCTACTTTTGGTTCCAAGTCTATGAATTGAT  
TAGACTTGCTAGCTAGGTGTGAGATACTGACCCTACCTTCACGTCTAATATAGTCAGCCACGGCTTTCATTTCT  
TCTAATGAGATATATATATATTTCCCTCTGTATCCATGACACCAGAGAGTCGCCCCATTTCTTCCAGAGAGTT  
GATCCGATTGATACACTCCTGAGTTCTTAGCTTGAATTCTGCAGCAAGATCCTCCAATGGCACACATTTATGTT

TCTTAATGTATTTCGACAAAATCAAAAAGCAGACCCTGGCTTCCATCTTGTATCTCATTTCAGTTGTTCTTCA  
GCATCAACTGAAATTTACCTTTCCATTTCTCAAACCTCTAAAGCAGCAGCTTCTTCCTCTTTGGCCTGTCGAGC  
CTTGGCTTCTTCTTCCAGTGCACGCTCTTTAGCTTCACGCTCCTCCTCCTTTCTCCTTCTGATTTTCGTCATAGCGA  
CTTTGCTTTGTTTGTTCGATTCCCGAGAAGCTTCTTCAGCCTGTCTTTGTGCTTCCCGCTCTTGACGTTTCTTTTC  
CTTTTTCTTTGATGATTTTGCAGTATAATATCCATCTCCAGCAGCTTCATCATCACTGTCATCACCCAGTTCATC  
TATAGTGGCTGCAGCCGAAGATGTGCTAGCAGCTGAAGAAGCTGGTCTTCGACGCATTTCGAC

>TCONS\_00030432

AGACACAGACACTACCAGCACCCTGACAGACACATCAGAAACCACCACGGAGACGGAGGACAAGGTGCA  
GAGTTGACTCCTTCTGAATATTATAATCAGCCAGAGTCTTCCATCTTCCAATTGCTTCCCAGCAAAAATCAG  
CCTCTGCTGATCCGGCGGGATACCCTCCTTGTCTGAATCTTAGCCTTCACATTGTCGATCGTATCAGAACTCT  
CCACTTCAAGGGTGATTGTTTTCCCGGTCAACGTCTTCACAAAATCTGCATCCCACCACGAAGTCGAAGGAC  
CAAGTGAAGGGTAGACTCCTTCTGGATGTTG

>TCONS\_00030529

AATTTTGCCACTATACAAGCATAAGCTACTGCATTACAAACAAGGAAAGAGAAATCAACAAGAAGACTCTTT  
TCTCTTCAACCAAGAAGCTTAGGATCATATCCATTACTAGAAGTGGCAAGAATATAATAAGCAACAATATG  
ACCAATAGAGCCCCAAGCAAGAACATCAACAATGTTGAAACCAACAGGGTCATTAGATTTTAGCAAATAA  
CATATTCTTTGGCTCTAGAATCACCAGCTTCAAAATGGCTCACTCCATTTTGCTCAGGCAACCCTTGTTTGGCC  
ACATTCTCTCTGAAAATTGAAGAAAACAAATCTTCCCAAGAATAGTGATAGTCCTGTGCTCAAGCTAATAA  
CAAGTGATGTGTTGAGCTCAGCTTTAACACCAAGATTGCATCTTTTCTTCATGGGTTTGTAGGAATTGGCCTTA  
TTGTTGAGAAAAAGACAAGTGTGAGTTGGTTTGTGAGGGGTCTAAGACCTTGGAATGTTGGTGCAGAGAAC  
AAAGCAGAAGCCATGATT

>TCONS\_00030530

CCACTATACAAGCATAAGCTACTGCATTACAAACAAGGAAAGAGAAATCAACAAGAAGACTCTTTTCTCTTT  
CAACCAAGAAGCTTAGGATCATATCCATTACTAGAAGTGGCAAGAATATAATAAGCAACAATATGACCAAT  
AGAGCCCCAAGCAAGAACATCAACAATGTTGAAACCAACAGGGTCATTAGATTTTAGCAAATAACATATTC  
TTTGGCTCTAGAATCACCAGCTTCAAAATGGCTCACTCCATTTTGCTCAGGCAACCCTTGTTTGGCCACATTCT  
CTCTCTGAAAATTGAAGAAAACAAATCTTCCCAAGAATAGTGATAGTCCTGTGCTCAAGCTAATAACAAGTG  
ATGTGTTGAGCTCAGCTTTAACACCAAGATTGCATCTTTTCTTCATGGGTTTGTAGGAATTGGCCTTATTGTTGA  
GAATAACACAAGAATCAGTTGGTTTGTGAAGAGGTCTTAGACCTTGGAATGTTGGTGCAGAGAACAAAGCAG  
AAGCCATGATT

>TCONS\_00030558

AGTCTTCCTTCGCCTTTCGTTGTGTCCAGCCAAACGCCGCCTGCAACTCCTTTTCGATTCATCAAACCTCTCCA  
CCTCGTGAAATCGGCTGCATTGTTGACAAAACCGTTGCCGGAGTCCGGCGACGACGACGGCTTGAGACTTTG  
CATGGTATTCACACACTTTATGCCTCTTATGGTACTGTTTGGCATCACTTAAATCAACAGTACATTTATCAGCT  
TGACAACACCTCATTGAAGTACTTGACCCTTTGATCTTTTCATTGTTATTAT

>TCONS\_00030598

AAGAAATTAATCATGTGTTGTTGTGGAGATGATTGTCAATGTCGTCCTTTAGGTTTTCTATTGGGTCTTCCTTT  
GCCTTTGTTGCCCTTCTCCTCTCCATCGTTGGTGTGTCATCTGGATTGTTGGAATCATATTGAGTTGCATATGT  
CCATGCTGTATTTGCGTAACAGTATTGGTAGAGTTGGCTTTGGGATTAATCAAAGCACCTTTTCGGTTATGAA  
GTGGTTTACTGAGCAAATTCCTTGTTAGAATACACCTTGATAAATTCATCTCCCTAATTTCTAGTAATTCCTTT  
ATGTAAATTTATTTCTGTGGTGAGAGAATAAATTAGATTTATTTTATCTTGTTAAATTTGTCTCCTTTGCCTACA  
AAAATATTCTGAAATTAATTGGTATTTTGTTCATATTCGGTAGAATAGTTGAG

>TCONS\_00030667

CTACCGAGTACAGACGAGCAAAGTAACGGACACACCAAAAAAGAAGGAAACCCGGAAAAACAGACCTTG  
CCTCCTATTCAGTTGGCATTTCGTTTTACAAAAACCCTAAACAATTTGAAATAGCAAAGTGAGAAAGTTTA  
TCATCTTCTCCAACCATGGCAGAAGCAAATTCTGTGACTCAAAGCTCTGAACAGCCCAACAAATTGCCTGAA  
GCTGTGGCAAATCAAACCTCGCTGCCAAACATTCTGAAAATGAAGCTGAAAAAAGTGGCCCTCAAAGATG  
GTCGGGGTTTAGTATTTTAATCTGCG

>TCONS\_00030686

CGTCTACAAAGTCCGGTGAGTGCTGTTGATTACTATTCATCTAAAGTAATCTGCCTTACAGACTATTATGATGG  
CAGATGTGCATGTTTCTGATAGTGCTGGACCCGCTGAAGTAATTTTGAACCCACAATCACGTGAGTTGATTCA  
TTCAGTAAAAAGTAGCTTTGTGAAATCTCATGATCAAATTTGGTAATAAATTATCATAAAGAGTAGGATTTGA  
TTATTATGCTTAAGGTCGATAAATCTATTTCTTTGCAATAGTTATT

>TCONS\_00030707

GAACAAAAACCTTTTGGTTCATGAGAAAGAGCATATCAAAGTGATATTCCAATTTCTCCTTCCAATGAGCAA  
GTTATGCAGTCCACCCAAAAAGTTGAAACAAGTACTCTAGGGAAAGGACGAGGGCGAGAGCTTAGATCTAT  
GTGCTCCTTTGATGAGTCTGAAAATGAGAAACGATTCTTCCATCAGAATGGTCATTATGCTA

>TCONS\_00030900

AGTAGCTTAGGCTTGATTTTAGTCACTATTCCATGTCTTGTTGCAAACGAACTTCGTACCACTGAATGGAACCC  
ACATCTCCATCAATTTCAAGCTCACAAACAGATTTTACTAGGTATTGAACTGCATCATCAATTTCTTCAAATCT  
TGCAAGATCCTTTGGTAACTCATTGCCTGGCCAATTTCTAGCCAACCTTTTAACCTCTCCCTTAATTCTTCCTC  
ACTTACAACTCCTCGGACTTACCAGGTTCCATTAGCACATAAGTCTCTGTCTGTATGTTTGCTCTTCTCCTTCT  
TGTAGCCAATGTCAATACAATTGTTTCGTTTTATTGCACCACAAATGTGTCTCCATTGGAAAAGAAGCTTCTGTCT  
TTTTCTACCGCAGTGAGTTGCAGCAATGATGTATAATAGACAAATTAACAACATGAGTAGTTAAGCACATA  
TCAAAAATAGTTGCATTTCTTAGACTTTGGCGATGAGTATGGTGGTGGATAAGATGATGGTTTTTCAGCCTCATC  
TATATTCATACTGTTCTGT

>TCONS\_00031077

CCCACAAATCATAAACAAGATGCAACTTTGGAGCATCAAGATCGGCACCTCTAAGCATAGACACAATTGGTT  
CGGTAAACTTTAAAAAGTACTCAATCTTATCCACCATTCTGTCATTACACAAGGGATTTAATCTCATGCGTT  
TTATCTTCAATCACTTTGTCTCCCTTATAGTTTCTCCAATCATCATCCATTACCATTCTTTCCAAAGATGCTTTCA  
CTTGATGAACACAAGTCACTGATGACAACATGAGATGCAAATCTTGTTTCGGCAACTTTCAACAAAGACAAC  
ACGAATGCTTTTGAAAAAGAGCATGAGCCATATCATGATTCAACACAAAAATTTTCAAGCTACTAAGTTTCA  
CAATCAAATCTAAAATCCATTTGCAATTTATAAATTGAGTTGATTTTTCGGAAGGTTGGCACATATTTTAGGG  
CAAGGTTCAAACAATGAACAACACATGGTGTCAAAAATATATGTGGATAAGTTTGCTCAACCGTAGAACCGC  
AAGCTTCATATTACTTGCAATTATCGGTGATAACTTGAACAACATTACTTGACCAACTTCCTCAATTGATTTAA  
TGAACAAATTAGCTATATATTCTCCACCCTTCACAATACTACTTGAATTGATTGATTTTAAAAATATTGGACCA  
CCACTAGAAGCCGCCATTATGTTTATCAATGGTCGCCTCTTAATATCCGACCATCCATCGGAACAAATAGACA  
ATCCTTTTCTCTTCCATGCATCCTTAATAGGTTGCAATTTTCTATCAATATGAGCTTTTTCTTGAGCTAAAAGGG  
TAGTTCTTAACCTATTGTACGTTGGCGGAACATAACCCGGTATAGAAGTCTTTGGCAAAAACTCGGAATACTT  
TCTAAAATAAGGAGACTTGGCAAAATTAAGATAAACCTAAAGCGTAGAACATGCGGGCTACCATTTTGTCTC  
GGCGATATTCCTATTCTCAATGCCGAACGACTTCTCTAGAGCTCCAACGTTTGAACCTTTTCTTTTTTACAATG  
CGATAAATCTAACCTTCAGGAAGCGATACGTAATCTGACTTTTCTCTCGCGTCAAGTTGTACAGATGCTTTTT  
TATTTTCAGCTTCTTCATGTTCTTGCTTCAAAGCTTCACAACTTCTCTACTTATGTCTTTACATATTTG

>TCONS\_00031078

ATCTGACCCTTCAGGAAGCGATACGTAATCTGACTTTTTCTCGCGTCAAGTTGTACAGATGCTTTTTTATTTTC  
AGCTTCTTCATGTTCTTGCTTCAAAGCTTCACAACTTCTCTGCTTATGTCTTTACATATTTGAACACCTTGACC  
AGAAATTTTAAACAAATGAGCTTTGACTTTAGAATATGATCCCGTAATTTTTTGTACAAATAGTTACATGACCA  
TACTCTATTTCCACCACCACTTGGAGTAAGTGAAAGAACTTTGACATGGTTC

>TCONS\_00031116

ATAGTAGTGTGCCATAATTAAGTGAACAAAGAAAAATCAACACGATCCTCAAATAGTTGTGCGATATTAAA  
CTCCATCTGCTCCTTTCTTGACAATAATTTTCTCAACCCACTAGAGAAGAAAACGGAATCTATTCTACTTCT  
TGTAAGTAATCATCTATTTTCAAGTTGGTGTGAGAATTTGAATACTTTGTCATTGCCAATGATGCCAATTTCAAT  
GTTTTTTCCGGAGATCTGCCCCCTCAAATCCCTCCTTCAGGGTCAATATAGCAGTGTGTACAGCATCATCAAGTT  
CAATATCCTCAGTGTACCTCTTCTCGAGAAATGTCTTTGCATTTGACACGTTCTTTCCCATCGCTGAAGCCTTCC  
AAGAGAAATATGAGCCTGATGGATCCACCTGATATAGTTGAGGACCTTTGTCATCATACCCCCGCAACCAAGA  
GAGAAACACCAAATGGCCTTACACCACCTGATTGGGTGAATTCCTGCATGACAGCAGCAGTTTCCCTCACCA  
GTTGTGTGACAGGGATTGGTTCTTTATAGAGTCGATAATATTGCTCAGCCTGCTTTCTACTTTTTTCGCACCAAA  
ACTCGAGAATCAGGGCCCATGCCGCTGTACACTACTCCAATATTTGGTGTTAAAACCTGAATCTTTTGCACAG  
ATGCTTCATCAACCAAGATGGATGGCAATTTCTTCTCAGTTGCAATTACAACACCATTAGCAGCTTTAATTCCC  
AGTGATGTTTGGCCCGATCCAACCGCCGTCAAGGCATGTTCAATCTGAACCAGCTTTCCAGATGGACTGAAA  
GTGGTAAGTGAGAAAGAGTACTGACTATCACCCATTTGAATTAAATGCTAATCTTCAATAGAAACCCGGATT  
CCGGTAGTAACTTAACGGAGGCGACGAGCAGCGCCGGCGAACGAGTAGAAAATAGGGAAGTGCGCGAGT  
ATTGGAGCGTTAAGTAGGCTTTGGGATTCAAT

>TCONS\_00031153

TGGTCCACTTTGATGACGTTCTCCAATTTGATGAGGACGTGTCATGTTCCAACGATGACGTGTATTTGAAATTC  
GGGTTTGACCCATATAAAGCTTGGACCCCTTCCACGTCATCAAGCTTTAATTCCTCTTCTTCGTTCTTGGGCTT  
AACTTGGGTACATAACAGCATCTTTAACCGAAGAATGAGCCAGCCCAAGTACATGCCCAATCTCATGGGTC  
GCCACTGATTCCAAATCAACGGCAACTCTCGACCTCTCTTCATCAAAATCAACGGCCACGTTTCCGCTGCGT  
CTAAATGAAACCTCCCATTTTCCGGCGAAAAAGCGTGAGCTAACACTCCCAACACTCCGTCAAACGGCTCTC  
CGTCGCCGTGATCGCCTCTAAAAAACCCGATTTTAATATCCGCCGTGTAGTAATCCTCCGCCTCCGTGAAATT  
CACCGGAATCGCTGACGACCACCGCGAAAAACGCACCTTTTAAAGCCGATTTAATCTCCGATATGTCTATATA  
ATCAATCATGTAATTTTCAGAGAAAGCGTACGATAAAATCATCGGCGATGATTTTATCCACCTAGGTCTCCCCG  
TAAAAATACGCGTAATTTCTCGTTGTATGTAACGAGCTGTGATCATGTTTATGAGCTGAATCACTCATCCCAC  
AACGAGACTCTAAATCTTCGTCGAAAAAATCGGTGAAATTTTGATCGGGAATATTAGATAAATAGCCAAACC  
GTTGGAAGTATTTTTTCAAGTTCCGACATGCCGGTGAGTTCACTTCCTTTTCCGGCGTCGAGGAATTTAACGAAA  
GCGTGCCACGTGTTGTTTTGAATATCGGCGGTTAATTCAGTTAAAGGATCGTGTTTTAGGATTCTGGCGGGAA  
AAGAAGGAAGGGAAAGGAGGAGAATGAATGGAGCAAAAGTGTAATAATAACTTGGAACGGAGACATGG  
AGTTAGTTTTTTCTGTTGGATTTACAAAGAGATT

>TCONS\_00031276

CTCATCAAATTCAACAACAACGGCCTCTGACTGATGTAAGCATATGCCTTGACGGCCTTACTGAATACTGAAG  
CATATGGGTTTTCTTGAATATGTACCAAACATCAAGTTGATACAATGGGCAGCACATGGAGTCCAATAAAT  
GTTTGATAGATAGCTTCCATCATCTTCCCCGCACTAACATTCTCACTAGCATTATCTGTAACAATTTGTACAA  
CATTTTCCTTTCCAATTTTATCAATAGTATTTCTAAACAAGCTGTACATTTTGTCTCCATCCGTAGAAGAGTTGC  
TAGCATCGTGAGATTCAAGAAAAACACTCCCTCTTGAGAGTTTACCAACACTTTTATGATCATTTTTCCATTC  
CGTGCTG

>TCONS\_00031283

ATCTCGGAAGCTGCATTAAACCCAGTTCCTAAAACCCCAGAACCTCTCGTACAGAGAAAAGCAAGTTTGATC  
TAATACTGTTTCGATAAAAAATGCAGAAGAAGAGCTTCACTCTCCTTCAGACAATTGCAATTTTCAGGTGTATTCT  
CTGCCGTTTCTGGCTGAGAGTCAGCTCGGAAGGAGCTAGGAGGTTTGATTGAAAGTCTCCGCAATCCCAATTC  
TGACCCCGTTTCACCTCCCCCTCTCACTCCTAATTCTAGCAGGTATTCTACACTTTTCTTCTCTATAAC

>TCONS\_00031284

ATCTCGGAAGCTGCATTAAACCCAGTTCCTAAAACCCCAGAACCTCTCGTACAGAGAAAAGCAAGTTTGATC  
TAATACTGTTTCGATAAAAAATGCAGAAGAAGAGCTTCACTCTCCTTCAGACAATTGCAATTTTCAGGTGTATTCT  
CTGCCGTTTCTGGCTGGTATGGGTTTCATGTTCTGGGAGAGAGTCAGCTCGGAAGGAGCTAGGAGGTTTGATTGA  
AAGTCTCCGCAATCCCAATTCTGACCCCGTTTCACCTCCCCCTCTCACTCCTAATTCTAGCAGGTATTCTACA  
CTTTTCTTCTCTATAAC

>TCONS\_00031285

GGTAACATATCACAACCTAAGGAAATATACTCTGGATTTCTCCTGCCTGATCTATCTGTGTAGACAAGATCTG  
GGTTCCTCCCGATATCTTCAAGTACCCATGGAGGTAGAGGAATACTGCAAGAGTCTCCAACATTTCTCCACA  
CTGATGAAAAGACATAACAACCTTGAAGTTTCAAGCCATGTTCTTTGCACATCTTAACAAGTTCAACATAACCT  
TCCCAATTATATTTCAAAGGTCCATCTTTTTCAACCAAACCCACCAAGCATCTACCATTACTCCTTCAATTCC  
AGCAGTTTTCAGGCCATTAAACTCACGTGCATCGCTCGTGGCTTGTTCAAGTTCCTCCCATAGTCATAGT

>TCONS\_00031287

TTGAGTCACACTCTGGACGTCTAGCATTTTCGGCCTCCTTCTGACATGCTTTTCACGAATTGCCCTAAATTCTGC  
CAATTTTCTGGCTCAAACAACCGTTTGTTTCATTCTCAGGAATGTAAATGCGCTCAATGCATTTCCAGAATCTGA  
CCTGCTTGTTGCCAAAACCTTGAGAATATGCTCCACCATCATACCTCTCTAGAGCATTTTCTCCAGCAAGTTCTA  
CTTCAGAAGTTCTAGTTGCTTTTTTTACTTGTCGAACTAAGCCTTCTGGTGAGCAATTTGCACTCTGGGGCTGTT  
CACCATCCCTCATTCCATACATGTAAAGTTAAATACAACACGATGTTTCCCGAACATACGTGCGATAGGTAG  
ATAGCCATTTGTGTGTCTTGTATTATAGTATC

>TCONS\_00031288

TCTCGTATTATAGTATCCTGCTGTAACTCTGCAGCATGTGATCTAGTATTGTAATGCCAATGAATCCCAGCTA  
CCTTTCAGATAGTTTAGCCCCAGTCCCTTGATATATACCCTCTGCTGCTGCTAGGATTCTGTGCGCCGTGCTCC  
ACTAGCTTTCTGAATACCACTCCAGGAAGAAGTGTCCATATTCAGTGTCCATGTTCCATCTCTTTGAAAAAA  
TCCAGTATCCTCAGGAAATTGGTTGTACTGTCCGGAGTCATGAGGCCCTCCCTGGCCCCAGTCATCCTTTCCG  
GCCGCCTTGGCGGCTGCTGCTAGTGAAGCTCTCATCTACTTGTATAGCACTGGAATTCTCCAATTCCAGGAA  
ACCTCCATGTACCATTGCTTTCCGGATAAGATGGATATCTTAGCTCCCCACAAGGACCCATTCCCACTTGAAT  
TTCCT

>TCONS\_00031289

TCTTCAAGTACCCATGGAGGTAGAGGAATACTGCAAGAGTCTCCAACATTTCTCCCACTGATGAAAAGAC  
ATAACAACCTTGAAGTTTCAAGCCATGTTCTTTGCACATCTTAACAAGTTCAACATAACCTTCCCAATTATATTT  
CAAAGGTCCATCTTTTTCAACCAAACCCACCAAGCATCTACCATTACTCCTTCAATTCCAGCAGTTTTTCAAG  
GCCATTAAACTCACGTGCATCGCTCGTGGCTTGTTCAAGTTCCTCCCATAGTCATAGT

>TCONS\_00031429

TTCTCGAAGCTTCTTGTTCGTATCTCTCATCAAAAGGTGCTATTCGATAATGTCTGTCTAGCAGACTCCCTGCT  
AACCCTAGTGAACATTCAAATATCTGTCCTACATTCATTCTTGAAGGTACTCCTAATGGGTAAAGACCATAT  
CAACGGATCTTCCATCTTGTAATAAAGGCATATCTTGTCTAGGCAAAATTTGGAAATGATACCTTTATTTCCG  
TGTCTTCCAGCTACTTTATCGCCTACTTTGATTTACGTTTCTGTAAATATATACACGAATCGTTTCGGGATTA

TAACTAGAACCACCCCTTTTCTGGATCCACCTCACATCAATAACCCGACCCCTGCCACCTATAGGTAGTTTGA  
GACAAGTTTCTTTTGAAGTAGATACCTGAATACCAAGTATAGCTCGTAACAATCTAT

>TCONS\_00031456

AAGTCGTTTTTGTTCATCCTTCAACTTCTTCGTGTGGGTTTCCTCAAATACCTCATCATGAGTAACTGGTCTTC  
CTTTAGCATTTCCTCAATCTTCTTCGATGAGCCGCAACACTAATTGAGCCGCCCCGTGTGCACCGAGCCACCCCTT  
GTTGGACAAACGGGCTGCCTTTCTTGTTCGCTCTTCTTCTTAAATTCCGGAGAATTCCAATACTCAAGAAGTT  
TAACCCATAAATCATCAAGAATCCAACCTGGCCTCGTATTACTTTCTCAAGCAGTCCGAAGCAGATCAGGCA  
ACCTATCAGAACATTTCTTAAAG

>TCONS\_00031457

CAGCACGCGGCTCGATTCAAGTCGTTTTTGTTCATCCTTCAACTTCTTCGTGTGGGTTTCCTCAAATACCTCAT  
CATGAGTAACTGGTCTTCCAATCTTCTTCGATGAGCCGCAACACTAATTGAGCCGCCCCGTGTGCACCGAGCCA  
CCCTTGTTGGACAAACGGGCTGCCTTTCTTGTTCGCTCTTCTTCTTAAATTCCGGAGAATTCCAATACTCAAG  
AAGTTTAACCCATAAATCATCAAGAATCCAACCTGGCCTCGTATTACTTTCTCAAGCAGTCCGAAGCAGATCA  
GGCAACCTATCAGAACATTTCTTAAAG

>TCONS\_00031472

TTCTTACTTGCCTAAAATTTATTTAAAAGGGACAAAAGTCTCTCTTCTCATCTGAACACAACCTTCCCTCAACCC  
TCCTCTCCTAAGATAACTTGTAAAAGTTCCAGTTTATGCAGGGGGAAACCCCCACGGAGGAATAACATATCT  
TGACTACAATCAACATTTACAATTGAAGAAAAGGCAAGAAAATCGAAAGAAGGTGATCTTAAAGCAATACA  
GTCATATTTAAGAAGATTTACTCAATATGCACTAAATTGGATATTAAGTTCAAAGTCATCAAAAGAAATCAA  
ACACTTGTGTCCTGATCGAACGATCCTCCAATCATCAAACCACAGATGCTCTACTTTGATTCCATTGAAAGTG  
GCACGGCAGTATAGATGTGAGGTGAGTTGGTTTCTTCAGATTCCACGCGCAACCAGTCCTGACCACAAACCA  
AGGCTTCTCTAGCAGCTGCATTCACTGAACTGCGATCTTGGTCAAGCACCTTGCCTCTGTTATTGAATGCCACC  
TCTGGCCCAAGAGTGATGCAGGAACCTCCCAAGATATCACGTGCCATCATTGATAATGTAGGGTACCTTGGT  
GTGTGAACTTTCCACCAATTCAATATGCTGAAATCATAATTGCGTGGAAGACTGGCTCTTCCAAGTATTTCTC  
AAGATCTGACGTTATGTTGTGGTTTTGTGAAGTTTCATGGAGAAATTTGTCAAAACCCCTAAGTCTGTCCCTTG  
TACCACTAGAGATACTGGTTGAGCTGCCAGAAGTACCAGCTGTATCTGGATCAAGCGAAGATGAGCCCATCG  
CATACTCATTTGAAAGCTCCCTTATAGCATCAGATATTTCTTTTATCTGATTTGAGGCATCAGAACCATAAATC  
TGAGGATAGTAATACTCCACCAACTTCATCTTGAACCTGGGGTCCAATATTGCTGCTACCGCCAAAGTCAAAC  
TGCACTTACTCCAATACTTATCAAACCTTTCTTTCATCTTCAGCGCTATATCGCTAAGAAAATTATCAGGATTTT  
TACACCAATCAATCAACTGGATGTGAATATCACATATTTACGGGAAATATAGATTTCGCAGTTGAACATTTATT  
TGCCGTGAAAACATTAGTAACTTCAACAAAAAGTTTTATATAGCCCGCAATAGCACTAGCATGATCCCACTCT  
GCTTCAGACAAAGCGAAAGTGTAGGAAGGGTCGTGCTCTTCTAGTAGACAGAAGGCTCCCCTATGATCTAAG  
GCAGCTTCAAGCATCAAGTATGTTGAACTCCACTGCTGTCCACAGTCAAGAATCAAAGGCCTTTCACCACTA  
ATCGCAACTTGCTGAGCAATCTCATTGAACTTTCCTAGGGCTAATTGTGAACTCTTAACATGCCTTATGCTTTC  
TCGAACCTTGTGGATCACATCTCGAAGTGCTTCCATGACATCGAAAACGATTGATTTCACTAGCTGCACTGCA  
CAACGCATGTCAAACAATTCACCATTCTTTAACAGCGGCCTGTTTTGAGAAAGCCAGTCCTTGATTCTAATAA  
TCATCTCATCATAGCCTGTACAATGATCGAAAGTCATAGAAAACAACCTTACGATCAATGGCCCAGTCTGTCA  
AACTTTTTATAACAACCTTCTGAAAGTATGTCATCTGTGTGAGAAGGATCCAGTGTTATGAAATTCAGCATTTTC  
TTCTGCAGTTTCCAGTCTTCATCAATATAAAAAGCAGTTAAACACAGATACCGTGCATTTTCAGATGAAGTCC  
AGACATCAGCAGAGAGAGTAATTCTTCCATGCAAGTTATGGATCGCCTCATACACCTTCTGTTTCTCTTTTGCA  
TAAATTGTCATACAGTCAAGTTCAACAGCACTGTTAGTCAAAGTCTCAAATAGTGGCTGTAAGTTCTTGACAA  
ATATTTTGAATCCAACATGGTCAACCATGGCTAAAGGATAACCATGTAACATGATCATACGGGCAAGATCCA



GACGGCTACGCTCTTGATCAAATCTAACACTGCCAAGGTTGATAGGCATAGTAGCTTCCTCTTTCTTTACTTCT  
 TGATCAAACCTTAAAGGTCACAGGGTTAACGGTTTCTTCTTTCTTTGCCCTTCTTCATAAGTGACAACTGCAAC  
 AGTAGTATCTTTTCTTCTCCTCTTTGCTGCAAGTATTTGGGAAACATCATAGTTGGATCTTTTTAGACACCGCAA  
 CAAATGATTCCTTAGATGAGTTGTTCCACTGTTACTCGATCCACTAAGCTTCTTTTTACAATGTACACAAACAG  
 CATAACAGATATCTGCCTTTCTAACTCTTTCAAAATGATTCCACACAACGGATGTCAACCTCTTTGGTTTCTTT  
 GCTGGGGTCTCAACTGGAATTTCCATGGCATGGATGAAGCTAAATTAACCAATCTGTTTTCACTGAAATGGTT  
 TGGCCTAAATGCTAGAAAGTGAAGAGCTTTTCGTTGACGTTGTTTCAGAGAGAGATCCGATCAGAGGATCCGA  
 GAGAAAATAGGGTTAGGGTTTGGATTGGATTAGAACGGAGAAGAGAATATGAACCGGATGTTGAGACCGGG  
 AACCGGGAAGATCCGGTAAGAATGGCCCGATTGCGTGATTGTTGGGATTGTTGGTGGTTCACACATTTGTGAAGTC  
 CGTTTTGAG

>TCONS\_00031484

CATAATCCTCTGCCACAAAGTAACAAGCTGGCTTGCAACATTCCTGTAGAAATCGCCATGGTTTACCCCAT  
 GGGAGCACAAGCAGGGAAGAGAGGGTTCTTTTTAACTTCTCCCAAACCCGAGCCAATTACCATCACTGCCAT  
 ATCAAGATTGAAGGAATGAGGAGTATAGGTGAGAACTGATGGTGGAGTTTGTTCCTTTGTCCATGCCATCA  
 ACAGGATCAACACCGATCAATACTGAAAATTTTCGGGTAGTAGAAATATTAGCAATTTTTCCAAGAGCTAGC  
 GCGAATGCAACTTTTCTCCACGACTATGGCCTGCTAGTCCAAGTTTTTCAAGTTTGGCTCAACATCGGATGG  
 AAGGTAATGGTGCAATCCTTCAGCTAACCAATTTGTGATTTTCAGCAGTTGATTTGATATCCTCAGTTGCATCTG  
 CTCCTTCCACCAAATATAACTGAGGAGCCACAACAATGAAGCCATGAGAAGAGACATGTTGAATAAGCTGA  
 GTATAGAAAGAATTGTAAAGAAGATAGCCATGAAGAAATATCAGTA

>TCONS\_00031533

CTTGGCATTAGCCTGCATAATCACTTTACGAGGCGAATGGCCTCTTTAAGATCATAAACAGCCTTTTTCTTCTT  
 CTTTTCATCATCACTCTTCACGTTAACCAATGTGGGAAACGGAACCATTTCTCTTCAACATTCAAACTCTCC  
 TCATTGCCGCCCTTTTTTGCGCCTCAATTCTTCTCTCTCTCTCCAGCTCCTCATCACCTTAGCTTCCACTCC  
 CCCCTCTCTTCAACCCGATCCTCAGGTAACGGAGCTACTCGGGTCGGGTAAGAAACCGGAGTTATTTTTGGT  
 GCATCCTTTAAGTATCGGAGATCCTCCCGTGTCCAAGTTTTACCATCCGCATTAAGTATTCTCGAGTATTGA  
 TTCGGGTCGGGTACCATTTTGTGTTTGTGATTGTGGGGAAGCTTGCGATGTGGTTTCTGTAGATGGGGTTCCG  
 GAGGATCCTTGGGTTTGTAAAGAACGGGTTGGACTAGACTCGGGTTTTCTGGGGATTGGGTTGTGATTGAGA  
 TGATGAAGAGGAGAGAAATCGGTGGAAATGAGAGCGAAGAAGAGGAGAGAAAGTGAGATGGAGTTTGTAG  
 GAGCAGTGGCGGCGAGCTTGAT

>TCONS\_00031593

CCAGGTTCAAGTTTCTCTAATATGACAGCTATTGATAAATTTATCAGAGAAGTTGACATACTTTGTCCACAAG  
 GGTCGAAGTTGAGGGAATGCTATATCTAGCCAAGGTTTTGCTCGACCGTTGAAGTGATCACACCAGCACTTT  
 GAGCGTCCGCAATACTCGTATTATCTTGGTACCCGAGTCCTAGCATGTGCCAGAAGGATTCAATGGCATGGAC  
 ATGACCGTGAAATGCAATTAGACCTGGAGGTGTCAAAGGATGTAATGAAAACCAAGCTTGCATCGGTGAGA  
 AGGTTTTGCTATCCGTGATTATGTGAAGGACAACTCTTTCAGGGCGGAAAGAGTTCTGGACGAGCGATGATGC  
 AACACAGAAGCAGCAAGAATATTGTCAGAGGCAAGGACAAAATGGAAATATGAATTATCAACCAGGGCA  
 GGAACAAGTTCCGCTGATGGTAATTGGAGACGGGCATTGGCGTTGATAGAATACTCATGCGCTAGCTTGAGA  
 TCAAGACAGTGCAGCTGTTTCGGGATGCCACTAGATGCCACATGCCGATAAAGGTACTCTTGAATTTTGGCAG  
 TTCTTGTTGTTTGTCAAGGAGAGTTACCTGCAATAAATAGGCACTAATTTTTGAAGACATAATTCAGTAAAA  
 GTGTACTACTCTCTAATAAGTTAATCTTTTAGATGAGACAGTAATGATTCTACATGGTATCAGCTTAAGCAG  
 AGGTAGGTCCTGAGTTCGAGTCTCATTGTCATCCATTATCAA

>TCONS\_00031597

GAATAAGTAGCCTCAGGTAGCCTAGAACAAAATTTTGCAGGACCTCATCTACATAGGAAGATCGGGGTCCAA  
ACGTCTTTGGATAGCAGCTGCAGCCTCGAAGTTGCCAAGCTTGTATTGATAAGCCATCTCTTCTTTAATTGAG  
CTTGTTCTTTCATTGCTTGTGCCATTCCACTCTGCATCTCCCGCTTCAATGCTTCCACCTGTTCTTCCTTGTGCTT  
TTCACGTTCTCGCAGCAATTCTTGCTGCGCTGTTCTTCATCATCGAAGACAGTACGTTTCAGTATCCACGACCT  
TCTTGATACCTCTTTTGTTCCTTTTCCATTTTACGTCTATAATAGGCATCAAGGTTATAATATTTTTTAGAAGG  
GAAGGTTGCGGTGTTATGATCCTCCATGAATTGCTTGAACAATTGCTTTTCTTCCCAGTTTGGCAGGCTCTCCA  
GATTCACCTTCTTTATTTCTGCTAACCATGCGGTAAACTCTGGTCGCTTGTTCACATATCAGTTTCCTTGATAA  
TTCCATATTTGCCCCAAGAGTTCGTAACAGCACCAACTTTCCCCTTCTCTTTCTTCTTCTTCTTCTCTCCTTCTT  
CTCTTTCTCCTTCTTCTTCTTCTTCTTCTTCTTCTTCTTCTTCTTCTTCTTCTTCTTCTTCTTCTTCTTCTTCTT  
CTTTTCTTCTTCTTCTTCTTCTTCTTCTTCTTCTTCTTCTTCTTCTTCTTCTTCTTCTTCTTCTTCTTCTTCTTCTT  
GTATCTGAATA

>TCONS\_00031602

ACTACTCGGCTTTAGACGGGAAATGGTTTCCGCCGGTGGCGATCTTATACAGGTAAAATCCAGTCATTACCAC  
ACTGAGACCAGCAACAATGCCAGCTGGCATTATCTTTGAAGTTTGCATGTATCGCTGACCCATGACCCATGTT  
AGTACAGCAGCACAAGCAGTTTCAAGAATCAAGGCAAAGTAAGAATTTTTGCGCTTGTGAAATGCTTGAAGA  
CTCAAGTAACCAGCTAAAATGAGCAGAAATCCAGTACCCAAACCTCCAGCCAGTGAAGCTGTGCTTCCTTTC  
TTGAAATATCCTATAATACCACCACATACAAGAATTAATCCATATGGGATTGTGAAGCAAAAATCATGCATTT  
TTATCAAATGGGGTTTAAAAAAGATTGATATTTTCGACGAA

>TCONS\_00031621

AGCAGCAAATGGAAAATGAGTATCTTCATAGAGCTTAAGTATATACTTTAAACCAGTCGATGTACCTAAGTT  
AAACAAGTATCTTCATACAGAAGACACCTTCTTGAAGAAAGATAACGCCAGATAGGCGGTATTTACAAGTT  
TACTAAGACGTATTTACACGGGCAGTTTGAAGTGCATTTTTAGAACGATCCGAACGTATTCTCTCCACTGTAAG  
TCATGTACAGGAAGCCATCCTCATCTTTGTGTTTCCTCATAAATCGCGGACATCATGGCAGCTGTGGGAGGAAG  
GATATTTTACAAAGATAAAAATAGCCTTCTCAGCACTAAGCTTTATCCTCTTACGAACAACATACACAAATT  
GCCCCACAGTCAGATCAGCAGGAACCAAGTATTTTTCTTGTCAATGTCAGGAATGTCACCTTCTTTACGCCTTC  
TCCACAATAACCGGTATTCTATCAGGATACTTCTCCCTGATACGAGCAGCTTCGGCCTGTGCGCTTTCAAGTG  
GGTGTTCGAATTTGAAGGAGCTTTTGGCCATGGTGATCGATTAATGTGTCTAGTAAAATAAGTTAGCTCGAC  
GAAATATTTTACGGAT

>TCONS\_00031632

TATTGCACCATTTGGCAAAGAACCTGGATATATATATTTCACTTTGCAGCAACCAGAGATGATTATTGCACCATC  
GACAGAGAACCTGAATATATATTTCACTTTGCAGCAACCAAAGATGACTATTCCACCATCGACATAGAACCTG  
AATACATTCTCTTCGTGCTGTCTGCTTCATCCAGAATGGAACATGGGATATGTATAATTAAGTACCTTGGAT  
TCTTGCAAACCCTGAATCATTGCTAAAGCTGCTGAATTCTCTGCATCTTTTACTCGTGACTTCTCGTCTCCCGTC  
ACAGAAAACACATTTTACCAATTGAAACTGCACAGAGCATGCAAAGCTCCTATTGTGAGCAGGACCTATC  
TCTTTCTCTATTACCCAGAAAGAATTCACATCGAAGCCACAATCCACATATACAGCCCCCATGACCGACTCC  
ACAATGTCTGCAAGAATTTTTGGCGCTTTCATCACTCCTCCATAGAACTCCATCTCAGCCTCCTGTTGCACTGT  
TATCACGAATTC

>TCONS\_00031722

TCCAGCTCCCCCAAAGAATCATCACACATCGTCATTTTGAGCTTCTGATAGCCAACCGTAACTGTGCATTGA  
GACAGTCAGCATGGAAGTCATCAAGGCCGAAGCAGTGGCTGTGTGGTATGGTTGCAGTGACTCCACACAAGC  
GCTCATCTCAGCCGGACACCTGAAGATACGATTGGAGAGAGCACTTCTAGAAGCTGCGCGAAAAGATGAAG

GAGCAGTTTTTCGATTCGGATGCTATTTTGGGAAGCGGAATTGCGGACAGATGGTGACCGGAAAACGGACCTGG  
CGGCGGCCGATGCGGCGGCGGTGGCC

>TCONS\_00031769

TACAAGGTGTATTCTAACAAGGAATTTGCTCAGTAAACCACTTCATAACCGAAAAGGGTGCTTTGATTAATCC  
CAAAGCCAACTCTACCAATACTGTTACGCAAATACAGCATGGACATATGCAACTCAATATGATTCCAACAAT  
CCAGATGACAACACCAACGATGGAGAGGAGAAGGGCAACAAAGGCAAAAAGGAAGACC

>TCONS\_00031824

TCTTTTATATCTCATCTTTGTGTCATCAGGCACTGTTGAAGGCTTGGACAATGGCGTAAACCGCATTTACAAA  
TTTCAAAAGAATGGAGTCAGAGAAATACCAAGAAAGTTGATGATGCTAGATGCTGTGTTAGATTATGACTAT  
GCAGGACCTAATCCGAGGCACGAACCCGGTCGAAAGAGAGGTGGCAATCACCCCTGA

>TCONS\_00031828

TCTTTGGTCTTCTTAAGTCTAGTTCTTGTAATTGATCTCTTTGTTTGCAACTTTATCGAGCTGTCTCATATCAAAT  
TGCCATAGATGTCTTAAGTTGAGACAATGGAAGCTGCTTCTGCAATATAGGTTGCCTTAGCAACGTAATTA  
CCAGCTTAAGGCCTGCAGCATATCAGAGCTCTCTATACAAAAAATTAATGCTCAACTTTGCTATCCAGTTTAT  
GTTATCTTGCATTTTCTTGTGAGGTTTACCTTTTTTGACACCACAAGCTGCTTGGACAATGACTCAGCAATA  
AGTTGATGGCCAAACAAGTGAGAGTTCTTCAGAATCAAATTCCTTGTGATGAATCAATAACATAGCCTTGAC  
CAGACATCCACTCCAGTAACTGCAGAAGTAGTTCCTTCTTTTCTGGTTTTGAAACGTAGCGTGATATAGCCAT  
ATCAAATAATTCCTGATCAATCCTGTGGCCAGAGCTGTGCATGGCCTTCATCACATCATTGATTAAGTTTACAT  
TGCCAGATCTCATGAAGTTGACAGCAAACCTTTTGATAGCCGGACGGCCGATGAATCCTGCATTGTCCTTGAC  
AACTACATAAGCATCTTTGAGAAGGCGCCCAGCAATCAAATGTGCAAAATCTTCTCATGAAGGGATTTGGA  
TATGGTTCTTTTGTATATCTCAGCATGTTATATACAGAAAATGCTTCTGAATGTGCATCTGTCTTACCAAGAT  
GATAAATTAAGAGGAACAAAGTCCCTCCTCTAGCTGGTGACCTTTTCTATGCATGTCCTCCATGGTACGATA  
AGCAAGCAAATATAGCTTCTCCTTGAGAAAATATCTTATAAGAATATTAAAGGTATTCCAATCAGGACTAATT  
GCAAAGTCATCCATCTTCTTCATCATGCTCATTACATTCTCTATATCCCCTGCTCTGCAATAGGCAGAGAGCAT  
TGCATTCAAATAACTACATCATATTTTTCATATTTTTCTTCAAATTCAGAAGCTAATTTCTTGGCATCTTCGAG  
AAGCCCACTGCGGCAGAATGCTGAAATCATAATGCTATAAGAGTATCCATCAGTTTTACATGTTTTT

>TCONS\_00031861

TTGCAAAGAAATAGATTTATCGACCTTAAGCATAATAATCAAATCCTACTCTTTATGATAATTTATTACCAA  
TTTGATCATGAGATTTACAAAGCTACTTTTTACTGAATGAATCAACTCACGTGATTGTGGGTTGAAATTACT  
TCAGCGGGTCCAGCACTATCAGAAACATGCACATCTGCCATCATAATAGTCTGTAAGGCAGATTACTTTAGAT  
GAATAGTAATCAAC

>TCONS\_00032017

CCACTACTTACTTTTTCTCCTTGCTCAGCACCATAACCACTGTAACCCCTTAATGTTGACAGGTCATGTGCTCTC  
TGTGCCATGGCAGAACTTATGAATTCAGGAATGGGCTCAGTAGTGACCAATTCCAAGGCTTATAATTTGAG  
CATCAGGGTGTTC AACATGTGTGCAGATCTCCTTCTTGCGATCTCAGGAAAAAGATAACCAGCTTGAAGTTT  
AGCTAAGTTCTCATTGCGAGAGACCTTTGTCTTGTAAGAAGTCTCCGTAGAGGGTGTGCAACACATCTGACA  
ATACCACCGGTTTTGCTTGGCAGTAACACATTCTGGCTCCTGAGACGGAGTTTGCTGACCCAATAAAGTAG  
AAGTTGATGAAGAGATTGAAGTGGAATAATTTGCTGAATAGCTGCCATTTTTTTCTGTTAGAACAAACCACG  
TTATCTCACTGGAGTA

>TCONS\_00032019

CTACTGTGATACATTACATCCTTTCTGTTTTCTTTTAAGGGGAAGCATCAGCGAATGCAGAAGCATAGACGAG  
GAAGAATACATGGAGTTATAATACCACTAGAAATCTCGAGGTGCAGGATGAGCGTGATATTATATCCTCCAT

GCTATTACCTCTGTAACCTACATTTACGAAGAAGAGCAGCAATAATTTGACGAGTAGCATCATCAGCTTCTACT  
AATAAAACTCTAAGCACCATTTTCTTCATACACTGACCATCTCCTCCTCCTCCTCCTCCT

>TCONS\_00032038

CTACCATCACCAGACATAAAATGTTTGTTGTTATAAGTTATGCAGATTCTTCATAGGATTCTTATCCGATAGC  
AAATTTATTTCTTGTTTTTAGCATATGTTTAGAATCTGCTCTAGATACTAGTATTTCTAGACATTGTGTCCCTTG  
GTCTCTCCGGATTTGTCTTTACCTCTGAATTTTCATTTGGACCTACTACTGCATGGTCCTTATCATGCTTCTCTTT  
TGGTCCCCATATTCAAGGCGGGAATCAATTAGACGAACCTCAAACCTGAAGGGTGCTTGGGACCGTCCTTATC  
CCACTAACCGAAAAAGGTGTATATTCAAAATTTTGATGACTAACTTAACTTGAAGCAATGTGGACTACACATT  
CTTTCATTGCAAATGAACATTTTCAGTAGAATTTAGGAGCATAACTCGACTGTTTGATTAACAAACTCCCACT  
GGCAGCGTCTCTTTTGGCATGGTTATCATCTTTCTTCTGTTGTGATAAG

>TCONS\_00032100

GCCAAATAAAGAGAAAAGAACCAATGATAGAAATCCAGAAATAGATAAAAAAAAAACCATACTCTTCACAT  
CAGCCAAACTGACTACATTCATGCAGACATAACCTGCTTGATAATTCCAAACGCGAACATAACAGGATAAAA  
GCTATAACAGCTGAAAGGAGTACAGAGCCCTTGGAACACAGGCTACACAAATACTGAGACAGTGCTTGAAC  
CTCTAATATTCATCTCTGTAAATTCACGAAATGATTACTCCATCACTTAAGATGTTGGGAGATATCTTTTCGGCA  
TCACTTTTCCACAACCAATCCCCACATTGATATATGCCGTCAGATGAATATAGTCCAAATACCATAGAGCAAC  
AACTTTTACAGCTTTATCCGATGAACATACAGCGAAAAGGAAACAACGACAAATGCCAAATACTACATAAA  
CCAGGGGACTCACCAACAGTCAGTGTTTTACCGGACCTATCCAGTGTGAGTATGTACTGCTAAATTCTTTTTTG  
ATCACTTAAATTTTTGTCATTAGATCTAAGATGAACTCCATTGTCTCAGCAACCGTGAAACAGCCAAGTTATC  
CATTCTCTCAGACTCCAAGGAGTGGCATACTTCAACTTGAGATTTCTATACAAAAGACTCACCATTGGTGCA  
CCATCAAACATGCAGATAAATGATCACTGGCAATATATAGCCTGATCTATGTGCGGCGGAATTTGCTTGATCT  
CTGTTCTAGCTCTTGTTCAATTCGATACAGATTGAAGCGATCCTCAAAGGTAATCAGGTTACAGCTAAACC  
AAGATGCCCAAATCTCCCTGAACGCCCAACCCTGTGTAAATACGTCTCTGAGTTCTTCGGGAAATCAAAATTT  
ATAACGACATTGACTGCTTGAATATCAATCCCTCTAGTAAACAGATCAGTACAAACAAGGTTCCGGCAAGCA  
CCATTGCGGAAGTCATGAAACACTCTGTTCTGTGATCTTGAAGCATCTTTGCATGGATGTAGAAGCATGAAT  
AGCCTAGCTCTGTAATCTTCTTGGCGAGAAGTTCCACACGGTTTACAGAGTTGCAAAAGATAATTGATTGATT  
GATTTGAAGCTTTGAGAATAAAGTGTTGAGGCAGTGAAGCTTCTGCCTTTCTTCTACAAAAGCATAAAACTGT  
GTTATACCTTGAGAGTGAGTTCGTCCATAAGGTTGATAACATATGGCTTCTGCAGAAATCTATCTTTGAAGTC  
CTTGACTGTGACAGGGAATGTAGCAGAGAACATTAATAATTTGACGATTTGTTGGCAAGAAACGAATCAGCTG  
CACAATGGAAGGTTGGAACCTCTGGAGAAAGAAGCTTATCAGCCTCATCCATGATAAGCATGGAGCAATCTTT  
CAAAACACATATTCCCTTTCTCGCAAGGTCAAGTATTCTTCCAGGAGTTCCAAGTAGTAAATGAACTGGTTGA  
TAGAGTCTCATTATATCATCCTTCAAGCTGGTACCCCCAGTGGTAACCATGACTTCAATTTTTAAGTGCTTCCC  
AAGTTCTTTACAAACCTGAGATGTTTGAAGAGCCAATTCTCGTGTGGGAACAAGAATAACAACCTGAAATGGC  
ATTGACGTCCTGATCAATTTTTTCCAATGCCGGAATGCAGAAAGCAGCAGTTTTCCAGTTCCATTTTTGGCCC  
TAGCCAGAATATCACTCCCAGTAAGAGCGATTGGGATACTTTCTTCTGGATTGGAGATGGTCTCTCAAAACC  
CTTCTCATAAATTTCCATAAGCAATTCGCGCTTAAGAAAATAGTCTTCAAATTCATTTCCCTTAGTCGCTGTCA  
CATCCTCTGTCCTGTATCGAGTATCAGGTGCTGGTATGTTCAACCTCGCCTCCAGTCTTGTGAACCTTTGGTCA  
AGTGCTTCAGATTGAACAGTCTTTTCAACCTCATCGATGGACGAATCAGATGCCGCCAACTGTTGGTTCTTCT  
GAGCCATTGCTGCTGCTGTGTTATCTGTTGTTGTTGTTCTGATAATGCTGCTGCGGGTGCTGCTGCTGGTGATT  
CATCGGATTTCTCTGCACATACTGCTGCTGAGGGTTTCTTGTGAAAATTAGGGTTTGCCTTAGGGTTAGGGT  
ACATGTTTCCGCCGCCACGTCTCCGCCACCGCTCCCATTTCCCGCGCGCGGATATCTTCCCCCTCTCGGATTC  
ATCGCCAATAAAGAAAAAAACTAAGAATTATAACAAGCGTAAAATGAAGAGAAAATGAATTAGCAATA

TAAC TTTATGAATCTGAAGAATCTGTGGTGAATTTGACGAAATTGTGAAGAAAATTTTAGTGAATTGGATGAA  
ATTTTAGGGGAAATAATTGCAGGGATCGTGGGCCTAGG

>TCONS\_00032101

GCCAAATAAAGAGAAAAGAACCAATGATAGAAATCCAGAAATAGATAAAAAAAAAACCATACTCTTCACAT  
CAGCCAAACTGACTACATTCATGCAGACATAACCTGCTTGATAATTCCAAACGCGAACATAACAGGATAAAA  
GCTATAACAGCTGAAAGGAGTACAGAGCCCTTGGAACACAGGCTACACAAATACTGAGACAGTGCTTGAAC  
CTCTAATATTCATCTCTGTAAATTCACGAAATGATTACTCCATCACTTAAGATGTTGGGAGATATCTTTTCGGCA  
TCAC TTTTCCACAACCAATCCCCACATTGATATATGCCGTCAGATGAATATAGTCCAAATACCATAGAGCAAC  
AACTTTTACAGCTTTATCCGATGAACATACAGCGAAAAGGAAACAACGACAAATGCCAAATACTACATAAA  
CCAGGGGACTCACCAACAGTCAGTGTTTTACCGGACCTATCCAGTGTCAGTATGTACTGCTAAATTCTTTTTTG  
ATCACTTAAATTTTTGTCATTAGATCTAAGATGAACTCCATTGTCTCAGCAACCGTGAAACAGCCAAGTTATC  
CATTCTCTCAGACTCCAAGGAGTGGCATAACCTTCAACTTGAGATTTTCATTGGTGCACCATCAAACATGCAGAT  
AAATGATCACTGGCAATATATAGCCTGATCTATGTGCGGCGGAATTTGCTTGATCTCTGTTCTAGCTCTTGTT  
CAATTCGATACAGATTGAAGCGATCCTCAAAGGTAATCAGGTTACAGCTAAACCAAGATGCCCAAATCTCC  
CTGAACGCCCAACCTGTGTAAATACGTCTCTGAGTTCTTCGGGAAATCAAATTTATAACGACATTGACTGC  
TTGAATATCAATCCCTCTAGTAAACAGATCAGTACAAACAAGGTTCCGGCAAGCACCATTGCGGAAGTCATG  
AAACACTCTGTTCTGTGATCTTGAAGCATCTTTCATGGATGTAGAAGCATGAATAGCCTAGCTCTGTAATC  
TTCTTGGCGAGAAGTTCCACACGTTTTACAGAGTTGCAAAAGATAATTGATTGATTGATTGAAAGCTTTGAGA  
ATAAAGTGTTGAGGCAGTGAAGCTTCTGCCTTTCTTCTACAAAAGCATAAACTGTGTTATACCCTTGAGAGT  
GAGTTCGTCCATAAGGTTGATAACATATGGCTTCTGCAGAAATCTATCTTTGAAGTCCTTGACTGTGACAGGG  
AATGTAGCAGAGAACATTAAAATTTGACGATTTGTTGGCAAGAAACGAATCAGCTGCACAATGGAAGGTTGG  
AACTCTGGAGAAAGAAGCTTATCAGCCTCATCCATGATAAGCATGGAGCAATCTTTCAAAACACATATTCCC  
TTTCTCGCAAGGTCAAGTATTCTTCCAGGAGTTCCAAGTAGTAAATGAACTGGTTGATAGAGTCTCATTATATC  
ATCCTTCAAGCTGGTACCCCAAGTGGTAACCATGACTTCAATTTTTAAGTGCTTCCCAAGTTCTTTACAAACCT  
GAGATGTTTGAAGAGCCAATTCTCGTGTGGGAACAAGAATAACAACCTGAATGGCATTGACGTCCTGATCAA  
TTTTTTCCAATGCCGAATGCAGAAAGCAGCAGTTTTCCAGTTCCATTTTTGGCCCTAGCCAGAATATCACTC  
CCAGTAAGAGCGATTGGGATACTTTCTTCTGATTGGAGATGGTCTCTCAAAACCTTCTCATAAATTCCCAT  
AAGCAATTCGCGCTTAAGAAAATAGTCTTCAAATTCATTTCCCTTAGTCGCTGTCACATCCTCTGTCTGTATC  
GAGTATCAGGTGCTGGTATGTTCAACCTCGCCTTCCAGTCTTGTGAACCTTTGGTCAAGTGCTTCAGATTGAACA  
GTCTTTTCAACCTCATCGATGGACGAATCAGATGCCGCCAACTGTTGGTTCCTTCTGAGCCATTGCTGCTGCTG  
TGTTATCTGTTGTTGTTGTTCTGATAATGCTGCTGCGGGTGCTGCTGCTGGTGATTCATCGGATTTCTCTGCAC  
ATACTGCTGCTGAGGGTTTCTTTGTTGAAAATTAGGGTTTTCGTTAGGGTTAGGGTACATGTTTCCGCCGCCAC  
GTCCTCCGCCACCGCCTCCCATTTCCCGGCGGCGGATATCTTCCCCCTCTCGGATTCATCGCCAATAAAGAAAA  
AAAACTAAGAATTATAACAAGCGTAAAATGAAGAGAAAATGAATTAGCAATATAACTTTATGAATCTGAA  
GAATCTGTGGTGAATTTGACGAAATTGTGAAGAAAATTTTAGTGAATTGGATGAAATTTTAGGGGAAATAATT  
GCAGGGATCGTGGGCCTAGG

>TCONS\_00032147

TGTAGTATGATCGTGCACCATTAAAGAACATAACCGAATTGATCTATCAGAGAAACCAGATTACTCACAATCC  
CTTTTGCAGTTTCATACATCTTGCTTGCTAACAAGCCCCTTATTATCCAGCAAGAATCCCAGTAATAAACCTCT  
CTGTAACGTGATCCTGCTATAAATAACTGGATTTTCAATGGAATCAAAGTATACAACCTCTGGT

>TCONS\_00032148

GCCGGGGTTCATTCCACATAGCATAGTATCGACTCAAACATATGGTTCGATCCCTGAGTATCTTGAATAGTCAC  
TTCATGTATTCCTGAATTCCAAAAATGATACTCCTTGAGCAATGCAGGAAGAGATCTTCTAACCAAGTCCAAA  
TCGCCTGTCCGGTTGTATTTCAACAATCATTGCAGACAGGAGAGGAGGCTGACTGAACGTGTGAAACACA  
AGATACGATAAGAATTTGTACAGCATGAAAAGATGAGCTAAGTAGT

>TCONS\_00032149

ATTTGCTAAAAAGGCTACGTCAAGTTCCATTTTCTCAGAAGGAGCGCATTTCAGATCAACTGGTAGAATTGATGTTG  
TACTAGTTGTTGTGAGATCAGGTTTCTTCCTCATCCATCTTGAACCTGAAATCCCATCCACTTTCTGCAGCTGAT  
GCCAAGTCGCGATAAAATTGTCTTTTCTCACAGATGTTTGGGAGTTTGAAGCTGTTTTACTGTCCTGAATTCC  
AAAAATGATACTCCTTGAGCAATGCAGGAAGAGATCTTCTAACCAAGTCCAAATCGCCTGTCCGGTTGTATA  
TTTCAACAATCATTGCAGACAGGAGAGGAGGCTGACTGAACGTGTGAAACACAAGATACGATAAGAATTG  
TACAGCATGAAAAGATGAGCTAAGTAGT

>TCONS\_00032150

TTACTAATTTTCGTCAGCTTGAATGGTTACTCTGCCTGCTCAGTAGCAGTCAATCTTCAAGTCTTCAGGCCATCC  
AAATTCCTCCAGAAGTGCCAGTACAACACCATTTCGCCCATCCAAAACCCGTTTGGGCTACATACACACCACC  
ACCTCCATATGCTCCCCATTTTGTACGTCGTATTTTTCATACATTGCACCGGTTTTCTTGTAAGCTACATAGTT  
TGTTTCGTATCCATCGGATAACAATGTCTTTAGCCAAGGCACTTGCCTCTTCTAGCCCAGACCTTGCGAGACCTT  
CAATGATCATGTGTTGAACGGGGGG

>TCONS\_00032171

GTAACATAGCATTGACAAGGCTAGGAAAGACATCAAGCACAGTTGCAGCAAAGTATGTCCAAACAGCACTC  
ACAGGTCTCGTAGCAACAGAAGCAGCAACACATTGCAAACAAACAAGCATAAATGCATCCTTTTTCTCGTG  
TCTGCGTTGCACATGTTCAACATAAGTCATCTCCTGATATGAGGGTGCCTCATTATTTTCTCGTTTGTCTAAG  
CTTATTGCACCTAAAGGCTTTTCAGAGTAAGTAATTTATATAATACTGAGAGAGCTTGAGTTGAGTGAACCAC  
TTTAATTCCTTGTATG

>TCONS\_00032191

CAAGATTACTAGCAAAAACTTGTGCTTTCTTAGCTTCTTGAACCCAATCAATCCTAGCAATAAACACCAACAA  
CAAAACCAAAACAAACAGCAACTCCAACCACAAATCCTGTCAACAATCCAGTAAGACCAAGATGAATCTTGA  
AAGCCAAAACCACACCTAATGGTAAAGCTAAGAGATAAAATCCACTAATATTAGCATACATTCTAGCCATG  
GCCTAGCCGTTCTCTGTACAATTCCTCCACAACTGCTAATGGAAAATTAACCACTTCAAGTAATGCCATTAA  
CAACATCATTTTCTTAACACCATTTTATAATCCCTTTATTATGACTAAACAATGGCCCCCAAATTCCTCTTGAG  
CTGCCATAACAGCACCACCAAGAAAACCCGAGCCAACGCTCATAGCTAACGATACATAGGCTGCGCGATAA  
GCAGGACCAGGACTATCTGCACCAAGCTCATTAGACACACGAATAGATGCACACGTTGATAACGAAAGCAT  
AACAGAAAACAACAATAATCAAAATTTAACACAATGGCTATAACTCCAATTGCTTGTTTAGCATTGTTGGTAG  
ATGTCCTGTAAACAAAACCAAGATTTTATAACACCACCATTCAAGACAAGTAGTAAGACAACATGGTCCACA  
TAATTTTCAAGTAGTCTGATCCAATCGCGAATTTCTTTGATCCCACCATCCTCCTTCTTTCCATTTTCTCCCTTTTA  
TTCTCTGCGAGAAATGCAGTTGTGATGGCTGTTTTTGCAAACCATGTGAAGTTCATAGCCATCAAAGGAAGTA  
GTATTCCTTTTTGCAATTTTAGCTCTGAAAGGGGATTTTGCATGAGGTTTGATGCTGGCCATTTTTGTGTTACAT  
TTTCTGGTGAAGGTGGCATATTTGGTGGTGGTA

>TCONS\_00032219

AACATACATATGCCCATACACATAATCATACAAATTATATAATCAATGAAACAAGCGAAAGATCGACGAAG  
AAACAAACCTCGATAGCACAAAGGGATTTTGAAGTAGTTGCAGCAATCACTAATCTCAGTAACAGTAGGGTTT  
TCACATGCTTTTGTACGCAAATTCTCCTTCCTTCAGCTAGTGTCTTCTTTGAATTTATATAAATTGGATACATT

ATGTTCCACTTCTTGATATTCTTAATTTCACTATCCATCTTTCTGATCTCTTGATAAAGGAGAGAATTGAAGATT  
GAAACTGTTGATCGGATCGAATGAGAACGGGGATTTCAGAAATTCGGTTTTG

>TCONS\_00032243

CAGATTACGTATCGCTTCCTGAAGGGTTAGATTTATCGCATTGTAAAAAAGAAAAGGTTCAAACGTTGGAG  
CTCTAGAGAAGTCGTTTCGGCATTGAGAATAGGAATATCGCCGACAAAATGGTAGCCCGCATGTTCTACGCTTT  
AGGTTTATCTTTTAATTTTGCCAAGTCTCCTTATTTTAGAAAGTATTCCGAGTTTTTGGCAAAGACTTCTATACC  
CGGTTATGTTCCGCCAACG

>TCONS\_00032253

GGGCGGGAAATCAATAGACACAGAAAGAGAAGAGCAAAAGGAGCAGAAGGCACTCCGTTTTTTATGTGAA  
ATCAAGGAGCAGCAGGTTAGACTTTGACACTTTCCCGAAGAGAGCTCAAAGCAATAAGATGAAAGATGGGA  
TGAGATGGTAGCCTTAGCGCAGAAGATAAATCATTGAACCTTAGGCCACTACCGAGCAGCAATGTAGGATCA  
TAACTGCCTGTACTGCCGAGATGATCCCTACTTGAAAAGGCGGAGACAGATTGTTGCGACAAATCGAGTTTC  
AAAAGCCCATTATCAATCACATTTTCAGGCACACCAGTCAAAGAGCCATCGGACCCATGAGAGTCCCATCT  
TTGACTAATATACACGGGCTTCTGAGAGGATGTCCTGTTTAAGCAGCAGCCAAGGCGCCAAGACCCGTTGTTT  
ACAAATCAGGTCAAAGCCCAATATAACGCATTTGGAGGGCATGGCGGTACAAGGAGCCAAGCCATCAGAA  
TCAGACCCGTAAAGGTCTCGTTTTTGACAATAAACATGGGCTTCTGAGAGGATTCTTTAATCAACCAAAACCT  
GCAACAGAGTCCTTAATTTCTACCACTTACAAGTGGAGAG

>TCONS\_00032378

GAGAAAGAACACAGCGAAGTTATCAATTTGCTTCGACTGCCGGCTGCAAGAGTATTATTATTTAGTCGTGAT  
AATGGAGCCTCGTGCAGATACTAACCTTGATACAGACATCTGGAGTCTGAATGATCAAGATAGCAATGCAAT  
TATATTGCCAGACAAGAAAAAGAAGAAGACAGAAAAGGAACAGGTATCGAAAAAGCTTAAAACGAA  
GAATAACATTAAGTTAAGTCAATCTCAAAAAAAAAAAGCTGAAGAACTCGAGGTAAGTGCATCCATGAATG  
TTCATTGTTTTCTTATTTTG

>TCONS\_00032441

CTTTCAGAAATTAGAAATAGATAGTTGGCAAAGACAACACTGGCAGATATGGCCGCTATATCCGACTTAGCA  
ATATAATTGCTTTCAACTTCAGCTAATAAAGGGAATTGTTTTATTATTGTTGATTAAAGCTTTTTAAGGAATA  
GCCAAGTTTATGCTCATATTAATGGTCATACCACAATGATTGATAAATTAAGTTTCAATGCTTCTGAAACTG  
CAAGGGTAAAATACATGTGGTTCACATTAAGAAGTTAGGCAGGGCAATCACAGAGACAACCTTCCTAGCATA  
ATCATATTAGTTCACGTCAAGCCATTAGGCAGGGCAATTAAAGACAAAATCTTCCCAATGTTACTATGTATCT  
GCCACAGGAAAGATGACACTCTAAGCCTTGACCAATTTGCAATATCCTCACCTCAACTCTAGTACTGAAAATT  
CCAGTTGGTGTGACCGACTTCTTTGGATCAAAAGCATCAAGGTAACCTTCCATTGATGCTCTTAACCGCGCAC  
AGTCAGGGTTATGTTGCAAGTACGATCTCAAATCTTGAAAGCACCTTTCCTCTAAAGTCATGGTTGCATAGAA  
ACTAGAATCTGATGGCAACAATTTTTGAAGAACTTGAAGCACTAATAACTGGGTGAAACCACGTAGTGTATG  
ATGGTGTGAGGTCAACAAAGGAATTATACAAGGCAGTAAAGCACTCAGATGCCTGGACTTGTACTCTTCAGT  
CGAGTGAAGGATGATATTTGCAGCTATAAACACATAGGAAGATAAAGCCTGAGGCCGCATATTGTAATCTCG  
CAGCAACGGTACTAATT

>TCONS\_00032447

ACCTGCTAGAATTAGGAGTGAGAGGGGGGAGGTGAAACGGGGTCAGAATTGGGATTGCGGAGACTTTCAAT  
CAAACCTCCTAGCTCCTTCCGAGCTGACTCTCTCCCGAACATGAACCCATACCAGCCAGAAACGGCAGAGAA  
TACACCTGAAATTGCAATTGTCTGAAGGAGAGTGAAGCTCTTCTTCTGCATTTTTATCGAACAGTATTAGATC  
AAACTTGCTTTTCTCTGTACGAGAGGTTCTG

>TCONS\_00032546

AAAAGAGATCAATTCCAATTGAACAAGACTTCCACATTTTGTGAAATGTGTTAGAATAATGTTATACACAAGT  
TCAGTAGAAGGAACGAATTGCAATGTCAATTGTCAAAGCTCATAATACAGATTTTATAGACAACTCTATCATCA  
CGCAATATAGTACATGGGATTTGGAAGTTTAAAGGACCTTTTGGCAACAGCGAAACCGTTCAAGTCACTCCA  
CTGATCTCCAGAGCTCCCATGAATCCTGTAACCTTCATCTTCTAACTCCTTTCTTTTCTCAGATTTATACTGGGT  
TGCCAGTTTACCATTATCGGAAGGTCCCTCAAATAAGTCTTTCCCAATTGCTGTATCCAGCATACACCATA  
TTCTTTTCTGTATAATTCTTTGAAATTCCTCCGACCAGTCAACAAGAATATCTTAAATCCTCGCTGTTGTAG  
CTCCTTGTACAGTTTTAACTTGCAGGAATAGCAGGAGCTTCTGCTTCATTTACCCATTTGTCAAAGGCGACTT  
CATCAAAGATCTCCGATC

>TCONS\_00032715

ATATATGTAACCTCAACAATACGTGCAAGATTGAGAATACGAGATAAAAACTCCGTAGAGACGGGAGTGGG  
CCTAAGAAGTCCTTCATTAAGATCCTTCCATGCTGCCTCAGCCATTTCTTGAAATTTAGTCATTGCCTCTTCTGT  
TGATATGCCATAATCTCTCATGCAGCACTCAATTCCTGTTGCAATTTGTCCCCTACTTTTCTCAACCTCGTATGT  
GGCTGTGTCATCAATAACTCGACATATTATCACACTAGCTTCAAGAATTTTAGGATTCTTTGACAACCACTCA  
AAATCCTGCTCCGTAACAGACTTCATGCCCAAATACGATGTTGTGCGGAGGTAGTAATATGTAGTAGTTGCTA  
GTGCATTGCTTAGGTATTAGAAACAGGTGGCATATATCCTTCAATAAACCATGTTGACTCGACATTATAATT  
TCTTACTACTTCTTTCATCCTTTCTATTGCATGGCACACAATATGAGATCTTCCAGCACTAGACAATTCCTTTTC  
ATAATCATTGTAAAGATCTAGAATAGCTTTATAACTGATTTTCATGTAATCAGGA

>TCONS\_00032716

ATATATGTAACCTCAACAATACGTGCAAGATTGAGAATACGAGATAAAAACTCCGTAGAGACGGGAGTGGG  
CCTAAGAAGTCCTTCATTAAGATCCTTCCATGCTGCCTCAGCCATTTCTTGAAATTTAGTCATTGCCTCTTCTGT  
TGATATGCCATAATCTCTCATGCAGCACTCAATTCCTGTTGCAATTTGTCCCCTACTTTTCTCAACCTCGTATGT  
GGCTGTGTCATCAATAACTCGACATATTATCACACTAGCTTCAAGAATTTTAGGATTCTTTGACAACCACTCA  
AAATCCTGCTCCGTAACAGACTTCATGCCCAAATACGATGTTGTGCGGAGGTAGTAATATGTAGTAGTTGCTA  
GTGCATTGCTTAGGTATTAGAAACAGGTGGCTTATATCCTTCAATAAACCATGTTGACTCGACATTATAATTT  
CTTACTACTTCTTTCATCCTTTCTATTGCATGGCACACAATATGAGATCTTCCAGCACTAGACAATTCCTTTTCA  
TAATCATTGTAAAGATCTAGAATAGCTTTATAACTGATTTTCATGTAATCAGGA

>TCONS\_00032718

GATCTAGAATAGCTTTATAACTAATTTTCATGTAATCAGGAAGGCGATCAATTTGTTGATATCCCATCTTTGT  
ATGGCATCTGTGTATGCCTCAAGTTCTTTAACTGTACCATAAGCATCAAAGGTGTCATCCACAATCGAAATCA  
TTGATATGGTCTTAACAAGCATGACGCGAGCTTGAGAGTATTGAGGCTCAAATAAACTCCTAATGCCCAA  
AGTAGCATTCAACTACTCGATCTCTAGCATATGGAAGTGTTGTTACGAAATTCAAATCTTCCACCACCTGCA  
GCATAACAAATCAACATCAGTACTTGATATATGGTCAATCAAAAAGGGTTCATCGTTTTAATTTATCGCACCT  
TGATACTTCAGCAAGTTCTTGTTTGTGCAACATCTGGAGCAAGTTGAAATCCAATTTGGCAAATTGAAGTAAC  
ACATCATTTTTTTGATTGTTCTTCTCATAGATTCATGAGATGAAGAATCGGGTCTCGACTCTAGGTACGCCCTT  
GTGCAAACATTGCTCAAGGGCATGTGTCACTTGCTCCCTTAGTGAGATTTCAAATGTGGAAGTGCAGATTCA  
AGATGGATAGTGGAGAAAGCAAGTGCGTTTTCTAAGATATCGTCAGCATGAGTCCTCACATGTGAAGCTTCA  
TACAAGTTCAATAATCCTAAGACATCGCTAGAAAGAGACTCTTTGAATTTGCCATTTTCATCTTGGAATTTGCT  
GAAAATTTGAGGAGAGATGTTGAAACCATGTTGCCTGAGCAATCGAAATTGAAGTGAAGAAGTGCTCAAATC  
ATCGCAGTTTGAGTTTTGGTTATAAATTTGATCCAAAATCTCATCAATTTCTTTTTCAAAGTGGTAGGAGATGC  
CAAGACGTTCAATAATGTCAATCAAATTCATGTATCAGCCAATTTTCATTGCAGTTGCT

>TCONS\_00032744



TTTAGGCAAGGATGATGAGAAGTAAAATCTCATAGAAAATTAAAACCCACAGAAAGGAAGAATCAGAAG  
GGAGCTTGAAAAACGTGCTCCTAAACTGGTTGAAACTGGGAAAAAGACATTGATATTACATGGTACAAAA  
CAAGCCAAGTGTGAATGAGGTGATGACTGAAATTTACCATTGAAGAGGGATAATTCTGATGAATATACCC  
>TCONS\_00032770

CCCAACATGTTCAATGTTCCCATCACATTTGATATGATGGTCTTGACAGGATTATACTTGTAAATGAACAGGAG  
AAGCAGGGCAAGCCAAATGATAAATCTGATCAACTTCAAGCAAAATTGGCTCCACCACATCATGTCTAACCA  
TCTCGAATTTAGGGTTTCTGAAATGGTGCAACAAATTCTCCTTCCGACCAGTGAAGAAATTATCAACCACAAT  
CACACTATCCCCTCTCTCTATCAACCTATCCACCAAATGGCTCCCAACAAAACCAGCTCCACCTGTTACCAAT  
ACTCTCAACTTCTTTTTCTTCAATCCTAATGGCACCTTCCACCTGCAACACATTAAATTAAACCAA  
>TCONS\_00032771

CTCAACTCAAGTCTGATTCACTCCTTGTGCGGATGAGGGGCTGGCGGTCGGAGGAACCTGGCAACACGTTCTG  
CTTTGGCCCCCTGATTTATGGTCATAGTACTCGACGACTGCAGCGCCCCGCTAACGCAGCAAGAGTCAGGGCTTG  
TGCATGCAGCCTGGCATGAATAATCTTAACGCTGGTTTTTCATGTTGGGTTGCGACCAATTGTAAGCAATTGAA  
CCCGTTATTCCACTCAGCCATAAGCACCCAACTGTTTCGGAGCTTGTGTTCCACCACCCATTCCCTCACCGATT  
CAACGTGTTCTTCTTTCTGCCATTCTTCTGCCTATGCAAATAAATAAATTGACTGT  
>TCONS\_00032964

CCTGTTCTGTGCCTCTGGGATCTGCCAAGAACAAACCAGAGATGCAGCAACAGTTACTTTTCAACTTAAAAGT  
TTCAATGCCTGTACACTAAAAGCAACCCAAGAACACAGAAATCTGAATGAATACCAGAAGCCTGATTAGCA  
GCTGTGATTGTCAAAACCAACTCAGCTGCTTCATTTTCTCTACCCCCATTTCCTTTCTTGCTCTCA  
>TCONS\_00033037

GATAATGTATAAATCAAACATGGGCAAAGAACAAGATGCAAAATTTTGAGATCGTCACAACAAAACCTCAGC  
TTAAACAATGTGAAGCTCTAAAGACTATCACCATATAATTCAGAAGGATGAAACGAGTCTATGCTCCAGGAA  
CCTCGGGTTCTGCCTCTGCTACTGTCTCATCAGCTGGCCGATCCAACCTTCACACCAACATCTTCTGAATAATCA  
CCATGAACCTCCATCAGCTTGCCAATATCAAACCTTGGGGGCCTTGAGGATCTTGACTTTTCGGATATAAACAT  
TTTGTAGGGGGAAGATGCTTGAAGTTGCTTTCTCAATCTCTCTGCCAATTGATTCAGGGATGAATTTGGCAACC  
AACT  
>TCONS\_00033038

ACTACCAACCTGACGGATCTGGCTGCTCTGAGCATAACAGGTACGCTTCTGCTGGTTTGGACGTTTCTTTGTAA  
AAGCAATGCAGAACATCCTCAGGGTATAGCTGTCTGGTAGTCTTGACATCCACATGGGCCTCAATCAAAGTTT  
GCCATTTGCGAACCAGTGACCTCAACTTGTCTGTTGTGAAATCCATTCCCCAGAAGTTTGTGAGGACATTCTTT  
CCTTGCACATCCTCTGCTCTCA  
>TCONS\_00033050

AAAGATTCTTACCTCTGCCAGGCTGAATGTATGAGAAATGTTGATTGTAATCAAACCCTTAGACAACCAGGAT  
AGGAGCTCTTTCAGAGAATCTCCAAGCACATTAGGTTGATATATCTTATGGCTTCCCCAATAGAGTCCGTGAA  
TCGTCCAGTTCTGATGGAAAAAAAAGTATAAAAAATGATGGTTATTACTCTCGGATAAAAGAAAATGAATAA  
GCTTT  
>TCONS\_00033099

CGCTAATACAAAGAACATCAGATGAGAAGCTTTTCTGAACTTCCACAGCTAGCTCTTCCAAACTCAGTTGGCA  
CTCCAGTCCTATCTTGATGACAAAGGAGTATAGAACAGTATCCTGCATGCTGCTGATGTTGAGATGAAGAATC  
TCAAAGGAGAGTTTCTCTAACACATTAATTATCTTCACAACTTGACCTGGAATCCTCTTAGAAATGGTTCTCA  
ATATAACATTGGATCCTGATATCTTTGCTTCAACATCAGCCACTGGAGAATTACAACATGCTCCAAGTTCCTT  
GAATAGGTTATTATTATTAGGACTAAATGGACTTTCAGGTGTGGGACTTAGTTGCAAAATTGGCCTTGGACTA

GGACCAGGGCTAGGGCTTAAACTCTTTCGTCGCTTTTTTCGCCTCCAGAGATTGTAGAACTAGGTGTAATTCTTT  
GATGAATTCAATTACTCCTGCTATTATTGATGCTTGAT

>TCONS\_00033121

GTGATGGTGAAGGCCAGGCAATACCAGAATCTTTGTTGGTGGCTTTCTATTAGGAGGAGTAATCATTGGTGC  
ACTTGGTTGTATCTATGCGCCTCAGGTAAAAGTGCAGTAGCACTTGTATTGGGCACCGCCTTTGGTCTTCTTTG  
CTCTAAAAATACTTGTGAATGTTGCTTCATCACTTCTTGATATAAAGACGACCAAAGGCGATGACCTTTTCCGT  
ATTGGTCACCGTCCTTGGTCGCTTTTGCTCTAAATGCCTTTTCCGAATTTCTTCTCTTGTGCTGTACGTGGGAGG  
GGTAAGATGACTGCCCTTTAATTTCTCTTTTACAGATTAGCAAGGCATTAGCTGAAACAGATAAGAAGGACCT  
CATGAGAAAAATTGCCCAAATTTATATATGATGAAGAAAAAGCATTGGAGAAACAGCGCAAGATACTAACGG  
AGAAGATTGTCCAGCTGAATGACGCTATTGATGACATTTCCAACCAGTTGAGGTCAGGAGACACACAAAATG  
GAGTTGCTGTGAACCTAGATGAAGTTGAAACAATTATATAAGAACACTTCTATT

>TCONS\_00033162

GGAAGTGTAGGAGTTTTGTTTTACATTACTATCTTAGACCAAGTATGCTTGCTGGTTTCATACTGGAGGAAAGG  
CGCTACTCTTCATCCACCACAACACTGATCTCACCTTTCTCAAGCATATCATAAAATTCCTTGGTCCTCCTCTG  
GTTATTCCAGTGGTGCATCTTCCACAAGCCTCCCGCGGCGATGCCAAGTGAATCCCAATCAGTATTTCTTC  
ACCACACTTGAGCCCTTGTATGCAGCATGGGCAATATGAGAACCTGCCATTTTTCATACCTCGGGAGAATCGG  
TGACGGACAAAAACCAGCGAGAATTGAGCAGACGGAATTGGGAGAGGTATAAAAACTGGGTAGTATCCTCG  
TTTCTAGAAGCTACTGTTAGGGGAAAGATTTTCGTGCGACGTGTCACACACTATTTAATCTGGTCCGCATGAGA  
CTTAAAGAATCACTTGAGAGATTAGTATATCGCAATTGCTCGTATTTACTAGTGAGT

>TCONS\_00033191

ATTTGACTTTTCATTATTTTTATTTTCGTTTTTTTTTATTGGAGTAGTGTGACTATGTTACTATTGACAGATTTCAAT  
GCCATAAGACGTATCAATAGTTTTCTATTCTAAATAGAAAGAAAGTCAAATTTGTCTAAATACTAGACATAAG  
GAAGCAGGGGATAAATGTGGGGAACAAAAAATTCTAGGAGGGATTATTTGTCTTCCTAGTCTTCGACACAAG  
AAAGGGGTGTAGAAAAATCCTTTTTTCTTGTGTGCGAAACGAAAGAGTAATGATTCTTGACCCTGTTTGTTAAA  
AATTCCTAGTCTTGGTTTCGATTTTTCCAGATGTATCAGAAACCCTTTACGTATAATATACTAAGCGGTGGACA  
AACAAAACAAAAAAGAGAGGAAATTTTATTAATTAATAAACTTCTTCAATCAACTTATCTTATACAAAA  
TTTGATGATGAAATATGAAAACAATAAAAAATAAATAGAGTAATGTAATAGAGAGAGTAAGGTTCTACATTA  
GATTAGTATAGAAAGGATTTGCACGATATCTAATATATTATAGCAGCCAAGAAATTGAGTGATTCCTTCTTTC  
TTCCAACCTTTGAAAGTACCGATAGATACTATCATAGAAAAAGAAGAGGTGGTCGGAATAGTGAATTTTTCAA  
AAACATGATCAGAAAAATGAGAAAAATGGAGTTTTTGAAAAAGAAAAAGAAATCCATTTTATCATTTAGACG  
AAAAAAATATTATGATTCTTAAGAACTCAACGGGCCCTTCCCCTTCGAATCAAACAAACAAAGAAGGGAATC  
CCGTTGAGTTCTTACGCTTTCATGTTGACGACTCAATTCATTTCGATTACTACAGGGATGAACCCAATCCGGAAT  
ATGAACCATAAAAGAAAATACCTATTAACCGATTACAAGAATACCAGCTACAGTACCTATTATCCAAAGA  
GGAATCCTTCCAGTAGTATCGGCCATTTACCCCACTTCCCTCCAGATTTTCATCAAGTGGTCATGCTAGAGACA  
TAAACAGTCATGGATAATTAATTTATGAGATCCTTCCGAATGAGCTAAGAGAATCTTATTTATTCTCTTTCGTT  
TTCTTAATTGAAGAAATAATTGGAAAATAAAACAGCAAGTACAAAAATGAGTAATAACCCCCAGTAGAGAC  
TGGTACGATTCAATTCAACATTTTGTTCGTTCCGGTTTGATTGTGTCGTAGCTCTATAATTCCGATTAAAGTTTAT  
CGTTGGATGAACTGCATTGCTGATATTGATCCCAAAAAAAGACGGTAGGTACAGCTAGGCCGTGAACAGCC  
AACCATCGTACTGTAAAAATTGGATAGGTTTCGATCTATAGTCATTAGGGCCTCCTAAAACGATCTACTAAATT  
CATCGAGTTGTTCCAAAGGATCAAAACGGCCAGTTATTAATGGAATTCCTTGTCCGGCTCTCTGTAAAATACTC  
GTTTGGCCGAGGGCTTCCAAACACATCGTAAGCTAAACCGGTGCTGACAAATAACCAACCCGCAATGAATAG  
GGAAGGTATAGTAATGCTATGAATGACCCAGTATCGAATACTGGTAATAATATCAGCAAACGAACGTTCTCC

TGTGCTTCCAGACATGCTGAGCTCCACATATTCTTGTACAGTCAAAGAAGATCGATTCCGTAAAAGATGAGAT  
CAGTAAATGACAATTCACCTGAAATTTTCATCTTTGTGAGATCGTCAATATTGTACCGAGGGCGTCTTTAGAGTA  
TACC

>TCONS\_00033258

CAGATATTAAGACAATTTGGTACAAATTTGGCATTGTATCACTTCATCTTTTCTTCTTGAACAAAACATG  
ACGATTCACACGAGGATCAAACCTTTCTGAATTCAAGTTTCGTCTGAGTCGTTTGAAGCTTTTGGTCTTCTTCTT  
TACATAGAAAAACCCAGTTCCAGCAGCTGAAACGAGCCTCACGAATAGAGCTCCCGCCTTCTTCTTATCACC  
CATTAGCTTATC

>TCONS\_00033277

ACATCAAGTTGATACAATGAGCCGCACATGGAGTCCAATAGACATTCTTGTACGCTCCTTCAATCATGCCACC  
CATTTTCACATTTTCACTTGCATTATCAGTGACCACTTGAACAACCTTTGCTTGGACCAATCTTTTCGATGGTGT  
CTGAAACAAGGTGAACATTTTGATGTGGTTCGGTGGATGAGTCGCTAGCATCAGTAGACTCAAGAAACAACT  
TCCCCAGGGAGAATTCACCAACACATTAATAATCATTTTCCCCGTTCTTGTCTGCTCCACTTATCCATCATAATGG  
AGCAGCCGTAAGTTGTTCCACACAACCTTTATGCTCCTAAACAATTTTATTAGTCTCCTCCACTTCCTTATTTAGAT  
AAGGACCTCTTATTTTCATGGTAAGTGGGAGGCTTCATT

>TCONS\_00033278

ACATCAAGTTGATACAATGAGCCGCACATGGAGTCCAATAGACATTCTTGTACGCTCCTTCAATCATGCCACC  
CATTTTCACATTTTCACTTGCATTATCAGTGACCACTTGAACAACCTTTGCTTGGACCAATCTTTTCGATGGTGT  
CTGAAACAAGGTGAACATTTTGATGTGGTTCGGTGGATGAGTCGCTAGCATCAGTAGACTCAAGAAACAACT  
TCCCCAGGGAGAATTCACCAACACATTAATAATCATTTTCCCCGTTCTTGTCTGCTCCACTTATCCATCATAATGG  
AGCAGCCGTAAGTTGTTCCACACAACCTTTATGCTCCTAAACAATTTTATTATCTCCTCCACTTCCTTATTTAGATA  
AGGACCTCTTATTTTCATGGTAAGTGGGAGGCTTCATT

>TCONS\_00033286

AGAAGTGACAGAGCTAAGAATCTTTTCTTGCTTCTGCATCCTGATGTCTCCACGGATTGAGAGCATCTCTGAC  
AGCCTTGGCTTCCGGAGAATTTTCCCAGGCTCTCTTTTCTGCCTCTAGAACAGTCACCTTATCATAAAAGCCAG  
TTTTGATCATGAACAACCTCCATGGAACCTCCAATCATGGCGGAAACAACCTGAAATTTTCAAATACCAATCCC  
AGAATTTTCATTGCAATCCTTCTAATACAGCTCCAATTCCTGCAAATCAAACAGAAT

>TCONS\_00033338

ACCCTGGCTTTCTTTGGTGCGTAGAAAAGGTAGAAACCGACGTAGATAGTTTCAATGAAGCAGCCAAAGGAG  
TTTATGGTGATGATAAGGGTCGTGTTTGTCTTGAGAAATGCATAATAAATCCAAAGCATGGAACATAAGAGA  
GCAACCACATATGGAATCGATTGATAGCCTTCAGTTGATTTTTTCTTGTAATTTTATAAAATGTGGGCAGTGG  
AGAAAGGAACACAATGAACGAGACGATGTTACCAAGGACACCAAAAAGCAAAAGCCCAGTGACCAGAAAT

>TCONS\_00033367

TGCTTGTTGGGTATTTTGGTTTGACACTGCTTCACACCCCCCAAAAAAAGAAGGGAGCTACGTCTGAGTTAA  
ACTTGAGATGGAAGTCTTCTTTCTTCTCGACGGTGAAGTAAGACCAAGCTCATGAGCTTATTATCCTAGGT  
CGGAACAAGTTGATAGGACCCCTTTTTTACGTCCCCATGGAGCTACGTCTGAGTTAACTTGGAGATGGAAG  
TCTTCTTCTTCTTCTCGACGGTGAAGTAAGACCAAGCTCATGAGCTTATTATCCTAGGTGCGAACAAGTTGATA  
GGACCCCTTTTTTACGTCCCCATGTTCCCCCGTGTGGCGACATGGGGGCGAAAAAAGGAAAGAGATGGAT  
GGGGTTTCTCTCGCTTTTGGCATAGCGGGCCCCCAGTGGGAGGCTCGC

>TCONS\_00033368

TGCTTGTTGGGTATTTTGGTTTGACACTGCTTCACACCCCCCAAAAAAAGAAGGGAGCTACGTCTGAGTTAA  
ACTTGAGATGGAAGTCTTCTTTCTTCTCGACGGTGAAGTAAGACCAAGCTCATGAGCTTATTATCCTAGGT

CGGAACAAGTTGATAGGACCCCCCTTTTTACGTCCCCATGTTCCCCCGTGTGGCGACATGGGGGCGAAAA  
AAGGAAAGAGATGGATGGGGTTTCTCTCGCTTTTGGCATAGCGGGCCCCCAGTGGGAGGCTCGC

>TCONS\_00033372

GGCAGGTTTAGCGGGGGCGGCAGCAAGCTTGAAAGAGCCCTTGATTTTAGAGAGCTTCCAGAAGCAACAA  
GCTTCTTCAACTGAACTAAAAGTAATTTCTGAAATTTGAAGGCAAATCCTTTTGCTTTTCCTCAATGAATTC  
GCTATCGCAACTTGACTTGAACCAAGTTCTCTCCTTTAACGCCGCTATTGCTTCTGATATCATCTCAGCATAAGG  
AGGATGAGATCTGGGTTTCTTAGGAGCAGAAGTTTTCTTTGCAGCTGTAGACGCCATTGTAGAA

>TCONS\_00033447

ATGACGAGCGCAAGAATGTTTAAATGAGTAAGGAGAAATTCTTTCCTGCGAGTAACTCCCACCGTCGGTATG  
AAGCAGCTTCCCTGCATCTTCTTCCATATGCACCCTGGTAACGCCAAACTTTCTATGGCCACCACCAAACCTCA  
ACTGGAAGATCCACATCAAGATATCCGCCACTCGCAATTGGGATATCAAACCTGTGATATTTGATACCCTTTTG  
GAAGGTCAGGATAAAAAATACTGCTTCCTATCAAACCTGGAACCTCAAAGACAATTTACAATTAAGTGCAAGGC  
CAACTCTTACTGCACACTCAATCACCTTTGAGTTCAAACCCGCAATGCACCAGGCAAACCCATACAAACAG  
GACAAACACTGGTATTTGGTGGAGAACCATAGTTGTAAGGGCAGCTACAAAAGGCCTTAGTAAGAGTAGAA  
AGTTGAACATGTGTTTCTATGCCTATAACTGCCTCATAATCTTTCAGAATCTTATCAACTGTTTTTGATTGGTTT  
TGTGTGGAAACTTTCAACTGGGCTGTTCTTTTTCTTGGGTTGCAGTTTGTGTTTGTGCACTTCTCATACAACAA  
TACAAAACACCATGTTTTCTTGCAAAATATGAAGATGGGTATAACATAGAAGGGTTAAGCTGTATCCCTCTAA  
GGAATGTCAAAGCCATCTTACCAATAAACACACAAAATTATCTTACCAATAAACACACAAAATTATGCCCAA  
GTTTTATTTTTTGGTCAAAAAGCTTCAGTGACTGATGAGAGTCACATATACGACATCTTTTGAGGAGGGTCCA  
AGATTTTACCCTGTGAAGCTGTGAGATATT

>TCONS\_00033488

CAGAGGCTAGTAATGTAGAAACAAAGGTCCTGTTTCCTTCTTCTTGTGTCAGCATCAGGGATGCTCCTATAGATA  
CACAAGTTGTTAGACATTTCCCAGCTCCAATCCTCCTTGTAAACATACATAGGTGGCCAAACGGTTAATCCT  
CACATAGTGTTGTCGATTTTTCCCATCCGCAAGCAAGCTAGTTACTATGGAGTAGCAAGACTCATGACCACCC  
CATACCTTGTCTCTGGTTCAGCAGTCTGACTTCCATCTGGAAGGAAATAACGGCGTAAAGGAGGTCCTGTTC  
CGTTCAGTAGGGGTCGAGCATTCCGCCAATATCCGGAGCATCCTCGGTGAAATGGAACCTCCCACGCATGAT  
CACATAAATCCTCCTTTGTTACTCGCTTACGTTACCATCCATTACCGACAATGAGTAAGCAGCCAACCTTTGA  
AAATCTAATCATTTTTGCTACCCGAGGTAAATGTGCTTTGTCATGCCATAATTCTTCACACTTTGAGCTCCAAA  
TCTTATCAGAAGAAGCAACAGCACACCAACCACGTGACACAAGGAGAGAAAGTGCCACGCTGCGCGCGTCA  
AGACAGCTTAAAATCGTCAACATTATATCTGAACCAAGTAAAATTAGTGGATCTCTCATCAAATTATCACCTT  
TTTCTTCACTAATTATTCTCTGCTGATTCTCTCTCCTTCTTCTTTTTCACTTTTTCTTCAACTCCATCCTCAAAA  
ATTCCACCTTTATCATCAGAAGAGCATAACCCATCTTCAAAA

>TCONS\_00033489

ATTTTGAGCAGTGGAAGAAATGACGAAAGAAAGTAACCATTTTAATTTCTTACCAACCACTTGCAAAGCTA  
GATCATAAAAAATTGGACGTTTGGACAGCAGTTGCACAGATTTAAGTGTTCTCAAGCACGTACAAGTTCTACT  
AACTCATTTGGTGCGAGCTGCAGCCATGCATGACATATATGGGGTTGGATAATGCCTCGGTGAAATGGAAC  
CCCACGCATGATCATAAATCCTCCTTTGTTACTCGCTTACGTTACCATCCATTACCGACAATGAGTAAGC  
AGCCAACCTTTGAAAATCTAATCATTTTTGCTACCCGAGGTAAATGTGCTTTGTCAT

>TCONS\_00033643

AAAAAATAAAAACGCTTTGTGCAGATGCTCATCATTTGCCATTTTTCTTAGATGAACTGATACAGCGACAAAC  
TCCGCGTAATTTAAATATCCATCTCTATCAACATCAGCGGCTTCATGAGAATCTGAAGATCAGCATCAGGAA

TCTGATGGCCCAGCTTTTGAAGACCAATTTTAAGTTCTCCAAGGTTAATCTTGCCTTTCTTTCCTGTATCCATCT  
GGTCAAATGCTTCCTTCATTCCAGCCACTTCCTCTGCTGACAAAACTCCGCGAT

>TCONS\_00033754

TTTAGCACTGCATATCCTTCCTGTTGCACTAAAATGAATTTCCATCAACTTTCCAAATCGACTAGAGTTGTTGT  
TCTTAGAAGTTTTGGCATTCCCAAAGGCCTCCAGTATGTAGCTTGTTTGCAGCACCTCGCTCTCTATTCCACTA  
CGGCCTCCACCAATCATAGCCAAGTATTCCATTGCAATCTTTGCTGTTTCCGTCTTCCCAGATCCACTTTCCC

>TCONS\_00033875

TCATCTCCTCAAGAATCCCATTGCCTGGTAGACATTATTGACAGTAACATCTGCTACATCTGCTGCTTTTCTGG  
CTCCCTCTGCCAAGACTCCATCCAAGTAACTTGTGTCTGATACAATTTCCCTCATAGCGTACCTGGATAGGGTGT  
AGATGATCAACTAAAGCATCTGTAAGCACGAGTTTGAACGTTCCCCAATTCATATCTCTGCATTCTTCTGCAA  
CCTCCTGCTTGGTCTTGCCTGTAAGTGTGATAAATAGAAAGAAGATTGTTACATTCAGGTCTTTCCGGATTG  
TCAAACCTCCATGCCAGGAAACGAATCAGTCTTGACACGTTTTATTTTATTTGCTATTACATCTTTTGAATCTAG  
CAAATTGATTCTCGACTGATCAGATGGTGCTGACTTCGACATCTTGGAAGACCATCAGTAAGGGACATGATT  
CGAGCCCCAGCGGGTGAATAAGGGGTTTCAAGAACCTTGAAGATTGAACCGCCTCTCCCTCCCAGTTTCTTCC  
ACTTCCTTCCTCCATATAAATAGTTAACACGCTCAGCCAGCTCTCGTGTCAACTCCAGGTGTTGCTTCTGATCC  
TCTCCGACAGGGACAAAATCAGACTGCCGAAGGATACTTTGATACATCAGATCCACACATATTCACACACTT  
TCAAGATTAGAGTTGGCGGAAAATTGTGCTGGGAACTGCAGTGGCATTGAGCAAGCTGGTACAGAAGAATA  
TCAGCAGCCATTAGCACAGGATAGGTTAGAAGGGCAACACCCACATTTTCATCCCCCGCCTTCCGTGATTTCT  
CTTTAAATTGAATCATCCTGTTGAGCCAACCAATAGGTGTTGCAGAACTCAAAAGCCACATCAACTCTACATG  
AGCACGGACATGAGACTGCACAAAGACTGAAGCCTTAGAAGGATCCACACCACATGCTAAATAAATAGCAG  
CTGTATCCCTTGTTGACCTTGGCAATTGTTGTGCTTCATATGGCAAAGTTATCGCATGAAGGTCCACAATGAA  
AAAGAATGTCTCATATGTATCCTGCAAGCGTATCCAGTTCTTTATGGCACCAAGATAATTTCCCAGATGTATC  
AATCCTGTAGGCTGAACACCAGAGACTATTCTCTTCTTACAGGGCTTGAAGAAGACTCAGAATTAACAGGT  
CAGAGACAGCTACATTGCAAAGGCACCGGAAATCTCGACCGGCTTGTAATTACGTTGACGAATTAGCTGTG  
ATCTTCTCAAGTATTTACCTGAACTTAATCCGCGTAACCTGGTGGAAAGAGGCGAAGCGAGGAGCAGAATAAG  
TGACCATACTGAAATGAGAGAGTAGAGAACGGCCCATTTGCTGCTGCTTTTTTAAGGTCTGCGAGTTGGAACG  
CAGTTTGGATGAGATGGTG

>TCONS\_00033876

TCATCTCCTCAAGAATCCCATTGCCTGGTAGACATTATTGACAGTAACATCTGCTACATCTGCTGCTTTTCTGG  
CTCCCTCTGCCAAGACTCCATCCAAGTAACTTGTGTCTGATACAATTTCCCTCATAGCGTACCTGGATAGGGTGT  
AGATGATCAACTAAAGCATCTGTAAGCACGAGTTTGAACGTTCCCCAATTCATATCTCTGCATTCTTCTGCAA  
CCTCCTGCTTGGTCTTGCCTGTAAGTGTGATAAATAGAAAGAAGATTGTTACATTCAGGTCTTTCCGGATTG  
TCAAACCTCCATGCCAGGAAACGAATCAGTCTTGACACGTTTTATTTTATTTGCTATTACATCTTTTGAATCTAG  
CAAATTGATTCTCGACTGATCAGATGGTGCTGACTTCGACATCTTGGAAGACCATCAGTAAGGGACATGATT  
CGAGCCCCAGCGGGTGAATAAGGGGTTTCAAGAACCTTGAAGATTGAACCGCCTCTCCCTCCCAGTTTCTTCC  
ACTTCCTTCCTCCATATAAATAGTTAACACGCTCAGCCAGCTCTCGTGTCAACTCCAGGTGTTGCTTCTGATCC  
TCTCCGACAGGGACAAAATCAGACTGGTACAGAAGAATATCAGCAGCCATTAGCACAGGATAGGTTAGAAG  
GGCAACACCCACATTTTCATCCCCCGCCTTCCGTGATTTCTCTTTAAATTGAATCATCCTGTTGAGCCAACCA  
TAGGTGTTGCAGAACTCAAAAGCCACATCAACTCTACATGAGCACGGACATGAGACTGCACAAAGACTGAA  
GCCTTAGAAGGATCCACACCACATGCTAAATAAATAGCAGCTGTATCCCTTGTTGACCTTGGCAATTGTTGTG  
CTTCATATGGCAAAGTTATCGCATGAAGGTCCACAATGAAAAAGAATGTCTCATATGTATCCTGCAAGCGTAT  
CCAGTTCTTTATGGCACCAAGATAATTTCCCAGATGTATCAATCCTGTAGGCTGAACACCAGAGACTATTCTC

TTCTTTACAGGGCTTGAAGAAGACTCAGAATTAACAGGTTTCAGAGACAGCTACATTGCAAAGGCACCGGAAA  
TCTCGACCGGCTTGTA AATTACGTTGACGAATTAGCTGTGATCTTCTCAAGTATTTACCTGAACTTAATCCGCG  
TAACCTGGTGGAAGAGGCGAAGCGAGGAGCAGAATAAGTGACCATACTGAAATGAGAGAGTAGAGAACGG  
CCCATTGCTGCTGCTTTTTTAAGGTCTGCGAGTTGGAACGCAGTTTGGATGAGATGGTG

>TCONS\_00033877

TCATCTCCTCAAGAATCCCATTGCCTGGTAGACATTATTGACAGTAACATCTGCTACATCTGCTGCTTTTCTGG  
CTCCCTCTGCCAAGACTCCATCCAAGTAACCTTGTGTCTGATACAATTTCTCATAGCGTACCTGGATAGGGTGT  
AGATGATCAACTAAAGCATCTGTAAGCACGAGTTTGAACGTTCCCCAATTCATATCTCTGCATTCTTCTGCAA  
CCTCCTGCTTGGTCTTGCCTGTAAGTGTGATAAATAGAAAGAAGATTGTTACATTCAGGTCTTTCCGGATTG  
TCAAACCTCCATGCCAGGAAACGAATCAGTCTTGACACGTTTTATTTTATTTGCTATTACATCTTTGAATCTAG  
CAAATTGATTCTCGACTGATCAGATGGTGCTGACTTCGACATCTTGGAAGACCATCAGTAAGGGACATGATT  
CGAGCCCCAGCGGGTGAATAAGGGGTTTCAGGAACCTTGAAGATTGAACCGCCTCTCCCTCCCAGTTTCTTCC  
ACTTCCTTCCCTCCATATAAATAGTTAACACGCTCAGCCAGCTCTCGTGTCAACTCCAGGTGTTGCTTCTGATCC  
TCTCCGACAGGGACAAAATCAGACTGGTACAGAAGAATATCAGCAGCCATTAGCACAGGATAGGTTAGAAG  
GGCAACACCCACATTTTCATCCCCCGCCTTCCGTGATTTCTCTTTAAATTGAATCATCCTGTTGAGCCAACCAA  
TAGGTGTTGCAGAACTCAAAAGCCACATCAACTCTACATGAGCACGGACATGAGACTGCACAAAGACTGAA  
GCCTTAGAAGGATCCACACCACATGCTAAATAAATAGCAGCTGTATCCCTTGTTGACCTTGGCAATTGTTGTG  
CTTCATATGGCAAAGTTATCGCATGAAGGTCCACAATGAAAAAGAATGTCTCATATGTATCCTGCAAGCGTAT  
CCAGTTCTTTATGGCACCAAGATAATTTCCCAGATGTATCAATCCTGTAGGCTGAACACCAGAGACTATTCTC  
TTCTTTACAGGGCTTGAAGAAGACTCAGAATTAACAGGTTTCAGAGACAGCTACATTGCAAAGGCACCGGAAA  
TCTCGACCGGCTTGTA AATTACGTTGACGAATTAGCTGTGATCTTCTCAAGTATTTACCTGAACTTAATCCGCG  
TAACTGAAATGAGAGAGTAGAGAACGGCCCATGCTGCTGCTTTTTTAAGGTCTGCGAGTTGGAACGCAGTTT  
GGATGAGATGGTG

>TCONS\_00034064

AGAAGTGTTCTTATATAATTGTTTCAACTTCATCTAGGTTTCACAGCAACTCCATTTTGTGTGTCTCCTGACCTCA  
ACTGGTTGGAAATGTCATCAATAGCGTCATTTCAGCTGGACAATCTTCTCCGTTAGTATCTTGCCTGTTTCTCC  
AATGCTTTTTTCTTCATCATATATAAATTTGGGCAATTTTCTCATGAGGTCCTTCTTATCTGTTTCAGCTAATGCCT  
TGCTAATCTGAGGCGCATAGATAACAACCAAGTGCACCAATGATTACTCCTCCTAATAGAAAGCCACCAACAA  
AGATTCTGGTATTGCCTGGCCTTCCACCATCACTATATCCTGCTTGAACGGTCAATGAACTTCTAGATGAGGAT  
GATTTTCTCTACTCCTTGGGCTGAAGGCCAACTTGGTGGTGCCACTGACACTTTGGTCTGCTGACTTCAAACCT  
AGAGCCTAGCACA

>TCONS\_00034099

GTAAATACGAGCAATTGCGATATACTAATCTCTCAAGTGATTCTTTAAGTCTCATGCGGACCAGATTAAATAG  
TGTGTGACACGTCGCACGAAATCTTTCCCCTAACAGTAGCTTCTAGAAACGAGGATACTACCCAGTTTTTATA  
CCTCTCCAATTCGGTCTGCTCAATTCTCGCTGGTTTTTGTCCGTCACCGATTCTCCCGAGGTATGAAAAATGG  
CAGGTTCTCATATTGCCCATGCTGCATACAAGGGTCCAAGTGTGGTGAAGGAAATACTGATTGGGATTGCACT  
TGGCATCGCCGCGGGAGGCTTGTGGAAGATGCACCACTGGAATAACCAGAGGAGGACCAAGGAATTTTATG  
ATATGCTTGAGAAAGGTGAGATCAGTGTTGTGGTGGATGAAGAGTAGCGCCTTTCTCCAGTATGAAACCAG  
CAAGCATACTTGGTCTAAGATAGTAATGTAAAACAAAACCTCCTACAGTTCCTTGCTTTACTAGTAACTAGTAA  
TGTAACAAAACAACTCTTGCTTTACTAGTAATCCTTGAATATTCCTACGAATGTCCTTAACTTGAGAAATGTGAT  
GTTTGGGAATTTTGTATCCATACCATGTATATGCTGGTGCTGTGTTGAGGAGATTTGTGTCTTGTGTTCAATG

GCTGTTCAAGTGTCTTAGTCCTTTCAAGCTGGAAAATTGTGTTGATATGCCTGGAAATTTTGTGAATGGACTATAT  
AGCTATGTGAA

>TCONS\_00034176

GCAAGTTGAAGTGGAAACCCTAGAAAAAGGTTTCTTGGTAAATGTATATTCAGAAAGAAGTTGTCCCGGCTT  
GCTTGTCTCTATATTAGAAGTTGTTGAGGAGCTTGGCCTTAATGTGCTCGAAGCTAGGGTTTCATGCACCGACA  
CCTTTCGTTTAGAAGCTTTTAGCGGAGAGAATGAGGAGAATGAAGAAACCATCAATGCCCAAGTTGTGACAG  
AAGCAGTTTTTTGAAGCTATTAAGAAGTGGAGGGAAAGCAACGAGCAAGGCTAATTAATCAATCAATGTAGCT  
TAATTAGCTA

>TCONS\_00034239

CCCAACTTTACGCTATTTCTCCCTTCAGTGACCTCTATAGTTCTAGAAGAATTCTTCACGAAGATCAAGGTTTG  
TTCGCAGAGAATTAAGTCCAGCTAAAGGATTTGCAGTCAATATACAACATTGTGATTGAAGATAGTCTAACA  
AAATCTGTAGTTCATCGGGTGAAGTATGTCGTAGGCATAAGGCAGTCTGGAAAGTCAGTGTTTAGTTCTTCCA  
AGAACGAGCCAATATTGATAATTAATACTTGAAGTCTAAAATATATGTACATAATCCTATCAGAACTAATAT  
ACAAAATATCATGATATATTCTAAACGTGGAATGGTTTCCGTGG

>TCONS\_00034326

AATTTTTTGGGCCCTTTTCCCTTTTTTCACCTCTTCTAGGTGTAAGTCTTGATTAAATTATCTGAATCTAAGTGTT  
CCTTCCATTTTCTTACCCCAAAAAAGAAAAAAGGTTTCGTCTTTGAGGAATTTACGCCAAAGGGGTACAAG  
AATTTATAGGAATTTCTAAGGATTTAATTATTTTATTAAGTCTGACATAATATAATGGATTTCAGATTCTTGAC  
TCGTCTATTTACGTCTTCAAGGCGTTACCAATCTCGATCAGGTTTTCGTTGCTCGGAAGTCAACCTGGTGTAAC  
GATTACAAGCTTTTGTTTTTCCAGCTTTTTCGTTTAATGAGCTGAGGTTTAGTGAATAGGTTTCTCTACCTGAAA  
AGCATGGAAGAA

>TCONS\_00034333

ATATATATAGTATATGTTAAAAGGTCCAAAATTAAACAGGAACTGTCCTTCCACTATTCTTCATTTCTGTTCCA  
CTTTCCTCTTCTCCTTCATTTTCCCTTGACATTTCTTCCAATGATTTTCCAGCTGCTGCTGATATTCATGGCATG  
TTGACCTAAGCCTGGCTGGGAAAATCTCCGCGGGGACAACAAATGTTGTGGCGTTTGGACCAAAATTTCGCGA  
AGAAAAAGGTAAGCGAGTACATGATCACGAACCCGATTCTGTTATCCTTTAGAGTCCAATGATGATAAGGAA  
TGGCTAAGGCAAACATGAACACTGTCATGAAGAAGAATCCCATCAACTGAATTGCAAATCGACCTATTTTGT  
CGATGAAGAATACTGTGAACCAGTAACCAGGAACAGTACTGCAAAGGGCGATAAGAGTTTGCGCCCTTGCA  
ATTTTGTAAACTTCTTCCAACGCATTCATGGTTTGCGCTGGTGGAATCCATCCAATCGCGCTGAAAATGTCCTT  
TTGGAAAAGGTTTTGGCTGTAGAATGCAATGTCCAACAAGAACCATGTGCTAGCAGTTCCAAGCAAGTGAAG  
TCCATGGCGACGGAGGAACTCCTTAGAAAAACAAACCAAACTCATTCCCTGTGTTTTGAGAAACATTCTCAACT  
TTCTCTTGCTCTTCTTCAATATCGACTTGCAACACTTTAGACATGTCGTTTGCTGCCTGTTTTAAGTTCTTCGCCA  
CCAATGCAGTGTAACGAGCAGTTTCAGGCATCTTCATACGCCAGTAATAAGTCATTGCAGCTGGGATTGCACC  
AAACATAAGAATTATACGCCACACGAAATCAGCCTGAGAGACAGTTGAAGCAAGAGGGCCGTCCTGATATG  
TTGGTGACGGGAACGCGCCCTTAAACGCAGCAGAAACAATGATTGCCACCATTCACCAGCCAAAATTCCAA  
AACCTTGCAATTGCAAAAACAGCAGCAATGAACGCTCCACGCGTCTTTTTATTAGCATACTCAGACATGATAGT  
AGCAGAAAGAGGATAATCACCACCAATGCCAAAACCTAACCAAAACCTGAAGAAACAAAGTGATGTCATA  
ACACTTTTTTGGTGTATGACCAAAGGAAAGCCCTGAGGCAATTGAACAAATAACCATCATCATAAGGGTCATT  
CCATAAACTTTTTTCTCCCCATTTATCTCCGAGCCACCCGAAAAACAGTTGACCAGCAAGGGTCCCACAGA  
AGGCGACTCCATTCACAGCAGCCGAAACGTTAGGAGGGAGAGATCCAGGTTTCAATGCCCCGTGCGGGTGGT  
AGTAAATGCGGCCAAGCAATTTTGTGACCAAAGAAATGCAGAAAAGATCATAAGCATCAGTAAAGAAGCCC

ATGCCAGCAATAACAATTGCTGTGAAGTGATACAATTGTGTTTTTGGCTACATCTAGTGCATTTAGCACTTGCA  
ATTGATCTTTAGCCATGACTATACTTTCTCA

>TCONS\_00034359

CTTGTATACGTTCCAAAAACGCAGGGGACTCAATTCCAACCTTTGTTGGTGATGGTCTAATAATTAACCTTGCCT  
TGATAACAAGAAGTGCAAGAAAATTCATTATTTAAAAGAATCTTTAAATTCTTTAATGGATGCCCATTGAGT  
TTTCTATAATCCGTCTCATCATAATTGATCCAGGATGTCCCAATCGATCATGCCAAAGTACAAAAGTATTGGA  
ATCAGTAACCTTTTGGTTTACGGTAGAATGTGCCTCAATTGCACTAATTCTTGTCCAATATAGGCCACAAGAT  
AAAGATGGGAATTTCTCAA

>TCONS\_00034375

CATCAGGCACAAATGAATAAGTCTCTCTATCCAAATTAGACTCAAGAAGTAAAGGTTGCCTCCTTTCAACAA  
GATTTAAGGAGGCCTTATCTTTTGCAATTACATCTAGATTTTCTCGAATGGCCTTGAGACGCTTACTTATCTTA  
ACATTATAAACCACAGGATTTGACTTTGAGAAGAAGATGCTTACCTTACTCACCAATTTTCGATGTGTCATT  
CAGTAGCAAAGTCATCCAAGAGATCATCAGCCTCAAAGAAAACCTTTTTTAAGTTTCCTTATCCAATCCCTCAC  
CTCGTGGCTACTCTGCTGCTGCTGCTCCGCGT

>TCONS\_00034376

AAGCATATCTTTAGATGGTGAGGAAGGTGATTGTAGCTCAATCTCAAAATGGCCATGACACTGTCGCCTCCTC  
GTGTGATACTTGACAAATCTTGATTCTTGAAATATATCCATTCATCCTCCGTTCTTTTTAGGCGTAGTAGGCTTC  
CTACCGACCTTATTGCAAGAGGAACCTCCACACTTTTTCACAATTTCTTTCTTCTATTTCACCAAACCTCGAA  
TTTTCACTCTCTTTGTTACA

>TCONS\_00034486

TTTTAACATTAGCCACACAAGGATGGGCCAAAATCCATATCGAACAAAATTTGATTGTCAGTCAAACGCACG  
CATAGAACATGTCCAGACACTAACAATATAAAGATACTAAAGCCAATGTGCTCATTATCCTCCTGGCTGCG  
CAGCCTAGCAAGCTTGTTTCGTCACAACCACATCAAGTTGTGCTGCTCGCTCAACAATTTCTTTCTTCTTCTG  
TGGACACATTATGTGCAATCTCTGCACAGTAAATTCGGTTGTGCATCATTAAGATCTCAAGTTCACTCGCATTG  
TGCACAACAACTTCTTGAAGCCATTGGGAAGATAGTGACGTGTCTTCTTGTGACCCATATCCAATATTGG  
GCATCAGCACACATCCCTTAACTTTCTTCTAACGCGAGAATCAATACCTTTTGGTCTGCGCCAGCTTTCCTTA  
ACAGTGATTCTGCGGTGCTCTGGGGTCTAATGAACCTTCTTGACCTCTTCTTCAACCTTCTTGTTCAGCAA  
TGGAACCGCCATTCTTACCTTACCTTCTGCAATTCAAC

>TCONS\_00034545

GAGAGAGTACCAGCGTTGCGATCGGAAGTGCCAGATTAGGTGCGGACCAGATGGCAAAATTGATGCAAACC  
TGGGCTGAAAGTGCCCAAAAGTAGCAAGCAACTGAACCGAGGCTATTATTGTAAGGAGTTGCACAATTTTGT  
TGTAATTCACAATAAAATCTTCATAGTTTGAGAAAATAAACCTTAATTATTACGTGTATGTTTAATTAATATGA  
AATTTTATTGTTGTATGACATGATGGTGAAACGTGAT

>TCONS\_00034573

CTGAACATTAAGAAAAATAGCAAGATCCATGTGTACAATTCAGCTGCCATTCTCAAAACAACCTCACGAAGTG  
AGACTTACAGTTCCAAATAGTGCAACTGCCGATCTGCTATGCTGCATTCCTTTTATCATTTTGCTAGGATCCCT  
CATATAACCAGCCACTTGTTGACTAATGTCCTGATTAAATGCTTGCAATTTGCCTTTGATTGCGGCAGCACCAG  
AGGTCACCTGGGTCTTTCTCTGCCATTTATCTATCGATTTGTCCCTAAAAGCAGCCATCCTTGAATGCATTGGA  
GAAATCTTCTGCCAATCTTCATCAACTTCACCATTTGACTCAACAGAACCTTCCGAAAGCTTCAACCTTTTACC  
AGAATTAACGTCCATTGATTGAGTAATTGATGGATTATTCTCAAGTAGTACCTCTTGCAATTCAGTATAGAAT  
CCAAGGTTTTTCTGGAGGAGGCAAGTAGATCTGAATATGCATCTTTAACTCTGTCTCAGAATCACAAAAGA  
AGATCTTATTGGTTCCTGCGGAAGTCTATTGGAGTTTGAGAAAGCCTTTTGCAGCAAGAACCTTAGTTCAAGT



GTCTTGTCCCAGAGTGCCTTCTGGTTTCTAACTGCTTGGCCTTTGAGAAGATCCTCATCCTTATGGCGCTTCAG  
ATTGCCCAAAGATCTTGTTCCTTGTGCTTGAGCTCCATATATTCCTTCTTAAGTTCTTCGATTCCAGCAATTTT  
ATGGTCCTCAGTCAGTTTCTCTCGGTCTTCTTCTTCTTCTTCTT

>TCONS\_00034574

CAATTTTTGGGGCCTAATGCAAGACATTTGTTGGCCTATGGGTAGAGCCGCCTGTGAACAAATTCTCAAACAA  
TTTGGGGGCCATTGGTGGAAGATTTACAGGCTGAGGAGCCATGAAATTGACAATCTTTTCATGAATATTGTAC  
CGTATTTTACGACTCTTTGATGCACGGCGATCAACAATTTTTCGTTTCTTCGTTTGAATCTCTTCAATGCATAG  
AATGCCGTCTC

>TCONS\_00034582

ATCACGTTTCACCATCATGTCATACAACAATAAAATTTTCATATTAATTAACATACACGTAATAATTAAGGTT  
TATTTTCTCAAACATGAAGATTTTATTGTGAATTACACAAAAATTGTGCAACTCCTTACAATAATAGCCTCGG  
TTCAGTTGCTTGCTACTTTTGGGCACTTTCAGCCCAGGTTTGCATCAATTTTGCCATCTGGTCCGCACCTAATCT  
GGCACTTCCGA

>TCONS\_00034598

GTTTTACAGAACCCCTTGCCATACCAACAATATTATGTAAGAGTCTTGCATATTCTCAAGATGAGTTTCGTAA  
AAATACGTATAAGAAGATGAGTGTGCAGCCATAATAATTAGACAAATAAAAAATGATCAAATTACATAAGG  
TTTGAGTAGTACACTTAGAGGACAGATGAGAACATCTTTAGAGATGGTTTTAGCATGTCATTCTCAGGCTAAA  
TGCTGATTCTATGATGATTGAGAGTGTTGAAAGTCAGTAGAATCAATAAAATTATATATTTAAATATGTCTAA  
GTTTCATGGAGTGACTCAAGAAAATTGTACAGGGTATTCTAGAATCATTGTATTTAATTGTATGATATTACCTG  
CCTTGTTAGATGTAGAAGATAACTATTTATCATATTGTAATTACATGAGGAGGTCTTCTTGACATTGTTTTAC  
ACTCAAGACAAGGCAAGTTCTCTCATTTGCTTGCTTTTTACATGATATCAAAGTGTCTGATCTTGGTAGAAA  
CCTGAGTAGCTTTTCGTCTACCAGCGCTGACCTTTTGTGCGCTGCCAGTTAAAGTTTTCTTCTTTCTGTCTTCTT  
TTAGTGACCTTTTAGGGGCAAACTCTTCTTTGCTGTGACCATTTGCATCTTGCACCTCCGCTTCCTTTTCGAT  
GACCGCCCAATGACCCTCGCCTCTTTTCTAGTGATTATCTCGTTTGACCGCGGCTCTTTCAGTTGGCTGCTCTGG  
AGGCATCCTTTATGACATGATTTTATAGCCACAAAAGTGTTTTGACATGTTTAAGACCACAAGTTATAGTCTTT  
TTCCCCCTTTAAACTCCTGCATAGTCAAACACGTTTACATGAAGTGAAGGTAGCATAACTGAACCCA  
ACTAGTTCTGTGATAGAGCTTGTGCGGTGTTGATATATTGCAATTGGCACACGGGGTGACTGTTCTTCTTTCTT  
TCCAATGTGAAACTCTTTCATTCCACTTGATACCCTCAACTGGTCGCAAACATTCAAGGAAAAGCAACATTAA  
GTGTTTCTATCTAAGA

>TCONS\_00034780

CATTATCTGTCTTCTTGTGTTTCACAAGAATATTCCAATTAACAAATGGAGCACAAGGCGTCCTTCCTACGG  
TTATTCCTGCTTTTTCTGGGCTTTTCCCTCTTGATCTCCACCGTTGCAGTTCCCTACTCCAGAAGCCTCAAGACA  
ATTACAGGAAATCCAACATTTCAAGAATCTCATGACAAGGTACTGAATAAAGAGGTGGAAGAAGAGGGA  
GCTATTGGTTGAGAGAGATGACTATGATGGAACAGGTGCTAATAATCGTCATGACCCATCGCCTCCTGGAGG  
CGACTAGTGAAAATTGCAGAAATACATTATTTAAATGACGACTGTATTTTCCTTTATTTTTTAATGTTAAGAAA  
ATAAAAT

>TCONS\_00034806

ATTAAAAAATAAAGGAAAATACAGTCGTCATTTAAATAATGTATTTCTGCAATTTTCACTAGTCGCCTCCAGG  
AGGCGATGGGTCATGACGATTATTAGCACCTGTTCCATCATAGTCATCTCTCTCAACCAATAGCTCCCTCTTCT  
TTTCCACCTCTTTATTCAGTACCTTGTCATGAGATTCTTGAAATGTTGGATTTCTGTAAATTGTCTTGAGGCTTCT  
GGAGTAAGGAACTGCAACGGTGGAGATCAAGAGGGGAAAAGCCCAGAAAAAGCAGGAATA

>TCONS\_00034833

TAACAATCAAGGTTAGTCCGTACCAAATGCTTTCTAAATTCATAAATGTTTGGTATTCTTTTAAAGAACACTTA  
GTTTGTAAAGAACAAATGCAAATTGTTTAGGTGAAAGCCAGGTACTTGTATTGTACAGTAGAGTGCCAGGAT  
TCTTCATTTAAATTAAGTTTAGCTGACAATCTATTTGTATATGGACATGTGCTTGATTGTTTGGTCATTTG

>TCONS\_00034960

CAGGAGAGATGTTGAAACCATGTTGCCTGAGCAATCGAAATTGAAGTGAAGAAGTGCTCAAATCATCGCAGT  
TTGAGGTTTGGTTGTAAATTTGATCCAAAATCTCATCAATTTCTTTCTCAAAGTGGTATGATATGCCAAGGCGT  
TCAATAATGTCAATCAAATTCAACGTATCAGACAACCTTTCTTCCAGTTGCTAATAGCATACTCCTCGTTTGTTT  
CTTCAATGCTTCAATCTCTTGAGCATACTTTTCAGCAACCTGATTATCAATGGAGAATGAAAGGAAATGATCA  
CCCCAGAGACTAGGGGAGAAGTCGGCGACGGGACGAACAATCTCTTCT

>TCONS\_00034963

ACTTATTTCTAAAATGCCACAACCTCAAGTAATATACAACAACTACCAATTAAAGTACAAATGAAGTCCCA  
AATGAGGGACATTAAACAGGGCTAATTGGAAAAATTGATCTCTATAACCCACTTCACCAGTTTTTTTACATGCC  
TCGTGTAGATAGTAGACTCTGGTGAACACCAGCCAGTCCAATGGAAACACTAGCGATCAATGAAAGATTTGT  
TCATAAGATTAACTGCTGAATCCATAAACTTCCCAACCGACTTAAGTTCTCGTCCAATAGGTTCCGTAAACTT  
CAGGTCGACTTCAATGGGCCATACCTTAAGCCCAAGTAATTTAATAGGTGCAATCTGTCCTGGCACAATGCA  
ATCTGGACCTGCAGCTTCTACAATAGCCTCCGTCCCCAATCCACTTCCAATTGGATCTGGCTCCTTCATAACAG  
AGAGAGCATAACTGGAATAAGGGTTTTGAGGGATACGAAGAATAGGGGAGTAATGAATTTTGGGGATTGGC  
TTTGAACCAGAAGCAGCTCGCCATGGTACATCATTCGGTAGTGTAGCTGCAGCTCCTCCACCCATTTTTCTTGA  
CAT

>TCONS\_00035115

AGTTGACAAAGACCCATTTGCAATACATGCCTTCTTTGCAGCAGATTTAATCACTGGAATATTGAGGACATCG  
CAAAAATCCAGTAGCTTCTCCTTAACACACTTGTCCAGCCTCTCTTTGACCTTCCCCCTTTGTTTTCTCATCT  
TCAACCCAAACAAATCCTGAAAACCTGCCCTATGTTTTCTTCAAACCTATGTGCCTTTGTTTTCTTGCCATAAAG  
AATATTGTGTAGTATCTGCAGGTTGTCATCAGGTTTTCTTGGATAGTTTATAAGCCACATTCGGGATGTCCTT  
CAGCTGAGTACCACTACCCTTCCTAATTGACAATGGCTTAGGCGTCGAACCTTCTAGCACCTGAAGACTCGGAG  
TAACGCTCCACAGTTTTCCGTTCCTTGTCCGCCTTGAGCTTGGTGTGAGTGGCTCTTCCGTACTCTCCTTATTT  
TTTTCTCACTTTTGCTACTACTTTTCTTTGCCCTTCTTCACTGGTGTTTTCACTTGCTTTTCTCCTCCTCTGAT  
TCCTCTTTTTCTCCTCCTGCTCTGATTCGTCTTCTCCGCTTCTTTTTTGTCTACTTCTCTTTGTCTTCTTCTTCT  
CGTCTCATCTTCGGCTTTAATTTTCATCTTTTTTCTCCTCCTCCCCTGCTTCGGTTGACTTTTTCTCTTCTTGT  
CTTGTAAGGAAGATTTCTCCTCCGTACCTCTTCTGGTTTCTGATCTTTCTCTGACGCCATAGACGAAACAATA  
CTACTGAGCAGCAGTGAACGAGTGGTAAAACCCTAGTTTGGGGTTTTTGGTTTTGGGGATTG

>TCONS\_00035116

CCTCCTCCATGTTTTCTGCATCATCACCACTTCAGCTTCATCCTCTTCTCCTCATCACTCATGTTATTTATTA  
CTTCAGTGATTATTGCCTTCACCTCTGCTTTTCTGTGCATCAAATCCACATCAAAGTGGCTACCTAGTTTCCTGA  
TAATATCAGATAAAGTTGCAGTGTTAAAATCAACTTCTTGAAGAATATTGCTACTACTGCATGCAATTCTTCT  
TTGGTGGGCTCTGCTTTGGCCTTCTTTACACTTTTCCCTTTTCTTCTTCTTTGAGAAACCTTTGCAGTAGACTTGC  
CTGATTGT

>TCONS\_00035117

CCATAGTACATCTCCCCACTGTTCTTTCTAAAATACATATAAGATCCTGTCTACATTTCTCCACTTTAGTAACA  
GTATATATCAGCAGGCTCTGAATTTCTTCTGGGGATCAATGAAATAATAATAACACAAAGTAAACATAACC  
AATTACTCAATAACTCAACATTAAATATATCAAATTTTCATGGCAAATTGAAAGCTGCAATATGGCTGCTTAGA  
TCTCCATGAGTTCTTCAAATGTCTTCATAGCAGAAGCTGGTAATCCAAGAAGCACATTGATGTTTCTCCTCTCT

TTCCCGTGAGAAAGAAACAGAGAAACTTCCTTCTCTGGCAAAGCCACAGGTCCCGACACAACCTGGCTCTCCC  
CACCCAAAATCTGTAGTGTGGAAAGAAAGCCTAGACCAAGTAGTAATAAGAAGAGTAGCAGTTAAAGATGG  
CCTAACTCTTGTTGCTTCAAAATAGTCTATGGCAGATCTCATGTAACCTATCTGTTACCATTTTAAACAGCTTCTTG  
AACCAACTTCACAGCAACAGAAAGTGGATTCTCAACTATCTCTGCAGCATTACAGAGTGCATTAGTTAACAC  
GATCCCGTTTCCAAAATATCCTTCTGTAATTGAGGGATCAAATCTTGATCTTCCATCTACAGCAAAGAGCAGC  
TTTGTCTTTTGATCAGGTTTCATCTGTAATGCCTGAGTTTCGCGCTTTCCAGACGAAAGCTGAAAGGGCTTCAAA  
TGTAGTACACTTGCAAACCTCATTGTGAGCATATTCAAATTTTGGTGGATTTCTAGCCTTGAGTATGCTCCTGTC  
TAGGAATGGAGGGACTTTGATTGGTACACCTCTGGCAGTTTCACCCCAAGAATTCACAAATTCCATTGCTCCA  
ATCCCATCAAACATGCAATGGTTCATGCACAAACCAAGCACAAATCCCCCACATTTGAACCTTTGTCACCTGA  
ATATAGAAAATTGTCACTCAGTATGT

>TCONS\_00035153

CCTGCATCAGGGTTCTAACTTCATCTTTTGTAGGAGGATGAAAATGAGGTCCGGGCAAACGTTTATTAATATC  
ATTGTAGACAAGTAACACAGCAATATAAAGGTCTTCAAACCTCAGATTTGCTCTACCTGATTCATTTTTGAAA  
TGGTCAAAGACCTTGTCTGTTATTTTTCGTATTTTTGTCTCTCTCCACTGCTTACCTTGAATTTTTGAAGAATCT  
GTCCCATGGGTTTGAACCTTTGGAGAAGACAAAGGGAAGCTTGCTACGGTAGTGTGATTTTGGTCAACTTGCA  
CAGGGAATAAATACTCCAGAAT

>TCONS\_00035168

GCGTAATTTCTGAAAGTTATAGGATGACTTCTCTCTTTTTTATCGATACTCTTTTGGAACCTCATTATGAATTAA  
ACGGCTGTAAACATTCAAGTGTTACTTCAAATGAGGAACTTCATTTCTTGCGCCCTCTTTTTTCTCCTTTTGGCT  
CGCTAAGTGGATTGGGCAGCATACTTCGGAGATTGTGGGATGCCTGACTGACAGAGAACGTAGTTGGGGAA  
AATGCCTACATATTGTTGGATAATGTAGTTGTAGAGGGCACTGATTTTCCAAATGTTAGTGTCTTCTCAACATC  
TAACAGAGGTTAGCTAATTTTTGGCTGTCCTGTTTAGGTTTTTAGCAATAACTTTCTGGCAGAAAGGGTGACGC  
CTGTTTATTGTGTCATTCTGTTAGCTCCTTCATGGTAGATATGAGCAAATAAGTTTCTGCTCAAATATACTACA  
GTATGAGTGAAACTTAGAGTGAGGATCAGAGCTGGCAAGTCCACAAGTTCTATTCTTTCTCTGGGTATGG  
TAGTGAAAAAGAGTGCAACAGTTGTTGCTTGTGTCTGTCTTGTGTTTTGGTATATGAGGTACATATATTTTTGGGG  
TTATACTGCAGCAGCGGAGCTGGAAGTAGGAGTTGATGCTATCTAGATGGGTACAACATGTTTATTATATATT  
TCATTCTCTCAACATTGTGCAGAAGATTCTTGATTTTTCCAACCTCGGTTGCTGCTTGCCTAGTTGGCTCCGAA  
GTTCACTCTGGCTTCAGTTCAAGCCTTACCAGATAGCTGCCGGGGCTGCATATCTAGCATCAAAATTTCTGAA  
CATGGATTTGGCTTCACATCATTCTGTCTGGAAAGAGTTTCAAACACCCCCGAATGTGCTTAGAGATGTTGCA  
CAACAGTTGATGGAGCTCTTTTAGGAGACATGAGATACGGCAGTTAACATCAGCAAAACATAAAAAGTCAAT  
ATCAACAATTTTTTGGCTCTTCACTTGGTAGATGTATTTGTAGATTCTACCATCGTGCATAGGCTTAAAGATCA  
GTGTATAGATTTCACTGTGGAATTTCTTAGTTTGAATATCTGTGGAGTGCTTGTCTGTCTATACCTTATAGTAA  
AGAAGTTCAATTCTCCGTGTAAATTGTTTTTTTTCTCACTGCAAAAGTGTCCATTAATTATTGAGATCGTTCTCT

>TCONS\_00035316

CCTGATCCCGGAGCTTGAATTCCATCACTAACTACCCTCTAGCATATTAGCGAATAGGGTGGTACTGTGTGAT  
CCCTCGCTTTGGAGGCAACTTCCTCAAAATAAAAAGGACAAGTGAAGAAGGCAGTATCTCCACCAACAGGT  
AATATATCAAATTCAAATTTGGATGATCCAAAACATCAAGATCTGCAGCTTTATTAAATGCATTGAAGCACA  
TCATAACACATCTAATGAGGAAGCATGAAAAACATATTGTTGTGACATAGCCAACCTCCTGTAGCTTCTTGCG  
TCTCCCTTTTGATTCTACTGGAAACCGCTGTAACATAAGGAAAAGCCTTCCACCATAAAGGAGAAACCTAA  
TGCTGCAAATAGGGATACACCTGCAAAGAACATCTTGATAAGATCATGAGTACTCGAACAGGTTTCCACCA  
TATTATCAGCCACAGTATAATCTGGATAGCATAAACCACTCCATTAATTGTGAAGAACTAGGTCTAAGCCC  
ATCCGTGGATACGGCACGTGCCTGGTAGTATATCTCAGCCCAGAATAACACTAGCAGGGCATAAGTTGTGAA

GAATGCAAGACTTGGCATATCAAGCAAAATATGTTGGACAATCTCGGGGTGAAATTTCTGAACATCCCGCCG  
AAATGCAAAAACCTAGCGA

>TCONS\_00035356

CCTTCGTTGTCCCAAATCACCCCTGAACCATTTCTTCAGGAATCTCGACTGCACCAGTAACATTAAGCGTAG  
GTCTCAAGGTTACATCAAATATGTTGACAACACAGTAGGTATTCTTCTCAAAGAGCTCGACAACCTTTTCCTC  
GGAAGGGAACAGTGCTGCGGAAGGAAAAGTAGAAGGTGTAACCTTGTTCAACTGTGACAGACGGATCCCCCA  
AAGCAAGTGCTTGAAGGATGATAACATGAATACATGAAAAAGCTTGTTAACAACATCCTGCGCGTGGCTGAA  
GGAAAGCTTTTCCGTAGTTGTTCAACCAAAGGAGTGCCATTATCTCCACTACCCCTGGGAGTGGAAGCGGTA  
GAAGGAGGAGGGGAAATGGAGTGCGGAGTAGAGGGATCAGCAGAGCAGGCTGAAGAAATGCTATCGAAGC  
AG

>TCONS\_00035439

AGGGGGTAAACTTAGAAGAAACAACATCCAAGAATAAATAAAGCAGAAGCTAGATACTCCATTAGCGGATA  
TGAAGATATTTACTAATGGCCTTCAAATATCCATAGGGAAGGAAGATGATAGATCACTTTGTGAGGACATAA  
ATAGCATAGACAATACCAGGTAGCCATCCAAAGAGAGTCAGCAAAACACAAATCCAGAATTCCGCCTGGCA  
GCCAAACTTGAGGAAAACACCAAGGGGAGGCAATATGATTGCCAACAGAATGTCTATGAATGTCAGTGTGC  
TGGTTCTCATTTTTCCCTTCTTTCT

>TCONS\_00035451

CCCAACAATCAATTATTAACAGTACTATCTTTCACCTTTTCTTCTTTCTGAGGCTTCTCCTAAAGGATACTTTTG  
CATCGGCTCGCTCTCGTTAGGTAAAATTATCGAGGCGAAATCAGCTCTTTTATGCATGGCGACTGTTGCTCATC  
TTGAGGATCCTTTTGGTTTTGAAGATTACTTCCCTCAATGATTGAAACATTGGGTGCAGAAAGGTTTATGATG  
GAACTATGCAACGGTTTCTGCTTGCTGATGGATGTAAGTATAGGGCTTAT

>TCONS\_00035454

AGTTATGATTTCGTTCCCTTCATTCATGAGCAAAAGATGCACATAATATTTTTTCATTCTTTAAACTGCCATTAC  
GACGACACATAGGGCAATGTGCTTGAGCCGATTGAGAATTCACCCACTTCAAGATACAATGAAGATGAAATG  
CATGGTTGCAAGCACCCCATATTAGTGGACAATCATCACCGGGGAGTTTGCAATCAGGACAACAACCATCAA  
AAGCCATCCTACATATTCCACAAGTTTCATCCTGAGCGTCCCATGTCCACGAAGCAACTGCATGCCATCTGCA  
TACACAAGTAACAAGTAAGCACACCATGCTGTCTTAAGTACGAAAATTATCACATGCCATGAAGAGGACATA  
CTCTATTCACGAACCCGGCAAATCGCCCAACAGAAAAGGTTAAGGGAAATTCATGTTAGTATTCAGTCCTG

>TCONS\_00035518

GGCACATTGAATGCGTCAACTAGAGATTCATCTATCATTCCTTCATTGACCATATCAATAAGACTTGATCCGA  
AAAATTTGAGGAGACGATAACCTGAAAATGGCGAAACTAGGACCATTATTCCTCCACGAACAATCTCCTCAG  
CTCTTGCAATTCAAGAACACTTCCATATCCTTGTCGAACTGAGAAACATAAGCGTTAACTACTGCAATATTTGC  
GGCATCTACATAGTGAATCAATCCCTTATTCCACGCTGGGGATTCTCATCT

>TCONS\_00035539

CGACAGTTAACATAGAAGAGTAGTTATTTTAGATTGTCATGCGCACACCAAAAGCTTCTCGAACACAACACT  
TCCAACAAAATTTTCCTATCTATCTCATGTTCCCTTATTTTGAATATGGTCATTTCCCCTGTCTGAACTACGAGG  
AAAAATGGAGACGTCCTCCAGGACTTCAAGTAACTTCTCGAACTCTTCATGGAACCTTTTCTCAGTGTAGT  
CGAAACCGTAACCAGGTTGTGGCTTGTCATAAATCCAAATCCGATCCAGTCAGGTGCAAAGCAGTGGAATC  
CAGTATCCGCCATCTGAGACATAACAACCTCGATAGCTGTATGATTGTGTTGGAGCTCCATGGAGAAATATAA  
CTGTCCCACGTCTGCTTTCAGGTGATCCTGCAATGGGCAAACTTGAACATTTTGAAGTCCTTAAAC

>TCONS\_00035554

ACTAACTTCATACCCCAAGAATAGACCTTTTTGTCTGTCTCTGTTTTGGATAGTTTAATACTAGTCTCCTCTTCA  
ATAAAAAGCAGAGGAATACTGAACTAATACCAAAACCAAAATGAAAAAACTTCTAAATGAAGACCTGG  
TAAGCTGCAGCTCCATCCCCTTTGCAAAAAGCTATTTGTGGGAGTGATTACTGGATCCATAACAAAATCCACA  
GTCATCGCTTCTTCCCCAACATAATTCTTGTACTCCTTGACTTATATCCTGGCATTGTTGCTACAACCTTCATAA  
TTCCCCCAGGCGCCAGCAACCGGTGGTAATCGGCTAACGCTTCCCTTGCATGTATCTGAAGACAATGACAA  
GAACAGTAAGAAGACTGTCCTAGAAATATGAATTATCTCACAAGTCCTATTTAATGCCAAGACGAAAAGTGG  
TGTAACAGATGACATGGAATAAATAAATAAATGAATGAATTACCAGTATGTGAAAAGTTAGCTAAAAGGAA  
TAATCTGCCAAACTACAAACAGACTAGCCCCTACTTCCCAGGCTGATGCCTTTACCTTCTTATTCCCCTACGA  
AAGAGAAAAAGAGAAACC

>TCONS\_00035555

CTAACTTCATACCCCAAGAATAGACCTTTTTGTCTGTCTCTGTTTTGGATAGTTTAATACTAGTCTCCTCTTCAA  
TAAAAAGCAGAGGAATACTGAACTAATACCAAAACCAAAATGAAAAAACTTCTAAATGAAGACCTGGT  
AAGCTGCAGCTCCATCCCCTTTGCAAAAAGCTATTTGTGGGAGTGATTACTGGATCCATAACAAAATCCACA  
GTCATCGCTTCTTCCCCAACATAATTCTTGTACTCCTTGACTTATATCCTGGCATTGTTGCTACAACCTTCATAA  
TTCCCCCAGGCGCCAGCAACCGGTGGTAATCGGCTAACGCTTCCCTTGCATGTATCGTGGAAATTTATTCTTT  
TATAGCTATTAAGGCAGGTAAAGGCCTGCCTTCATCTGATGAGAAAAATCCTTCCGTGTATTCTGTCTTCACA  
AGGCTTGCGACAAGATTGAGCATACTCATCTTGTTATACTCAAAAAGAGTAGGAAGCTCACGTGCATTAGGC  
CATTGTGCATCACTTATCTCTAGAGTCAGTTCAAAACAGCCAGCATGTAAGTAATTCCAGTCTTGCATGCCTCC  
ATAGATTGGATACCAATATGCACCATTTGTTATTCTCCTGGAACTCCTCGCTTAGAGACATGTTATGGTGG  
GAATGACTGTAGATGCTAGCCATGTGTCTGAATGTTTCATCATCTGGACAGCCATAATAATATTTTCTTTGTT  
CTCAGTTCCATCCCATGGATAATTTGCTACAAGTGCTCCCCCGTGCAGACTAGCAGATGCTGTGAAGTGCATT  
TCCTCCAACCAACGCATAATGGCTTTTGTTCAGGTTGATGTGCGCCAGGATCATCATTTATGGGAAAGAACT  
GGTCAGGAAAGTCTCGGTTCAAATCGATATTGTTTCGATTTCCACGCCTCCTCAACGAAAACCCATCTGGATT  
CATTGATGGGAGTATGTGAAGATGAACATTGTCTACAATCAGGGTAGCCAAGGGATCCTTCATATAATTATCA  
CAAAGCCAGTTCGCCAGAAGAATTAGAAGCTCACGACCTACAGGTTTCATCCCCATGCACGTTGCCAATGTAC  
TTAAAAGCAGGCTCAGCCTCTTCTTTGCCTGGCTTGTGAGAGATTTCCATCACCCACAATGGGACTCCCAGCA  
CACTCTTTCCAATGCTGTAGACTCTGGATATCTTACTGCACCTA

>TCONS\_00035557

GTGCATTAGGCCATTTGTCATCACTTATCTCTAGAGTCAGTTCAAAACAGCCAGCATGTAAGTAATTCCAGTC  
TTGCATGCCCTCCATAGATTGGATACCAATATGCACCATTTGTTATTCTCCTGGAACTCCTCGCTTAGAGACA  
TGTTATGGTGGGAATGACTGTAGATGCTAGCCATGTGTCTGAATGTTTCATCATCTGGACAGCCATAATAATA  
TTTTCTTTTGTCTCAGTTCCATCCCATGGATAATTTGCTACAAGTGCTCCCCCGTGCAGACTAGCAGATGCTGT  
GAAGTGCATTTCTCCAACCAACGCATAATGGCTTTTGTTCAGGTTGATGTGCGCCAGGATCATCATTTATGG  
GAAAGAACTGGTCAGGAAAGTCTCGGTTCAAATCGATATTGTTTCGATTTCCACGCCTCCTCAACGAAAACC  
CATCTGGATTCATTGATGGGAGTATGTGAAGATGAACATTGTCTACAATCAGGGTAGCCAAGGGATCCTTCAT  
ATAATTATCACAAGCCAGTTCGCCAGAAGAATTAGAAGCTCACGACCTACAGGTTTCATCCCCATGCACGTT  
GCCAATGTACTGCATTACGAAGCCTTAAAAGCAGGCTCAGCCTCTTCTTTGCCTGGCTTGTGAGAGATTTCCA  
TCACCCAC

>TCONS\_00035662

CCTCGATTACATCATTACAAGGACTGAAAGTAGATACGTTAATTACAAAGAATATTTATTTAGTTTTTCTTCAA  
TGTGGTGAACCTCTGGTCAGAGACTCTTCAAATGCATTTAGAGCTACTTTATAATGATCTAGGGATATCACCCC  
TTCTTCCACAACCTTGTAATGCACTTCTATACAACCTGGCTAAACCATTGAACGTGTTCACTAGACTCAGTAGAA

CTGGATTCAAGATCTGATGCACCTAATCGCTTGTAATCCTTTTTCCATCGTGATAAAATGTACTTTGAAGGGAT  
 CTCTTCCACACCATTGAAGTTCAGTACACACAACGCGTGCCTGCACAGATATCCATAGAAGTTGAAGCAGCT  
 GCAAATACAACGAACCTCGGCTGCTGCTCTGTTGTACAGAACTTCATAATCCCGTATCTCTCTCCTATTTCCCT  
 CTCCCAAAACACGCTCCTTCACCAAAAATATTACCATTGCCCCGTCAACATGTAAGTGTGTTGTGCTGAAACA  
 AGAATACATCTCCTCCACCTCTAACTGAACTCTTTTGAAGATCTCTCTACTGTACACTTTTGAAAGCTGCAACT  
 CAAAGGAACATCTTGTTTTGAGTTCAGGGTTCGAGTTTCTTGACTCTGTATCTGCAACCGCTTCTTCCTTGACT  
 TTTTCTGCAAAGCTAATTCGTATTTGTCAAGAACTCTTTTAGGGGAGTTTGCTTGTGCAAATATTTATCGAAA  
 AAAGCAGTCAATGTCTCATTAGACCTGGCAGTGGCCATTCCAGCAAAAAAAGTATCTTTCAAATAAACTGGA  
 GCCCATTTAGTTCGGTCATCATAGAGTGAAAGAAGCCACTCATGATCACCAACTCCAAATCTTTGGATCATAA  
 ATCTCCATGATGCTTCGAAATCAAATGGTTTCAGAGCCTCATATATTGTTTTAATTAATGCCTTTCTAATAGCA  
 TCATAGTTACGCAACCCTCCCAACTTTTCTGGAACCTTCCTCATGATGTGTGATAAAGCAACACAATGAGAAG  
 ACCTCGGAAACACCTCACTGATTGCACTCTCCAAAATCTTGCATCTTTCTGTAATAATTGTTTGAGGGAAACG  
 TCCAAGTGAGCAGGTGAGCCAAGCTTTGAACACCCAAACATAAGAGGCTTTTGTCTCGCCCGCAAGTAGGCC  
 ACAGCCCAGCAACACTGATTGACCATGGTGATTTGTGCCACAAATGCCACAAGTCCAATCTCATATTTGTTG  
 CATAAATATGAATTATCAAAATAGATCACATCAATAAAGTAAGCATATCCCGCCCTTGACCTGGCGTCAACC  
 CAGAATACATTCCTCAACTGCCCTTCATCATTAGATCCATCAAGTAAAAGAAGTTTGGGTTTGCAATTGCA  
 TTCGACAGAAATAATTATACATGGCTTGCATCTCCTTTTCTTAAATTCAGCTTGTCTGACAATCAGATGTA  
 GTTTTGCACCTCCTTACACTAAAATTGGCATTCCCTATTCGCACCTGCATCAATCACAAGTGCCCGATATAACTT  
 GATTGTGCGGACTTCAGCATCACAGTTAGAATCCAACCTTTTCTTGTTTCCAGCACCTGTCTTCTTGATGGACTT  
 GTATGCTTTTGCACCTAACAAAGTGATTGTGTTCAAGAGTAACTTCAAGTACTCTCCATCTTTTGGAGTCCACCA  
 TTCTCATCTCATCATTGCAGGACAACCAGTTCTTGTTTCCCTTGCGCAGCCGGTTTACATCTTTAATCCTCTTAA  
 AGCCCTGGCTACTGCAGCATAGTACTGCACCATACTTCTCCCTGCTATTTCTTTTGAACCAAGAATTTTTTACT  
 CTAACACGAAAACCAACCTCCCTGGCATAACAATTATAATAGTTGTAAGCATCATCATACGATTCAAACCTCC  
 ATTCCTACTGCTGGGGCAACAAATTGCTTCTGCCCATCAGTAAAACCATTTTGATCATCTAATGCATCTGACTC  
 TATTTGCCACCACCTTTGAGAAAATAATTCATCTGACTCAATTTGCTCACTGTTCTGGTCATCTAACCCATCTG  
 ACTCTATTTCTTGCGATCTCCCACTGCCTTGCCAGTAAGATCTACCTCACTATCAAGAGAAGCTTCTTCCATC  
 TGAAATTGAGAAGTGAATTCGCCGGAAGGATGGGGAGGAGTGGCCTCGCAGCTG

>TCONS\_00035663

CCTCGATTACATCATTACAAGGACTGAAAGTAGATACGTTAATTACAAAGAATATTTATTTAGTTTTTCTTCAA  
 TGTGGTGAAGTCTGGTCAGAGACTCTTCAAATGCATTTAGAGCTACTTTATAATGATCTAGGGATATCACCCC  
 TTCTTCCACAACCTTGTAATGCATTTCTATACAACTGGCTAAACCATTGAACGTGTTCAAGTAGACTCAGTAGAA  
 CTGGATTCAAGATCTGATGCACCTAATCGCTTGTAATCCTTTTTCCATCGTGATAAAATGTACTTTGAAGGGAT  
 CTCTTCCACACCATTGAAGTTCAGTACACACAACGCGTGCCTGCACAGATATCCATAGAAGTTGAAGCAGCT  
 GCAAATACAACGAACCTCGGCTGCTGCTCTGTTGTACAGAACTTCATAATCCCGTATCTCTCTCCTATTTCCCT  
 CTCCCAAAACACGCTCCTTCACCAAAAATATTACCATTGCCCCGTCAACATGTAAGTGTGTTGTGCTGAAACA  
 AGAATACATCTCCTCCACCTCTAACTGAACTCTTTTGAAGATCTCTCTACTGTACACTTTTGAAAGCTGCAACT  
 CAAAGGAACATCTTGTTTTGAGTTCAGGGTTCGAGTTTCTTGACTCTGTATCTGCAACCGCTTCTTCCTTGACT  
 TTTTCTGCAAAGCTAATTCGTATTTGTCAAGAACTCTTTTAGGGGAGTTTGCTTGTGCAAATATTTATCGAAA  
 AAAGCAGTCAATGTCTCATTAGACCTGGCAGTGGCCATTCCAGCAAAAAAAGTATCTTTCAAATAAACTGGA  
 GCCCATTTAGTTCGGTCATCATAGAGTGAAAGAAGCCACTCATGATCACCAACTCCAAATCTTTGGATCATAA  
 ATCTCCATGATGCTTCGAAATCAAATGGTTTCAGAGCCTCATATATTGTTTTAATTAATGCCTTTCTAATAGCA  
 TCATAGTTACGCAACCCTCCCAACTTTTCTGGAACCTTCCTCATGATGTGTGATAAAGCAACACAATGAGAAG

ACCTCGGAAACACCTCACTGATTGCACTCTCCAAAATCTTGCATCTTTCTGTAATAATTGTTTGAGGGAAACG  
 TCCAAGTGAGCAGGTGAGCCAAGCTTTGAACACCCAAACATAAGAGGCTTTTGTCTCGCCCGCAAGTAGGCC  
 ACAGCCCAGCAACACTGATTGACCATGGTGATTTGTGCCACAAATGCCACAAGTCCAATCTCATATTTGTTG  
 CATAAATATGAATTATCAAAATAGATCACATCAATAAAGTAAGCATATCCCGCCCTTGACCTGGCGTCAACC  
 CAGAATACATTCCTCAACTGCCCTTCATCATTGAGATCCATCAAGTAAAAGAAGTTTGGGTTTGTCAATTGCA  
 TTCGACAGAAATAATTATACATGGCTTGGCGTATCTCCTTTTCTTAAATTCAGCTTGTCTGTGACAATCAGATGTA  
 GTTTTGCACCTCCTTACACTAAAATTGGCATTCTTATTCGCACCTGCATCAATCACAAGTGCCCGATATAACTT  
 GATTGTGCGGACTTCAGCATCACAGTTAGAATCCAACCTTTTTCTTGTTCAGCACCTGTCTTCTTGATGGACTT  
 GTATGCTTTTGCACCTAACAAAGTGATTGTGTTCAAGAGTAACTTCAAGTACTCTCCATCTTTTGGAGTCCACCA  
 TTCTCATCTCATCATTGCAGGACAACCAGTTCTTGTTCCTTGGCGAGCCGGTTTACATCTTTAATCCTCTTAA  
 AGCCCTGGCTACTGCAGCATAGTACTGCACCATACTTCTCCCTGCTATTTCTTTTGAACCAAGAATTTTTTACT  
 CTAACACGAAAACCAACCTCCCTGGCATAACAATTATAATAGTTGTAAGCATCATCATACGATTCAAACCTCC  
 ATTCCTACTGCTGGGGCAACAAATTGCTTCTGCCCATCAGTAAAACCATTTTGATCATCTAATGCATCTGACTC  
 TATTTGCCCACTTTGAGAAAATAATTCATCTGACTCAATTTGCTCACTGTTCTGGTCATCTAACCCATCTG  
 ACTCTATTTCTTGGCATCTCCCACTGCCTTGGCCAGTAAGATCTACCTCACTATCAAGAGAAGCTTCTTCCATC  
 TGAAATTGAGTGATGGAAAGGATGTTAGCAAAGAAAATACTCTTCCCAAATATCTGCGAGATGGAATATATG  
 CTTTCCTTTACAACCTACAAGGGTAACGTGACATCCTCTCCCAATATACCAAGAAGGTGAACAAACCGCTTTGT  
 TATTCAGGAAAATCCAGTAACAGAAACGAACCAAAT

>TCONS\_00035758

ATCAGCACCCCTTAAAATTAACCATCGTAGTGTTCAAGGTCGCATACAACCTTTCGTGATGGTGAAAACCAAGA  
 CTAAAACCTAATTAACAAATTACTGTAGGAAATAGTCCATAAAAGCGCCCCCAACCAAAGAAAATACTAAA  
 ATAAAAGAGCAAAATTTTCATTGTGAACCTTCATCCTCAGAGAGTTGATATTCTTCTTTTGCATGGTTTCGCATCC  
 AAAAACCTTGAAATTCCAACAAAAAGATCCCAACCATGTCTATAAGAAAAATCTCCGTCGACTTGTATCCATC  
 TCCGGCTTGTGAACCCATTATATTCACCCCTGAGTATCAAAAGTACCATGTCTGGAGACTGATTAACCTGA  
 GAGTAAATCTAGGACCACATTCCTGCAGACGGGCAATTGTCCTTTCTGTGGGTTCTTCGCATCCTTGCTTTTC  
 TTACCTTTTGATTCTGTCTGTTTGCCCTCTTTGGTTTCAAAAATGTAGCGGTGATGGCGAAAGAATATGAAATC  
 ACGTTGATTGTGAAAGGTCACAACTCGACGGCCACGAAATTCAGGGTCTTGTGGGAAAAGTGACTGTATCAT  
 CCTCCCAACTCGATGCCCCAAACGCGTTGTGAAATTGGTCAAACTAGCTCAGGCTTGTGACTTGTGGCTTT  
 CCATGATTCTTGATATCCTTCCGTAGCATGAGCTTTGAAAGCTTAAAATGAGCAGTAGGTCCATCAGGTAAGC  
 CAATAATGAGAAGAGCATCTGGTTCACGGCGATTAGTGTGGACTACAATAATAGATGAAAACCTCCTTCTCAT  
 TTGCATATTGGACAATCTTTTTCAAGTCATATGTCCCTCGTTTGTAGTAATGAGCATTGGAATCACAGAAATA  
 AGATCAGAAATAAATGCTGGTCCTCGTGTAGAGTTGTAACGGGATGTAGTAATCAATATTTTCGGATCACGCT  
 CCTTCCTCAGAATTGCACTAAATTCATCAACATCATTGCCAGCAAATAGCTCTTCATCATCAGGTCTACAGAT  
 AGTCTCATCCAACCTCCCTTGATTCTCAATGGTACGAGGTACCATCTTCGGTGGAGGCTCCTCGCCTAGCTCAA  
 GAGCTTTTTTCTCAGCAGCTTCACGAGCTTTAGCTTTCTTACGCTTATCAAGCTTTTTCTGATGCTTGAGCTTAG  
 CATGTACAGCTGATCTTTTCTCCTTGTTTTAATCATTGAAGGACGCATGCTTTCTCTGCCCTCATTATTCTCTTT  
 CATCTTTTTTATGGGTTTTTCTTCTCGTTTTCCCTCTCCCGTCTTCGTTATTGCTTCGTTTCCGCCCCATTGAAA  
 GTGTGTAGTGCTAAAGGTTTCTGTGGTTAAGCTTGTGGCGTCGTTAAGGGAAGGTTGGAGAGGAGCAAAACG  
 GCGGCTTGTTTTTGGATGGGTAAATAAGGAGTATTGATAGTTTGGCCTCTACTTTTGAGTTTAGTTGTCAATCTT  
 CTCTGTA

>TCONS\_00035808

CAAAGATTGATTGAGCCACCAAATTCCTTTGGTGTCTGTGGGCTATCTTCACCCTCTGGTGGAGGATCAGA  
CTGAGGTGTCTTGTGGAGTTTACTCACATCATAGCCAACTTCTTTAGCCTTCTCAATCAGCATGTTGTATATCTC  
TTCGTCAAGATGTGTTTTCTACATAATATTTTAAGCTTAGCTTCATCACTTTTAGGATCAGCTTTATATGCAGT  
CCCTTCAATTGATCCTCTTTTGCCATTACTCCAAGTTTCATTT

>TCONS\_00035829

AGAAATTTGATTGGGGCCAAAAGCCCATTTCTTAGTGAAATTCTTGGGTCAAAGTTGTCTTGGTATTCCAAAA  
GGAGCTGGTATCATGATTTGTTTCATACATATCAAATGCTTACTGTTTATCCTCATGTTCACTTGGAAATGTTGT  
GTCTTCAATTGTGGTGCTGAGCATTTCCTGTTTATTTGATTCAATATTAAGACAGTTGATAGATTGATGCATGA  
AGCCTCTAAAAGAATTTGGGAATTTGATAAACTTGAGTTGGAGAATTTGAAATGAGCCATGTGGTGGAGAAC  
ATTAAGAGATTTGTTGGGCCAAGTTTGGAGACAGAAGAGAATTGAGCTTTGATTTGAATTGATCTTGGCCCAA  
AGAATAAATTTAAAGGTGGTGGGTGGGCTCACATAAGATAAGCTGACTCCTAAAATAATAAATAGTTTGTGA  
GGTTTAATGAGATTGTGGAGATGAATTGAAGAAATTGTAGTTTAGTTGCGTTAGCGGAGACTTTGCCTCTGGG  
TTCGTCTTTTGAATAGTTGAGACATTCATCTGATAGGCAGTTTGAGGGTTTCTACGCTTTTTTTTTTTAATTTAA  
ATATGAACTGGATGCTTTAAAGGCTTTACTAAATTGTTGGGTTCAATTTGTTTGATGTCCAAGTATGTTTGGCAT  
AATCTATGATTTTCAAATAGTTGGTACTCTGGCAACATGTACAACCTGATTATGTGTGTCAATTCTGAACCTAA  
TTTTTATACATGTTTCGGTAATTTAGGCGATGGTGAATTGAATCTTTATTGTCTCTGTCACTCTGTTTTCCTATTT  
TATTCACAGTAATTGAACATGAAAGTGATATTGTTATGAGTAGATTATTTGTAGTTTAATCTGAACTCCATGTG  
TTTAGACAACAATAATTGATAACCTCTATGTTATAGGAAGTCTAATTTTTATGTTTGGTTCAAAGACAAAATG  
AGTGATTGATCAAATGATGATGTTGTGGCTCACTCTGTTTTCTTTTACTGGTTTACAATTGTATTTAGCCAGTT  
CTTGTCTCAAGGGGCTTATCACTCTTCGAAGCCTAATGTCGTTTACCAATAATGCTAATTAGGAAGTATGAA  
CGACCAAGACTATAGGATCATGGTAACCACTCGGCAAGAACAAGTGCCATACTGATTTGAATGCTTTTGTAG  
TATTTTTCAGTTTATATCTTGAATATTTGATATATTAGCTAAGTTTTCTGGGACTGCTTCAAGTTTGAATAAGA  
TATAAAACAAGTTGCTTTAGCCTAGGAAAGTTGCGATTTTAAACCCTCTAGGTTTTCAAGTTTGTCTTCAATC  
CACAAGACTAGGAGACTAAAGAGGCCTCCAATCTCTGGCTTCTATGAATGCATTTTCTTTCAACTTTAGGACT  
TTAAGGACATTGATTTCTCTTACAATAGTTAGTTGCTCCCTCTAACCGGTTCCAGAGAAGGTCAGCTTCCTC  
AGGGTTTTTCAAGATATGAAGGTCAGCTTCCTCAGGGTTCTCAGAAGTATGAATGACCAAGACCACATGATC  
ATGGTAACCATTCGGCAAGCAAATGTCACAACCTTATTTCAATGCAAATCTCCGTAAGAGTGTTTTCAG

>TCONS\_00035886

CCGAACGTGCCAAAAGAAAATTTACTTTGCATGCTGTATCATGAGCAACGCCGATGGATATTCAGATAGGAA  
TTTTGGCAGCTCCATAAGTGAAGGATCTAACTCAGGAAGTGCCATATAAATGTCTTCTGTTAAGAAGGGAATA  
CTCAGATCATCATCCAACAAAAATGAGTTAGATGTTAGATTCTGAGAATCCTTGTTTAAAATCTCCCTCATCT  
GTGCGACAACCTCATTTGACACACTTTGAGTTCCATACTTGTATCCCAATACATGGTACTAATTTCGATATATT  
TGTCTGATTGTCAATGCCGGGCAAAGGTCCTGTCTTATCTCTTCCAGTGATTTCTTCCTCTTCTGATGAATTACC  
AGAAATCCAACAGCTTGTCTGATATAATTAAGTTTCATGCCAAGATGTACCTGCAAACCTCTTCTTTTGCATTGA  
CAATCCATTTTTCTAGTTCTGCCAAACCGGACTTCACATATTCTCCATTTGAAAATGTGCAACACTCTCGTCGG  
AGTAAAAGACTGTTAAAAAGTGATATGTTGATGAAGGAGAAAACCTGGGTTGTCAGCTTGCGGATGAAAAA  
CGAAGGCACATGATTTCCGCATAAGCGACTCAAGAAAGAATCCAGAAATTTGATGATGCTATCCCACTGACT  
GCTTGGTGCCTGTTGAGGGATACCACCAGGTGATCTAGTTGATTTGCCTCCATGCACCCGTTGGATTTTTGGTG  
CCTGAATGCACAGACCCAGCAACGGGGATATTTCTTCTTCAAATTATCACGAATCAGACCAAATATCTTCTC  
TACACATGCAGTTAATTGTTGTTTAAACAGTAAAGCTGGATATCTTGCTTCCATATGTGACATTCCATCCTCCG  
ATCCAATAAATTTCAAGGGCGACTTTAAACTTTGTGCGACCCTCCCATTTAGTGCAGAACCGCCTCCAGAACC  
CTGAGAAGTACTAAAGAATCCATTCGCCCTCAAATTTCTTTGCAGAAGACAGAGAAGTGCAGATGTATTCGA



TAACCAATAAGGCAATGTGACAGCCTCATCTCCGACCTTCAAACTTCATTGATACCCGCAATGATAAAGTC  
AAAAATAGCAGTCCTCTCTGACTCAAAGGCATGCCAGTGAAGGAGGCACCTGTAGATGACACAAGCAGCAA  
CTGGCTTTCCATCTTTAAATCCCAAATTCTCTTTGATACACCGTGAAAGAATTTTCAGAGTTCTCCTGCTGCTTTT  
CACTGGTCAACTTAGCTCTACGCGAATCAGAAAATCCTTGAGCAAGAGGTGGTATGATTTTTTGTGGAGTGGG  
AGATTCAAATGAAGATTTACGATCAGCAGAGGGCAGAGCGAGTGCACCAGAAAATTTATCGACAAAAGGCT  
TGGCAAAACCAGCACGATTGCTCCTCGGAGTTACACCCAGTGCTTTCTGTCGGAGGATATGATTTTCATCCTCT  
AAATTTGAGAGCTTCTCTTGACATACTTTTTAAGTTTTGTGGAGTTGTGAACATGTTTCTCAACTGCTGTCAGC  
TTGGAAATTGTGTCAGTAGACTCTTCTTTAGCCTTTAGTAGCTCATGCTCCAATGCTGAGTTCTTTTCTCCAAG  
GCACTCAATGAACCTTTCAGAAATGTATTTTCATTTCTCAGCTCAGTCACTGAAAAAACTTCTCTTTCCAAAGC  
AGCTTTCTCCTTCATGGATAAATCCAGTTGTCTTTGGAGCACAGCATTCTTGTTACCTCATTGACTGCAGCCA  
ACTTTGCTGCATCTAACTCAAGGCTTAAAGATTCTACAGTCTTGTGAAGTTTTGAAATTTCCACTAATTTAGCC  
TCATCATTAGATAGCCGCAATTTTTTTTTCTAATTGCAACCTCCAAGTGAGATCCTCCAAGTCTTTTCAAGCTT  
GGTTTTTGCTATACGAAGGGCACCAGCTTCATTAGCTTCCTGTTTGAGCCTTCTGAACTCTCTTCTTGCTATTTT  
TCGCCTCCAAAGACATTGTATAGAAATAATATTGGACTGCCGATGATGAAACGCTGATCGAACTTGCACAT  
TCTCCAATGAGCCTGAATGATAGTAGCAGCCTTATTCTCCTTCCTGTATAAGAAGTCTGTGCGAGCAGCAAAA  
CCACGAACGCAAGACTGTATCAGCAGAGAAGAAGCATAAAAATTGCACATAAGCATTCTCAAGATCCACTT  
CCGCACGTATTTCTGGATTATGATCGCAGCTGATGCTTCCTGCAGTGCAGCATATAAATTACGAGCAAGATAA  
CCTCTGCAGCAAGACTGCAGATGAATTGCAGCCAATCGGTTTGAGATGAAGTCTTGCCTGCAAGAAATGTA  
CGTAGTCGACTTTGTATTTGCTTCGCAGAAGAGTCCAAAATCTCAGCACGACGTGAGTCTAAAACACCAATCT  
GGCCAGCCCTAAGGAACACTTTTGTCTTTCCCAACTGATAATTCCCGAGCTTGAGTTTCTGCAGTATTTTCTCT  
GTGATGGTTTTTTCATCATTACTTCCATCCAACATGTCTAAAACAATCAGTCCAAATCGATCTATAAATTCATG  
GTAAGTTCTGCGTGTGGGATAACCTGCCAACTTATGCGCACAGCCTCCAGAACACCCTTAAACCGAGAAGC  
TACTGAAGAGAACTTGTATGATGACCTAGACGATTCTTCTCCAAGGGATGGAAAGAGACCAGCAATAAAAG  
GACACTTCGAAGAAGATAACAGATTACGGTGTCTACCACGACATAATCACGATTTTTATCTAAGAATGCTTC  
TGTCTTATATGTGACCTA

>TCONS\_00036016

TCTTAAGCAAGGCAAATCTCTGACAATGGCGCACTCTCCAACATCGTAGGTCTCCCGTTGATTTTCTTCTATGT  
CTAGTAGAAGGTGCAGCAGGTTATTCCGTCACTTTCAGTTGGTAAATCAAAGGTATGGCCTTCCTCTCGCTTTT  
GATAAGTTATCTTCTTTAACTTTTTGGAGTCAAATTTGACACTGATAAAGGGAGCTAGAAAATGGTTTTAAAA  
AATTAGGGTTTTGAGATTTTTGGCTACTTATAATGAATCAATCCCATAATTATTGGGTGAGTTTGTGATGAAGTT  
TCCCACAAGGTGTTTGACGCTTTGCCTCAATGAATCTCTG

>TCONS\_00036046

GGTTTATAATTGCTCCCTTTATTTTCTAAATTCCTTTCATGTCTTCTTCTTACCATTACACTCTCTTCAT  
CCCTTCGCTCTTCATCTTCATTACCTCTCCTTCTCCATCGCCATCATTTCAGCGTGCTGTGCTGTCGTCACCTGT  
ACCTGCCGCAAAAGCAGTTAACTTCGAGGCATCTGCTGCGTCGCTGTTCTATTAATGCAGATAATAGTGTAAC  
TGCCTCTTCTCTTTTCTTTTGTGTTTGTGTTAATTTATTCGCTGACTTCATCT

>TCONS\_00036067

TTACATTAGAACAGAAGGAGGCTAACAAGAGAATCAAATATCCTCGTTTATGAGTCACTAACATTATTCTCA  
AACAACTAAATAACTACCAAGAACCTTAAGTTAGAAGTACAGATTGGAAGAATGATCAAGAAAAGGAATTT  
TCCTCCCAATGCTGGACCATTTTTTGTCTATTGACCTATAGAGCTTAGTTTTCCAATAACACCTCTTTGCAAGTT  
GACTTATTGTGGCCTGTACCCTTGATCTACTGCATTGGAGTTGACGCCTAGTTACTTCATGGGAACCCACCTT  
CTTAGTAGTTGGCCGCCCTGGTGGACGACGGGTGGGAGGAGGGTTTACTGTTACAGCAGCTTGAGAAGCATC

CTTTTTTTTGGGCCTTTCTAAGCTTGAATTGGATGTATTGATTCTGAATATGTTGATCTATAACTATCAGCAGT  
 AAAGTATCTGGCACAATAGTCGTATGGATCACGGCCAAGGCAAACCATGACAGCTATTGCGTGGCAACAAG  
 GTAAACCAGTTAGCTGCCAACCTCTGCAAGTACAATCCCAATGGTCAACATCAACAAAATCTACGGTATCCC  
 CTCGTACCTCAAATTTGGTACCACTAGATGTCAACACTTGAAGAGAACTAATATTTAGGCTTTCCTTCTCTAGC  
 CTTTCCTCCATAGATGGAGTTAGCCTCGTCACCCACTGATTGGACTCATTCCGCCGGGTATAAATGAGCTCCA  
 TAATCTTACCCCTTATTGCATCAACCATCTGAGTGATTGGCAAGTCATGAGCATCTGATACCCAACCATAGAA  
 AAGCTCTCCAAAGTTTGATGTCTATGTGATTATATCGCATCCCACGGAAGAAAGCATTTGCCCAATTAATAGGC  
 TCACTTTGCATTACCCAGTTGTAAGCATCTACTGAAATACTTTTTATGCTATCAACACACCTCTGGAAGCCGTC  
 AGGCTTTGATGCATAAGCTGCACCATAAAAATCCTCAACCAAAAGGCGCTTGACTTCATGAGAAAATTGGCC  
 TCTCACATCTCTGATAAGTTGTTTCTAGAAAGATAGCGTAGACAGTATCCATGAAAGACGTCCTCGCCCTGAAAT  
 ATTCAGCAATTGATTCTCTAAGGCCCTTCTCTCTATCTGCCACAAAAGTAATACCACGACACATTGACAATG  
 CAGTTCTAAGCTGTAATAGGAACCAACTCCAGTTATCATCAGATTCAGCGTCTACTATGGCAAAAGCAACAG  
 GAAAAACACCATCATTCCCATCAGCAGCTGTTGCTGCTAACAGAGTGCCTTGGTATTTAGACTTTAAGAATAT  
 ACTATCAAGGAAAATCAGGGGCCTGCAGCCTTGTTTGAAGCCATAGAGTGAAGCATGAAATGATACAAATA  
 GCCTATGAAAGCTTGAGTCATCCTTTGTAGTGAAAGTTGCAAGACTTCCAGGATTTGTCTCCATCACTTTTTCA  
 CAAAAAATGGCAGCTGACTATATGCCTCCTTATACGAACCTTGAAGCTGCTCTTTAGCAATCTCTTTTCCAC  
 GCCATGCCTGGAAATAATTTAACTGGATGCCGTATTCCTTTTGTATGTCATTGACTATGTCCTTTGGCTTGTAAT  
 TTGGGAAAACCTTCAACTTCTCCTTTATAATACTAGCCACCCAACCTCCTCGTTGCCTGATATCCATTAGTAACA  
 ACAGCACCTTCACATGTATGTGTAGGATTCATTTTTTTAATGCAAATCAATTGGGTGGTTGACAATCTTGATGC  
 ATGAATTCTCCATGGACAGCCCTCTGCTTTGCATTTTACAGTAACTCGATGACTATCATTCTTCTTGTACTTGAA  
 AGCAAATTGATTTGCAATAGCATATTTTCGAATGTCTCACGAAATTCATGTACGCTATTAAACCTTTGACCC  
 ACACCAGTTATATCATTCTGCCACTGCTGAGCAGCTTTAGCATTCTTGTCTGTCATAATTAGCGGCAACAAATG  
 AAACAGGAACAGGCATTTAGCTTCTATCCCAATTGTGTCTGTCATGTTGTTTGTATCACTTACAACATCAAA  
 ATTGGCATCAAGCAAGAGGCCAGGCTCGTTAGGGTCATCCACGATATCCTCCACGACACTAAGAGGAGCGTC  
 AACAGGGATCGCCATTTCTGATAAAGTCGTTTCGGCTTGACCTACTGCCAGGCATGTTTGAGAAATCAGGATCA  
 ACAGCTTCTTCAGTCATCAGATAGATCTCAGCAGAATCAGAGTCACCATGGAATTTGATCATGCGCTTAAGGT  
 CTTTGTCTATTGGAGATTGTTATAAGTGTCTTCTGTTTCCAGGAAGAAAATATTTAACTGACATGGTAGCAAG  
 GCTGAAGTTGAACATCTCAGCTACCTCCATCTTGAAATCATTATAGTTTATTTGTCTATCCATTTCCATAGCAT  
 GAGCATCTCCGCCTTTATACGAAAGGAAACCATCTTTATCAGTCTCAAATTCACCACCTGACTGACATATGGC  
 TATAACTCGCTTCCAGCCATGACCTTTATGCCTGGGAGATGAAATCTTGAAGTGGGTATTCAAGAATGGCAC  
 AAAATTGTTACTACCTGCGAATTGGAAAAGGGCAATAGAATGGGAACCTGGAATCTGCATAAAAAGGGGAA  
 TGAGGGATTTGAG

>TCONS\_00036068

CAAGAGAATCAAATATCCTCGTTTATGAGTCACTAACATTATTCTCAAACAATAACTACCAAGAACC  
 TTAAGTTAGAAGTACAGATTGGAAGAATGATCAAGAAAAGGAATTTTCTCCCAATGCTGGACCATTTTTTGT  
 CTATTGACCTATAGAGCTTAGTTTTCCAATAACACCTCTTTGCAAGTTGACTTATTGTGGCCTGTACCCTTGCA  
 TACTGCATTGGAGTTGACGCCTAGTTACTTCATGGGAACCCACCTTCTTAGTAGTTGGCCGCCCTGGTGGAC  
 GACGGGTGGGAGGAGGGTTTACTGTTACAGCAGCTTGAGAAGCATCCTTTTTTTTGGGCCTTTCTAAGCTTGG  
 AATTGGATGTATTGATTCTGAATATGTTGATCTATAACTATCAGCAGTAAAGTATCTGGCACAATAGTCGTAT  
 GGATCACGGCCAAGGCAAACCATGACAGCTATTGCGTGGCAACAAGGTAAACCAGTTAGCTGCCAACCTCT  
 GCAAGTACAATCCCAATGGTCAACATCAACAAAATCTACGGTATCCCTCGTACCTCAAATTTGGTACCACTA  
 GATGTCAACACTTGAAGAGAACTAATATTTAGGCTTTCCTTCTCTAGCCTTTCCTCCATAGATGGAGTTAGCCT

CGTCACCCACTGATTGGACTCATTCCGCCGGGTATAAATGAGCTCCATAATCTTACCCCTTATTGCATCAACC  
 ATCTGAGTGATTGGCAAGTCATGAGCATCTGATACCCAACCATAGAAAAGCTCTCCAAAGTTTGATGTCATGT  
 GATTATATCGCATCCCACGGAAGAAAGCATTGCCCCAATTAATAGGCTCACTTTGCATTACCCAGTTGTAAGC  
 ATCTACTGAAATACTTTTTATGCTATCAACACACCTCTGGAAGCCGTCAGGCTTTGATGCATAAGCTGCACCA  
 TAAAAATCCTCAACCAAAAGGCGCTTGACTTCATGAGAAAATTGGCCTCTCACATCTCTGATAAGTTGTTTCAG  
 AAAGATAGCGTAGACAGTATCCATGAAAGACGTCCTCGCCCTGAAATATTTTCAGCAATTGATTCTCTAAGGC  
 CCTTCTCTCTATCTGCCACAAAAGTAATACCACGACACATTGACAATGCAGTTCTAAGCTGTAATAGGAACCA  
 ACTCCAGTTATCATCAGATTCAGCGTCTACTATGGCAAAAGCAACAGGAAAAACACCATCATTCCCATCAGC  
 AGCTGTTGCTGCTAACAGAGTGCCTTGGTATTTAGACTTTAAGAATATACTATCAAGGAAAATCAGGGGCTG  
 CAGCCTTGTTGCGAAGCCATAGAGTGAAGCATGAAATGATACAAATAGCCTATGAAAGCTTGAGTCATCCTTT  
 GTAGTGAAAGTTGCAAGACTTCCAGGATTTGTCTCCATCACTTTTTACAAAAAAATGGCAGCTGACTATATG  
 CCTCCTTATACGAACCTTGAAGCTGCTCTTTAGCAATCTCTTTCCACGCCATGCCTGGAAATAATTTAACTGG  
 ATGCCGTTATCCTTTTGTATGTCATTGACTATGTCTTTGGCTTGTAATTTGGGAAAACCTTCAACTTCTCCTTTA  
 TAATACTAGCCACCAACTCCTCGTTGCCTGATATCCATTAGTAACAACAGCACCTTCACATGTATGTGTAGG  
 ATTCATTTTTTTAATGCAAATCAATTGGGTGGTTGACAATCTTGATGCATGAATTCTCCATGGACAGCCCTCTG  
 CTTTGCATTTTACAGTAACCTCGATGACTATCATTCTTCTTGACTTGAAAGCAAATTGATTTGCAATAGCATAT  
 TTTGCAATGTCTCACGAAATTCATGTACGCTATTAAACCTTTGACCCACACCAGTTATATCATTCTGCCACTG  
 CTGAGCAGCTTTAGCATTCTTGTCTGTCATAAATTAGCGGCAACAAATGAAACAGGAACAGGCATTTAGCTTCT  
 ATCCCAATTGTGTCGTCATGTTGTTTGTATCACTTACAACATCAAAATTGGCATCAAGCAAGAGGCCAGGCT  
 CGTTAGGGTCATCCACGATATCCTCCACGACACTAAGAGGAGCGTCAACAGGGATCGCCATTTCTGATAAAG  
 TCGTTCGGCTTGACCTACTGCCAGGCATGTTTGAGAAATCAGGATCAACAGCTTCTTCAGTCATCACATAGAT  
 CTCAGCAGAATCAGAGTCACCATGGAATTTGATCATGCGCTTAAGGTCTTTGTCATTGGAGATTGTTATAAGT  
 GTCTTCCTGTTTCCAGGAAGAAAATATTTAACTGACATGGTAGCAAGGCTGAAGTTGAACATCTCAGCTACCT  
 CCATCTTGAAATCATTATAGTTTCATTTTGTATCCATTTCCATAGCATGAGCATCTCCGCCTTTATACGAAAGG  
 AAACCATCTTTATCAGTCTCAAATTCACCACCTGACTGACATATGGCTATAACTCGCTTCCCAGCCATGACCT  
 GCGAATTGGAAAAGGGCAATAGAATGGGAACCTGGAATCTGCATAAAAAGGGGAATGAGGGATTGAG  
 >TCONS\_00036088

CCGCCGTCCAATGCTCTTTCCCAGGATTAGACTGAAATCTGCTAACAACGGCAACGACAAAGCAGATATCAG  
 GCCTAGTGCATAACATAGCATACATGAGGCTCCCCACAGCTGATGCATAAGGGACCGCCTTCATCTTTACTAT  
 CTCTTCATCAGTCTTAGGAGACTGATCTTTAGATAGAGAAATTCATGTCTGAAGGGAAGAAATCCTTTCTTG  
 GAATCATGCATGCTAAACCTGGAGAGTATTGTATCAATATAAAGACCTTGGGACAAGCCTAATATCCTTTTCT  
 TGCGATCTCGCAAGAGTTTGATCCCAAGGATATGAGCCGCTTCTCCCAAATCTTTCATATCAAAATGTGTGGA  
 CAACCAC

>TCONS\_00036156

AGAAGGAGATATGCAGCCATTAGGCACGAAGTCCTTTCTCCAGCTCAGGTATTTGAGGAACATATTAGAAGC  
 CTTTTCAACATCTAGATCTCGAGCTCGTAAAAATCTGCGAATCATCTGATCATCCACACCCTTAGCGGAGGGA  
 TCTTCTTTCTGGACAAGGGCTCTCATGATTCCGACTTTACTAGGCTCAATCTCTTCAGTTTCC

>TCONS\_00036157

TAGTTGGTCATCATCAATGTCTCGCAGAAGAGTTGATCTCAATTTTTTGTGTTTCAACAAAAATAATCTTTTTCTT  
 TGTTTTGCTGTGCGATGAAAGGGTAAATAGCTTTCCATGCAGTCATAAATATGTAAGGGACATGGACTATAAAT  
 AGCTTGCTTAGCCGCTCAGGGTAGCAGTCCTGCAATATTGAAAGAGCAGCTAAATATCCACGAATATCGCTA  
 TTAGCATATCCCCATCCTTCCAGGTCTCCAATGGCAACAACTTCTCTTGCTCATTGTCATTGTCATTCTA

>TCONS\_00036172

GATCTCACTGTCCTATTTCTTTCACCATATGAATCATCATCTTCTTCTTCCTTGTTCTCTTTGATGATTCCCTTTCTT  
TAACAGAAGACCCTCCAGAGTCCGTGTGCTGAAATCATCTTTTCTCCTCCCAAGTCTTGAAAACCAACCAGCCTA  
TCTGAAGCTACTCCATTCTCTGAAGAAGATGACACATGGTAGAGTTTTAATTCCCAGCTTTGTAACGAAAAAAG  
GAGCATTCTCAGCATCCAACCTTTAGGAACTTTGTATCGACGTGTCTTGGTGCAAGAGACTTCAAATGCTTATC  
CATGATCTTGCAGCGATAGAACTCCCGATGGTAGAAGTGACAAATCACTTTTCTCACTACCAGTAACTTCACCC  
AAAAAATCTCCTTCACTAATCTCTCTATATTCTCCATGCCCTTGCCTTTTTAAAGCTTGTCGCTTCTCTGCTTCTT  
TCTTGAGAGCCGCAATCCTATCTGCGTGCAATTTTTCCAGCTCAGGGTCATCCATCAGTTCATCAAGATCTATG  
TCTTGATTAAACAGAAGATGATGCTTGTGCCTTCTCTTGAGCCAGCACTTCCTTCTGGTAATCACGAGCAGCAG  
CAGCCATTACATTTCCAAATGCTAAATTAGAGAGAGTTGATTTCACTGAATCCGGATCCATCTCCTCTCCTTTT  
TTTT

>TCONS\_00036173

GATCTCACTGTCCTATTTCTTTCACCATATGAATCATCATCTTCTTCTTCCTTGTTCTCTTTGATGATTCCCTTTCTT  
TAACAGAAGACCCTCCAGAGTCCGTGTGCTGAAATCATCTTTTCTCCTCCCAAGTCTTGAAAACCAACCAGCCTA  
TCTGAAGCTACTCCATTCTCTGAAAAGCAAAATCTTTTAGGTGTAGAACAAAAGGAAATGACAACTGTACCC  
CTTCCCTTTATCCACTGTTTTGATGAGGCCACAAGTTTGTAACCTTTAAACTATGTTTGTGAAGATCACGATAGC  
TCCCTCATCTAATTTACAATAAAATAGGGCAGCTCCCTTGCCTAATCAAATCCAAGACCTGAAGAAGATGAC  
ACATGGTAGAGTTTTAATTCCCAGCTTTGTAACGAAAAAAGGAGCATTCTCAGCATCCAACCTTTAGGAACTTT  
GTATCGACGTGTCTTGGTGCAAGAGACTTCAAATGCTTATCCATGATCTTGCAGCGATAGAACTCCCGATGGT  
AGAAGTGACAAATCACTTTTCTCACTACCAGTAACTTCACCCAAAAAATCTCCTTCACTAATCTCTCTATATTCT  
CCATGCCCTTGCCTTTTTAAAGCTTGTCGCTTCTCTGCTTCTTTCTTGAGAGCCGCAATCCTATCTGCGTGCAAT  
TTTTCCAGCTCAGGGTCATCCATCAGTTCATCAAGATCTATGTCTTGATTAAACAGAAGATGATGCTTGTGCCTT  
CTCTTGAGCCAGCACTTCCTTCTGGTAATCACGAGCAGCAGCAGCCATTACATTTCCAAATGCTAAATTAGAG  
AGAGTTGATTTCACTGAATCCGGATCCATCTCCTCTCCTTTTTTTTT

>TCONS\_00036194

CAAATGTCAGCTAACTAACAGATTTGACAGTGGCTATAGGAATCAAACAATTCCAAGTGACTACACATGGAT  
CAACTTCTTGAAACAGTACGTGCCCAAGAGAAACCAACCAATAAGAACAAACATGAAAATTACCAGGTACA  
TAAGGAAAGTCCCTCCTCCAAATATGAGTCCTAAACCAAGCACAACGAGAGCGGGTAAATAGGTTTTAACA  
ATAGATGTTTTATTTACCCAACGTCCCTTGAGGAAAATGAAAATGGCCAGGTTGACTACGTTCCATCCACCAG  
TCTGAAACCCCAACCTGTTTAAACCATTAGCTACAAAAGAGTGGCAGTTGCAAGTGAAAATGCTGTAAGACA  
GGTGTGGAATTCTTGAATGCTCTTCCTCAAGGCAGCATCCACGTGTCCACATGGCTTGCAGATTCATCATCG  
TTCTGGATATACTCACTTGTATGTTTCAAGTGAATAAGGAGATATGCAGCAGCATTGGAAATAGCGAGTTGGTG  
CCCCAAATGTGAAATTGTCTACAGAAACGAAGTTTGCCCTGCAAAGTCCAAGATTATGCCATCCTCCCTAC  
AAATCCCTATATGCCCAATAAAGGGGATAAACCATGACAGGACAGGAAGTGGTGACCATACGATGCAGCAT  
GGAAAGCGATCTCTTTTTGGATCAACTAGCATGGTATCCGCAAAATTATCTTCAATCATCAGAGCATGATCTG  
GATCTACCTCAGGTGCCATTACCAGAGCTTAAACACTGGATCACAAGAACAGAGCACCCAAAAAATATTAC  
AATTCATATACGAATGCATTCACGTATGTCTAGTTACAACCTTATGGTCTACACTATCCAAAAACATGTCTCGC  
AGCAAAATCAAGCTCTTACGGAACACAACAAACCAACACTGCACCGTGCCAGAATACACACAGCTTTAACA  
TTCCATCAGCATGATAAATACATTTCCCCACATGTCCAGCAACAAAAGATGTAATGTGCTCAAAGAGTTGCCT  
ATCTTCAAGAAAGTGTTCAAGCTAATTATCTCAAATAAGTCAAAAATCCTGCAAAGCGTCACTAGAACTAGC  
TTGAAACATGAAACGAGTTTCTTTCAGCTAGTACATTGAACCCTCTTTTGAATTAGCAATGGTATACACGTAG  
TGCTGGAATAACTGTCACTGGTAAAAGAAAGTGCATATGTAACCTACAAAGAGTAGAACTTGCTACAGGCAC

TAATAAATTGTTGAAATGTATGAAAGAGGGTTCAGTGGTTTGGCAATACCAAATCAAGTGTAGAAGCAGAGGCTGATC

>TCONS\_00036210

ACTATTTACCAAATACCTGCTAAAAGCAAAATTATTGTCAACAGTAGATGCATCATTGACATTTTGAGAACA  
TCATTTACATAAGTCCCTTAAGCATTTCAGATGTTTTCCACCTATACACCTTTCAAGAACAGCTTCCATCCCA  
TAGTACAGCAAATTGTAAAAACACTTCCACTCCATCTAAGGATAATTTATAGTTGAAAATAGGCAAAATCCA  
AAGATGCTGGAAACAAAACCTTAGAACTAAAATCGCCAAGCAGGGTAATTCGCTTCATTGTTCTCCTCGTAG  
GGAGCTGTCGAGCTGCTTCCTCCTCTCTCAGCATAATTGCCTGTGTTTTGGTTGGACGAGCGAAAAGGCCACA  
AAAATGAAAAGGGGTTCTCCTCCCCTGGTTCTGACCGGTATTGTCCCTGCCGCTATTGTTGCTGCCACTGCTA  
ACATTTCCAGTTCTTGAACCTCAATTGGTCGGGGCACTTCCAGAAGGTCGCGAAGGAAGCTCAAGGCGGCAA  
ACAGGGCACGAGTTGTGCCGAACCAACCAAGGTACAATACAATCTGCATGGTAAATATGCTTACATGGCATC  
TGCCTTGCTTCAGAACCCAATTCAAAGTTATCTTGACAACTGGGCACTGAGAATCCGTGTTGAGGTGCCTCT  
GTGTGATCTTGACAGTAGGCAAAGCATCTATTGCCGAACGAGGTGCCGGGGGTGGGCCCTGCCTATCATTCAT  
ACTGAGCTGCTCAATCAACTGTTGCAGCCCAGGCCCCATTAAATCATCTAAATTAGGTCGCCGCTGCCCCATT  
CCCGGACTTCCATTGAAGAAGTACTCAAATGCATCATTTTCCGTCATACTAACAGGAGTTTGGCCGTGAAATA  
TCAACCATGGACCAGAACCGAAACTCCTTCCTTGTCAGGAACAATGCCAGATCTTGTCCTAATGTCAAAGTT  
CGGGTTTCTTCCTGCCATTCTCTGCCTCATGAATTGAGCAAGGGCGTCCATTATACCAAATCTTGGGTCCGGGA  
AAGGATCCATTAATCCAAAATGAGGATCATCCTCAATAGTAGATCTAGCACCTAGCATGTATCAAGCTCTTC  
AACGAAACCTCCCCCACAATTTGGGCAAAGACAGCTAGCCCCCTCGAGGCCGAATTGGTTGCCTGCATCTGTG  
GCACCAGTGTGTGTAGCTCCCACTCGACATCTCTTATCAGCAGTTTCCAAGAAGATGAGCTGAAGATGAAGG  
T

>TCONS\_00036254

AGTTCATATTTTGCCCTCTGATCAGGAGAAAAGAGTCCAAAGTGTTTCTCAGTGATATCTCCTTCCTTATTATT  
TTCATCAAACATGGCAAATAAATAAGTTTCTATAGTCTTTCCAGGTTTCTTTGGAAGCCCTGAATATGTTGCAG  
TTGAGACCTTGATTGATCTTGCAACCCTGCTGCTGCTAATGCATTGTACACATTTTGCATGGCAGGAGCAAC  
AAATGGTGCATATTGACCATTATTTCCGGGAGAGACTTCATTTCCAACAGCTATATATTTAAATTTAACATCTG  
GAAAATGATTTATTATGTTATCTTGACCCATCCATTAGCTCTTGAAGAATCAGTTAGGGATTGAAGATCTTG  
ATTTGGGACGTCGAGAATGATCTCAATGTTACTT

>TCONS\_00036304

ATAAAAATCACTTTGGTGAGCCAAGTCAAGTACCTGATGATCTTGATATGCTTTTAAAGACAGATCAGAAAC  
CTCTTTCTTGTCATTCACAATTTTGAACCTGCAAGGTATCGATAATAATCCCCTTTCAATTTGTAGTAAAACAC  
AGTTGATTCTCCAGAAGTACATGATGGAATAAGATGCTCATCAATAACGGTCATGATATTATTGCAAATGTGCG  
GTGAGCTCTGACTCCACATTTTGCTGGTACTCCTTAATCCGCTTCGCGTTCTGCTCATTCTCTAGACTCTTCCT  
TCTGCTCGATGGAAGACAAGATCCTCCACGATGCTCTCCTAGCTCCAACCACATTCTTATAACCAACAGAAA  
ACAAATTCCTCTCTTCCACTGTCAATTCAACATCCATATTTGCAACATTCTTCATCGCATCGACCATCTCTAGG  
GGATATTCTGCCTTGAAAAGAAGACCACAAAACCTGCTACTATTCTGCTT

>TCONS\_00036434

GTCGATGTGAGCTCTTGGAAGAAGATCGGCCTGCTATCCCTAGAGTAACTTTTATCCGTTGAGCGACGACCCTT  
CCACTCGGCATCGTCGGATCACTAAGGCCGACTTTTCGTCCCTGCTCGACGGGTGGGTCTTGCAAGTCAAGCTCC  
CTTCTGCCTTTGCACTCGAGGGCCAATCTCCGTCCGGCCCCGAGGAAACCTTTGCACGCCTCCATTACCTTTTG  
GAGGCCACGCCCCATAGAACTGTCTACCTGAGACTGTCCCTTGCCCCGTAGGTCCTGACACAAGGTTAGA  
ATTCTAGCCCTTCCAGAGTGGTATCTCACTGATGGCTCGGCCCCCTACCCCCCCCCCCCCCCCCCGGAAGGAGGC

CATCTTCGCCTTCCACCTAAGCTGCGCAGGAAAGGCCCAAAGCCAATCCCAGGGAACAGTGAAGCTTCATAG  
GGTCTTTCTGTCCAGGTGCAGGTAGTCCGCATCTTCACAGACATGTCTATTTACCGAGCCTCTCTCAGAGAC  
AGTGCCCAGATCGTTACGCCTTTC

>TCONS\_00036449

TATTAATTCTGTAAGGGACGCCTTATTCTGCACTCGGGTGGTCCGATGAACAATTCAGTCTCCACATCTGATTT  
TTCACTACTCTCTGTACAAAGAGCTTCACCTTCCTTTTCTCCACTTGATCCTTGTCTCTGTTGAAGGTCACCAAA  
CTAGAGCTGGCAAATTCATAGAGCTTTCCTCTTGGAGAAAAAATAACCAAACCAACCTCAGCATCACAAAGT  
ACTGAAAGTTCAAATGCTTTCTTTAGCAAACCATTTCTGCGTTTAGAGAAAGTAACTTGCCTGCTTGTGCGGTT  
CTCTATACGCCTCATCTGAGTTTTTCTCTCACCATCTTTACAAAATTGGCAAAAAATCAGGAAGCTTTTTGGT  
TGCAGGTATGAGGAAATATAGAAGTGAAGCTAAAAAGGGGAAGTCCCAAATCTGATGTTTGTATGTGGAAG  
AACAACCTGAAAGGGTAATAGGTGCAAATTTTGCTCTTTT

>TCONS\_00036601

GCCATTCATCTCTTTGAGAGCAGTATTTGCAGCCTCCACTGTTGTGTACTCAACAAAAGCATAACCTTTTCGACC  
TCTTGAAATTTTGTCCATTATGATTTTAACTTCAACAAGTTCACCAAAGCCTTCAAATGCTGCACGCAACGTT  
TTCTCAGATGTATAGAACGACAGACCAGTCACAAAAAGCTTCTTGGTATAACATTTGTT

>TCONS\_00036768

CCATTGCGAAGGTCCGAGCAATGCCGTGAACAATAAGATTGGTTATGTTGCCAATTAAGTAAGCAGTGAGGC  
CAATGTTGAAAAGCATGTAGAAGATGGAGAAAATCTTCTCTCCTGTATTATGTGCACGAAGATCACCGTAGC  
CGACTGTTGTATTTTCTGCAGTATGATAATGAGTTGCTAGCCAGTAATATAAACATCCAACGGAATGCACTGC  
GAATAAGGTCACCTATGACAGAGTTATAGCCATAGGATGGAC

>TCONS\_00036773

GCACTTTCTCTCTCCATTTTCCCCATTTTCTCAGAGAGAAAGGAGATTACCTTTAAAGTCTTTGATTGATCTCTA  
TCTTCGTTTTTCCCGGCGAAATTAGGGTTTGAATATCGCTCATCGATCTCTATTCTCGATTTCCAAGATTGGATC  
TTGCTGTCTTGAATTTTCGGTATTCTTATCTGCTTGAGCTTTTTCTCAATCTTTGGATCTGATAGGTGAATAGTG  
GATACTTGGTGGAGATGTA

>TCONS\_00036784

AGGTCTTCTCTATACACCGGAGCCTTTACTTTATACTTTAATTTAATATTTAATCAACTAATTGATGTTATTGGG  
AACTTGTATAGTTCACACTCTTTGGCTCTACCCATGAATTATCCAGTAATAGGTCTTTCACAATCAGATCTACC  
TATACAGTAACGGTATTTAATTATGAAAGTTTGTGCGGTAGCTGACCCTCTTAGTCCGTTCTTGCCAGAGTGGG  
AGCCTGCCTAATCTTTATGTTTTATGCTTTTTAAATAAGATTTCCTCCGCTTAATGGATAACCATTTGTTACCAA  
TGGAGAATTTCTTATCATCTTAAATTCAGGTGATTGGATTTACACCAACGGAAACCATAAACTTCATACACAA  
TAGAGGGATATGATAGAGTTTTTTTTTAATAATGAATGGAGTTCCTTCTTCCATCCTATCCCATTACCCGGTAC  
TGATCATTGATACTGTAAAAGTCGTTTTCTTGCTTTTGTGCCAGCTCATGATCTAAACGAGTCGCACATACACC  
CTAGTACATGTTCTCGACGCTGAGGGCACCCCGAAGAGCGGGGGATTTCGTGACATTTCTGATTGGCTGTC  
TTGTATTTCTAATAAGTTGTTTAATAGTTGGCATGTTGAATCGTATACATAATATGATGGGTTGGTTTAGATTG  
ATCCTAACCGAATGATGATGAATTACTTCTATTTACTATTTAATAGAATATTCAATTCGAAGATAAAATCTCA  
AATCACAGATTTGCGCGAAATCCATGTTATTTTCATTCAACCGCTACAAGATCAACAATTCATAAAGCTTGGG  
CTTCTGTTGCTGACATAAAAAACATCTCTTTCCATATCTTCGGATACAACCCATAAGGGTTTCCCCGTTATTTTTA  
CATAAACCCTTGTGAGGAATTCACGCAGTTTCAGCAGTTCTTCCGCTTCTAGGACAAATTCGCCTGTTTGTGCC  
TCATAAAAAGAACTAGCAGGTTGATGGATCATTACCCAAGCGTGAGGGAATGCTAGACGTTTGGTAATTTCT  
CCTCCGACCAGGATAAAAGATCCCATTGAAGCGGCTAATCCCATGCATATTGTATGGACATCTGGTCGCACA

AATTGCATAGTATCATAAATAGCCACCCCAGGTATTACCCAGCCCCCAGGAGAGTTTATAAACAAATACAGATCTTTGGTCTCATCCTCGATACTGAGATATACCATAAGACCAATAAGTTG

>TCONS\_00036812

GCACGATCACGCCAAGAACCTTGTTGCATTGCAAGTGCCTGCCCCGCTGATGAGACTTGTGGCAGGAGCAGTTTCAGAGATGTCTTTTTGCCATTATCCTCTTCTGCTTCATAATCAGTTTCGGTGGAAGGTGGAAGTGGCAGAAGTGAGGGAAGTCCAAAGATAGCCTCATCATGAGCAGCCTTGATTTGTTCTCCTCCCTCCTAGTCTCCACCGCAGAAACCGAAAGCTTTTGCCAATGTGGTTGACTAAAGCAACATCATCTTCTGCAGCT

>TCONS\_00036836

TACCAATGCTCCCATATCCGTATATTTCTCTAACTATTCATCTGAGATTTCAAATCTGTGATAATGGACTGTAAAGCACCTATATGACTACCAAGTAGATGCAACTCATTCTTGGATTGCTAGGCTGAAGTTTCTTTATTGGACTGTGATATTGTATCCTCTAAGATCTTCAAGTACATTGTTATTTGTTATTGAGGCTGAGATGATTTATTTGCTTATTTAATTTTTTGCTGCTACGTTGAACAGACTCCAGCTGAAAGAGTCAAAGCCAAAATGAACTTCAGCTTTCAGAACTGCTCGAAAAGATGAAACAAAAGGCATGGGCTCTGGATGGGAGCGTTTTGACTTCGACAAGGATGCCCCTTTGGATGAAGAGGAGATCGAAGGTAAGCTATTTGGCT

>TCONS\_00036852

AAACACAAGTAGCATATATATGTATACAAAAGTCACTCAATTTTCAATAGTGAGAACTTGTGTGTATGCATTTGTGGCTTTAGTCATTCGCTGCTTCAACTGTTAAACAGCATACAACCTTATCACCTGATCTATCTTGGCACGACAGACGGGGCAGCCCCACTTCTTTCCCTTGATCTCATTCAAACAAGACATGCATCCAGCCATGTGGCCACAAGGGATGCAAGCTCCTTCCACTGGAGCATCTAAGCATATTATACAAGATGAAGAAGCACCATCAGGATTACTGCTTTC

>TCONS\_00036857

GCTGAAATATAATATTTAGGTCTCACAAGACTATCCCAGAATCTTTACATAATACACGCAAAAAATAACTGAAGTTGTGTTCAAAACAAATAAGTCAATCTAGATATATCTTACTAATGGATCAAAACCGATCTTTTCTTTTACGTGCTGTGATTTGCTATCTGGAGGAAGTGCCTTCCCTTTTTCTCATCTGTTCTTTCTTCTTCAGAACCCAATCCCTCCCTTTGCCTTTCTTGTTCATTTTTTGCTTTTTTCTAGGTCTACGCCGATCAGATATGCAAAGTGTCTGGTTTTCTTCATCCTCGCTGCTGTCTTCATCAGAGCAACTCTCTCCATCTTCACCTTTCCATCTGGAGTAGTGGTGCTGAGAGCGGCGGACCACAAGTCAGAACTAAGTACTCTTTCTCCTTTTGAAGTGTGTGGGTAGTCAACAATATTCCTCCAGAAAATCCAGCTCGCATGGCAAAACCCAGAATCAGCTCCCGCTGAGCAAGATTTTCAGGATAGATCTGGAGTACTGCTCTTGCTCCCCTTCCCAAAGTCTATACAAGGAACCAAGAATGCCTTCAATCTTATCCGAGGTTTCATGACAAGATTTGTGAGCATTGCACAACCACTGCACAGCTGAGATACTGATGGCACCATCCAGAACCCAGGTCGAAGCCCTAAGCCCTGACCCATGTCACCCAGAATTAGATCACCTCAACCTCACGCTCCAATGCAATATCAAGCATTGATTCTGATATATCCCAACCAAGCCACTGGTGTCCGTGCTCAGTGAGTGTCTCCCCACTTAGACCTGATCCGCAACCAATATCAAGAAGTAATCTTGGGATGCCATCATCTGGCAAAGCAAGAAGCTCCAATGCTCTCTCAGAAAGTTGTGTCTGTATGTCGATAATTCGAGAAGATGAGGTGTACTTTCGAGCTTCATCGTCGTTGTAGAAAATTTCTGGCGGTGCTAGAAGTTCTGGTCTTGACATTTTTGTGAGTTGGGGGAAGCTAATTTGCTTTCCCTTTTCTGAAGAAGAAAGGCCTAAAATTTCTCTGTAAACCCTAGCAAAGCCCTG

>TCONS\_00036965

AGTGAGATTTGAATACTAAAGTTAAACACATGCTCCTGGTGATCGTTTTGTTTGTAGAAAATCTTTCTGGTTCCAAATTTTGTGGTTGGATTCATTCTAATATTATATCAAGGGTCTGAGAATATATGTATTCATGTGAAGCTTATGTGTTTTGCTGTCTACCAGAAATGTTATTTCTTTCATGTCCCTTTTCATTTTCGTTCAACTACATATCCATTCATAATACGATCAAATCCTGTGGAATCTAGTGTCTGGCTCTACTTTAAGCCAAATATGCATCAAATATCATATTCATGATCAACTACTAATAACGTATGAGGACCAGCAGTTTCATGTCTGCGAACGACCAGTCACTGCATTAAAC

AAGTGAAAATTGTAAATAAGTGAATAAAAAGCTGGGTAAGTCTGAGCGTTTATAAGCCATTTTTTAGCTTGATGT  
GATCTCTGATGCAAAGTTTAGTACTGTTTAACTTTTTGTTGTTTCTATTCTAAAGTGTATAATATCAGAAAGG  
AAATGCTTTTACTCTTCTTGCCTGCAGTATGCACGGGCATTGAAGGAGAAAGGAGTTGAGGACAAAGTCATG  
GTGTTTTCCGAGGACACTCATGCATTTTATAGACCACAGTGTGACTTCGAGAACTTCCTGAATATTGGTGCGTG  
GCTTAAGAATTACTGCAAGTAGATAGATATATGTTTCAGCTCTTCAGCAGGAATTTCCCCGTTCTTTATGACCA  
ATCAGAAAAGAAGATTAAGCCATTT

>TCONS\_00037045

CTCATATAACTTTCCCCTAACCTCAAACAACCTTTTAGGGCTCTGCTCTTTCATTATGTCTGATGCAATTTCTGA  
AAGATATTGCTCCCAGTCCATTGGAGGTATAGCTTGGTTGTTTGTGAAGGGATACCTTAGGCAAATAGTACAA  
GGGGTCAACACATGCATAAGGAACTCTGGTGCAAATAGTTCAAATAATATGTGAAAAGCTTGGATTTAGCA  
GCTCAAGCTAGCAAGAAGCTAAGACAAATCAGTCCAGCCAAGGTGTTACGAGCTCAAATGTTGAACACGAC  
AAGTCTCAAACGTCAAGACTGCC

>TCONS\_00037273

GTATCGGCACTAAGAAGCGTAATGTTGTCTTTAATTGGCTTGTGATTCTTGTTGAGCAAACTAAATAGTAAA  
TATCCACTTTTGGTGGGTGATGAAACAGGAAATAATCAATGCTGCTTCATATGCTCCGCTGCCACCTTCCGAC  
GGGCTTGCAAAAAAACTTTCTAAGTTGGCTGTCATGGGGAAGGAAAAGAATGCTGCATGAAAAGCAAGCGC  
ATATATAAAAGAA

>TCONS\_00037278

GCATGGTCCTTGTGATACTGCTAGAAAATCTTCTCCTTGCATGCAAAATGGTAGATGCACAAAGCACTTTCCC  
AAAAAATTTGTGTCATCAACCACAATTGATGAAGATGGGTATCCAATTTATAGAAGAAGGGATGATGGTAGA  
ACTGCAAATAGAGTTGGTATTGCGTTGGATAATAGGTATGTTGTACCACACAATAGATTTTTATTATTGAAGT  
ATGGTGCACACATTAATGTGGAGTGGTGTAAATCAATCACGATCCATTAAGTACTTATTTAAGTATGTTAATAA  
AGGTAATGATCGTGTACGACAGCTTTTTCTCAAAGTGTAATAATGAAGACTCGGG

>TCONS\_00037350

TTATTATTACCAACTCTTTACATCAAACCTTCCTTAGGAGAAGGAACAGCTTCTGGTCAAGCTCAAATTTAGCT  
GCGATGGATGGATCTCCTCTCAGCTGCATCAGAAGTCCTCCAAATGAAACAAAAATGTCTGCTTTAACATGCT  
TTCCTGAACCTTCCTCTGAGATCCTATATAGCTTCCAAGCATGACATATTCGAACTTATCAGCAAGTGATTTT  
TTGTTACCCTCAATGAAATAACCTGTATCTGGTGTCCCATCCAAGTTCAAAGTAGATGCTAAAACCATCATAA  
ATTAAATTTCTCTTTGACGCGCATAGGATATATCTCAGTGTTTACATCCAACAGCATGTACATATCAAACCTGCT  
CACTCCGTGCTTCAATGCGATTAACTCTGTCAAATTTTTTACCATCAGGATCCTTTTGAGTAACAGTAAATATA  
TCTTCGAAAAGTGTTTCAACCATCTTCAACAACCAGGTGTTACAGTGATGGCGATT

>TCONS\_00037351

TTATTATTACCAACTCTTTACATCAAACCTTCCTTAGGAGAAGGAACAGCTTCTGGTCAAGCTCAAATTTAGCT  
GCGATGGATGGATCTCCTCTCAGCTGCATCAGAAGTCCTCCAAATGAAACAAAAATGTCTGCTTTAACATGCT  
TTCCTGAACCTTCCTCTGAGATCCTATATAGCTTCCAAGCATGACATATTCGAACTTATCAGCAAGTGATTTT  
TTGTTACCCTCAATGAAATAACCTGTATCTGGTGTCCCATCCAAGTTCAAAGTAGATGCTAAAACCATCATAA  
ATTAAATTTCTCTTTGACGCGCATAGGATATATCTCAGTGTTTACATCCAACAGCATGTACATATCAAACCTGCT  
CACTCCGTGCTTCAATGCGATTAACTCTGTCAAATTTTTTACCATCAGGATCCTTTTGAGTAACAGTAAATATA  
TCTTCGAAAAGTGTTTCAACCATCTTCAACAACCAGGTGTTACAGTGATGGCGATT

>TCONS\_00037642

ATCCATTTCACTAAACCTTAAGGGTGGCAGAATAGATACATCACTATGAAGATTTACTAATATTACATACAAC  
ATATTTTAAACCTTTTGATTTCCATCTTGTGAACTCAAATTTAGAACAACCTGGTCCTTGTGCAATGCCTAACTG



ATTTATGTTTGTATCTGCTTCTCGGATTAACAAAGTGGGGGGTGCTCTTCAGTATTCATTGGATGATTTCCAGTC  
 ATCAGACAAGACTCAACTCATCAGATACTGATACACCTTCAGAGATCTCGTTTGACTCAGCAGCAGCAATCTT  
 TTTCCGCAATGCCACCAGCTTCTCGCCAGCATCACATACGTATGCAGAAGCTTGCCTACCTGAAAGAGTTGCC  
 CCTTCCATGCTATCGATGTAGTCCTGTTTTGTATATGAGCCAGCAAGAAAGAAATTTTCCACTGGCGTCTTCTG  
 ATCAGGTCTGAATGGGTCTTTACCAGGTCCTTCACGATACAGGGATTGCCCAATTTTCACAACTGATGACCAG  
 GTAACCTCAAGACCTTGGGAAGAAGGAAATAGTGCCAAAACCTGCTTTGACACTCTTTTTATGATTTTCATCAT  
 TTAGTAGAGGCATGTACGGGTCACCTGGCGTAAGGACACATTGAAGCAATGAGCCTTGGCCCTCAATGTAAT  
 AATCTTCCGGAGATGCCAATGCAAGGTCCGCAAAGCAAGAGAAATCTGCATCTGGTGTATACAGGAGATTGT  
 CCAAACCTGTAGCGCGCTTCAATTGCCTCGAACGCTCCAAGTCCTGCAACTCTGTAACCCAGCCATTGTATCG  
 TAGTTGCACTGTAACAACAGGCACTCCAACCAATTTGTAAATGTTGTCAAATAATTCCAATTCCTCCACTTCT  
 GAGGTAACAATCTTTTAATTCCAGGGACATCACATGCAGCGACATAAGCATCAGCTTTTACAATTTTCTTCTG  
 AGTGGCCTTTGACATTGCAAGCCCCGCTAACGTACATACTTCCATCAGAGGATGTCTCATAGAGTACCTCTCTG  
 CACCCCCACCTCAGATGGAACCTGCCCCCTTATCCAAGATGTACTTCTTAATGGGACCACTCAAATAAACGT  
 CAGGAGAACCTTTAAGCATGCGTAAAAGGGAAGCCTCCGTTTTAGTGGCAAATAATGCAAATATAGTGAGCA  
 TACACCGAGCACTGATATTGTCACAGTCAATGAATCCAAGAGCATATGCGACAGGATCCCACATCCTCTGGA  
 TGCTAGTACGCGTCCCGCCTTTAGACATAAACCCTCCGAAAAGCTTACGCTATCCAATCACGTATCTGCTG  
 CAATGCACCATCTGGATCAACTAAAGCCCGCACCACTGGACTAAGGGCAAGAGCTACAGCATTCTAGCTTT  
 ATCGTAAGTCTTTAGCTGATTAGTAGTCAAAAATGCATTAATTCCATGTAGGGGTGCTCCAACCGGAAAACG  
 GAAATCAAGCTCCCCTATTTACCCCCCTTTATTTACAAATGTGTGGGTATGGTCCTTCACTAGCAGATTTTTTTC  
 AGCACCCACCTTTTTCAACAAACGGAACAGATTATTATAGCAACCAAAGAACACATGCAGTCCCATTTCAT  
 GTGGTTTTCCACGTCTATCAACAAAAGAACCCACTTTCCACCAATAAAAAGGCCTCGATTTCATATATATCCACC  
 TCATGTCCTTGATCCAAGAGCTCCACAGCAGTCGACATGCCTGCAAGCCCAGCTCCAATAATAGCTACTTTCA  
 GCTTTGGCCCTCGATAATGTTCAAGGTTCAAGTGGAAATAGCCCTTTTGGAGCATTGTACTCATATCAGAGAC  
 CATGGAGTCCAAATCAGCACGAATAACTGACTTCCGGGTCACTAACCGGTTGACAAACGGGTACCACGGA  
 AAGCCAAGAATCCAGCTGACCCATTGGAAAAATATGTTTCTTTCCAGAAGCTG

>TCONS\_00037777

CCAATATGAGAGCCCAGTGACCAACACACCACAGTAAGCCACAGAAAGAAGATTGAAATTGAAACCTAATT  
 TCCATGCTTCTATGTCCCTCTTTACTGAAATAGCCCAAATTGCTGATTGAATGCAACTAAAGAGGCATTGAAG  
 AGTTGTAAGCCTTATTTTTGCTGGATATTGTTTCATAATTGGACCCTGTTAGAACAAATTGAAGCATACTTTTA  
 C

>TCONS\_00037857

GGCGCACTTCTAGGGGCTTGTAAGCTACACTGTGACATTGAGGTAGGGGAGGAGGTATCCCATAGACTTTTTG  
 AACTTGAGCCTCAAAATACTGGTAATTACGTACTTTTGTGACACATCTATGCTGCGGCAAATCGGTGGTTAGA  
 TGTTGCGTTGTTGCGTCTGAAAATGAGTGAGAAGGGTCTTAAGAAGATACCTGGTTGCAGTTGGATTTACGTT  
 GCTTCCTAGAGATATCTTCATCTACCTCAAATTGCTTCGACTTGCAGGTATGTTTTTATTCAATTTTGCTCATGT  
 TTTTTGCTATGCATTTGATAAATTATCAGTTACCAAAGCTAAATAGTGCACTCCTACACTTCATTGTACTCCAA  
 ATTCGGCAGAATTCACATTTTCTGTTGATTCCAAATTTGATCCATTCAACAGAGGCCAAAATTCATCATTATGTG  
 CCAATAAAACAAAATCCCCACTTTCTGTTGTCCATTCCAACATCGATTCCAAAAAGGCTAACCCACAAAATT  
 GAAAAGATATTGTTGGAAATTTGCTCTGTCAATTAGTTAATTTTTGGGTTGAGTTGGGGTGGACGAACGCTGC  
 ACCAAAGAGCTGTATGAAAGCAACTTAAATTATACTGTAAACTTGGAAGAACAACACTGTAATTTTGAGATTGT  
 GACTCTATACAGGGGTAAATTGATCCCTTTACCTCCTCATAGAAACACATGTAGCTCTGTTTTTCTTCAGCCCA  
 ATTTCTGCTTTTTTGCTCTCCTCGATTCTTCAAGATTGAGGCTGACTCCATTGATTGTTGGCTGAATTTTTCAAG

GTGTTGTGCATAGATTTCAGCAATTGTAAATCATATTCTTCGTAGTCTTTGGCCCTGTTATGGTCCTGCTGTTGA  
AACACAACCTCAGTGAAACATGTTAAACTTTGGTTTCTTTTTCTTCGAGATTATATAATTTGTTGTTCTTTTTTGCT  
TTCTTCATGTTTCTTTGAAAATTCTGGACATGCATTTGTTTATTTGTTGAAATGCCTCTTATAAAAATTCTCTATA  
TAGGAGCATACTCTACTACAACGCTGCACCGATGCACCTAAGGTGTTTGATAATATGCCTGAGGCAACTATA  
ATCAATTTTTTTATTTCTTTTCCTTTTTTCACACATGAGTTCTATAACTTACGCATCATTCAACAACCAAAAAGGT  
ATATGGTTTATTACTGCTAGATAGTATTAGTAAACAATATATATGTCATATGCTGTCGTTTTAAAGAATTGCTT  
TTTGAAATAATAAATTCCATTTGCTTCTATGTATATTTCTATTGCAATATTGCTATCTAGCTTTGCGTTAACAAA  
AGATTTGGATACAAAGAAATGTGATCATGCTCCCATGTTATTATTGCCGTTACGAAGCTAATTTGGCTAGAG  
AGGAAGGAAGAAAATGACAACAATTGAGTTAATAGGATGTTGACTCTTGGAACAAATATTGGTAATTTTCGAG  
GCATTTTGTAATACAATTTTAAAGAGCAGTATGGTACTAAAGAGCAAGGGAATAATGTACGAAAAAGAGGT  
GATGTTGTAGGGTCGTAGCATGGTGAAAAATGTCAAGCTTTTACCAACACCGATGAGAACTTTTCATGATCCA  
ACTGAAAGCATGTTGAAGAAGGCTAACCACTAAAATTAGTGAGTTGTGGTCAATTGACATACCTTACCTTTAA  
ATCTATGAGTTAAATGATAATTATTGATTTATTCTTTAGGCACCATATTCTAACAACCTTAATGAAAATGACCTG  
ACAATCAAGAAGTCAAGATTATTTAGCTACTAAGTTTCACTTGATTTCGTCCTTTGTTCTAAATGAATGTGACAA  
GATGACTTCTTATAATTAATTATATGAATGGTAGAAGTGACTTCTAGATGTTTTAGTTTCTTTTATGGTGGTTAT  
CTGAAAAGAAATAAACAAAAAAGTAGTACTTCTGTTCAATGGTTGAGCGTTGAGTTAAACTTGGATATATAG  
ACGCTTTGGATTACATATGGCGCAGTATTTATAAACTAAATTGAGCTTTGAGCTGTTTAGGTCATTCCGCCATG  
AATTTTGAGCTTGAGTCTCTTAATTAGTATGAACAATTTTCGATTAGACGATGAGCATGGTTTCGATTTTCATTT  
CTGAGAATAGTTATTGCAGCTTACTATTTGTTATTGCTCACAATACACAAGAAGGAAGCACCCCTCACACAAA  
AAGGGAGAAAAAGAATTAGAAGAAAAATTAACATCTTAGTTAGTAGAAGCATTTAAAGGTATTTGTCTATGA  
TATTCCTGCTCTGTCACCTCAAATAATTGATGAGATCGCTGGAATATGTTCCATTACCTAAAGAGATGATTT  
GAAGTCGTCACCTACTTTTATTATATGATAGTGGTGTCTTTTTTAGGTTGATCACACATTAGGACTATCAACAGA  
ATGGTCTCGCCAGGCTCTATGCCTTACCAATAAACATTAATATGCTCGAACAACCTTTATAGTGATTATTTTCT  
TTTTGGGTAAGTGCAAGCTAATTTGATAATATGAGTATGAACTTATTGGATATCAGTAGTTTATTTCAGCTTTCC  
TTGAATTTGTACAACAATTTATCTTTTGAACCTTACTATTTCTACTTTTTTGGGATAATATTTGTTTTTCCTGTTAT  
ATGATTTTATCTTGATTCTATATAGTTTTTCTAATTCCTTTTTGTTTCGTTACATGAAATGCAATCTTAATTTATA  
TGTCTTTTTATTATTTACTTTGTTTGATTAACCATGAAAATGATGGAAATGAATAATCTTATTGAAGAAATATTT  
ATGGAACCTGGAGTTACCAACTAAATCAAAAGGACATGAACTAGGGCGAGATTGATATAACTAGGCTGCT  
ACAGATAATTGCTTAGTCCCTCTGATAGGTTTAGTGTCTCCATTTCCCATGGCTATAGCTTGCTACTGGTATAA  
TATGTCAATCTTCATATGTCTATTACGCAAGGAAAAAATTGATGGACTAAGCAATATTGCTTTAGGTACTGCT  
CTTATTCTACGATCAAGGCAGGAGGAGTATTGCATGTTAATCCATGCAGTAGTTCTTTGGAATATGGACTAAA  
GGCTAAAATTGTTTACTCTATCTGGTTTAAACAATAATTTATGGAGATGTGACATCCTCTTTCTTCATTGTGATAT  
TAATCACTAATTAGACCTTTGTCATAGAATATCTAATCAATTGGGCAACAAAGTATGAGATATATGAAAAT  
GATATTATATTTAATTGATTTAGAAGGAAATCTTAATAGTCGTTCCAATGGAACCTCTTTCAAATAGGTAAGC  
CAGTGGAGAATTTGCAAACCTCCGACAAGTCCTTTTGGATTCAAATAGAGGTGTCCAGGGTCCCATAGGTTG  
AAGGATGCCTACTACTAGCTGAACTTTTGTGATAGTATTATCCCTCCATTTCAATTTATGTGAACCCATTGA  
CTGG

>TCONS\_00037925

AGCAGATCAGGTATGCCCTCAAATACCCAAGCCAGGGATGCAATCAATCTATACAGGTAAATTAAGGAGAA  
GAAGAACTTCAGATAATAGAAGTTAGATGTCAAGAAACAAGAGCATCAAAGGCTACCTTCTCAGTTCTTCTG  
GAAAGCGCCGATGGCTCATCCATTGTCCAACATCACGACGCCTGAGAGACATTTCTAACCTCCTGCGATTTAG  
AGACTGCTGAAAGCTCTGCATATTTCCAATCAGGAGTGCAAAAAGTAGGAGTCCCGTTCCGATGATAGCAAT

TGTGAAAACAACCTTCCAACAGAAAATAAAGCTCGGGACTTGATTGCCAGCCAGTGTACTAATTTGCTGGAAGCC  
CCAAAAGAATGAGTACACGTATCTTGTGACAACACTCTGTTTGGTGGTGAAGATCAACTGCTTGTATAGATT  
CCAAAGTCAAAACTACCTTCAGTAAAACAAGCAACTGCATCAGTATTGTTCTTCCACTGGTCCCATGTAATAT  
CCGACCGAAACTTTGTGTAATCGGTGCCATGACCACAGTCTATGAACTCCATACACCTTTCTATGTTTGAGCT  
GCGACAAGCACCTTGAAGGCATAGATTAAACCCTCTGTAAACCAAAAAGATACCACAATGAGCCCACTATATT  
GCTTGATACAACAATTATGAGAAGATTTATGACAAATGTTGCCCATATTGACTCAAATATAAAACCACTTGG  
GACTGGCCAGCAACCAATAATAAATCCTGTACAACCTAGAATTGTACTGGAGTAGTATAGCTGCCCAACAAT  
AGATTCTTCGTGTAATTTACCCAGATGATCCAATAGACTTGGGTAAAACCAACAAAATGATGATCTGAAGA  
AGAATGTGCATTAAGTAAATGATATCAGTGATGCTCCTCAAATCACAATAATTTTTGTTCATGTGCCAATT  
GCACTATGCATTTGTTCCCCTGTTGGACATTAAGCAAAAAGAAGAACAGGGGATCTATAAATAATGCAAATA  
GGCATGAGATGACAAAAAATTTGTTCCACTTCTGGACAATCTTCGCATGAGGATTCATGACACCAGGAATAT  
ATGGATACAAGAAAGAACAAGTTCTCTTCGCCCATCCTTTTGTATCTCCATACAGCATATTATGGAACCGGTG  
ATCAAACATATCTGAAGACTTTGAACCTTTTTTTTAGTGCTTTCAAATGGTTATCGGTTGGGCATGTTGTGCAGT  
AAGGATCACTGCACATACCCAGTTGACCAGACTTCAATAGATGTTCAATTTTTTCCAGTGTAGTCATTATTAGTC  
CAACCATTTTGTCTCCACTGCCAATTGAAGGATATTTTTCTGTTGTTGGCAGAGTTGGTTTGTGCACTACTGCA  
GTGGGAGTGGACCGAGAGCTATTCTCAGGCTTGTGACTAATATATAGTGGCCCGCTCATATGAACCAATGAA  
TTTCGCCCTCACTTCTCAAAGGACCGGTATAGCCTACAAAAC

>TCONS\_00037961

GCAATTTTCATAATCCGAATTGAGGTTGAACATGGCGATGAAGAGGCCTTTGCAGTGTATGTTGAGAAGGATTT  
ACATGAATGGAGGAAGTTTTAGAAGTTTTAGTGCACTTCCTGAAGGCAGCACCACAACCTTCCCCTTCTCAAAA  
TCTCATCGATTTGGAGTATGAGTGCAGTGCCCAACAATATTGCCTTGAGGAAGGCGAAAAAGCTGGAGAAA  
ATGACG

>TCONS\_00037973

TCTTCTTCTGGTCTTCACCTTCTTCTGCATTTTCTTCTCAAAAATGTCTCCATGAGCTACAATTTGAGATCTTTC  
AGTATAACACAGAGCTGTGGAGCTGAGAAGAGTTCTGAACAAATACACAGTCCTTTGTTTCGAAAGCCTGCA  
AAAAAGAAGCACTATCTGTAGCTGAACGTGATATATGAAACCGCAAAAAACCCCTTTTTACACAAAACAC  
ATAG

>TCONS\_00038126

CAAAGTTATTATTGAATCAAATCAAATCAAGGGGAAATGACCCTTCAACCGAAAACACTTCGTTCCCGCAAA  
TTTCCTTTTCTTTAACCTCACTCTCCGCCTCATTATTATTATTCTTAAATATCAAGCAAAAACCCAGTTCAA  
GAAAGCTATATCAGATTGACATTCTTGACATTTATTTGAAAAAACAATAATGGGTGTTTTTTCTGGTCATTG  
GCCTTCTGAATCTGAGGAACGTAACCTTAAAGGAACCTATACTTCTATGAACATAATATTCTTTTGAGCATATTC  
CACATAAGCCAAGTGCAAATATCCTTGTATTGCGTTGTATGCAAGTATCAATAGTTAATCTTGGTGTGTTTGTA  
TTTGAGAGAGAACTAAAAATGCGGCAATAACTTTAGCTAAGTTGGTTTATCTTGTTTCACTGTAATCTCCCC  
G

>TCONS\_00038184

TATTATTGTTTTGATTTATTAAGGCGAGATTCTTTTGTGGGTCAATATGCCTGGTAAATTGGATAATAATAA  
TGTACATTGGCGAAGTAATAATTAGTTGATGGAATCCATGTCTCGGTTTAGAGATTGATGATACACCTTTATG  
AAAGCTTATAAGTTTTCATGTGTAAACCCGGCTGGAGGATTTTGTATCCGACACATGAAATAAGTTAAGCGAA  
AGTCTAAA

>TCONS\_00038187

CTCATTACACATTGAAAACATAAAATTTGCCGATTGGCATATCTTTCTGGCTTATGCATCTCCAAATTCCAATTA  
GTTTCTCCTTCGCTAGGCCAGTTAAGAAGCACCAACGATGATGTTGTTGATAGGAATAAAAAATCAACTTGACG  
AAAAATCCAACAAACCCCATGACGACGAAACCGATGGCGGTACGAGTCGCAACCTTAGTGAATTCTTTGCG  
ATCAGGCTTGTGACATCTTTTGACAAGTCTAACGCTGTCTTTGGCGAAATCTCTAAGAGGATCGAAAACAGAG  
TCTAAGGCGTCCATTTTAGCGCTGAAAGAGGAGTGCGGATCTGGTTTGA

>TCONS\_00038361

CTCACAACAGCTTTACAAGGCCATCAAACAATCAGAATTTTGAGAATGTTTTAAGATTCACTTTCCGGGCACA  
AAGTTTGTGGCGTATGCCCAAGCGTTGTTGTTAACTGGGTCTGCAAGGTGGTCAGCAAGGTTCTCCAATGGAC  
CTTTTCCGGTAACAATGGCCTGAACAAAGAATCCGAACATAGAGAACATGGCAAGTCTGCCATTCTTGATCT  
CCTTTACTTTGAGCTCAGCGAATGCCTCTGGGTCTCAGCAAGGCCTAATGGGTCAAAGCTGCCACCAGGGTA  
GAGTGGGTGACAACCTCACCGAGAGGTCCACCAGCTACACGGTATCCCTCAACAGCTCCCATCAAGATAAC  
TTGGCA

>TCONS\_00038422

GGGTCTGATCCTTTTTTACACTTCTTTTGCTCGATTGATTTGGATCAAACGTTATTGCAGGGGCAGGCGCTAT  
ATTCAGCTGTGTGTGTAGATCCTGCATGTCAACAGCCTTTAGAATCCGAGAAGTTCTGAGAAAAACAACCTG  
CCTTCTCCCCATGTGAGAGCAATATCTATACTTCCCAGAGCAGATACCATCTTCGTTTGAATATTTAAGAGCCC  
AATACAAAGAATTAGAACCATCACCTTACAGGAAGAAGAGCACATATTTCTTCACTTGAAGAGGAATAGAA  
GAGAGAATAAGTGCTTTGTCTGTGGCTATACTCTTGCATATTATCTTCTAAGGAATTTATATATAAAAAACTT  
GTGAGTCATCTTTAATGGGATTTGCAAAACTAAAGGTACTAAAGCAGGGAGGGACCCAGGGGCAAATATCTT  
AAGAAGTTCAAGATTCACCTCAATCATGAGCCTGCTATAGAAGCAATAATATAAGGCTGTTTTTAGAAGACA  
CTGACAGGTTTGAATAGAAAGTTAAATTTGGAACCATCTTGGGAAGACAAGAATCTTAACATTTGTTCCCCA  
CATCCCTATCATTTGTCTTGTCTTTTGGACCAAACAATGACCAATCCAGTCTGTTTGAACCTTTATGCCAACTC  
ATCTGCCACCTCATCAGATTATGCTCACGGCTTGCTTGCT

>TCONS\_00038430

TAACACATTACCCCTCAACTTCCATCCGTCATTAGTAATCTTAATTCGTTTTTCTATTACACAGTACGCTGCGT  
GCTACAACCTAGCAGCCATTTTATTGTCAATCGTTTATTGTAGCATTTACCCTAAAACACTGCATTGAATTCAT  
CCACATTATGCATGTCCTAAATTCTCAGCTGTGTGCAGGCAAGGATTGTCCCTCTGCACCTTGTCAATTGGAGCA  
ACCTTACGCCACACCAACCTCTCATTTCOAAGCGTCAATACATCAACATCAGACAGCACTTTGATGTTACAAT  
TCCAATGCTCAGGTCCATTAACCCCTCCAACCTATATAAATATCATCTCCAAGCCCTATCATAGCAAACCCAAT  
TCTTCTACGAAACTCAGATGCTGAAACTACCATCTCTTACTTCTTTTTCTGCTTGTAATGAACCAATTGCT  
CATAACATAAAGCTTTTTCCCTAACGACAGTCATTGGACCCTGGAGCCAAGAATACTCGTGAACGGTCCAACC  
TTGCTTGACATTTTCCAAAACCTGAATAGTCGATAAACCTTTATGCAAGACATGAACCTTACCGCCAACAACC  
ACTCCTGAGCATGCGGAATTGTGCGCGTGATGGAGATCGGGTAATTGAACCCAGACATCCTTTTCTGGATCAT  
AGATTTCCGCGTTACATATTGATTTCTGTAGTTAGTAAAACCCCTGCAACAATTATCTTATCCTCCAACACG  
CAACAAGCAAACATGGCAGGAGGAAATCATAGACGCACACCGTCTCCACACACGGGTACAGGGTCATA  
TGACCAGACCTCATCAGTCGCGAAAATCCCATCTTGGTCACCTGTCAATGGATCCACAGCATCACTGCCACCG  
CCTAAAACAAACAGCTTTCCAGCAGTAGAAACAACACTGAAGCGAGCAAGATGACTGATGTTTGGAGGGGAG  
AATAGGGAGAGTAATCCAACGGTCATGCATAGGATCATAAAGCTGCGATAAGTTTTTCAAGTTCAAATGCAAA  
TACACATAAAAACTCTTCAGACGAGTTGACCTCCTTTCTCGCTTTAAATAGTTCCGTACTTCGAATGGCAGCTC  
TCCAGGAATGGGAACAAGCTCTAACTTTGGATGAAGGTGGAACGGAACCCGTGCAATGCACCTAAGGGCA  
ACAGCATTGGGAAGACCTTCAATGAGTGCAGTCATAACCACCAAGCTTGATCTATTTTTATCAGCAAATAAT

GATTGTGGTGCCTACTGTTGGCTGACGTCAACCTGCTAGGTCAAGAAGATAGCAGTCGGCCTTGAGATTACAGTTCAAAGAAGATAACATAAGAATTTGCTTGGCTTTTATCACAC

>TCONS\_00038527

AAATTTGTACACTATTTCTGGTGGTCCTGAATAAACATGAAGGATTTCAATCGCGAATCCTCGTAAAAATATG  
GATCTGAAAACCTTTGTGTGATGATTCAAATGTCTCCTCATCAGGGTTGTAGAGTCGAACACTCTCTGGCAATG  
ACGTTTGAAGGAATGTATTATAGCCACCTCCAAGTTTAGCATTTTCTTCTGGTGTCAACCCTTTCTGCCATTG  
ACACTCTTTGTGAATATTTTTGGATCAACAGTTTTGAAGTCATTAGGATCTGTCTTGTGGACCATTTCATTTC  
CAAGTCTTCAATATCCTCTGCACCTTTCTCTTCAAGTGATCCTTCAGGCCATACATGAGTTCTTTCTTCTTCAAAA  
AGCTTATCAACAACATCATAGGTAGGAGGGCCATTCTCCATTTTGTGTTTTTGACCTCTTCTTCACTCAAGTA  
ATCTCTGTATTTGTTTCCTCCTACTATACTTTCCATTTTGATTTGATCCTAACTAAAGAAAG

>TCONS\_00038813

TCTGAGGATTCATATAAGAAGGGATAGTGTGGCTTTGTGAATTTGCAAGGCTTAGTGAGGTGTTTTGTGTTGA  
ATATTTTAGGATAGGCTGTGGATAGAAGAGCTGCAGCTTCATTATAAGTTTGATTAGGCCTTTTTTCGAGGGGT  
CGAGGTTTTCTAGTTGAAATTGCAATAGGAGAATTGCTGGAGTCTGAAAGAGTTGATGAAGGTGAAGATGAT  
TGTGAAGTCCATGAATTAGATGGAGATTTTATAATCTCTAAATCCAATTTATAAGCTGCCCTTCCACCTCCAGT  
TAAACAAGACATTGTACTAATGAGAAACAGAGAAGAAATTCAAGAATTTGAAATCTTGGAATTCAATGATG  
AATTCTTGAAAACCCCATTAAGCAATTCAGACTTAATTCTC

>TCONS\_00038814

TCTGAGGATTCATATAAGAAGGGATAGTGTGGCTTTGTGAATTTGCAAGGCTTAGTGAGGTGTTTTGTGTTGA  
ATATTTTAGGATAGGCTGTGGATAGAAGAGCTGCAGCTTCATTATAAGTTTGATTAGGCCTTTTTTCGAGGGGT  
CGAGGTTTTCTAGTTGAAATTGCAATAGGAGAATTGCTGGATTCTGAAAGAGTTGAAGAAGGTGAAGATGAT  
TGTGAAGTCCATGAATTAGATGGAGATTTTATAATCTCTAAATCCAATTTATAAGCTGCCCTTCCACCTCCAGT  
TAAACAAGACATTGTACTAATGAGAAACAGAGAAGAAATTCAAGAATTTGAAATCTTGGAATTCAATGATG  
AATTCTTGAAAACCCCATTAAGCAATTCAGACTTAATTCTC

>TCONS\_00038827

CTTCTACAAATCATTGCCAGTAATCCTCATATCAGCAAGCTCTATTTACGAGGGTGCACAGGCTTAACCATTG  
AGGGAGTACTTGGAGCAGTGAAGTTACTTACCAAGGGTAACCTACAACCTTAACGAGCTTAAGTATTTCTGGCA  
TCTATAATGTGAAGAGAGAGGACTTTGAGACACTTGGTCATCTAATGGGTATAAACCAGATGCAAAAGAAAG  
AAGGAACAAAG

>TCONS\_00038898

GCTTAACGTCAGGTTCCCTCCACATACATATGAAAAGTAAGCCAGCCGTATTAGCTCATCAACTCGCCTTAAC  
GCACCCTCACTATATAGGTGCGGACTTGCGTACGGTATCACTTGCCTAACAGCTGCCAAAAGCGGAAGCTTC  
AATGTTGACGGGCTTATTGTCTCCTTTCTTATCTTAAAAAAAGGGAAAATAAGAGAGGGATCACTCCTCGGGC  
AGTCGCTAACCGTTGCGCCTTCCCTTCTGCTTACACCATTTCTTTGTGAATGCCCCGCTTTGCTCTTTGTGCGC  
TACTTCCGCTAGCAACCAGCTTCGGATTCTCCTTAAGGCACCGTGTTGAGTAGGGATTTGAATAGAACTCTA  
TTTTGGGGCTCAATGTTGCTGGACTCTACTCCTCTCCCCGGGCTCGCTCCGCTCTATGCCCAAAGCTTCAACTC  
AATCACTTGGACAGAGGGATTTGACCTACCAACTGCAGGCTCGGGTGCGAGAACGGTATCCATTGCCTGCTG  
CCCCCTCCCAATAATACGTGTTTATCAACCACCGCTTACTACAAGAATGTATCATGATGAGAATCAAAGCA  
GTCTTGTGAATGCCAGTTCTCCTGTCTTCTCGGGTCCTTAATAGAACTCAAACTAGGTTTCTTCTGTATATA  
AACTATATCTTTCTTCTCCTCAGAGATTGAATTGAAAGTCGACTGAATGTGATGAAAGGTTATATGCTTAACA  
CATGCAAGTCGAATATAGTATGAAGGCTTTCTCTTCTAAAGGCAGGGGTGAGGACTCCATTGCGGCATTAAGT  
AAGGAGTTGGAGGAAATCAAGGCGCATCCA

>TCONS\_00038899

TACTACAAGAATGTATCATGATGAGAATCAAAGCAGTCTTGTGAATGCCCAGTTCTCCTGTCTTCTTCGGGTC  
CTTAATAGAACTCAAACTAGGTTTCTTCTGTATATAAACTATATCTTTCTCTTCCTCAGAGATTGAATTGAAA  
GTCGACTGAATGTGATGAAAGGTTATATGCTTAACACATGCAAGTCGAATATAGTATGAAGGCTTTCTCTTCT  
AAAGGCAGGGGTGAGGACTCCATTGCGGCATTAAGTAAGGAGTTGGAGGAAATCAAGGCGCATCCACTTCG  
TCATCTCAGTCTCTTTTTGTGCAAAGAGGTAGAAAAGATTCTGCCCTTCTAGCCTCGAGTAGTGGACAATGTA  
TCATTG

>TCONS\_00038908

AAGTGAAAAATAACATAAGATTGCAAAATGAATAATGTACGAGCATAAGGTAACATAGAATACGACATTCA  
GATATGAATTGAATGATTGGGGCATGTTGAAACACAAACCGTCATCAACGCCTTCAGATGCCACTGATTCA  
GTAGAGAAGAGATACTTCACTCGTGAAAGAACAGAGTCATGGGCAGGATCATAGGGATGGTCCTTTGAAGG  
AATCTCCAGAATGGCTGGAATTGGTTTGTGTAGCTATCAACCAAAAATCTTATCATGTTGGCAACATATTGG  
CTGATTAACACGATTGCAATATCTTCTCTTGTGGTGAATTCTTAAAAGCATCTTCAATCTGCTTCACCGTTGTT  
TTTGAATCCACAATGAGGTAATTTGTTTTCTCCTCAAATCAACATTGCCAACTCCAGCCAGTAAAAATCCAG  
TAATTGTATCCTCATCAGCAATCATAGCAATAAGTGCAGAGTTGCTGGTTTTAATTGGAGCTCGGTAGCCATT  
TAACACTACAACAACGTTTCTGCAAATAACATAACATCACCCAATTAACAAACATTTAAAAGCATGAATCTT  
GAACACATAAAACAAATTCAGATTTCAAATTGAATTCTAAATAGTTAAGAAAAAGTCATCAAACCAATCAA  
AATCTTTACAATTCTAATAATACACAAAGTTTGATGAAACCCC

>TCONS\_00038946

TTTAGCTTACCCAATGATGTTGATGGGTAAAGTGAAGAGAAAATGGTACTCATACCAGAGTAGTGATCAATA  
GCACCGCTATCAATGATACATTGTCCACTACTCGAGGCTAGAAGGGCAGAATCTTTTCTACCTCTTTGCACAA  
AAAGAGACTGAGATGACGAAGTGGATGCGCCTTGATTTCTCCTCAACTCCTTACTTAATGCCGCAATGGAGTCC  
TCACCCCTGCCTTTAGAAGAGAAAGCCTTCATACTATATTCGACTTGCGATGTGTTAAGCATATAACCTTTCATC  
ACATTCAGTCGACTTTCAATTCAATCTCTGAGGAAGAGAAAGATATAGTTTATATACAGAAGAAACCTAGTTT  
TGAGTTCTATTAAGGACCCGAAGAAGACAGGAGAACTGGGCATTCACAAGACTGCTTTGATTCTCATCATGA  
TACATTCTTGTAGTAAGCGGG

>TCONS\_00038952

GTCATAGAACACAGTAATACTACCGAAATTAGTGTCTCACAGAGTTATTATAAATTTGTATTTATTACTGTCTT  
CAATATTATAGGTGTAGTGATATTTACAAATACATTTTCTCTGTGCGAATAGAAAATTACATCTTTGAGTTTCC  
CTGCAATGGCATCTTGATTTTCTTGACCTTGTTGATAAATGTTATCACAGTTTCCACACTTTCAGCATCTAAATT  
TGGTACTTTGTGCCCCCTCTGGGTGATGAATCACAACAGGATTAACGAAGCACTTCACAAGTTCTTCTTCGCTTG  
TTTTTTTGGCTTCCTTCTCACCTATGAAGTGCAAAGATGGGGTCTCAATTGGAGATGAATATGCATTAGCAGCA  
AGCTTAGGGCATCCAAATTCGGGCGCTCCAACTTGAAGCCTGATATTATGATCACAAATTTTATATTTGGTA  
CTTTGGTCAG

>TCONS\_00038953

TGTGCATAGGATCATTGATAGTGGGTACTTTTGCTCTTGTATGCCTGTTGCTGTTGATACTAGAGACGGTATTC  
ACTTGTTTTCCAGGTAGAACCAAACCGGGAGTTCCATGGTTTGGTATGTGAAGGAGCCAATGTGCTTCCAGC  
AAGGTTTATAGAGGATTCTTTTCAAGATGGATGTGAAAAAATTGTTAATATCAAGCGTATAGATGAAATAATA  
AGCTCTATAAATGGTTGGTACATGGAGCGGGGTCTTTTTTGGAGCGG

>TCONS\_00039219

CTTTCCATATATATTGGTCCTAGTAGGACAAGCCCCTGAAGCTGGTAATAACCTGACGACAGTTACATGTTCA  
CCTCTGGAAGCATGATGGAGAGGCGTATCACCTTCTACATCAACAAAGTCCAACATCCTCTTCGCACATTCA

GGTCAGGAGCGCTGTTGATCAGCAGTTGGGCTATCTCCGTGTATCCGCCAGCACAAGCATCATGCAATGGGA  
TTGCTCCATCTTCATCCTTAGGCTCCAAAGAAGCTCCTCTTTCTAGCAGTAGCTGCACACAAGGGAGATGGCC  
ATACAAACAT

>TCONS\_00039240

GGGGCAAGGTTCTTCCAGAAAAGTCTGAGTGATTAATATGACCTCCGCCATTGAACTTGATAGCACTCTGCAATT  
TAGCGACGGTAGGAGAATCACCTTAGTGATGGCATCATGGAGCTGTTCAAGGGCTTTATTGTAATTTGTAAT  
GTAAGTCTGATGATGTTTCTGGTGATGAATCTGCATGATCTCACAGCTAATAGCAGGTTCTAAGGCACCATAA  
TCGTAAGGGAGATCGGGGAGTGAGAAAGTCTGTACGCCGCGGAGTTGTTGCCGGAACCCTAG

>TCONS\_00039241

CTCCAATATCCATCACCACAACTTCATTTTCCAGATGCTCAGAAACATACTAATCAATTCTGCAACAGTTCA  
TTCGCTGCCTTCAACCATGCATCATAAATTTTCATCTGAAAACAGCACAAAGTGTACCTCTTTGAGCTCACTGC  
CAAATTCTTTGACAGTAGATATAGCCACAGTGGCAGCTTCATCAAAAGGATATCCGAAGACCCACATGATA  
TGGCAGGAAAAGCAATATACTGAATGTTGTTCTCATTTGCCACACGCAGGCTATTTCTATATGAATTCGTCAA  
ATAGGCTTTAGGATTTGGGACAGCATCATATATTGGTCCAACAGTGTGGATTACATGAGAAGCTGGCAATCTA  
AAACCTGGTGTAATCCTTGCTTCTCCTGTTGGGCAGCGAACTCCAGGACGTACCTCTGGGACTTTGTAGCATG  
CATCTCGTAATTCTGGACCAGCAGCTCGATGTATGGCTCCATCAGCACCACCACCACCCAGCATTCTGCTCATT  
GGCAGGATTGACAATAGCGTCAGAGGATCCGTCTACGGACCATTGAGTGATATCACCTTTTTGAATCTTCAAC  
AAGCTCGACGGAGTTAACTGAAACGTAACG

>TCONS\_00039293

TTGCAAGCCTTGTTTGCTCATGAATTTTTTTTATCATCTCAGCCTTTGTCTACCATCAAGATTAGCAATATCAC  
TAGTAGGTAATGGTAATAAATCAAGTGGAGTAAAGGGATTAAAGCCATAAACAACCTCAAAAGGAGACATA  
CCTGTAGAAGAATGGATTGTTCTATTGTAAGCAAATTCAATTATAGGTAAGTGATCTTCCCATGAAGTTAATTT  
ACCTTTCAAAACAGCCCTCAACATGTTT

>TCONS\_00039525

CTTATTCAGGGGGAGCCTCGAAAAGCACTGTTGAGAGGAAGATCCTTGGCCCCCTTTCATTCTCTACAGGGTT  
CCAAACCTTTCTTCAACATAGGTGACAACGAGCCAGGCAGAGATGGAAGAGATCAAACACGGGAATAAGAA  
GCAAGCTTGCCTTCTTTTTGATCATTTTGATAGAGGGGGATGAAGAAAGTGGACAAAACAGACTCGCATTTG  
TCATCGGACAAATACAGGAAAAGAATCATATTGAAAACGCTCCTAACCCAACCCCTTCTTCGTAGAGCCCG  
TGTATTGTAAGTGATCCGAACCTGCCCGGAGCGAGCCTCCCATAGAGGCAAGTGAAGTTGGTGAGCCGTATG  
ATGGGCAACTATCTCCTGCGTTTCGGAGAGGACTCAGCTTTAGTTAGTACCCCTTGGTTTCGGGGTGACCT  
TTTCACTCTATTTTATTATATACGCTTAGCGAAAAGAATGTTTTTTGATACACCTAGGACATGGATTCTATATG  
AACCAATGGATCGTGACAAGTCGTTAGTACTAGCAATGACTTCCTCTTTCATTACTTCATTCTTTCCATATCCC  
TCTCCTTTGTTT

>TCONS\_00039527

GGATTTAGAAGGCTTGTTCAAAAGAAAAAAGACGTGGGTGGCATTATGACTGGGGTGTCAGTTAGAAAGGT  
TCTTACAATGTTTCGTTCAATCAAGCAGCATTCTTTTTTTCTTAACTTAAGGAGAGGGAAGAGGGCTTTCTAAGA  
AGGGCTTGGGACCTATGAACAGAACACAACAAAATGATGAAATGAAGAAGAATGAACCGGAGGTATC  
GGAGGACG

>TCONS\_00039615

CACCAACTTCACTTGCCTCTATGGGAGGCTCGCTCCGGGCAGGTTCCGATCACTTACAATACACGGGCTCTAC  
GAAGGAAGGGGTTGGGTAGGAGCGTTTTCAATATGATTCTTTTCCTGTATTTGTTTCGATGAGAAATGCAAGT  
GGCTCACCAACTTCACTTGCCTCTATGGGAGGCTCGCTCCGGGCAGGTTCCGATCACTTACAATACACGGGCT

CTACGAAGGAAGGGGTTGGGTTAGGAGCGTTTTCAATATGATTCTTTTCCTGTATTTGTCCGATGACAAATGC  
GAGTCTGTTTTGTCCACTTTCTTCATCCCCCTCTATCAAAATGATCAAAAAGGAAGGCAAGCTTGCTTCTTATT  
CCCGTGTTTGATCTCTTCCATCTCTGCCTGGCTCGTTGTCACCTATGTTGAAGAAAGGTTTGAACCCTGTAGA  
GAATGAAGAGGGGCCAAGGATCTTCCTCTCAACAGTGCTTTTCGAGGCTCCCCCT

>TCONS\_00039616

TCACCAACTTCACTTGCCTCTATGGGAGGCTCGCTCCGGGCAGGTTCCGATCACTTACAATACACGGGCTCTA  
CGAAGGAAGGGGTTGGGTTAGGAGCGTTTTCAATATGATTCTTTTCCTGTATTTGTCCGATGACAAATGCGAG  
TCTGTTTTGTCCACTTTCTTCATCCCCCTCTATCAAAATGATCAAAAAGGAAGGCAAGCTTGCTTCTTATTCCC  
GTGTTTGATCTCTTCCATCTCTGCCTGGCTCGTTGTCACCTATGTTGAAGAAAGGTTTGAACCCTGTAGAGAA  
TGAAGAGGGGCCAAGGATCTTCCTCTCAACAGTGCTTTTCGAGGCTCCCCCT

>TCONS\_00039617

GACTTGTCACGATCCATTGGTTCATATAGAATCCATGTCCTAGGTGTATCAAAAAACATTCTTTTCGCTAAGCG  
TATATAATAAAATAGAGTGAAAAGGTCCACCCCGAAACCAAGGGGGTACTAACTAAAGCTGAGTCCTCTCC  
GAACCGCAGGAGATAGTTGCCCATCATACGGCTCACCAACTTCACTTGCCTCTATGGGAGGCTCGCTCCGGG  
CAGGTTCCGATCACTTACAATACACGGGCTCTACGAAGGAAGGGGTTGGGTTAGGAGCGTTTTCAATATGAT  
TCTTTTCCTGTATTTGTCCGATGACAAATGCGAGTCTGTTTTGTCCACTTTCTTCATCCCCCTCTATCAAAATGA  
TCAAAAAGGAAGGCAAGCTTGCTTCTTATTCCCGTGTTTGATCTCTTCCATCTCTGCCTGGCTCGTTGTCACCT  
ATGTTGAAGAAAGGTTTGAACCCTGTAGAGAATGAAGAGGGGCCAAGGATCTTCCTCTCAACAGTGCTTTT  
CGAGGCTCCCCCT

>TCONS\_00039618

TGCCATTTGATGAGTAACTGTGAACAAAGGAGAGGGATATGGAAAGAATGAAGTAATGAAAGAGGAAGTCA  
TTGCTAGTACTAACGACTTGTACGATCCATTGGTTCATATAGAATCCATGTCCTAGGTGTATCAAAAAACAT  
TCTTTTCGCTAAGCGTATATAATAAAATAGAGTGAAAAGGTCCACCCCGAAACCAAGGGGGTACTAACTAAA  
GCTGAGTCCTCTCCGAACCGCAGGAGATAGTTGCCCATCATACGGCTCACCAACTTCACTTGCCTCTATGGGA  
GGCTCGCTCCGGGCAGGTTCCGATCACTTACAATACACGGGCTCTACGAAGGAAGGGGTTGGGTTAGGAGCG  
TTTTCAATATGATTCTTTTCCTGTATTTGTCCGATGACAAATGCGAGTCTGTTTTGTCCACTTTCTTCATCCCCCT  
CTATCAAAATGATCAAAAAGGAAGGCAAGCTTGCTTCTTATTCCCGTGTTTGATCTCTTCCATCTCTGCCTGGC  
TCGTTGTCACCTATGTTGAAGAAAGGTTTGAACCCTGTAGAGAATGAAGAGGGGCCAAGGATCTTCCTCTC  
AACAGTGCTTTTCGAGGCTCCCCCT

>TCONS\_00039619

CTCCGGTTCATTCTTCTTCATTTTCATCATTTTGTGTGTGTGTTCTGTTTCATAGGTCCCAAGCCCTTCTTAGAAAGC  
CCCAAGTCAGTAAAGTAGTTAACCACCAACACAAGTAAGAAGTTCGTCAGTCCTTCCTCCGATGCCTCCCGTTCA  
TTCTTCTTCATTTTCATCATTTTGTGTGTGTGTTCTGTTTCATAGGTCCCAAGCCCTTCTTAGAAAGCCCTCTTCCCT  
CTCCTTAAGTTAAGAAAAAAGAATGCTGCTTGATTGAACGAACATTGTAAGAACCTTTCTAACTGACACCC  
CAGTCATAATGCCACCCACGTCTTTTTTTCTTTTGAACAAGCCTTCTAAATCC

>TCONS\_00039620

CTCCGATACCTCCGGTTCATTCTTCTTCATTTTCATCATTTTGTGTGTGTGTTCTGTTTCATAGGTCCCAAGCCCTTC  
TTAGAAAGCCCTCTTCCCTCTCCTTAAGTTAAGAAAAAAGAATGCTGCTTGATTGAACGAACATTGTAAGA  
ACCTTTCTAACTGACACCCACGTCATAATGCCACCCACGTCTTTTTTTCTTTTGAACAAGCCTTCTAAATCC

>TCONS\_00039660

GCGGTTCCCTCCGGTCCGTCCCCAGGTTTGGTTAGGGGAACATCCGAGCGATTGCCTTCGCGGATCCAAACGC  
GCTCACAAGGCGCACAATAAGAATAAGACCAATAGAGACTTCATAAGGGACCATTGAGCTGCAGATCGTA



ATGCTCCTAGAGAGGCATATTTCTGAATACAGAGGAGTGAAAGTTCCCAACAAATAAGTACTTTTTTCATATACT  
TCTATGAACCGTACGAGTGCGTGCTCTGTACCCCCCATCGCGCTTACGGCTCTATACCCCAACCCAACTTGC  
TCTGGCCCCGGTGAAAGTTCCCAACAAATAAGTACTTTTTTCATATCCTTCTATGAACCGTACGAGCACGTCCT  
CTGTACCCCCCACC GCGCTTACGGCTCTATACCCCAACCCAACTTGCTCTGGCCCCGGGTCCTTCTTTCTAT  
TCCTCGGTAAGCGGACCGTGGGAGCATGGGGGGCGATATCCGCTTTTGACTGATAGAAAGCATCTCTCTTTTG  
TCCCTCCTGACCGAACTCGCCAAAAAATCACAATAGAAAAAGTTGTTCTTGCCGGGAGAGTAGCGTCGGAG  
ACATCTTTATCTGAGGAGGAGGCTTCGTCTCGGCTCCTCATAAATGATGTTAGGATCGGCCGGCTCATCCT  
CGGAATCCGAAAAGAAAACAGAGACAGAACGGAATCACTTTGTTTCAGTGACATATCTAATCAGACTGAAT  
AGGATTTGAAGAGCTGTACGATCATTCACAAAAATTCAGTGAAGTATTGAAGCTATCAGTGTGATTGATCA  
GACAAGTACCAAGGGCTTTTCGGTAGACTTCTTTC

>TCONS\_00039661

GCGGTTCCCTCCGGTCCGTTCCTCAGGTTTGGTTAGGGGAACATCCGAGCGATTGCCTTCGCGGATCCAAACGC  
GCTCACAAGGCGCACAATAAGAATAAGACCAATAGAGACTTCATAAGGGACCATTGAGCTGCAGATCGTA  
ATGCTCCTAGAGAGGCATATTTCTGAATACAGAGGAGTGAAAGTTCCCAACAAATAAGTACTTTTTTCATATCCT  
TCTATGAACCGTACGAGCACGTCCTCTGTACCCCCCACC GCGCTTACGGCTCTATACCCCAACCCAACTTGC  
TCTGGCCCCGGGTCCTTCTTTCTATTCTCGGTAAGCGGACCGTGGGAGCATGGGGGGCGATATCCGCTTTTG  
ACTGATAGAAAGCATCTCTCTTTTGTCCTCCTGACCGAACTCGCCAAAAAATCACAATAGAAAAAGTTGTT  
CTTGCCGGGAGAGTAGCGTCGGAGACATCTTTATCTGAGGAGGAGGCTTCGTCTCGGCTCCTCATAAATGA  
TGTTAGGATCGGCCGGCTCATCCTCGGAATCCGAAAAGAAAACAGAGACAGAACGGAATCACTTTGTTTCAG  
TGACATATCTAATCAGACTGAATAGGATTTGAAGAGCTGTACGATCATTCACAAAAATTCAGTGAAGTATT  
GAAGCTATCAGTGTGATTGATCAGACAAGTACCAAGGGCTTTTCGGTAGACTTCTTTC

>TCONS\_00039662

GCTGCGGTTCCCTCCGGTCCGTTCCTCAGGTTTGGTTAGGGGAACATCCGAGCGATTGCCTTCGCGGATCCAAA  
CGCGCTCACAAGGCGCACAATAAGAATAAGACCAATAGAGACTTCATAAGGGACCATTGAGCTGCAGATC  
GTAATGCTCCTAGAGAGGCATATTTCTGAATACAGAGGAGTGAAAGTTCCCAACAAATAAGTATTTTTTCATATC  
CTTCTATGAACCGTACGAGCACGTCCTCTGTACCCCCCACC GCGCTTACGGCTCTATACCCCAACCCAACTT  
GCTCTGGCCCCGGGTCCTTCTTTCTATTCTCGGTAAGCGGACCGTGGGAGCATGGGGGGCGATATCCGCTT  
TTGACTGATAGAAAGCATCTCTCTTTTGTCCTCCTGACCGAACTCGCCAAAAAATCACAATAGAAAAAGTT  
GTTCTTGCCGGGAGAGTAGCGTCGGAGACATCTTTATCTGAGGAGGAGGCTTCGTCTCGGCTCCTCATAAA  
TGATGTTAGGATCGGCCGGCTCATCCTCGGAATCCGAAAAGAAAACAGAGACAGAACGGAATCACTTTGTTT  
CAGTGACATATCTAATCAGACTGAATAGGATTTGAAGAGCTGTACGATCATTCACAAAAATTCAGTGAAC  
TATTGAAGCTATCAGTGTGATTGATCAGACAAGTACCAAGGGCTTTTCGGTAGACTTCTTTC

>TCONS\_00039663

ACAACTCAAATGAGCCTTGCGATGAGACGCGGACATTCCCCATGCTGCGGTTCCCTCCGGTCCGTTCCTCAGG  
TTTGGTTAGGGGAACATCCGAGCGATTGCCTTCGCGGATCCAAACGCGCTCACAAGGCGCACAATAAGAATA  
AGACCAATAGAGACTTCATAAGGGACCATTGAGCTGCAGATCGTAATGCTCCTAGAGAGGCATATTTCTGAA  
TACAGAGGAGTGAAAGTTCCCAACAAATAATACTTTTTTCATATCCTTCTATGAACCGTACGAGCACGTCCTCT  
GTCACCCCCCACC GCGCTTACGGCTCTATACCCCAACCCAACTTGCTCTGGCCCCGGGTCCTTCTTTCTATTCT  
CTCGGTAAGCGGACCGTGGGAGCATGGGGGGCGATATCCGCTTTTGACTGATAGAAAGCATCTCTCTTTTGTC  
CCTCCTGACCGAACTCGCCAAAAAATCACAATAGAAAAAGTTGTTCTTGCCGGGAGAGTAGCGTCGGAGA  
CATCTTTATCTGAGGAGGAGGCTTCGTCTCGGCTCCTCATAAATGATGTTAGGATCGGCCGGCTCATCCTC  
GGAATCCGAAAAGAAAACAGAGACAGAACGGAATCACTTTGTTTCAGTGACATATCTAATCAGACTGAATA

GGATTTGAAGAGCTGTCACGATCATTCACAAAAATTCAGTGAAGCTATTGAAGCTATCAGTGTGATTGATCAG  
ACAAGTACCAAGGGCTTTCGGTAGACTTCTTTC

>TCONS\_00039664

GCACTCATCAGTCAGCTCGGCCCCGGCCGTCCCATCTCATCTTGATTGGCTATACTTGTATGTAGCCAGCCATG  
TTAGCTCCACATGAGAGCCTTTTAAATAAAGGCTAAAAAGGCACTCATCAGTCAGCTCGGCCCCCTTTCCTATT  
TCGCTTTGCCGCCTATTAAGAGAATAGGTCCCGAAAAAGCGGCCCCGCCTTTCATCATCTATACCAGCTGCCAC  
GCAAGAACCAATAGAAAGGATTTGACGCCCCCTCTCGTCATAAGAAGCAGAACGCGCCATCACCTACAGCC  
CTTTCCTCTGCCGGGGACTTCCACGAAATGAAAACGGGCGGCATCGTCGTATGCTCCACTTTTGTGCCCCTGGT  
TTATATCCCGGAGTACTCTATGGCCGATCTGTCACCCAACCTACTTAAACAACCTAAAGGCTTGGCCCCGTC  
CCGTTTGGAGAATGACCCCTTATGGCACGGCTTAGTCAGTTATTCTCGCAGTTCAGATAAGATTTCGGACCGGG  
TTGGGTTAGGTCTCTGAAAGCATGGTTCTTGCCTCCCTCCCCCTTTGAGCTCGTCCATTTCGTTGGGTGATCCCT  
TGCTCTCACGTTTCGAGTGTGTTGCTCGTCGTTTAGGCCCGTGAGTGAGATTCTGCTCATTGCAGTCACCTCCGG  
GGTCTTCGCACCTGGATAGTACCAGGACCCCTTGTCGCCCGGCCCTTGATCAGATAAAGCTGCCCGCCTTATG  
ACCCACAACTAAAAATGAGCCTTGCGACGAGACGCGGACATTCCCCATGCTGCGGTTCCCTCCGGTCCGTT  
CCCGGGTTGGGTTAGGGGAACATCCGAGCGATTGCCTTCGCGGATCCAAACGCGCTCACAAGGCGCACAATA  
AGAATAAGACCAATAGAGACTTCATAAGGGACCATTGAGCTGCAGATCGTAATGCTCCTAGAGAGGCATAT  
TTCGAATATAGAGGAGTGAAAGTTCCCAACAAATAAGTACTTTTTCATATCCTTCTATGAACCGTACGAGCAC  
GTCCTCTGTACCCCCCACC GCGCTTACGGCTCTATACCCCAACCCAACTTGCTCTGGCCCCGGGTCCTTCTT  
TCTATTCTCGGTAAGCGGACCGTGGGAGCATGGGGGGCGATATCCGCTTTTGACTGATAGAAAGCATCTCTC  
TTTTGTCCCTCCTGACCGAACTCGCCAAAAAAATCACAATAGAAAAAGTTGTTCTTGCCGGGAGAGTAGCGT  
CGGAGACATCTTTATCTGAGGAGGAGGCTTCGTCGTCCGGCTCCTCATAAATGATGTTAGGATCGGCCGGCTC  
ATCCTCGGAATCCGAAAAGAAAACAGAGACAGAACGGAATCACTTTGTTTCAGTGACATATCTAATCAGACT  
GAATAGGATTTGAAGAGCTGTCACGATCATTCACAAAAATTCAGTGAAGCTATTGAAGCTATCAGTGTGATTG  
ATCAGACAAGTACCAAGGGCTTTCGGTAGACTTCTTTC

>TCONS\_00039665

AGCCTTTTAAATAAAGGTTAAAACGGCACTCATCAGTCAGCTCGGCCCCCTTTCCTATTTTCGCTTTGCCGCCTAT  
TAAGAGAATAGGTCCCGAAAAAGCGGCCCCGCCTTCTATCATCTATACCAGCTTCCACGCAAGAACCAATAGA  
AAGGATTTGACGCCCCCTCTCGTCATAAGAAGCAGAACGCGCCATCACCTACAGCCCTTTCCTCTGCCGGGG  
GCTTCCATGAAATGAAAACGGGCGGCATCGTCGTATGCTCCACTTTTGTGCCCCTGGTTTATATTCCGGAGTAC  
TCCTATGGCTGATCTGTACCCAACCTACTTAAACAACCTAAAGGCTTGGCCCCGTCCCGTTTGGAGAATGAA  
CCCTTATGGCACGGCTTAGTCAGTTATTCTCGCAGTTCAGATAAGATTTCGGACCGGGTTGGGTTAGGTCTCTG  
AAAGCATGGTTCTTGCCTCCCTCCCCCTTTGAGCTCGTCCATTTCGTTGGGTGATCCCTTGCTCTCACGTTTCGA  
GTGTTTGCTCGTCGTTTAGGCCCGTGAGTGAGATTCTGCTCATTGCAGTCACCTCCGGGGTTCTTCGCACCTG  
GATAGTACCAGGACCCTTGTCGCCCGGCCCTTGATCAGATAAAGCTGCCCGCCTTATGACCCACAACTAAA  
AATGAGCCTTGCGACGAGACGCGGACATTCCCCATGCTGCGGTTCCCTCCGGTCCGTTCCCGGGTTGGGTTAG  
GGGAACATCCGAGCGATTGCCTTCGCGGATCCAAACGCGCTCACAAGGCGCACAATAAGAATAAGACCAAT  
AGAGACTTCATAAGGGACCATTGAGCTGCAGATCGTAATGCTCCTAGAGAGGCATATTCGAATATAGAGG  
AGTGAAAGTTCCCAACAAATAAGTACTTTTTCATATCCTTCTATGAACCGTACGAGCACGTCCTCTGTACCC  
CCCACCGCGCTTACGGCTCTATACCCCAACCCAACTTGCTCTGGCCCCGGGTCCTTCTTTCTATTCTCGGTA  
AGCGGACCGTGGGAGCATGGGGGGCGATATCCGCTTTTGACTGATAGAAAGCATCTCTCTTTTGTCCCTCCTG  
ACCGAACTCGCCAAAAAAATCACAATAGAAAAAGTTGTTCTTGCCGGGAGAGTAGCGTCGGAGACATCTTTA  
TCTGAGGAGGAGGCTTCGTCGTCCGGCTCCTCATAAATGATGTTAGGATCGGCCGGCTCATCCTCGGAATCCG

AAAAGAAAACAGAGACAGAACGGAATCACTTTGTTTCAGTGACATATCTAATCAGACTGAATAGGATTTGAA  
GAGCTGTCACGATCATTCACAAAAATTTCACTGAACTATTGAAGCTATCAGTGTGATTGATCAGACAAGTACC  
AAGGGCTTTTCGGTAGACTTCTTTC

>TCONS\_00039666

AGCCTTTTAAATAAAGGTTAAAACGGCACTCATCAGTCAGCTCGGCCCTTTCTATTTTCGCTTTGCCGCCTAT  
TAAGAGAATAGGTCCCGAAAAAGCGGCCCGCCTTCTATCATCTATACCAGCTTCCACGCAAGAACCAATAGA  
AAGGATTTTCGACGCCCCCTCTCGTCATAAGAAGCAGAACGCGCCATCACCTACAGCCCTTTCTCTGCGGGG  
GCTTCCATGAAATGAAAACGGGCGGCATCGTCGTATGCTCCACTTTTGTGCCCCTGGTTTATATTCCGGAGTAC  
TCCTATGGCTGATCTGTACCCAACTACTTAAACAACCTAAAGGCTTGGCCCCGTCCCGTTTGGAGAATGAC  
CCCTTATGGCACGGCTTAGTCAGTTATTCTCGCAGTTCAGATAAGATTTCGGACCGGGTTGGGTTAGGTCTCTG  
AAAGCATGGTTCTTGCCTCCCTCCCCCTTTGAGCTCGTCCATTCGTTGGGTGATCCCTTGCTCTCACGTTCTGA  
GTGTTTGCTCGTCGTTTAGGCCCGTGAGTGAGATTTCTGCTCATTCAGTCACCTCCGGGGTTCTTCGCACCTG  
GATAGTACCAGGACCTTGTGCCCCGGCCCTTGATCAGATAAAGCTGCCCCGCTTATGACCCACAACTAAA  
AATGAGCCTTGCGACGAGACGCGGACATTCCCCATGCTGCGGTTCCCTCCGGTCCGTTCCTGGGTTGGGTTAG  
GGGAACATCCGAGCGATTGCCTTCGCGGATCCAAACGCGCTCACAAGGCGCACAATAAGAATAAGACCAAT  
AGAGACTTCATAAGGGACCATTTGAGCTGCAGATCGTAATGCTCCTAGAGAGGCATATTTTGAATATAGAGG  
AGTGAAAGTTCCCAACAAATAAGTACTTTTTTCATATCCTTCTATGAACCGTACGAGCACGTCCTCTGTACCC  
CCCACCGCGCTTACGGCTCTATACCCCAACCCAACTTGCTCTGGCCCCGGGTCTTCTCTTTCTATTCTCGGTA  
AGCGGACCGTGAGCATGGGGGGCGATATCCGCTTTTGAAGTATAGAAAGCATCTCTCTTTTGTCCCTCCTG  
ACCGAACTCGCCAAAAAATCACAATAGAAAAAGTTGTTCTTGCCGGGAGAGTAGCGTCGGAGACATCTTTA  
TCTGAGGAGGAGGCTTCGTCTCGTCCGGCTCCTCATAAATGATGTTAGGATCGGCCGGCTCATCCTCGGAATCCG  
AAAAGAAAACAGAGACAGAACGGAATCACTTTGTTTCAGTGACATATCTAATCAGACTGAATAGGATTTGAA  
GAGCTGTCACGATCATTCACAAAAATTTCACTGAACTATTGAAGCTATCAGTGTGATTGATCAGACAAGTACC  
AAGGGCTTTTCGGTAGACTTCTTTC

>TCONS\_00039667

GCCATGTTAGCTCCACATGAGAGCCTTTTAAATAAAGGCTAAAAAGGCACTCATCAGTCAGCTCGGCCCTTT  
CCTATTTTCGCTTTGCCGCCTATTAAGAGAATAGGTCCCGAAAAAGCGGCCCGCCTTTTCATCATCTATACCAGC  
TGCCACGCAAGAACCAATAGAAAGGATTTTCGACGCCCCCTCTCGTCATAAGAAGCAGAACGCGCCATCACCT  
ACAGCCCTTTCTCTGCCGGGGACTTCCACGAAATGAAAACGGGCGGCATCGTCGTATGCTCCACTTTTGTG  
CCCTGGTTTATATCCCGGAGTACTCCTATGGCCGATCTGTACCCAACTACTTAAACAACCTAAAGGCTTGG  
CCCCGTCCCGTTTGGAGAATGACCCCTTATGGCACGGCTTAGTCAGTTATTCTCGCAGTTCAGATAAGATTCTG  
GACCGGGTTGGGTTAGGTCTCTGAAAGCATGGTTCTTGCCTCCCTCCCCCTTTGAGCTCGTCCATTCTGTTGGG  
TGATCCCTTGCTCTCACGTTTCGAGTGTTGCTCGTCGTTTAGGCCCGTGAGTGAGATTTCTGCTCATTGCAGTCA  
CCTCCGGGGTTCTTCGCACCTGGATAGTACCAGGACCTTGTGCCCCGGCCCTTGATCAGATAAAGCTGCCCC  
CCTTATGACCCACAACTAAAAATGAGCCTTGCGACGAGACGCGGACATTCCCCATGCTGCGGTTCCCTCCG  
GTCCGTTCCTGGGTTGGGTTAGGGGAACATCCGAGCGATTGCCTTCGCGGATCCAAACGCGCTCACAAGGCG  
CACAATAAGAATAAGACCAATAGAGACTTCATAAGGGACCATTTGAGCTGCAGATCGTAATGCTCCTAGAG  
AGGCATATTTTGAATATAGAGGAGTGAAAGTTCCCAACAAATAAGTACTTTTTTCATATCCTTCTATGAACCGT  
ACGAGCACGTCCTCTGTACCCCCCACCAGCGCTTACGGCTCTATACCCCAACCCAACTTGCTCTGGCCCCGGG  
TCCTTCTTTCTATTCTCGGTAAGCGGACCGTGAGCATGGGGGGCGATATCCGCTTTTGAAGTATAGAAA  
GCATCTCTCTTTTGTCCCTCCTGACCGAACTCGCCAAAAAATCACAATAGAAAAAGTTGTTCTTGCCGGGAG  
AGTAGCGTCGGAGACATCTTTATCTGAGGAGGAGGCTTCGTCTCGGCTCCTCATAAATGATGTTAGGATCG

GCCGGCTCATCCTCGGAATCCGAAAAGAAAACAGAGACAGAACGGAATCACTTTGTTTCAGTGACATATCTA  
ATCAGACTGAATAGGATTTGAAGAGCTGTCACGATCATTACAAAAATTTTCAGTGAACATTGAAGCTATCA  
GTGTGATTGATCAGACAAGTACCAAGGGCTTTCGGTAGACTTCTTTC

>TCONS\_00039668

GCCATGTTAGCTCCACATGAGAGCCTTTTAAATAAAGGTTAAAACGGCACTCATCAGTCAGCTCGGCCCCCTT  
CCTATTTTCGCTTTGCCGCCTATTAAGAGAATAGGTCCCGAAAAAGCGGCCCGCCTTCTATCATCTATACCAGC  
TTCCACGCAAGAACCAATAGAAAGGATTTTCGACGCCCCCTCTCGTCATAAGAAGCAGAACGCGCCATCACCTA  
CAGCCCTTTCCTCTGCCGGGGACTTCCACGAAATGAAAACGGGCGGCATCGTCGTATGCTCCACTTTTGTGTC  
CCTGGTTTATATCCCGGAGTACTCCTATGGCCGATCTGTACCCCAACCTACTTAAACAACCTAAAGGCTTGGC  
CCCGTCCCGTTTGGAGAATGACCCCTTATGGCACGGCTTAGTCAGTTATTCTCGCAGTTCAGATAAGATTTCGG  
ACCGGGTTGGGTAGGTCTCTGAAAGCATGGTTCTTGCCCTCCCTCCCCCTTTGAGCTCGTCCATTTCGTTGGGT  
GATCCCTTGCTCTCACGTTTCGAGTGTGCTCGTCGTTTAGGCCCGTGAGTGAGATTTCTGCTCATTGCAGTCA  
CCTCCGGGGTTCTTCGCACCTGGATAGTACCAGGACCCCTTGTGCCCCGGCCCTTGATCAGATAAAGCTGCCCC  
CCTTATGACCCACAACTAAAAATGAGCCTTGCGACGAGACGCGGACATTCCCCATGCTGCGGTTCCCTCCG  
GTCCGTTCCCGGGTTGGGTAGGGGAACATCCGAGCGATTGCCTTCGCGGATCCAAACGCGCTCACAAAGGCG  
CACAATAAGAATAAGACCAATAGAGACTTCATAAGGGACCATTTCAGCTGCAGATCGTAATGCTCCTAGAG  
AGGCATATTTTGAATATAGAGGAGTGAAAGTTCCCAACAAATAAGTACTTTTTCATATCCTTCTATGAACCGT  
ACGAGCACGTCCTCTGTACCCCCCACC GCGCTTACGGCTCTATACCCCAACCCAACTTGCTCTGGCCCCGGG  
TCCTTCCTTTCTATTTCCTCGGTAAGCGGACCGTGAGGAGCATGGGGGGCGATATCCGCTTTTGAAGTATAGAAA  
GCATCTCTCTTTTGTCCCTCCTGACCGAACTCGCCAAAAAAATCACAATAGAAAAAGTTGTTCTTGCCGGGAG  
AGTAGCGTCGGAGACATCTTTATCTGAGGAGGAGGCTTCGTCGTCCGGCTCCTCATAAATGATGTTAGGATCG  
GCCGGCTCATCCTCGGAATCCGAAAAGAAAACAGAGACAGAACGGAATCACTTTGTTTCAGTGACATATCTA  
ATCAGACTGAATAGGATTTGAAGAGCTGTCACGATCATTACAAAAATTTTCAGTGAACATTGAAGCTATCA  
GTGTGATTGATCAGACAAGTACCAAGGGCTTTCGGTAGACTTCTTTC

>TCONS\_00039669

CTGAGCCATTCCCATCCCAAGTGCTGCCCCGATTGCGCCTGGCCGGTCGGGAAGAGATTCACATAGAGACTA  
CTGCTATCCGGGAATCTCTTTCTATGTTAGCTAGCGGGGGCGGGCTTTCCTATGGCAGTCCCGCTGCGGCCTAT  
GAACGGCCGTCCCATCTCATCTTGATTTGTCTATACTTGTATATAGCCAGCCATGTTAGCTCCACATGAGAGCC  
TTTTAAATAAAGGTTAAAACGGCACTCATCAGTCAGCTCGGCCCCCTTTCCTATTTTCGCTTTGCCGCCTATTAAG  
AGAATAGGTCCCGAAAAAGCGGCCCGCCTTTCATCATCTATACCAGCTGCCACGCAAGAACCAATAGAAAG  
GATTTTCGACGCCCCCTCTCGTCATAAGAAGCAGAACGCGCCATCACCTACAGCCCTTTCCTCTGCCGGGGACTT  
CCACGAAATGAAAACGGGCGGCATCGTCGTATGCTCCACTTTTGTGCCCCTGGTTTATATCCCGGAGTACTCC  
TATGGCCGATCTGTACCCCAACCTACTTAAACAACCTAAAGGCTTGGCCCCGTCCCGTTTGGAGAATGACCCC  
TTATGGCACGGCTTAGTCAGTTATTCTCGCAGTTCAGATAAGATTTCGGACCGGGTTGGGTAGGTCTCTGAAA  
GCATGGTTCTTGCCCTCCCTCCCCCTTTGAGCTCGTCCATTTCGTTGGGTGATCCCTTGCTCTCACGTTTCGAGTGT  
TTGCTCGTCGTTTAGGCCCGTGAGTGAGATTTCTGCTCATTGCAGTCACCTCCGGGGTTCTTCGCACCTGGATA  
GTACCAGGACCCCTTGTCGCCCGGCCCTTGATCAGATAAAGCTGCCCCGCTTATGACCCACAACTAAAAATG  
AGCCTTGCGACGAGACGCGGACATTCCCCATGCTGCGGTTCCCTCCGGTCCGTTCCCGGGTTGGGTAGGGGA  
ACATCCGAGCGATTGCCTTCGCGGATCCAAACGCGCTCACAAAGGCGCACAATAAGAATAAGACCAATAGAG  
ACTTCATAAGGGACCATTTCAGCTGCAGATCGTAATGCTCCTAGAGAGGCATATTTTGAATATAGAGGAGTG  
AAAGTTCCCAACAAATAAGTACTTTTTCATATCCTTCTATGAACCGTACGAGCACGTCCTCTGTACCCCCCA  
CCGCGCTTACGGCTCTATACCCCAACCCAACTTGCTCTGGCCCCGGGTCCTTCCTTTCTATTTCCTCGGTAAGCG

GACCGTGGGAGCATGGGGGGCGATATCCGCTTTTACTGATAGAAAGCATCTCTCTTTTGTCCCTCCTGACCG  
AACTCGCCAAAAAATCACAATAGAAAAAGTTGTTCTTGCCGGGAGAGTAGCGTCGGAGACATCTTTATCTG  
AGGAGGAGGCTTCGTCGTCCGGCTCCTCATAAATGATGTTAGGATCGGCCGGCTCATCCTCGGAATCCGAAA  
AGAAAACAGAGACAGAACGGAATCACTTTGTTTCAGTGACATATCTAATCAGACTGAATAGGATTTGAAGAG  
CTGTCACGATCATTACAAAAATTCAGTGAAGCTATTGAAGCTATCAGTGTGATTGATCAGACAAGTACCAAG  
GGCTTTCGGTAGACTTCTTTC

>TCONS\_00039713

CTTTGAAGAATGTAAATCTTGCATACATTCAACCTGCGTCTTTAGCAAGGGGACGAGGGCAAAGCTTTTGATC  
TTTGGGCTCTGCAAAAGTAAATGTTGACAAAAAAAATCTGTTTGGAGAGATTAAAAATTACAACCTCAGGGGC  
TTCTAGGCAGAATAAGCTAGCACATAATAGTAATAATCTTATGCCTCCTGGTTTTGATATGATGGAAGAAGAT  
GTTCCCTTCACTCAAGAAGCTGAAATGATGCAAGAAGTTGGAGCTACTTCGAAGAATGTACGAGACAC

>TCONS\_00039714

AGCTCGGTAAGCTTTTACTATTAGCTTTTGTGTTGCTAATTCTATTTATTCATAGCAAAACGATTTCCAATATCA  
GGCTAAGAATTGCTAGGTGTTCCACAAGAAGACATCACTCATTGAGGCTCCACCTTCTTGCCTTCTCTGGTTG  
ACATGAATCCATCAAAGTCTGAAATGGGAGCAACTTCAAAGAATGTACATCATGCATATATTCAACC

>TCONS\_00039726

CTTTTAGTTTCTTCTCCTTCTAAGTTCATTCTACTACGTATAAGCTTTCACTTTGTTCCAAACACAAAATTTG  
AAAAGGAATTTTCTTACATTTATTTGAAGCATGTCAAGCAGAAGATCCAGAGATTCCGAGTCTTCGAGGATTT  
CAGATGATCAGATCATCGAACTTGTATCCAAATTGCAACAACCTTCTCCCTGAGATTTCGAACTCGCCGTTCCAG  
CAAGGCATCAGCATCAAAGGTGCTCCAAGAACTTGCAACTACATAAGAAGCTTGAACAGAGAAATGGATG  
ACCTTAGTGATCGACTCTCTCAGTTACTATCCACTTTAGATGCTGACAGTCCAGAAGCTGCAATTATCCGCAG  
TTTGATAATATGATTTATATATTACAAGTATTCTACTAACTAGTTGAGAGAGTTAGTCATGAGTGGTTT

>TCONS\_00039739

AAATCCTATTGCTTTTCTGGGTTTCTAAGGATAAGCAATTTCAATTGTTTCACTTAGAATTGGTGAAACACAAGA  
AAGAACAACAACAACCGTGGCGAATAGAGCAAAGTAAAGAACAGCATGCTGTGGTGTAGTTTATCTGTTG  
ACGTCTATCGGAAAGTCATCTCCTTGAACCTTGATTGCCGTGTCATTCTGTAAAATACCCTTTTTCAGAAATCA  
CTTCTTTGTTATAGATTACTGTTTCTTTTGTTCACCTTGAAAAATCAAGTCTTCATA

>TCONS\_00039740

CTTTTGTCTTCTGATTGTTCTGTTGGAAGATTGAGGTGTTTGTATTGAGTGAAAAGGGTTGGGAACAAGTAGTT  
ATGGTGTGTCAAGCAGCTGGCCAGACGAGATTTGAGCATTGAAACATGAAAATGGAATTGCTGGGTCTGCC  
ACCATAATAGTTAGAGTCATAGCATGCTTTCAACCACTCCAAGATTGCCAGGCTGAATACTTCCGTCATTTGC  
TTAAACCCGTCACGTAGATTGACCTTTCTTTTACC GCGTTCAAGTTAAGCTGGAGTTTTTAGTTTTTTTCGTTG  
TTTATCAAGAGTGCAAGAAATAAACAGCAATTCGTAGT

>TCONS\_00039747

ATGAAGACTTGATTTTTCAAGGTGAACAAAAGAAACAGTAATCTATAACAAAGAAGTGATTTCTGAAAAAG  
GGTATTTTACAGAATGACACGGCAATACAAGTTCAAGGAGATGACTTTCCGATAGACGTCAACAGATAAACT  
ACACCACAGCATGCTGTTCTTTACTTTGCTCTATTGCCACGGTTGTTGTTTGTCTTTCTTGTGTTTCACCAATT  
CTAAGCTGAACAATGAAATTGCTTATCCTTAGAAACCCAGAAAAGCAATAGGATTT

>TCONS\_00039748

TACGAATTGCTGTTTATTTCTTGCCTCTTGATAAACAACGAAAAAACTAAAACTCCAGCTTAACTTGAAC  
GCGGTAAAAAGAAAGGTCAATCTACGTGACGGGTTTAAAGCAAATGACGGAAGTATTCAGCCTGGCAATCTTG  
GAGTGGTTGAAAGCATGCTATGACTCTAACTATTATGGTGGCAGACCCAGCAATTCCATTTTCATGTTTCAAT

GCTCGAAATCTCGTCTGGCCAGCTGCTTGACACACCATAACTACTTGTTCCCAACCCTTTTCACTCAATACAA  
ACACCTCAATCTTCCAACAGAACAAATCAAGAAACAAAAG

>TCONS\_00039831

ATACTTCTTCCTCTCATCAATCCTCCTTTAATAACGGATGGCTGCTGGATTCCATAAGCATCTCATTCTCCTTCG  
CTCAAGATTGGTACGATGAGTGGTTTCAACTGTGCAAGATACACAATCGCCCACATCATCCAACAGCATACT  
GTAGCAGTTATAATCAATGTCAGGTGTAACAGATTAGTGGAAGGCCCTCTGTTGCAGCAGATTCCAGCACAG  
AA

>TCONS\_00039849

GTCAGATTTTGGATGTTTGGCCTCGGCATGTTTCCTTGCACTTCACCTCTGACGTTGTGCACATAAATGCCTGCA  
TACATACCTTGCACTGGATATTCATGGCCTGCTTGTTCTTTTCAAGTTGGCTTCCTTTTTGGGCTTTCATCTTCTC  
GAGGTTCTCTCGCGAGCCATCTTCGCTTTCTGACCATTGCCTCCACCCATGGTTG

>TCONS\_00039882

CTTCTATAACACCCACTACTCTTATTCACTATCTCCATAACTTCCACTACTCCAATACTTATGGTTGTAACTCCC  
ATACCTCCATGATCTCCCCCATGATCTTCCTCCATGATCTCAAAAGCTTAATGACATATTTATGGAATTCTTTT  
GGTATACCTCTATGTAGTACTATAAATAGAGGATGAGAAGCCATTTTGTAAATACACTGAATACATGGAAGA  
AAT

>TCONS\_00039936

CTGATATTTAGAGAATCTTTAGTTTCCCTTAAAAGGGAAGTTATTTGGTATTGGAATGAAATGGACATGAATA  
GAGTAAAGTTGATATAGAGAATTCATTTAGCCGACCCCAATTAATATTGAAAAGACTTGGAAGGCTATGTGA  
ACTCTTGGTCTAATTTGCTTTTAAATGGTAATTTGGATGCTTAAAGTCTGGAAATCTCGTTTACTCTCAATGCAT  
GTATTAACCTTTTAGCAGTGAAACTTTTTCTCTTGTTGATTTTATCATCTGAACGCCACTGATTCATTACGCTCCT  
CATGTAGAGTACACATCCACAACGAGGAGGTGAAGTGAATCTAACTTTGGGAGGAATTGACTTGAATAATTC  
AGGGAGTGTTGTCGTTAGAGAAGATAAAAAGCTTTTGACTGTGATGTTTCCCGATGGACGTGATGGGCGAGC  
TTTTACTCTTAAGGAACCTTTAATGCATGTTACAAGCAATTTACTTGGAGGAG

>TCONS\_00039939

CGGATGGCTGCAGCTGCTTCTGCCATTGCAACTGGAGGTGGCTGGGGAGGAACCCAGGATCGCTGAACTGGT  
CGTGCCTCGGCTGGTGGAGCAGTAGATCCAACTTCTGTTCGTTACAGCTTCAATTTCTGTTATTCTGGCATT  
CTTGCGTTGCCACCATGGCGTTGAACTGTCTCTATTCGTCGGATTGTTTTGATACCCATAATTCAAGCCATCGC  
CACTCCCTTGAGATTGGAGAAGATTCCCTGAACTGTTTTGACTTTGGCCAATTTCCCAAGGCTTAGGCTTTGGA  
CCAACACGAGGCTCTGGTACAGGCTGGTTAGGATTTGGTGGCTGGTCATTTATATCTCGGATGTTTCGAGGGCT  
TTTCTCCTCTTTGAATCATAGCCATGATGTCCATATAAGATTTTGGGTGGGGTGCAACAGATGGTTCCACAGAT  
GCAGGTGGTGACAAAGATCTCACT

>TCONS\_00039940

TTTTGTAAGGCACTGCTCATTGATTTTCATCTCTCGAACTTGGTAGTTTAAACAGGTTTGTAGCTCCTCAAAGTAC  
CTTTTCTCTTCAGTTTTAGATGCCAGCATCTCCTGACTTGACACGGGCCACATCAGCAGCAGCTGCTGCAGCTGC  
TTTTGCAGCAAGAGCCGCTTCTTCTGCTAAACTTGGTCTTCCCTTCACAGCGCCTTTTTCATCTTCTTCTTCCATT  
ACAACCTTGCGAATCCAAGACTTAAACCGGGGTATAATCGTGTGCTTGAAAAGTAAAGCTGTACCAGCTCCT  
GAAGCAGCAAGTATACCTACAGCCATTACCGCATGAGTCCAGTGGAATGAGAGAAATATCCCATTTTTTGTC  
ATGGTATTACTATGTAAAGCTGATGCAGGCAGGAGATTCTGCGATGCAGCCAGTGTTTGAGTAGTCGACGAA  
GATTCA

>TCONS\_00039941

CTTCAGTAATAATTAAGCCAAGATCGAAGGTCAAACATCAGAAAGTTACCTACCGGAACTCGACGAAATGCT  
TCATCTATCTCCTCCTTTGTGAGCCCCCTTCCTCTCAAGGAAAGAACGCCTATACATGACTGGAGATCCCCTAA  
CTCTTGGATGTGAAAGAACTTGACAGCATTTTGGACTTGATCCTCCCGAACTGGTTCCGAGTTTACAAATAC  
AGAAGTTGGAGAGTCCCCTCTTGCAGCCTCAGGCTTGTAATCAAGATTATCTTTAGCAGCTGGTTGAGAAGCG  
GTTGCCTGATTTTGGGAATTGTCGTTGGGGGAAGAATCTGATTCAGTCGCCATACTCACCAACTCCTGTGAAC  
TGAATTTTCAGGGAAATAAAGATTAAAG

>TCONS\_00039942

CCGGAACCTCGACGAAATGCTTCATCTATCTCCTCCTTTGTGAGCCCCCTTCCTCTCAAGGAAAGAACGCCTATA  
CATGACTGGAGATCCCCTAACTCTTGGATGTGAAAGAACTTGACAGCATTTTGGACTTGATCCTCCCGAACT  
GGTTCCGAGTTTACAAATACAGAAGTTGGAGAGTCCCCTCTTGCAGCCTCAGGCTTGTAATCAAGATTATCTT  
TAGCAGCCTGATTTTGGGAATTGTCGTTGGGGGAAGAATCTGATTCAGTCGCCATACTCACCAACTCCTGTGA  
ACTGAATTTTCAGGGAAATAAAGATTAAAG

>TCONS\_00039952

GGCAGCAATAATAATGTCTGCTTCACGAACGATTTTTTCTGGTTCCTTGGTGCGTGAGTGCACTATAGTAACA  
GTAGCATCTTCCTTCAGAAGCAGCAGAGACACTGGTAATCCAACAATGTTACTTCGACCAACCACAACGGCA  
TTCTTCCCTTTTATGCTAATCCCACCTTCGATGCAAAAAGCTCGATGCATCCCTTGGGCGTGCAAGGGAGGAACA  
GAGGTTGTCTGCCTTTCATTGCAAGCTTGCCAATATTCAGAGGATGAAAGCCATCTACATCCTTTTCCAGACTG  
ATTCACCAAGAAGCTCTCTCTTCATTAATGTGTTTTGGTAACGGAAGTTGTACCAGTATACCATGTACATCAGG  
ATCAGCATTACAGCTCGTGGACCTTGCTAATTAATTCAGCTTCAGCTACGTCCTCTAGCAGGTCTATGTGAAAA  
GACTTAATGCCAAGCTCAGCACACGATTTTCTCTTCATATTCACATAACTTTGAGAATCTTTCCTATTTCTAC  
AATGACTACTGCCAACCCAGGGACCTTGCCATACTTTTCTGAAAGGAGTCGGACTTCAGAAGCAATCTCAGA  
ACGAATAGTTTGAGCAATTGCTTTACCGTCAATGATGGTAGCCTTGTGATCTGATGGCGATGCCATTGTTTCTT  
CAAACGAGAAATAACTTCC

>TCONS\_00039973

TTTTTCTTCTTAAAATCTACATTGACTTGGAAGAGTTTAGAAATGTATATTTGTTTCAATTTGTAGAATTCCTCA  
GAACTAGCTGCTTAAAGTTGATTATTGATATTTTACGTGCTCCTTCTGGTTACTTGATTAGGACCTTATTTTACTC  
TTCGTGATGCATGTATATACTGTTTCATGTGAGAAGTTTCTTTTGGTAGTAACCATTCGAATTTCTTAAAGTTAG  
AGGCTGAGTTCTCTATGGAAGTGCCTGCTTTTGGAGATGTGACAAGGATGGCAGCCTACGTTAGCAGATAATTG  
AATACTTGGCTATATGGACCTTGCTTCGCATAATGCATGTAGACTATCTGTTGCAAAAAGTTTCCCTTCAATAGT  
AAGAATTCAGGGTTGAGTATAGAGCTACAGGCATTGTATGCAACTTGCCACCTTCGAGTAGTGATGAGGGT  
AGCAGCCTATATTGAC

>TCONS\_00040015

CTTTTCCCCACTTGAATATTACCTTAAGAAGTGGCTTTTGGTTCTTGTCTTAATGAAATAATTAATCCATCAC  
GAGCATGTTTTCGTTTGAATCCATCAGAAGTTTCAATCTCAAACGTGTAATTTGTTCTCGGTCTCATCTGTATT  
TTCACCTTCAGAAGCTACACTCGGCACACAGGATGAACTAACTGGAAATGACGAAGTAGTTGTTGAACACTG  
TAATATAATTGACACGAGCTTTTGGAAAGAACATCCAAGAATACTTGATGAGGAGGAGCCATTGCTGACGAT  
TTTGCGGCCCCATAGCAATAAAAATGCTTCGATTGTCTTGATGTTGAAAGAGGAGCTGCTCCCTAAGTTATTAA  
TCATATTCAGTTTTTCATTAGATCAGAAAAATAGTTTCAAATTGTCAAATATGTAGATTAGTCGTTTGCCTTTGA  
TTATTCCCTTTACTCCTTTTTTTTTCTTCTTCTAAGGGTTAGCAAAAACACTCAGAACATTTAGAGCCCGTTTGGAT  
ATAAAAAAAATTTCACTGTTTTGGAAATTAGTGTGTTGGCC

>TCONS\_00040082

CCACCATGGGGTACGCCTGTTCAAGTGACCAGTTTTGATTTCATAAAAAGTTCGTTGGAGTTTCCTTGGTTTTGTT  
AAACTTGAAGGACTTGAGAGGACACTGACTTGCAACTTCTTTAGGTGCATGAAGCTCAATCTGTTGAGTATCT  
TCCAAGTGATCGATCCAATCATGAACCATAAACTGAATCCAAGAAGCAGCGATCATGTAAATTGTTT

>TCONS\_00040152

GTGCTGAGTAATATGAGCACGTCTTACCTCCAGAACATGCATAGACACCAAGCTTGAAAGGATGAGGTATCT  
TACATCAGCACTATCTTTTGCAATATGAGCCCAGCAACCAAATAGAGCTAAAGCCAATGCTCTCTCTTCAACG  
TCTCCGGTGTGCAATACTATCTTTATTCTACTTAGAAGTTCTCTATAGCTATCTATTTTATCCTTCGAAAGGATC  
CCCTTATCTTTTCTCCCCTTGCTCCTCAATCGACTCCTCTGCTTGAGCTCGGACAAGAAAATATTCAAAATGCA  
AAGCTTCATATGTTTGTCCCCTGACTTAAATGCATCTGCAAGCCTAAGGAGGATAGTATTTGCAAATAGCTTA  
TCCTCCCCAGGAATTAAGCCGAATACTTTGTACTCAGCAACACTAAGATTTGACTCTCTACTCCACCACTCAA  
GTTTTGGCCCAATATCTAGTATGGCTTCTGCAGATTTACCAGGTTTATTAGAACGGAGGCCCTTTTCAAGGTCA  
ATGCTCCACTGCATCGCACAAGCCGATGGAGTTCTCTCCATTCTTATCGTCTCTGGAGGACAATGAGCTTGAG  
CGGA

>TCONS\_00040207

CACCAACTGTCAGTAATTTCTCTCTAACTCATCCTTCATTTGATCTTCGAGCAAGTATCGGAGCACAAGCAC  
TAAGTATGCACCAAGGCGCATCATTTGTGGGTACCATGAGGTCTGAAGAAGGTTGCATCATCTTCAGAAGG  
CGATATCCAAGACCATATGACGTCCAGCAAACCTTGGTATGTCTCCTAACATAAGGTTTCATCT

>TCONS\_00040252

CAAAATTTAAACCACAAGTTTCTTTATTAATCACTTTTTAAGATGTGCATAGTCCAAAATTTTCCATGCGACAA  
CCAAGTTGATTGAAGATTGCAAGTCAGCAGCACAGGCAGGAATAAATGGTAATGCCTTGTTCAACAAGGAA  
AAAACAAGATAAAACCGTAACGGATCAACAACCTTATATCCTTGTTACTTGAGTTTCTCAAATAGCTTCGGGGC  
AACGCATTTGTCAATGCATTGCCAATAATCAAAATACTGTCCAGTGCAATGCTTGTGCCCTGATTCATCACCTT  
CTACCCTTCTAGTACATGCCTGGTACTCCTTTAGCTGCCTTACACACTTAGGCTTGCAAGTTACTTCCAGTGTC  
GCCTTTGGGTCAACAACCTTCCTCGTCCGACATGGCAAATAGATATTGGAGACGAAGGCTTCGATACAGCAAA  
TTTACCTGAGTCTCGTAGAATCAATGAGCTGCGGATGG

>TCONS\_00040302

GTCAACTTGACTTCTTACCATGAATGATTAAATGAAGGAGGTCAATCTAAATTGGAATTCGAAGTTAATACAT  
GACAGAAAATCACCTCAAATATATCACAAGATAGAGCAAAAAGATTTGTACCAACATTCATCTATGTTTAGA  
TCTCATTTTCATAAAATCTGGTAAATTCGGTTGAAACACAAAAATCTCCTACTTCATCCGCTGTATACAATCGC  
GCTCTTTACAGTAATAGGAGGAAGATTTGTGGGTGGAGGAACCTTCCTCTGTCTATACAAGTTTTGAGTCTGCT  
ACTTTTCCTGTTAGCTACCTTCTATGTTCTATACATGTATCTACTCAAAGAATGCACAAACAATTTATATGGCG  
GACAAGACAGTGCGCAACATGCTTTGATGTGGTAAAGGTAATGTTGCATATATGTTGGACAGGACAGAAGGC  
TGATGTTCCCTTTGGAACCTTCTTCAATAGATTGATCATTGCGCTGATAGTTTCTTCTGTTGCTAAATTGTTCCCT  
GCCATAAAACCTCAGCAAAAATTGCTATTATTTTCGGTATATAAGATCCTTGAGGGCCAATAATTTTCTTCTC  
CGACGTTTCCATCATCGAACAAGCAGTTCGTGATTGATTTTAGCCTCATCCAGATTACACCTTATTGGTAAGT  
GGCTAAGCCAAAGCAAGATAAACTTATAGGTGTAAATGCCTTCCCAGACAACTGGCTTAACTCCCCTGG  
TAGAAATGGCAGCCTCGTAAGCCATGATGTTATCCGGGCGTTTTGCATCGGGATGCTCCATTACAGATTTTAA  
ATGATTGAATATTACTGAAACAACATTAGAAAGCTAAGTCAGTCCTGCTAGTGGAGAAAATAAATATCTTAA  
GCATGTTATAATGCGCAAATTACCTATAGTATGAGGCTTGAGGATATCACCTCCGAATTCAGCACAAATACC  
AACTGCAGTTGCTACTAACTGAAAAA

>TCONS\_00040344



ACAAATTCTAGTCTGATTATTTTCTGTAGAATTGCATCTGTTGCATTGTCAATGGATGCAGTTGCTTCATCTAGT  
ACTAGAATTCCGGCTCCTCTTCAACAGTACACGTCCAAGACAGAATAATTGTCGCTGTCCCATGCTCCAGTTTG  
ATCCATCTTGTA AAACTGTGGAATCTAGTCCCGTTTCTTTTCCTTGAAACAGCCTCTCTAAGCTGACATTTTCAA  
GAACCTTCCATATTTGGTCATCACTATATTCTGACAAGGGATCTAAATTGTATCTAATAGAACCTGTAAAGAG  
CGTAGGATCTTGTTGGAATAATTCCAATACGCGACCTAAGATCATGAAGCCTAATTGTTGAAATATCGCGGTCA  
TCAATGATGATCTTGCCATGTGTAGGTTCAACGAGGCGAAACAATGCACTGATAAGAGTTGTTTTCCCACTGC  
CTGTTCTGCCTACAACCTCCAATCTTTT

>TCONS\_00040447

CCCTCTTCTTCCGCCGCCGTAATCTCATTTCATACGACGACGTTTAGGGTATAATCATGAACGCTCCATCACCTC  
ACCACGAAGAAGACGAACACGAAGATGAGGTCTTCATAGATGAAAATGATATCATACAAGAAATAAACGTT  
GATGAAGAAGAGTTAATTGATGCTGATGAAGATGATGAAGGAGAAGAAGAAGAAGGTGGAGGATTGTTAGG  
TGAGTTATGTTTGGCTCAGTGGAAGTCTTTTGTTTTAAAGTTTTCAGCTTCTATTTGACTTAATCACTTCTAGAA  
ACCTTCTGAGTATATACAGCCAAAATTTTCATATATCTTGTTACTCATGTTTCTGCTGTAATTACTTTTACTTGC  
TCCCTCCATCCCAATTTACGCGAATGTATTAGACTGCACTCCAGGTTTAAGAAATAAAGAAAGACTATTG

>TCONS\_00040565

TTAAGCCCATTATGTAGCATAAGTCTTTGTCTCTATCTTGAACTTCGTCCCAGTCAAATACCGGTCAAATACTG  
ATACATAAATTGAAATGAGAGTACCTCTTCCTGGAGTTGCAGGGACGGTCAGAACTCTTTGTGCTAGCATCAG  
CCAGAAGATGCAGAGATTCCAGCTTGCCAGTTGATGAAGATGGTGCTGGATTACTAATCTGTTTACCTTTGTT  
CATCCCTGATAAAGCTGTGCCATTTAAGAGGGACAGAGCTTTATCATAGGAAGAAAGTATTTCCACAGATAA  
ATACTGGCATACTCCTGTTTCATGGGATCAAATTGCTTTTGCAACTGACACATCAATTCCTCCCTTAGTTA  
GCTCAGTTATCACTACCTCTCTCTCCC

>TCONS\_00040711

GACATAATCCAACAAGTTTTTTCATTAGAATCATGAATAAAGCTCGACTCTTCCACCTTAAAACCCTAGCTTG  
GTTCTACGCCAGTGCCTGCGCTTAGCATTGTACCTGATAGTGTTATCAGTCCTCATACGAATCCAGTAAGGAA  
TGGGCCTGTTTTGCCTCTGCTTCTTCGCCAGTTTCTTCTTAATCATAAATGTCTTATGTGACGGCATTTCACCG  
GTTGGAGGTTCTCGACGATAAGCTCTGAAGCTGCTTGAAGTTGTGAAGCCCTAA

>TCONS\_00040725

CAAATACCCTACAAAATGACAGTAAAAGTAAAATAGAATGCTTCTGATATCTGCCACTGCTCTTCAATGGTTG  
GTTTTAATTGCAATCTCTATCTTCAAGCCCGAGAGACGACTTCAATCCAGCTTCACTGAAGAGAACAAATAAT  
GTACAAACCAGAAAAGAGGATAGGAACCCGACCGTGCTGTTGCAAACATAATCGCCAAGACCATGAAGAGG  
GAATATCCGAGGTAAAGGGTGGCGGAAACAGGGCCGCTTAAACTCTTGAGGTCGAATATTAGGTAGTTGATG  
GAGTATAGGAAAATGTATATCGCGACTGAACCAGAAGCAAAGAATGACTTCCACCACCATTTCCAGTCCTCG  
ACACATAGATGCATGTAGGTTAGAACAAGAGACACCTCAGCACAAACAATGACAAGGAGGAGCATGACAA  
TAAGGAGGAATCCGAAGACATAGTACACACGACCCATCCAAAGACTGGACATGATAAAGAAGAGCTCAATG  
AATAGAGTACCGAAAGGAAGGGTTCCTGCACCAAGAACCAAAAGCCAAGACGGATATTTTTGTGGTGGAAT  
TTCACGTGGAATCTGGTTGGTTCGGACTGGATATTCAATGTGAGGTGCCTTTGCCCCGAGGTAGCCACCAATA  
AGTGTTAGGGGAACAGAGATACAGAACCAAAAGTAAAATGAGAACGACGAACAGAGAAAAGGGAATGGCCC  
CTGTACTGTGACTACCCCATAGCAAGAAGTTCAATGTGGTCAAGATAAAGAAAGCAATCCCGGGGAAGAAA  
CATGCAGCTTTCCACGCAACTGAAACCCAGCCCTTGTGATCGCCACAGAAGATTGTCCTCCAGAGACGAACA  
GCAACATAACCAGCTGCAACACCAAGAATCATGTAAAAGAATAGCATACCTGTAATCAATGTTTCTCGAGAT  
GCTGGGGACATGAATCCAAGGGCAGCAAACATGATAGTCACTACAGCCATCCCCAAGATTTGAACACCATCT  
CCAACCATCGCGCATAGAAGGCCAGGATTACCAGGCGCGCGGAAAACATCACCGACAACAAGCTTCCACCC

AGATAACTCCTCATTCATCTGGGCTTGAGCTTCTTTGTGCGAGCTCATCATACCTTGCCAGATCCCTTCGGACTG  
 TTCTCAAAAAGATCACGAGCACAATACCAGCCAAGAAAGTGATCACCATTAGGGAATTGAGTATCGAGAAC  
 CAATGCACCTTTGCACCTTCCATCTTCAAATAAGCATCCCATCTCGATGGCCACTTAATGTCACTCTCCACAA  
 AGTTCACCTCATAAGTAAAAGCCACAGGCTCATTTTCTTTAATAGCCATGGACACAGTTGTGCGGTACACTT  
 GATTGGAGAAGGGAACCTTATTGTACGTTTTAAGGTTCTTTAACGAATCAGGCGAATGCTGGTAACTACAAGGT  
 ACAACCTCAAACCCAACGACCATATATCCAGGTGCATCGGATCCTGAATTTCCAACCTGTTGAGATCACCTCTG  
 ATCCATCCCCAGTACCCATCACACGAGCCACATTGGTCTCCTCGAATTTATGAACAAGAACCGTAAACTTCA  
 AATGATTAAACACATAGTATTGATCTTGGACCTTAATCCCAACTGGATACCCCGTCCATCGCAAGAAGTAAC  
 CTTCTTCTTGGTATAACGAATAGCGGGCAAATTATCAAGAATCAAATTAACCTGATACATTTTCATCAATCCT  
 CTCTTTCAAAAAGCTTAAATTCCTCACCAGACAAAGGTTTTGTTTGACACAAGAAAACCTCAGTCTCATTGGTA  
 TACATCTTAAACCTATAAGGAGAATTCTCAATCCTATCACCCATAAGAAGCTCACCTAGATTTTCAGCACTAT  
 CCTTCACACCTTCTTCAGGCTTACAGAAAGGCAAACCTATAATAACTATAAGGCAATTCAGTGTCAATTGAAGT  
 CAATGAATTGACCTTAACATTCAAGAAATCACCAACCTCATATTTGTGAGGATAACTTCCAGGCAAATAAAA  
 CCCATGACCCAATTCAGAAACCAAGCAGATAAAACAAAACCCAAATCTTGAATTTATCAAAAAGATCCCATTTT  
 TACACCTATTTTCAGTCTCAGATCTCTGATGGAAGAAAATGGGCTAAAATGGAGAGGAGAAGCGTTGTGAGAG  
 TAACATTTGAGCTGAGGAAGATCTAACAAAAGGGTGGTGGC

>TCONS\_00040825

TCGGTACATATGTAGAGACTGTCCCACATCAAATCTTGAACCAATGGATGAGGGTAATAGAGATCCTCCTTTG  
 CACATGAATGGCGTACTTTTCTCCAATTAATTTTCATTGTATGGTTGATCATATAACTCTTCCCTCAGTTGCAAA  
 ATGAGAGGTGTGATTGGACCAACAAATCTCTTCCCATAGAGATAAGACATTGGCATGTAGACCATTTCGACAG  
 TAACACCACATTTTCGCTGGATGTATGGGAAGAAAAGATGGAAGAATCCAAAACCTCGGGGGGCATTGGATTG  
 GTCCCTAACCCTCAAAAACCTCCAAGAATCGAGAGCCATGTTTTGCCCCAGGAAGGAATCGCGGTGACGCTA  
 CCATGATCAAGAATCCATTTCTTGCTCTAGCACAAGCATTGTTTTCGCCACCATCCGGTCTTCCCCGAGGAT  
 CCTCATACAAATATAATTCAATGTTGTACAGAACATTGTACTGTGACCTTCTATGTGCAAAACCCCATCCACCA  
 TCTTCATTCTGGTGACAGTATATATACCGAAGAATTTCCGTACGATGCTCGGCTGGGAAAACAGTATTAAGAT  
 GGCCAGTGATGTACATACACATAACAAGAGGTGGAAGAAAGAACAAAGGACCGGCATTTTCAGCAGGCCA  
 ATGACCATCACTAGCCTGTAATGCTGAAAAGAAATGAACAGCTCTACGCAATGAAGTTGTGGCAACTTCATC  
 TGTAATTTCTTCTCCTTCTTCTACTTTTACTGCTGGAATTTTTGTTTGAAATTCTTCCCTCCAAGAACTGCATT  
 CGCCAAAGAAGATCACCACTAGGCTTGATTTTATAGCGATTGTTCCAAAAATGTTGACGGGCCTCTTCGATCT  
 CGGCCCGTTCTTCTGGGCTTCCAGCATTGGGTCAAAGGCCATATTTGACGTCCAACGTAGTTGTTTGTGCTG  
 TACAAATATGGCCCATCTTGCCCTGTGCAATCTTCAATTTCCACATTCTTAATTTCTTCTTAACCTTCTAGC  
 TTAC

>TCONS\_00040849

CCGTATACGTTGAGGCACCTTCTCCTGCATAGATAAAACCGCCATCTATGGAGCGAATATCGTACACAGAGA  
 CGCAGAGACCCAAATTTGCAATAACCTTATCCACAAAGAGACCCTCAAGCTCTCCCCTGATTGATTCAATTGAG  
 TGGAAGGCTTAGGAGATGAGGCGGCAATCTCAGTGTGTGTTCTATTTCACTCAAATAAAACATGCCTCCT

>TCONS\_00040935

AGGCACTGCACTCATGTAAGTTTTCTCCTGACTGGATGATATCCTCTTTTTTCTACATTCAAGTTGTAATTGCG  
 GAGGATTTCAATTCTCATTTCTGCTTCATCAGGCTCAGGAGAAAATCTGTAAATATGTGCTCATATTCTGGCATT  
 TTCCCGTACCCAGGAAAGTAATTGATATCTATCACGTAATAGCGGTCTTTAGTCCCATGCTCTCTAATTATATC  
 CAAGTTGAAGAGCCTGAGACCCAGTCTACGACGAAGTCCCTAGCAAGCCTCTCAAGTAATGGTCGGGGAGG  
 AAGCTCACCAACACAAGGGTCTAAATCAGCTTCCTCTGCAGAGGCTGCAACACATGAAACTCTAGGGAAAT

GGAAAACCCCAGCACTTTTTGACAGCTCGAGTTTGCTAACATCAGGTAAACTGAAACGCCTGACAACCTTAA  
CAGCTTCCCCAACATAAAAACCTTAAAGAGCACACCTCCATGATTGATAAATTCCTGCAGAACAAAGCGGGG  
GTTCAAGCTTCTGAAGAGAGGGTGTATCATAGGCCAGGGACAACCTCATGTGACTTTGCAACCAAAGGCTTCG  
CCACAAGAGGTAGGGCAAGACCAGCTTTATTCACTGCATCTGAGATGGATGAAGGATCAGTCTCAATTACCA  
ACTGCCTCGGAACACCAACTGTGCCATAGCTGTCTGATAAGTTCAGGTCTGCAACATCTTCAAGCATGTATTG  
GCGATTATATACCTGCTCTATGGCATCTGGAGGGTCAAGGACTGCGACATGTGGATGTGTTTGCCTATAATCC  
TCAAGAATACGGCTCCACTTGCTTCCTGACAACCTTGTGGAGCACAATGTCAAAAAGGACCTTGATCTGAAAGG  
GGTCTGCTCTGATCTATAGCAACAAATAGTATTCCCTTATTCTAGCTAGACCTACAAGCTTGGGCTGCAAAA  
AACTCTTAGTTTTCTTGATGTAAGAGCATAGCCTACCACCACCAATTTTCATCTGTTCTTGTGGAGACCTCACC  
ATTCCCATTTCCATTTCTTTTCTCTTCTACTTCTACCTCCCCCTCATACCCCACTACATTTTCACTCCTCA  
CCATCTTCATCCCCCTAAAAAAAACACCTTCCTTTTACACCAAATTTATGTATTTATGACAAATTTCTCAACA  
CCCCACTTCACAAAATTTAAT

>TCONS\_00041006

TTGTAACTTGTATCCCTTTTTATTTAATGTTTTGCTTCTTTTTGGAACCTTTGCAGATCTTAAGTTGGGAAATA  
TATATCACTTGTAAATCAGACTTTAGCAATTACGGAAAAGCCATCGCTTCGTTTTTTCAGTTACTTGAGCTTGG  
AGAAATTGCATGAAAAAGCTTAACAAAGTGAATGGCTACTGTTATTGAGTTCGCTCTGAAATTGGGACCTAC  
AACAACAACAACAACAACATCCCAGTGAAATTGGGACCTACATATAGGTTTTTCTCTTCCGCCTGTTATT  
CTAGCTTCATTCATCAATCAGTATGGATCAAATTGCTGAGTCAGTTTGGTTAAAGAAAGCATGTTCTCATTGT  
TTATAAG

>TCONS\_00041031

AGGTGATGGTGGCAACGGGTGTGCCAGTATTTTTCTAGTCGTCATGATCGTCGTGGCAGACCTGATGGTGTG  
TTCTCTAATCACTTCATACCTCAAGGTGGTGGGAAGGAAATATGTAAGTACTGACTGCCATCTTCCGTCTTT  
TCCCCTAGTTGAAGTCTCAAGATGAGGAAGACTCGCCCTCTTCGAGAAAAAGAAGAATGGATGAGGATCGA  
GATGGGGATATCGGCACCTCCTCAGGGATGATTTTGGAGGGATAAGCAATGGAGTGA

>TCONS\_00041047

TATTTACTTAATAAACCAAGTCAACTATTTTTGTGCTTGATAATTATCTCAAGATTGAGCTTGTTCCATAATATT  
ACCAAATTATGTTTTAGCAGACGATGAAGGGAAAAACGATGAAGAAAATGACGAATACGAAGGCTTGAAAT  
TTAACAAGACGCTGGGGAAAAGAGCCGAACTAAGAATTACAAGCCAAAAGTATTGCTTGAAGATAATCTT  
GTAAAGACCTTTAGCCCTGATACACCGAAA

>TCONS\_00041063

TGAAGACCTTTTTCTTTACCCTTCAATTTCTGCTTTGCTTGTGGACGATGAAGGTCAAGGGGAAGAGGTC  
CAGGTTTTTCGTGTTTTTCGGTTAAATCTTCTCAGACATACATATCCTCTCCAAAAGCAATTTTGTACTTGTTCTG  
TTGACATCCCTCTAAATATTGCTCTAATGGAGGTGCCACAATATAGGGTCCTTCTCCGCAAATTCCATATCCAT  
GCCCTCGGAACATCAATTGGCTGTTTAGTGGATTCTTCATCTGCAAAAACCTCATTTACTTGGAAGTATGTCCC  
GTTGAGCGGAAATCTTCTCTGTTTGTGCTGTTGACATGGAATCAGAAGTGTCCCACGAAC

>TCONS\_00041203

CAAACACACAACGATAAGGTAGAGGGGCTCATAAACAAATAAGTCCCCTTTTGAATTGAAGATAGTCCCAAA  
GAAACCTGTTTCACATGTAAAAGAAAAGCAAACAATTTTAAACAACAGCCAAAATTCAGTGATTGATATTCA  
GCATGATAGCAGGAACTCATTACTAGGTAACCTCAAACTTTGACAAAATTGCATCTCTTATCCATCATCAG  
GACTAAGGAGACGAGATAAAGCTTAATCAGAATCCTCAAAATATTCTCCTTCATCAGATGGCTCATCAAACG  
AACGCATGTCAACCTGGTAGCGAAGGATCCCCCAATGCCACCAAATCCTCGACAGAACTGTGACCCCTCTT  
GAGACCTGTTAGTGACAACTCAAGTGAACAACCGAAGTTTTTGTACTCGTTGGCAAACCACTCCAATAGCG

GCATTTTGTCTGGACCTCTAATTCAGCTGAGGTGTCAGGATCCTTGAAGTTGCTGTGATCAGCCTCTTGGTCC  
TTGTTTAGGTGCTTAATGACAATCTCGTTGGTAACACTATTTTTCAGCGCATAACGGTTTATATCAAGATTTTCC  
CAAACAACAAGAGTTTCAACAGCTCCCATCTCAAGAGCTTTTATTGTGTCATCCACACCAAATACATACTTTC  
CAGTATCTTGACTGATTTCTCTCAAAGAATTTCTCTATCAAGCGCTTTTCTTGTATAAACTTCACATTCGCGAGA  
ATCTCAGCAGATAGCTCAATAGCCTGATTGAATCCATTTTCCCCACCATAGGACACATCAACCACATTAAGTA  
TCTTTGTTTGTAGGCGTTGATCAAACATGTCAGACTGGCTCAGCTCTGTCTTGAAATCAGCTGACCCAGCAAG  
TATTAGTCCAGATACATTTGGCTGGCTAGTGGCTGGATTAATGAAGAACTGAGTAGCAAGCTCTGCTGTCTTC  
CTCACATAGTTATGCCGTTTCTCCATTCGAAGACGAGCAAATCGCAGAGCTGATTGACCTCCTCTTCCGTGCTT  
CTTGGGAAGGTCAACAGTGAATTTATGAAGGACTTCCCTAGTGTGCCACTTAAGGTTCCGAAAAGAGTGCC  
ATTACCGTCCATGACAATGAAACCAAACCTTCTCATCTGATTCCAACAGCTCGCCCAGAGGCTCCGTATGAAA  
CTTGTTGTACATAGGTACAGAGACGCATTTATTGGTTTAAAAGGTGTAAGGTCAAAGGTTACCTTCTTTTCT  
TCCCATCGTCAGTCATTATAGTTCCAGTATAAAGGACCAACCCATTAGGAGGTACCTTATTATACAGCTTAAG  
CCTCTGCTGGGCGGACGTTATTGCACCAAGGACGGACTGACGATTTACTCTGCTCTTAATATTGGATGCAGTA  
CCATATTCTTCTGCCAACATCCTTGTTATCCGGGATATCTGATCACCAGGAGGTATAATAAGAGAGATCATAC  
TGGTACCATTTCTCTTGCAGATTCCATGGCTTTGATTAACCTTTTTCATTTTCCATATCTCAATATTCTTGTCAAT  
TTCTTGGCCATCTGCCATTGCAAACCTGCTACTACCACAAGCTGAGCTACAAATTAATCTGTTGGAAGCAGCAG  
TCGCAGTAGCTCGAGCAAAATGCTGGCTGTGGGAAAATTGTGGAAACCCTTTTGAGCTACTATTTATACGCTG  
GAATA

>TCONS\_00041204

CAAACACACAACGATAAGGTAGAGGGGCTCATAAAACAATAAGTCCCCTTTTGAATTGAAGATAGTCCCAAA  
GAAACCTGTTTACATGTAAAAGAAAAGCAAACAATTTTAAACAACAGCCAAAATTCAGTGATTGATATTCA  
GCATGATAGCAGGAAACTCATTACTAGGTAACCTCAAACTTTTCGACAAATTGCATCTCTTATCCATCATCAG  
GACTAAGGAGACGAGATAAAGCTTAATCAGAATCCTCAAAATATTCTCCTTCATCAGATGGCTCATCAAACG  
AACGCATGTCAACCTGGTAGCGAAGGATCCCCCAATGCCACCAAATCCTCGACAGAACTGTGACCCCTCTT  
GAGACCTGTTAGTGACAACTCAAGTGAACAACCGAAGTTTTTGTACTCGTTGGCAAACCACTCCAATAGCG  
GCATTTTGTCTGGACCTCTAATTCAGCTGAGGTGTCAGGATCCTTGAAGTTGCTGTGATCAGCCTCTTGGTCC  
TTGTTTAGGTGCTTAATGACAATCTCGTTGGTAACACTATTTTTCAGCGCATAACGGTTTATATCAAGATTTTCC  
CAAACAACAAGAGTTTCAACAGCTCCCATCTCAAGAGCTTTTATTGTGTCATCCACACCAAATACATACTTTC  
CAGTATCTTGACTGATTTCTCTCAAAGAATTTCTCTATCAAGCGCTTTTCTTGTATAAACTTCACATTCGCGAGA  
ATCTCAGCAGATAGCTCAATAGCCTGATTGAATCCATTTTCCCCACCATAGGACACATCAACCACATTAAGTA  
TCTTTGTTTGTAGGCGTTGATCAAACATGTCAGACTGGCTCAGCTCTGTCTTGAAATCAGCTGACCCAGCAAG  
TATTAGTCCAGATACATTTGGCTGGCTAGTGGCTGGATTAATGAAGAACTGAGTAGCAAGCTCTGCTGTCTTC  
CTCACATAGTTATGCCGTTTCTCCATTCGAAGACGAGCAAATCGCAGAGCTGATTGACCTCCTCTTCCGTGCTT  
CTTGGGAAGGTCAACAGTGAATTTATGAAGGACTTCCCTAGTGTGCCACTTAAGGTTCCGAAAAGAGTGCC  
ATTACCGTCCATGACAATGAAACCAAACCTTCTCATCTGATTCCAACAGCTCGCCCAGAGGCTCCGTATGAAA  
CTTGTTGTACATAGGTACAGAGACGCATTTATTGGTTTAAAAGGTGTAAGGTCAAAGGTTACCTTCTTTTCT  
TCCCATCGTCAGTCATTATAGTTCCAGTATAAAGGACCAACCCATTAGGAGGTACCTTATTATACAGCTTAAG  
CCTCTGCTGGGCGGACGTTATTGCACCAAGGACGGACTGACGATTTACTCTGCTCTTAATATTGGATGCAGTA  
CCATATTCTTCTGCCAACATCCTTGTTATCCGGGATATCTGATCACCAGGAGGTATAATAAGAGAGATCATAC  
TGGTACCATTTCTCTTGCAGATTCCATGGCTTTGATTAACCTTTTTCATTTTCCATATCTCAATATTCTTGTCAAT  
TTCTTGGCCATCTGCCATTGCAAACCTGCTACTACCACAAGCTGAGCTACAAATTAATGTTACCTGTTGGAAGC

AGCAGTCGCAGTAGCTCGAGCAAAATGCTGGCTGTGGGAAAATTGTGGAAACCCTTTTGAGCTACTATTTATA  
CGCTGGAATA

>TCONS\_00041205

TTCGAATTGAAGATAGTCCCAAAGAAACCTGTTTCACATGTAAAAGAAAAGCAAACAATTTTAAACAACAGC  
CAAAATTCAGTGATTGATATTCAGCATGATAGCAGGAACTCATTACTAGGTAACCTCAAAACTTTTCGACAA  
ATTGCATCTCTTATCCATCATCAGGACTAAGGAGACGAGATAAAGCTTAATCAGAATCCTCAAAATATTCTCC  
TTCATCAGATGGCTCATCAAACGAACGCATGTCAACCTGGTAGCGAAGGATCCCCCAATGCCACCAAATCC  
TCGACAGAACTGTGACCCCTCTTGAGACCTGTTAGTGACAACTCAAGTGAACAACCGAAGTTTTTGTACTCG  
TTGGCAAACCACTCCAATAGCGGCATTTTGTCTGGACCTCTAATTCAGCTGAGGTGTCAGGATCCTTGAAGT  
TGCTGTGATCAGCCTCTTGGTCCTTGTTAGGTGCTTAATGACAATCTCGTTGGTAACACTATTTTTCAGCGCAT  
AACGGTTTATATCAAGATTTTCCCAAACAACAAGAGTTTCAACAGCTCCCATCTCAAGAGCTTTTATTGTGTC  
ATCCACACCAAATACATACTTTCCAGTATCTTGACTGATTTCCCTCAAAGAATTTTCTATCAAGCGCTTTTCTT  
GTATAAACTTCACATTTCGCGAGAATCTCAGCAGATAGCTCAATAGCCTGATTGAATCCATTTTCCCCACCATA  
GGACACATCAACCACATTAAGTATCTTTGTTTGTAGGCGTTGATCAAACATGTCAGACTGGCTCAGCTCTGTC  
TTGAAATCAGCTGACCCAGCAAGTATTAGTCCAGATACATTTGGCTGGCTAGTGGCTGGATTAATGAAGAACT  
GAGTAGCAAGCTCTGCTGTCTTCCCTCACATAGTTATGCCGTTTCTCCATTCTGAAGACGAGCAAATCGCAGAGC  
TGATTGACCTCCTCTTCCGTGCTTCTTGGGAAGGTCAACAGTGAATTTATGAAGGACTTCCCTAGTGTTGCCAC  
TTAAGGTTCCGAAAAGAGTGCCATTACCGTCCATGACAATGAAACCAAACCTTCTCATCTGATTCCAACAGCTC  
GCCCAGAGGCTCCGTATGAAACTTGTGTACATAGGTACAGAGACGCATTTATTGGTTTAAAAGGTGTAAG  
GTCAAAGGTTACCTTCTTTTCCCTCCCATCGTCAGTCATTATAGTTCCAGTATAAAGGACCAACCCATTAGGAG  
GTACCTTATTATACAGCTTAAGCCTCTGCTGGGCGGACGTTATTGCACCAAGGACGGACTGACGATTTACTCT  
GCTCTTAATATTGGATGCAGTACCATATTCTTCTGCCAACATCCTTGTTATCCGGGATATCTGATCACCAGGAG  
GTATAATAAGAGAGATCATACTGGTACCATTTCCCTCTTGACAGATTCATGGCTTTGATTAACCTTTTTCATTTCC  
ATATCTCAATATTCTTGTCATTTTCTTGGCCATCTGCCATTGCAAACCTGCTACTACCACAAGCTGAGCTACAAA  
TTAATCTGACGTTACCTGTTGGAAGCAGCAGTCGCAGTAGCTCGAGCAAAATGCTGGCTGTGGGAAAATTGT  
GGAAACCCTTTTGAGCTACTATTTATACGCTGGAATA

>TCONS\_00041206

AAGAAACCTGTTTCACATGTAAAAGAAAAGCAAACAATTTTAAACAACAGCCAAAATTCAGTGATTGATATT  
CAGCATGATAGCAGGAACTCATTACTAGGTAACCTCAAAACTTTTCGACAAATTGCATCTCTTATCCATCATC  
AGGACTAAGGAGACGAGATAAAGCTTAATCAGAATCCTCAAAATATTCTCCTTCATCAGATGGCTCATCAA  
CGAACGCATGTCAACCTGGTAGCGAAGGATCCCCCAATGCCACCAAATCCTCGACAGAACTGTGACCCCTC  
TTGAGACCTGTTAGTGACAACTCAAGTGAACAACCGAAGTTTTTGTACTCGTTGGCAAACCACTCCAATAGC  
GGCATTTTGTCTGGACCTCTAATTCAGCTGAGGTGTCAGGATCCTTGAAGTTGCTGTGATCAGCCTCTTGGTC  
CTTGTTTAGGTGCTTAATGACAATCTCGTTGGTAACACTATTTTTCAGCGCATAACGGTTTATATCAAGATTTTC  
CCAAACAACAAGAGTTTCAACAGCTCCCATCTCAAGAGCTTTTATTGTGTCATCCACACCAAATACATACTTT  
CCAGTATCTTGACTGATTTCCCTCAAAGAATTTTCTATCAAGCGCTTTTCTTGTATAAACTTCACATTCGCGAG  
AATCTCAGCAGATAGCTCAATAGCCTGATTGAATCCATTTTCCCCACCATAGGACACATCAACCACATTAAGT  
ATCTTTGTTTGTAGGCGTTGATCAAACATGTCAGACTGGCTCAGCTCTGTCTTGAAATCAGCTGACCCAGCAA  
GTATTAGTCCAGATACATTTGGCTGGCTAGTGGCTGGATTAATGAAGAACTGAGTAGCAAGCTCTGCTGTCTT  
CCTCACATAGTTATGCCGTTTCTCCATTCTGAAGACGAGCAAATCGCAGAGCTGATTGACCTCCTCTTCCGTGCT  
TCTTGGGAAGGTCAACAGTGAATTTATGAAGGACTTCCCTAGTGTTGCCACTTAAGGTTCCGAAAAGAGTGCC  
ATTACCGTCCATGACAATGAAACCAAACCTTCTCATCTGATTCCAACAGCTCGCCCAGAGGCTCCGTATGAAA

CTTGTTGTCACATAGGTACAGAGACGCATTTATTGGTTTAAAAGGTGTAAGGTCAAAGGTTACCTTCTTTTCCT  
TCCCATCGTCAGTCATTATAGTTCCAGTATAAAGGACCAACCCATTAGGAGGTACCTTATTATACAGCTTAAG  
CCTCTGCTGGGCGGACGTTATTGCACCAAGGACGGACTGACGATTTACTCTGCTCTTAATATTGGATGCAGTA  
CCATATTCTTCTGCCAACATCCTTGTTATCCGGGATATCTGATCACCAGGAGGTATAATAAGAGAGATCATA  
TGGTACCATTTCTCTTGCAGATTCCATGGCTTTGATTAACTTTTTTCATTTTCCATATCTCAATATTCTTGTCA  
TTCTTGGCCATCTGCCATTGCAAAGTGTACTACCACAAGCTGAGCTACAAATTAATCTGACCTGTTGGAAGC  
AGCAGTCGCAGTAGCTCGAGCAAAATGCTGGCTGTGGGAAAATTGTGGAAACCCTTTTGAGCTACTATTTATA  
CGCTGGAATA

>TCONS\_00041215

AAACAAAATGAGCTTGGCTTCAAATAATCCTTGAACAAAATAGGGAGAGCTAACACATGTAATCTACCAAA  
AGTTTCAATTTGTTTCATGATGTCTTAAAATCTGTTCTTAGTATTTCTGCCGCCAAAACCACCAGCACCACGAC  
CGTAGGTTGGGAGGGCTGCCACTGCCTGTGGTTCTGCAGCCTGCTTGACAACACCAGGAAGGTCAGACATGC  
CAAGAGCTGAAAGCATGTCAAGGGTCTCCTTGTGACCTCAATCAAATCAGTCTTAATGGCAGACTCATCGG  
GAACAAAGTCCATACGCCTCTCACGCTCCTCCTTGTGCAATTTTCAAGGAGATGCCTCTAACAGGTCCCTTCTG  
AATGCGCTTCATAAGGTGGGTGGAGAACCCAGCAATCTTGTGCGGAGACGCTTTGAAGGAATTATGGCAAC  
TTCCTCCAAGATCTTCTTGTGTTGGTGTGGAAATCCAAGGTCATTTTGAGTAGTACTTCTCAATTACCTGTCTAGA  
TGACTTCTTCACAGTCTTGGTGCGAACACGACCCATCCTTGC

>TCONS\_00041256

TGATTATATTGAACCTCTTTTTGATTGTCTTAAGACGATTAATAACCTTTTGGTTATTTAATGACAAGCTGAAAT  
GAGTATTAACAGCAACACAAGCAGCATTATATGCATTTTCATTGAAGCATTTGTCAACTTTATTTCCATTTCTT  
GCTTGGATAGCAAGTGCTTCAATCAGACACTTGTCCATTGCCGGAGACCATAACAATTTTTTCCCCTGTGCTT  
CGTCTTCTTTCTCCCACTATCTACGTCATATTGGTCAATTCCAGTAGAATGATAGAGGGGAGTGTTGTCAGGGG  
CATAATGAATAGTAGGTGATCTCCTGCGAGTCAGTGGTGGTCTGGATCTCATTGTTTGCCGGAGCTAGGCGGT  
GGCGGAGCAGCTGCTGACGGTGGCAGTCGGTAGTTGAATTCACAACTTCATTTGTAGCAATTGGCTGGAGTA  
AGGTGTCGTCAGGGGCTATGGTTTACTG

>TCONS\_00041262

AAGAGAAAATAGAATGGCTAACCTGCTTAGTGGCATTACGAACATGTAAAGCCTTAGCTTCCATAGCCATTA  
CCACCAATGCCTTGACCACAACCCCAAATGTATGCTGCTAACTTAACTACAATGTATTTACTCGTCCCATGCT  
GGTAATTACAAGCATACTATAGGAATTTATATATCCATTTTCCACTAAAATCTTTGCTAGTTAAAATGGGTATC  
TGCCACTAAACATGTAAACCAGGGCGTCAATGCTAGATAAATGAAGCAAGATTAGCACATTTTCGCTGCAAC  
CATGTCAGTCGTATGCTGCTGCTGTTAAGAGAAATGAACATCTCCCTTAGACTGGGATTGTCGAATAGATCCA  
AAGCTGCATAATAAAGATGGTCTGTAACGCCTTCTATCTCATCCAACGCTTTGACACATTTATGAATTGAAAA  
TCTTCCATCAACTTGAGGCATAACAACGTCTGCAACTTTGAAGCAGCAATCATCTCCTGTATCGCTTCTGCCA  
TAGAATCAATTATCTCTTTATCCCCACAGCTCTGGTCAGAAGCAGGAGCTATATCTGATGAACACTTCTCTTT  
TTACAAGCTACATTCCTTGTGAGTTTGTGTTGTGAAGTAGCAGCGCTATGTAAAGGTGTTGGCGATGAAGGAT  
TTACAGGAGCCAAGTTGCTAGTTTCTTTAAATGAGCTATCTAGCCCAGCAGATTTGTCCATCCCTTCATAGTGA  
CTTGATTGGGCGTACTTCCCAACCGCACCCGAGTCAGCAAATATTGTGCACAGCTGCTCATAGATAGGGCACT  
CCTTGGGTTTGTGTTGATTCAAGGCTTCGGCTGAGCCCCAATGTCTTCCCAAAGGTCAAACCAATGTAGCAAGA  
ATCGTCCAAAGCATCATTTTGATCAGAAGCAGATTTAAGGTTACAGTAACGAGTACGCAACACATCAAGGTG  
CTTTCTTAGCTGGTTATTATTGAAATTAAGATTGGTCTGTCTATTGAATTGATCACGTATGTAATTCCATGTTTT  
CTTATCAAATACATTGTTTCGGCCGGTTCCCCAGCTTAATCTGCTCAACAACAAGGTCAGCAAAGACCTTGTCC

AGGGGGGGTGTCCACCTTGTTCTCAAGCGTTCTTGCTTGTGTTGCATTTTCATTAGCTTCAGAATCCATCGTTGA  
TAATGGAGTTACCGGCTACGGGGAAGACAGTTCTCTTC

>TCONS\_00041263

CCTTACAAGAGAAAATAGAATGGCTAACCTGCTTAGTGGCATTACGAACATGTAAAGCCTTAGCTTCCATAG  
CCATTACCACCAATGCCTTGACCACAACCCCAAATGTATGCTGCTAACTTAACTACAATGTATTTACTCGTCC  
CATGCTGGTAATTACAAGCATACTATAGGAATTTATATATCCATTTTCCACTAAAATCTTTGCTAGTTAAAATG  
GGTATCTGCCACTAAACATGTAAACCAGGGCGTCAATGCTAGATAAATGAAGCAAGATTAGCACATTTTCGC  
TGCAACCATGTCAGTCGTATGCTGCTGCTGTTAAGAGAAAATGAACATCTCCCTTAGACTGGGATTGTGGAATA  
GATCCAAAGCTGCATAATAAAGATGGTCTGTAACGCCTTCTATCTCATCCAACGCTTTGACACATTTATGAAT  
TGAAAATCTTCCATCAACTTGAGGCATAACAACGTCTGCAACTTTGAAGCAGCAATCATCTCCTGTATCGCT  
TCTGCCATAGAATCAATTATCTCTTTATCCCCACAGCTCTGGTCAGAAGCAGGAGCTATATCTGATGAACACT  
TCCCTCTTTTACAAGCTACATTCCTTGTTGCAGTTTGTGTGAAGTAGCAGCGCTATGTAAAGGTGTTGGCGAT  
GAAGGATTTACAGGAGCCAAGTTGCTAGTTTCTTAAATGAGCTATCTAGCCAGCAGATTTGTCCATCCCTT  
CATAGTGACTTGATTGGGCGTACTTCCCAACCGCACCCGAGTCAGCAAATATTGTGCACAGCTGCTCATAGAT  
AGGGCACTCCTTGGGTTTGCTTGATTCAGGCTTCGGCTGAGCCCCAATGTCTTCCCAAAGGTCAAAACCAATG  
TAGCAAGAATCGTCCAAAGCATCATTTTGATCAGAAGCAGATTTAAGGTTACAGTAACGAGTACGCAACACA  
TCAAGGTGCTTTCTTAGCTGGTTATTATTGAAATTAAGATTGGTCTGTCTATTGAATTGATCACGTATGTAATTC  
CATGTTTTCTTATCAAATACATTGTTCCGCCGGTTCCCCAGCTTAATCTGCTCAACAACAAGGTCAGCAAAGA  
CCTTGTCAGGGGGGGTGTCCACCTTGTTCTCAAGCGTTCTTGCTTGTGTTGCATTTTCATTAGCTTCAGAATCCA  
TCGGCGGTGGAAGTGTGTGTAATCGAAAGGCAAAAGCCCAGAAACCTACCGTTGATAATGGAGTTACCGGC  
TACGGGGAAGACAGTTCTCTTC

>TCONS\_00041426

TACATGGACAGAAGCAGCTGGATAACATGACCGGCTGATCTTTATTTGTCTGAAGGCGTTTACACAATTCAGA  
CTCGTATTGCAGTACACAACCATCCAAAGAATTCATCAGTATAACCTCATCAGCTGTGATGACGCATCTGATC  
TGTTCAAGGTTTACCACAATAGCTTGCTCTCGCCCTAATATCGTGGAAGGATAGATAAACTTAGGGTCCAAAA  
GACGGAGATCCCGCGCTGGTAAAGCACAATGTCTCATAACAGTAGCCTTATCCAATTCCAGAATCTTTGAATT  
CCCATGCTCATCAATCTTTATCCAAGAGCGACTCCCGTGACCTTGGCCTCTCCTCTTAAGACCAGGAAGACCT  
GGCCCGTGAAAATTGTTATTTGCCTGTACATCTGTATTAAATCTAGCAGAAGTAGATTCTTGAAAATCTGTAA  
AAACAAATTGACCATTTTCTTCTGCCATTTGCTTTCACGTTCTGTGAGTTAGTAACAAATCTCAGAAACAAAG  
ATTTACGATTGAACAAAGCCACTAGTACTCTTAAGCCAACGTAGCACTGTTGCTTTTAGCCGAGCGTTAGT  
GTAAGCAACAGCAGTAGCTCTTCTTATTATAGTTCCCGTAACCTTTTTATTTT

>TCONS\_00041484

GATCTTTTGAGCTCCCACTCCTTTTTCTATTACAAACCTTCACTTCAATGCATTGCTGTGTGCTCCTAAGTAACTG  
TTACATATTAATTAGCAGCTAATGGCGTGAGACATGATATTGCAGAAAAAAGAGTTTTAGTGTCCAATTGGCA  
ACTTAGTCCTGCTTTTCTGCCATTAAAAACCGCATAAAAGACTCTTGTAAGACAATTTATGGGCTGCTAT  
ATGTCGTAAGACAAATCTGATTTAGAAAAAATTATGGCTTGTAAGTATGGTTAGAAACAAGAACACGCAT  
CTGTGACTCATGGATTGGAAACACCACTGATCTTGGTGTATGCCAGGTTGCCAGTATGAAATATAAGAGCTAT  
TGGAACCTCATGGTTTGGGAACGCCATTAATCTTGGTGTATCCCAGGTTGCCAGTATTAATCTGGGCTGGAAC  
TTCTATCGCCGGTCCAGT

>TCONS\_00041498

TTTATTTATGCTTTCCTTCTTCTCGGGGAAAAAAACCTCCCCGATCTACCGTTTGCTTCGTAAGTTGCAAAAAC  
GCCTCTTTTCATCATTCACAACCTTTTGAATTTCGGACATTTCTAGAAACCTCTATTTCTCCTTCTCTCTCTCTT

TCTCTCTCTCATCACACGGGAAGCAATTATAGCAATCGATCTGCTTTCGGTGCATCCAGCAACCGATCGGCTC  
TTATTC AAGCTGCCAGAATGGATGGAAAGGAGGTATAAAGGAAGCGAAAAACAACAGTCTTATGGGACGAT  
GCTTAAAAGCAGGGGCGAGCTAGCCTTGAAGATACG

>TCONS\_00041663

TTGCTGCATCCTGATTTGACCATGTGACTCTGAGAGAGTCTGTAGTGAAGTACCGCTAACTTGTAGCTTG  
TGTACATGAGCTTATAGTCTGTGTTCTCTACCAACTTAGAGTATTTTCATTTTTGTGTCTTTCCGCTCTTTCAGGT  
TATGTTCTCTGTTAGCCTGTTAGGTAGATTCTTTAGAATTAACAAGATGTTGATTTGCAGTTTAATCGCACTTTC  
TCAGTAGTTCTGGTCCGTTGGTGCAGGTTTACATGTCGCTCTAATGATGTTCACTGGCTATCTGGTGGGATATT  
ATGCATTCAGGGCATTATTTAGTCACAGTCCAGCAATGAGCGCCGCGGAGGCATTCTTGGATTGGTTGGTGG  
CATGCTTGTTGAGACACTTCTCTTTATTATTAGAACTTCAAGTCAAGATAGAAAACCTACTAGAAAATCCACT  
TCTTTCACCTTCGAAGCAGAAAAAGAATCAGTAGGCTTCATCACAAGAAGTTGTTTCTTTCTAACTTTCTGAGA  
GGAGAGTACTTATTGACCCAAAAAGGATGATACTGAGGG

>TCONS\_00041669

AGATTTACTCCTCTCAGAAAGTTAGAAAGGAACAACCTTCTTGTGATGAAGCCTACTGATTCTTTTTCTGCTTCG  
AAGTGAAAGAAGTGGATTTTCTAGTAGGTTTTCTATCTTGACTTGAAGTTCTAATAATAAAGAGAAGTGTCTC  
AAC AAGCATGCCACCAACCAATCCAAGAATGCCTCCGGCGGCGCTCATTGCTGGACTGTGACTAAATAATGC  
CCTGAATGCATAATATCCCACCAGATAGCCAGTGAACATCATTAGAGCGACATGTAAACCTGCACCAACGGA  
CCAGAACTACTGAGAAAGTG

>TCONS\_00041874

CTTAAGGTTACCAACATAGACAAATTTCCAGCCATTGAGACCGGCTCGGACAGCCAAATCCATGTCTTCTAC  
AGTTGTTCTGTCTTTCCATCCTCCTGCTTCATTAAGAGCTGACATTCTCCAAACTCCAGCAGTGCCATTGAAGC  
CAAAAAATGCATGGATTGCAGATCCAACCTTCTTGCTCCACTGTGAAATGGTAACCAAGTGATATTTCTTGCAT  
TCTTGTCATCAAACACTCATCA

>TCONS\_00041934

ACTCCATCCACTTAACTATACAAGCTGAAGCAGCAGCACAAATCAGTAATCAACTGTTCTGCTGGAGGAGGT  
GGAGGTAATGGCGTGGGGGAAGGGGGGAGGCGCTTTTGG AATATTGAGGAAAAGAAGCGTTGAGCACCGGA  
AGTTATGAGCTTTGATGCGGGGTCCACCACGAGCTTAGTAAGCCAACTAGAGTTTCGAAGTGCCGTCGGTGG  
ACGATCGTACGGAGTATTATTCTGGTTCCGACGTAACGGCCTTTTCCTAAACTTTCTCCGGCTCCTCCTCCTTC  
GTATGCCGCGCGCCGCGCGCG

>TCONS\_00041988

GCAACTTCAAACTCTTTCTTTAAGGGATAAAATCTGTTCTTATTTTGATCAGCTTCCAACCTGAGTTTCTTTT  
TCAGCTGCTTTATCTTCAATTTTGCAGCTTCAAGCTCTGACACAACCTTAGCATAGTCAGCCACTTGAGCCTCT  
AACCTCGTCTTCTCTGCCTTCAAGGACTCGACTTTAAGACCCAAAAGCTTAGCCTCCATATTGTTTATTTAAG  
CCGATTTTGAAGCTCCATGACAGCAGATTCTTGCTCCTTGAGGCCATAATACTCAAGCAGTTGGATCTCAAGA  
GTCCTCTCCCTTTCTTTAAGAGTTTAAACAATATTCTTAAGGTTCTTAATCTCTTGCTCATGGTTATCCGCAACA  
ATTTTATGTTCTCTGGGTGAATCTGCGTCCTGCTGTGGTGTTTCAACATCCTTCTTTGGAGAAAAATTAGCCTTT  
GAAGATAAACTAAATTCCTTCACAATTTCAATTGAACTCGGGCAGAAAGAAACCCATCTCTATCTCCATCAGACT  
TGCAACTTGTAGATGGAACACTTATAGAACTCTCAATAATGCGTTTTGGTATGGAGAAGTCCTCATCTCTCTCT  
GGCACATCAAAAACCTGAATTGCG

>TCONS\_00042015

TGCTAATAGGGCCATATGCATGTAGTTGTTTTGTCTACTATGCTGTATTTTATTATACATTGGAGAGGAAAAGT  
TAATTGAGGGTGGGGTGGGACCTGAAGAGAAAATCTCATAGGAGGCTCCTTAGGTTTTAACTGAAGGATTAT



GTTCTCATGTAATTTGCTTTGGTTGGTTCAGGAGGCGTGCCCCCTGGGACTTCTCCATTAATAGATGAAGGTGC  
AGCTGGACTCCGGCTCTGAATCGTATGCATTGATTACAAAGGTGCTGTATTTAGAGTGCAGATGATACAACCTC  
TTTACTATATTTGAAGTCCATATAAAATAGCACTTCAGTATCCACTTGGTCTCAAAGGCACCCACGCGATCTA  
CAAAGGAATGTTGTTCTTGCCACTGCTGGTGTTATTCTTCGCTGTGTTTATGATTTTTTCATCTCAAGCTTGAGA  
TGCATCAATTTTGCCAGAGCGCTCATGATTGGTACTAGGTTATACTTATTGATGTTCTCGATGTTCTGTATTGAG  
TTTCTATAAAATCTGTAATAGCCTAGCCTTTGTAAACTAACCATTGTATGTTGGACGTACTGAATTCTCTTATC  
AACAGGGAAAAGGTTACAGCGGAAAGTGTACTTAAGAGTTTTTCTA

>TCONS\_00042033

TCACAAATGCAATGTTTTGATAAAGGAATATGATTGCAACTCCTTTGCAAGATTGGTTCAAAATAGGAAGTCT  
CTGATAAGGTAGTGTAAGTAAGAAGTTTGTGTCCCTTAATTAGAAAATTGATATAAGTGGATCCTCAGTAA  
ATCTGCACCCGGCATCATGTTCAATACCTTTCAAATCCCTATGCTGTTTTGAGGAATGCATGAGAATGGCACTT  
CCTTCTTCCCAGCACGTCCAGTTCGACCAGATCGATGAACAAAGATCTCTGAAGAGTTCGGAAGTTCATAAT  
GTATCACCAGATCAACATTAGGTACATCAAGTCCTCGAGCAGCAACATCAGTGGCCACTAATACATTGAATT  
GACCTTGTCGGAAACCGGACAGAGTTCTCTCCCTCTGGCTTTGCGTGATATCCCCATGCAAAGCTTCACATCT  
CAAAGTTTTTGCATTGCACTCGCCAATCTATCAGCATCACGCTTTGTTTGGGTAAACACAATACACTTGCCTC  
CTTTTGCATGCTCTGATATTAAGGGTCCAAGAACTGCTGGTTTCTGACGCATCTCACAAGCAATTGAATACAA  
GGAAATGCCATCGGCTAATTTCTTGTGAGAATCCCCTACAAGATCAATGTGAATTGGCTTCTTCAAGAACTTG  
TTGGTAATTTTCATTATCCAACCTTGGCATTGTGGCTGAAAACATCATCGTCTGATGTTTCTGCCGAACATTTTCA  
AGAATGGTTTCAACATCCTCCGCGAAGCCCACATTAAGCATCTGATCAGCTTCATCTAGAACAACGAACCTGG  
ATTTCTGATAAATTTAAGGACCTCCTCTTCAGCAGATCAATGACTCGACCAGGTGTTCCAACAACAATGTCTG  
CACCCCTTTGAAGAGTACTCATTTGGCGTTGAATGGGGACACCACCATAAACACACAGTGTATCCAAACCGG  
GAGCAGATTCATAAAATTCTTTCTCCACCTGGCGTGCAAGTTCTCTAGTGGGAGCCAAGAGCAATGCTAAAG  
GGTTTCTTCCCGTCTGTATAGTTTAGAATAACCAAAAAGAATTTCAATTTTAACGAATTTCTTATTCTCAACA  
AATAAGCAGAATCAAATAAAGAATCATC

>TCONS\_00042034

CTGTATTGGACCATATAAAAACCAACCCATTACGAGCGTAACATCCTACAGACTTAGATTTTTTAATCTTCTTTT  
CAACATTTTGTGTTCAAGTGGTTAAAGTATCTACACTTGTGGAAGATGCTTCTGCAGAGTATACAAGTCACCGT  
TAAGCACATCCATTCAAAATTAATCAAGAAAGGAGAATGAAACTTGCCTTGAAATGGAGTTCCTCCCTGAAC  
TCTGATCACCCTATCCTTGCCATCTCCGAAGTCATCAAAACGGCTTGAACGGTACTGCGGTCAGACTGTGA  
ATCTCCAAATCTACTTGAACGCCCCGAACCAAAGTTAAGGAAACCAACCAAAACATTTTGAGCCTCCAGAACC  
ACCAAACCTTCTGAGCGGCCCCGAGCTAGTTCCACCGTAGCCACCCCTGATCTTCCAGAACCAGTTCCTACTG  
TATCCACCTGTTGAGAGAAGATGAAGCGCCTTCTCCACCAAACCTGCTGCCTTTATTCCATAGCCACCAGAAC  
GACTTCCACCAAATCACCAGATCGACTACGCATGGTGCCTCCATAGGAGCCAAAGCGGTCAGTGCCTTTGC  
CCATGTCACTATAACATGTCTGCTGCTCCAGCCTCTACTTTAATACTTGGGAGCTCAGTAAATCTGCACCCGGCA  
TCATGTTCAATACCTTTCAAATCCCTATGCTGTTTTGAGGAATGCATGAGAATGGCACTTCCTTTCTTCCCAGC  
ACGTCCAGTTCGACCAGATCGATGAACAAAGATCTCTGAAGAGTTCGGAAGTTCATAATGTATCACCAGATC  
AACATTAGGTACATCAAGTCCTCGAGCAGCAACATCAGTGGCCACTAATACATTGAATTGACCTTGTCGGAA  
ACCGGACAGAGTTCTCTCCCTCTGGCTTTGCGTGATATCCCCATGCAAAGCTTCACATCTCAAAGTTTTTTGCA  
TTGCACTCGCCAATCTATCAGCATCACGCTTTGTTTGGGTAAACACAATACACTTGCCTCCTTTTGCATGCTCT  
GATATTAAGGGTCCAAGAACTGCTGGTTTCTGACGCATCTCACAAGCAATTGAATACAAGGAAATGCCATCG  
GCTAATTTCTTGTGAGAATCCCCTACAAGATCAATGTGAATTGGCTTCTTCAAGAACTTGTTGGTAATTTTCAT  
TATCCAACCTTGGCATTGTGGCTGAAAACATCATCGTCTGATGTTTCTGCCGAACATTTTCAAGAATGGTTTCAA

CATCCTCCGCGAAGCCCACATTAAGCATCTGATCAGCTTCATCTAGAACAACGAACTGGATTCTGATAAATT  
TAAGGACCTCCTCTTCAGCAGATCAATGACTCGACCAGGTGTTCCAACAACAATGTCTGCACCCCTTTGAAGA  
GTACTCATTTGGCGTTGAATGGGGACACCACCATAAACACACAGTGTATCCAAACCGGGAGCAGATTCATAA  
AATTCTTTCTCCACCTGGCGTGCAAGTTCTCTAGTGGGAGCCAAGAGCAATGCTAAAGGGTTTCTTCCCCGTCT  
GTATAGTTTAGAATAACCAAAAAGAATTTCAATTTTAACGAATTTCTTATTCTCAACAAATAAGCAGAATCAA  
ATAAAGAATCATC

>TCONS\_00042046

ACCTCGTTAGTAGCAGTTGTCGTCTGTTCTCACAAGGAAAGCAGTTAAACCTGTTTGACATACTCTGTATACA  
ATCTTGCAATTCAACACTATCCAAGTATTTATTTATGGATTTTCAGTTGCTCAAAAGTTTTAAATACAGATGAG  
GATAGCAGTAGAAGGGTGTATGCACGGAGACTTGGATAATGTCTATGCCACCCTATTGCAGTTGCAAGAAGT  
TGAGAATATAAAGATTGATCTCCTTTTTATGTTGCGGTGACTTTCAGGTAGATACATTTGTTCCCTCGTTAGATTTT  
GACACATCAGTTGTTATTTGATTTGTCTGCACGAGTTAATAATGGAAATCGGGCTTTGGCTCATTTTCTTTACA  
TATACCAACCAATATTGACTACACTGGGATTTTGTGTTCTGAATCTTCTATGCTTATCGTTTATTGGAAT  
ATGAGGCTTAGCTCATTGTAACAGATTCTATTCAGTTTAATTGTGCTCTTCATTATTTGAATCATTCTTT  
GTTAATACATCTTTTTGGTGTTTTGAATCTTCTATGCTTCATGATGTTGGTAATTGATATGGG

>TCONS\_00042101

CCTCCTGAAACTATCTCTTCTTTTTACCCCCCTTCCCAGATTTTGAAGAACCAGCTGCAGAAGAGGATGCAGG  
CTCCTGCTTCTTAGTCCTATTAGGATGTCTCCGGACCAACTCTGCAACATGGATCATCAGCTGTTTCCGGGAAG  
AAATGGCAGGATTGTAAGGGGTTCCATCTTCTTCTTCAACAAAACCTCTCACTCTTCTCTTTGCATGAAATCT  
CGCGGATATGCCTTATCGAGCTGTTACAATCAATCAAGAATATAATTACAAACAAATTCTTTCTCAATCTTGT  
AAGTTGCTGATTTAAAAGTTTAAAAAACATTAATAAAACAGTATTGTTTCAACAATTGCCAT

>TCONS\_00042218

AGCGTTTGCAGGGGGCCAATGGAAGAGGATACGCTCAAATCTCATTTTGAGAAGATCATCTTGATTGGGAAGA  
AATATCTTTTACGGAGGATTTAGGAAGAAGTTGGCAAGGATGACTGTGTTAGAGACAAAGCTATGGATGTTG  
ATTCTGCTACAGGTGGTATGTCTTAAACCTTGCAATTTTGTGTGTTTATTGTATTCTTTTCTTATGTCTTGTTG  
T

>TCONS\_00042231

AACCAAGACATAAGGAAAAGAATACAATAAACACACAAAAATTGCAAGGTTTAAGACATACCACCTGTAGCA  
GAATCAACATCCATAGCTTTGTCTCTAACACAGTCATCCTTGCCAACTTCTTCTTAAATCCTCCGTAAAAGATA  
TTTCTTCCCAATCAAGATGATCTTCTCAAAATGAGATTTGAGCGTATCCTCTTCCATTGGCCCCTGCAAACGCT

>TCONS\_00042243

GAAAAAGCTGGCAGCTGTGCAGGAAGTGCGAACAAGTTCTCCCTTGCGACTTTCCCTCTCTCTGTTTCCATTCT  
CAATCGGCGCACTTTCCCCAAACCCTATTCTCTTTGATCTTCATTATTCTTCAGCTTTAATAGACCAAATCTAC  
GATGCTGGGCGTTTTAAAGGCGCAAAGCTTCTGCTTCGTGTTTAGGAAAAAATCTGCATGTGATTCGCCCTGCA  
GCTTCTACATCTAGAATTCCCTCTGCCGCATCAGAAAAGGTAATGACTATTTAATTTTC

>TCONS\_00042246

ACGCCTTCTTCAGCAAATCTCGGAGGATCATCTAGCTCCTCTAGATGTGCATTTGCTGAGGGTTTCTCAGTGCC  
GAAGAAACAGAAATCATTTTGGAGACAGGAAATTTTTGCATCAAGACTTTCTTGTAAGATGTCCATTCCGTGC  
CTGGATATTTAATAGTAATATCTCTATATGGTTCTGCTGTGATTTACGCAGCTGTGCTTCTTAAATCCTTTGCTG  
AATCCTCTGTTTTTCCACTATTCCCCCTTAATGGATCAAAAAACTCATCCCCGCCA

>TCONS\_00042247

CCAAAACAAACACAATCTCGTTATAAGATATAGCTAGCAACTGCAGCATAAGAAAAGAATTTTCCATTGATC  
CATTGAATAGAAATAGAAATCTTGATAACTCAACTTTAAAACAAATTTATACCATAACCCAAAAGAAGACCA  
CTAACTAGGGATCCACTAAGATCACCTCCTTCTGCACAATTTATATGTAGCTCAATAGCAGGTGTATGAAGA  
TTAAAAGGCATACTAACCGAAGAAACAGAAATCATTTTGGAGACAGGAAATTTTGCATCAAGACTTTCTT  
GTAAGATGTCCATTCCGTGCCTGGATATTTAATAGTAATATCTCTATATGGTTCTGCTGTGATTTTCAGCAGCTG  
TGCTTCCTAAATCCTTTGCTGAATCCTCTGGTTTTCCACTATTCCCCCTTAATGGATCAAAAACTCATCCCCG  
CCATAATCCGTAACATCAACCTGATCACACGACGGTGATTGAAGGGAGAGAGGATGAGTCTCAGCTGGGATC  
CGGCGGAAGGAGTGAATCTCTACTTCAGCTTTGTAA

>TCONS\_00042260

TACCTTTTCTGATGCGGCAGAGGGAATTCTAGATGTAGAAGCTGCAGGGCGAATCACATGCAGATTTTTTCCT  
AAACACGAAGCAGAAGCTTTGCGCCTTAAAACGCCCAGCATCGTAGATTTGGTCTATTAAAGCTGAAGAATA  
AATGAAGATCAAAGAGAATAGGGTTTGGGGAAAGTGCGCCGATTGAGAATGGAAACAGAGAGAGGGGAAAG  
TCGCAAGGGAGAACTTGTTTCGCACTTCCTGCACAGCTGC

>TCONS\_00042261

GGAAAGATTGAATTGCAACATAGCTCTATTTGCACATCTCAAGTATAGATGGTTGCAGCTGATTAAATAATCA  
GGGGGAAAAACAATGTTCAAGGCCTCCAAAACGTGACATTGTTCATGTTTATTCTGGTTTTAAGCTTGAGTGT  
ACACTCAGGTATACCATGAACAGTCAAATCAAAAGCCAGAGATGATTGTATATCTTCAAACATCAAGGAGCA  
GGCGACGTGGATCTTCAACCACATCTTTAATCCTTCTCAGAAAGTACACTGCCTCTCTTCCATCAATCAGCCTA  
TGGTCATATGTCAGCGCAATGTACATCATTGGTCTTGAGACAACGTTGCCTCCAACAACCATTGGGCGATTTA  
CAATTGAGTGCATTCCCAAAATAGCCGACTGAGGAGGATTTATGATAGGGGTACTTAGAAGACTTCCATACA  
CACCACCATTGGATATTGTGAATGACCCTCCAGCCATTTTCATCAATAGAGATGGTTCCATTAGTTGCCTTCTTA  
GCGAGTCCGTTTATTGTCTTCTCTATCTCAGCAAAATTCATCTTCTCAGCATTGCGGAGAACAGGGACGACCA  
GACCCTTTGGGGTACCAACAGCTATACTGATGTCTACATAGTCCCGATATATGATATCATCGCCATCAATAAC  
TGCATTAACATAGGTTGATTCTGGAGTGCAGTAACTGCTGCTTTCACAAATCCAGACATGAGTCCTAACTTC  
ACTCCATGCTTTTCAACAAATGCATCTTTGTAATCAGATCGGAGCTTCATCAAATTTGTCATATCAACTTCATT  
GAATGTAGTCAACAATGCAAATGTGTTCTGAGAATCTTTCAAGCGGGTAGCAACTCTTTTCTGAGCCTGGTC  
ATGGGAACTCGTCTTTCCCGCTCTTTAGGGGGAAGTTGGGGTTCTGTAGCAGAGCGCTTAGGAGGCGGCAGTG  
AAGTTTCCTTAGACTTCTCCTTGACAGGAGTTGTCTCAACTTTAGTTTTATCTCTTCTCTTTTTTCTCTTCAAC  
GGCAGAAGGTGGCTTCGGAGCTTCTTTTTTCAGATGGCTTCTCAGATGGAGCAACATGATCTACACTTTCTACA  
CCCTCACCAGATTTTGAAATAATAGCAACCTTATAGCCTGGTTCCACAGTGTCTCCTTCTTCTAGCTACAACTT  
TTGGATTACACCGGCTTCAGGGCTAGTAACATCAATTGTACCTTATCTGTTTCAATCTGAGCAATTGGCTCAT  
CAACTTCTACTCTGTCACCCGGATTCTTCAGGAATTTAGCCAGTGTGCCGCTCACTTATGGATTCACCCATAAAA  
GGAACAACAGCATCAACCAGATCACCACTATTTGAACAAAAAGGCCTGCCGCAAATATGTAGCGTGAGACT  
TGAGTGAAGATTGGCCACAGCTCCCCCTTCTGGCCTCAAGT

>TCONS\_00042384

ATTGTCTTCCCTGACAGAAAGCTTCTTTATCTTTGAAAGAAAGAGAAGAACTTCAGGATGGATGCTTGAAAGC  
TGCTGCTTAACAGGTTTCACCTTGTGAGGTTTCAGTGGTAGCACTATAGTTGTGGCTGGAAGGGTAGCAGAAG  
ACCCATAGATTTGTTGTATAACTGAAAGAGTTGGGTTTGCCTCCACCCATTTCAGGTACAATATAGCCTACATT  
GCAGTGCTGGCAAGGTTCCCTCGCTGAATCGTATCTGGTACCCATTGCTGAAGATGTAGGGCTGCGCAGTGATG  
AGAAACACACTCTTGAAGCCAATGCCTTTCTCGCCGATGTAGCCACGTTTGCATTGCCCTTCTTAGTAGAAC  
GTCCGACGCTGCAAATGGACTCGATATTTTTGCGGGAGAATCCTTTCTCGTTATTGAAGATTAAGCGTCGC  
CTGAGCTCCGGTGTCCGTTATATCTTTGGAAGTAATCACAAATTCCAGTGAGGGGTCCACGCCTTCGTGGTAC

TCGTTATCCTCCGCGTTCTGAACAAGTTCCATGAAAAAGTGAACATCCTTAGCGTAAAGTTCAGCAGAGAGAT  
TTTTGACAGCTTGATGAAGGTCCTCAGTGAGTGGATTAGTTTCACCTCCAATGGAGAACTTGCTTCTCCTTATT  
TCTTCAATGTGCTCTTTTGCCGTCGCCATT

>TCONS\_00042412

AGCTTTACGACTACCCCAGCAGCAACAGTTGAAGCGGCCGAAATCGGTGGATAAGTTCCTCATACAGCCAGT  
ACGCAACGTTTTTTTCATTACATAGTCATAATCTGACGAGCAAGACCAGGATCCTGTTGTAAGAGCTCTCTAAG  
GTTATTCTCCACCTCCGCCAGATGCTTTTCCAGATACTCTTTAGAAGTCTGCAAAGATGCAATTGCGGTTTCAC  
TATCCTTGAGTTTTTGCTCTTGCTCATCCATTAAACACAGTCTTTGGCTCTAAGATAAACGTTCTTCCTATGGCTT  
TGTATGTATTAGTATCATCAGAGAGCTGCTTCAGTTCCTCCAATGTCAAAAAAGCGCGCTTCTTTTCTGTTTCTT  
TAGTTCGCATCTGCGTTTGAACCTGCTTCAATTTCCCGGTAGTCTCAATCATGCGACCTTGAATTTCAATAAAA  
GCCGCTCTATTTGCTTCGTCGGCCATTTTTTCAACTTCAATTCCGAGTGCTGATACAGAAGCTGAAGCCCTAGT  
ATAGGATTCTACTTTCTG

>TCONS\_00042572

TAAATCTCTCGGTTTGGATTTTGGAAACAACAATAGGAAACGGAAGAGAATAAAGGAAAATCGAATAGGTA  
GACAATGACTCAGAAACACAAATAGAAGCCGGAGGGCGGATACCTCATTGGCCAAACCGGCCGTCGGCATC  
GAATATCTCTTTGTTTTGCTCAATCGCCAAATCCAACGATTGGAATATGAACAAGATTCTCTTCTGATAACTAT  
GTTGTGCGGACTTTCCAAAATGATGTCTGACCCGTGT

>TCONS\_00042602

TCATTTTGGAAAGTCCGCACAACATAGTTATCAGAAGAGAATCTTAGAAAACTTCAAGTAACTATTGTGAG  
GGAAAGAATTAATCCGCCAGCTTAATTTTCAGCAATATTGGTCTTGTTTTACACGATCACAGTTCTGATGAAAG  
ACATATCTATATTTAATCTACGAGTGCCACAAATTCATTGAGTTTAACTGTTCAAAATCCGAAAATGAACAT  
GTATAAATGCAAGTGAAATTGAACTGACTTTGATCAGAAAGTGATGGACCTTGTTTCATATTCCAATCGTTGGA  
TTTGGCGATTGAGCAAAACAAAGAGATATTCGATGCCGACGGCCGGTTTGGCCAATGAGGTATCCGCCCTCC  
GGCTTCTATTTGTGTTTCTG

>TCONS\_00042680

ATGAACTGCAAATGCTCTTTTCAAAAAATGATCGCCATTTTGTGGTGAAAGGACAAAAAGGGAAGCAGTATC  
ACTGCTACAGTTCAGGGATCTGATTACACAATTACCTCATAATTTTGCAGCAGAAAAATCTGCCAGGATCAAT  
CAGACCTTATTTGAGTACCGCTGACCAATAAAGAGCTACAATGTTGCATTCTGACTAGCTACCTTCTGTAAAT  
ACCTACTCCTAATTTGCACTATGAATCCAATCCTATCCACATAGATGTTCTTAGCCATGCGATGAGGGGATG

>TCONS\_00042833

TTGTATCAAAATGAGGAACGCTATGCTGCCTTAACTCATATGGTGGCTTCTCATGGACTGGATCGTAGTTCAA  
AGGTGCTTCGTCAGACGAATATTGGCACTTTTTTTCATGCTTTAGTTTCGACTGTTTCGTAAGGTAACTAGGTCC  
CAGGAATTAGTCAAAGATGGTAAAAAGTTATCAGCTGTCTGGTTCTGAGTTTTGACTCAGACACAGCATGTCC  
AATGTTCTGCGGTCTGCTACTGTCTAATATACAGATTATCGAGGTTAGTCTATAATTTTGACGTTTTCTATTCC  
GAGAAACGTTTCGCTTCAGACGTAATG

>TCONS\_00042834

AAATGAGGAACGCTATGCTGCCTTAACTCATATGGTGGCTTCTCATGGACTGGATCGTAGTTCAAAGGTGCTT  
CGTCAGACGAATATTGGCACTTTTTTTCATGCTTTAGTTTCGACTGTTTCGTAAGGTCTGGTTAACTAGGTCCCAG  
GAATTAGTCAAAGATGGTAAAAAGTTATCAGCTGTCTGGTTCTGAGTTTGAAGTTCAGACACAGCATGTCCAAT  
GTTCTGCGGTCTGCTACTGTCTAATATACAGATTATCGAGGTTAGTCTATAATTTTGACGTTTTCTATTCCGAG  
AAACGTTTCGCTTCAGACGTAATG

>TCONS\_00042836

ATTTAATTTACCAACCAACCGTCTATATCTTGCAGGATCGCTAAGAGGCTCCCCCTGTCCTGGCAGAAGTTTA  
GAATTCGGATCCATCGGAGTGTCAACAGGTTTACAACCTGTCATTCTGTCTCTCAAGAATATCTAAGGCAT  
ACTTCTGTTGTGAGATCACAATACCTGAGCTAGACTGAGCGACCTCAATAATCAGAAAATACTTTAATCTGCC  
CAGATCCTTAGTCTGAAAGTGCTGAAAGAAATGTTGCTTCAACTTACTAATACCATCCTGATCATTGCCAGTA  
ATAACAATATCGTCAACATAAACGACCAGATAAATACA

>TCONS\_00042878

CCCCTGAAACACAAACAACAAAACCTCTTCTTCGGTCAATGGATCTTCTTCAACCTCCTTGTAGCGCTTGCAC  
TTCCCCTCTTCTCCGTCGACTATCTTCTCTCAATTCCGTCAACTTCTCTTTGAATTCCATCAAATCCGCCGCAAA  
CTACTCCGAAATTTCAAACCTCTGTCGCCGCCGCAAAATGGTAGCAGCTATTCTCCCTCAGTTCACACATAA  
AGTTACCGTTCTCGACCGCCAACGTGGCGTGGTCCACGAATTCCTCGTTCCCAGGACCAATATATATTGCAT  
ACA

>TCONS\_00042951

GCATTTTCATTAAGCCTTGTTCACAACATTCCATATATAACAAAACAAGTCTACATCTTTCCTCTCACTCA  
TTCATAACAGGCTTGTTCCTCACTAGCTTTTGGCCTCTGTTCTTGGCTTCTGCTCTTCTGTTTCCTCTTGTCCG  
AGGCGCCTCCCTTCTGGCTAAGGAAGGATCGGAAAAGCGGCGAGTTAACGTCGTAAATCATCGTCGTCGGTC  
GGAATTAACCCCTAATATACCCAAAACCCTAATCTCCTCTC

>TCONS\_00043018

CATCAACCTCTTCCCCGCATATACTCTTTGTACAAGAAGGGTCTGTATTTTGGTTTTCTGCAATCTCCTTTGTA  
AACTGGGGAAGTGGTTCATCCATTTGTCTCCTGACAACTGTAGAAGAATGCAAATGAATTCCTTGATCTTC  
CATTAGGTCTCAGCACCCCTATGGCTTGGACTTTTGAATTTGTCGTTGAAAGGACCTGTAAATATATGGTAA  
CAACTCTGCCAA

>TCONS\_00043021

CACGATTATATAATCTTACCAGTTGGATGTAACCAGTCCAGAAACGTAACCTCTGGCTCTTTCATATGGATCTTC  
TTGCAAGAGTTTAGGTATGAGATTCCAAGTTTTATCAATATATTCAATGATGACAGGTGATTCCACAACAGCT  
CTACCGTTGTGAATCAACATGGGTACCGTTTTGTGGACTGGGTTGTGTTGGAGAAGCAATGGACTCTTGTGTCT  
CAAGTCCCTCTCGCACAAGCTCGAAAGGAGATGATGTCGAGTTAAGAAGATGTTCTGGAGCTAAATCGAATA  
ATTGGAGCTTTGACGTCTG

>TCONS\_00043031

AGATCCAAGCACAATGACCTCCCAACATTCAGACAATGCTTACACATCTACTTGCTTTGGGCACATTTCTTTC  
ACCATCAACTGAGTTGCTCATAATAAAGATTCAACTAGCAAGATGAAACCATTGTGTGATATATTAGGTATAT  
TAAGACAAGATTGACAACTCAATTTATATAGAATGGGGAATGAAGTCGGATATATTCAACTAAAGCAAAATG  
CTCCTCAAAAGTTGCAGCAATCAGGTCAATTTGTAGTGCACAACTAGTAAACACTTGAATGTCAAAATTTTAC  
CAAAATTTAACTAAAGTCCCTCTAAACTCTCAGCTTAGTTCTTGGCCGCCAGCTTTTCTTTGGCTTTTGGATC  
TTCAAAACCTTCTTCACAATTTTCTGCTCTTCCACCAAGAAAGCTCGAATAATCCTCTCCCTTACTGCACTTCC  
AGACAATACTCCACCATAGGGACGGTTCACAGTCTCCTGTTCTAGATAATCTGGATCTCTTATACTCAGTT  
GGTCTCAAGTGTGGAATCCCCTGAATCCTCTTCCAGTTACAGGACACTTAGGACCACTAGCCCGCTTCTTGG  
TACTCTGGTAAATCAACTTCCCACCAGGGGTTTGTACGACACGGTGCTGGTTGGATTTGGTGGCATAGCTGTG  
GCGCTTCCGGTAGGTGAGTCGCTGCACCATCTTCGGAACCTCTCTCTCTCT

>TCONS\_00043153

AAGTATGACTTCTTTATCATGCTTAGAAATCATCACCTAGGTCCTGAAAGAATTGAAGGAAACAAGGTAGTC  
GTGGTGTCTGCGACTCTTTTGATTGCTGCAATTGTTTGTGAATTTGGAACACTATAGTCCAAGTGCGATTCAAT  
GTCCATTGTTCCCTCTATTACTTTAACCACCATGGACATGGAAGGCCTCAGAGTAAATCACTTTGTAAGCAC

CACACAGCAAGCTTCATCATACGGACGACTTCTGATGTATTGAATTGCAGATCATCCTTGTAGTTTCCAATCA  
TATCGATCAGCTGATCGTTTTTCAGCCTTTTTTCATAAACAAGGTAAGCAAATGTGGATATTCCAGTGAATGTGA  
ATAGTCCACATTCTTACGCCCACAGAGGATCTCCATCACAACAACCTCCAAAGCTGTAGACATCTGCTTTTTCT  
GTAATGAACGCGCTAAACCATTTCAGGAGCCAAGTATCCGGGAGTTCCCCTAATTCTGGTCACTATCCTGCTCT  
GATCTTTATCCACCAACTTGGCCAGGCCAAAATCAGATACCTTTGCACAAAAATTGTCATCCAACAGAATGTT  
CTGTGGCTTAACATCTAAGTGGACTATTCTTTGCCTGCATTCTTCATGAAGATAAGCCAATCCTTTTGCTATAT  
CATGGATAATGCTGCTTCTTATTTGCCAATTAAAGGTAAACTGCGTAGAGCCTGTGCCAAAAATCCATTTATC  
CAATGATCCATTACTCATGAAATCATAAACTAATAGCTTGTGCTCTTTCTCAGCACAAACTCCAAGTCTA  
ACAAGATTAACATGATGGATGCTTCCTATGGTTTGGACCTCTGCCAAGAATTCCCGTTTCCCTTGGCCAAAAC  
CATCAAGAACTTTACGGCGACTTTCTGACCATCTTGAAGAACTCCTTCATAAACTGAGCCAAAGCCTCCCTG  
ACCAAGCTTTTGCTGGAAATTCCCGGTTGCCACCTTCAGCTGTTTCATAAGAAAAT

>TCONS\_00043155

CTATATCATGGATAATGCTCCTTCTTATTTGCCAATTAAAGGTAAACTGCGTAGAGCCTGTGCCAAAAATCCA  
TTTATCCAATGATCCATTACTCATGAAATCATAAACTAATAGCTTGTGCTCTTTCTCAGCACAAACTCCAATA  
GTCTAACAAGATTAACATGATGGATGCTTCCTATGGTTTGGACCTCTGCCAAGAATTCCCGTTTCCCTTGGCCA  
AAACCATCAAGAACTTTACGGCGACTTTCTGACCATCTTGAAGAACTCCTTCATAAACTGAGCCAAAGCCTC  
CCTGACCAAGCTTTTGCTGGAAATTCCCGGTTGCCACCTTCAGCTGTTTCATAAGAAAAT

>TCONS\_00043368

AGGAAGTAGCAAGTCTATTTGGATCACTAATCTGCATCCATCTCTTCAAGGGCAGCTTTAGCTGCAGTCTTCG  
CTTCCTCTAAAATACCATCAGGAACCTTCTGATGTTGGCGGTTGGACTCGTCACATATCCAACCTCATTTCAGT  
TCAAATGCCTTGTCTTTGCCTCATCATGTACTCCATAAATTATTTTGGCCACCTCAATCACCCCTTGTCTGGCA  
GGTCATCTCCGATAACTTCAGTTTTTCAATTTCTGTTTTAGCAGCTTGTCTGCCCTTTCCAATAGCAGCACCAA  
AGTACCTGTATGAGACACCAGAAGGTTCAACCAGGTACAGTTGAGGTCCATCTCTATCATACCCTCCAAGAA  
TCACCCACATCCGAAAGGCTGAGCCACCAATACAGTGTGCATAAATGCACATAACTAGCAACGCGTTCCG  
CAAGTTCTTTCACTGGAATTGGCTCACCATATGTACTTTCGAAGTTGGTTGCTTCAGACTTAGCCCGGGCAACA  
ATTTGCCTCCCATCTGCAGCCAAACCTGCAACAGCCATGCCGGAATGGCGATGAACGGAGTGAATTCTCTGA  
TTTGATCCAGGCAACATCATCTTGGATGCTATTAGCTTCTCCACTCCCAAGACGATTCCGTCCTTGCATTTGAT  
GCCGACAACAGTGCCGCTGTTATCGACAGCTTTGCCGGCGTATTGATCTGAAATACTCTGCCGTCCGGCGAG  
AATGTAGTCACGGATAAGTCATAACCTGTTCTATGCTGGCCATTTCTCCCTTCTTTTCTTCTCTACTAGAGCTT  
CTACTGATTCAAGTTGAGTTCAATTTGGAGCTGTGTAGTGACC

>TCONS\_00043415

GGGTTTTTCAGGTTTATGGTGACCCACGGAGAAGGGAGTGGACGACTTGATCTCACAAGTCACAAGACCTCG  
CTCGACAACCTGGCACAACCTTACTTGGTAATCCTTAAGTTGCAACAATCATGTTTATAGTATGTTTTTCTTTACT  
GTGAAGCTTTTGTTGCTCCGAAGGGCTTGCCGAGTTCCCAGTAGATGTCTGAGGAGCGAGGAGGGAGAACAT  
ACTTGCTGGTTTACGTGGAAAAAG

>TCONS\_00043429

GATTGTCCATGTTGATCAGTAGCTTAGTTTCAGGGATCTAATGTGCAGTGCGCAATATTCCATGCAGATAACCA  
CCAGTCATAACAAGAGACACAAAGGAGACAACACCAGCTGGAAAAACCTTCTTTGACTTCAGAAAACGAGA  
TCCCATTACTCCCAGAAGTGCAGCCGAGAGGACGAAACCCATTGATGATGCCAAAACAGGCTGTGTTGGAA  
GCATAACATAAACAGAGTACAAAAGGGAGGCAGAACTCCACCTGCAATTAGGGACTTGCTGCCACTTTTCA  
GATAACCCATAAAACCACCAGCTCCAACCAAGAAAGCATAGCCCAATGTCAATTTTTGGGACATACAAAGG  
GCCATTTTCTTTTATTGTTATGATCCTTGCTTCATCTGACTCCCCCTCGTTGCCACCATCATTATTATTATTAT

TGCCACCATTATCTCCCCACCACCACCACCGCCATTTGCACTCCCAGAATCATCTCCACCACCACCACCTGT  
CTCTGGCAGAATATCAATTCCCTGGCCCTGCTGAATCAACAGTGAAGGTGGTTGGCATTGTAGAATCAGAGAC  
AACACTGGCTTTGACTCCCCAGTAGGAAGGCTTTGATCGAGTGGACAAGTTTGGGTACACCGTGCAAGGGAT  
ATTCAATAGATGTAGAGATGAACGAAGTGACCTCAATGGCTGACTATGAGCAAAGAGATGCTGCCTTTGACT  
CCAAGCTTGGACGTGAAAGTGAGGCAGCACTATGGAGGATTGAGCAATGGCCAAAAATTCTCCCATGATGTA  
TATGCTGAATTATGAGAAAGTTATTTATGGGATGTTTTGTTTTCTGTAGCTTGTGTATTCTCAGCAACTTCCACA  
AAAATCAGTCTTCCATCAACAATCTTCTGTAACAACGCCAAAAGGTGAAAAGAGCTTCTTCAATCTTTCATTC  
GTAGTGTAACGATAATCTGCTGACGAATAGCTG

>TCONS\_00043470

CATCACATGAGGAGTTGTCAACAAGCAGTTTTAGACCTGGACAGAGCTATTCATTGAAATGAATTACAGAGT  
CTCGACTCCAACGGATGAACCGGGGTTGGCAGGATCAATTCTACTCATATTTTCCTTGTGAGCTTTCTCTCTTT  
CAGCTTTCTCCTTTTCAGCCTTCCGCTTCGCCTTCTCCATCCTCTCCCTTTCCATTTTCTGAATGTAGACGGTCTC  
TTTAGCACGTTCTTCTTCACTGAGGATTCGACCTTTGCCGTCGGTGAAGTAGCGAAGGCCCGAAGCCGATGAT  
CTCCCACCACCTTCCATTAAACGACGGACTCCACTGCTTGAAACGACTGATCTCATCGCCATATTTATCTTCTC  
CTGGAGATTGAACTTTAAGACTGCAAAACAAAGTCGTGACTTGGTGAGAAAGTCAGCAAAACCTACGCCGTG  
TCACCTGCAAACTTG

>TCONS\_00043496

CTTGGCCTTTACAAAATACAACCCGATGCCGATATAGGTAGAATCCAATTCAAAATCTGCAAAAAATTTACA  
AGGGTTTAGTTAAAGGGTTTTGTGGGAGTGATTAGTCAATGGAGAGCAGGAAGTTGGTAGCAAAGCAATTCC  
TCAAGGACAAAAAATTCTGGGTGCCTCTTTCCCTCGTTGTCTGGGCTGCTGCTCTGCAGGGGCACATGATGTG  
GTTGCAGAGGCAAGATTCTTTCAAGCACAAATTTGGAACTTAAACGACCAAGGCACCAATCAACAGGATA  
ATCACTCATCAAATTAACACTTTTGGTATCATAATTGGAATCTTCTCTCGTATTTCAATGCTTGGAAGTGGTTTT  
TCTCTACAACATATCCATTGCACTTCTGGAGTTATCAATGATAGATCCAGATAGAAGTATTCAGGATTTAGCAA  
ATAGCAATCTCTGTTATGAATGATGCAATTAGCATTCCCATTTTATTCTCTTGGGCTAGTCTTGTCAAATGATAT  
TTGGTCTCT

>TCONS\_00043497

CTTGGCCTTTACAAAATACAACCCGATGCCGATATAGGTAGAATCCAATTCAAAATCTGCAAAAAATTTACA  
AGGGTTTAGTTAAAGGGTTTTGTGGGAGTGATTAGTCAATGGAGAGCAGGAAGTTGGTAGCAAAGCAATTCC  
TCAAGGACAAAAAATTCTGGGTGCCTCTTTCCCTCGTTGTCTGGGCTGCTGCTCTGCAGGGGCACATGATGTG  
GTTGCAGAGGCAAGATTCTTTCAAGCACAAATTTGGAACTTAAACGACCAAGGCACCAATCAACAGGATA  
ATCACTCATCAAATTAACACTTTGTAGTCATGTTTCCACCATAGGACTGGCAGGTTATTACCAAGTCATCTGTT  
GGATAGTTTCCAAATTTGCTAGATTGCAGTAGCAGTAGCCAGTAATT

>TCONS\_00043505

GGCTACTGCTACTGCAATCTAGCAAATTTGGAACTATCCAACAGATGACTTGGTAATAACCTGCCAGTCCTA  
TGGTGGAACATGACTACAAGTAGTTAATTTGATGAGTGATTATCCTGTTGATTGGTGCCTTGGTCGTTTAAAGT  
TTCCAAATTTGTGCTTGAAAGAATCTTGCCTCTGCAACCACATCATGTGCCCCTGCAGAGCAGCAGCCCAGAC  
AACGAGGAAAGAGGCGACCCAGAATTTTTTGTCTTGAGGAATTGCTTTGCTACCAACTTCTGCTCTCCATT  
GACTAATCACTCCCACAAAACCTTTAACTAAACCTTGTAATTTTTTGCAGATTTTGAATTGGATTCTACCT  
ATATCGGCATCG

>TCONS\_00043522

AAATAGCATTACCTGTTCTTAAAGGCAAAAGAGGTCTTGAATATCTGCATAGTGGACTCCATCAATTCATCAT  
TGAAAGGTACAACTTTGGCTTCCCTTGAGTAGTACCAGAACTCAATGAGATAGTTTCAATTGGTTTTCCAGT

AAGAATGGGAGAAAGATCACCATCAGCAATTCTTTGAATGTAAGGCTCCAAATCATTGTGAGTGACAATAGG  
GACACAATTCTTGAAAGTCTGAGGATCAGTTCTGCCATTCAAACCCCATAGCTGCAAATATTCTGTCCCTCCA  
TTCTGTTCCAGTATCTTTTAAGTGTCTCTTCTTGAATTTTGCCAGCATCTTTGTCAAATCCTCAAATCCTCAA  
TCACTTTTTCTTGATCAAACCTTCTTCTCAATCTTCTCCACCAACATCTTCATGATTTTCC

>TCONS\_00043562

GGAAACAGCATGTGATAGAGATGCATGAAACCAAGATACATGTGCGTACATCGCCAGAGCCTTTCACACCA  
GTAGTATTGGAAGGGATAGGTACTTCACACAGGGAATTTTCATGTAAAATCCAACAGCGGGTTGAGTTGTCCT  
GGCTGCAGCTGTATAGGCAACGTCCACCAAAAGCCCAAGCTAAACCTGTAACCTACATGATTATGAGCATCAC  
AGGAGCCAGCTTCTCAAATCTACGAACAAGAATGTCACAACCTCCACACTTCAATTGATCCTGATCCGTTGCC  
AATGGCTAAGAGCATTTTATTAGGTGATTGCGCAGATACACTGAAGGAAACCACAGAGGCCATTGCAAAGTC  
GGCGGCTTTTACCTCCTTCAATAGAGAAAAGGGTGAATCACTA

>TCONS\_00043563

GGCAGGCATGTGCAGGGACTACCTCTTATCAACGGTTCGTACTTCTTCTCCAAGAAGTTCAGTTGATCCTTTA  
CATCTTCACCACAAATTGCAACCCACCGCTCCATCTGTGCTGTTCCAACAGGGACCCAATAACTAGATTTACT  
ACCCTTTCCATCAGAACCAGAGGCGTCATCAAGAAAGACAGTAAAGCTATAGCCAACCAGCCTATCTCTCAG  
TTCCATCTCACTATTGAGTGAAGCTGTGTCCAATCCAATCTTTCATCTTCAGCACTGTTGAAGCCCTCTAAAA  
ACTGCGATTGCCCATCAACTTTATCTGTCTCCACCTTTTTCAAGACTACCAGCTTGCTGATGATGTTGAGGAGT  
TGCAACTTACGTGAGGAGATCTCCGAGAGACATTTAATTGCTTCAGACAAGTTTGAGAAACTCCAACTGA  
GATCCAACAGAAGATTTCAACCATTTAATTATGATATGTTTCGCAAATATAGAAATAGACTGCTTAAAGGCCA

>TCONS\_00043572

GAGGAAGAACTGGTAATAGACACAAAACCATCCATTCTGGCTCTATATTTGTTTGAATAAAAATGCTTAGCCA  
ATTCCATGCGTCTAACCAAAAAGTCCTTTCTTCTTCCAACCTTTTCGATCTTCCCATTCATTCCCTGTGTGCCCTC  
GTCAAAACCACTAAAATCATAACATAAAAATGCATTGTGGAATATTCGAAAGCTTCTTTTTTTTAGTCCAGCA  
AGGTGGTAAACATAAAAATAAAAAAGCAGAAAGAGAAATGAGACTTTTATTTTGATCGAATTTTCTATTTTATA  
TATTTTATTTTACTTTTACAAAAATTTTACAAAAAATGGGAATTTTTTCTTGTTGCTTGAATATTAACCTATTCAA  
TTAAAATGAAATATTACAACCTATAACAGGCATTTTGGTTTTCAAATTCAAATT

>TCONS\_00043682

ACTTCTAGTACACGCTAACATAATCAAAATAACCGCATCGCACCATCTAGAGAAAGATCCTCCATGGAAACT  
GGTTTCCATCAGCGGTACTTAATGAAGCCAATTTCTTTGCATTGCTGCGGAAGCACTGCCTGCAGCACATAA  
GCCCATACTTCTAATGATGGCATGGGGATTGCCACATACACGGCAGGTGCGAGAGCCAGGGCCGTAGTTTT  
TGGGGTGAGCGTTCCAGATGTTGGAGTGACCCATCTTCTGAAGTCGGCTGCAGACTGCGCTTCTGAAATGTAT  
GCAAAAACCTAAT

>TCONS\_00043713

ACACCGCTGCTCAACTCCCTTACCAAACCTCTCTCCCTTTTTATTTCTGTCAAAAGTTTGAGCAATTTTGACAGC  
AATTGAATATCTTAGCTCAGCCATTTGCAAATTCCAATAGTATATTTCCACTTCAGAAGGTATGATGCAAGGT  
TTCCACCATGAGCATTTCAAACCTGGTCGACAAAAGCAGACAACCTATACAGCACAGCTCTTCATCTTTGTCA  
TCAAATGCTTTAGCTTTTTCTACAGATTCCATTGCTTCTTCAAATGATTTCCAGCTAAGGCAGCATTGAGGAGA  
AACGCGCGCGTGTTTCATGAACCGCATAACCATCTCCAATTTGGTAAAAGCGCTAGCAGAACCCCATTTGCA  
GGCCGACTATACCCATATCCATAACCGTGATTATTCCTATAACTGTTCTGATAACTATTACGGTAATAATTGTC  
ACTATTACCACCACTATAATAATTATTCGCAGAATTTCCGTAACCTATTTTGATGAATATTGTAATCGGCGCGTT  
TGCGATCGTCGATCAGAGTCTCGTACGCTTCGGAACTTGCTTGAATTTGAGAGTAGCGTTTTCTTTAACTGC



TGCGGTGAATGTGCGTGCTTGTGCGGGGTGAAATTCCATTGCCAATTTTCGAAACGCTTGTTTAATATCTTCTTT  
GCTTGCGCTTCGTGTAAACCCTAATATTTT

>TCONS\_00043716

AATAACAACGTGTGATGCAAACAGATTTCAATGTTATATCTATTTACAAGTCAAAAGGAACAAATTCTTGTTT  
CATTCCTTCATGATAGAATACCATAAGTCTCTACATTGTCAACTCACCGAGTTGGCTCAAAATAATGCTGATTT  
AGATTGAGCTTAAAATCAGGTTCGAGGTCTTCTAAAAACCGAATAGATGTTAGACAGCTTTTGAAAAAGTTC  
ATCAATAATTCGACTGAATTTTGAGCCAACTCGGGAAGTGGCCAAAGGGTCAATGGCTTCCCAACTGTCTCC  
ACAGTCTCAACACCAAGAGATCCAAGGATTTCCCCAAATTGTTTAGAGATGCTCTGATAACTATTATTAATTT  
TCTCTTCTCCCTCTGTTGCCACCTTGATTTGCATTTTCGCTCTCTCAAAATTGTCCAGAACAGATAGAAGTTTCT  
CGACAACCTTCCCCTTGTCATTTCGTCACAAGAGAAAGTCTTTCTCTCTCTGTTCTCTTACGGAAATTGTCGAAG  
TCAGCACTGATTCTAAGAACTCGGTCCCTCTCACTTGACAGTTCTTCAGTCAATGAGGCTACTTTTCTCTGAAG  
TTCAATTTTCTCATCTTCTATGGACTTGAGGGAAATTTCTATCTCTGCAACTTTTGAATCGTCATTATTTGCTAA  
AGCATTTTCGGTACAACCTGCAATGAAGTTGCAATGAATGATGCAGTTTCATCTGCGGCTGCGTTGTCACCCTCA  
TCCGAAGCATCTTCAGCAG

>TCONS\_00043717

TTTTGCTCTTCTTTAGGCTCTGCTGTCTCTGGCTTTGCCGGCCCCGGGGCCAGCCGACACCTTCACCATTGAAGG  
ACGTAAGAGTCTGTCTCCAAGTTTGAAACCTTTGCGATATTCTTCTAATACAACACCTTCTTCAAATTCTTCTG  
AATCCTCACGCATTATAGCTTCGTGCAGCAAAGGGTCAATGGCTTCCCAACTGTCTCCACAGTCTCAACACC  
AAGAGATCCAAGGATTTCCCCAAATTGTTTAGAGATGCTCTGATAACTATTATTAATTTTCTCTTCTCCCTCTGT  
TGCCACCTTGATTTGCATTTTCGCTCTCTCAAAATTGTCCAGAACAGATAGAAGTTTCTCGACAACCTTCCCCTT  
GTGCATTTCGTCACAAGAGAAAGTCTTTCTCTCTCTGTTCTCTTACGGAAATTGTCGAAGTCAAGTCAAGTCA  
AGAACTCGGTCCCTCTCACTTGACAGTTCTTCAGTCAATGAGGCTACTTTTCTCTGAAGTTCAATTTTCTCATCT  
TCTATGGACTTGAGGGAAATTTCTATCTCTGCAACTTTTGAATCGTCATTATTTGCTAAAGCATTTTCGGTACAA  
CTGCAATGAAGTTGCAATGAATGATGCAGTTTCATCTGCGGCTGCGTTGTCACCCTCATCCGAAGCATCTTCA  
GCAG

>TCONS\_00043754

TAACCTCTTCAAACCGGGAAAAAAGAAAAAGAAAAAGAAACCTCGAGGGAAAAATAGAAGACGGCAGTAA  
TTACCCCCAAAGTCGCCCCTCTTCTATCTTTGTCCCGCACCTGCCTCTCGCCTTTCTTCTTGCTCTGTATCTTC  
ACCTACAGCACTCTGAGTTGCTATCTCACACATTCTCAATTCCCACAAATCACAACCTTACACAATCCAGAGAG  
TTTTCTTTCTTCGACTTCGTGCGAGTTTTTCGAGCTCCTTTTGACTCTCCAGTTCCATAGGTCATAGGTGAAGCTC  
AGCCAAAAGAATTGCCGTGTTTCAGAGATTTTGTACCCTTTCGTGGACTCTTTAGCTTTTCGCTTCGTGGAAAGT  
TTGACATGTGAATTCCTATGCTGGAGACGCTGCGTTAAGGATTGAGCAATTTTGATTTGGACGTGAGGAGCTG  
AGGGTTTCAGAGCAGTTTTTCATTGAAGTTGTGCTATGGAAGCCGCCATTCTCAGCTCTTGACACACCGCTTTCC  
ACAACGGCGGACCTCAGGATTCGAGGTTCTGTTTGGTTGATATTACTTTACTTGCTTGAGGGCGTTATCCTATA  
AATATAATTATATTTTCCAAGTAAAGCAGTTTTACAAGGGGATGTCATTATGTTAATACCTTCCTAGGAAAAG  
CAATTGTTAAGACTTGTAATTTTAGCGGTGAATTTTCTTGATTTGAACTAGAGAATATATTTTAAATCTCTTGA  
TTTTACTGTATACAGATTGTGGCAATATATAACTTGGGTTATGCGCCATTCTTAACAAACCTAAAGCATGTTTA  
TTTGCTTCACCAGT

>TCONS\_00043804

GGAAAATAAACGATACCGAACAAATCTACTGTGTGTGTGTGTGTTTGCTCGTACGCCGCAAGCGAATGAGAA  
AGAGAGAGAAGACAGTGCCTGTTGTAAGTGTCACTGAACGAATCAAATGTTCAATTCAAATACCTTCCTAATC  
TCCGCCATAGATTTACAGCTCCCAAAGTATTTTCTTTTCTAATAAAAAATACACATTAGAATATACATACTC

GCTTTGCCTCTTCTTCCCTTACAGCCCTTCTTGAAGATACAACCTCCGTCATTTCCGCTACCTTCCTATTCAATT  
GCTCAAACCTCATCCAGATCAACCAAGTAATATGACGAAGAATAAGAACCAGACAATCCAAAAGTGCGACGG  
CCGAGACTAAACCTCAGATCCAAGGCCGTAAACTCTCCCCCTTATGCACGCCACCAGCTGCCTTAATCCACATGT

CCATGATCTCCTCTTGGGTTGGTTGGATTGGCCTACCTTGATCATCAATCGGCTGGCTTTGAATGAACTCCTCC  
AAGATTTCGTTTGAAATTATCATTAGTTGTCTCAGCACGCGGCTCGATCCAAGTCGTTTTTGTTCATCCTTCAA  
CTTCTTCGTGTGGGTTTCCTCAAATACCTCATCATGAGTAACTGGTCTTCTTTAGCATTTTCCAATCTTCTTTG  
ATGAGCCGCAACACTAATTGAGC

>TCONS\_00044113

GCGTCCCATTATTGATAAAGTCATTCCACATTGCTGCTGTAATGGAATCTCTCAAGGCAGAGGCACTTTGTTT  
TTGTATTTGAAAAGCCAATTGTGGATCAGGCTGGTCATCTAAATCAGACGATTCTTCTACTGATGTTTCTTCAA  
TGTCTTTAAACAACCAATCACTCCTTTCCTCACGCCGGATGTGATTGTGAATAACACATGCAGCTATAACAAT  
GTCCCTTTGTGTGTTAAAAGCATATTGAGGGGCAAGTTTCAGAATTGGAAATCTCGTTTTTCAGCACCTCAATA  
GATTTCTGAATGGCATTCTGAGTGATGCATGCCGGTGGTTAAATAACTCCTTTGCACTTCTAGGTAATAGATT  
AGCACCCCGATATTCATGAAGATGACATCGAATTCCTGGAAATGGAGCAATAAATCCATCCATATTAACATA  
ACCTGTATCAACAAGATAATATTTCCCTTCAGGAATTGGAGGGAAGTTCTGATCGGGATCATCTAGGACAGCT  
CTCAAACCCGTGAATCTGAAGCTGAGCCTTCCCAACCAGGGTATACAAATATAAATTGGAGATCAAATGTG  
CAAGCGGCCAACACATTTTGTGTCAAAATACCCTTCTTATTACGAAAACGTGATTGATCCTTGGCTGGCACAT  
GAGCAGGGATTTCGCATGCTATCGATCACACCAATGCAATCCTCAAAATATGGGTAGAATCTATTACTTTCAA  
GGATCTGGAGAGGAGTGCTGACTGGAGGAAGTTGAAGGAACCTCGCGGGATAACGACTTAATTGCCCTCAAT  
ACATTATTAATAATGCCTACTTATTGTTTCACCAGAGTGCTGATAACGCTCTTGTATAACCCTGTTACGTTTCGTT  
GTGGCCAACAATGTTCAAGAAAATTGCCAATTGCTCCTCTATCATAACGCCAGGTGTGTCACGTAGCATGCCT  
CTTTGTCTGAAGGATGCTACATAGCTTGTGAAAAACATGTTTATCCATCCTTAACATTTCCCGACACACATCATC  
ATTGGCACTGAGTAGTTCGCTCAAGAAGCCAGACCCTTTAGGAGTTGAACTACGAGAAGGCTGCCTAGTTAT  
ACAATTATAATAGTGATAACCAGCAGCAGCAGCAACTAATTCCATTTTCATCCAATTGTATGTCGACATCATCC  
ATGCTTGGTG

>TCONS\_00044323

CTCGATAAATACAAACGCCATTGCTGACGCGTCAATTTCAACAATTTTCTCTGCTGTTCCCCCAATACAATTT  
ATTCGCTGCGCCGTGCGCCTTTCATTTCTCTGCAAATTGACTGCTGCTGGAGTTAAACCTCATTTTCCATGGT  
GATGTTGGAGCTAGCTTGTGTACATCTCGACTAATCCACAGATTACCTGTTACCTCCCATCAGCGGAGGTACT  
GGTAATTCTGCTCAC

>TCONS\_00044508

CTGGGCTTTCTCCTCAGCTTCATATTGCCCTATAAGTTGCGTTTGCTGATTTAAAGCTCTTTGCATGTCTTTATC  
ACTCTTATCTGCTAATCTTCCATTTATTGACACACCTGATGCAGTCACTTGCATTGATCATTTGCATCACTGTT  
ACCAGCGCCGTCCGTCAATGATTGAGGCCATTGTTAGCAGAACTTGGGCGAGCCTCAGAGGCACATTCAGC  
AGAACTATTTTGTAACCTCATCACTAGCTGATCTGGTATCCCTGCGCCTTATCCGTGCGCATGATTTACCAACCC  
GTTTTGAAGAAGAGATGCC

>TCONS\_00044521

CCTTGCTTGTCTCCAGCCTTAGAAAACCTATGAATCCATATTCCATGATGTCTTTTTGGGGTTTCACTTCATTCTT  
CTGCAAATGCAAATTAAAGAGGCATTAGATCCCAGTTTCAGAGCAGAATGGATATATAGGAATCATATAGCC  
GGCCTCAACTGATTTTGGATTATGGTTTAGTTGATTAATTAGATCATGGATTACGCTTATGCAGAGATAAACA  
AACTCTAACTCCGGCTTATCATGTCAAGACCATCGTATTCCTTCTTCTGCTTGTAGCCTAATTATCTCATCTGG  
CAGGCGGATTCTCTAGGTTATATTCTTGTGAGTGGACATGGTGGAGTGGAATTAAGCTGTAACGGACAAT  
GCATGAAGCAGAGTGTAGCGGAGACTTTAAGGGAATTCAACACACAGCTCTTGGATTTTTCAGGTTAGTAGT  
GGAAACATGTAGGTAAATATGGATCTCGACCTTGAGAAGAGAGCTTGTAGTTATTCTAGGTTGGATTTCTGC  
TTTCAGTATATTATAGATGATTATAGAGGACTTACTGAATTTGTTTAGGTTCCATCAAAGTAGTTCGCTACTAT

GGCATAGAATAGCGAAGATGTTGCAATTCATTATTCAATCGTTGGATTGGAACAAGTATAACTTGTTTTGGAA  
CTCTGGATGAGCGTGGAATTAGGTTACAATAGGCTACAATTACGAATTAATTGGCATCCGAACAAACCCTAA  
CATAAGTCCTAATTTGTGCTAATAAAGCAT

>TCONS\_00044523

TTCTTCTACCAAATTCATTCATTCACAAATGCCACTGCGTCCAGAATGAGGTCATTCCTTGCTGTTTGTGTGTTT  
AACTAAAGCTCTTCTCTCGGGCACGACGTCGACGACAGGGCAACTTTGGGATGAGAGAACTTGCACCAACTG  
CCATTGGTCCTATTATATATTGTATAGATGTCCCAAAAGGCGGATTCCTCTAGGTTATATTCTCTTGTCAGTGG  
ACATGGTGGAGTGGAATTAAGCTGTAACGGACAATGCATGAAGCAGAGTGTAGCGGAGACTTTAAGGGAAT  
TCAACACACAGCTCTTGGAATTTTCAGGTTAGTAGTGGAACATGTAGGTAAATATGGATCTCGACCTTGAGA  
AGAGAGCTTGTTAGTTATTCTAGGTTGGATTTCTGCTTTCAGTATATTATAGATGATTATAGAGGACTTACTGA  
ATTTGTTTAGGTTCCATCAAAGTAGTTCGCTACTATGGCATAGAATAGCGAAGATGTTGCAATTCATTATTCAA  
TCGTTGGATTGGAACAAGTATAACTTGTTTTGGAACCTCTGGATGAGCGTGGAATTAGGTTACAATAGGCTACA  
ATTACGAATTAATTGGCATCCGAACAAACCCTAACATAAGTCCTAATTTGTGCTAATAAAGCAT

>TCONS\_00044525

CCTTGCTTGCTCCAGCCTTAGAAAACATGAATCCATATTCCATGATGTCTTTTTGGGGTTTCACTTCATTCTT  
CTGCAAAATGCAAAATTAAGAGGCATTAGATCCCAGTTTCAGAGCAGAATGGATATATAGGAATCATATAGCC  
GGCCTCAACTGATTTTGGATTATGGTTTAGTTGATTAATTAGATCATGGATTCAGCTTATGCAGAGATAAACA  
AACTCTAACTCCGGCTTATCATGTCAAGACCATCGTATTCCTTCTTCTGCTTGTTAGCCTAATTATCTCATCTGG  
CAGGCGGATTCCTCTAGGTTATATTCTCTTGTCAGTGGACATGGTGGAGTGGAATTAAGCTGTAACGGGTGAG  
CATTACTAGTTTTATCGCCACCTTATTCTCCAGTGACCTCCCTTATTCAGGCATCACGACTGTTTGATGGCTGA  
CTTTTGGTCTCAAAC TAGTATACCATAAACTGGGGAAAAAGAACCGGTATCAGTTTGTTCTGCACTATTCGT  
CTGGGATAAACTATTCCAATTTCCAGCATGCATCTGTTTGATTGATATGGTATTCTTGTTGGTTTATCTTTCTG  
CTTATATAGAACTTGTTGAAACAACAAATGCTGTATCAGCCAGAATCTATAACTGTCTCTGGTGATGATGACA  
GA

>TCONS\_00044530

TTCTTCTACCAAATTCATTCATTCACAAATGCCACTGCGTCCAGAATGAGGTCATTCCTTGCTGTTTGTGTGTTT  
AACTAAAGCTCTTCTCTCGGGCACGACGTCGACGACAGGGCAACTTTGGGATGAGAGAACTTGCACCAACTG  
CCATTGGTCCTATTATATATTGTATAGATGTCCCAAAAGCAATCAATAATCACAAAACATCCAATATCTAGG  
CAGAGCTGAATGTGCACTCAGGCTTGATGAACCTCTTTCTTCTAGCTTGATCAAGAATGGGATTCACAGAAGT  
ATCTCTTAGCTATAGGGCTAGTTGAGAAAACAGAGAGCTGTCAGTCTTCTGTCTAATGCAGTTGTAACCTGTTT  
TGAATGTTATAGTGG

>TCONS\_00044622

CCTGAAAAACTGATCTTATGAGAGCTTCATCTTTTTCTCCTCCAGCTTCCTCGCCTTTGCCTCATCTGCCCCGCTGCA  
AAGCTTCAAGCATTGCATCTACGCTCACAGTTGCATGTCTTGACTTCATCGATTTTCATCTCATCTAATGCAGCC  
ATAATATCCATTTCTCTCTTCCGAATCCAAGGTTCTATTTTCTAATGACTTCATTGCATCACCCATTTCTTCAGCA  
TCTCTTTTTTGTCTCTCTCCTTCTCCATTTCTCATCTTGCCACGCCAAGGCTCAAATTCCTAGTCGCACCTGATT  
CAACAGTATAATCGGAATTTTTTGGATCTGTCTTATATGTAATCTCCGCGGAGCACTTTGTGCACTTAAAGTAG  
AATCTGAAGATTTGTATTCTAAGTAGGTCTCGCCAACGACGTCCTCTTTGCGGGAATTGAATTTGGTTCCCTT  
ATAGATGTAATTGCCGCAAGTAGCACACGAATGCTCATAGGAAGCATCATGCGCACTTTCATCTGCTGATT  
GGGAGCTGTCTCCGCCGTGGAATCTTCGCCGGATCGAAATCCGGCGGATAATACTTGTTCAATACTTTCTTTT  
TCCCATGGCTCCTCCTTCTTCT

>TCONS\_00044639

GGAAAAGGGAATATACCACAAAACAGAAACCATAAACCCCTATTTCTCTCTGTCCCTCTCCCAATAAAGAAAA  
TGCCGTCATTTCCCTCGAGCAGGCTCAGTTACCATCTGCGAGATCAACCGAGACCTCATCACTGCGGATGAACT  
CTCTGATGATGGAGCTAAGGAAACCTACGGCAAGCTTCTGGTAAGTTCTTGAACTTGTAAGAAATTCTGAA  
AGATGAATGGCTTACTACGATCAATACCCAATTAGTTAAAGTGGAAGTGAGTTAAAATATTGTTAAAAATTC  
ATCCAATTAGGGTTGGTTT

>TCONS\_00044643

AGTAAGCCATTCATCTTTTCAAGATTCTTTTACAAGTTCAAGAACTTACCAGAAGCTTGCCGTAGGTTTCCTTAG  
CTCCATCATCAGAGAGTTCATCCGCAGTGATGAGGTCTCGGTTGATCTCGCAGATGGTAACTGAGCCTGCTCG  
AGGAAATGACGGCATTTCCTTTATTGGGAGAGGGACAGAGAGAAATAGGGTTTATGGTTTCTGTTTTGTGGTA  
TATTCCTTTTC

>TCONS\_00044659

CAGGGGTTTTCTCGGGCCTATTCATATGGTACCTAACGTAATTCTATGATACTCGTGCGGACTTCGGGGCTCTCC  
GGTTCAGCTAGGTCCATAGTTCCGGAATTTATACGCGAATCAAGATCGATAAAAGGAAGTTTTACAATCACC  
GACTCAAACCCATTGTGCAATTCTACTCAGCGGTATATGGAGTTACTTATGGCAGAACGGGCCAATCTGGTCT  
TTCACAATAAAGCGATAGACGGAACCTGCCATGAAACGATTATTAGTAGATTAATAGATCACTTCGGAATGGC  
ATATACATCACATATCCTGGATCAAGTAAAACTCTGGGGTTCCAACAAGCTACTGCTACATCCATTTTCATTA  
GGAATTGATGATCTTTTAACAATACCTTCTAAGGGATGGCTAGTTAAAGATGCTGAACAACAAAGTTTG

>TCONS\_00044686

GAGAAAACCCCTGTATAGCTTCTTCGATTCTCGATAAAGAGCAATATGACCAATAGTGGTTCGAATGTATAT  
AAAAAGGATTTGTTTTTTAGACTTCTTACTATTAGATAGTGTCCATAAATCTCATAAAAAGTACCTAAAGATTC  
ATAGTGAACCTTCGATGGGAGTTTCTCTTGAAGCAATAACGCGTTGATCTAGTCGCCACCGG

>TCONS\_00044687

AAACTTTGTTGTTTCAGCATCTTTAACTAGCCATCCCTTAGAAGGTATTGTTAAAAGATCATCAATTCCTAATGA  
AATGGATGTAGCAGTAGCTTGTGGAACCCAGAGTTTTTACTTGATCCAGGATATGTGATGTATATGCCATT  
CCGAAGTGATCTATTAATCTACTAATAAGTCGTTTCATGGCAGTTCCGTCTATCGCTTTATTGTGAAAGACCAG  
ATTGGCCCGTTCTGCCATAAGTACCTCCATATTCCGCTGAGTAGAATTTCGACAATGGGTTTGAGTCGGTGATT  
GTAAAACTTCCTTTGTTTCGATCTTGATTCGCGTATAAATTCCGGAACCTATGGACCTAGCTGAACCGGAGAGCC  
CCGAAGTCCCACGAGTATCATAGAATTACGTTAGGTACCATATGAATAGGCCCGAGAAAACCCCTG

>TCONS\_00044688

AAATACCCCGGGCGGTGCCACAATCCGTTTCGACGTACAACAATGTGTTGAACTACTTCAACAAGTCTGCGAG  
TGAGATATCCAGCGTCTGATGTTTCGTACAGCAGTATCCACAACCTCCTTTACGGGCTCCGTAGCAAGAAATGAT  
GTATTCTGTAAAGAGAGTCTTTCGCGTAAATTGCTTTGAATAGGTAAATCAATCATTTGTCTTGAGGATCTG  
ACATTAATCCTCTCATACCTACTAATTGATGTACCTGAGATGCATTTCTCTAGCTCCCGAGAAAGACATTATA  
TGAAGTGGATTAAAAGGGTCAGTCATCCTAAAATTAGGATTCATTTCTTGTCGCAAATATTCATTGTAGCAT  
ACCATATTTCAATGGATTGACGTAATTTTTCTACCGCGTGTACATTCCCATATGATGGTGTTTTTCCAAAATC  
AAACTTTGTTGTTTCAGCATCTTGAAGTACCCATCCCTTAGAAGGTATTGTTAAAAGATCATCAATTCCTAATGA  
AATGGATGTAGCAGTAGCTTGTGGAACCCAGAGTTTTTACTTGATC

>TCONS\_00044689

GAAATACCCCGGGCGGTGCCACAATCCGTTTCGACGTACAACAATGTGTTGAACTACTTCAACAAGTCTGCGA  
GTGAGATATCCAGCGTCTGATGTTTCGTACAGCAGTATCCACAACCTCCTTTACGGGCTCCGTAGCAAGAAATGA  
TGTATTCTGTAAAGAGAGTCTTTCGCGTAAATTGCTTTGAATAGGTAAATCAATCATTTGTCTTGAGGATCT  
GACATTAATCCTCTCATACCTACTAATTGATGTACCTGAGATGCATTTCTCTAGCTCCCGAGAAAGACATTAT

ATGAACTGGATTAAAAGGGTCAGTCATCCTAAAATTAGGATTCATTTCTTGTGCGCAAATATTCACCTTGTAGCA  
TACCATATTTCAATGGATTGACGTAATTTTTCTACCGCGTGTACATTCCCATAATGATGGTGTTCCTCCAAAAT  
CAAACCTTTGTTGTTGAGCATCTTGAAGTAGCCATCCCTTAGAAGGTATTGTTAAAAGATCATCAATTCCTAATG  
AAATGGATGTAGCAGTAGCTTGTGGAACCCAGAGTTTTTACTTGATC

>TCONS\_00044755

AAATCAAGTGAAGATATATGAAGATCATGAGAGCTGGGAATAATAAGTTACGAAAGTTTGAAGGAAGCGAA  
CAGCGTTGCAGCTTGAAGCAACCTCCTCCACTGTGCATGTAGACGTAAATGCCAATCCCATGATAACATTAC  
ATGCTGCTGCACCTCTAGCTGTTGCAACTTCTCCTTCAGAATGTGCCAATTGATGTGAGGAAGTTGGAGCAAC  
TATAATGGGAGCCGACGTCTTGTTACCAAGTATAACAGTTGACATGTCTATTTTGTCTACATCAACAAGCATT  
CTTGGCCGAATAGTGATTCTACGAAATGCTTCTGTATTTTCTTTTAGTGTATATTGATCCTCAGATCCTCCTGCA  
AAGAAGTCATAGTACATCTTTGGAAGAGCTTGCCTAGCTAGCTCTTCAAATTCATTTACATTAAGTGGTTCACC  
TGCCATTTAGCCTGTAGGATACAGAGAAGAGTACACACTCTCCAGTATCT

>TCONS\_00044803

ACCCACATTTCTTCGCCCTTCTGTTTTTGCAAGACTTAATAACTCTTCAGCTTCCTCCCATCATCACCCCACTTT  
GAGAGAGAAGACATGGCAAAGGAAGTTACGAGAAGGCCATTGTTTCACTCCAGAACCTCCTCAGTGAGAA  
GGAAGAACTGAAACCGTTGTAGCAGAAAGAATTGATGAAATCACAGCTGAGTTACAAACGACAAGCTGC

>TCONS\_00044825

CCAGAAAGTCCAACCTCGTAAATCCACCCGATTAAGTTCTATCTCAGTCAAATTTAGAACCTTTAAGTGCAGAG  
TAATCCTTCCATCACTTGGATCAGTTAAATGATATGCTTCAACATAGCAAGGATCACTGCTGCTAGTCAAAGT  
ATATGCACTTGGAGGAACCTTGAGTAAAGTTGAGTCGACTCGTTTAGCCAGCAATAGTGCTAGCTCACTAGG  
ATCAGGCCTCCAAAGCTCTAAAATAGCCTTGTGAACCAATCCTTC

>TCONS\_00044941

CCCCATCTATAACCATTTGGGACATTGCACTCTCTCGCATGCTTCATGATATTACTTACACAGTCCAGGAGAAA  
CGGATCCCTTCCAAGGCCTGGACCAACAACAAGACAATCAAACCTCTCCATCCACTTCTCAACCTCAGCAAT  
CACTTTAGCTGCTATTGAACTTTTCTCCTCGTCCCTAATACTGTAGGACTCTTCTAGAATAGGGTGCACAATTA  
ACTCAGGACTGTAGCTTTTTATAACAGGAGCAGCATCCTTGGTACAGAATACATGGGATAAATCTGCACCAA  
TCTTTAAGGCTGAAATTGCAGAGAAGTATGGTGCACCAGTGTATTCTCGGCAGCCACCAACAACAGCTATCTT  
CCCAGCTTGGCCTTTATGCTTA

>TCONS\_00044989

ATTTTTATAAACCATAGGCTGTGCTATAAAACCTTTTAATGGTACATACATTAAGAATTCTTAATAGAACTTGG  
TTGCTAGTACATCTAGGAGTTTTAAACTGGCTTAATGCTGCTCCATTTCTATGAAATGTTCCAAAATCTTCTT  
AAATGTACCTCTCTCAACAATGCAAAGTTCCAATGGTCCAATTGAATTTGTTTTCTTGATACAACATATCCAT  
GATCCACAAATGAAGCATCCATTTCTCTACAACATTCTCCTAAAACCTTTTTCTTCAACTTCTCCTTTGATTTCCC  
AATAAATCACATAATGGCCTGGTCTTTTTGCTACATTTGCATGACTTGTGAAATCAACTAGCTCAGCTCTTGAT  
TTACTAAGTATCTGCGAACCTCTCTCCACCACTAACTGGAGGTCTTTTTCGGTGTCTTATCGATGTTTACTGTT  
AATATCAGCTTTCTCCTGTAAAAGTGGTGAGGACAATCTCATACTCTTGTCCAATCTTGACTTTAGATAAGGG  
AACAGGGTCATCTTCAATGAAGTCATCAGTGGCTAGATTGGCATCTTGGCTATTATTGCAATTTTGTGACTTGG  
TTCTATGTAGTGGTATGAATTCAAAGTAAGCAAAAGTGGGTATTATTGCGAAAGTAACTTTCTCTGGTGGAGA  
TGAAGGTTCCACATTTACTCCAATCCAACCTTTCTGTGGACCCATAATCAGCACTCACCAAAGGCAACTCCCCA  
GCATAATGCCTCAGTTTTGTAAATATGGTTGCACTGAGCCAGTCATTATTGAGTAAACATATTTAGCATTTGG  
CCATAATCTTGAATTATGCTAAACCAATCTTCCTTTTCTACTTCCTCACAAATTGATTCAATTCTTGAAGCCA  
ACTCTGGATTTGGCAAAGTCATACCTGTTGAAGACATAATCAACTAATTAATA

>TCONS\_00045017

ATAAAGGTAAACATAATTCAGCATAAGAAAGATTCAATTGTCACTTCACCTTACGTTTACTACTCTATATACATT  
TATCTGCCTCTTCCTCCTTTACATGAATAATAGGTTCTTCCACACAAAAATTTCCATTCCCTTTTCTTCCCAAGT  
CTAAATTTTTCCATGTCAGTTCAGTGTTTTTCAGACATCAAATTAGGCCCTTCCCCAACTATCCACTCATCCATG  
GGATCAAGAACATCGTCTGTAATGTCATTACTTCCTTCTGGATCAAAAAGCTTGTAATTGCAAATTACAATGGA  
CAAATACCAAATCACGCATCCTCTGCTGCTCTATCGGATTCCCTCCCTTGTGTAAATAGTTTCTCGACCAAGCTC  
CTTTTTAGCCTATAATGTGAAGCACCATTGCATGTCTGACTAAGGATTCGAACAGCAAGCCTTTGTAGTTTCGG  
GACAATGACCTCCATATTGTGACCACCAAATTGCTGGGGAAATATTTGATAACTTCTCTTTGAAGCTACCAAA  
ATGAAATGTGCCCTCCCCATGCGATACTCATCAATTTGCAGCGTGATCTTATCCTGTATATGACGATCTTCTG  
TCATACGAACAACACAGTAACAAAGACCACAGGAACTTCCACATCAGTGTAGAAGTCACTCGAATAAAAG  
AGGCTTGGGTTCAAAAAGTAACCCGAGGCATGGAGATGACTGTGGAGGTATTCATCCCACACGTCATCTATG  
GCTTCCAAAATCTTGCATAATGGGATTTCTTCTCTTTGAATTCCCTTTTGATTGTCTCTTTAGCTTGATCTATTG  
TGTCATATATAAAACCAACTAGTGGCTTATTAGTACTATTTAGCAATTTTATAATTTCCACAAGGGGAATGGTT  
GCCTTCACAGCCATCAAAGCCTCAGTCCAAAAGGATTCATCTTTGACCATTTCTGACATTTCTTTACCCTCACG  
TGTGGAAGCCAAATTCGAATCAGAAGACTGAAACATCCTAATTAAGTGTTCTTTCTGTGATACAATGTTCTCA  
AGAGTCATGAAGGGCACAATCGACCTTATCTTTGAAGGGCATACTAGCTCATCAGGACAAGCATCTCTCAGA  
AGCTTTAGGACAGTAGCATTACCGTAAATAAATTGTGTCAGAGATTTTGCCTTCTCCAGAACTTGTTGTATCGT  
GTCTATCGCTGTGAATTTCTGTAACATAAGTTCATGCAATGAGAAGCATCTACTGTCCAAAAAACTGTCTTA  
AGTTTTTCCACTAGTTTCTTGCCTGCTTCCATCATGCAGGCAGCAGCTGTGAGTATGCAACTATTTGGACCAC  
ATTTTCAACTCCAATTCTCTCAATAACTTCTCGAAGAACAATTGCATGGCTTCAACATTGCTATTGATAGATG  
AGATATCTGACGACCGAAGGTAAATGGTGCCTCTTGGGCAGTAAACTAGGATATTAATCAGATTCGACCCTT  
TGAATCTACCCATCCATCTAGCAAGATGCTACATCCTGTACTTGCCCATGAATTTCTTATCTTCGTTACATATT  
GTTGCATCTCTTCCACTGCATCCTGAAGGATCCGCCCTTTCAACTCGTGACAACCTTGGGAATATTATTGTCTTC  
CCAGGACTAAGGGTGGCTTTTACCATCTTCTGGAAGCTAGGTGCTCTAATAGCGTCAAAGTCAATTCCTTCTTC  
ATAAAAAAATCTCCCTATAGATTTCGAAATCTCTCGTGAGGATAAATCTACAACAGAACTACCAGCTACTTTT  
GAATTCACTCTATGATGCTTTTTATTTCCATTTTCAAAACACCGAGTGTCTGTCTTATTTGGTTACCATCACCT  
TCTCGAGGGCACCAGTTCGCTTCAACGGAAGATTTGGGTGGTAAATCTGCTCAACTTCCTTGATTAAATTGC  
CGTTTTTCTTCTCATGTAGCTCGGCTTTCATTGCTTCTTTGACAAGTGTAGGAGCCTCCAAGCAAGGAGTGACA  
TCTCCTCGAACGCCTCCTAAGTGGTATTTAAGCCG

>TCONS\_00045024

AAATTGCTCAAATATTTAAAAGGGGATGTGGATAGACAATTATCAGCTGAAGATAGGTATCTTGGAGCTTTTC  
TTGTACAAATAACTGCAGCGTTTGGCACTCCCTTGTCAATTCGGCAGCGTGCAAGGCATTCTGGATAGCAGC  
TATTGTGGCCTCACAAATTCAATGAGGTTACGGGATGATTAGACATGAAAACCAAGAGATATTCCAAAACAT  
GTCTGATCAATGGATTCACTTATTCTTTAATCTGCTGATCCCTTTGAGTCCAATAGCGGAAGAACACGAACTG  
AATCAGTATAAATGTGTCAAGAAGTACACATCCTGCTGCATCCACCAGCCATGGTAGGTTTGGTCCAATTTTT  
GACCAATCTAAGCTGCTAGCAAGTATGCTTGCTACATATGTAGTATTCCCTAGCAGAGCAAATATGAACATTA  
GTGGATTAAGACCCTCAACATTTCCCTTCTAATATTTAGGCAAATCTGGGGAAGGCGTCCACCCATGTAAAT  
AGCTGCCATTCCCAGCCAAGGAATGATCCAACCTCCGCCGCTATTAGTTGTGGTATTCACCATCAAGGTTATA  
TTCACCTGTTGAAGCTTTC

>TCONS\_00045050

AACCGTCTCAACGCATTACAATCACTCTGTCAAATCTAGAACTTTTGACCATTAAAATCAGCAACAGACCTT  
CAGTGGTGGACTAAAGATGCCAGGGAAAGGTGGATGTCACATGATGGGATAATGTAAAAAGTGTGCCTTCTC

CTTTTCAAACCTGCTGCCTTCAAGGTCGGCAATGTGACAAGTCTGAAAATGAAGGCTGGGCAAATTCATGAG  
GAATGGAGGGCAATAGTGACTGGAGGATAATATGTGATTGTGACGCCACGATGGATGGGAGAACTCTTCTTG  
AAACAAGAAGAGAACTTGTACGGTCAGGAAACGAAATAGACACCGTCCATCAGCAATGATTGTATGGAC  
ATTCAATGTTATCCAGATTTTCATATCCACCCTATCAACCTTGCCATATCTTTTGAAAAGCCTTTCCAACCTCAGA  
CTGTCTGGTGTCAAACCTCAAAGTTACCACAGAAAATTGGTCTCATCCTGCCTGTACAGAAAAAGTCAGGACT  
GCTAAACCTGAGATGAGAAATGTAGATGTGCAGGCGTTCTGTAGTATAGAAAACCCTAACTGCCACAACAAG  
C

>TCONS\_00045150

CACGGGAATACAGTTCAGTTCAGCAGTCAGGCGCCACCTGGAGAGCACGGGAATACAGTTCAGTTCAG  
CAATCAGGCGCCACCTGGAGAGCACGGGAATACAATTCAAGTTCAGCAATCAGGCGCCACCTGGAGAGC  
ACGGGAATACAATTCAAGTTCAGCAGTCAGGCGCCACCTGGAGAGCACGGGAATACAATT

>TCONS\_00045233

TCACAACTAAACAGTCTCATAGCATGACAAAAGTAGTTCAATTTGTTCTGCAAAAAGGATGGTTAATTCCTAGAG  
AAAAGCTAAAACCTGCCTCTTCCTACTACTACATACTTCAAACATGGCTGAAAAGCAGAACAAACATATACTA  
GGAAATGGTTCATTTTTTCTTCTTGGCGGGTGGTTGATCCTCCTCGTCCTCGTCATCTTCCTCGTCTTCCTCTTCC  
TCATCATCATCCCCGTCCTCATCGTCTTCATCATCTTCGTCGTCTTCATCATCGCTGCCTTCGTTGCCATTAGCC  
GCTGGAGTCTCTTCGGGATCCCCTTCTTCATCATCATCTTCCCCTTCTTCGCCTGAAAAGTCTTCATCGTCAGCA  
TCATCGTCGTCTGATCATCAGCGTCTCCATCATCATCCTCATCGTCCTCTGTGTCACTGCCATCTTTGTTCTCA  
ACTCCAGCTTTTTCCATTTTATGGAGCTCTTCGAATGGAAACCTTTTCTCAGCGCCTATCAACTCTGGCAATGC  
ATTAGCATACTTGAGCATAGTTCCTGCCACAATGAGCAAAGAAGCAACAGATCTTTGAGCAGCCAAAAGGGT  
CTCAGCAAATACAGCTTCAACAACAGACTCCATCATCATTCTCCCAAAAACAGCTACTTCAGAGCTCAAATT  
ACTGACCTCCATTTT

>TCONS\_00045239

TTTGTAGATTTAGCAATCTGACCGTTGATTTCTTTTATCCCGAGTGTTCCCAACCGGGATGTTGCAGGGACGTC  
TATCTGTCAAATCTTGCTCTTGAGTTCTGAATTTAGGTTTTAACTTCTTAGGAGTTCCTTTGGCCCTCTAGAATA  
TCGTAACCTAATATATGAGTTTAGTCTTAAGTCTGTATGACTAAGTCACATGAGGAGGGAGGTGGATTGTTC  
TTTTT

>TCONS\_00045389

AAGCCCTTTATTGTGGGAGGTCATTGTAATTCTGGAAGCTAGAGGATAGCTTTCTGTACTGGAACAAGTTAGT  
TCAAAGTAGTACTATTTAACTTACACCTACATAAATATGTAGCTTTATTTAAAAGAAATTTGACATGTATCAC  
ATTCCAGCTAAGTTTTGTGTTGCCTTCTTTAGTTCATCAGATTCTGCTTTTGGAATGGATGTGATCAGGAGAAT  
GCTGCAGACTGGGCATCCAACCTATGCTCAGCTGATTGGAATCTCCTGAGGGGAGGCCAATCTTCTCTGTATC  
CCCTTCATTAAGAGGTAAAGTGGTTGTCAATCCAACGCTCTGGCAATGTGAATATTTTCGGGCCAAAGTCGAGTA  
TGTGTGTGATCTAGTGGCTAAAGAATCGCACAACTGAAAGAAATTGAAGCTACATGTACATATTAGCATAAT  
CTACTAATGTTTTATCTTGTTTTTGTTCATGTTTCTTATCATAGTAAACAAAGCATATAGCTGAATATTATTA  
CAAGATCAATCTAATTAATTTGTTTACTCTGCAGCAGTAGTCTCTCTGTGTATGTCTGCCTT

>TCONS\_00045438

ATATTCTTCATACCAATAATGTATGATGTTTCAATATTATCATTAGGCATTTGCTGCTCAGCATCTTTACACA  
ATTTTACCATATCACATGATGTATCCATCATTAGTAATTTCTCAATGCCGCCACGTCCGCGCAATAACCGTCTG  
ATAGCTTCCAGAGAACCCCCCATACACAATGTGCTTGGAATGTTCTCTTACA

>TCONS\_00045764



AAGACATTGTTAGCCAAAGGTGTGAATGGAATCGAAAGAAAACGGATAGAGAGGTTGGTTTTGTTTATGTAT  
 TTAGTGGAAGAATCCCATTGGTTAAAACCCCTCTGATGAGGGAGGCCAAATTTCTGAGGAAGAAGATGATTGGC  
 TGAAGCAGGTCTCCTCATCAGATCAGATCAGATCGAGAAAGAAAAAAGGAAGCCAATTCATCCTTCCCCC  
 TTTGATGTTATCCACAATTCCACCCAACCTTCCCAGCAGTCAGATTACTGCATTTGCTTCCTACGTACACTACAG  
 TGTCACTACTCGTGAAGACACAGAAGGTGTCGGGTGCAACTCCAAATAGTTAATTGAACTTATTATTAATTG

>TCONS\_00045887

CTGACGTACTCTACTAAACTCTAGCAACAGGCATCGCTACTTGACCCATTTACTTCCTACTTGATCCCAGCTCA  
 AGGAGCACAACGCTAATATGATGGTGCCATTTTCTTCTTTGTTAGAAAGCAAATGGAAGGCACACCGAAT  
 CGGGAGACAAGTCTAAGGAGGCACAATTGACACTTTTGAACCAAAAACCTTTTTGCACTCACAAAACACTCA  
 TAATTTTTTAAAACTACAACGTCCAAACACATCTTTTTTGCAAAAACCTTTTTCTCCAAAACAAGGATTTTCTC  
 CAAAATTGTCCGCACGGCCTAATATGCTCTCTGCAAGCTGAATGAGGGAGCTGAATTGCCTCTTGGAACCCCT  
 CCAAATCTTACACAATTCCGGGTGTAAATCTAATCTGATAAATGAGGATCAATGAGGAGCCTCTAAATGCC  
 GCTGTTCTGAACTTCCAGTCCCTTCCCTATATGAGACACTAGGGTGGTATATATTACACAAAACAAGTAACAA  
 TAATGAATATCTTAGACCACAACCATGTTATTTGTTGATCGGGTTGGATCAGAATGTATTGTAAAATGTGGAT  
 AATTTGGAACTAGTTAAGGAAGCTCCGAATCTGATGCATGACCAGATGATCTCCTTGTCTTGGGCTGTTCA  
 TAATCATTAGCTGACTTTCGGAATTCTGCCTTATAGTGCCTATTGTGGAGGTCTTACCGACCGTCCCCTTGGT  
 GTTCTCTGGAACAATGATCTCATGATGATGTTTGAGACAATGAAAAACAATATGGAAATTGCATAATTGGAAT  
 CGTTCCTCTTTTCTTTGTAGCTTGCACTAATAGTTGAGGATAAGGGAAGTGAAGATGCCGGTAGACTAATCTA  
 CAATCATTGCACAAGGTATCGCATGCATCAATTTGTAGGTTCTCTTGGAATCATTCTTGTCTGGCAATACTGT  
 GTTACTGAAGCTCATAGATACATAACCTAACTAGATGCTGTGGCTGCTCATATTTTCATGGTATTGCTAAGAAC  
 CCTAACATTATCTATGTAAAGGATCAAAGTTGATGTGATTTTAACTTTAAGATAAGAACTTCTTAACATGATT  
 ACTTTACATCTACCAATTAAGTGTTCATAGTCCTCATCCGGTTATAACAAATGAGAACTTATTTTGTGGATTT  
 TTG

>TCONS\_00045889

TTTACTTCCTACTTGATCCCAGGTTGCACTCTTGAGATTGCTGCTTGACTTTGTTGTTTCATCTGGACTATTTTTC  
 GTGCATTTTCGTTTAAAGCTCAAGGAGCACAACGCTAATATGATGGTGCCATTTTCTTCTCTTTGTTAGAAAGC  
 AAATGGAAGGCACACCGAATCGGGAGACAAGTCTAAGGAGGCACAATTGACACTTTTGAACCAAAAACCTT  
 TTTGCACTCACAAAACACTCATAATTTTTTAAAACTACAACGTCCAAACACATCTTTTTTGCAAAAACCTTTTT  
 CTCCAAAACAAGGATTTTCTCCAAAATTGTCCGCACGGCCTAATATGCTCTCTGCAAGCTGAATGAGGGAGCT  
 GAATTGCCTCTTGGAACCCCTCCAAATCTTACACAATTCCGGGTGTAAATCTAATCTGATAAATGAGGATCA  
 ATGAGGAGCCTCTAAATGCCGCTGTTCTGAACTTCCAGTCCCTTCCCTATATGAGACACTAGGGTGGTATATA  
 TTACACAAAACAAGTAACAATAATGAATATCTTAGACCACAACCATGTTATTTGTTGATCGGGTTGGATCAGA  
 ATGTATTGTAAAATGTGGATAATTTGGAACTAGTTAAGGAAGCTCCGAATCTGATGCATGACCAGATGATCT  
 CCTTGTCTTGGGCTGTTTATAATCATTAGCTGACTTTCGGAATTCTGCCTTATAGTGCCTATTGTGGAGGTCT  
 TACCGACCGTCCCCTTGGTGTTCCTGGAACAATGATCTCATGATGATGTTTGAGACAATGAAAAACAATATGG  
 AAATTGCATAATTGGAATCGTTCTCCTTTTCTTTGTAGCTTGCACTAATAGTTGAGGATAAGGGAAGTGAAGA  
 TGCCGGTAGACTAATCTACAATCATTGCACAAGGTATCGCATGCATCAATTTGTAGGTTCTCTTGGAATCATT  
 TTGTTCTGGCAATACTGTGTTACTGAAGCTCATAGATACATAACCTAACTAGATGCTGTGGCTGCTCATATTT  
 ATGGTATTGCTAAGAACCCTAACATTATCTATGTAAAGGATCAAAGTTGATGTGATTTTAACTTTAAGATAAG  
 AACTTCTTAACATGATTACTTTACATCTACCAATTAAGTGTTCATAGTCCTCATCCGGTTATAACAAATGAGA  
 ACTTATTTTGTGGATTTTGTG

>TCONS\_00045907

AATCAAAACACCAGAAATTTACAAACATCCTTAAATCACACACAACATGAAAAGATCCAATTTTACACAAC  
 CATGAAACGCAAAGCTATGCTTTCTACAAGCAACAAAGATAATTTAAACCTTAGATGACATGAAATTCTCCG  
 CTTTCATGTACCTGCTTCACTTGCTTTTCATATTCATCTTCTTCGTCGTCCTCTTCTTCTATATCTTCTTCGTTCAA  
 TTCTTCTTCCTCCTCTTTCACCTACCCAGCCAAAACCTCCAGTTGAACGGGAAGCTGGAGCAGGGGTCTTTGCCT  
 CTTCCACAATTTTCATTATCATCTCCGGGCTCTGAAGGGAAAAGGTTGGATTTTCTTTTCTGTAATAAGCAAGC  
 TGTGCTGCTTCTGTTAATTCCTTAGGCAAATTTCTCAAAAACCACGGGTGGGTTTTTATTTCTTTGATTGTAATT  
 CTTCTTGCTGGATTGGCAACAAATATGCGAGAGAGAAGGTGCCTACAGTCCTGTGATATGTGAACATAGTCG  
 GGAATCTTATACTGCACCGACATTATTCGTTGGATAGTTTTCCGGAAGTTCTTTGGATCCTCCTGGTCTTCAAA  
 AGGGTAAGCACCAACCAGCATTACATAAAGTGTCACTCCACATGACCAAACATCGGCCAGCTTGCCGTCATA  
 TTCTCTTCTAGATAGAATTCGGGAGCAATATAAGCGGGAGTTCCAACAGTTGATTTTGGCCTCGAATGTAGC  
 AGAGACGACTTTGAGTATCCAAAATCACAAATCTTCAAGCGTGGTGTGCTGGACTGCCATCCAGTAGAGTATTCT  
 CCAGTTTTAAATCTCGATGGCATATTTGCATGTTGTGACAGTAGCAGACTCCTGAAATAAGCTGCTGGAAGAA  
 ATATCTAGCCTCATCTTCGCTGAACCTTCCGGCATTGCAATGCGCTCAAACAGCTCTCCACCAGCTGCATAT  
 TCCATTACAATAGCAAGATGAGTGGGGGTTAACACCAACTCCTTGAATCGAATTATGTTTGGATGTCTGAAGCG  
 ATTTATGATTTATGATCTCCCTTGCTACATTCTCATCAATCTTGTGTCCCCTCTCAATATATTTTCATAGCCACCA  
 GCTCTTTGGTCTGCTTGTGCCTCATGAGCCTCGCCACTCCAAAATTCCCAGACCCTATTTCTTTACCAGCTCG  
 TAATTCTCCATCTTTTAATCCTTTAGAAAAAACACTTCTCAATATAAATAAAAAACCAGGAAACCAAACTAC  
 ACAACTCCCAAATTGAGTTTCAATTCATGCGTTTCAGTTCAATTATAAATTGGGAAAGTGGGTCCTAAATTTA  
 ACGGTCAAAGGAACAATCTTTGTGGAGGAATTAAGAAGATTCTCACAAAATCCC

>TCONS\_00046065

TTTTTACAACATGGTAGCCTCTAATGGCTCACAGATGATGCATGTTCACTAGGACTTACTATACAAAACAAGC  
 TGCCAAAAATAATAACCAAAAACATGAAGAGCTTCCTACTTTTTTCTAGTCTTTTTTCTCTTATTACTCTTAGG  
 AGAAGATGTGGAGGAAGATGTTTTGAAGCCTGCCCAGTGATTCTCAGCTTTGTCTTTGTTGAATGCCTTCTGTA  
 AATCATCCTTAAGTTGTTTATAATGCATCTTCTTCGATCTTTGTTCTCAGGTGTGCCACTTTCCAGCGGCAAA  
 GGATTTAGCATTTTGTCCAGAATGTCTGAGCAACTAGGGAAAAAACGTCGACCTGTATCCACTGTTTTCTGCA  
 GGGCTTCCAACCGCTCTTGTAGTGCTTTTACCTTTTCAGGTGGAAATTCATTCAAAACAACCCCTGTCAGATCT  
 CCACATAAGTTATTTATTTCTGAAAGGCCAGTAACTCCGAGGTCTGAATCAACATGTGCTATATCCATGGCTA  
 GCTTGGCTTCTATGGGAAACATCATGCGTGCCATTGCCAC

>TCONS\_00046066

GGAGTGCTGAAATGGTTCTAGCTAAAACTAATCCTGACTAACATGCTGAAGATGTGAACATAGAATTTTTATC  
 AGAATTAATAAGGTACCTCGATTTTCTAAGAGCAGCAACATCGCGAGTAATTCATCAGCCACCACGGATGA  
 TGATGTGATATGTTTCCAATCATTGGATTCTTCTCTCTCCTCAAAAACATCAATGCATAATCGGTCTTT  
 ATTAGTTATCTCTCCCTCTTTGGTGTCTCATTATAATCCTTTAGCCGAGTCACCCTCAAACAAATGGATAGTG  
 CTGTAAGTCCATCCAGTGTCGTATCTAAGGCAGATGCTCCTTTGTCAAGTAACTCATTATTATTGATGGTTCC  
 ATACGTCATATTGTAAGTCTAGCACCAATATGAAGGACTGTATATCCTCGGGAGTTACGAAGATTGACATCA  
 GCTATGCCCAGCTTGAGTACCTCATTTACAACCTTAGAGTTACAATAGGCAGCTGCATAATGAAGAGCACAA  
 GCATCATTTAAAGTGACATTAGACTCTCCAGGAGTAACTTCAGCAATTCAATGTCATCGGACTCTAGAGCCT  
 TGAGAATCTTCCTAATTCTCTTCTCGTGTAGGGAACCACCTTCCATTGTGTCTTGTTCATCACTATTTGGGACT  
 TAAGGCGGCGTGCCTTTATATCGGTCAAACCTTTGGAAGGAAGTTCTTTCTCAAGTGTAATAATATCCAAGTCA  
 GATCGTTCCACCTTCTGCACACACAGCGCTCTAAAAGTAGGTCCAGTGAGCAGTGGAAGGCCACTAAAAGTA  
 TAGGAATTACATCATCCACTGTAGCATCATCAACCAGATTGATAAGATGCCGCTGAACAGCCATGACAAGTT  
 CTTGAATTTGGAAAGTGGCAAAAGCATACATGAGTTCTACAGCATAATTAATGGCAGGGCGGCAAGCATCAT

GAGTACAAGTGATATCAACGCAAGTTGAAACTTCCGGAGGAGGAGGCTTAAGCTTTCCAGTAAACAAATAAT  
TTAAGAAGACCATAAATGCTTCATAACCAATTGAGCCACCAGGCAACAAATCCTTCAGTAAATACTTAGGTT  
TTCCTTCTTTCACAGAATTCTCATTGTCCTTAAATTTTTTATGGAAAACTGACTTCGTGCAGCAAGAATACAG  
CGATTAACAACGACAGTGTTTCCGTCAACAACATCTCTGCATCACTATAGTCATATTTCAGCATCAAGCACGA  
GTTTTTCGAGACTACCACTTAGCTTACTCAAGCTCAGCAGATCAAGACATGTCCCTGGTTCGTCTGGCTATA  
GTCCCCGTCTGATTCATAAGAGGATGAAGCAAACTCCAAGATGATGAAAGTTCCTGCTGCTGCTGCTATA

>TCONS\_00046078

TAGATCCTATTATCACTTTAAAACGTCTTGATTCTTTCTTCAAGAATGATTGGAGACTGATTTCAGCGCCTTT  
GAGGAATTCTGCACCTTAAGAAATACTCTTGTCCATTCCGTCTCATTGTCTACGAGAGAGAAGACTTCAT  
TCAGTAACAAACAACTCCCTCTTTGATCTGTACCCCAATCATATTGAAAAGCTGCAGCTTTGCAAGAACAGTT  
ACTCAGACAGGCCCTTTTGCAATCTTCCAACTTTTTCCCCTCAGGCCAAAATATGCTCGAACTTAGTTCATGAC  
TGAACGGAAATGCAAAATATGCGGTATTCTTGAGCTCTACGAGACTATGATACTGTGGAGAATCACAAGA

>TCONS\_00046153

AGGACTCAAAGTTGGAGAAAATATTGTGCCTCCTGGTTTTGATCAAATATTTGAAAGTGATACTGATCTTTTTT  
CTCATGAAGAAGAAGAGATGCAAGGGCTTTGTGAATCTGAAAAGGTAAAAAAGGTGAGGGGAATGAATAG  
GTATAAAAAAGGTGCAGGACTCAGAGTTGGAGAAAATGTTGCGCCTCCTGGTTTTGATCAAATATTTGAAGG  
TGATACT

>TCONS\_00046183

GGCACTTTTCATTCTTCATTTCGAAACTAACAAGTGCCGGGTCAGGGATTTCTGCCTTGTTATCAAAAAGGGAG  
TTGGGTAAAGCAAACCTCTCTCCTTGAGAGGAGCACGGGCTTAGTCAAGTAGAACCGGGTTGCGCTGCTTGATG  
CTCCGATCGAAAACAAATTAGTGGGGCCATGCCGGTACGACTGAATATGCGTTAGAAAGGTCAATCCCTCCC  
CTACGACACAAAAAAAACCGGGCCGAACCTTCTAAACCGCCCGCTTCCATAGAACAAATATCGTGGAACGTA  
GACCTAAGTGGAATATTGGATCCTTGGAACCATCACAAGTACGGCCGACCTATATATATTTGAACGAAAA  
TGCCGTGTCGTCCAGCGGAGCCTAGAAGAAGGTGACTCGCGCAGACAGCTGACTCCTTTTCAATAGAAAAGA  
ATAGCCAAACCAACCCAGCTGGCTGGTCAATCTCAGAGATCTTATCGGCCGGCAAACCGGAGACGGACGAC  
CACGGTCCCGGCCTTACCAGCACCGGAGGTGTACTAATCAATGAACCCACGAAACCAACTTTCTTTTATGAC  
AAAATAAACCAAGCCTAAGCGGTACGACATCTTGTTGATATTGATTGAGGAGTTTGATGGAGTTTAGCTGAC  
TGAATCCATCCATAAACTTAGACCGCGGTAACCTTCGTAACCAAAGCGTCACGACAATATCCAAAGGTGACC  
TTTGATTCTTAAGTAGGGGGCAAGGAGGAGCACGTAGGAATGCCGACCACTACATAAGCCACTAGTGGCTG  
AGAGAAAGCGAACAGC

>TCONS\_00046184

GGCACTTTTCATTCTTCATTTCGAAACTAACAAGTGCCGGGTCAGGGATTTCTGCCTTGTTATCAAAAAGGGAG  
TTGGGTAAAGCAAACCTCTCTCCTTGAGAGGAGCACGGGCTTAGTCAAGTAGAACCGGGTTGCGCTGCTTGATG  
CTCCGATCGAAAACAAATTAGTGGGGCCATGCCGGTACGACTGAATATGCGTTAGAAAGGTCAATCCCTCCC  
CTACGACACAAAAAAAACCGGGCCGAACCTTCTAAACCGCCCGCTTCCATAGAACAAATATCGTGGAACGTA  
GACCTAAGTGGAATATTGGATCCTTGGAACCATCACAAGTACGGCCGACCTATATATATTTGAACGAAAA  
TGCCGTGTCGTCCAGCGGAGCCTAGAAGAAGGTGACTCGCGCAGACAGCTGACTCCTTTTCAATAGAAAAGA  
ATAGCCAAACCAACCCAGCTGGCTGGTCAATCTCAGAGATCTTATCGGCCGGCAAACCGGAGACGGACGAC  
CACGGTCCCGGCCTTACCAGCACCGGAGGTGTACTAATCAATGAACCCACGAAACCAACTTTCTTTTATGAC  
AAAATAAACCAAGCCTAAGCGGTACGACATCTTGTTGATATTGATTGAGGAGTTTGATGGAGTTTAGCTGAC  
TGAATCCATCCATAAACTTAGACCGCGGTAACCTTCGTAACCAAAGCGTCACGACAACATCCAAAGGTGACC  
TTTGATTCTTAAGTAGGGGGGCAAGGAGGAGCACGTAGGAATGCCGACCACTACATAAGCCACTAGTGGCT

GAGAGAAAGCGAGCAGCACCTTGTATAGGTTGGGCGGAGCTTAAAGAAGCAAGCCCCTATCAGAGAAAGCC  
ATTGCGCGCTAGCCTAGCTAGCTAACGTTTTTCAGCTGGCTGTTATGTTAGTTGTAGCGCGCCTTCCCTCCTTCT  
CTCACTTTGGAAAGATTTTTTCAGTATTTTCTTATGATGACCTGGTCGAGAGAGTACGATACATCGGTGTAAAA  
GATTCCTTTTTTCTGTGAGCTTGGTTTACTTGACCGAAGGGTGCAGTAGAACCTGAAGGAGAGGAATAAATA  
CCTGGTCTATAAT

>TCONS\_00046185

GGCACTTTTCATTCTTCATTGAAACTAACAAGTGCCGGGTCAGGGATTTCTGCCTTGTTATCAAAAAGGGAG  
TTGGGTAAAGCAAACCTCTCTCCTTGGAGGAGCACGGGCTTAGTCAAGTAGAACCGGGTTGCGCTGCTTGATG  
CTCCGATCGAAAACAAATTAGTGGGGCCATGCCGGTACGACTGAATATGCGTTAGAAAGGTCAATCCCTCCC  
CTACGACACAAAAAAAACCGGGCCGAACCTTCTAAACCGCCCGCTTCCATAGAACAAATATCGTGGAACGTA  
GACCTAAGTGGTAATATTGGATCCTTGGGAACCATCACAAGTACGGCCGACCTATATATATTTGAACGAAAA  
TGCCGTGTCGTCCAGCGGAGCCTAGAAGAAGGTGACTCGCGCAGACAGCTGACTCCTTTTCAATAGAAAAGA  
ATAGCCAAACCAACCCAGCTGGCTGGTCAATCTCAGAGATCTTATCGGCCGGCAAACCGGAGACGGACGAC  
CACGGTCCCGGCCTTACCAGCACCGGAGGTGTACTAATCAATGAACCCACGAAACCAACTTTCTTTTATGAC  
AAAATAAACCAAGCCTAAGCGGTACGACATCTTGTTGATATTGATTGAGGAGTTTGATGGAGTTTAGCTGAC  
TGAATCCATCCATAAACTTAGACCGCGGTAACTTCGTAACCAAAGCGTCACGACAACATCCAAAGGTGACC  
TTTGATTCTTAAGTAGGGGGGCAAGGAGGAGCACGTAGGAATGCCGACCACTACATAAGCCACTAGTGGCT  
GAGAGAAAGCGAGCAGCACCTTGTATAGGTTGGGCGGAGCTTAAAGAAGCAAGCCCCTATCAGAGAAAGCC  
ATTGCGCGCTAGCCTAGCTAGCTAACGTTTTTCAGCTGGCTGTTATGTTAGTTGTAGCGCGCCTTCCCTCCTTCT  
CTCACTTTGGAAAGATTTTTTCAGTATTTTCTTATGATGACCTGGTCGAGAGAGTACGATACATCGGTGTAAAA  
GATTCCTTTTTTCTGTGAGCTTGGTTTACTTGACCGAAGGGTGCAGTAGAACCTGAAGGAGAGGAATAAATA  
CCTGGTCTATAATTTTGACAAAAGGAGGACCGCTATTGGGAAATATCTTCTTCTCTTGGTCGTCATCAAAGA  
AGTTGACGTCCGGGGCTTCCCTTTTCCCTTTAAATAAAACCGGTGAAGTCCATCCTAAAGTTCAAATCTAC  
ATCCAACACCAGAGGTTTCTGATGAGAACAAATTGTAAGGCGTTGAAAGAAACCTTAAGAAAGATGTCCCT  
CGCTGCAAAACATATTTTCGCTAGATGGCAAGCCCCTCTTTGACTTTGATATAGAACACATAAAGGGGGAGA  
GTCACAGTCTCCCTTATTT

>TCONS\_00046186

CGGGTCAGGGATTTCTGCCTTGTTATCAAAAAGGGAGTTGGGTAAAGCAAACCTCTCTCCTTGGAGGAGCACG  
GGCTTAGTCAAGTAGAACCGGGTTGCGCTGCTTGATGCTCCGATCGAAAACAAATTAGTGGGGCCATGCCGG  
TACGACTGAATATGCGTTAGAAAGGTCAATCCCTCCCCTACGACACAAAAAAAACCGGGCCGAACCTTCTAA  
CCGCCCCGCTTCCATAGAACAAATATCGTGGAACGCTAGACCTAAGTGGTAATATTGGATCCTTGGGAACCATC  
ACAAGTACGGCCGACCTATATATATTTGAACGAAAATGCCGTGTCGTCCAGCGGAGCCTAGAAGAAGGTGAC  
TCGCGCAGACAGCTGACTCCTTTTCAATAGAAAAGAATAGCCAAACCAACCCAGCTGGCTGGTCAATCTCAG  
AGATCTTATCGGCCGGCAAACCGGAGACGGACGACCACGGTCCCGGCCTTACCAGCACCGGAGGTGTACTA  
ATCAATGAACCCACGAAACCAACTTTCTTTTATGACAAAATAAACCAAGCCTAAGCGGTACGACATCTTGT  
TGATATTGATTGAGGAGTTTGATGGAGTTTAGCTGACTGAATCCATCCATAAACTTAGACCGCGGTAACTTC  
GTAACCAAAGCGTCACGACAACATCCAAAGGTGACCTTTGGATTTATAAGTAGGGGGCAAGGAGGAGCACG  
TAGGAATGCCGACCACTACATAAGCCACTAGTGGCTGAGAGAAAGCGAACACG

>TCONS\_00046187

CGGGTCAGGGATTTCTGCCTTGTTATCAAAAAGGGAGTTGGGTAAAGCAAACCTCTCTCCTTGGAGGAGCACG  
GGCTTAGTCAAGTAGAACCGGGTTGCGCTGCTTGATGCTCCGATCGAAAACAAATTAGTGGGGCCATGCCGG  
TACGACTGAATATGCGTTAGAAAGGTCAATCCCTCCCCTACGACACAAAAAAAACCGGGCCGAACCTTCTAA

CCGCCCCGCTTCCATAGAACAATATCGTGGAACGCTAGACCTAAGTGGTAATATTGGATCCTTGGGAACCATC  
 ACAAGTACGGCCGACCTATATATATTTGAACGAAAATGCCGTGTCGTCCAGCGGAGCCTAGAAGAAGGTGAC  
 TCGCGCAGACAGCTGACTCCTTTTCAATAGAAAAGAATAGCCAAACCAACCCAGCTGGCTGGTCAATCTCAG  
 AGATCTTATCGGCCGGCAAACCGGAGACGGACGACCACGGTCCCGGCCTTACCAGCACCGGAGGTGTACTA  
 ATCAATGAACCCACGAAACCAACTTTCTTTTATGACAAAATAAACCAAGCCTAAGCGGTACGACATCTTGT  
 TGATATTGATTGAGGAGTTTGATGGAGTTTAGCTGACTGAATCCATCCATAAACTTAGACCGCGGTAAACCTTC  
 GTAACCAAAGCGTCACGACAACATCCAAAGGTGACCTTTGGATTCTTAAGTAGGGGGGCAAGGAGGAGCAC  
 GTAGGAATGCCGACCACTACATAAGCCACTAGTGGCTGAGAGAAAGCGAGCAGCACCTTGTATAGGTTGGG  
 CGGAGCTTAAAGAAGCAAGCCCCCTATCAGAGAAAGCCATTGCGCGCTAGCCTAGCTAGCTAACGTTTTTCAG  
 CTGGCTGTTATGTTAGTTGTAGCGCGCCTTCCCTCCTTCTCTCACTTTGGAAAGATTTTTTCAGTATTTTCTTATGA  
 TGACCTGGTCGAGAGAGTACGATACATCGGTGTAAAAGATTTCTTTTTTCTGTGAGCTTGGTTTACTTGACCG  
 AAGGGTGCAGTAGAACCTGAAGGAGAGGAATAAATACCTGGTCTATAAT

>TCONS\_00046188

GGGATTTCTGCCTTGTTATCAAAAAGGGAGTTGGGTAAAGCAAACCTCTCTCCTTGGAGGAGCACGGGCTTAGT  
 CAAGTAGAACCGGGTTGCGCTGCTTGATGCTCCGATCGAAAACAAATTAGTGGGGCCATGCCGGTACGACTG  
 AATATGCGTTAGAAAGGTCAATCCCTCCCCTACGACACCAAAAAAACCAGGGCCGAACCTTCTAAACCGCCC  
 GCTTCCATAGAACAATATCGTGGAACGCTAGACCTAAGTGGTCATATTGGATCCTTGGGAACCATCACAAGT  
 ACGGCCGGCCTATATATATTTGAACGAAAATGCCGTGTCGTCCAGCGGAGCCTAGAAGAAGGTGACTCGCGC  
 AGACAGCTGACTCCTTTTCAATAGAAAAGAATAGCCAAACCAACCCAGCTGGCTGGTCAATCTCAGAGATCT  
 TATCGGCCGGCAAACCGGAGACGGACGACCACGGTCCCGGCCTTTACAGCACCGGAGGTGTACTAATCAAT  
 GAACCCATGAAACCAACTTTCTTTTATGACAAAATAAACCAAGCCTAAGCGGTACGACATCTTATTGATATT  
 GATTGAGGAGTTTGATGGAGTTTAGCTGACTGAATCCATCCATAAACTTAGACCGCGGTAAACCTTCGTAACCA  
 AAGCGTCACGACAATATCCAAAGGTGACCTTTGGATTTATAAGTAGGGGGCAAGGAGGAGCACGTAGGAAT  
 GCCGACCACTACATAAGCCACTAGTGGCTGAGAGAAAGCGAACAGC

>TCONS\_00046192

CATTGATTAGTACACCTCCGGTGCTGGTAAGGCCGGGACCGTGGTCTCGTCCGTCTCCGGTTTGCCGGCCGATAA  
 GATCTCTGAGATTGACCAGCCAGCTGGGTTGGTTTGGCTATTCTTTTCTATTGAAAAGGAGTCAGCTGTCTGCG  
 CGAGTCACCTTCTTCTAGGCTCCGCTGGACGACACGGCATTTCGTTCAAATATATATAGGTCGGCCGTACTTG  
 TGATGGTTCCCAAGGATCCAATATTACCACTTAGGTCTACGTTTCCACGATATTGTTCTATGGAAGCGGGCGG  
 TTTAGAAGTTTCGGCCCCGGTTTTTTTTGTGTCGTAGGGGAGGGATTGACCTTTCTAACGCATATTCAGTCGTACC  
 GGCATGGCCCCACTAATTTGTTTTTCGATCGGAGCATCAAGCAGCGCAACCCGGTTCTACTTGACTAAGCCCGT  
 GCTCCTCCAAGGAGAGAGTTTGCTTTACCCAACCTCCCTTTTTGATAACAAGGCAGAAATCCCTGACCCGGCAC  
 TTGTTAGTTTCGAATGAAGAATGAAAAG

>TCONS\_00046193

GTTTATTTTGTATATAAAGAAAGTTGGTTTCATGGGTTTATTGATTAGTACACCTCCGGTGCTGTAAAGGCCGG  
 GACCGTGGTCTCGTCCGTCTCCGGTTTGCCGGCCGATAAGATCTCTGAGATTGACCAGCCAGCTGGGTTGGTTTG  
 GCTATTCTTTTCTATTGAAAAGGAGTCAGCTGTCTGCGCGAGTCACCTTCTTCTAGGCTCCGCTGGACGACACG  
 GCATTTTCGTTCAAATATATATAGGCCGGCCGTACTTGTGATGGTTCCCAAGGATCCAATATGACCACTTAGG  
 TCTACGTTTCCACGATATTGTTCTATGGAAGCGGGCGGTTTAGAAGTTTCGGCCCCGGTTTTTTTTGTGTCGTAGG  
 GGAGGGATTGACCTTTCTAACGCATATTCAGTCGTACCGGCATGGCCCCACTAATTTGTTTTTCGATCGGAGCA  
 TCAAGCAGCGCAACCCGGTTCTACTTGACTAAGCCCGTGCTCCTCCAAGGAGAGAGTTTGCTTTACCCAACCTC  
 CTTTTTGTATAACAAGGCAGAAATCCCTGACCCGGCACTTGTTAGTTTCGAATGAAGAATGAAAAG

>TCONS\_00046194

GTTTATTTTGTCTATAAAAGAAAGTTGGTTTCATGGGTTTCATTGATTAGTACACCTCCGGTGCTGTAAAGGCCGG  
GACCGTGGTTCGTCCGTCTCCGGTTTGCCGGCCGATAAGATCTCTGAGATTGACCAGCCAGCTGGGTTGGTTTG  
GCTATTCTTTTCTATTGAAAAGGAGTCAGCTGTCTGCGCGAGTCACCTTCTTCTAGGCTCCGCTGGACGACACG  
GCATTTTCGTTCAAATATATATAGGTCGGCCGTAAGTTGTGATGGTTCCCAAGGATCCAATATTACCACTTAGGT  
CTACGTTTCCACGATATTGTTCTATGGAAGCGGGCGGTTTAGAAGTTTCGGCCCCGGTTTTTTTTTGTGTCGTAGGG  
GAGGGATTGACCTTTCTAACGCATATTAGTCGTACCGGCATGGCCCCACTAATTTGTTTTCGATCGGAGCAT  
CAAGCAGCGCAACCCGGTTCTACTTGACTAAGCCCGTGCTCCTCCAAGGAGAGAGTTTGCTTTACCCAACCTCC  
CTTTTTGATAACAAGGCAGAAATCCCTGACCCGGCACTTGTTAGTTTCGAATGAAGAATGAAAAG

>TCONS\_00046195

GTCGTGACGCTTTGGTTACGAAGGTTACCGCGGTCTAAGTTTATGGATGGATTGAGTCAGCTAAACTCCATCA  
AACTCCTCAATCAATATCAACAAGATGTCGTGACCGCTTAGGCTTGGTTTATTTTGTCTATAAAAGAAAGTTGG  
TTTCGTGGGTTTCATTGATTAGTACACCTCCGGTGCTGGTAAGGCCGGGACCGTGGTTCGTCCGTCTCCGGTTTG  
CGGCCGATAAGATCTCTGAGATTGACCAGCCAGCTGGGTTGGTTTGGCTATTCTTTTCTATTGAAAAGGAGTC  
AGCTGTCTGCGCGAGTCACCTTCTTCTAGGCTCCGCTGGACGACACGGCATTTTCGTTCAAATATATATAGGTC  
GGCCGTAAGTTGTGATGGTTCCCAAGGATCCAATATTACCACTTAGGTCTACGTTTCCACGATATTGTTCTATGG  
AAGCGGGCGGTTTAGAAGTTTCGGCCCCGGTTTTTTTTTGTGTCGTAGGGGAGGGATTGACCTTTCTAACGCATATT  
CAGTCGTACCGGCATGGCCCCACTAATTTGTTTTCGATCGGAGCATCAAGCAGCGCAACCCGGTTCTACTTGA  
CTAAGCCCGTGCTCCTCCAAGGAGAGAGTTTGCTTTACCCAACCTCCCTTTTTGATAACAAGGCAGAAATCCCT  
GACCCGGCACTTGTTAGTTTCGAATGAAGAATGAAAAG

>TCONS\_00046196

CCAAAGGTCACCTTTGGATATTGTCGTGACGCTTTGGTTACGAAGGTTACCGCGGTCTAAGTTTATGGATGGA  
TTCAGTCAGCTAAACTCCATCAAACTCCTCAATCAATATCAATAAGATGTCGTGACCGCTTAGGCTTGGTTTA  
TTTTGTCTATAAAAGAAAGTTGGTTTCATGGGTTTCATTGATTAGTACACCTCCGGTGCTGTAAAGGCCGGGACC  
GTGGTTCGTCCGTCTCCGGTTTGCCGGCCGATAAGATCTCTGAGATTGACCAGCCAGCTGGGTTGGTTTGGCTA  
TTCTTTTCTATTGAAAAGGAGTCAGCTGTCTGCGCGAGTCACCTTCTTCTAGGCTCCGCTGGACGACACGGCAT  
TTTCGTTCAAATATATATAGGCCGGCCGTAAGTTGTGATGGTTCCCAAGGATCCAATATGACCACTTAGGTCTA  
CGTTGCCACGATATTGTTCTATGGAAGCGGGCGGTTTAGAAGTTTCGGCCCCGGTTTTTTTTTGGTGTCTAGGGGA  
GGGATTGACCTTTCTAACGCATATTAGTCGTACCGGCATGGCCCCACTAATTTGTTTTCGATCGGAGCATCA  
AGCAGCGCAACCCGGTTCTACTTGACTAAGCCCGTGCTCCTCCAAGGAGAGAGTTTGCTTTACCCAACCTCCCT  
TTTTGATAACAAGGCAGAAATCCCTGACCCGGCACTTGTTAGTTTCGAATGAAGAATGAAAAG

>TCONS\_00046197

GTCAACTTCTTTGATGACGACCAAGAGGAGGAAGATATTTCCCAATAGCGGTCTCCTTTTGTAAAAATTATA  
GACCAGGTATTTATTCCTCTCCTTCAGGTTCTACTGCACCCTTCGGTCAAGTAAACCAAGCTCACAGAAAAA  
GGAAATCTTTTACACCGATGTATCGTACTCTCTCGACCAGGTCATCATAAGAAAATACTGAAAAATCTTTCCA  
AAGTGAGAGAAGGAGGGAAGGCGCGCTACAATAACATAACAGCCAGCTGAAAAACGTTAGCTAGCTAGG  
CTAGCGCGCAATGGCTTTCTCTGATAGGGGCTTGCTTCTTTAAGTCCGCCCAACCTATACAAGGTGCTGCTCG  
CTTTCTCTCAGCCACTAGTGCTTATGTAGTGCTCGGCATTCTACGTGCTCCTCCTTGCCCCCTACTTAAGA  
ATCCAAAGGTCACCTTTGGATGTTGTCTGACGCTTTGGTTACGAAGGTTACCGCGGTCTAAGTTTATGGATG  
GATTGAGTCAGCTAAACTCCATCAAACTCCTCAATCAATATCAACAAGATGTCGTGACCGCTTAGGCTTGGTT  
TATTTTGTCTATAAAAGAAAGTTGGTTTCGTGGGTTTCATTGATTAGTACACCTCCGGTGCTGGTAAGGCCGGGA  
CCGTGGTTCGTCCGTCTCCGGTTTGCCGGCCGATAAGATCTCTGAGATTGACCAGCCAGCTGGGTTGGTTTGGC

TATTCTTTTCTATTGAAAAGGAGTCAGCTGTCTGCGCGAGTCACCTTCTTCTAGGCTCCGCTGGACGACACGGC  
ATTTTCGTTCAAATATATATAGGTCGGCCGTA CTGTGATGGTTCCCAAGGATCCAATATTACCACTTAGGTCT  
ACGTTTCCACGATATTGTTCTATGGAAGCGGGCGGTTTAGAAGTTTCGGCCCGGTTTTTTTTGTGTCTAGGGGA  
GGGATTGACCTTTCTAACGCATATTCAGTCGTACCGGCATGGCCCCACTAATTTGTTTTCGATCGGAGCATCA  
AGCAGCGCAACCCGGTTCTACTTGACTAAGCCCGTGCTCCTCCAAGGAGAGAGTTTGCTTTACCCAACCTCCCT  
TTTTGATAACAAGGCAGAAATCCCTGACCCGGCACTTGTTAGTTTCGAATGAAGAATGAAAAG

>TCONS\_00046198

AAGGGAGACTGTGACTCTCCCCCTTTATGTGTTCTATATCAAAGTCAAAGAGGGGCTTGCCATCTAGCGAAAA  
TATGTTTTGCAGCGAGGGACATCTTTCTTAAGGGTTTCTTTCAACGCCTTACAATTTGTTCTCATCAGGAACCT  
CTGGTGTGGATGTAGATTTTGAACCTTAGGATGGACTTCACCGGTTTTATTTTAAAGGGAAAGAGGAAGCCC  
CGGACGTCAACTTCTTTGATGACGACCAAGAGGAAGAAGATATTTCCCAATAGCGGTCCTCCTTTTGTCAAAA  
TTATAGACCAGGTATTTATTCCTCTCCTTCAGGTTCTACTGCACCCTTCGGTCAAGTAAACCAAGCTCACAGAA  
AAAAGGAAATCTTTTACACCGATGTATCGTACTCTCTCGACCAGGTCATCATAAGAAAATACTGAAAAATCTT  
TCCAAAGTGAGAGAAGGAGGGAAGGCGCGCTACAATAACATAACAGCCAGCTGAAAAACGTTAGCTAGCT  
AGGCTAGCGCGCAATGGCTTTCTCTGATAGGGGCTTGCTTCTTTAAGCTCCGCCCAACCTATACAAGGTGCTG  
CTCGCTTTCTCTCAGCCACTAGTGGCTTATGTAGTGGTCGGCATTCTACGTGCTCCTCCTTGCCCCCTACTTA  
AGAATCCAAAGGTCACCTTTGGATGTTGTCGTGACGCTTTGGTTACGAAGGTTACCGCGGTCTAAGTTTATGG  
ATGGATTCAGTCAGCTAAACTCCATCAAACCTCCTCAATCAATATCAACAAGATGTCGTGACCGCTTAGGCTTG  
GTTTATTTTGTCAAAAAGAAAGTTGGTTTCGTGGGTTTCATTGATTAGTACACCTCCGGTGCTGGTAAGGCCGG  
GACCGTGGTTCGTCCGTCTCCGGTTTGCCGGCCGATAAGATCTCTGAGATTGACCAGCCAGCTGGGTGGTTTG  
GCTATTCTTTTCTATTGAAAAGGAGTCAGCTGTCTGCGCGAGTCACCTTCTTCTAGGCTCCGCTGGACGACACG  
GCATTTTCGTTCAAATATATATAGGTCGGCCGTA CTGTGATGGTTCCCAAGGATCCAATATTACCACTTAGGT  
CTACGTTTCCACGATATTGTTCTATGGAAGCGGGCGGTTTAGAAGTTTCGGCCCGGTTTTTTTTGTGTCTAGGG  
GAGGGATTGACCTTTCTAACGCATATTCAGTCGTACCGGCATGGCCCCACTAATTTGTTTTCGATCGGAGCAT  
CAAGCAGCGCAACCCGGTTCTACTTGACTAAGCCCGTGCTCCTCCAAGGAGAGAGTTTGCTTTACCCAACCTCC  
CTTTTGATAACAAGGCAGAAATCCCTGACCCGGCACTTGTTAGTTTCGAATGAAGAATGAAAAG

>TCONS\_00046260

ATGGGCGAACGACGGGAATTGAACCCGCGCATGGTGGATTACAATCCACTGCGAACGAGAGTTGTTGAAA  
CTAGCATATTGGAAGATCAATCGGCCAAAATAACCATGAGCGGCTACGATGTTATAAGTTTCTTCCTCTTGAC  
CGAATCTGTAACTTCATTAGCAGATTCATTTTCTGTGGTTTCCTGATCAAAGTTACCAAGGAACC  
ATGCATAGCACTGAATAGGGAGCCGCCGAATACACCAGCTACGCCTAACATGTGAAATGGGTGCATAAGGA  
TGTTGTGCTCAGCCTGGAATACAATCATGAAATTGAAAGTACCAGAGATTCCTAGAGGCATACCATCAGAAA  
AACTTCCTTGACCAATTGGGTAGATCAAGAAAAGTGCAGTAGCAGCTGCAACAGGAGCTGAATATGCAACA  
GCAATCCAAGGTGTCATACCCAGACGGAACTAAGCTCCCACTCACGACCCATGTAACAAGCTACGCCAAG  
TAAGAAGTGTAGAACAATTAGTTCATAAGGACCACCGTTGTATAACCATTCATCAACGGACGCCGCTTCCCA  
GATTGGGTAAAAATGTAAACCTATAGCTGCAGAAGTAGGAATAATGGCACCGGAAATAATATTGTTTCCGTA  
AAGTAGAGACCCTGAAACAGGTTACGAATACCATCAATGTCTACTGGAGGAGCAGCAATGAAGGCAATAA  
TAAATACAGAGGTTGCCGTCAATAAGGTAGGA

>TCONS\_00046383

GAACAACAATGACCTCCAATATCCAGAACCCACGCCTGATTCATCCACAAGATTCCCTTATACCTACTACTGT  
ATCAACAACACAACCTTTCTTGCTAAATTCTACTATTTCTTCTTAATTAGTTTACTATCAGATTGGTTATTTCCA  
CCACCAGCAGCCTGTGCCGCTTTCCTTGCTGCTTTTTCTTGAAGTGCCTTCGCGTCTCTTTCTCGTCTTTGTTTCA

GGGTTAATCCATCACCTTTGGGCTGTTTGGGTTTGCTACCTGCCCTGGCTTGTGCCCTTTCACGATCTCTATCTC  
TCTGATTTCCGCGTTAGCTTG

>TCONS\_00046409

CAGTTGCATTCAACATTTTTGTGAAAATAAGATGATCCCGAGAAATGTTACATTCAATAACTTGAAACTCATT  
ATCAGCATATGCAGAAGGATTCTGTCTATGCCCACCAACTGACATCATATGGGATCTTACAAGTCATGATAGC  
GAACATACATTTCTAAGAGAAACAGACTATCCTGAGGCTAATCAGTCACGCTCACTGATGGCTGTTAAGTGCT  
CATCAATTTCTCTCGGTAGTTAACAACCTCTGAAGACGGGATCTTCTTTCTTCAACAACCAACCTCAATTTCACTG  
GCCTTAAAATCCTCTTGCAGGACAGATTGAAGAGCAGAAATTGCAGTCTGAACAGTTTCTCATAGGAGAAA  
GCAGGGTCATTTTTTCATTTTCTTCTCCAAAAAATTAATTGCCTCTTGTCTTTAGATCCAGCACTTGTAGCCTTA  
TGACCAAAAAAATGACCAGCAGGGTCACACTTGAAGAGCTGGGGTCCTTTCTCCTCATCAATGCCCAAAATC  
ATAGCAACTACTCCAAGGGGTCTCATATAGGCATGCTGTGTGTAAACCTGAGACTTGTCTGCAATCCATTTAG  
ACAGTACATCCACTGGCATTTCATATCCATATTTAAAACGAAACTCAGCAGCTTCATTTGAGCTTGTGTAAC  
CAAGGTTCTCGCATCAGCTGTATGCCAGTAGCCAATAGTCCAAGATACTTGGTAATCGGGAACAAGTGGA  
TAACTGGTCTGATCCAATAGCTTGTGAGGGACTTTCTTCTGAGTAACAACACAAACGGAGTCCTTTCCACGG  
ACGCCAATAGAGGTAATTCCGGCCGCTTCACAGCCTTAAACGCATATTGACTTGAAAGAGACGACCTTCG  
GGAGAGAAGATCGTAATGTGACGATCGTAGCCGCTCCACTCCCTCTACTCATTTTTAGATTGTTAGATTACT  
TTTTTGTTTTTCAGTTCGATCTGATTACTTGATTCAGACTGGTTAGGGTTTTTA

>TCONS\_00046498

GGGATCTCATAGTGTTCAGATATTCTGGTAAGGAAATGCACAAAAATTGATGGTGCAACATGTGTAGTTTGT  
TAAAACGAAGTGCTTTTGTATCGTGAATGTTTGCTAGATTATTCTCATGTAGAGAACATAAGATATCTTCCA  
TTCTCTTTGTCAGTTCAAACCTACACCTTGAGAGTTTCAGTCAACTATCAAGAGCTGTGGGCTGCTAGGATATAT  
CTTAAATAACCTTGTTAAGTTTCTTCTGTTGTTTCAGGGATTCTTGATACTATAGGGAGAGTTGATTATCAGCT  
TTCTCATTGAATTCAACTCTAAGTTGGTTGCAGACATAAATCCTGGTGTGAAAGCTTTAATGCTGTAAGTTGCT  
GAAAAAGTTAGAAAATCATTATGCTACAACTTTACAGCACATTTACGGAATACCAGATGGGAAAGAGCTGG  
GTCCAAGCTTTGCTAAACTGAGTTTGGTTTTGGAAGCCCAATCAGCTGTCCTATTGGACATGACGGCAGGTAT  
GGCGGAGTGTATCCAACATATAGACTCAGTTTCGAAAGTTCAAATTAGCTTGGATCATCTCTGCAACCCGAA  
GCTTGATATTGAACTTGAAAGTTGAGACCTATCTATTTCTCAAGATCTGTTTGATGATTTAGAAGGTCATAGC  
TTATACCGACTTGGAATCCTGTTGACCTGACTTGTTACTGCTGAGGATTGATATGAAGGGTTGTAAATGGAG  
ATCATCTCAATCAACAGAGTTTCAGCCGGAGTTATCTTCCACTGAACTCCAAGATGAATCTTCGGACTCGTA  
CTACAGGTGGCATCAATCATAACTTATGAACACCTAAAAACACTTTTTAATTGGGGAATCAATTAAATCTCT  
GATTGGTTCTACAATGTGTTGTTGCTGCAGGGGAAGAAAAACTTTGGTTTTGTCATGTTTGTGGCCATATGTGG  
CATTACGCAACTAATGTCATCCGTTCACTCTCAATCAGTTGACACCCTAAAGCAAAGAGGGAATTACTTAGAT  
TAGCAGTTTTTCAGTTCAGCTGCATCTAGATGGGGGAAAACAATCAAGAAACCTTTCAGGTAAACGGAGATG  
CTCGAAATCTGGAAGCTTAGAAACAGGTGGTTAGATCTGTTTTTGTTCGAATGAGTATATCAACGAGGCTGTC  
GTGCAGATTGCAGTAGTGAAGCAAATGGGGGCATCAAGATTTGGGATTGAGAAACACCT

>TCONS\_00046537

TTCTTGCCGTGTGGAACATGGATTAGCATTATGTCATTCTTACAAGTGATGACCCACCCAGGATTTCTATGT  
ACGGATTTAGAGATCAAATATAATATGTTTCTTTCCATTCTTCGTGAGCCACTTATTTCTCCGAAACAAGAGAT  
TAAAGTCATCTTCTCCTTTTTCCCAAGAAGTCGACGGCGTTACACCATTGGGATACTTCGAATAAACTTGAG  
TACATATAGGATACACCGGTGCTAAAACCTTTTCTCAAGATATCTTCCAAACTGTTGGGGTCGTTGCTTCGGAT  
CTTGTTCTCCCGGTGTGAAACCAGTTGGTTCCGTAGTTTGAATTTCTGCTGATCCCAAGTACTCCATCTCCAT



CATTGCATATAGGAATATAGAAAGTAAAGAGGAAAAGGCATGACCAGAAGAATTGTGTGAAATAAGTAAAT  
TTATCCAG

>TCONS\_00046538

ATTTCTATGTACGGATTTAGAGATCAAATATAATATGTTTCTTTCCATTCTTCGTGAGCCACTTATTTCTCCGAA  
ACAAGAGATTAAAGTCATCTTCCTCCGATGCTTCCTTGGCCGTGTGGAACATGGATTAGCATTATGTCATTCTT  
ACAAGTGATGGCCACCCAGGATTGCTATGTACGGACTTAGAGATCAAATATAATATGTTTCTTTCCATTCTT  
CGTGAGCCACTTATTTCTCCGAAACAAGAGATTAAAGTCATCTTCCTCTTTTCCCAAGAAGTCGACGGCGT  
TACACCATTGGGATACTTCGAATAAACTTGAGTACATATAGGATACACCGGTGCTAAAACCTTTTCTCAAGAT  
ATCTTCCAACTGTTGGGGTCGTTGCTTCGGATCTTGTTCTCCCGGTGTGAAACCAGTTGGTTCCGTAGTTTTAG  
AATTCTGCTGATCCCAAGTACTCCATCTCCATCATTGCATATAGGAATATAGAAAGTAAAGAGGAAAAGGCA  
TGACCAGAAGAATTGTGTGAAATAAGTAAATTTATCCAG

>TCONS\_00046567

TTTTTATGTGAAATCAAGGAGCAGCAGGTTAGACTTTGACACTTTCCCGAAGAGAGCTCAAAGCAATAAGAT  
GAAAGATGGGATGAGATGCTAGCCTTAGCGCAGAAGATAAATCATTGAACCTTAGGCCACTACCGAGCAGC  
AATGTAGGATCATAACTGCCTGTACTGCCGAGATGATCCCTACTTGAAAAGGCGGAGACAGATTGTTGCGAC  
AAATCGAGTTTCAAAGGCCATTTATCAATCACATTTTCAGGCACACCAGTCAAAGAGCCATCGGACCCATG  
AGAGTCCCATCTTTGACTAATATACACGGG

>TCONS\_00046666

CACACCCTTAATGTTGAAGTAATGAGCTTGAAGAAGTGCAGTTTGTGGCATGCTAAAGGTAATGTTGTTGAGA  
GAAGCTGTAAACCGAGTTCCATTTAGACAGGTGGGACAAGGATTTATTCCTAGGCCTACTGTAAATAAGAGG  
TGTCGATCAACATTTAGGGGAACGTTTGCTGGATATTTAGGGGTATTTAGGCTTTTGAGTTTAGAGTTATAGGT  
CAAAGCAAAGTTTGTGTCATTTTGT

>TCONS\_00046667

TGCCCACTCACCTAGTACAAGTACTTCTTCCTATCTGGTTGAGGGAAAGGGAAGGGAGTTCCTTGTTGTGG  
CATGATAACTATAGCACCATAGACTGTTGCCCTTAGCCAAAGAATGTGTGCATGCCACCATAAGGTTCTCTT  
TGTCCTGTTATATTGAAGTCATAAACATAGCTATTTCTGTCTGAATAGGGCATTGTGTTATGTAAGCTGGCCC  
GTCTGCCCAACCATTGCGATATTGTTTCAATCCATGCCAGTGAATGGACAAGTTATACTGTGCAAAGTTAGTA  
ACATTGATTTGAACTCTATCTCCTTCTCTAGCATATATAGTTG

>TCONS\_00046766

GCAGTAGCAAGATGGATCAACAATCTTCTTATGCGCAGGATAAGACTCAACATGGTACCCTGAAAGCGCTTC  
CAATCATCTTATAATGTGAAGCTTAAGCACAGCATGCCATTAGAACTCATCTTCAAATGTCTCAACAATTAAC  
CTCAAATCTCAAAGGCCAAGCTGGTTGCTGATAAACTACAGTATCCTGTCCACAAAGGTCTTCAATACAGAG  
GTACATAGTGGATGAACTAAAATACCTTTTTATTCTTGTAGCCCATACATCCACTCTTCTATTAGTTCAAGGTT  
AGGCTTATAACCAACATCCTTCATATTGATGGTTAAATGACCCAACATATCATATATCATGTGCTCTGAGGA  
TGCTTCCTATCTCTAGACACAAAACAGCTTGGATAGCCAGAAGTACCAATCCAACATCAACCTCCTTTG  
ACAATCCCATTTTGGCATTCTCTTCTTACGTTATCGACAGACTGCCAGTTTCCTTCCTCTGCATATATATTTG  
AAAGCAGAACATGATAACCAGATATTCTGTCACTCCCCTCTAATTCAAGCAGCTTACTGGAAACAATTTTCCC  
CAATTCAAATTTCTATGGACTCTGCAGGCAGCAAGGAGTGATCCCCATATTCCCAAGACATTACCTCTTCG  
CCCAACTGTTTAGCAAAATTATGAGCTTCATCCAACCGTCCAACCTCTTCTAACATGTCAACCACACAAGCAT  
AGTGCTCTGCTGAGGGCTGAATCCCGTATTCTTCGTCCATCAGCTCAAATATTTGAAGACCTTCATCAACCAA  
TCCAGTGATGCTGCAAGCAGACAAGATTGCTACAAAGGTAACAGCATCTGGTTTTAAACCATTCTCCCGCAA  
AGAGTAGAACAGCGCAAGAGCTTTTTTACCCATCCCATGCTGGCCATATCCCAAAATCATATTCGTGTATGTC

ACAGAGTTCTTCTCAGGGGATTTTAGAAAAATGCTTTCAGCATAATGAATGCTGCCAGATTTTGAATACATGT  
 CTACCAAAGCCGAGACAACATAAACATTGTTCTCAAACAAATTGCGAATTGCAAAACAATGTAGCTGATTGC  
 CTATTGCTATACTTCCTGACTGACTGCATGCTGGGAGAAGTGATGCTAAGGTAACAGCATTTCGGTTTCACATT  
 CTGCTCCAGCATCTCCTTGAAGACCACAAAGGATTGTTCAATTAATCCATTTTGAGTGTTTCCAGCAATCATA  
 GCATTCCATGTGGCCTGATCTTTATAATTTGTGCAGTTTGACTGAAATATTGCTTGTGCTTCTCTAATCATGCTA  
 GATTTGGCATAACATGTCTATCAGATAACTTTCCATCCCTTCAAATTGAATATTGTGCCTCAGAAGATAAGCAT  
 GGGTCTGTTTACCTATTTTCTGTCCCTGAGATTTGATGCCGCAGAAAGCAGAATAGTAATTGTTATAGCATCA  
 ATTGCAACCCCCAGCTTTTGCATCTCATATACTAGCATCAAAGCCTCATCGTCAAGTCCATTTTGTACCAAAG  
 CAGACACCATGGTGTTCACGACACTATATCTCTTTCCTCCATTCCACTAAAAACTTTAAAGGAATCACCAAC  
 ACGGTTACACCTAGAATATGTGGCAACCATAGCATTTAGCAAATAACCTGTGAATCCATGCATTTCTTTATC  
 AGACATGCATGTAGCTGTTGAGCAAACCTCAAATGCTGCAACTGTGAAGTTGCCGTAAGAGCGGATACAAAT  
 GTCACATCATCAATAGGAACACCATCCTCTGCTTCTACAGCTCCAAGAAAGAGATCAAGTGCTTTAAAAGGA  
 AAATTGTTCTGAATGTACCCGCTAATCATAGAGTTCCAAATCTCTGTATTTCTTTCAAACTATTCTCAAATAT  
 TCTGCTCGCCAAATCAATGCAACCAAGATCAGCATACATAACAATCGCAGCACTAACAACAAACAAGTCATT  
 TACGTATTGATTACCCAATTTCAACAGCGAACCATAAAGAACATCAGCGACTCTAACATCCCCTATTTTCAGAG  
 ACAGCTGGAAAAATATTAACAAAACCTAACAAACAGTCGGCTTAATGCCTATTCTCATCATCATAACAAAACAC  
 CTAAGTCTTCTGAAAACCTCTTCTTTTAAACATACCACGAAAATATGGTATTCCAAGCAACAACATTTCTTTT  
 ACGCATAGTTCTAAACACTCTTTCAACTAAATCACAATGAGAACCATTTTTCGAATCCGAGACAAGTGGAGTA  
 CATATTCAACAAAGAATTACACACAATCCTACTAGGGTGAATACCCGAGCGAAGAATGTGGCAGTGCACGG  
 CTTTACCTACAAGAATCTGTTTCGTCTCAGCGCAAGCTTTGAGAACAGAAGAATAAGTATACTGATCACATGT  
 CGATGAACCCACATGTTTCAATCGGGAATAGAATGAAATGGCTTCATGGGACATGTTGTTACAGATAAAACC  
 AATGATAATTGTGTTCCATAGGACAGTACTCGGTTGAGGAATTGTGTGCAACAGTTGGCGTGCGAGATGGGG  
 TTGGCCTTGCTGCAAAGTTTCGCCTAACCGTAACGAATTGTTCTGGGTTTGGACTCGTTTTTTACAGTGCATT  
 GTTGTTCGTGCGTGAGAGTGTTGCCGTGGAGTAGAGAACAGAAGTTTGGGTGATGGGTAAAGGTTAAAGAAG  
 CTGGGGATTGGGAGAAAGTTGAGGACGAGAAAGGAAGAGGAAGAGCTGAGGAGGACATTGTCAAACGCAT  
 TCGGACCTCAAACTAACAGAACTCCCAAGCTCAGGAGCTCTTCGAGGATAAACAGGTAGTTATAATTTCAA  
 CTGCTACTTATCTTTATGTGAAATATCAAACCGCACCTACATTTTAC

>TCONS\_00046812

TCATGATACGGCCAGGTATACTTGAGATTAGACGAACCAAACCCGGATTTGTTTGCATGGAACAAACCGGAT  
 TTGATAATCAACTATACGTCCGTAATTTTTGGTAGTAATCCGATTACAGCTTCGTAATTAATAGTATCCAAAAA  
 CAATTCTGAATTCTGAAGTAGAAGAGAGAAGCTTAATCATCGTGAAGTAGCTATTTGCTGAAAAACGCTAAT  
 AGAAATCAATTATCATCCTTTAATCTCTTCACCGTGGTCACACATTCAGTATTTTCAACACCGGAGTATCATTT  
 GCGTTTTGATTAAACATCTGGAGGCGTGTAATAATGGATTGCTGACTAGCTGCAAGGTAATTACTTAGTTTTTA  
 TAGAATGTAATTAGAATTTTTCTTTCTATTACAGTTGACACTTATTTTACTCGTACTAGTTATACTCGGATAAGT  
 AACAATACAAAAAAGTTATACTTGATAAGCGTGAGATTTAGAGAATTTCTAGTTTCTAACTTTCCG

>TCONS\_00046859

CTTTCTAGTCTTTTCATCAACATCATGAGGTAAACGGAGCCAAGCTGAGTATACTAATGACTCATAAACTGTA  
 ACATAAGGTGAATGGATATCATTCTGCTCACAGTATCCAGATATACGTGCAAATGTTTCTTGCTTCTTAGGAT  
 AGCCAGAGATCTTGATACTACCCTCAATATATCCTCCTGTTTTCTTCCGGCCAATACATCCATCAATGTTGTT  
 TTTCCAGCCCCACTGACTCCCATTAAGCTGTCAAACACCTGGCCTGAAAGCTCCACTTACTCCCTTCAGAA  
 GTACCAATCTATCTTCAGTGGCGCCCTGATCTTTCATTTCTGAGGCATGTCGACAGAGTATATAACTTCATCA

AAGGTGATGGAATGCGGTTCAAATGGAAGAACCATTCCCTTTTTCTTACTCTGACCCTCACTATTGGACTGTTC  
TTTCTCATTGCTAGTTGTTTTGGCATCTTCA

>TCONS\_00047002

CTCATACACATACAAAGTTCTTGACTGCGAAAGGCACCAACCTGGGAGAGTTGTGGAAGGAAATTCGGCTTT  
TCCAATGTGCCTGTCCCAATCTCACCAAAGGTAAAAGCAATTATAACAGCAGCCAGCAGATTGGTGAAAGTA  
TAATCAAGGTAAGTGTGTTGAGGAAATCTCCCTCTTCTTTCAAGTAAAGTTAGTAAAGCTGGCCATGTCCCTA  
AGAAGAACAAAGACAATAACATGCAAACAATAGCCCCCTCTTTGCTCTCCACCACATACATCTTCAAACCAC  
TGGATAAAACCCTTTCCGGTGAAAGTGCTATCAAATTGGAAATGCTCCAAAAATCCTACTGTTTGAGACCCCA  
CAAAAAAG

>TCONS\_00047050

TTCATTCTGATGTTTTAGTAGTTGCAGGTCCAAATGTAAATAAAACAGGCAACATAACCATTAGCCAAATGCG  
ATCAAAATACGTCCCCTAAAATAATTTACGTTGCAAGTTCTGCCGAGCTAAGAAATTTTCAGTTTGAACCTT  
AACTACACACAAAATGCCACAGAATTGCGGAATTTATATGTAGCAAACACTGAGGAATCTAAACGATTTTCG  
CACATACATTAGAACATACAATAATATCTTTGCATTTACATCACTTGGTGTGAGCTACGACAAAGATTTAGCG  
AGAAGAAATCATGGTATTTATACTTTTAGAGTTCAAGGACAAATGTATCATTTTCATAGATGATCTATTTCC

>TCONS\_00047106

AGTCATCACTCATCTTTGCACTACTTCTTTGCACCACTGGAGGACTCAGGCTGTGGTTTTATTATATTTAATTGA  
CCACCATCCTTAGTAGCAAATGTAGCTGCTTTTACTTCATTGCAGTGATTTATAAACTTTGTCAACTCCCGATC  
GACATCCATCTGCTTTGTATTCTTTGACGGCTTCACAGCTCTTTTCCCTTTGCGAATTTGAGGGGCTTTTCCATG  
ACGACTAGGTACTGATTTCTTCTTCTGTTGCCCTTTGAATAGACCTGCCTTTTGTGTCATTTTTCAACCCTCTTTC

>TCONS\_00047112

ATAAACCCCTAGCATCCCCTAAACCCTAGCATCCGTTCAAACCTAATTGAGAAAGAGGGTTGAAAAATGACAC  
AAAAGGCAGGTCTATTCAAAGGGCAACAGAAGAAGAAATCAGTACCTAGTCGTCATGGAAAAGCCCCCTCAA  
ATTGCGAAAAGGGAAAAGAGCTGTGAAGCCGTCAAAGAATACAAAGCAGATGGATGTCGATCGGGAGTTGAC  
AAAGTTTATAAATCACTGCAATGAAGTAAAAGCAGCTACATTTGCTACTAAGGATGGTGGTCAATTAAATAT  
AATAAAACCACAGCCTGAGTCCTCCAGTGGTGCAAAGAAGTAGTGCAAAGATGAGTGATGACT

>TCONS\_00047125

CCGAAAAGATATCCGAGCAGGGGCTTCACAGCAAATTGACCAATATAACCAGCAAAAATTGCAGCTGGTTTC  
TTGAAAGCTTCAAGAAAGTCCTTTTCACTTGAGTTGACTCCAACCTGCAAACATTAAAATCCCCAACGCAGGG  
GCATAGTACCTGTTGGTAAACCACGTAAAGAAGGTGGATATATAAGAGCCAAAATTGTGCTACCAATAACC  
ACATGGGGCAGAAAAGAGTTTGCTCCCTTCAAATTTGTCAATAGGGTGTTCTCTTTTTGTTTCAGAT

>TCONS\_00047162

GGAAGAGTAACCGAGAACACGATGAGCGGAGAAAATCAACCATGGTTGTTTGTGCCTATTCGCTGATGCAA  
AGCATTCTCAATGAACCTGTATTGTTTCAGATCCTTCTCTCCAGTCATGTTTCAGTGTCTCCTATGCAGAAGTGG  
AACATGCCATAATCGGCTGCATACCAGAACTTAGCTCTGTTTTCTGCTGGAACGTAGTATAATGTTTCGGCTG  
GTACACCACATTCTCCACCGGAGTCCAGACCAGTGTATAATGATCCGCTGTTCTCCCAAGTTCTTTTCATGATTA  
CCTCTCGCAATCATGAAAGGTACTTTTCGATGTTATTGGTTCCACCTGAGCTGTAAATTGGTCCCATTGT

>TCONS\_00047411

CATGAAGCATGCAGCAAGGATGGAAATGAAAATTCTAGAGATAGAGAAGGCAAGGACCAGAAACAATTAC  
AAATGCTTTAAATTAAGTTGAGATCAAATAATACATGCAACATTTTACAAAAAATCCATTGTTGTCACTGAA  
AAATGGAGCATCAGAAAAACTGATATCTTTATTGAGAGATCTAATCTACAGCTGATCTGCACGTAACCAATT  
CTTCTAGCCACGCAAACAAATACATAATCTTGGAGCCCCAAAACAAAACAAAATGTGATTTAACAGCCAAAC

TCACTCGTCCAACGAGGAAGCACACAAAGATACTACACAAATATGGAACAAGAGAGGATCTTTCTCTACTCT  
GCTCTAGATTGACCAGCGCGAGAAGAGAGGATGATGCCGACAATAAGGCCGTAAAGAGCCAAGGCTTCAGC  
GAAAATAAGAATCAGAATCATCCCAACGAAAAGCTTTGGCTGCTGTGCATTAGCTCTAACACCAGCATCGCC  
AACGATTCCAATAGCCATACCAGCAGAAAGGCCAGCGAGACCACAAGCAAGTCCAGATGAAAGGTGAGCA  
TATCCATCAAATAAATAATACGACTTTGTTTTCGGGTTAATCCCAGTACTAATAATCACAGCTATAATTAACC  
CATAAATACCCAAAACCTCCAGCCATAACAACTGGCACAATTGACTTCATCACCAATTCCGGCCTCATTACTCC  
CATCGATGCTACCCCTACCCCACTTTTCGCTGTTCCATAAGCTGCTCCCATACAGGAGAAAACTAAGGCAGCT  
GCAGCGCCGAGGAACCCGAAGAACGGTGCCGTTTCATCGCCGCTAAAAGTCGATGCCATTTTTTTCTTCAAT  
TGGAATTGAAGCGATTTCGCGATCTGAGAGG

>TCONS\_00047484

TGTAAATGGTGGAATCTTGCATCGAAAGTGCAGTGCGGAAACAAAATATTGCGTGTGCCTTACACGAGTTAC  
CCCAAATATCTGCTGGAAGCACAATTACAGCGTGACGGTGACATCTCTCAATTCTTCGCCATCGATTTCAAAG  
TTCGGAAGGCGGTGTATAATTCCCATTTCCAGTCGCAGCTGAGAATGGATGAATTAAAGTGCCAGACTTCGT  
ATCAATCAAATCATATCCCAAATCCATCTGTATCTGACTCAACTCAGCTTCCTCCTGATTCCAGGCAAGACAG  
TTTGTTCAATCCACAAGAAGAAGACATATTGCCAAAGTAGTCTTAAACCTGAGTGTTGCAGCTGGAATTTT  
ATTATGGGATCTCCAGGTTGTTACTCCCATGCCTCAACTACTAGGCCATCTAATCTGATAGGCTGATATATTTC  
CTCCTCATTTTCCCCAGCAATCACATTCCTATAGGTGTTAAATTGCAG

>TCONS\_00047514

TATTTGTTGTTTCCTTCCACAATGGTAACCCTTCACATCTTGGACCCTTCAAGCGCCAAACAACCTGCAAGATT  
GGAACACTTCAAATTGTTAGTTACCTCCTCAAACGGGGAGGGGAAAAAAGAAATAGATCATCCATGATTCA  
TGCTGTAGCAATTTTATCAAATCTTACTTCTGCAACCTTGATTGGGAGCGCCTGGTACACAGAAAAAATTAGT  
ATGTCAGTGAAGTTGTAGTAAAAGAAGTACAGGAGAAAAACAATGAAGGAAGACTACCATAAACGAAGTAG  
GAGTAATAACAATCAAGCATAGGAAAGGGAAAATTCCAATTTATTGATTTTGTCAACTTGATTGACACAAC  
GGTGATTTAGAAAGGTGAACAGCAGAATCAAGCTGCATGCTGTATAATTCTAATTTAGTACTAGAATATACTA  
GGGTCTCTTGAAAACTGTAGGCAAAAGCTTTAGAGCATGCCTTTGTGATATCTGTGGCTTAACTTTCTCCCTC  
TCCTTTGGTCCTTGTGGTGTTTCGTCCTTTCTGATAGGCACATTTTTTACCTGCAATAAGTGTCAATTAAGGAAGC  
AAAGGTTAAAAACAATTTTATTAAGTAATTCATCTCATAAAGATGTTTGTGGTATACTGTCAATGTCATGC  
AGCACTATACCAAGTTCCTAAACTCAAGATTGTAGAAAGTCTCGATGTATCTTTGCTTTGCTTGTCTGATCT  
CTGTACAATGTCCTCCAAAAAGTATAGATGGACCCCATATTCAATACCTTGTTTGCATAGATCTTCCATGTGTA  
ACTGCAAAAAATTTAGGATTAAAGGATTAAGAAATTTTCTGCAAGATATGTGCTTCTTTGCAATTTGAATGGCT  
TATCTGTGAGTTACCATTATATACGGTTTAGACCCTGGACTGAAATCCTGTTCCAATACTCAGGATCCTCC  
CTGCATTTTTTGAAAAAGTTGGCAATTTTGTGCTTGATTATCCCCATTATTTGGATCAATATGAAAGCCTGA  
GACCCCATCAACAATAATCTCAGCAGGGCCACCTTGTTGGTAGCAAAGGTTGGTAATCCACAGTTCATTGC  
CTCAATGACTGTTAGACCAAATGCTTCATACAATGCAGGCTGCACAAAAGCTCCTTTGGAATCTGCTATTGTG  
CGGTAGAGTTCACTATTTCTGTATCTGTGAGTCTGAGTCTGATCCATCTAATCTGACCTTAAGCTGGTATTTT  
TCTATCAGCATGTGCATCTTTTTTATTTAGCTGCTTCTTCCCTATCCTTGGATTTTGTAGGATCAAAGGAACCA  
CCAACCACAACAAGGTTAACTAAGCTTCTGAGCCTCTTGTTCTTGCCATACCATTCTGTTAGTCCAGATGTGTT  
CTTCACTGTGTCCAGCCTTGCCATGGGCGGAAAGCAGTCAAACGCTTCTGCTTTTCTGTGTAAGGGAAATACA  
CCGATTGGTCTGCCCCAGGTGCAGCAATATTAACTTAGGATCAAAGACATTGATGCCTGAAGCAACTCTGT  
AAAGCCCTGGAAGGGTAAATGCACTATGGCTCTCATACTGTCCTGGTCTATCTTTGCTGCATATGTTGAAGTAT  
TCAAGAATGAGATCCATTAAGTTGCAAACCTTTT

>TCONS\_00047574

GTGAATAACAAATATACTGATGACGCAATGACTTACGTTACAAAATTGATTTCGAGCTGTACTCCACTTTTCT  
GTGTTCCCTCTGCAGTCCAAGCGACCCCTTTTCGCCGTTCTACCTCTGCTCCAGATAATCTACTTCTGCGGCTGG  
AACAACTTGCATTCTCCCGTATCGAGGTAGCGGAACTTTTCAGCCTCGATATCATTTATATCATCAACAAG  
TTTTTTATAATGTTGTAAGATTTCTGGAATAGATTTCCGTGGAACGCTGCAGCAATCTTCATCAATTGATCGC  
TATCTCCAGCATAAATGGCTAGGGCAGTTTCAAATGCTCTGTCTTCCTCCTTAGTCCAAGAGGAGCTATTGCAT  
GTCTGGTCAGGGTTCATTTTGTTAGATCTACAGTGCTTTC

>TCONS\_00047609

TTTTTTACTTAATTTTCTTTTGTTTCTGATTTTTGGGGTTTTGGTCTTTAAATCTTAATCTACAAATCCTAAAAAT  
AATTCTGGGTCTTCTTTACTGTGCTTGTTAAGGCTGTAGCTTTCGATTGCTTTTAGGTTTATGCTTTGATTATC  
GAGATAATTGGGGTACTAGCAAATCCCTAATTTTGATTTTGATTTTGATTTTGATTTTGATCCACAATTGAATCT  
CCAAATGCAAAAATAGCTTTTACAGTTACGTTTTTAGGAATCAGAAGTAATTTTTCTTGAATAGCCATCGCCT  
AAAGCTCTTCTCAGTGTGACTGCTCTTTCGCTGGTAAGTTGAAAACCTCTTCTGAAATTTAGACCTTTTGA  
TGATTGCATGTTTGGTATTTCACTCAAAACCGTGAAATGTGATGTTAGTTGTAATGGGTCTTCATTTTTCTTGAT  
ATTTTTTTCGATTGTTTCG

>TCONS\_00047634

TTTTTCTTTTACGCAATCGCCAATGTGAAAGCACAGATACTACTCCTACTTCTACAAACATCCGCACATGCCTA  
GTCATTGACCTTGGTCTCTTTTGCACGTGCGACGGAACTCAAAGTGGGGTCCATTATCTTGCTCAAAACGGC  
TTTTGCAGGTACATGAATATATCCTGAAGCGGCGACATTTTCATTACAGCCCTGGAAGTGAAGAACCTAGCAAG  
CTTTTATCTCCGACGTCCGGGATGGCATCCATGTAATTAAATTGAAGGTCGACGGCAGTCTTCTCCAATCGCT  
CAATTTCCGGCTCGCTCTGAACCTCTCTCTCACACGTGACCTCCGGCGAAAGCACCTGCTCCGAGCAGCTGGAA  
TCAGTGTGAAGCTTCGGCAGAGAATCTGATGAATCGAAGTACATAAAGTCACTGTAAACCTGCGACGGCCTT  
GTCGAGATCGGCAACGGCAGAATTTCCGGCTTCACATCCACCTCGCTCGCCGGCGGGCGACATTCCGACATTC  
ATTTTTGACTATTCAATTGGTTCTTCTCCATTGTACCCTTCTTATTGTATATTCCGGCATAAAACCCAATCGTCT  
AGCCTTAAGCTATTGTTCTTGTACGAGCAGATCGATCAACATGAGCAAGCCGATATTCGTGCATAATCCAAT  
TCGTCTTTTCTCCTTTTGGAGCTTTCCTGCGTAAAATACCAGAGCTTCTTAATTCCGACAGGCTTCGGATGA  
CCAATCGGCTTATCTGCACCCGTCGCCTTCCAATATCCATTTCCCGCAGCTCGATTGCGCCGTGAACCGTTCCG  
ATATTTCCGATCTCGCGGTGAAAAGAAATACCACTCTTCTCCCCATATAACGCCAAACTTGTACAGGTCAAT  
TTCAGCAATAATCGGGACAGCAATCGGCTGCGACGCACATTTTCGACAGAGATAGTGCATCACAAGCTCTTC  
ATCAGTTGGATGGAATCGGAATCCAGGAGGCAATTGCAATTCCACCGCTGCCATTCTTTTACAATGATTTTGA  
CTTGCTGTATTTGTGTATTTATTTTTCTTTTGATTGATAGGTA

>TCONS\_00047635

TACACCAATTTTTTCTTTTACGCAATCGCCAATGTGAAAGCACAGATACTACTCCTACTTCTACAAACATCCGC  
ACATGCCTAGTCATTGACCTTGGTCTCTTTTGCACGTGCGACGGAACTCAAAGTGGGGTCCATTATCTTGCTC  
AAAACGGCTTTTGCAGGTACATGAATATATCCTGAAGCGGCGACATTTTCATTACAGCCCTGGAAGTGAAGAC  
CTAGCAAGCTTTTATCTCCGACGTCCGGGATGGCATCCATGTAATTAAATTGAAGGTCGACGGCAGTCTTCTC  
CCAATCGCTCAATTTCCGGCTCGCTCTGAACCTCTCTCTCACACGTGACCTCCGGCGAAAGCACCTGCTCCGAG  
CAGCTGGAATCAGTGTGAAGCTTCGGCAGAGAATCTGATGAATCGAAGTACATAAAGTCACTGTAAACCTGC  
GACGGCCTTGTGAGATCGGCAACGGCAGAATTTCCGGCTTCACATCCACCTCGCTCGCCGGCGGGCGACATT  
CCGACATTCATTTTTTGAATATTCAATTGGTTCTTCTCCATTGTACCCTTCTTATTGTATATTCCGGCATAAAACC  
CAATCGTCTAGCCTTAAGCTATTGTTCTTGTACGAGCAGATCGATCAACATGAGCAAGCCGATATTCGTGCA  
TAATCCAATTCGTCTTTTCTCCTTTTGGAGCTTTCCTGCGTAAAATACCAGAGCTTCTTAATTCCGACAGGCT  
TCGGATGACCAATCGGCTTATCTGCACCCGTCGCCTTCCAATATCCATTTCCCGCAGCTCGATTGCGCCGTGAA

CCGTTCCGATATTTCCGATCTCGCGGTGAAAAGAAATACCACTCTTTCTCCCCATATAACGCCAAACCAGGGA  
GATCCCATGGGTCGTACTTGTACAGGTCAATTTAGCAATAATCGGGACAGCAATCGGCTGCGACGCACATTT  
TCGACAGAGATAGTGCATCACAAGCTCTTCATCAGTTGGATGGAATCGGAATCCAGGAGGCAATTGCAATTC  
CACCGCTGCCATTCTTTTACAATGATTTTGACTTGCTGTATTTGTGTATTTATTTTTCTTTTGATTGATAGGTA

>TCONS\_00047644

AAACATATTTTAGATAATTTCTACCACGTGATTTAGTGCTTGACAAAAATGAATGCAGGAGCAAAGAAAAAG  
GGTTTGAATCCAAACAAAGCTCAAAGTCCTATGAAGAAGATAGGTTTTGATTTTCAGTTTCGATCAAGTGCTG  
AATTGGCCAAGCAATTTAGATTAAAGAAAGAAAACTAGCTCATGATAAGGAGCATAGAATTGTGAAAGAG  
CAAGCACCAGTAACCTATAAACGGAAGCATCTTATGCCTACAATATCTAATGCAAGAGAAG

>TCONS\_00047649

GTTTATGAGTTACTGGTGCTTGCTCTTTCACAATTCTATGCTCCTTATCATGAGCTAGTTTTTCTTTCTTAATCTG  
AAATTGCTTGGCCAATTCAGCACTTGATCGAACTGAAAATCAAAACCTATCTTCTTCATAGGACTTTGAGCT  
TTGTTTGATTCAAACCTTTTTCTTTGCTCCTGCATTCATTTTTGTCAAGCACTAAATCACGTGGTAGAAATTA  
TCTAAAATATGTTT

>TCONS\_00047739

AAAAGATAAGTTGTTCTTACTTTTCCTATGTCGTCACGAACCTTATTCAACACCATAGTTACTTCAGCCTCCAG  
AGTCTGGGCAGCATCACAGCCTGGTTGCACGGCAAGCTTTCCTTCATTAAATTGTTGAATACGATCTTCACATT  
TCTTGTAATTTTGATGAATCTCTTCTGTTTTTGCTTAGCTAAGTTTTCCCCAGGTGTGACATCATCAATCCCTAT  
AGAAAATCCATGATTACCAATCCACCGAGCACTTAATTTTGCAAGCCGATTCATGCATGTTGCAGCAGCATGT  
GACTTGATGTCCTCAACAAAACAGAGTATAGACCATCCTTATTTCCATTTCTTAACGTAGCCTTCCCGAGTTG  
CCCGCTGATCAGTTCATATTACGGAAATAAAACAAATCCATCACTTGGGCACATTGTTTCCCCTTTCCCGCTGT  
AACTCTTTTCTGTGACTGTTAGATTTACATAGACTCTCATCTTTGAATATGGACGCAGCAGCAGCAGCCAAAGAG  
TTGTTTCCCAGTCCAAAGCTCAACCGGCTGTAAAAAGCCATCTCAGTCATTTGAAGATCCAAAGACAAGACA  
AACAATAAATTCTACTGGCTTCAGAACGTAAAAAAGATGGAAACAAAACCTCAACCAAACCATACTACTA  
ATAAAAAAAGGAAGGGTGTGCACTATGATTTTGTTAGTGTTAATATGCATATTCCAATCCAAATCAAATAT  
CTAGGAAGAATGATGACTTGTTGCTTTCGCCAAAAGCTTCAAAGATCAAAATTTTCAATCAAATGATATTTT  
G

>TCONS\_00047757

TTTTTCATTAATTATTGAATTGAAGCAAAATCAACAATCAATCTCGTTTTAGGACTCATCGCTGATTGTGGCTA  
AGATATAGACTAGTACTGCTTTGTATTCAACACTTATTGCTTCCAGATGTCTAGGACTTTACAACGTTGAAAAT  
AAATACGGCTCGTGAAGCTTTGCCATTAATTGCATTCTAGAGTGGAATAAGGATTTTATAGTAATTCAATCAA  
GTAATACCGACCAAAGTTGCAAGTTTCAGAAGAACCAGTGTAGAGAAGAGACTTGGTGTATTTCTTGGTGAG  
TACACTTGCCAGAAGTCGTAGATGTGGGTAATGTTTGTTTATTATGTGTTCAACTGCCTCATGATAAATCTTTT  
ATATCTTACTTGAATGTTATTTATGGATGTCAATTTGGAGACATCAGTTTCTGGTATATCTATCCCTTCATTTGC  
TAGCACACATGCATATCAGTGCACACTCCTATATTTGTTTAGGTTCTTGTCCCGATGCAAAATTGTAAATTTTC  
TGAGAGGTTACTGGTTTGTGGGAAATGGCATGAAAACATAATCATGTAGGAAGCCGAAATGATTATGCATTT  
TATTTTCCAAGCAAGAAAAGAAAAAAGGAGATGG

>TCONS\_00047758

ACTTTTCTTTATATCTTCAACCTTCTTCACTGGACGCCTCTCATAATTTTCAGATAAAAGTTTGTATTTTTC  
TTAATTATTGAATTGAAGCAAAATCAACAATCAATCTCGTAAGGACAAATGCTGGACCTATTCCAATTTTCATC  
TTGGATTGTTTTAGGACTCATCGCTGATTGTGGCTAAGATATAGACTAGTACTGCTTTGTATTCAACACTTATT  
GCTTCCAGATGTCTAGGACTTTACAACGTTGAAAATAAATACGGCTCGTGAAGCTTTGCCATTAATTGCATTC

TAGAGTGAATAAGGATTTTATAGTAATTCAATCAAGTAATACCGACCAAAGTTGCAAGTTTCAGAAGAACC  
AGTGTAGAGAAGAGACTTGGTGTATTTCTTGGTGAGTACACTTGCCAGAAGTCGTAGATGTGGGTAATGTTTG  
TTTATTATGTGTTCAACTGCCTCATGATAAATTCTTTTATATCTTACTTGAATGTTATTTATGGATGTCAATTTGG  
AGACATCAGTTTCTGGTATATCTATCCCTTCATTTGCTAGCACACATGCATATCAGTGCACACTCCTATATTTG  
TTTAGGTTCTTGTCCCGATGCAAAATTGTAAATTTTCTGAGAGGTTACTGGTTTGTGGGAAATGGCATGAAAA  
CATAATCATGTAGGAAGCCGAAATGATTATGCATTTTATTTTCCAAGCAAGAAAAGAAAAAAGGAGATGG  
>TCONS\_00047774

CCTTCCAAAGAGTTCCTCAAATTGATCTATAGACACCATTAATGCAGATGGCTCAGCCAACTTATTTACTGTCT  
TGAACCTAGCAACTGGAGCAACTATGTTGGCACGCCCAGGGTTTGAACAACCGATCTCCCCTGAAAGGTTTA  
GCAGCCGTACACACGGATACCCGTCAATGGCCATGTACATTGACTTCTCAAGATCAGGAACTGACTGGAAAG  
AGTTCATTGGTCTGACGCTGAGATAGAGAGGAAAACTGAGCAATGAAGCAGAGAAGAAAAAC  
>TCONS\_00047775

CCTTTAGCTCCCAATTTCTGGCTTTAAAGGCAAAAGGTTTTGAGGTAAGGGCTCCAAGTGGACAAATATCAAT  
CACATTCCCTGAAAGTTCATTGTCTATAAGTTTTTCAACATAAGTTCCAATTTCTTCTCCACTACCACGACCCA  
ACATTCCAAGGTCCTCTGTTCCAGCTACTTCTGTAGCAAATCTGACGCACCTTGTACACTGGATGCACCGGGT  
CATCACAGTCTTCACCAATGGGCCCCAAATTCTTGTCAACCACAGACCTCTTCATTTTCAAGTAAACGCCACGG  
TCTGAGCCAAAGGCCATAGACTGATCTTGGAGATCACATTCTCCTCCCTGATCACAAATTGGACAATCCAGTG  
GATGATTCATAAGCAAAAACTCCATGACTCCTTCACGAGCCTTTTTGGCAATAGGTGTATCTGTCTTGATCTTC  
ATTCCTGGAAGTGCAGGCATGGCACAAGAAGCAACA  
>TCONS\_00047783

AGCAACATATATTTTAAAGTTTGGCGATAAGCAGAGGAGCACCATACTGTGGATGAATCGTCACAATTGCAA  
ATGGAGCATGTGTATAAGATGGGGATAGTTCAAAGGAGAATTTTTGTAGTATCATAGCTACTGCCATTTTTGC  
TTCCATCATTGCGAAGTTTTGTCCAATACAAACACGAGGTCCCCAGCTAAATGGTATAAATGAGACTTGTCCA  
TTTGTGCTTAGACACTCCTTCACTGAATCTTTCTGGTTTGAATTCCTTTGCGTCTTCACCCCATATTTCTTAT  
CATAATGTACTAAGATTGCTGGTATAACGAGTAGCACTCCAG  
>TCONS\_00047793

GGACTCGCACAGTGACACTGCTCCCAATCTTCCACCGATTGGTACTTCGTTTCGACGGGTAGCGATGGTGATGA  
CCAACCTCAATGGTACTGGTGTAGGTTTCGGTGTGTCATTGGTTGCGGTTTTGGAGTAGGATGGGGTTTTCGG  
AGGTTTGCTTCTTTCCAATTTCTTACTTAACAGTTTTATTGTGTTTGTATCAGCTAAAA  
>TCONS\_00047812

CTCTCTCTCTCTATCTATCTATCTATGTCATCTCTTAATGTAAATTTAGAACTGTTATTCTCTAGACATGGT  
CAGTTCCCAGCTGAAGCTTCATAGGTTTCACACTGGTCGTGAATCCAGGGTTGTGACAGCTCTTACTCTTTGA  
AGACTCACCTTTTCAGCTACCAAGGCCATGTCTCAGCTGCTTTGGTCCTTGGTGGTGTGGATGTCACAGGGCC  
CCATCTGCATACTGTA  
>TCONS\_00047977

TAGCAGCTATCTCTAGAGGGAAGTTGTGAGCATTACGTTTCATGCATAACTTCCATACCAAGGTTAGCACGGTT  
AATGATATCAGCCCAATTGCCGTCAATAAGGTAGGGATCATCAAAACACCAAACCATCCAATGTAAAGACG  
GTTTTCAAGTGTGGTTATCCAGTAACAGAAGCGACCCATAGGCTTTTCGCTTTCGCGTCTCTCTAAAATTGCAGT  
CATGGTAAAATCTTGGTTTATTTAATCATCAGGGACTCCCAAGCACACGAGTTTTCTACAAATAAAAAATATAA  
AATGGAAGGCTTGTATTCAACAGTAAAACATGACTTATATACTC  
>TCONS\_00047978

CTCTAGAGGGAAGTTGTGAGCATTACGTTTCATGCATAACTTCCATACCAAGGTTAGCACGGTTAATGATATCA  
 GCCCAAGTATTAATTACACGACCTAAAGTGGTAAACCAGATAACTACTACAGGCCAAGCAGCTAGGAAGAA  
 GTGTAACGAACGAGAGTTGTTGAACTAGCATATTGGAAGATCAATCGGCCAAAATAACCATGAGCGGCTA  
 CGATGTTATAAGTTTCTTCCTCTTAACCGAATCTGTAACCTTCATTAGCAGATTCAATTTCTGTGGTTTCCCTGA  
 TCAAATAAAAGTTACCAAGGAACCATGCATAGTACTGAATAGGGAGCCGCC

>TCONS\_00048006

GGAAGATAACAGGGAAATTATACCTCAATCATTCAAGGGCATCAGTTCAATCTTCTTCTTCTTGTTCACGAA  
 GAAGTCCACTATCTAAATCTGAAAGCCTCGAGAAACCACTTCTCCTCCTGGAAAATAATGAAGATCGACTCA  
 CAGGCAGATTTCCAGCATCAGTTGTAAGGTTTTCCAAGTGAAGTGCAGCATCAGAACTTCATTTGATTGAGA  
 GGAAGGAACAGATGACGTAGCAGAGCTTGTCTCCACAATTGAATCCAGAGTCTGACGTTCTGATCGTATGAT  
 AGCAGCATCTCTTCTCAAAGAATTATCTTCATCAGCTGCAACGTGACTAATTGGTAAAACTTGCGAATTGTTTC  
 TTTCGCGAATGCGGTCTGTGAGTGACGCTGCAAGGTCCTCAAACATCTGCTGTGCATTTTCTAATTCCGATGAA  
 AGAGAGGCAGCACCTCTGATAATACCCTCGGAAACACTCGTGACCGTAGTCCCCGGCTGCCTATGGGATCA  
 GCATTTTGCAACTCATGAGAGCTGCTCAGAGAACTTGAATAACGTCACCAGTCGCAAGTTGCTGTGACGGG  
 TGATCCCCCAATCCAATACTGGTCCTAATTCGCCTAAGTGCTTCTGCAACTGGGATATGAGACAAACCCCGAG  
 TCACACGCTGCTGTCTAACACTCTCTACTCTATGTGCTTTTGGCCTTGGTGGTATTTTGAAACCACACTCCACA  
 AGTTCTTTTGAGCAGTAACTGTGGCCATTACCATAAATTGGAGTAATATTTTCATCTATAACCTCTCCCTTGCA  
 AACAGGACACTCTTTCGTACTCGAATCAACATAAGGCAACTGATAAAAGCATGACCAGCAATATAAATGGC  
 CGCAACAAGTCAAGATAGGTTCTTTAGCCATATCTAAACATATATTACAATCAAAGAACTTCCACTTCCACC  
 ATCCTTACCTACTTTTTTAACCACTAAATCCATCTCCAATGCCTTTGCTACTAAATGGGATCTATCTCTTTTGCA  
 TCCTTTTTCTTGCTTCTCATTATCCACGTTATTATTACCAATATCATCAGAAGAAGAATTACGAGTTTGGGAAC  
 GCCACCTATGGTGTGCGCAAGTTCCAGCTGCAACAGCCGCAAGCTGCAGAATTCTTTGCTCTATCCTACTATT  
 AGCAGTTTCCAAATCATTCAACAAAGACCCTAATCCTAAAGCAGTACCAGAAGATGACTCCGTAGGTTCTGT  
 GTTCAAATCAAGATCCATTACTACACCATTCATCAAATTATCCGCCATCGAAGAAACCCTTTTCAAGTCTGCA  
 TAAAAGAGATAATCCAGGTATCCGAATTAAAGGAATCAATAGCATGTACACTGATTTGGCCGTCCACCATGG  
 GTTCTTCTGCTTCTACAAACAGCTTCCGAGGTCTTCAGAGAGA

>TCONS\_00048207

TCCCTATGCCACCAACTCCGTGAATACCAATCATGCGAACTCCATCTTCACATTCATTTTGCAATAACAACCTCT  
 ATATCTTTGACACGAGAATCTACTCCTACTGGGTGCCAAGCAACATCTAGAGGTGTCTGGTTAACCTCTTGTA  
 GGACTTGCTGTATAATTTTTTCAATAAACTTTGATTCATGCCCGTCAGCAACATTTTGCAAATCCCATCCAGAT  
 AAATTTGCAGCTTCAGTAAGTGCAGCTCTCCATTTCTCCACCCTTTGAGCTCCAAATGGTCGTTCTTGTGTTTA  
 GCCAAATATTACCAAATAAACCCAGTTTGCTTTCTCACTTCAGAAGGATCAACATCATAGAAAATAGGCAAA  
 ACCATCTGCTTTAGTTTCTTTGCATTCAAGAATTTTAACTAGTTCATTTAGACACCAACTAGAGGAAGCATA  
 ATTTCTTGAGAAAACAATAATGGAAATTCTTGACT

>TCONS\_00048333

AACAGACAACATTAGATGTTCTCGGCCAACGAAGCCTTCCTTTTTTGGTCTACATCCTTTGTAAGGTAAGTTGG  
 ATAGTTCAATACTTAGATGTGTTACAAGTCAAAATAAGGTAAGTATGATTCCAAGATTTTCATTACTTTTCAGTAT  
 ATCATATATACATGTCAGTTCAGTTTAATTAAGTTATTCATATGTTATCTGCCTTACATAATTAGTACATTTTTT  
 TGTAATAATGTCCCATAGTCGGGGAAGTGCATTCATGCCTGCAGGTTTCAGGTATCCAGTTTGGCAGGCTCATG  
 TCATAGACAGAGTTGATATCCAGCTGATGACTGGCAAAGCTCCATTTTCATTAGGACTGCAGCCGATTCTAGAG  
 GTTATCAGACTATCCTGTGTGTGTTTGTGTATATATATATATATATATATATATATATATATATATATATATA  
 TATATATATATATATATATATATATATATATACTTATGGGTAGAGTCCTGTCTGACCATATTTTGATGTCATATACT



TTTAGAGGCTTTGTAGACACAGGTTTCATTATGTACAGTATATCAGAGGCCTTGACGACCTGTGTGTATTTCATGT  
TCTGATTATGATGGTTCGCTGCTACAGCATTGCTCACTTTCATTTCATACCTTATGAGTTGTGGCCATGTTGGCC  
CATGATAGTTACAAGAAGAATAAGTTTCAGCCAAGTCAGCCTATGTATGCTCTAGTTTTTCATCGAACGATCATG  
ATTTACAGAGTGGTTCGCTCGGGCCAGTACGACACCGGGTGCCAGCCACGCCTCCCCAAGTTGGGGAGTGAC  
ACTTTGGCCCCAAGATAAACAAGGAAGGGGATAATGGATCCCTGTCTCACCGCCCCAGTAGAGTGAAAGAA  
CCCCTTCTTAATGTAATACCACATATTAATACTATTGATATTCATACCAAGTCTATCCATTATTCTGCAAACCCAA  
ATCTCCTCAGTGTTACCAGCAAGAAGTTTCAATTCATTCTGTCTATAAGCTTTGACATGTGAGTTTAAGGACTA  
CATTCCCTCATCTTCTTTTCTTTTAAATCCCATGTATGATCTCTTGAGCTAACAAAACCTTTTGGTTATCAACCTT  
CCATGAACAAACTCCCTTTGGTTTTAGAGATGAGCTTCGGAAGGATAGGGGCTAATATGGAGCTCATAATCGT  
AGAATAATCTTATTAGAATAATTACTTAGATTGATTGTCTGAACTCAGAAAAACACGAAGGACTTTTCACCCT  
AGGAATTACAAATAAATATGTGTTACTGTAAAACCTTAGAAAAGTCTAGAGCCATCGAAGAATAACTGTACCAT  
ATTAGTTAGGTCAAAATTTATAATTTCCAATCAGCTTTAAAAGAATGCCCTCCATATCCATCTGGTCCAAGA  
GCACTATTGGGATCCATGTAAAAAATAGCTCTTTTAATTTTCTCTTTATCATGGATGCTGTCAGAACATCATT  
TCTGCTTGAGTTACAATCTGATTAATGCATTGTGTAGGTGTTGAAGATGAGAACTCCTTCTGCAGAAAAAAG  
CTTCTCAAAGTAGTTAACTGCTTCCCCTGCTCCCAGTAATCCAATCTCCATTCTAATTCTTTATTTTTGTATATA  
GTTAGTTTTCTCCTTTTACCTTTTACCGTGATAATGTCATGAACATTTTCCGGTTAGAATCTTCCTCTTCATGT  
CATTTACCAGAGAGATAGTTATTTCTATGACAAAAGGATATATAACCTGATCTTCTCACTATAAAAATTTAAT  
AATCACATGCATAGGGAATTCATCGCCAATCGCTGATTTTGATCCAGTGTTGATTTTCTTTTGTGCAACATAA  
ATATCTCTTCATAGGTGATGGATTAAAAAGAACTTGTATGAGAAGTGCTATGACTACAAAAAAGAATTA  
AACACGACACAAGTAGAACCGCAAAATACGTTGTGCTTTCTTAGCTTCATTATTATCTTTTTATTACTTTTTCTA  
TGTTACCTTTTCATATAGTCCAATTTCTATAAATTATAGGGTAGACATTCCATTAAAGTGATGATCATCTTCAA  
ATACGCTTCATACATATTTATACTTTATTATATTAATAAAGTAAAAGAAATTATCTTATAAAAAATTTGATTGT  
TCATCTTCATAAGTTCAGAGGATAATGATCCACATTCATGATTTCATAAAAGCTTATACTTAATTATTGTTTCAT  
GTATATATCATTATCTAAAGTTTTATTTAATAATATTACTATTAATTTATAAAATATATATTGTATAAATTAATA  
AACACGTGGCGAGAGACTAATTTTATTAATAATCTTTTTAAAAGAGAAACAAAATTAATAAAAGTAGCCCCAA  
GAAAGGGCTATTTCAAGAAATGAGCGGGAGAAGGATTGCCTCCAAAACAAGGTGCATATGTTTCAGACAGCA  
AAATAGGAAGAGACATATACGGGCGACGTGTCAGCAAAACAATAAGAAAAGGTCTCCCCGGGGATGCTCCG  
TTAAAGTTGGCGTTTGTCTTTCTCCAATGCCTTTCTTCTTTGCTTGACTTTTCGGTTTTCCGTTACCAAAAAAGTCC  
TCCAAATGCGACGTGCTTGTCACTTCCACTTCCCCTCATTTACACACCCAAAAAGAAAAGGCCAAATTAAT  
ATTTTAAATTCAAAGCAAGTAAGAAAGTACACATGTATTATTTCTCGTTTCATCGCTGCAGAAAAAAGTATTA  
TCTTCATTTTGATATCACGTATTTACCATTTCTGTTAATATGGGTTTGAATGTGATTGTCCCAATGCAGGATAA  
TTTGTGTTGTTGATAGCGAATGCGAACCTTATTCACGCCGAGACCATGACTACTCAAAATGCTGACGCTCCCC  
AGGTAGAAGTGGGTAGTCAGCCGCCTGCACCACCTGCGGCGAATGACCAAGCACAGTTGCATTCTGGGAATA  
AGGTTTACAAGAGTGGCCCTCTATTTTTATCATCAAAAGGCTGAAACACTAGAGGATTTGCTTGAGTGGAAG  
CAGCACTTGAGGAGGCTTTGGCAAGTGCACCAAAATGCTGATCCTGTAACCTACCCAAAATGGAGTATCTAGGA  
ATGATCAGGGCAATGCAGTTGACCATTTCATCAGAGCAGTGTAAGCTTCTCATTGATATGGTTATAAATGATGT  
GAACCTTTGACGTATATCTGTCAGTTATAAGAACAAATTGTGGGGAAAATCTGCCTATTATATAGCCTTACTT  
ACATTTGATTTACAAGACAACCTCTTTTGCGAG

>TCONS\_00048385

CTTTGCCAACACCTTCATCTTCTTTGTTACACCTTGCAAATCAAACCTAGCCAAGCCCGGATAAAAAATCGGAC  
ACATTCGGAGTACCTAACAACTCAGTCATCTCAGTCACAACAAGCCTAAACTCTGCACCAAGACTAGATCTTT  
CCTCTCCCTTTACTGTACCACCCCATACATACTTGTAATCACATTAAGCACAGTCAAAAACATCTGTTACC

AATATTTACTGCTACACCCTTCTGATTATAAAGGTAATTAATTGTCTTTCTAAGCTCTTCTCTTCTTAGTTCATA  
AACAGAATCTAAAGTAGAACCACTAAGCATATCACGAACACAACTTTCTCAACATACGCCATTTTGGTCC  
ATAAGGAGTCCAACTATATCTTTACCACCATATGTAGCTTCTCTACCAGCACCAGGCACATCTCTATTAGCA  
AAAATTGTATCTTGATCCTTAAGAATCTCACGAGCTAAAGCAGGAGAAGTAATAATAATCCCAACTTTTTTAC  
CAAGCCATAGTCTACAAATGGGGCCATAAATTTGGGAAAGAGAAGCAAAATAGGTGTGAAGTTCAGGATCA  
AGAGAGAGGAGATTACCTACTAAAGGCAAAGCTTTAGGCCCTGGTGGCAATGGGGGTTGTTCCCTTCTTTGACT  
TATTGATGAAAATCCAAACAAACCATAGTAAAGCTATAATTCCAAGAATATAGGAGAAAAAGACACCATTTT  
GCTCCATATTTTGTCTTGCAAATGCCATGGAAAAGAATCAAACAGAGGTTTGAG

>TCONS\_00048386

CTTCTTTCATAACTGCATAGAGATATGGTAAATGCTGAATATGAGACTCTTCCACTATGTTATCTTTGCCACA  
ACTGTCTCCAGTTCCTGTTGTAATTTCTCAGGACCTTTGGGTTGTTCTGAATTTAGCCATGGCAAATTCAAC  
AGTGTGGAGGTTGTGTCAGTTCACCAACAACCATATCCATGAGTAAGGCTTTGAGTTCAGTCATGGTAAGA  
GGCATTTTAGCATCTGCTTCATCTTTCAACTTGAGCAAACTTGCAAAAAATCCTTGCTTTCTTGGCCAACACC  
ACTTCCTATCCCACCATTCTATCCATTTTCTGTCTTTGATCAATCATAGTCTCAAATATCCTATCAAATCTCTTT  
ACCAACACCTTCATCTTCTTTGTTACACCTTGCAAATCAAACCTAGCCAAGCCCGGATAAAAAATCGGACACAT  
TCGGAGTACCTAACAACCTCAGTCATCTCAGTCACAACAAGCCTAAACTCTGCACCAAGACTAGATCTTTCCTC  
TCCCTTTACTGTACCACCCCATACATACTTGTAATCACATTAAGCACAGTCAAAAACATCTGTTACCAATA  
TTTACTGCTACACCCTTCTGATTATAAAGGTAATTAATTGTCTTTCTAAGCTCTTCTCTTCTTAGTTCATAAACA  
GAATCTAAAGTAGAACCACTAAGCATATCACGAACACAACTTTCTCAACATACGCCATTTTGGTCCATAA  
GGAGTCCAACTATATCTTTACCACCATATGTAGCTTCTCTACCAGCACCAGGCACATCTCTATTAGCAAAAA  
TTGTATCTTGATCCTTAAGAATCTCACGAGCTAAAGCAGGAGAAGTAATAATAATCCCAACTTTTTTACCAAG  
CCATAGTCTACAAATGGGGCCATAAATTTGGGAAAGAGAAGCAAAATAGGTGTGAAGTTCAGGATCAAGAG  
AGAGGAGATTACCTACTAAAGGCAAAGCTTTAGGCCCTGGTGGCAATGGGGGTTGTTCCCTTCTTTGACTTATT  
GATGAAAATCCAAACAAACCATAGTAAAGCTATAATTCCAAGAATATAGGAGAAAAAGACACCATTTTGCT  
CCATATTTTGTCTTGCAAATGCCATGGAAAAGAATCAAACAGAGGTTTGAG

>TCONS\_00048388

TTGGCAAAAACGGAGTCTTGATCACGAACACTTCTTTGGCTAAGGATGGTGAATTCAACACAATGCATAGTT  
TGCTTCCTAGCCAAAACCTTGATATTGGACCATACTGTTGAGACAACTCTGTAAGCTGGTGGTGCAAATTGGG  
GCGGAGGAATGGTAAGAATCCCACAATTGGAAGGCCACGAGGCCCTGGTGGCAACCTAGGTTCTGTCTTCTG  
TGGTATATTTGATGTCTTTTGTACCATATAATTGTCAGGAACACAATTGAAAGGGTAATACCATGAGTAAGG  
CTTTGAGTTCAGTCATGGTAAGAGGCATTTTAGCATCTGCTTCATCTTTCAACTTGAGCAAACTTGCAAAAA  
ATCCTTGCTTTCTTGGCCAACACCACTTCCTATCCCACCATTCTATCCATTTTCTGTCTTTGATCAATCATAGT  
CTCAAATATCCTATCAAATCTCTTTACCAACACCTTCATCTTCTTTGTTACACCTTGCAAATCAAACCTAGCCA  
AGCCCGGATAAAAAATCGGACACATTTCGGAGTACCTAACAACCTCAGTCATCTCAGTCACAACAAGCCTAAACT  
CTGCACCAAGACTAGATCTTTCCTCTCCCTTTACTGTACCACCCCATACATACTTGTAATCACATTAAGCACA  
GTCAAAAACATCTGTTACCAATATTTACTGCTACACCCTTCTGATTATAAAGGTAATTAATTGTCTTTCTAAG  
CTCTTCTCTTCTTAGTTCATAAACAGAATCTAAAGTAGAACCACTAAGCATATCACGAACACAACTTTCTC  
AACATACGCCATTTTGGTCCATAAAGGAGTCCAACTATATCTTTACCACCATATGTAGCTTCTCTACCAGCAC  
CAGGCACATCTCTATTAGCAAAAATTGTATCTTGATCCTTAAGAATCTCACGAGCTAAAGCAGGAGAAGTAA  
TAATAATCCCAACTTTTTTACCAAGCCATAGTCTACAAATGGGGCCATAAATTTGGGAAAGAGAAGCAAAAT  
AGGTGTGAAGTTCAGGATCAAGAGAGAGGAGATTACCTACTAAAGGCAAAGCTTTAGGCCCTGGTGGCAAT  
GGGGGTTGTTCCCTTCTTTGACTTATTGATGAAAATCCAAACAAACCATAGTAAAGCTATAATTCCAAGAATAT

AGGAGAAAAAGACACCATTTTGTCTCCATATTTTGTCTGCAAATGCCATGGAAAAGAATCAAACAGAGGTT  
TGAG

>TCONS\_00048393

AGTTTCCAATCATAGGAATGCAGCAATGAGGCCAATACAAACATAAGCATTTTCTCAGCTAAAGGAAGGCCA  
GCACAAATTCTCCTCCCTGATCCAAATGGAAGGTAAGTGAATTTCCGGAATAGTTTAAATTTGTAGAGT  
GACTCAAGAACCTTTGAGGCTGAAATTTCCAATGGATTTTCCCACACTTGAGGATCCCTATGAATCGCATAAAC  
ATTCAAGAATACTTTAGTTCCCTCAGGTATTTTGTATCCACCTACTGTTGCAGATTTGCTCGGGTGCTTAGGGA  
TAAGCAGTGGTAATGCAGGGTGTAGACGTAGAGTCTCCTTTAAACCGCATCAAGATAGTGTAGTTTCAGCA  
AGTGAGATTCTTCAGCAATGTTATTCATC

>TCONS\_00048398

GTTCAATTTCAATCTGATACTCAACTGTAAGTATTAGTATTAACATCAAAAGATAAGGACATCTAAAG  
GCAATGTGCTAGTCAATTGAGAAATAATATCCCCACCTCCTAGGTAAGATGAAATATAAGCTAAACATTCA  
GAATGAGATCCACGAAGCACCGACCCTATCGCGAGGAATTAGGCGCAGTTCAGATCCATGTTTAAAGAAAGA  
CGTTACCTGCACTTTGTTGAGGATTAATTCCCACTCCATCATTAGTGATGATGGCGCTTGTGGGGAGGGACT  
TTGAATTCCTCCGCCGCAAATTTGAGAACAGCGGTGAACGGAGCTGCCTCCGGTACGCTAAAAACTTTGAAT  
GGCAATTTGGGATCGGAAGTAAGAGTGACTTTGAACGACACTTTTCTCCTCCACCAGCAGCAGCACCTCCACTC  
GCCATCTTTTCTCACTACCGCTACTGTATTGGAATTTTTCTGC

>TCONS\_00048444

CGGGGTAAATAGAAATGGAAAAGAGATGTTTCTATTTTCATCCAAATTAGAAGCTTTTCTACATCCATATGAT  
CTACTAAAGTAGATCGGTATTGACCATATAATAAAAGCAGATCTTGGTCCATGGAGTCCCAAGAAGGTAAGA  
ACTCCAACCTGTCCGATTCTTCTTCGGCCAAATACGATATACAAGTGGGACCTGCACTATGAGCAAGCTGTGC  
GAAAAACCGCTTCTTTTTTCCGGTTCCGAAACAACCTTGGGCGAAATAGGGTTCTACCGGGAAACCATGGATT  
TTGAGTTTTCGCCATTGGTTACTGGTTGAGCCATGGAATGGAATGAGATAAGAATCCCTGGAGATCTTCTCTCT  
CCACTTACTCGTAACAGGCTTTTCTTTGTAGAAGACTTCTTCCGAATGGCATAATTGTCCGACACTACGTTCC  
TCGATCTTCAAAGAAAACCTGACTCCTCCTACTCCTCCTTCTCCTTTAGGATAGGATCCTCCTTGGTCCTTCTTTC  
ACTAATGGTCTCACCATTTT

>TCONS\_00048445

AACAAAGATATGAACGGGGTAAATAGAAATGGAAAAGAGATGTTTCTATTTTCATCCAAATTAGAAGCTTTTT  
CTACATCCATATGATCTACTAAAGTAGATCGGTATTGACCATATAATAAAAGCAGATCTTGGTCCATGGAGTC  
CCAAGAAGGTAAGAACTCCAACCTGTCCGATGCTTCTTCGGCCAAATACGATATACAAGTGGGACCTGCACT  
ATGAGCAAGCTGTGCGAAAAACCGCTTCTTTTTTTCGGTTCCGAAACAACCTTGGGCGAAATAGGGTTCTACCG  
GTAAACCATGGATTTTTGAGTTTCGCCATTGGTTACTGGTTGAGCCACTGGAATGGAATGAGATAAGAATCCC  
TGGAGATCTTCTCTCCACTTACTCGTAACAGGCTTTTCTTTGTAGAAGACTTCTTCCGAATGGCATAATTGT  
CCGACACTACGTTCTCGATCTTCAAAGAAAACCTGACTCCTCCTACTCCTCCTTCTCCTTTAGGATAGGATCCT  
CCTTGGTCCTTCTTTCCTAATGGTCTCACCATTTT

>TCONS\_00048447

AACAAAGATATGAACGGGGTAAATAGAAATGGAAAAGAGATGTTTCTATTTTCATCCAAATTAGAAGCTTTTT  
CTACATCCATATGATCTACTAAAGTAGATCGGTATTGACCATATAATAAAAGCAGATCTTGGTCCATGGAGTC  
CCAAGAAGGTAAGAACTCCAACCTGTCCGATTCTTCTTCGGCCAAATACGATATACAAGTGGGACCTGCACT  
ATGAGCAAGCTGTGCGAAAAACCGCTTCTTTTTTCCGGTTCCGAAACAACCTTGGGCGAAATAGGGTTCTACCG  
GGAAACCATGGATTTTTGAGTTTTCGCCATTGGTTACTGGTTGAGCCACTGGAATGGAATGAGATAAGAATCC  
CTGGAGATCTTCTCTCCACTTACTCGTAACAGGCTTTTCTTCTGTAGAACACTTCTTCCGAATGGCATAATTG

TCCGACACTACGTTTCCTCGATCTTCAAAGAAAAGTACTCCTCCTACTCCTCTGGAATGGAATGAGATAAGAA  
TCCCTGGAGATCTTTCCTCTCCACTTACTCGTAACAGGCTTTTCTTTTGTAGAAAGACTTCTTCCGAATGGCATAA  
TTGTCCGACACTACGTTTCCTCGATCTTCAAAGAAAAGTACTCCTCCTACTCCTCCTTCTCCTTTAGGATAGGA  
TCCTCCTTGGTCCTTCTTTCACTAATGGTCTCACCATTTT

>TCONS\_00048569

TGGATACGGCTTTTTGATAAACAAGATCCAAACTTGATTTTCTAATATTATTATCTCTCCATAAACTTCATCCG  
AAAAACATAATAATCTTAAACAAACAAATATCCATCAAATTACCCAAAAAGACCTACTTTTTTCTCTTAAGA  
GGCCCAGTTTTATACCCAGATTTAGTAGGTTTACCCCAAGGAGTCAATGAAACCCTGCCATGACTTCCACTAC  
TCTTACTCCTCCCTTACCACCCCCATGTGGATGATCCACCGGGTTCATCGCCACACCCCGAACTGTCGGTCTC  
CGTCCTAGCCACCTGGCATGTCCCGCCTTCTCAACTTCTTCGTCCTCGTGTCCGGGTTTCGATACTTGCCCTAT  
AGTAGCCCTACATTTAACGTCGATCAATTTCTTCACCCCCGACGGCAACTTCACTTCGCAGTATTTAGTAGAA  
GCGCTGGGTTCCGGTCAGGATTTTGGCGGACGTGCCGGCGGAGCGAACTAACTTGCCGCCTTGTCGGGTCCG  
ATCTCGATGTTGTGAATCAGGGTTCCGATTCGCATCATGCCTAATGGCATGCAACTTCCGATTTGGGAACTGA  
TGTCTAGACTGAATTGGCTCATCATTGATTCCAGCTCCTTTGACGGTTTCATTTTGGACGCCAACGCTTCAAAT  
GGACTGGTAGAGAAAGAGCGGT

>TCONS\_00048633

TTTTTTTACCAGAAAAACCCTAGCTCTCTCTTTTTATCTCCCCTCATATTTTTACCAATTCATACTCCATATTTAA  
TCAATTGATTTTTTCCGAGCAGAATTGATACAAGGGATTCATATAGTTGACCCCATCTAGTTTGAGATTGAGG  
GAATTCGTTGGCTGATCTGATGTTTATTGATTATCACATGGATGCACTATTTCTCTATTTGCATGTCACCTCTGTA  
TTTAATGATGGCTCTATGTTACTCGGTATAATCTCTGGTCCTCTTGCAAAAGGTCTGCACTATTGTTCTTTCCTT  
GATTGAGCTTCATGCTTCCATTTTACATACATAGACAGACCAGAAAAACAAGCAAACACATGGCTCTTCTAA  
GTTTTGTGTTTCGATCTGTTTTCCCTGTTCTTAGCAACCTATGCCCTATGGATAGCTAGAGCACTTACTCAAGGTC  
ACTGAAATTTATGATTTGTTGAAACCTGTCATGTAGTGAAATTTCTTGCTCTAGATCTCTGTTCTTTTGTATGTG  
TTGAACCATAAAAATAGGAAGGAGATACTAGTTAAACAAGAT

>TCONS\_00048642

TGATTGCCTCGAGGGTGATGTAGCTGACGATTGGGCTACAAGAAGAGACTTTTCAATGTCTGCCAACCTGATC  
TCTAATTTTGCATGCATGACTGAATAAAGTAACTGCTGCCAGTGCCAGAATCTTAGTCGAGTCCCACTCCGAA  
ATGCAGAAGGTATTTAGCCAGCAAGCTCAAAGGGATTTCGTTATTGTCACCATAAAACTCTGCTCG

>TCONS\_00048660

CGAGCAGAGTTTTATGGTGACAATAACGAATCCCTTTTGAGCTTGCTGGCTGAAATACCTTCTGCATTTCCGA  
GTGGGACTCGACTAAGATTCTGGCACTGGCAGCAGTTACTTTATTTCAGTCATGCATGCAAAATTAGAGATCAG  
GTTGGCAGACATTGAAAAGTCTCTTCTTGTAGCCCAATCGTCAGCTACATCACCTCGAGGCAATCACCAGAG  
CCTGCTAGTGGGTAAACATGGGAGTACTGTAC

>TCONS\_00048749

TAAGGATGGTAGACCACTGGATGTTGATTCTGCCAATGCGATCGTCCTTGACACCAACAGTGGCCATGAACG  
AGTACCACAAACATCAAGGATACCTAGTGTTGCTGAAAATACTTCACTATCTCAAGGTACTACTCATCTTTAT  
CCTTCGGTGCTACTATTTGAGTTTTCTATTGTTTGAATTTTCTCCTCAAATTTTTTTTATCATTAGAATCT

>TCONS\_00048792

TGTCTGCCTGAGCAACGTTTTCCAAGAAAAGTACTAGGTTCTAACAAAATCTGTAAGTAGACAAGAACTTCCTA  
AAATACGCTCAAGGGGTACAGCTGGAAAATGAGATACTTCGTTCACTGAATTCTTTGTATTCTTCTAATCGAA  
GAGACTGAAGCCCATGTCATCGTCTGACTCCTCTTCTCTTCCACTTTCTTTTCTTCTTCTTCTCCACAGCAGC  
AGGTGCAGCAGCAGCGCCACCTGTAGGTGCAGCAACTGCAACAGCACCACCACCGGCAGGTACTGAAGCCA

ACTTTTCTCTGCCAGCGGCAATCAGCTCAGTGATATCTTTGCCCTCAACTTGAGAGAGCAGCAGTTCAATCCT  
ATCATCATCAGCCTCAGCCCCAACAGATCCAAGGATGTTCTTCAAATCTTTAGCCTTAGGGCAGGAGTTGCCA  
CCCAATACGGCCAACAAGTAAGCTGCGATTACCTTCATTTCTCTTCTCTGTTAAAAA

>TCONS\_00049045

GAGTATGATATTTGATCTGTTTCTGAAGGAAGGAGTAAGAACCAGAAGCACTCATTAAATTTACATCATTATAG  
TCGTGTAAATTAACCTATTACAAGCTGAGCAATTTCAATGTGACTGGAAAACCTCAGGCATATTTTGACAAAG  
TTGATGAGACACTGAAACCACAGTCAAGTGTCTTACAAAAATTTGAAAACACCATATAGTCAGGGACTAAAA  
TATGCTGAAGCATTCTAATCATCATCCTCAAGAACACTCCGACGCCTCTGGATAGTTACTTTTGTCTGCTTAGT  
AGTTTGGGTGTTAATTTGTTCAAGTAATTGTATCAGTTTCTCCTCCGAAACCTTTTCCGTGATCTGCCCCATTG  
GGCAGCTCTGAGTACAACATCTTCAACTCCTCTGGCCTTTTTCAGGCTTAACAAGAGCAATTTCGAGCAAGCCTT  
GCCCTTGCTTCAGAAGTCAGAATCTGAGTAAGCATCATTTGCCTTCGTTTCATCAGCTTCCCTTTTGGCTTCCTCC  
TGGGCGCTTTGCTTGTCTGAGCTTTGAGGAGTTCCCATGCCCTGTTGAGCCATGAGCTCCTGCATTCTCCTTTGC  
CTGATTGCCTCTAATTCTGGGTCAGCCATCTTTCAATGCTGAATTTGAGCAGGGAATCTCAGGGAAAAGGAAT  
GCAAGAAAATAAAAAACACGGCGTTTGTGACGCGAGAAAAGGCCACCCTGG

>TCONS\_00049186

TGACAGCATCTTGAGGGGAAACAAAATCAATGTAACCTTGGATATTGCGTCCAACCTATGGAAGCCAGTTAAA  
ATTGATTGATTTACAGAACAATTACATCGATTCAATTTACAGAAAGACCTGGATATCGTTTTCAAATAATACTT  
ATGCATAATCCAGTTTGTCAAGAAGGAGGATCAGAAAACCTATTGTGGCAACCCCCAAGAGAACTTTGGATAT  
TCAACCCCATAGATAATTGCTTCAGAACTCAATGCAGTTCTGATCAAATTCCC

>TCONS\_00049202

GGAATTTGATCAGAACTGCATTGAGTTCTGAAGCAATTATCTTATGGGGTTGAATATCCAAAGTTCTCTTGGG  
GGTTGCCACAATAGTTTTCTGATCCTCCTTCTTGACAACTGGATTATGCATAAGTATTATTTGAAAACGATAT  
CCAGGTCTTTCTGTAAATGAATCGATGTAATTGTTCTGTAAATCAATCAATTTTAACTGGCTTCCATAGTTGGA  
CGCAATATCCAAGGTTACATTGATTTTGTCTCCCTCAAG

>TCONS\_00049234

TTTCGCGATTCATAGGTAAATCGATTTTGATTCTCTATTAACCAATAATGTGGAACCTATTAACATGGTTAAAC  
AACTGTTTGAAGTCTAGACGCAGCATGGTACTCTTTCTACCACTATGTTAATATAGAGGTGGTTTCAAATA  
AATATTTTATCGATATAGGATACTCATATTGATAAAATGATTTGAACCGCGTAT

>TCONS\_00049257

CCAGGGGTGGTCTGATAACATCCAGAAGTAGAGGAAGATGGTGGATTTGAACTTAAAGTTGCAGTTCCAGAA  
AAGTCACAGGTTGCACCAGATGCAGCTTTCTTCTGATAATAGCTATTTACAGCATAGCTACAGTGATCTTTAA  
TAGTGTTAGGGTTGTAACAAGGTCCATTTTGAAGAATACCAGTACAATCAGCTCCATTTCCACAAGCATAATC  
TATACTCTTCTGCATAAGGCTATCTCCTACCCCATCTTTGCACAAACAGTAATTAGCACCCTTGAGTAACCA  
GTGAAAGCCAAGAAAACCTATTAAAGACAGTACAAAAGCAGTAGCC

>TCONS\_00049294

GACATTCTTTAAACCAGGCATGTCAAGGTTGTGAACTCCCTCAGTTTAGCAGCTATTGAAGCAGAGATCTCC  
GGATCACGAAGATCCTCAGCAGATAATGTCCTTGAATGAATGAACTCCTCAACTCTACCATTTGGAACTGA  
CCAAGAAGTTTAGGTCTTGACCTTTCTTTGACAAGCACTCAAAAGTTCTAATCTCCTCATCCCTATTGAAGAA  
ACGCTCTACTCCTTCACCATACATGCGAACCAAGACT

>TCONS\_00049409

AACAGCACCTGCACTAGTCTGATAAATAATTTGCATACAGTTTTCCCAAAATCCAAGTCGTTGGTCAGAGGAT  
GCCCCATTGCTACTATTCTCTTGAGCAGCTGTTTTAAGAAATTTCTCTATCTCCCCGCGCCGGGAGAGGGGATT

TCTTGTATATAACCAGCATCCCCGCGCCGATATAATGGTTCCTCAGCTGCAATGCAAGCACATATTATGGTCAG  
CTATCAACCGCAAAACATATTAAGTATTCACTAAAAATTGAGCTGCAAGAGAAGACTGATATTATGTATCCA  
TACAGCAAAATAGACCCCAACCAAGCAAAC

>TCONS\_00049410

ACAACAACCTCGAATTAGAGTACTTTTTAATTATATTCTGCTTCAAGTATGCTTCTTCTCCATTGCAATCCTGCC  
ACTAAGAAATGCCTGTGGAAACATTCTCGAGAACAGTCGGCCTTTTGCTTTGATAAGCAGAGCATATATCCG  
TAACAGGGGATGTGGACCACAGCCAATCCAAGATACCACAAAGGTGCCCATGGAGTGTTAAGTTCCAAGAA  
AGGATACGGCCACCAATTTAAGCAGCACGCGTGTAGAGTCCACTGGAAAACAATATAACAACAGCTCCACA  
GCACAAAATATGTGATACCAACCATGTAAATTG

>TCONS\_00049480

TTGGATATTCTTTTTGGGTTGTTTGAGTAGAGTCTAGAGAAGTAATGAGCAATTTTCTTACAAAGGCTAATTGT  
TACTGATGCATTAAGTAACCATTGCTTCTTCATGGTCCTCGACTGGGCATTTTGATTAGTAGTAAACAGGGTA  
TGTGTTTGAGGTGAGAAATTATCTTTAGCTAGAGAAAGTTGCCTGCTTGATAATCAAGTTTGAGCAGTGCTGT  
ACCATTCTGTAAGCACTTAATAGGTCCAATATATGTTCTCTGCTTTTCTGTATGTAATTGTTTTGTTGATTGA  
TTCTCTGAGTAACACAAGTACTTCTCTTAATGATAATTTTCAGGAAGAGCGAACCCGAGCACACTATAAGCA  
GTTAATAGAGAAAGTGATTCCAGTTGTGGATAAGCGAAAACCACCTCGTGTCTGCGAAGAGTTTGTTCCATG  
CAGTGGTAATGTATCATAGTGCATCAGGCATGAGTTCAAAATGAATTCCTTCTGATATAAGTTCATAATAAAG  
GAGCCTAATCGTGTCTGGGGTAAGTGATATAACATCAAGTCGGTTAATTTAGCAGATGGTTATTCTTTCTGAGT  
GGTAACACTTCCTTTGTGAAGGACAGTATTGTATAGTATCATGTCTGGAAAGTCTATAACGGGATCTTCTATT  
TATCTAGCGGAGGGAGTTCACTTAAGTTAGCACAACTATTTTTGTTGGTTGTTATAGGGGTTTTAGAATGCAAA  
TGCCTGATTTGTTAGATTTGATATGAGTAAATCATGGGAATGAAATTCGGACTAACATTTTGTACTTGTTTGTC  
AATGGCTCGTTATAGCTTGCACTCGCGAGAC

>TCONS\_00049529

TGCAAATGAACTGCAGAAGCTGCTGGATCAGAGTGATAGGAAGAAGCCTAAACAGCACGGTGGCTTTAAAA  
AATGACATGTCGAGTGTAACCTCTATCTAATGCTCAGCTTCTGGAAAAGCTGGGAGAGCTGCTTCTGAAA  
ATGCTGCTGTTCTACCTGTTGAACAACTCAGTGCAGCAGAAATGGAGCGCTGGACTAAGTTACTGCTGAGAA  
AGGCAAATGTAGTTCATTTTTACATGGTTCGGTGTTGCAGAAGATACTTCATAAGCAACTTGTCATTGGAGGT  
GTTCTATCAGAAGCTGAATTTTTGGCTGCAAG

>TCONS\_00049596

CTTTGTTCTTCTTGACGTTCTCCATCTCTTGACTAATGGTCCTAGACTGCGTACTAGGGACATAATGAAGTACT  
ATTTAGACGAGCTCAGTTAAAAGCTCTTGTTTCTATCCACAGTCAAGAGGTCAGTGTTGTATCCTTAATTTGCA  
GTACTAATAAGAGTGCAGAACCAGTAGTTTATTATTTCTAGTTTCTTTAGCATTTTAGAAACCATGATTGTTTA  
ATGGGGAAGTTCTGCAGGCTGGCAAGGGAGGTGAACCTACACATGATGAAACAACAATCATTAGTGGAGCA  
TTAGATTTAACTGAGAAGACTGCTGAGGAGGCCATGACACCCATTGAGTCAACATTTTCATTGGATGTCAATT  
CAAAGCTGGACTGGGAAGCAATGGGTAAAATCTTGCTCGGGGTCATAGCCGAGTTCTAGTCTACTCAGGCA  
GTCCGAAGAATATTATTGGACTTCTAC

>TCONS\_00049757

ATTATATGAACGAGTTCAATCTTTTATACATGATATTTTTTCTAAATGTTGGCTTTATTTTTTTAGAAGAAGTT  
CTGTATCCCAAGACGGGGAGAAGCTTATGTCCTAAAGTCACTAGGAAAGAAATGGAAAGATTACAAGTGCG  
ATTTAAAAGGTGAGTATCTGCCAAAATATAAGACTAAAGACGCTTTGCTGAAAAATAGACCAAGTGCATAGC  
GAGGGATCAATGGAGTGGTCTTGCTCCTATTGGCTTTCAGATAAAGCTAAGGTCCTTGACGCCAACAGTGGC  
CATAAACGAGTACCACAAACATCAAGGATACCTAGTGTTGCTGAAAATACTTCACTGTCTCAAGGT

>TCONS\_00049895

CTGGCAATGATGGTGAAGGATAATATGACCAATTAATCCAGCATAAGCTGTTAGGAAGAACTTAATGGGGT  
CATGAGAGCAAAAATACATGACGTTCTTGTGAGACGGTGATACAAATATTCTTAGTCGCTTCATATGTCTGAA  
GACTTCATTGCTCAGGTGAATGGTATTCTCCTCTGAGTTGGACATCAACGGGATTAGTATGACTTCTATCGCTT  
CTCCGCCCTGTCAAAAATGGATCTTGCAATGGTGGTCTTGCCAATACCACCCATCCCTGAAATCCCGATAAAT  
CGAACATCTTCACATTTTCATCATCAACATCGAGCTTACAGCCCGAATTTGTGATTCTGCTCCAAGTAGAGTGC  
CACTGATCATTGACTTCTGGCACAGATCATTAG

>TCONS\_00049921

ATAAAACAAGGGCTCAAGTCAACAGTAGACAACATCTCAGCTCTCTCCCCTAAACTCAAATTGGGAGACTTT  
TGCCACAATAGATGAAGTAATTCCATTGGCATTCTTCCCAACAAGCAGTGCCCTTCAAGATTCAATGGAATA  
AAGATGTATCCAAATGATCTCTAGCAAGTTCAGCAAAGCTGATAAACAAGAGGACAAGAGAGCCAGCCCTT  
ATTCAGCTGAAAGTTTATCCATTTTCGGGGAGAAAGAATTTTGCTTGAGCTCGATTTATTCCATCAACTCCAGT  
GAAAGAAGTTGATATGCATGCCCGCCTAAATTGATAGACAGCAGAATG

>TCONS\_00049950

TAGCAGATAAAACGGCCTTAGATTATTGCGTTAAACATATTGCACTTATCAGATCCCATTACAGAGGAAGTTC  
ACCGCTGTCTGCAATGACAACCTTTGCTTTTTGGTGTTCACCTTTGTCTTCCTTCAGCTTCAATCTTGTAACGAC  
ATCCATTCCAGACAACACCTTCCCAAAGACAACATGCCGGCCATCCAACCAGCTAGTTGTGACAGTTGTGAT  
GAAGAATTGTGAACCATTGGTGTCTGGGACCAGCATTGTCATTGACAAAAGCCCTGGTCCAGTGTGCTTGATC  
TTGAAATTTTCATCAGCAAATTTTTACCATAAATGGATTACCTCCACGCCCATCACCAAGAGTGAAATCAC  
CACCTTGAAGCATGAAACTGGGGATTATTCTATGGAATGTGCTCCCCTTGTAATGAAGAGGCTTGCCACTCTT  
TCCAACACCTTTTTCCCCTGTGCACAATGCTCTGAAGTTCTCTGCTGTTTTAGGAAGTGTTCACAAAGAGAC  
CCATAACAATACGACCGGCAGGTTTACCATCTATCTCAACGTCAAAGAAAACCTTTGTGAGTTACTTCTTTCAG  
ACTTTCCTGAGATTTGGCCTGCAGAGGATGCTTTCAGTCAATAGTAATAAAAGACTTTCTCCCCCTATTTGTC  
ACAAAGACAAGAGCACACATATGCACACACATGGACATTGGCCCCACATAAACCAGGAAAGAGGAATGCC  
TAGGCCACCTTTTGAAATATGCCAAGTCATAAGTCCATGTTAGACCCAAAGGAAAATAGGAAAAAAAAG

>TCONS\_00050362

TCTCTCTCATCTTTAGTCTCCCTTTCTCCTGAAAGAACAACCCTCGGTGAGTCTAGCACGGCCACCAGTCGG  
CTGGCACAACACAGTCTGGCAGTTCCCGCACACCACCACAGTTTGCGAGTGACTGAACACAGTTGTTATGTTA  
AAGCAACCCTGGCACTTAACATCCATAAAGAAAGAGTTAGGAGACTGAACAAGACGCTTGAGTTTGTGCTTC  
CTCTTCTCCAGCTCGGCAGGAGGGTTCAACAAGTCGACATCATTGG

>TCONS\_00050367

TTGAGAGTTGACCAGAAAACGCGGGAGTCCACGGGTATTTCCGTACCCGATTCCGACCCGACCCAATTAAT  
TACCCATTTCTTTCTTTCAGCATTCTACCAGAGGCAGACGCTCTTCTTCTTCTGCTCTCAATAGTCTTTTTT  
CACATATCACACACCACCAATAATTCCTACTCAAAAGTGCCCTAAAACCTATAAGCTTTGTGTATACATAAA  
TACGATCTTTATGTATTTATATTTTCTGGGTATTTTCTATTTATAGGAATTAGGCTTTCTTCTACAGGCAAACCTCT  
CAATGGATGATCATGATGACGATTGGGAAATTCTGCTCTCTGCTTTAAAGGATATGTCTCTATGTGCTGTCAA  
GGTGCGAACGAATATGGCTACACATGTCATCGTGCAACATGAAAGTATACTAAAAATATCCTTCACTTCCTTT  
ATTCCAATTTATCAGCTTTACATAGTCAGGTTAAGTGTAGGAGTTATTGACTTTTCATAGCTGATTGTAAGAGA  
ATAGCAAATCAAGTTTCGTAGTTGTTCTTTATAGTCAATTGGGAAGATACTATAGAAATTTCTGCGTTGAGTGA  
GTCTGGATTAGTGAGCTTGATATTTGTTTATATAGTGAAGTGAATGCAGTAGCTTCTCAATTTTGCTCTGTGTG  
TTGTCTAATTCATAACTTCTAACATCTTCATCAATCATTATGCTTAATGAAAGATAGTGGCAGATGCCTTCCTT  
TTTATAATTAAATATTATTAAGAAAGCGACACTTCGGTACCGTTGCTGCTTCCAA

>TCONS\_00050387

AAGAGGGAAACAAAGAAAGAGAAATAGCACGCTGAAGTCACTTTAATTGAAAGAATTGTGTTAAAGCATGT  
TAACCGGACATATCTTTGCATAGGCAACCACAGCAGGGAGCAAGTCAACTACAAGGTGAACACTGCTTTAAC  
TCCAACCAACAGCTTCTAGCTGCTAATAACTTAATCATCATATTTTCGTGGAGCATCTTCAAAGAGCTTCTGTGC  
CAGTATCCAAATAATGGAAAAGAAGCACTGATGTTTCAGTTTCATAAATAGTCTTCGAGTATGGTGGAGAGCA  
ATAGTCCTTTTCACAAATTCAGATCTCTGGAACCTTCTCTTCCTGATCCTTGTCATTGAAGGAAACGGTTGGGAC  
CTTCTTTCACTAACATGGTCATCTAGGCTGTTTACAGATGAACCTTGCTTCAGCTGAAGTGCAGGATTGTCTTGT  
ATGAAGTCTTTTGAAGGCTGCTGATTGCCGACAAATGATAACAGTAACTGGTTGGTTGCCGTATTAGAGGAA  
GGAGTGACATGGCTGGATTCTTTTCCAATAAGCACTCAGCAACTCTTTCCTCAGTAAGGATAAGGCTGAGA  
AAGATCCACCATTTTGAAGTTTCTTTTGTCTGAGAGCTTAAGGTTTGTTAAGGTAAATCAAC

>TCONS\_00050476

AGACTCCACCCCACTACTTTGGAAGCTTTAATGTGTGCTCGCACGTGGTTATGGAATGACTTAAATGGTTTGA  
CTTCAACCGTTGATCAAGTTTCATGTCCAACATTGCTTGATGAAGAGGACGAGCCGATTCAAGTGGTTTATC  
GCAACTATGAGACCTTGACATGCTTACATCCCTTTTGTTCCTCTCAAATTTGGATTGCCACATAGCTACTGTT  
TCAATTTATAGTATCTGTTTTTATTGCTGTTGGTACTATTTGAATTTAAGTATGACTTCGGCCTA

>TCONS\_00050620

ATTACAAATGCATACTGTTTCCACTACTAAAATCACAATCACTCTTCACAAGCAGATCTTAAAAGAACATGAC  
AGTGTTCAAATCTTTCACTCATATACAGAAGAAAATCAAAGATGCAATTTTTTACAAGATACTCGAAAAGAAT  
ACACATTAATCAAGCCAGATAGCATACCGATTGGTCACATCCCGTGAATCAAGTCTTTGACAGACCAAATAT  
GAGGACAAAAGTAGCAAGAACAGCGGCAATGGTGCATGTAATGTATCCTGGTTTCTCTCGAGGATCAATTTG  
TGCACAAAGCAGGACAAAAGCAGCAAGATACCAAGGGATTCCAGCAAGAAAGAAGCCAATTATGAACAGG  
AACCAGCCAAGACCAATACCACAGCAAGGAAGGCGATGCTCTCTTTCAGGTCTTCCCTCAGGATCAGAAACA  
GTATAACCTGGAACAGCCTGATAACCATGAGCATAATATTCAGGTGATGATGCGGTGACGCCAGGTGGAGGA  
ACTGGCTGAGGAAAACCGATCACCGGTTGA

>TCONS\_00050667

GGGCACTAGGTTTCCTTTCTATTTGATCCGTGATTAGGAAGCTAAACTATATCATTGAGAGGAAAACACGAAC  
TAAACACTGGGAACTATATAAACTATCCTTTTCCTTTTCATTTGTTTTTAATTGAATCAGAAAAAATAAACCAT  
ATAGTTCAGCAGAGCTGGAACCAAATAAGTACAATGCTTTTACAAGAGTTGATGAGGTACCACCCTCTTGTG  
CTCTTCTCCTTCTCCTTTTCAAAGACTTGTTTTCCGTATGCCTCCACGTTCTATATAAGAACCTTGTTCTGTCTGT  
TAGCGTAAGAAGAAGAGGAAGGAACACGCTTGTTCTTAAACATCATATAAGCAAGCGGCAATACAACCTCCG  
ATCATCATTACAGCTGCTCCCATCATATACCTCATTGGGCTCGGCGCTTCCACTTCTAGTACTGTCATC

>TCONS\_00050668

AACTATATCATTGAGAGGAAAACACGAACCTAAACACTGGGAACTATATAAACTATCCTTTTCCTTTTCATTTG  
TTTTTAATTGAATCAGAAAAAATAAACCATATAGTTCAGCAGAGCTGGAACCAAATAAGTACAATGCTTTTA  
CAAGAGTTGATGAGGTACCACCCTCTTGTGCTCTTCTCCTTCTCCTTTTCAAAGACTTGTTTTCCGTATGCCTCC  
ACGTTCTATATAAGAACCTTGTTCTACGTCTGTTTAGCGTAAGAAGAAGAGGAAGGAACACGCTTGTTCTTA  
AACATCATATAAGCAAGCGGCAATACAACCTCCGATCATCATTACAGCTGCTCCCATCATATACCTCATTGGGC  
TCGGCGCTTCCACTTCTAGTACTGTCATC

>TCONS\_00050681

GCAGATGACAGTACTAGAAGTGGAAGCGCCGAGCCCAATGAGGTATATGATGGGAGCAGCTGTAATGATGA  
TCGGAGTTGTATTGCCGCTTGCTTATATGATGTTTAGGAACAAGCGTGTTCTTCTCTTCTTCTTACGCTAAAC  
AGACGTAGGAACAAGGTTCTTATATAGAACGTGGAGGCATACGGAAAACAAGTCTTTGAAAAGGAGAAGGA



GAAGAGCACAAGAGGGTGGTACCTCATCAACTCTTGTAAGCATTGTACTTATTTGGTTCCAGCTCTGCTGA  
ACTATATGGTTTATTTTTTCTGATTCAATTAAAAACAAATGAAAGGAAAAGGATAGTTTATATAGTTTCCCAGT  
GTTTAGTTTCGTGTTTTCTCTCAATGATATAGTTTAGCTTCCTAATCACGGATCAAATAGAAAGGAAACCTAGT  
GCCCC

>TCONS\_00050689

CCCATATTGTCCATAAATTAACTTTTAAATACAAACATGCATAGAGCTCTTATTAATGCGAAAAGACTCTCC  
ATCTAATCAATTATCCATTTGTAATGAAGGACAAGTAAAGACAAGCCACACAATGCAATTTAAATAAATCAT  
TTGACCTCCTTATCAGAAAATAATGTCCTCGTCTTTCTGTGAAGCATGGGATAGCAAGTTATGGGCTGTACCT  
AGCGAAATACCTCTCTTCAAGGAAATTTCTTCTGCAGCCTTCTCCTCTGCATATTGCTTGGAAGCCAGCATCTG  
TCTCTCTACCTCCCTCTTCTTGTAACTTGTATCTTCTTGAGACGAAAGAAATCTTCCCTTTCCAGTTCATCAAG  
TTCCCTTTTGATGTAAAGCACTGTGTTCTCCAACCGTGGCTTCACGACATTCTCCAATGCATTAACCCTCCGAT  
TTGTGGTCTTGATCGCCTCATCAAGAGTCAAGAATGATGTCTGTAGAGAGGCAAGCTCAACAAGCAACTCAA  
TAGATTTACGTAAGCAGCACGGCAAGCTTGACCTGTTGCCCCCTCTAGCTAATCCAGTCAGGTCATTCTTT  
GTCTCTCCTTCAGAGAAATGCTCGAATTTAGGGAGCTTTACACCGGCAATATTGTCTTGGCGGGATCGAACTT  
TAATGGTTGCATTCTGGACATTTTCAAGGACAACATGCTTAATGTTCTCGCCAGCAGCATATTTTGCTCTGTG  
AGAGCGAAGGAGGAAGTTTTCATGACATCTCCCATGATTCTTCTGTTGACACGATGTCCTTTAGAATCTGAC  
GGAAGTGCACAGTTAAAGCATCACTCTTCTTCTTGAGCAGAGCATGGCCTCTTGTAGCACCAACAAGGCGAG  
CTTTGATCACACCAAGCATTGTAAGTGTAGGAACGACATTCAAACGCTGGCTTTGCCCGGACATTTTGCCAAG  
CTACTTTAGAAGTCGAATTCGTGCGAAAGGGAGAGAAAGATCGCGAGGATTCAGACACGAATCAGATGGG  
AGAG

>TCONS\_00050718

CTCAATTTGTCTCTGCTGCTCCTTGACGATCGAGCAACAATTCATGCACCGTATCACTTGAATTGAGTTTCT  
GGAGAAGGGCAGAGAGGTGCTTAGGTTGCTGATTCACAACTTGAAGTGGCCAACTATCCGGTCCAGCAGTTG  
GCTGAGAAACACCATCTACAAATTCGGGCTTCTATTAATCGCTTCTATAAAATTCCTGAAGTGATC

>TCONS\_00050719

CCATAAAGATGCCACAAGAGAGACCATGAAGCTGCCTCGTCAAGCAAAATCCGTGCCTTCTGTCTCATCAAT  
TTGTCCTCCATAACTCTGTGCATTTTATTAGAACCATACCTAATTGATTCTGAGACGTCACGGCAACAATTCTC  
AAAATGTAATATCAAGTCAGGGATAGAAATTAACCCTACAGCACATAGAAACATAAACTGTTAGATATCAAT  
TTTTACATTATTTCC

>TCONS\_00050726

CCATGAATGATGGAAAATAATGTAAAAATTGATATCTAACAGTTTATGTTTCTATGTGCTGTAGGGTTAATTC  
TATCCCTGACTTGATATTACATTTTGAGAATTGTTGCCGTGACGTCTCAGAATCAATTAGGTATGGTTCTAATG  
AAATGCACAGAGTTATGGAGGACAAATTGATGAGACAGAAGGCACGGATTTTGCTTGACGAGGCAGCTTCAT  
GGTCTCTCTTGTGGCATCTTTATGGAAAAGGAAATAAGTCGTCAACCTTTT

>TCONS\_00050785

AAGATGCATAATAAAATGGTGAACATAATGATTGGGGCATATGTAAACCATTTTTCTCTCATCGTCTTCCAGAT  
GCCACTGATTCAGTAGAGAAGAGGTACTTCACACGTGAAAGAACAGAGTCATGAGCAGGATCATATGGATG  
GTCTTTTGAAGGAATCTCCAGAATGGCTGGAATTGGTTTATTGTAGCTATCAACCAAGAATCTGATCATGTTTG  
CGACATATTGGCTGATTAACACTATTGCAATGTCCTCTCTTGTGGTGAATTCTTTAAAAGCATCTTCAATCTGC  
TTCAGTGTGCTTTGAATCGACAATAAGGTAGTTAGTTTCTCCTCAAATCGACATTGCCAACTCCGGCCAA  
TAAAAATCCAGTGATTGTATCTCATCAGCAATCATGGCAATGAGGGCTGAGTTACTTGTTTTGATTGGAGCT  
CGGTTTGCCATCTTAACTGAA

>TCONS\_00050812

ATTAGAAAATATAACCCACAAAAGCGCTTTAAATGAGTTTAAAAAGGCATCGCGGTAAGTTTAAGTCATCCA  
CGTCGTCAATCATGTCAAATTACGAGAAGTAGAATATGCAGTAGTATAAACAAATGATAATACCAGCTACAA  
GATCAGGAAGTGAAAAGACAGAAGCAGTGTTCTGCTTCTAAATATTTATGCACACTTCAGGCTGCTTCAGATT  
GCACAATAAAATCAACAATTATTACCAAAATTTACAAATTTGGGTGATTTATTGCAACCTTGCATAATCCTTA  
TTATCAACTTCTATGCCACCCAAAGCCCTACAAATAAATATATCAATAGACACGTGCCTTAGGTGGGAATGT  
CTCGACCTCGTCATCTAGAGTGTTTCATATGAACTGGTCTGTACTCTAGCCGGACCTTCTCATTCTCCCAATATC  
CTAGTGTATGTTTCATCCACTTCTCATCATCTCTTTTCGTAAAATCTTCACGAGCATGAGCTCCTCTGCTTTCTTT  
TCTAGCCTCGGCTGAGTGCATGGTGTATGCATGCATTGATCAAAAGGTTTTCCAGCTCAATAGTCTCTATAAGA  
TCTGAGTTCCATATTAACTTCTATCCTTCAACTGAACATCATGGAACTCTCCCATGTTTTGTCAATGAGCTG  
GCAACCTTCCTCTAGTGTTTCTTGTGTGCGGAACACAGCAGCATTGTTTTGCATAACTCTCTGCATATTCAGCC  
GAATCTTTGATGTAGGCAGTGAACCATTGAGTTCCTAATCTTGTCCAACCATGCAATGGTCCTCTCTCCCGCA  
TCCTTCTCAAGTGGCTTCTGGTTCTCTCCTGGTCTTTGGATTTTCAGCAACCCTATTAGCACATGCCCGCCAAA  
AACAAACAATATCTAGAAGAGAATTTGCACCAAGACGATTGGCACCATGAACTGATGCACATGCTGCTTCACC  
AGCAGCCATCAGTCCAGGAACACGGCATCAGGATTATCTCCTTTAATAGTGACCACCTCTCCATGGTAATTT  
GTGGGAATTCTCCCATATTATAATGCACGGTAGGTAAAACGGGAATTGGCTCCTTAGTTACATCAACACCAG  
CAAAAATTGCAGCTGTTTCAGAGATACCAGGAAGTCTCTCCTTAAGGACCTCTGGAGGTAAGTGATTGAGGT  
GAAGATAGATATGATCCTTCAATGGTCCTACACCACGCCCTTCTCGAATTTCCATTGTCATAGATCTGGAAAC  
AACATCTCTTGACGCAAGATCCTTGGCTGTTGGGGCATACCTTTCCATAAATCGCTCACCTCACTATTCTCTCA  
GAATACCACCTTCACCACGAGATCCTTCAGTAATGAGACAACCAGCTCCATATATACCAGTTGGATGAAACT  
GCACAAACTCAAGATCCTCAAGAGGAAGCCCAGCACGCGGACCATAGCATTACCATCTCCGGTGCAAGTA  
TGAGCAGATGTTGCAGAGAAGTAAGCTCGACCATAACCCCTGTGGCCAAAATAGTAGAGGCAGCACGGAA  
CCGATGCAAGGTACCATCCTCCATATTTAGTGCTATTACACCTTGGCAGCTCCCATCACTGTTTCATTAGTAAAT  
CCAAAGCAAAATATTCCACGAAAAACTGTGTATTATGCTTCATGGCCTGCCATAAAGAGTATGCAATAGAG  
CATGCCCAGTCCGATCGGCAGCACAAGCACAACGATATGCTTGTCTCCTTTTCCAAAGTCTAGGCTTTGACC  
ACCAAATGCACGTTGATATATTTTACCATCTTCAGTTCGAGAGAAAGGCAAACCATAATTCTCAAGCTCTATA  
ACTGCTTTGGGCGCTTCTCTACACATGTATTGGATAGCATCCTGATCACCTAACCAATCACTTCCTTTAACTGT  
ATCATACATGTGCCACCTCCAATCGTCCTCTGTCATATTGCCTAATGCTGCATTTATACCGCCCTGAGCTGCAA  
CGGTGTGAGATCGAGTAGGAAAGAGCTTGGTTATGCAAGCAGTATTGAATCCATGCTCAGACAACCCTATTG  
CCGCTCGAAGCCCTGCACCACCTGCACCTACCACCACTGCATCGTATGTGTGAT

>TCONS\_00050967

GAGTACTGACTTATCAGAGTTAACTGAGATGACAATCTAAAAGAACCAGGTCGTAGAGTCACTTGCTGCAG  
CTCCATTCAGCCATGTCTGATGTACGTGTGTCCAAGTGAGTCCATCTGCGACAGTCTTATTCTTTGAACTTAAT  
AGGACTGTAGTTATGCAACATCGCCTGTCTTCACCAGAGAGCTCCCACTTCTTGAAACTACCAACCATGAGT  
CTGAACCAACCTGTACAGGTAAAACCTTGATCGACCCAAATACGAAATTGTTTCCCCTGTTTGTGCGCCATGACA  
TGTCTGAATAAAGTTACACATTCCTGAAGGGATTTCTCAACACCAGATGGGTGGACAAAAGTAC

>TCONS\_00050968

CACTGCTTTTCAAGTTTGACAGGTAATGCTCAGAATGCTCAATTTCTCTACGCCTCCATTTCTCGAAAAACAGGT  
AAAATTTGACAACTTCATAGGCAGGAACAAAGTTCTCCATCTTGCAGTCTGACATATCCATAACATCTCTAGG  
GAAGGTACTTGGACCTAGGTTGAAATGACCAATAGCTTGTATGATGCCGGCAGCACACCTCTCTGTTGCATGA  
ATTACTTTAGGATTATTCTTCGCATTTGCAGCATGCCATTGCAATAATTCCTCCTGTGCATTAGCAATCATTAC  
ACCATACACATCCGGGATACTGAATAGCTCAGCATCATTCCCGGAGTCACCGCAGGCAAGGGTGTGTTGTTGG

TAATTTTCCCTCACTCTTCAACTTCTTTTACAGATAAGCAAGTGCTTGTCTTTCCCAGCACCTTGTGGTAATAT  
 ATCCAGATCCATCCCTCCACTGTAAATTATTTTGACATCCAGCCCACGTTCTTCCAAGCGCTTGAAAGAGTTT  
 TCATTACATCTTGTGCTTTGTCTTTCTGAACATAGAACTGACCTTGTGTGGTCGCTGCTCTGTCTCTGACTGTA  
 GAGTGAGTTCAGGAACTTGCTAGTCTCCTCTGTACTATCTTTCTGTCCCACTTGTATTTAGTAAAGCTTCCC  
 AACCATCATCAGGCACCATCGAGTTACCATATGTTATTTAGTTCCCACGGACATAATAGTAATATCTGGGGT  
 TAGCATGGGCTTTTCTTTCTCAACTCCTTGTAAGGTGTAGGTGATCTCCAGTTGAGAACACTAACAAAGAG  
 TTATCACGATAATTGGCCTCCCATAAGGCATTAAATCTGAGCAGAGAAAGGTTCTCGGCATCATGATGATCTA  
 CCATTGTATGGTCTAGATCTGAGACTATCATGAGACGTGCAGCACTGGTTAGCCGATCCATGAGTGATGTAAA  
 TTAGCTTCGCTCTGAAA

>TCONS\_00051173

TTAACTGTTGAGGTTCAATGATTAAACAACCCAAAATAAGGTCTTTGGTTTACCATTGGGACCCGGGTTGAGGTA  
 CACGTGTTGAAGAGTTACTGGGCTAGAGGAAATATAGTTCTTATAATTATCAGATTGTGCGAGGGAGAAGGC  
 ATGCGTATTGTGAAGAAAAGTGTCTGCTTCTCTCGTCCCCCTTTCTCTGAGTCTAAGTTCTCATCCCCCTCTTA  
 TCTT

>TCONS\_00051223

CAATGAAAATTACAAAGGTAGTAATTTACTCAAACCTGGTCTGGCTGAGTTGCGTGTTTGGTCTTTGTGACCTT  
 TAAGCTGGCCTTATATTCACCATAGAAATAAGAGGCGAAACCCCAAAGACACATAGCTAAAGCCATCCACTT  
 TTCTGCATTGAAGCTTTCAGGTAAGAACATAACAGCAAAGATCTGTTGTACTGGAAGTGAAGGAGTTAAAT  
 ATCCCTGACAATAGAGCTGAGGAGCTGAAGATCAGCCCAAGATTTCCAATAATCATAATTTGCAAAGCTATT  
 GCTGATAGTGCTAATATCATATAATACTTGTCTGCCCCAGTCCAAATTCTTCAGCCTCTCTATGGATGGCCTG  
 AAAATCTTCGTTTATAATCATGGCGACGACACAAAACAAAGTGGAGAAGATGCATATAAGAAACTGCATTT  
 GCATGACAAGATCAAACGTAACAGCAACTCCAGCTTTGATATGGCTATACTCCACCCTGCATTTACAAATCC  
 ATGAGAGCAGCACCAACAATTGTCATGACAAACCCTAAAACGTATTGACGATTGACTCTCCTTTAGGCCTAT  
 CTCCATTATGTGCAGCCCTGCTATTTGGCCAACTGCCATGAAGATGGAGTTGATGACAACAAGCAGTGTTTT  
 GATTGACATGAAATTCTTGA

>TCONS\_00051224

CAATGAAAATTACAAAGGTAGTAATTTACTCAAACCTGGTCTGGCTGAGTTGCGTGTTTGGTCTTTGTGACCTT  
 TAAGCTGGCCTTATATTCACCATAGAAATAAGAGGCGAAACCCCAAAGACACATAGCTAAAGCCATCCACTT  
 TTCTGCATTGAAGCTTTCAGGTAAGAACATAACAGCAAAGATCTGTTGTACTGGAAGTGAAGGAGTTAAAT  
 ATCCCTGACAATAGAGCTGAGGAGCTGAAGATCAGCCCAAGATTTCCAATAATCATAATTTGCAAAGCTATT  
 GCTGATAGTGCTAATATCATATAATACTTGTCTGCCCCAGTCCAAATTCTTCAGCCTCTCTATGGATGGCCTG  
 AAAATCTTCGTTTATAATCATGGCGACGACACAAAACAAAGTGGAGAAGATGCATATAAGAAACTGCATTT  
 GCATGACAAGATCAAACGTAACAGCAACTCCAGCTTTGATATGGCTATACTCCACCCTGCATTTACAAATCC  
 ATGAGAGCAGCACCAACAATTGTCATGACAAACCCTAAAACGTATTGACGATTGACTCTCCTTTAGGCCTAT  
 CTCCATTATGTGCAGCCCTAATATGATTGATCCAAATGTCATCAAAACCACAGCATTATAGAATAATGTGT  
 GAACTTATGTTTCACCATAAAATACGCGAAAATCGCCGTGAAAGACAGTGATGTTGAAGCGAGGAGGGAGG  
 AAATTGAAACAGGAAGATAAGACATGCCGAAAGTGTAGAGGTAGCTACAAACACCAAGGAGACCTAAAAT  
 AGCACTGGCTAATATTAGTTTTGGTGTGAGTAAAACCTCTATTAGTTTCTGTTTTAGCTTTTCTTCTTTTGCATAA  
 GAAATGACAATTGGCAAAACCAAGATTGGAAACCCTGCTGTAAGCAAAAAAGCTTGCAACCATTTCCTTTTT  
 CCACCATGCAAAAAGTAAATCCTAACAAAGCATAACACCTGCTATTTGGCCAACTGCCATGAAGATGGAGTTG  
 ATGACAACAAGCAGTGTTTTGATTGACATGAAATTCTTGA

>TCONS\_00051229

TATCGTATTTTAAGCAGTTGCTTGAGATTTTTCAGATTCTGCTGTTGTTTCCACTGCTCTGGAGTTACAGCTTT  
CGTAATAGAGAGAGCATGGATTTCTTCATCTCCTCAGCTAGTGCACCATTAACCAGTCGGTGCCTCTCCAGC  
AATCTTTTGCCTTCAAATTGTTTCAGTCACAATGACAATCGAGAATTTTGCACCACATCCCCCAGATGTATCAAT  
CACTTCCAGATGAGAAGGGTTTAGCTTTGCCGTTAATGAAGATTCAACCTGCTCCTTTGTACACCCCATGATC  
CAACCCTCTCT

>TCONS\_00051230

TGCACCTTAGAAATAGGCAGTTCAAGATTCATGAGGTCCTAATCAATTACATAAACTTACGAAACTCCGGG  
TACAATAGCAAATGCTAGAATGATCACAAGGATTTCAAATTAGTAGTCTTTTGCTTCGAAAACCAGATTGTT  
ACACAGACCACCTCAACCTTTCCCCAGTAATAGTCTATTGAGTCAACTGAAGCACCTTAAACAAAATATAGC  
GTGATTGCAGATTTAGATACACACTTATGACCAGCACAGCTTTTCTCCTGATCAAACAGTCCGCAGTGGAGGA  
GACACCAGTATTACACCATCTCCACGAACAAATAGGAAAGGGACGGTCCGTCTTGTCGTCCGAACTATCTCTT  
CATATGTTTCATCATCAATCTCGACTGTGGTCACAATTTCTTCAACATCACCAAGAATCATATTAAGATGCTGA  
TCATAAGCATGAAGTTTGCCGCGGAGTTCTCTATCGGAACGGAGTTTAACGTAGATTCTCTCGTCGAGACTGA  
GCCTTATGAGATCCAATGGCTCCTTCACTGCACTCTCCTCTTCACTTCCCATTGC

>TCONS\_00051245

CATGCTCTGTTTCAATAGTTTTTGGTCATGCACCATGGCTTCTCGATTTTTCCGCTCCTCCTCAAGCTGAATCTT  
TACTTCCTTTAGCTGGCATTCTACACTTTCTCTTTTACGGCGTTCTTCTTCCACCTCTTTTTGTTGTGCTTGCAGTT  
TCTCTGAATTCCATTCATGGATCTCCTACTTGTTGAATTAACCTCCCGATCCTTGACCACGGCAATAACTTGAC  
GTTTCTCCAACAACCTTTCACAAATGCAGCATTAAACAATCGGGTCCAAATCAGTATCCTCTTCAATTTCTTGAAT  
TTGTTTCAGCAACATATTCATTCACCTTATCATTTACTTCAGCAGAGGCATCATTAACCCAATGTCCGTTCTTCA  
TGTGAGTCAATTCCCAAAG

>TCONS\_00051313

GAATTTAGCCAGGGAATCGAATGTGAGCTCTCTTCCATAGAAGGTAGAGTACAATGATTTAAACAGACTAGT  
AGAGACAGCAAAAACAGGCAAGTGCTGAAGATCAGGGTCATAATCTAGACTATTGCAGGGCCACATGATGGG  
CGTTGTGTGTCCAATTCCACCAAGCAATACTAATCCCAGTAATGCAATTCCCTGCTAGAATTTGTACCAATTTG  
TTGAAACCACGAGTTGTCATGATTAAATAATGACCAGAATCATGACCCAAGTAAGAAACCTGCATCCAAGCC  
AACCCTAATAACCCCCCACAAGCATACGAATCCAGAACTATTACTATAAAGAACACCATAAACAGTCAA  
GAAAAGCAAAAATGCTACAAAACATAAGGAATAAATCACCCCATGACCTTTCTCTTCAAACAAACCA

>TCONS\_00051314

ATTAATTAGCCATGAGTATTAACAGCTTCCCAGAGCAGATTCTAGCTTGCAATTGCCGCTACCCTAAGTGTCC  
TTATTGTCCACCTATTGGCCTCAAAGAAAGACAACTCCTGTAGGGCAAATTGTGCTTCTTGCATAGATCCTG  
TACAATAGGAGAAATTTTCTCAATTGGCACCTAGGCAGCCTTGGGAAGAGATGATGCTCAAGCTGGAAGT  
CAATCCTCCAAAGAACCAATCCATCTGAGGAGACAAGCAATGTCAATAGTCCCGGCTGTTTGTCTCGAA  
CCAATCGTTCCCCTTGGGTTGTCCAACATAGACATCTGCAGCAAAATGGTTCAGACAGAATTGAACGTGTTGA  
ATCCCTGTCACAGCAAAGCTTATGAGGACAAATAACACCCTCTCTGTCCAATTAGGCAAGGTGGAAACAAGA  
AGCGGAAACCAAGTCCAGAAAACCATGATCCCCAATATGTTTATAAGTCTATTACTCACTTTTCTCCTTGAGA  
ACAATAGCAACAATGTCTGGATAAACAGATTACCCCTCGAAACACAGACAATCGGATAGAACGTAAAATGT  
TGATAGCTGACGAAGAATTTAGCCAGGGAATCGAATGTGAGCTCTCTTCCATAGAAGGTAGAGTACAATGAT  
TTAAACAGACTAGTAGAGACAGCAAAAACAGGCAAGTGCTGAAGATCAGGGTCATAATCTAGACTATTGCA  
GGCCACATGATGGGCGTTGTGTGTCCAATTCCACCAAGCAATACTAATCCAGTAATGCAATTCCTTGCTAGA  
ATTTGTACCAATTTGTTGAAACCACGAGTTGTCATGATTAAATAATGACCAGAATCATGACCCAAGTAAGAA  
ACCTGCATCCAAGCCAACCCTAATAACCCCCCACAAGCATACGAATCCAGAACTATTACTATAAAGAAC

ACCATAAACAGTCAAGAAAAGCAAAAATGCTACAAAACATAAGGAATAAATCACCCCATGACCTTTCTCTT  
CAAACAAACCA

>TCONS\_00051327

TGCGACTGCGACTGCGACTGCTGCCTTCTTCCTCAGGTTAGTGCTGCCTTCTTCTTCGGTTACAAGTATTTCTGT  
TTTGAACGATTTGTTCTCTTGTTTTGAATACAAGCAGTGACATTTTCGGCTAAATCATTCTCTTGTTTTGAATAC  
AAGTATTTTCGGCTACAAGCAGTGACATTTTCGGCTACAATTTTATCTTGTTTTTTCTATTTCTGTTGCTCTTTGT  
TTTGAATGATTTATTCTCTGTTTGA

>TCONS\_00051434

CCCCAGAAAGGTCAGCGTTCCCTAAAAGACGGTTTCTATCATTAAAGTCATACCATCCTCAGCTGTTGACATTA  
GATATATCTTCTATTATCCCTTTACCATCCATGGCATCAAAGAAGAAAAAGTTCTTAAGAGGATCTCCTTTGCC  
AGATATTGCTTTTATCACCTCCTGTCCAAGAATTCTCCCATGATTGCGCAGACAGGAGGAAATTCGCTTCTA  
CTTGCTATCAATCTTTGCAGAAGAGAATCTGGGATCTGAGATTCGTTTAAGCAATGTGCCTCACAGAGTTCTT  
TTCTCATCTTCTGAACATTTGGAAGGTCATCAGCAGAAGTTTCTCCAGGATTCGGGCCCTCAAGCTCTTCAAAC  
CTTTCTATAACTCTCATTGCAAAGTATAGCTTTGACATCCTCTTGGGTAGTGATCTCCAGGGGACTGCAATGGC  
TTCTCAAACCTTGATACTGCAATGTGCATTCCATT

>TCONS\_00051447

TTGAGTAATGCTACTTTTTTTCAGGCTGCAATTGGGACAAATGGGAACAGAAGGTGAACAATTGACGGAGCAG  
GAAACGGCCATTTATGATCGTCAAATTAGGGTTTGGGGTGTTGATGCTCAGAGAAGTTCTGCAAGAATATTGT  
TTTAGCTGGAGTAGGTAGTTTGACGCTAAATGATGATCGCTTGTTAACAGAAGAGCTATTATTAGCTAATTTCT  
TTAATTCCTCGCGATGAAAATGTATTCCTGGGAAGTCCATTGCTGAGCTTTGCTGTGATTCATTGAAGGATTT  
CAACCCTATGGTTTCTGTTTCGGCGCTCTCTCCAATTTTGACGCTGATTTCTTTCAGAAGTTTGATGTAGTTGTT  
GTTAGCTGTTGCTCCCTTTTGACGAAAAAATCAGTAAATGCTAAGTGTCACAAGTCGCCAAAGCGTGTTGCAT  
TTTACAGCGTAGAATGCCGAGACTCCTGTGGTGAGATATTTGTTGACTTGCAGAATTACAGCTACTGTAAGGT  
TATAACCAACTCATTTCTTTGTTTATTCCTCTTTATTCTGCTGGATTATATCCTTTTCTCTCTT

>TCONS\_00051473

TGATTCCCCCCTTACCTTAGCCAAAATTTCCACATTGTAGCAGAAATTACATCAAAAGGCTTCACTTTAGCTG  
ATTGTTTAGGTCCAAAAATCTTGGAATGTGTTGGTTTAGTTGCTTTTCTGTAATGTGAAAAGAATGTGATATC  
ATTTTGCAAGTGTTGGTGATTCTCCAATGATCACCAACAGGATCAACCCTCTTAGAGAAAATGGCAAATTCT  
CAACTGTAGATAATAATGGATTGATGAATTTATTGGTTCTTGAGTTGTTAAGAGACTGAGGTGGGAGTTGATG  
ACCAGCCATGATTTGTGCCACATGTTGATAAAAATTTGAAGCTGAAAATACATCTCCAAGAACATGAGCCCA  
GCTTAGCCCTATTGACATCCCTCCACATTTGAACCAAGTGAAGTGAATGAACACAAGAGGTGCAAAGCCCAA  
CTCAGGACCAAGAACTTGATCATAAACAAGCTGATCATTAACAGAAGAATCATTCATAGCCAGCCACTCCTC  
AATTGTTTTGCTACTCTTAGCTTCGATAATCCTAACACCACCGTCATTACACTTTATGAACGGCCGGCCACCGC  
CGTCCTCCGACCTCCTAATCCTGCCGGAAGTCTCATAATATAGCTCAAGAAAATGAAACATGGGTTTTTTAAA  
GTCATTTATATTCAAACCTTCAACTGCATCACTGTTGAAAAAATAAAGACCCTTAATGTAATGCAACTTCATG  
ACTAAGTCCATGTTAGTAAGTTCATGAACCTTATCCGCTC

>TCONS\_00051727

GATGAGATTAGTAATCTCGTCTTGAAACTACAAGCTTTGTTGCCAGATTCCTCTTCAAGATGCACTTCCGAGGT  
ACCAGCCTCGAAGACATTGGAAGAGACGTGTAATTATATCAAAATGCTGCACAGTGAGGTTGATGATCTCAG  
TGAGAAGCTCTCTCAAAAAGTCTTCCACAGACTCCATATTAATGCCGTTGATCGAGACACTCAGAC

>TCONS\_00051734

TGTTTCCCCGCATAGAAAGCACCTTGAACACAGTGGAATCCCTCTCTTTTTGAGATTGTCTTGGGTCAAGACA  
 ACCTCCTTTGCTAGCAGCCAAGTAAACAAGCTACCTTATATGAAACTTTTACTTTCCAAATATGCTTCCAAG  
 GCCAATTAGTTAATTGCTGATTTGAATGGTTTAAGAGCTTATAGGCTGAACCTTACCTTATACATACCTTTGTTG  
 TGTCCCTGCCACCATAGTGTATCCACCCCACTCTGTAACCCCTTTAAAGTCTTCCAATTGTTTGTA AAAACTTAGT  
 TAACCTATCCACCTCCCAATCATTTAACATCCTCCTAAATATAAGATCCCAACCAGTTATCTTTCCAAAAGGA  
 GGTTTTGTTGCCATTATTTACTCTGATGGAAGAATGACTCTTCATCACAGGCCAAAGTGACCTAATGGACTTCC  
 ATAAACTAACTCCATATGCTGTATTA ACTACCTTTGATACCCACTTGTCTTCCTCACCATATTTAGCTTTGATTA  
 CCTTGCTCCATAAGGTTTCAATTTCTGTGAGTACCTCCATAACCATTTCATCTTTAGGGCCTTGTTTTGGTTCT  
 TCAGGTTCT

>TCONS\_00051904

ACATTAGTCATTAATGTAGTGACAAGACGAGAACAATTTCAGTATGAGACAGGATAATCTGCTGTAACAGAC  
 GAGAGTGCGGGAGAAGTCAGTCTGCTGTCCAGCTCTGTTCAACAATCTCGCGCACCTTCCTGTTGTATTCACG  
 CTTGTTCTCACTGAACATGCGTGCTGCTTCTGAATTAGCTGGCGAGTTAGGATTTGGATCACAGAGCAAAGAC  
 TGGATTGAAGTCAGTATAGCAGCTACATCATATATGGGACTCCACTGATTTTGCAGGATGTCCAAGCAAATAC  
 TTCCATCAGCATAAATATTTGGGTGGAACATTCTGGAAATAAATCGCACAGTTGGTGGTTTGTGGATAGTC  
 CTCTGAGAATTGAAGTGTCAGCTTAAATGTACCTCCATCCCAGGGAGTATCATCAGGGCCGAAAATGACTGC  
 ATTCCATAGCATTATATTGTTGTCATACGGAGCTCCACTGATGCCGGCCGGGGATCCTGCTGTAACCGCTTA  
 AAATCCCTCATCAGTCTCTTCCTCGCCGGTGTCGACATCCTACCGCGAGCAAAAAGCGGCGAGAATTGAAT  
 GATAGACGTCGACGGGAGGTTAAATGATAGGCGGCGGCCTTATGTTCTGTCGCCGGCTTAAAAGGCAATGGAG  
 ATTTTGCGTTGGCGTGATATA

>TCONS\_00051905

ACATTAGTCATTAATGTAGTGACAAGACGAGAACAATTTCAGTATGAGACAGGATAATCTGCTGTAACAGAC  
 GAGAGTGCGGGAGAAGTCAGTCTGCTGTCCAGCTCTGTTCAACAATCTCGCGCACCTTCCTGTTGTATTCACG  
 CTTGTTCTCACTGAACATGCGTGCTGCTTCTGAATTAGCTGGCGAGTTAGGATTTGGATCACAGAGCAAAGAC  
 TGGATTGAAGTCAGTATAGCAGCTACATCATATATGGGACTCCACTGATTTTGCAGGATGTCCAAGCAAATAC  
 TTCCATCAGCATAAATATTTGGGTGGAACATTCTGGAAATAAATCGCACAGTTGGTGGTTTGTGGATAGTC  
 CTCTGAGAATTGAAGTGTCAGCTTAAATGTACCTCCATCCCAGGGAGTATCATCAGGGCCGAAAATGACTGC  
 ATTCCATAGCATTATATTGTTGTCATACGGAGCTCCACTGATGCCGGCCGGGGATCCTGCTGTAACCGCTTA  
 AAATCCCTCATCAGTCTCTTCCTCGCCGGTGTCGACATCCTACGAGCAAAAAGCGGCGAGAATTGAATGATA  
 GACGTCGACGGGAGGTTAAATGATAGGCGGCGGCCTTATGTTCTGTCGCCGGCTTAAAAGGCAATGGAGATT  
 TGCCTTGGCGTGATATA

>TCONS\_00051906

ACATTAGTCATTAATGTAGTGACAAGACGAGAACAATTTCAGTATGAGACAGGATAATCTGCTGTAACAGAC  
 GAGAGTGCGGGAGAAGTCAGTCTGCTGTCCAGCTCTGTTCAACAATCTCGCGCACCTTCCTGTTGTATTCACG  
 CTTGTTCTCACTGAACATGCGTGCTGCTTCTGAATTAGCTGGCGAGTTAGGATTTGGATCACAGAGCAAAGAC  
 TGGATTGAAGTCAGTATAGCAGCTACATCATATATGGGACTCCACTGATTTTGCAGGATGTCCAAGCAAATAC  
 TTCCATCAGCATAAATATTTGGGTGGAACATTCTGGAAATAAATCGCACAGTTGGTGGTTTGTGGATAGTC  
 CTCTGAGAATTGAAGTGTCAGCTTAAATGTACCTCCATCCCAGGGAGTATCATCAGGGCCGAAAATGACTGC  
 ATTCCATAGCATTATATTGTTGTCATACGGAGCTCCACTGATGCCGGCCGGGGATCCTGCTGTAACCGCTTA  
 AAATCCCTCATCAGTCTCTTCCTCGCCGGTGTCGACATCCTACCGCATAAGAAATACGGAATTGTTGACCTA  
 CGAGCAAAAAGCGGCGAGAATTGAATGATAGACGTCGACGGGAGGTTAAATGATAGGCGGCGGCCTTATGT  
 TCGTCGCCGGCTTAAAAGGCAATGGAGATTTTGCCTTGGCGTGATATA

>TCONS\_00052010

GCATCTATCGATCCTAGAAACGCGGCAACTCTCACTCATCAATAGAGCAGAAGGGCTGTCAAACCTGCTATTC  
AAAGAACATCTCTTCATCACCGGAATAGTTGCTGACATCTGAAAATTCATAGTAATAATCGTCTTCTGAGATG  
AGATCGATGTCAGAAAATCCAGATGGGTAATCCTCATCAAATGATTCACAATCATGCATTCCTGCATCAAGTT  
CATAATCTTCGGTGGAGTCATGAGGGCGTCTGAGATATATGATCTGTTGAGAACATCGCTTCCCTACATCGCC  
TCCTAGATTGACATTAACATCGTCTCAGATCAAGTGATTCAAGGTTAGGGCAACCATTAAAGAATAGCTTCC  
AACCCTTCATTTGTCATCTTATTTCCAACAAGTTGAAGGTTGCGCAGTTTAGGCATGTTCTCTGCAATTCCAAT  
TGCCTCTTCATCGTATTCAATGCAGGGATGTCTAAATACCTGGTTGTTCAACTTAAATGACTTCAAAGCACGA  
CAAGAGCGGCCAATAGTTTCAATGGATTCTTTGCTGATTAAGATGTGGTAAAGGTGCAGTTCCTCCAATAATG  
GACACTTCTTCACTGCCGCACTCAACCCCTCACCTGAGACATTATAGGAGCATAGGAGTCTAAGACGTTTGAG  
TTGAGGTGACCCGACATGACAGAAAATCTCTTGACCTGAACAGCAAAAACTAGTTCAGAAAACACTCGCTT  
TAATAGATGTTTGTATTGTGCAAACCTTTCAGCAATATAATAGAGCAAACCTATCGCTGCCAAAGTACTCAAG  
ATTGATATCAATTAATTGACCCTGGCTACGATCCACTGCTTCACGGCATATCTGCTCCAAGTCACCTTCCAAC  
ATGTCCCAGACATTGTCTCGCATGTTGATAACTCGCCACATGGCTGGGTCTTGGCATAATCGCCGCCAAGTTG  
TACAGACTTTATCTGCATTTCTCAGTATCTCTATCGTCCCCAGCTTCTGTAGTATCGTTGATGTAATCTCCGGCG  
GTAACCTAGCCACGGCGGTGCGAATAGATTTTCCATGTCTACTTCCATTTTGG

>TCONS\_00052090

TTATCTGTGTTTTCTCAAAACAAAAGTTGTGAATCTGGTTGTGTTTGAATTTGCCCAAGTTTTCCATCTCGCTCG  
TTGAGAATCGTTGGTTGCTTTGTTTCGCTGATTGCTTCGCTTATTCGAGTTCTTCGATCTTCTTCTTCCCTAA  
CATAAAAATTTTGGTAAGGTTTCACATTTTGATATTTTTCTTTTGCAAATCAGTGAAAAGATTATTGGGTTG  
GGATTCTAATTTGATAATTTAATTTTCTGAAGTTTATTTAAAATTGCGATTCCGTATTCTCAGCGGCAGATTT  
A

>TCONS\_00052101

GTAACGTTTCTACTACAATTGCTATGGCAGTCATCCACTTTCCAAATTCGAGATGCATATTCATAGTCAGGATG  
TAAACTTATATGCCTTTTGGTGTGCTTTGTGACTTGTAGAGCAGCATTGAAAGAGAAGAAAACAGAGTTAATC  
ACAGGCCCAAAAGCAAGCTGTCCCATCAACAGTTTCTTCAACGTAACGATATCCCGATTGGCAATACC  
CTCCCCACAAAGTTAAACCAATAATGTTGAGCTGTTCTTAAATTAATAGTCCAAAG

>TCONS\_00052138

AGGCACAACAAACCTGAGCAAGAATATCATTATAGCATCACTGGCATCGGCATCATCTTGTCCCAAAGCAC  
ACAAGAGCCTAAGCAATCTTATATGGAGGAAAGGATCTGTGATACCAGAAACGTCATACTCGGGTGATATG  
GACTGTTCTGTGAGATCCTTCAGAAATTTGACTAAACCATCTGTGCATTTCTTCTGAAATATTCAAGAGCCTCT  
GTACTAATTTTACATAGATCTATACAAAGCTGGACGCCTGTAATGAGAACTCCATGGTGTTTCTCACTTAATA  
AGGCTGCTGCAGGGTTTATAAAATTTTCGGCGAGATCGGG

>TCONS\_00052198

CAATGTGTAGGTGATATTGCTGCCACAATGGGAGACACTTGGTAACCTTCACTCCATTGTGGGAAGTTCTCTC  
CAGATCTGGTTGAAAAACAGAGACTAGTAACTCTGGTGTCAATATGATGTTAATAGCAGGTAGCAGCTGCA  
CCATGGATTCTTGTAGCATATCAACCATCTGCCGGAGACAGCTGACACCTCCAATCAGTTTGTGTTTGGTTAATA  
ACAGAAGAACCAATATAAAGAGCGACAATTCAACCACAACTTCGGGCTCGATACACGTTCAAACAACCTGC  
TGCCACCTGTAAGTTCAACCAGTAGAGAGCTGCTGGTAAAGCAAATTTACTTCTCCATCCATGTAATCTCCAT  
TAACAATTTCTCTGTGCAAATTTCTTCCATTATAGTACGCTGTGCTTCATTCAACACTGTCGGGAAGTCAATG  
CGGAACCGCACATATTGATCTCCATGGTTCACCAGAAACCACTCTTTGGCAAACCTTTGCCTCGTAGTACCA  
CAAGTTGTCCAGGCTGAACCCCTTGGGTATCTGTATCTGTGTCTTTCCGGATAGAGTTGGTACCTCAACTTTA

CCACCAAGAATAGCTTTTGTAAAGCTGATATGATAATCCACATAAAGGTCTGCTCCATCTCTAGCAAAAACA  
GGATCTTTAGCAACCTTTAGCTTTATAAATAGGCTGCCTGGTTGCATCCCTCGCTTGCCAGCATGACCAGCTTT  
AGGCACACGAATAGTATCACCAGAGTCAAC

>TCONS\_00052224

GGATCATGGTTCGATTTAAGAATCGAGACGATAAAAAGGAAGGTAAATATGGATGCTTATTGATGTTTATAG  
ACAACCTTGGGCTTTAGGTGAAGCACGCTGAAAATTTGTTAGCTCAGCAAGTATTACAGTTCCAGAATCTTCAA  
CTAGACATGGTTGGATTAGCATTCTCACCAGCACTGGAGACTTGGCTAACAGAAGCTTCATAAGCTGCATCTC  
ACGGATTGTGCCATTAGTCCGTATTAGCTTAACTTCCCTGAGGTGATTAAATGACACATCCGAGAATTGTTCT  
ACTTCAAGACATTCTAGAGCAGGTATATCGTTGCCATCACCGGCCTCCACCTTAATTTCCACATATTGTAAAC  
ATGGGAAGCTTCTTAGCAAGCAAAGAGCACATGAAACCTCTTCCAAGACAAACAGACAAATACTTGATATG  
CAAAGATGTTTGACAAAGTTAAGATTAAAGGGAAGCCTTGTGGTACTTCACCTGCTCCTGCAAAAAAGAAC  
GTGTCATTGAGATGGAGATGCTCGAGAGCAATAAGAGGCTCAAAAAACTTGGCAATATTACATTTTTCTTCCA  
CATAATTTTCTGTGTAAGTAAAGTTTTGCCAGAAGAGGGATACTCTTAAAGCAAATACATCTTATATTGCC  
TGTGAAGTCAAAGGATCTCAGCATCGGAGCATTAAATTTCAATGATGTCACTTAAACCTGAGATTTGCAGCACC  
AATTGCTCGAGCAACGGGGAATGAGAGATTAACTTTCAAGCAACTTGAAGAAATTGAAACGTTATATAAT  
TTCAGGCTAGTTAACCTATCAAATCCTTTGAAGGTTGGAGGAGGAAGTATTAAACAATTTTTTAGAGTCAGAT  
GCCTTAACTGCAAAACATCCGAAAAATGAAGAAGGCAATTTGTACTGGTTACCCCTCGGAAGTCTTAGAACAA  
GATGTTGAATGACATTCCTAGAGAGGAAATACATCAAGTTATCAAGATTAGGACAACCTTCCAAGCCAGGAA  
TGCATAGAGTAACTTCGTAATTGGTCCTACATGAAGGGTCAAAATGTGGTAGATAATCTTTGTGAAGTTACT  
TGTAATGTATGTTAGATCCTTTTTAGTTTTCCAAAGTGCTTGATCAAGCGCCAACTGTGGAAGTCTACACCAGT  
TATATCTCCATTTCTTCGCCAAGATGCTTGTCTCACAGCATCTCGTAAAGGCAAACGGATAAGAATTTTCATC  
AACTACATTCTCGGGAAGATTGTTAAGTACATCAGGGGGTAAAGTTCGAACACAA

>TCONS\_00052283

ATTGTAATAATGCCAACTATACTATCCGTAGCCACTTGCTACTGAAAGGTGAGACGAACGCTGAAATATCCT  
AGGTACTTGAAACCTTAGCCATGGCCATCATTTCCTGAACTAAATCCTCAATGAACTTGCATTGTATATCCTTG  
TTCAACAGAACTCCTTCCATTTCTTCTGATTTTCCCTAATTAATTTACCTGGCTGCTTGTCAATCTCCACCCCA  
GCTTTCATATCCCCACTCACCAGCTTTGCATTGAGAACTGGTCACCTTTCTGGGGCAACATAACCACTTGAC  
AGTCATTCACTAGTGCCTCTATCACTGAACTGAACCCTGCATGACACACATAGCAACCTACACTAGAGTGAG  
CTAATATATGCTGTTGTTGCACCCAACCTGAATGAATAATTCCCTTGTCTTTAACTCTTTCTAGAAACCTTCTG  
GTAAAGCTCGGTTTAACTCGACTGAGAAATCGACATTGGCAGGAAAATTTAGGACCAGAAAAGAAAGGTAGC  
CCAGTTTGCTCCAGACCTAAAGCCAGTTCTTTGATCTGTTTCATCCTTCAAGAAAGTTTCACTTCCAAAAGAAC  
AGTAAATGACTGTTCCAGCTTCAAACCTTGTTTAACCAACTAGACCATCTCTCTTCCAATTTACCAGAAGGTGG  
ATCAGGGACTACTGGTCCTACAAGAAAAACAGGTTTATTGAATTGTGCTTTCACATATTCTATATAAGGGCCC  
TCCATTTGAGAACAAGTCTTGGCTAGTATAGCAGAGCAACCCTTGAGTCCTGAGAGTACACGGTCATATACA  
GTAGGACCACCATGGAAGCTCTTGAAAATGTATAGAAAATCTCGAGCCTCAAAGGTTTTAACTGAGGTGATA  
GAGGTGTTAGGAAATCCAGGTGGAGGTTTTTTCATGTCTTCCAGAGTTGGATATTTTTTGGGTTTCAGGAACTCT  
AGCAGGACAAGTAAGAAAAGCAGTGGAAGTGCAACAAAAACAGAGTAAAAGACAGTCTTGATCCCTAAT  
TCATCAGCCATTTTTGGGAGCCATTCTTGAGCAAAATCAAAAAGAACAAAATGGGGTTTGAGATGGGTGAGT  
AGAGTCCTGATTTGTGGTTGCATAAGGTCTAAACCAACCTTGAGAAGTTCAGCAGTTACTGGTGTCAACTCAG  
CAGTACTTTCTGCACCAGGAGGTAGACCTTCAACTTGGGGAATAGTGAGAGGGACTATATGAG

>TCONS\_00052494



CTTATAGACTGACTACGTTTTGCGATACTTTTGCTATACGTTTCATGTTTTCTTTTCATCATAGGAGTATAATTTT  
GTTCAACTTGCTGATCAGAATCGTTTTTCGTTTTGCTTTTTCAATTTTCTTTTGGAACTTTTCTCAGATCATAAGT  
TTTTAGAAGATACAATATGTACTCACTCCCAGCATTGCGGAAATGCCGTTGCTTCGTGTTTCAGCATCTTGAAG  
ACATGAAGCATAGTGTCCGACTTCTGTTTTTCCCTTCTGCAATTGCAAAGAAGGATTAGAGATTGATCTCCAA  
ATTCTGAACAGATGACATGACAAAGACAGTTGAATGGAGTTGAGAGTGATGGCTCGCAAAACCTTTACAAA  
GTGAATGGTACTGTCTTTATGGTAGGTCTCTGAAGTTTGTGTTTGCTCCTTTTACTCTAATTTTCATGTACCAATCA  
TCAAGGTATGGAT

>TCONS\_00052495

GAACTATATATGAGATAAGGAAGTTTCATGTTCTTAAGGTTTCGTATTTACTACATGATATAATCACTAAGGA  
TATTTTCCATATTATTCTTATTGATCCTTGTAACTTTCATTGATAATATAATCATTACCAAATTCTCTACTATTTA  
ATTATTCTGTAACTTTGAACATCTTTTTTTTTCTTATTATAGTGGTGTCCGGGTCAATTTGCTCGCACCTTGACTA  
TCCCACCGAAAAGCCTGCTGCAGCCCACCGTATACGTGTGCGGAAATCAGCTCACCATGGTGGGGCAGATAG  
GCTTATACCGAGTGTTATAGCTTAGCTTTGGACCTGAGATCTCAGAAGTTGGAGTTGCCAGTTGGTGATTCTCC  
TCCTTTGTTTTGTTGTATCTTTCAATCACCGGCTTCATGCTGTCAAAGTAAATATATTCAGAATTGTCTACGTTG  
TACTGATTGAGCAAATATTT

>TCONS\_00052499

GATCATAAGTTTTTAGAAGATACAATATGTACTCACTCCCAGCATTGCGGAAATGCCGTTGCTTCGTGTTTCA  
GTTGAATGCTGAAATTTGACATTGGTTTGTAATGAACTTAGTTTGTCTTTCTGAAGACTATTGCATGCAAAGC  
ATATTGATGCAACTTTGAGCATCTTGAAGACATGAAGCATAGTGTCCGACTTCTGTTTTTCCCTTCTGCAATTG  
CAAAGAAGGATTAGAGATTGATCTCCAAATTCTGAACAGATGACATGACAAAGACAGGTTATAGAGTTGGAT  
ACCTTGAGTGAAGCAGTGGTACCTAGAACCTAGTGCTATCCATGAATGTCATTATCTGCTTAATAACAACAAG  
AGGGACTGTGTAGAAATAAGAAGATAAGGTGCAGATTAACACCAACTGTCATCTTGGTAGAAAGTTTAGGAC  
CGCTATCGTCTTCTTTTTTTCAAAAAGGTTTGACTCGTCTACAAAATAGTACCACATTCAAGTTTGACAAGT  
TAGGAGATGAGTGTGCCCTAGCTGACCATCATCA

>TCONS\_00052500

CAGTGCATCTTCATTCATCTTCTCCTCAAATTGTCCGATTAGCTTTTCGATCACTCACAACACTATGAAATTGC  
AATTTTTTTGGCCATTAATGGCGGTGGTTCATTCACCGCTTTTCTGTTTTGTTTCTAAGTAATATAGAAAAAATC  
TTTTTTTAGTATCATATGCTAAACGCAATTTTCATCTTTGCTTATAGACTGACTACGTTTTGCGATACTTTTGCTA  
TACGTTTCATGTTTTCTTTTCATCATAGGAGTATAATTTTGTTCAACTTGCTGATCAGAATCGTTTTTCGTTTTGC  
TTTTTCAATTTTCTTTTGGAACTTTTCTCAGATCATAAGTTTTTAGAAGATACAATATGTACTCACTCCCAGCAT  
TGCGGAAATGCCGTTGCTTCGTGTTTCAGCATCTTGAAGACATGAAGCATAGTGTCCGACTTCTGTTTTTCCCT  
TCTGCAATTGCAAAGAAGGATTAGAGATTGATCTCCAAATTCTGAACAGATGACATGACAAAGACAGGTTAT  
AGAGTTGGATACCTTGAGTGAAGCAGTGGTACCTAGAACCTAGTGCTATCCATGAATGTCATTATCTGCTTAA  
TAACAACAAGAGGGACTGTGTAGAAATAAGAAGATAAGGTGCAGATTAACACCAACTGTCATCTTGGTAGA  
AAGTTTAGGACCGCTATCGTCTTCTTTTTTTCAAAAAGGTTTGACTCGTCTACAAAATAGTACCACATTCAA  
GTTTGACAAGTTAGGAGATGAGTGTGCCCTAGCTGACCATCATCA

>TCONS\_00052605

AAAAACAACCGATAAATAGTATATGTAAAGATGTACCCTGTTAAAAGGGAGGAACTTGTATATGAAATTACA  
TTTATTTTCTTTCAATATTTTATAGGCCCAAAACAGGCTATAAAAATGCATTTCAAGTCTATCTTTTCAATGGA  
AAAGACAAAGAATAATGATGTTAATCCATGTCAAACCTTCACTTTGGATCGCTAAAGAAGCCGTTGATATTTG  
GCATAATCTCTGGAGACTTGTTTCGAACAACTTCCTAAGAGCATGCTCAGCATATTTCTCCCCTTCTGAAAA  
ATTGTCCAGCACCCCTGCTGCCCCGTTTTCTTTGTACCCTGACTTCAGGGTTGCCGCAGATATTACGAACCA

ATTGCATTCCACAGATTCTCTACAGCAACGCCTACGGCTGCAAAAAGTGGATACACCTCGGGCCTCAGCCAAC  
GGTTAAGGGTGGAGGAAGCCATAGAAAAACGGGG

>TCONS\_00052664

CGATTCTGTATCAGGCTCAAATAAGCTCCATGACTGCAAATTTATTTCAGCAGGCCGCTGTCCCAAACTGAAA  
TATCCTCATAACGCTTCCCAACATTGTTTCATCTCCCAGAGCTTATGAACCCCGTAATCCACCGCCCTTTCGCCG  
AGGAGAGCGCCAGCGATGACAAAGGTAACGTAAACAGAGTTACGGCGCATAATAAGTCTGTAAAATCCTTC  
CATAACCCCGCCGCGCTTCTTCTAGCTGATGTTCCCTCCATTT

>TCONS\_00052752

CAGATTTCGAGAACAAATACACATTCTCGTGATTTGTATCCAAGGGTCACTTAGACATTGAAAAATTGGATTAT  
GAAATTGCGAAACATAATTTTGAATTGGATCAATACTTCCAATTGAATAAGTATGAATAAAGGATCCATGG  
ATGAAGATAGAAAGTTGATTTCTAATCGTAACTAAATCTTCAATTTCTTATTTGTAAAGAAGAAATTGAAGCA  
AAATAGCTATTAAACGATGACTTTGGTTTACTAGAGACATCAACATATTGTTTTAGCTCGGTGGAAACAAAAT  
CCTTTTCCTCAGGATCCTATTAAATAGAAATAGAGAACGAAATAACTAGAAAGGTTGTTAGAATCCCCCTCTT  
CTAGAAGGATCATCTACAAAGCTATTCGTTTTATCTGTATTCAGACCAAAAAGCTGACATAGATGTTATGGGTA  
GAATTCTTTTTTTTTCGAATTTTGTTTCACATCTTAGATCTATAAATTGACTCATCTCCATAAAGGAGCCGAATG  
AAACCAAATTTTCATGTTTCGGTTTTGAATTAGAGACGTTAAAAATAATGAATCGACGTCGACTATAACCCCTAG  
CCTTCCAAGCTAACGATGCGGGTTCGATTCCCGCTACCCGCTCTATATCTATTTATTCTAAATATTTTAATCTAT  
TCATTAAATCAAATTTAGTTTATTAGTATTAGTACATCATTGAATATACAATTCCAAAAATTCTTTCACATCCG  
ATTCTTTCTGTTTTTTTTTCAAACAAAAAGTTAAAATACGAAAAAAAATCAGAATGAAAAGCGTCCATTGTC  
TAATGGATAGGACAGAGGTCTTCTAAACCTTTGGTATAGGTTCAAATCCTATTGGAC

>TCONS\_00052764

ATCCTTAACCAACGCCTTCCTTGATTCACCTTTGCTCTGGGAGCACGAGCAGCACGGGTTCATGTTTGCGCT  
GACGGTGGAGCGAATAGGGTGTGTTGATGAATTGCCCCGCTTTTTTCTCATGACGACCTTCTGATATTCGTAA  
GAGGTACAAGCCATATGCTATAAAAGGAGATATGGATTCAATCAGAACTGATGTTTTTGACTTTTATAGAGGC  
CCGGTAAGCTAGAGTTTGCTTGATGGTTCTGTAGTTTCTTAGCAAATCTGTTTTCCAATAAATTTTAAAAGC  
ATCCACATTTTGATATTTGTGTAGGGATAAGTGTAAGAAGAACATTTAGTTTTGGAGAATAACTAATTTGCCTTA  
AAAGACAGAATATTTAGTGTTGAAATGAAATGGAACCTGAATGGTGCGGCAGAATAGATACATTGGATTGAT  
GTAGCCGATCTCAATTAATTTGGATTGAGG

>TCONS\_00052801

ACCTCTTATATAAAACTGATCACACATCTGCCTGAAGGAATAGTGGTCTCCAGTACCAGTATCATAATTGTCC  
TCAAACACAAGATGCCTGAACCCAGCTTTAAGTGCTTGCTTCAGTCTTTTCAATTCATTTTGATGGTCATCAAA  
AAAGACAAGAACCTGGCTAAGATCCTTGACTCCGTGTTTCTTCATAACTTTTCTCCAATCAACGCTTCCAAAA  
TCAACAAAATCTTTTCCAGCAAAGTATGTGCAGTTCCCATCAACATAAGCAGGTCTTTCTTGAGATACTTCTC  
AGGATGACGGGGTGTAAAGTGAGATGATTGGTGTATCTGGCATTGCTTGTCTCAAAACCCAAGTTGAGTGTCC  
TTGAATGCGCCACTCTCAATCATTATTTCTGGTTTTAACCACCGAGTCATAAACCAGAGCCCAAAGCTGTGGT  
CAAAACCCATCCCATACATGTTATTCTTGATAGGTCGTGTCTCATATATGGGCACAACTCCTCCAAGCCTTTG  
ATTAATCCTTTGTGGTCCATTCAACAGTTTTTCCATGTTTCGATCTGCACCAGGGAACGCCGAGAGATCCGA  
AGTCGGTTTCAAGGCCATCAAAGCCGAAGAATCGAAACGAGAAATGTGATCGGAAGAGGAAGCTGAGATA  
CACACTAAATCACGAGTGTGATAAACGAAAGAAGTGAGCACAATGATTACGAGCCCTATGAGAAGGCATGG  
CCAGAGGTGGCCGGTTCGAATCAAGTAATTTGTGATCTTCGTCGGTACGGAAATGTGCTTCCGTGTTTTGGATT  
GGTCGCCGTCGTCGTCTCCGTCGTCCTGAACGGCGGCCCTGCGAGAAGAGAGCGCCCTTTCTAGCATCGT  
CCTCGTTTATGCTTTC

>TCONS\_00052862

AAAACTCTCCTTTTATGTGGATCTCTTAATTCATTTGTCAGCTTTTGCAGATACGCATTTAGATGTCATCCAA  
AGAGTAAAGATGGGAGACGTCATCTTGTAACAGTTAATGACATTGCGTTTAACCCATCCATTATTGGTTCATT  
TGTCACTGGTGACAATGACGGCTATGTCACCTTGTTGGGATGCTCGGGGAAGGAAACGGATGTTTGAGATGCC  
AAGGTATCCCAAGAGTGTTGTCT

>TCONS\_00052877

ATTTCTGGATATTTATTATTGGTGAAGCATTAGCAGTGTTATCAGATAGGTTAATTTTTGTCTTTATTTCAGTTGC  
CTTCTTCTCCAGATATTGTATTTGCCAGAAATTGCCTTTTAAGTAAAAATATTACATGATCAATGTCTTATGTG  
ATTATCCTGTTTGTTTTACAGGTGACAAAGAGATGAAGTTTCTCTGAATTGGTCTTGACATGGAGGAGAGCC  
ATGGCATTGCAAGCTTTAATGGCTCTCTTTGAAAGAGATGAGGAGGTGTTCTATTTTTGTTTTTTCGTACCATT  
GTCAACTCTTATCTTATCATCGATACTTGGGTCTGTGATAAAACACATCTCATTCTCTTGCTT

>TCONS\_00052880

GCTGCTGTTTGTAGTAGTCGATAGAATCAACTTTCTCACCCCAAAGTCCGAGAAAGCCTTTCTTTTTAGTTGGC  
CTCTTTTCTGGATTTCTTTCAAACCTTAAGCTGGTTGTAGTCCAGCCAATTTTGAAGTCTAGCCCTTTTCTGACA  
AGTTTGGCAAACCTGTTGGCATTATATACAGCCTGGTGACAAAGATAGTGGTCAGGATGATTCTTCTTAAAGA  
AATTTCAACACTATCTGTTATTGAGCGCTTAGATTCATGAGGAACATTCTTAACCAGAACCGTGAACCTGTTT  
GGCACGCCTGTCTTGTGAAGCCAAAAATTTAATCTCATTGCAG

>TCONS\_00053090

GCTTCTGATCCGTCTCCTTATTGAAGTAGTGCTCCACTTCAATTTGCGCTATTGAATCTGGAAATTCCTCAGAT  
ATCTTGCGAGTTCTGACATCAAAGGTGCGATAAAAGACAAAGTCAGCTGTGTCCAAATCTTCGTCTTTTGGCT  
GAGGGTTCCTCTATCATTTGATATGCAGACAACATTGCATTTACCAGTGATGGCTTCCACACGATTACAATTT  
GAAAGCCCTATGCCTTCTCCTGAAGCCAAGAGTAACTCATTGTCAAGCAGCTTGATATTAC

>TCONS\_00053236

ACATCTGAATTACCACCCAAAGAAGGGACAGCCAAATGAGTTATGTACTCTGCATCAACCACACCGACTTTC  
CTTGACGATCACCTGCGCACAATAACCGAGCTTCATATCCAAGCCCCATGCATGGATCAGGTCAATTCTGGA  
CCATATACCAAGCACAGCGCCAGGCAGCTTTTGAGAATACAGGAGCCATCATTCTACCCACCCACACAAG  
GAGGTGACGTGCTGTTGTTATCACACCTTTGGCCACTTTTATTTAATCTGTAGAACCTCCTGTGTACCTTGGATC  
TCCCTCTGCGTACAGTAATATGATGATGTACCTCTGATTTACTAGCATCAAGTGCTGGCTGCGATATCTCCAGC  
CCTTCTTCTCTAACAATAGATATATACTTTTCTGGATGGAAGTTTCAACTCCTAGGTCTCATCCCACAAGAA  
AATGTAGTCGTAATCAGAACTATATCTGGGTGCAGAAACCTCTTCGCAAACCACCATTTTGTGTTGGTTCATA  
GCAGAGACATGTAAGACACGGCTACTCCAATCCAAATCATTCCACTCATCCACCACTCCATCATAGTGAAAA  
AGCATCACAACAAAGTCATGTTCAAGAACTTCTTAACAATTTTCGTTACCATCTCTTTTTGCTTTATTCCAAC  
TGCAATCCCCAACAAAGTTAACTGAATGTGGAGACTTCTTCTCAACATCTCCCCACAATGGTCGCATTTCCAGG  
TTCGTAGTTTTAGAAACAATTCCTTCTGGGAGTGCCTCACTCCCTAATGGCCTGCATTTTTTCTGGCATTATTA  
TTTTGCATATTCTCTGCCACGTGACTCTCTTTTTTCTGTCTCGGTGGTACCTCGCATTTTCTGCATTGTCCAT  
TCTG

>TCONS\_00053354

CTCCACCAGTAGGTGCAGCAACTGCAACAGCACCAACCACCACCAGCAGGTACTGAAGCCAACCTTTCTCTGC  
CGGCAGCAATCAGCTCAGTGATGTCTTTCCCTCAACTTGAGACAAGAGCAGTTCGATTCTGTCATCATCAGC  
CTCAGCACCAACGCAACCAAGGATGCTTTTCAAGTCTTTAGCTGAAGGTGATGCATTGCCACCCAAAACGGC  
CAACAAATAAGCTGCAATTACCTTCATTTTTTCTCTCTGTAT

>TCONS\_00053440

GCTCTTCTTTTCGTCATGACAGAACGTTTAATAGATTGAAATAGGAAATAAATCATGTCAAAGAGGCGAGGCA  
AACATGCAATCATCTGTTTGTGCCTTTTTGCCTGAGATATGGCTGGATCTTGCTCCTCTAGTTCCTTACTCTCTT  
TTTCTCCTATCGATTTTCAAGAATTCTCAGGAAGAATGTCAAAAATATCATCGGTTGGAAACTTTTCACTCTCA  
CAGACTTGATCAGCAGCATTT

>TCONS\_00053527

ACAGTAGGTGAAGTGCTGATTGAGATACAACCTTCATAACTGTCAAAGGAAGAAAGAACTATTTAGGGATATG  
AGATATGATTGCTCTACTTAGCTGATGGATCATCCACTAATGAGCTTAGTAATCAAATGGAAGTAGAGGAAT  
AGCACTTGTTGCAGAAAATTTCCAAGTAAAAGACAATTTAGAGGGGGAGCTGAGACACATTGGCAATAAT  
CGAAATTATCAGATCCAGGGTGAATCTCTGACAGGGAGAAGAATTTGATACCTAGCAAATTTTTGTGCGACTTT  
CTATGTTTCCTTCCAGGCGCTTGCTAATTAGGTTACAACCTTGTGAGTTTGTCTAATTAGTTTATTTGTCAATTG  
GCGAGTGTATTGTCTCAGCTTTGCTACTTTATTCTTGCATAATGTCCTTTGAGCTCTTTTGCTTGTTATTCCGATT  
CTTCTGTTAATTTGGCTGGATCAAAGCTCTGAATATCACGTGGCTTATCTAATAGGTGCACTCAGATATTGATA  
GCTCATTAAATATTATGTTTATCAGCATGATCATCAAATCTTCTCATTACAGTCTCAGTTTACTTAGTAGCAA  
GTTAATCACAGTTATCAAGAATTCTGCATAGATCCATAATGAGTATGTGTTAGAACTGGAGCAAAAAAGCTA  
ATCTGT

>TCONS\_00053530

TCTAACCACCAAAACCATAGAGAGTACGGCCTTGCCTCTTGAGCGCGTAAACAACATCCATAGCAGTCACAG  
TCTTCCTCCTAGCGTGCTCAGTGTAAGTTACAGCATCACGAATCACATTCTCTAGAAAGATCTTGAGCACGCC  
ACGTGTCTCCTCGTAGATAAGCCCACTGATACGCTTCACTCCTCCTCTACGAGCTAAACGCCTGATTGCTGGC  
TTTGTGATACCTTGATGTTATCACGAAGGACTTTACGGTGTGCTTTTGTCTCCTCCCTTTCCTAATCCTTTTCTC  
CCTTTCCACGTCCAGAC

>TCONS\_00053805

TAAGCTCTAATTCTGCACAACCTTCCCAATGTTACTAAATGGTTTGAACGTGTGTATTTATGGACAGAATTTTGCT  
GTCTATAAAAAAATTTGGCAGCATATGAAGCTCCTTTTTGAGGATATTATTAATCAGTCCCATGCGTATTCCAG  
GGCCAAAAATGAAGCATCATCCCTTGCTTCCATATGTATAAAGATGATGCTGGGATTTGTGGCCATTCAAGT  
GGGCATAAAATGGGGATACTTTATTGCAAGGTGGTACAGGCGAGCTAATGTTCTCATGTAGTAATATGCTGTG  
TCCCATCCACAACACTACAAGGGAGGGTGGGGCCGTGGCTGAAGGGGCGTTTCACCCGGCAGAGGTGCCAG  
TTGATACCTCAAGAGATGATTCCAGATACCTGTTTGGTAGTCATCCTTGTCTTTTTCTTTATTTTCTATGTGATCT  
TATCATCCTCCCAATTTGATGATTCTCTCATCTACCAAATTACTCTAGGACATCTGCACTTTGGATATTTCTCCA  
AGCTAAAGTTATACATTTGCACTTTAGCAAAATCATGTATTTCAAACGAGAATCTGCTCAAGTATGAGTGCT  
TAAGATTGCTTAGTTTTAATGAATTGCACCCAGATTTCTATACTTCACAAATAATTTTTGGCAATTTCTCTATGT  
TCTCTGTTATGTGAATGGAAGAGACAACAAAAAAGTTGAGGGTGTTCAGAATTCCATTATTGCCGTTTGAGGT  
GTTGAGTTCCAGTTAGACCTTTTTTGAGTTTCTATCTTTTGAAAGGTGTTTACAGCAGGCCAAACCGGGCATGT  
GGAAGCATGATGAGGG

>TCONS\_00053863

AGTTTATTATCTTCAAACATGCAGTTTATAACAAGTACAGAGTGATTCTAGAATGTGGGACTTTGTTTGCATTA  
ATAGGTCATATATAGGAAATCCTCGAAGATAATATGCCCCTGAGAGAGACTGTTGCTGTCTTTGTTGTGACTT  
GTGACTCAGACCTTAAGGGAGAGTGAAACCCCCAGTGAAGCAGTGCTTATGGCATCCATGACATTCATCTCT  
GCTCCAATTGTCAGACACAGTCTTGAGAGAAGATCGTGTTGAAAAAGAGTAGCCAAACTGCCATCACTTGCA  
ACTCGAGCTTTAATCAGCATAAAAGGAAACGGGGAATGCTGGGCTCCCAGGGTAACAGTCGTTTGTGTTGCTG  
GAGAATTGATACATTAGCTCCGCTGCAATCCCTGTGTGTGTTAAGGGTAGAATTTGACGGTAAGCAAGAGCTC  
TCAAAGTGTGAGCTTTATCGCTCAAGGTGAGTGAAGCAGTGAGAATGTTAGTATTGAAGCTCAAACCAGCAT

CGCATTTGGCCACTGTATCAGTTGCTGCGTCAAGTGAGATATCTGTTCCAGTGTTGAAAAAACCATTTC CAAT  
GACACCAGAAAACTTATCAGGGGGCTTTTTGTCAAAC TAATGCCTGCTGTATACCCAAAATAATCACGCAA  
GTACTGCATTTCCACCTTATTAGACCTCTGATATGGTAAATAGAACTTGAGAAGTGCCCTTATTTCTGTCTAG  
GTACGCTGGCTCTAACTACAGTAATCGCAGAATGATCATAACAGTAACTTTGAGAAAGCAGAATATAAGGAAA  
TTGAAGAAATAACAATAGATACCTCCACTGCTGAGGTTTAAGCTCCAATCTAACCAATTGAAGTGATAGCAA  
ATTGGCGGCTGCATGTTATAATCTCCATACAGAAGATCTGTTGCATCTTTGCCAATATCAGAATAGATCCCTG  
GCTGCTTGCTCATTTTTTC

>TCONS\_00053873

TCAACCAAGAGTAATGTACATCAACTTCATCTTTACATAGCACTTATTCGTTGATGAGAAGGTCAGATTCAGT  
TTCTACTGGTAAATTTAAGATGGTTCAGTATTAGAGCTTTGGAAATTTAACCTTTTAAACCTCCAAATGCATCT  
CAGTATCATCCATAAATGACTGACCAAAAACTTATCCAAAAGTGGATACAACTAAGAGCCTAAGAAATAGG  
ATGCGAGATATGGCAACCCCATCGGCCCCATTAGACAAATGATTTGTGGGTATCTTAAGAGGTGGGATTTAA  
AGCAAGCAAACGAGGACCTCATCGTCCAAC TGCCTGAGCCACCAAGAGATATGTTGTGTTCTCGCACCTGGA  
AATGTGTGTTAGAATCGCACAGATCACCAAGGTACATATTGTACGTATCTGATAGACCACGACTCAGATTCA  
GCTAATTACCAGGCCCAAAAGAATTGCAGCCAAATCCCGGCTACAGCCAGAAATCTCTTTAGGAAGTCACAG  
AACCAACTAGCTTGAAACTTCCAGCTCTTCCTCCTTGCTCTTTTGGTTTCTGATCCTCTCTGATTGAGAAACAA  
GCAGCTCATGAACTCTATTCTTCAACTCATGAAGACCAATCTCATTCTTGACTGACACATGTAACGCTCCATC  
AGGTCCCATTGTCCTATACCTCACCAGCTCAACGTCATCAATATTACATTCATCTGTTGCAAAGATGACAGGA  
GATGCTTGCAGCAAGTCACATTTGGACACGATATCAAGCCAAATGTGGCTACTGAACCTCTCTCTCATTTCCT  
TATAGATCAAAAACTGATCAGAAGGTGACATCCACATTCTCCGGATAAATCATGAACATAAAGTACTGCAG  
TCGGCAAATGAGTGAGAACAGCGAGTGTTAACTTTCCAAGTTATTCTGTCTCATCAGATCTCCTTAAGAT  
ACCAGGGGTATCAGTAACCTGAAAATTCTGGTAGCTCAAAGTAATATGACCCATCAGAATTCCTCTAGTTGTG  
AAGGGATAGTTGCAGATCTCAGGCTTCCTGTTGAAAGTACGCGAACCAAAGATGATTTTCCAACATTGGGA  
GCACCGACGAGACAAAGAGTTGGTGTTTCCAGATTGATAACTGGCATTGCCCGTAATGTCTTGGAATGTTCA  
ATAGTTCATCAACAGCTTTTCCATCACGACCAAAAAATTCCTCAATTCTTTTCATTCCCTCATTCAACCGCTCCT  
CTGCTTCTCGTTTAGATAATGACTTTGCACATAATGATGCATGTTTCCTTTCCAAC T GATAACCACCTTTTCCTTA  
AAGCTTCAAGCTTTCCTAAAACCTCTTCATAGTTTCCATCTCCAAGCGTTAACTCAATCAATGATCGTTCATAA  
GGGTGCAAATATCTTTTGTGTTGGGAAGTTCTCCTTGATGTTCTCAAGGGCACAGCTATCTCCTTCATTAATGC  
GTCAAGTTGTTTTGCGCCTCTATTTCTCTCGCGTTTTGCAAGATTAAACAATGCCCTTTGTAGGCGAGACCCTCTT  
TGCTTTCTTCAGTGCTGAATGTAGAATATCTACAGATGGCATCACCATCGGTAATTTTTGAAATGCACCTATCT  
TTTCTACCTCCGGCGCCAATTTTTCCTTTTTTTCTTGTTGGTCCTGTGTATTTGATACTACATAGCTTCCTTTCAC  
AATTCATAAGTAGTAGTCTGCATTTGCTTACAGAAGCATGACACTGGATACAATACACGCACAGGCACCAA  
GTACAGACCTTTAGAGAGCTTAGAACGTCCAGAAAACAGAG

>TCONS\_00053874

TCAACCAAGAGTAATGTACATCAACTTCATCTTTACATAGCACTTATTCGTTGATGAGAAGGTCAGATTCAGT  
TTCTACTGGTAAATTTAAGATGGTTCAGTATTAGAGCTTTGGAAATTTAACCTTTTAAACCTCCAAATGCATCT  
CAGTATCATCCATAAATGACTGACCAAAAACTTATCCAAAAGTGGATACAACTAAGAGCCTAAGAAATAGG  
ATGCGAGATATGGCAACCCCATCGGCCCCATTAGACAAATGATTTGTGGGTATCTTAAGAGGTGGGATTTAA  
AGCAAGCAAACGAGGACCTCATCGTCCAAC TGCCTGAGCCACCAAGAGATATGTTGTGTTCTCGCACCTGGA  
AATGTGTGTTAGAATCGCACAGATCACCAAGGTACATATTGTACGTATCTGATAGACCACGACTCAGATTCA  
GCTAATTACCAGGCCCAAAAGAATTGCAGCCAAATCCCGGCTACAGCCAGAAATCTCTTTAGGAAGTCACAG  
AACCAACTAGCTTGAAACTTCCAGCTCTTCCTCCTTGCTCTTTTGGTTTCTGATCCTCTCTGATTGAGAAACAA

GCAGCTCATGAACTCTATTCTTCAACTCATGAAGACCAATCTCATTCTTGACTGACACATGTAACGCTCCATC  
 AGGTCCCATTTGTCCTATACCTCACCAGCTCAACGTCATCAATATTACATTCATCTGTTGCAAAGATGACAGGA  
 GATGCTTGCAGCAAGTCACATTTGGACACGATATCAAGCCAAATGTGGCTACTGAACCTCTCTCTCATTTCT  
 TATAGATCAAAAACTGATCAGAAGGTGACATCCCACATTCTCCGGATAAATCATGAACATAAAGTACTGCAG  
 TCGGCAAATGAGTGAGAACAGCGAGTGTTAACTTTTCCAAGTTATTCCTGTCCTCATCAGATCTCCTTAAGAT  
 ACCAGGGGTATCAGTAACCTGAAAATTCTGGTAGCTCAAAGTAATATGACCCATCAGAATTCCTCTAGTTGTG  
 AAGGGATAGTTGCAGATCTCAGGCTTCCCTGTTGAAAGTACGCGAACCAAAGATGATTTTCCAACATTGGGA  
 GCACCGACGAGACAAAGAGTTGGTGTTCAGATTGATAACTGGCATTGCCCCGTAATGTCTTGGCAATGTTCA  
 ATAGTTCATCAACAGCTTTTCCATCACGACCAAAAATTCCTCAATTCTTTTCATTCCCTACAAAGATATCCTA  
 TTACTTATCAACTTATGGATTATATCAAATCAATAAGAAATTCAGTAAAAATGTGAAACTATCAGCCTACCTC  
 ATTCAACCGCTCCTCTGCTTCTCGTTTAGATAATGACTGCCATAAATTGCATCAATTACTTGATTTGCATCTTTG  
 CACATAATGATGCATGTTCCCTTTCCAAGTATACACCCTTTTCCTTAAAGCTTCAAGCTTTTCCTAAAACCTCT  
 TCATAGTTTCCATCTCCAAGCGTTAACTCAATCAATGATCGTTCATAAGGGTGCAAATATCTTTTGTTGGGAA  
 GTTCTCCTTGTATGTTCTCAAGGGCACAGCTATCTCCTTCATTAATGCGTCAAGTTGTTTTGCGCCTCTATTTCT  
 CTCGCGTTTTTGCAAGATTAAACAATGCCCTTTGTAGGCGAGACCCTCTTTGCTTCTTTCAGTGCTGAATGTAGAA  
 TATCTACAGATGGCATCACCATCGGTAATTTTTGAAATGCACCTATCTTTTCTACCTCCGGCGCCAATTTTTCTCT  
 TTTTTCTTGTTGGTCCTGTGTATTTGATACTACATAGCTTCCTTTCACAATTCATAAGTAGTAGTCTGCATTTG  
 CTTACAGAAGCATGACACTGGATACAATACACGCACAGGCACCAAGTACAGACCTTTAGAGAGCTTAGAAC  
 GTCCAGAAAAACAGAG

>TCONS\_00053989

TCTATTGCTAATAAGGAAACAAAATGAACAGCAGCTTAACGTTTTCTCCGCCGCCACCAAGCTTAGGACCTT  
 TTGATGCACCTCCTTTGGGGAGGTTGCCCTTTCCTCCAGCTTTCTGGGACTTGGCCGTCACCTCTGCTTTCTTAG  
 CCTTCTTTTCATCCTTTGTCTTCTTAATCCTTTCCTTAATTTACGAAGAGCAGCTCCCTGGCAGCATCTCGAA  
 CTTCTGGCCTTTTCAGTTCTTTTCTTCTGGATAACCTCCAAGGTTGCACCCACAATGGACCTAGAGTAAGGCTTC  
 TTGGTGGCACGTCGCCTCTTCTTAACAGCTTCTTGTGCAATATCCTTCTTGTGTTGCTTCTATACATAGCTGTC  
 CAAGTAAGTTTTGATGGCTTCAGCCTGTTGTGGAAGTATCTTTTGCAATTTGAATTGAGGAATAGGAACACCTG  
 AGAATCTGAACGAATAAATCTGATGCCCTCCCAGGGTAAATCTTGCCACCACTGAAACGACAGAGTTCTGT  
 CTTGAGAACCATGGCTGATGCTGTTGCGTGCCCTCCCTCTCGATGAAGAGAAACCCTAAG

>TCONS\_00054011

TTTGTGTTACAGCCCAAATCACACAGCAGAAAAACATTACATAGAGAAACAAAATTA AAAAAGAAAAGCCAC  
 GACACACAAACCTAAGAGCTGATGATCACAGTTCCATGGCTGCAGTCTTATCGTTATTATTACAAAAGCTTTT  
 ATAGCACACACTTAAATTACTGTGAAATAATCTTAACAATTGCAAGGGTGCAGGTGCAGTTTGATCCACACT  
 TGCACCCATTTCTCCTTCTGCTGCTTTCTCTCCGAATTCCTCAAAGTTGTTTCATGGGAGCAACACCCTGAATG  
 ATGGTAAAAGTAGTGGACTTCTCCAAGTCTGGGTACATCCACATCCTCCGCAACCGTTACCGCACTTGCAAC  
 CAGACCCACAGCCACAGCTTCC

>TCONS\_00054028

CCCCTCTGCATCTTCACTCCATTACCAGTTGAATAATCTTGAGCTTGCTGTCAATCTTGCCAAAAACGGAAAC  
 CTTCTGCTGCTGAGAATTTGGTAAGTTAAAATCATGTTTCTTAAGGCACTATATTTTGAATTAATTTCTTGATT  
 GGATGGAGATTAGAGTGTGAATGGTGGGATATTTTGAATTTGGTATGTTTATTATATAAGGATTATTACCAG  
 CTATAAAGTGGAAGAGAGAGAGTGGAACTACGAAAAGT

>TCONS\_00054047

TAAAGCCGAAGAAATTACATAGAATAGAAGACTATAGACTAGTTGTGCAATGTTACTTGAATCTTCTTTTTGG  
CTTTATTACTGCTAACAGCAGAAGATAGGGGGCTTCGGTCTTCCAATCTTCATTCAAGTTGCTTATCTGAGGTC  
CTCTACAACGGAGCTGAGCTTTGGGGGGTATTCCGAAGAAGAATTAGGGTTGTTGATAGAACAAGATGACTT  
AAAAGCTTCAATATGAGACTGGCATTTCAAATAGTCGCCTTTATTTTCTTCCAAACATTTCTTCAGAGCCTCCA  
CATCGCATGCTTTCTTCTTCACACTCTTGTTTTCCTTCTCCGTTTTCCCCTCCATTTTT

>TCONS\_00054054

CAAAGAAAAATGGAGGGGAAAACGGAGAAGGAAAAACAAGAGTGTGAAGAAGAAAGCATGCGATGTGGAG  
GCTCTGAAGAAATGTTTGAAGAAAATAAAGGCGACTATTTGAAATGCCAGTCTCATATTGAAGCTTTTAAGT  
CATCTTGTTCTATCAACAACCCTAATTCTTCTTCGGAATACCCCCAAAGCTCAGCTCCGTTGTAGAGGACCTC  
AGATAAGCAACTTGAATGAAGATTGGAAGACCGAAGCCCCCTATCTTCTGCTGTTAGCAGTAATAAAGCCAA  
AAAGAAGATTCAAGTAACATTGCACAACACTAGTCTATAGTCTTCTATTCTATGTAATTTCTTCGGCTTTAAC

>TCONS\_00054074

AACTGAACATGTTCCGAAGGAATTCAACAAATGATAGGTGTCATGTCCTTAGAGCATTCTCTGGGTCTGAAAC  
TACATCTTGGGTATCTGAAGGTTGGTGTCTTCACCAGTAATCCCGACACGAGCACAATCCGTCTTTTAAATGA  
TGAAACCTCTTAGCATCTCGCATAATAATTTCCCGACCAACAAGCCTCGAAGCAATCTTCAATGCATTATGGC  
AATCACCACAGACACGCAGATTCTTTATTATTTCGGATTGGTGATCGTGCAGAGCTACTCATAAGACCTTGAGC  
AAAAGCAAGTCTCTCGCTGTGAGCCATTAAAGCGTCCTCTTTAGTTTCTTGGTCTACGTCATGTAACACAAAC  
TTAATCTCTGGTATATAACCGTCCTCCTTCATTAGCTGCTTTAAACCCCTAAGCAATTCATATATCTTCTCATGG  
TCGGGATGTGATCTATCTCCTGCTCGATATTCATGGACTCTGCTTCTAGCCTCAAGAAGACTTTGAGCAGATTT  
TTTCTTTTCTTTGTCTTAGCAATATCTGATGCTTTTACAGCTAAAAAACCTGCCTTTGACTGTTTCATCCAAACG  
AGATGGATCTAGGAGTTCAACAATCTCAGCACAACGATCCCCAAGCTCCAAGTTCCTCATGAATTCTACAGAG  
ATTCATCATGGTTTCCCATACTTCAATACTTGGCTCTATAGGCATTTTTTCAATGAACTCTATCGCTTCAATAAG  
ATATCCTGTACTTCCCAACATATCTACCACTCCCACATAATGCTCCATGGAGTGAACAATACCATAATCTTTA  
CTCATTGATTCAAAGTGCAACATGCCTTCAACTATATCACCTACAACACTACAAGCATGAAAGACACCCAGA  
TACATTTGGCCATCAGGTTTCATCCCCGTTTTCTTGAATTCTGCAAATAAATTCTATTGCGTCTTCTCCAAGACCA  
TTCTTAGCAAGCCAAGTAATCATCGTGTCCCAAGAAGTCAGATTACGCTGAGGCATTTTTTGAAACACCGAA  
AAGGCATCATTCATGGAGCCACATTTGCCATACATTTCAAGAATCTTATTGTACGTTTTGACGTCAAGATGAG  
GATGAGATCTCACAAGGTGCTCATGAACTGATTTAGCCTCCTCAAGGGATTTATCCTCACCACAGACATCCAT  
TAGTGTTATATATCGAGACAAATTGACTGTGACATGTTGCTGCTCCAACAAATGCAAAACTTCAACTGCCTCC  
TTCACTTTGCCTTCTTTACAAAAGTTATCGAGCTCGTCAATTGAGCCTTTTTTAATGCTGCTATCAGCAGAATC  
GATTGACTGTTCAACAGGTGTTGAACTTCTCATTTCTTGATTACCTACTATTCCATTCTGAGATTGATAAGAAG  
CTTGATGTCCAGTACTAGAAGGGTTAAAGCCGCTTACATTCTGCTGATATTGCCCCATCATCTCCCTTGAGTAA  
CCACTTGAATTCGTATGCCTTTCCATATCATACGCACTTGCACTTTGTGGATACGTTTCAGAATTTCTGCTTGA  
ACATTCCTTACATTTCCAGGGATATA

>TCONS\_00054346

ACTCTTTCTTGTTTTTGAAGATCCTTCACATTCTGAAGGATGTAGTCAATGAACTTCTGAAACAATGGACTG  
CATAGATTTGGTAAAGGCCACCTTCCTGGATCCAGTGAAAGGAGAACTCATAACCTTGTTTGACTTCAGCAG  
AAGATAAGTCTGCCCTTGACCTGAAATACTATCTCCGACTTGCAATTCCATGTCCTCGCAACTTCCCATCCTTA  
ATCCTCCCTTTTTGAGTTGCCCAATACAAAAATGTATCAAGAAATCTCCTCTCTATTTACAGACATTTGTTATCTC  
GCGGAGTTGTCTTAGAATGGTGACAGAGCTCTGGATGATTGTTGTGTTCTTCTTCTTATTATGATAAAAAAG  
CTGCAAGAATGATCATGGACCTTTGGTAACTTTGACAGAGCAGAAAGAAATGATGTAGGCTTCACACCCTTA

TTACCAATTTGTTCTACACATAAGTTTCCTGCTTAGTATATTGTTGCTGAGCGTTTACCAAAAAGAAGAATGAA  
CAAGAGATTTGAAGAGTA

>TCONS\_00054354

GGAAGTCACTTCCTTTCATGCATATAACTTCATCCCGAAGTTTGACTTTGTGTATAATTGTTATTAACACGACG  
TTTATAAAATCTCGCTCGCCCTCTTCCTCGGGTTGGAATTGCTTGCTCCATAGGCTTATCATCCACAGAACCAA  
TAGTTGTAACACAAGAGGCCTCTAAAGTCATCTGGCTAGGGGTATTATCATAGTTAACCTGTCGATCAGGACG  
GGCAGGGGAGTGGTGTATGTCGTCATCATCAAACCCGCTCTCCAAAATTATTCATATCAAACCTGCTGAGAGGG  
TGGGATCTGATAAAGTACAAGTTGAATGTCAACATTATGCAATTCAGAACCATCCCCATCCCCATCCCCATCC  
CCAAAATGTGTTGAACTAGATGCCATATCAAAACGGGGCTCTGCAAACCTGTGATGAATCCATACCAAGCTCA  
GCTTCAACATTTAAATTTCCATCACCTTAAACAGAACCACCTGCACCACGATCACGCTCCAAATCCGAATTTG  
TATTAGACATTTAGACCTTTCTTCAACATTAGTTGCTGCTATCGCACGTCTCTTTTTGCGTCTCCCTGCCCTTC  
CACGTTTATGTGGATTAACAGCATGATCAACTACAGGCTGCTCAACTGGAACATACATTGGCTGAACACGAA  
GCCTCTGAGCCTCGATTGCTGCTGTCAAACCATCACTGCACATCTCCATGACTTTCTTCCTGCAACCTCCATT  
GATGGTTGTTGTCGCAATTCAATACCATATTGATATATCATATGCAACTGACGTGCCATAACCTCCGCCACTG  
GTGCAAGGGATGCATACCCTTTTGGAAATCGGATACTGGGATTTCCGATAATCTGTGCGAGTAATCCGACGATA  
CCAGACAAGGTAATCATCATCATATGCAACGGGTCCATCTGCTAGCCGGGCTTCACAAACTCGGTTAGCAGC  
ATCATTCCAGACAAGTATGGGCCTCGCATGTTCTCTAGCCCAATCCGTGTTTTGTCGGCCACGACGATCATGC  
ATGTCGTGATTGTCTGCAAAATTGCAGGAAACAGGTATGACTTGACCCATTCCGAATTGTCTGAGGACCCTGT  
TGGGCTGATGCATCTCCAACACGTCCCAACATAGGAGCGGCACCACAGCACGCCAAAAGTACTCTCCTGATC  
GGCAATACTCGGGAAGATTCTCCATCACATCTGGAGTATACGGCTCCCAAAACAAAATGTTTCATCAACGAGGT  
TATCTAGCTGGTCCCGAAACAATGGCAACACGTATTGCGTCGTATGTGTCCAATAAGATGAACGTTCCATTT  
ACATGCGTGTGGTGGACCAGGGAGATCATTGCAAAATGTAATAGCACCTCTCTTGCCTGACGTCTGTCTGGA  
TGAACCATCTTCAGTCTCTCCCATGCCCATACCTGTAGAAGTGGTATGAAGCCACATAACTCATTGTTTTTTGG  
CCGGGTAGCTCTACACAATGCACGGTACAAGCACGCCAACACAGCACTACCCCAACTATACATACCAATCTG  
CGTGATGTCATCGAGCAGCGTCAAGTACATTAACCTTGTTCCTGATGTGTCAGGAAACAGTATACCC  
CCGATCATCCATAACATATAGCACCTAGCCCTCTGATGTACAACCTACCTCATCTGCATCATCATCTAGCAAAG  
GCAGTTGCTCCATGTATGTAGCTAGTGCATAATCTCAAGCCTACTACCAAATAAACAATCACTATGTGGTCT  
AAAACCAAGCAACGCGTCGCACATATCCTGCCACTCTTCGGTCTTTCTTGTACTATCAATGCCCAATACTGGC  
CTTCCCTCTACTGGCAATCCATACAAAATAGCTACATCCTGTAGCGTAATAGTGGCTTCCCCAACTCTTAGGT  
GAAAAGTATGCGTCTCCGGACGCCATCTCTCAACAAGAGAAGTAATAAAAGCATGGTCTAATTGTATACGTC  
CTACTCGATAGACCCCGTAAAATCCTGCATCAATTAATATTTGCAGGACACGTCGATGAATTGGACGATCATG  
AACCAAATTCCAAAATTACCATCTGATCGTCTACATAAAATAGGCTTTTCCACCTCACCATTCCATACGTCC  
TTCGACCTGTGATGGTTTTGTCTTGTCTAGTACGCTATGGTCTAACGGCCCAGGATGTAGCTGTGTCAACCTCTG  
ATCCTCCATG

>TCONS\_00054358

AAGAGATGCATTAATAATTTCAAGATAAAAGGTTCCAACATCAGAGATGCACATGTGATCCACGGAATAGAG  
TTCAAAGTCCTCGCTGACTTACCACTACTAAATATATGGGAATTCACATGTCTTTGGGGCTCCGCGGTACAGGT  
CTAGTAATAAAGTGACCCTTCCCACCAATTCCCTCTAGAAGCACTATATTGGTCGTTTCCACCAGAATCATAT  
TCTCCTCCTTCTTCTTGTA

>TCONS\_00054520

TTTCGTTATTCAAAAATGGTGCAAATCAACACCGTAGACTGTCGAAGAATTTCAATTTCCATGGAACTTTACGC  
TGGATACTAAAATTATAGAGTTCAATTTTGTCAATTCATTTTCTATGGTTTGTGTAGCCCCGTTCCACTGTGAA



CGCCTCCATAACTAGTAAGTCACTGGAGCTATGGTTTTTCATGCCTTTGTTATTCCAATTTATGTTAAATCTATG  
AAATGTTAATTTAGTTAATTCAGATCTTACCATCGGGTTATTTTAGAGAGAGCTTGGAGTTAACT

>TCONS\_00054552

AACAAACACGACCAACTTGCCTCTGATAAACCACCTTGATGTATCGTCAGTTGCTTTATGTAGAATCCTCAGC  
AGATTTTGGTTCATCTTTTGAAGTTCAGTGCAGGCGCAAGGTGATGGAGAACCCTTCTTGGCCCATTTTCAGTTCTCA  
AATCGTTGATGCTCTGCTCCAATTCATCAATCCGGTTCCCATCTCATCAATTTTGGAGATGATTGATTTCAGAC  
ATTGTCTGAAACCTGGTTTGCATTTGCTGAAGAAGATTCTGGACAAACACAGTCATATCAGCAGTGCTTTGTTT  
CGTATTATCTGCATCATGCCCCGTCCTGCAAAATGATCCAGAACTATGGGTCAGAAG

>TCONS\_00054613

GGGTGCTATTTCTTCAGAGATACTCCATTTAATCGAACTTAAATGAATAGAACAAAAGATTACTGTTTCTCCA  
CTTCTTTCTGCTTGATTCCATCAATGCTTTCTAATGGAGGCAGAGTCAGATCAGGTTTGAAAAAGTTGTGAACA  
ACGGAGGCACCAGCAAGGAGGGGAAACAACGACAACAACAGTAGACCAAGCCATTGATGGAGTCCCTGTTG  
G

>TCONS\_00054623

TCGTCTAATAAAGAAGTGGCTTAGAGATTAGTAAGTTGATTGTTGGTCCCAGTTGGTGGCTTGTTTCCCTATCT  
TGTGAAGAACTTTGATGACCTCTTCAGTAGTCACATTTCCAGTTACTGTACCTTATTTAGTTGTTTATCCACAT  
CATATGTTTCAATATCTTCAATTTTCTTGATTGCCTTCAAGATTTTCTTGATGCATTCGTACAGTGCAGACCAA  
CTTTAAGCTCCACTACCTAGTGCACAAATGAAAAGT

>TCONS\_00054632

CCGCTTTATTTGCATCAGGTTCTCTCATCCACTAGAACAACAGCCTCCCCCTGCTGCCGTCGTTCTAATTCA  
CCCTCGTGCAGTTTGATATTTGCCCTAAGCTTTTACCTCCATCGCGTAACCTAGCACCAATGGTGCCGGACA  
GAGACCTTTTAAGCCTCCTAATTTTTTCGGTCAATTCGGTATTTGATAAGTTGGAAAGTACTTCTTTGTGCTCCT  
CTCCG

>TCONS\_00054855

CAGAGAATTTTGGGAAGTGGCAAACCTTGCGGAGAATGTCCACTGAAAGAGACCTTCCACTGAATGGCTCTAC  
GACTTGATCTCTCAGTGAACAGCACCCACCAAGTTCCCAAATCGATGGAAACCCGTCTGTAATACCTGCATT  
ATGCATCACTGTGATCTGAAGCTTCCTCAGAATCAGACAAGGGCAAGAGGGTACATATCCCAAGCACATGCC  
CGTTAAGGCACACATAATACTCAATTGCATCTTCATAAGCACCCAATCTACAGCTGGCACTAGCTGGCATCAT  
TTTTGCTTGACAGCATGCTCCACAGTTTCGCCTTACAGTAAGGGCACACTTCTGTTGGATGGAGCTGAGCCTCCC  
TCTTAATCAACATTTTACGAACCTTTTGAGGAAGCAAAGGATTTAAATATTCTCGAAAAAATCCAATATCCCC  
CTCATCTCCTTGGTCAAGATGCTCGCAAGGATCAGAAACATACAAAACATCTGTCCTGCATTGTGGTAACAG  
AAAGCTCTTTCCAGAGGTCCTAGAGAACCTAGTTCTATAAACAAAGTGTCTGGAATGTGGATGCTATTGAAT  
AAGCCACCTTTATTACATCCAGAGCAGTAAATAAGAAGCTTTCCAAGAGCCCTCCAGTTCCCATCAACACTAT  
GACTCCCACTAGACTGTAAATCAAGCATCATTTTGGGAGCTCTAGTCTTACAAAACCTCTTCCAGAGCACTCT  
CTTGGCAAGGTCATCAAACCATTTGCATACACAAGATAAAGTTGCAATTGACTTAGGATTCCAATTCAACTGC  
TGAAAAACCAGAAATATAATTTCTTCGCTAAGATGCCCTTTTGTACACTTACAACCTTGCTGAGTGTATGCAGC  
GATACTGCTTAGTAATGATCATCGTCTACAACTGCAGCCACCACAATTGAAATGACAACAAAAGTTAGATCA  
TA

>TCONS\_00054856

TGGTGTAACTTAACTGCTTCACAACAAACATCAATGAAATGTTACAGATTCCAACGTGTCACTCAAATAAGAT  
GCACATTTGAGATCATAAAATATACAAAGAAATTCTGATGGTGCTTTGTTACAACCTGAGACACAATGGACAG  
GAATAGGTTTCTATTGGACTGCGCTTGTGAGAGAATTTTGGGAAGTGGCAAACCTTGCGGAGAATGTCCACTGA

AAGAGACCTTCCACTGAATGGCTCTACGACTTGATCTCTCAGTGAACAGCACCCACCAAGTTCCCAAATCGA  
TGGAACCCGCTCTCTAACACCTGCATTCATGCATCACTGTGATCTGAAGCTTCCTCAGAATCAGACAAGGGCA  
AGAGGGTACATATCCCAAGCACATGCCCGTTAAGGCACACATAATACTCAATTGCATCTTCATAAGCACCCA  
ATCTACAGCTGGCACTAGCTGGCATCATTTTTGCTTGCGAGCATGCTCCACAGTTTTGCGCTTACAGTAAGGGCA  
CACTTCTGTTGGATGGAGCTGAGCCTCCCTCTTAATCAACATTTTACGAACTTTTGAGGAAGCAAAGGATTTA  
AATATTCCTCGAAAAATCCAATATCCCCCTCATCTCCTTGGTCAAGATGCTCGCAAGGATCAGAAACATAC  
AAAACATCTGTCCTGCATTGTGGTAACAGAAAGCTCTTCCAGAGGTCCTAGAGAACCTAGTTCTATAAACA  
AAGTGTCTGGAATGTGGATGCTATTGAATAAGCCACCTTTATTACATCCAGAGCAGTAAATAAGAAGCTTTC  
CAAGAGCCCTCCAGTTCCCATCAACACTATGACTCCCACTAGACTGTAAATCAAGCATCATTTTGGGAGCTCT  
AGTCTTACAAAACCTCTTCCAGAGCACTCTCTTGGCAAGGTCATCAAACCATTTGCATACACAAGATAAAGTT  
GCAATTGACTTAGGATTCCAATTCAACTGCTGAAAAACCAGAAATATAATTTCTTCGCTAAGATGCCCTTTTG  
TACACTTACAACTTGCTGAGTGTATGCAGCGATACTGCTTAGTAATGATCATCGTCTACAACTGCAGCCACCA  
CAATTGAAATGACAACAAAAGTTAGATCATA

>TCONS\_00054891

AATTCTTGGAACGGAACAAAATAAAGTTGGGTCTGAATGAATAAATGGATAGGGCTGCGGCTTCAATTAAATT  
ATAGGGAAAGAAAAAGCAACGAGCTTTTGTCTTAATTTGAATGATTCCCGATCTAATTAGACGGTAAAAAT  
AGCATGTCGTATCAACGGAAGTTCTGAGAATATTTTATTGTTCTTAGATGGGTAGAAAACCGTGTTAGAATT  
CTTGGAACGGAACAAAATAAAGTTGGGTCTGAATGAATAAATGGATAGGGCTGCGGCTTCAATTAAATTATAG  
GGAAAGAAAAAGCAACGAGCTTTTGTCTTAATTTGAATGATTCCCGATCTAATTAGACGTTAAAAATTTATT  
AGTGCCTGATGCGGGAAGGGTTTCTTGTCCCATGAGTGGATTCTCGATTTTTTTAATGAATCCTAACTATTACC  
ATTTTCTATTATGGAGATGTGTGTGTAGAGAAGAAACAGTATATTGATAAAGA

>TCONS\_00054892

TTAGAATTCTTGGAACGGAACAAAATAAAGTTGGGTCTGAATGAATAAATGGATAGGGCTGCGGCTTCAATTA  
AATTATAGGGAAAGAAAAAGCAACGAGCTTTTGTCTTAATTTGAATGATTCCCGATCTAATTAGACGGAATG  
AATGGTAAAAATAGCATGTCGTATCAACGGAAGTTCTGAGAATATTTTATTGTTCTTAGATGGGTAGAAAA  
CCGTGTTAGAATTCTTGGAACGGAACAAAATAAAGTTGGGTCTGAATGAATAAATGGATAGGGCTGCGGCTTC  
AATTAAATTATAGGGAAAGAAAAAGCAACGAGCTTTTGTCTTAATTTGAATGATTCCCGATCTAATTAGACG  
TTAAAAATTTATTAGTGCCTGATGCGGGAAGGGTTTCTTGTCCCATGAGTGGATTCTCGATTTTTTTAATGAAT  
CCTAACTATTACCATTTTCTATTATGGAGATGTGTGTGTAGAGAAGAAACAGTATATTGATAAAGA

>TCONS\_00054893

TTAGAATTCTTGGAACGGAACAAAATAAAGTTGGGTCTGAATGAATAAATGGATAGGGCTGCGGCTTCAATTA  
AATTATAGGGAAAGAAAAAGCAACGAGCTTTTGTCTTAATTTGAATGATTCCCGATCTAATTAGACGTTAAA  
AATTTATTAGTGCCTGATGCGGGAAGGTGGGTCTGAATGAATAAATGGATAGGGCTGCGGCTTCAATTAAATT  
ATAGGGAAAGAAAAAGCAACGAGCTTTTGTCTTAATTTGAATGATTCCCGATCTAATTAGACGTTAAAAATT  
TATTAGTGCCTGATGCGGGAAGGGTTTCTTGTCCCATGAGTGGATTCTCGATTTTTTTAATGAATCCTAACTATT  
ACCATTTTCTATTATGGAGATGTGTGTGTAGAGAAGAAACAGTATATTGATAAAGA

>TCONS\_00054986

TTTGAGAGGAATTCTTGGAACCTATCCATGAACTAACTGATGCTCCACTTCTCTCCAGTTGTGCACTTTCTT  
AACCATGGGATGTCCATTAAGTGACTCACTCTTGGACCATGGATATGAATTTTCATAATCAAAAAGAAGAAC  
CTTGATTCCAGCTTCCGCGCACTCGATAGCATACCTTGGATTGTCATCAATCAAAACATTTGCTCCCAAGGAC  
CTGCAAATATCTGATTTAGCTATAGACTGCCCATTCATGCAAAGTGATTGCCAAAGTGCATATCCTGAAACA  
ATCCAGGATAATGCCTCTCAATCCACTCAATTGTGTGATCTTTAATGGCGTTTTGCCGGGACGTTACAATTGAC

AGGTTACAGAATCTAGACATCTTTTGAAGAGCCTGTCGAGCACCGGGAATTGGATGAATTCCCGTCTTGAAAT  
 AAGAGGTCTTGAAGAATTCATGGACACGGATATCAGCTTCATCTCTTGAGCATTTCATATCTTGAAAAATTC  
 ATAAACATGATATTCAGACACCGAGTGGTATGATGAATAACGATCTGCAATGAATTCGTTGAGAGCTGAAAC  
 AAAGTTCCCAAGGACTTCATCAACATCAACAGCCACAACAATTTTGTTCATGTAAATCCTGGTTAAAGAATCC  
 AGCACAGCTTCCTCTGTTAGATGTATTGCTGTTAGTATCAGAAGGCTTAGTAGCATTACTAGTACTAGCTCCCT  
 CTGCATCATCATCATGTAGCAAGAGAGGGAGAGATGGAGCAAAAGCATGTGCCCTCTGAAACCCATTACAT  
 ACTTATTGTTACAACCTTGTATTTGAATCATTAGAAGAAGAAGAAGAACAGCAGCCCCAAAGCCTGAGAGCCC  
 TCGCATTATTAAGGGTATTTTCTACACCACCACCACCATGTGAATCAATGGTAGTAGATAAAAACTTTAC  
 ACATGACAAAAGCTGAAAATCTTTAGGGCCAACAGAAAAGGTAGGTGCTATTGCCATTAAAGGACGAATCC  
 AATTATTACTTCTCCTTCTTATCATAACGATACTGGAAAAATGCCCTCCCACACATCTAGCAAGACCCACG  
 AA

>TCONS\_00055068

TTCCAATATAAAGGATTAGTCAATCAAATAATAGATAGTAAATGGGTTCGGTTTGAAAATAAATGAATTGCTA  
 GTCGTAGAATATTATTCTCGTCAGACTTAAACCTCAGACTGAAACCGAGGGTTCGGAAAATTTTCTTCCCTTTA  
 GGCGAAGTAAATTAACCTAAGGTTAAGTAAGATAAATCCGAGTTTGATCTGGATTTCCTCCATTTTGTATCA  
 TAGACCAAGGATCTATTTTCATTCTTGTCTACTCTTTCTTTTCAGTATTTTGATTATGATTATTTTGTAGTATT  
 CTATTTTACGCGTCACAGCAATTAGGAATTGAGAATCTATATCTTTAGATCAAAGAAGGGTCTAGCTGTTGGA  
 ATAATGGTATCCATTGCCCCGAGTGGGGATAGCATTTCTCTTCTGCATGTCCATGGAGTTTGAAAAATCCAAA  
 CATCTCAGAGATAGATAGAGAGGTAGGAATTTCTCGAACGAACCGCACTCCTTCGTATACGTTAGGAGTCCA  
 TTGATGAGAAGGGGCTGGGGAAAGCTTGAACCCAATTCTACGGTAATGAATATGAGCGCAATTGAAATTCC  
 TGGGGAGTTATACATTTGTGTATTGATAAGACCGTTTACTATTTCTTGAAGCTCAATCTCT

>TCONS\_00055074

TAGACAAGGAATGAAAATAGATCCTTGGTCTATGATACAAAAATGGGGGAAATCCAGATCAAACCTCGGATT  
 ATCTTACTTAACCTTAGGTTAATTTACTTCGCCTAAAGGGAAGAAAATTTTCCGAACCTCGGTTTCAGTCTGA  
 GGTTTAAGTCTGACGAGAATAATATTCTACGACTAGCAATTCATTTATTTTCAAACCGACCCATTTACTATCTA  
 TTATTTGATTGACTAA

>TCONS\_00055122

TCATTCAAAGATTTGTTTTCTTCTCGAGTTGAACGTAGCGCGGACAGTAATTCAGCCTTTGAAGAAGTTCCACC  
 TTTCAAGTCTTTCGCGTTCACTCCACCCCCAAATCCAAACACATGGCTACGAGTTTGAGGTCCACAACATTTT  
 CTACAATCTCTATGCTAGGTAGAGATGGATCAGCTTGAATCTTTCTTCGATTTGAGCATGTTTTTCAATTGCTT  
 CAGGTTCAACAAGCTTGTTATCTTTCTTACGGGTCTCAAAGAAAA

>TCONS\_00055158

TAGACGATGTAATGGCTCAACTAGATGATGTTATTGTACACAATAAAGACATCCTTTCGTGAAATAAAGGTTAC  
 ATTAGACATTAGTCCTAGTTCCAAATGGTAACCGTGCTCATGTGAGCTGAAGGACAATGCTCAGTTAAGGTGG  
 TACAAAATACTTAAGATAGTCCAATTTTCAGATGATATTAACCTTAAAGAGGAAATGACATCAACTCACCTTT  
 CTCTTGCTTCGACCAGAAGTGTTGGCAGTAGGAGTAGGTGTGCCATTATCCATAGGACAAGGAACCTCCTCCA  
 TTCCAGAGGTTTGATTACCCAAGCATTGGAGAGTCTCAAATTCACAGTTATTGAAGCCTTGTCATTTAATAC  
 AGTGCCGTCTGAGCTTTTAACTTCTGCACATTGCCGCTCTTCATCGGCTTCTGGTATGGAAATGATCCAATTC  
 CCCTTCAATCCTTCCTCGGATGTGACAAGCAAGCACTTGAGCCTAGCAACCTCAGCTTCCAATACAGCCTGA  
 CCCTGCAGCCTCTTGAATAGTTGCTGATTTATAGCCCTCAATCTGATAACCTCATCCTCTAATGAAGCAGCCC  
 GAGCTTTCTTTTCTCACGATACTTGCGAACGGCTTCTTATTACCCACGGGTCGTTTCTTCTTCTTCTCTGA  
 AGACTCTGCAGTATCATCACTGGGGTTCTTATCCTCGTCCTCCTCCGAGGGAGGCACGAATTTGGTGTGAACA

TGGTAACAAGTGTGTGTATGAGAATTATCAGGGCCAGGCGGGTTGCAAGTGTGGGCGTGAGTGCAGGCATGC  
GTATCCTTGAGAATATCATTGAAAAAGCTGTCCATGGAACACTAAATTACCAAAAATTTCGAACCTTGATAAC  
ATTTCTTGGTTAGAAAATTCCAGCTCTCCGTCAGCCATCATAGCAATCCCAAAAGTAGTAACCAGTAAGGTGA  
CAATAGTGAAGCAGAGTCTGATGAAGAGGAGAGAAAAAGAGAGAAAAATAGGGTCAGAGATAATGAAAAA  
AGAGGAACCCTAGAAAGGGCTAAAAAGGGGGAGTTGAGATGTATTGTCAAATCTTTAATGGCGGAAAAAA  
AAGAATGGAGGAAACAGAAGGGGCCACTAGTCAAGATTCCACACACACATGCACAACACTTGCTGCTACTG  
CAAAATTCAGCTCCGTTTG

>TCONS\_00055201

TTGTAAATAGAAATTGATAGGAGCATTGTCAACAACAAAATTCTCCAAGTTGCAGTATGCTGCAGAAACGAA  
CTGTCTTCACAGCCTCCTTCCCCTTCTACCACCTTTCTGCGAGTGCTATCTGTGGGAATTGGAGTCACATCCTC  
TATGCGTCCAATTTTCATGCCAGATCGAGCCAAAGCCCTAAGAGCAGACTGGGCACCAGGACCAGGAGTCTT  
AGTCTTGTTACCTCCGGTAGCCCGAAGCTTAATGTGAAGAGCATTAAATCCAAGTTCCTTGCATCGCTGAGAC  
ACATCCTGAGCTGCAAGCATGGCAGCATATGGAGAAGATTCTCTATCAGCCTTCACCTTCATTCCACCAG  
TAATGCGAACCATAGTTTCTCTTCCAGACAAATCAGTTACGTGAATGAATGTATCGTTGAAAGAGGCCAAAAA  
TGTGAGCAACACCGAACACCAATTCACCTCCCTCGTCGCTGGACCAAGTGTTACGGTCTCTTCCCTTTGGCTC  
CCTAGTCTTTCTCCTCGACATGGATTCTGGCTGGGATTGGTAGTGAGAAGCTCAAGAGATACTGAAACAGCTAG  
CGAATAACCCTAGTTT

>TCONS\_00055324

TACTGGTCTAAACAAGAACCCCGTAATCATTCTGTTGGGCAATGTCTCTCTAGTTTCATGGGAGACCTGGGG  
AACACATCAATTGAAGCATGAGGCTTATCTTCTGCTACTTCACTGGAGAGCCGGCCATCTTCTTCAGCTAGA  
TGATGGAAGTGTGATTTCGTCAAGTCCATTAGCATCTTCGCAAAGCTCCAAATCATCGACACTGTGAGCCACAT  
GAGATATCCGGCCGTGATCATCCTCACTTACTGTAATACATAAATCATCACTGCCCATGTGATATAGGTGAGA  
GTCATCTGCATCAAAAGTTGCAGCAGGTAACCGAGATTGCACAGGTATCCCTGCTGCATAATATTGCTCTATC  
TCTTCTTTCCGCTTACGTTTGCCCATCCCCTTCTTCTTACTCTCTCTTCCACGTACTCTTTTCCAACCTTCACT  
TTGTGAGTTTGTGCAACAACACTACTGTACTTGCAATCTGATCCCTCAAGCATTGATAAGTAATATATCGGATTC  
TTGTGACAGATTGTAACCTGTTGATCATCCATCCCATGAGTTGAAAGGGTGTCTGCTATAAGGGCAATCTCCCT  
CAGTGCGGCATTCACTTTTGAACCTCAGATGAGATAGGCACAGGCCTCCCCACCAACTTCTTGTAACTCTC  
AAATACCACTGCATGTATTCACTTTCTTCCACATCTTCTCTGCCTCCACAATGTAGAGATGGCGATTGACCA  
TTCATTAAGCTCTGACTCCATTTTGTGAGAGATCTACACCACCATCAACTCCCCGGCTCTTCTTCCCACTT  
TTGTACCTCTTCAGGGACTGTCTGATGCATGCCAAACTGCCTTAGGCAACGATCCGGAAGGTGCCTTTCAGCC  
TTGTCATAACATATCAACATGGTCTTTGATCTCCCGAGAATGAGGCTGCGTAATATATGTTCTGGTATGACAGT  
GTGACTAATGTTTGAGTAAGGACACCAGTCAACGTCAGATGGCTTCATAGAGTCCAATGCTTTTCCGTAGAAAT  
GCCACATCACGTTTGATGTTGGACTGCTTTGTTTACCTTTCACCTAAGTACAAATGGGAAACATTCATGGAT  
TGGATCATGATTAAGCTTTGGCCGACCAACATTGAGGTGGTAGTAACCTCCAACACTGTAACAGTGTCAAACA  
GCCACTAATTGTGCTTTGAGACCTGAGGGAAGCATTCCCAAGCGCTCTGTACAAGAAGGATAAGGCTGCAGC  
ACCCCAAGCATACTTGCCAGCTGCATCAAAATTTTCAAACAATGGAAGGTACATGACTGGTACCTTATTGCCA  
GTGGTAGTTGAAAAAATTGTGCTACCGACAAGGTAAAGAAGATAAGCACGTGTATGACGCTCAATATCCTCC  
ATGGAAGCATCCTCAGGACACTGAGAGAAGGTCTCTTTCAACCAACTAAGCTTCACCATCCCACCACTCGTA  
TATCCCGAGTCAGGTGCTTTCCCCAACAACCTGATACAGACTGCTTCACATGAAGTATATGTCACACCTATAA  
CAGCTTCACCATCAACTGGTAGTCCAAGCAAGTAGGCGACATCCTCAAGGGTCACAGTCATTTCCCCAACAG  
TGAAATGGAATGTGTTAGTTTCTCTCCTCCATCTCTCAACTAGAGCAGAAATGAGTGGGTTATCCAAACTAAT  
TGCCGGTATCATTCTTAAATAGCCAAATCCAGCCTTCTTAACCAACTCAATCTGTTTCTCCGTGAGCATCCACT

GATCGAGCTTTGATGTGTGTTTCATGGCACCTAAGAGCACTACGCTCCTGCCCTTCCCAAATAGCAGATGATAC  
 ATGTTTATCTTGATCGTACAACACAACATCATCAATAGGTCCAGGATTAGTTGCATAGTAGTCCACCATCACT  
 ACTTATGACATATCAGTTAAACCAGCAAGTCAAGGCAATGGGCGATGAATTTATGTCTGTGTCTCTCTTCGTG  
 TATGTGTGTGTGTAGAGAAAGAGATAGAGTGACAAAGAGAGAGATGAAGGGTCAACGGAGAAGAAGATCG  
 CCGGAGAAGAGATCGACGGAGATGGAGTTGAGAATCGGCGAGGCACAATTAGG

>TCONS\_00055325

CTTAGAAAGAATATCATCCCTTACAGAATAAAAATCTCATCTTTACTGGTCTAAACAAGAACCCCGTAATCAT  
 TCTGTTGGGCAATGTCCTCTCTAGTTTCATGGGAGACCTGGGGAACAACATCAATTGAAGCATGAGGCTTATC  
 TTCTGCTACTTCACTGGAGAGCCGGCCATCTTCTTCAGCTAGATGATGGAAGTGTGATTTCGTCAAGTCCATTAG  
 CATCTTCGCAAAGCTCCAAATCATCGACACTGTGAGCCACATGAGATATCCGGCCGTGATCATCTCACTTAC  
 TGTAAATACATAAATCATCACTGCCCATGTGATATAGGTGAGAGTCATCTGCATCAAAAGTTGCAGCAGGTAA  
 CCGAGATTGCACAGGTATCCCTGCTGCATAATATTGCTCTATCTCTTCTTCCGCTTACGTTTGCCCATCCCCCT  
 CCTTCTTACTCTCTCCTTTCCACGTACTCTCTTTCCAACCTTCACTTTGTGAGTTTGTGCAACAACACTACTGTACTT  
 GCAATCTGATCCCTCAAGCATTTCATAAGTAATATATCGGATTCTTGTGACAGATTGTAAGTGTGATCATCCAT  
 CCCATGAGTTGAAAGGGTGTCTGCTATAAGGGCAATCTCCCTCAGTGCGGCATTTCATTCTTTGAAACTCAGAT  
 GAGATAGGCACAGGCCTCCCCACCAACTTCCTTGTAAGTCTCAAATACCACTGCATGTATTCACTTTCTTCCA  
 CATCTTCCTCTGCCTCCACAATGTAGAGATGGCGATTTCGACCATTCATTAAGCTCTGACTCCATTTTTGTGAG  
 AGATCTACACCACCATCAACTCCCCGGCTCTTCTTTCCCACTTTTGTACCTCTTCAGGGACTGTCTGATGCAT  
 GCCAAACTGCCTTAGGCAACGATCCGGAAGGTGCCTTTACGCTTGTGCATAACATATCAACATGGTCTTTGAT  
 CTCCCGAGAATGAGGCTGCGTAATATATGTTCTGGTATGACAGTGTGACTAATGTTTGAGTAAGGACACCAGT  
 CAACGTCAGATGGCTTCATAGAGTCCAATGCTTTTCGGTAGAATGCCACATCACGGTTTGATGTTGGACTGCT  
 TTGTTTACCTTTCCACCTAAGTACAAATGGGAAACATTCATGGATTGGATCATGATTAAGCTTTGGCCGACCA  
 ACATTGAGGTGGTAGTAAGTCCAACACTGTAACAGTGTCAAACAGCCACTAATTGTGCTTTGAGACCTGAGG  
 GAAGCATTCCCAAGCGCTCTGTACAAGAAGGATAAGGCTGCAGCACCCCAAGCATACTTGCCAGCTGCATCA  
 AAATTTTCAAACAATGGAAGGTACATGACTGGTACCTTATTGCCAGTGGTAGTTGAAAAAATTGTGCTACCGA  
 CAAGGTAAAGAAGATAAGCACGTGTATGACGCTCAATATCCTCCATGGAAGCATCCTCAGGACACTGAGAG  
 AAGGTCTCTTTCAACCAACTAAGCTTCACCATCCCACTCGTATATCCCGAGTCAGGTGCTTTCCCCAACA  
 ACCTGATACAGACTGCTTCACATGAAGTATATGTCACACCTATAACAGCTTCACCATCAACTGGTAGTCCAAG  
 CAAGTAGGCGACATCCTCAAGGGTCACAGTCATTTCCCCAACAGTGAAATGGAATGTGTTAGTTTCTCTCCTC  
 CATCTCTCAACTAGAGCAGAAATGAGTGGGTATCCAAACTAATTGCCGGTATCATTCTTAAATAGCCAAATC  
 CAGCCTTCTTAACCAACTCAATCTGTTTCTCCGTGAGCATCCACTGATCGAGCTTTGATGTGTGTTTCATGGCAC  
 CTAAGAGCACTACGCTCCTGCCCTTCCCAAATAGCAGATGATACATGTTTATCTTGATCGTACAACACAACAT  
 CATCAATAGGTCCAGGATTAGTTGCATAGTAGTCCACCATCACTACTTATGACATATCTCAGTTAAACCAGCA  
 AGTCAAGGCAATGGGCGATGAATTTATGTCTGTGTCTCTCTTCGTGTATGTGTGTGTGTAGAGAAAGAGATAG  
 AGTGACAAAGAGAGAGATGAAGGGTCAACGGAGAAGAAGATCGCCGGAGAAGAGATCGACGGAGATGGA  
 GTTGAGAATCGGCGAGGCACAATTAGG

>TCONS\_00055359

CTCTTCAACATTTTTGTTCACTTCTCTTCTCCGGTTTTTCAACAAAAGTCTTCCTCAACCAGTCCCATGGCTGG  
 ACGATCCAAAGGGCGGTGGTAGTGGCGGCGACACCCCAAGTAGCGGCGGCCTGTATATCGGTGGACTGAGG  
 ACGCAATTTGGGGCGCAGGAACCTGAAGATCCCGGGACTGGTCATCTTCGGCGTTGTAAATTTCTCCGTTAC  
 TGTAAGTGAAGTGAACGATGAGCCCTCGA

>TCONS\_00055374

>TCONS\_00055387

>TCONS 00055481

>TCONS 00055486

>TCONS 00055487

>TCONS 00055488

[illegible]

[illegible][illegible][illegible]

AACCCCTGAACCCCTGAACCCCTGAACCCCTAAACCCCTAAACCCCTAAACCCCTAAACCCGAAACCCCTAA  
ACCCCTAAACCCCTAACCCCTAAACCCCTAAACCCCTAAACCCCTAAACCCCTAAACCCCTAAACCCCTAAAC  
CCTAAACCCCTAAAACCTAAACCCCTAAACCCCTAAACCCCTAAACCCCTAAACCCCTAAACCCCTAAACCC  
TAAACACCAACCACCTAAACTACCCTAACTCCTAAACCACTAAACCCCTAAACCCCTAAACCCCTAAACCCCTAA  
TCCTAAACCCCTAAA

TGAACCCTGAACCCTGAACCCTGAACCCTGAACCCTAAACCCTAAACCCTAAACCCTAAACCCTA  
AACCCCTAAACCCAAAACCCTAAACCCTAAACCCTAAACCCTAAACCCTAAACCCTAAACCCTA  
AACCCCTAAACACTAAACCCTAAACCCTAAACCCTAAACCCTAAACCCTAAACCCTAAACCCTAA

[illegible]

AAACCTAAACCCTAAACCCGAAACCTAAACCCTAAACCCCTAACCCCTAAACCCTAAACCCTAAACCCTAAACCCTAA  
ACCCTAAACCCTAAACCCTAAACCCTAAACCCTAAACCCTAAAACCTAAACCCTAAACCCTAAACCCTAAACCCTAAAC  
CCTAAACCCTAAACCCTAAACCCCTAACCCCTAAACCCTAAACCCTAAACCCTAAACCCTAAACCCTAAACCCTAAACC  
CTAAACCCTAAACCCTAAACCCTAAAACCTAAACCCTAAACCCTAAACCCTAAACCCTAA

CCTGAACCCTAAACCCTAAACCCTAAACCCTAAACCCTAAACCCCTAAACCGAAACCCTAAACCCTAAACCC  
CTAACCCTAAACCCTAAACCCTAAACCCTAAACCCTAAACCCTAAACCCTAAACCCTAAACCCTAAACCCTAA

>TCONS 00055655

>TCONS 00055656

>TCONS 00055658

>TCONS 00056051

>TCONS 00056052

GTGCTTAAGCATGTGAAGGAGTGATAATGAGAGCAACTTTTCTCTTCCATCGAAACTTGTTTTTCTAACACCAT  
GACCAAATCTATCACAGAGAACATCTGCCATAAACTAAGAAGACCTAGCGAATCCCAAACCTGGACACCCA  
GTAATTCGGACAATATCTCCACGCTTCACACCAGAATGAAATTTAATAAACGCGTCTTCATTCAATTCAGAAT



CCCTCGCACTTGCCATAACTTGAACCTTTGGCACCTCCACCATGTAAATCATAGAAAAGCAGCTTTGCAGAAG  
ACGCGCGTTTATTCATTATCC

>TCONS\_00056060

ATTTTATTGAGTTTTCTTTCTCCATCCCAGCAATAAAAAGCCTCGGGAGGAATCTGCCAAGCCTCATGATGG  
ACAAGCAAAACCTCAGGATGGACCTACAACACAAGATGTGGAAGCAGGTGTCACAGCTCACAATGAAG  
ATCATAAATATTTGACGTTGAGTTTCTGCTGCTCCTGGAGTAGCTTCTTTTGCAGCTATCTTTTGCAGTTTGGAT  
TTATGATAATTGTCAATTGTATGGCAAATGCTAGCCTTAATTTGTTAGTATTGGAACTTTGGTCATA

>TCONS\_00056061

ATTTTATTGAGTTTTCTTTCTCCATCCCAGCAATAAAAAGCCTCGGGAGGAATCTGCCAAGCCTCATGATGG  
ACAAGCAAAACCTCAGGATGGACCTACAACACAAGGAGAGAACTACCTACTAACGTGCTCATGCATTGGTA  
CAGATGTGGAAGCAGGTGTCACAGCTCACAATGAAGATCATAAATATTTGACGTTGAGTTTCTGCTGCTCC  
TGGAGTAGCTTCTTTTGCAGCTATCTTTTGCAGTTTGGATTTATGATAATTGTCAATTGTATGGCAAATGCTAG  
CCTTAATTTGTTAGTATTGGAACTTTGGTCATA

>TCONS\_00056097

GTTTCATCCTTTTCGCCTTCTACCTTATTTTGCAGATTCGTTTGCTTCCGTAGTAGTACTTTTATTTTCTATCGGG  
CATTGGGATACATAAGGTTTCAGCTTGAAGTCAGTCAAATCTGGAAGTACATAGTTAGGCAGCTTCTCTTGCA  
TAACAACATAACCACCTTTGCGAGTGTGAAAACCAGTAGGCTTGCAATTCTTCCCTTGTAGTAGCCCCGAGG  
AACCCTTTTGAAGTAAGAATATCGAGAGACGAAGTACGTTTCTTCTGAAAGTTCTCCCTAAACCTAATAGC  
AGTCCCAGCGGCATTGTCTTCTAATTTAAAA

>TCONS\_00056134

GGTAACCAACTTCATTAGGAGGCAAGCTATAACTCTTGAAAATAGGATCTTGATTCACACTTCCTGGATTCT  
TAATGTCTTGCCAACGTCGAATTTGATCGTAGTGAAACAATATGAACTCGATCACGAACAGAGTTGATGAA  
GATGCAAAGTACTCAGATTTTCCAGCATCATACCATTTTGGTACGTTAAGGAGTCCAGCACTAGTGAGAACCT  
CAGGCAGTAGCATTCTAGCAACACCTAACATGGCCCATAGACCGTTCACTAGCTCGGCTTGAACGAACCATT  
TCAAGTTCTCTGGGTCCTCAGCGAGCCCCAGTGGATCGAAACCATTGTCACCAGCGAGTCTGCCATCAAGAT  
AAGTAGGAGAGGTTAAGCCTGGAAGCCATTACCTTTCTTAGCTTCAACTTTAAATGAGTTGTAAGATGAAGT  
TGATGGTTTAAAAACACCTCCCTATTTAGTTTACCAGATGCTCCACTGAGGAACCTTGCTTGGCGGCGGAT  
GGCCGGAAGACGGCGGCGGAGGCTTGCGATGTGACGGTGGCCATTTGGG

>TCONS\_00056135

CGAATGTTTGATAATGGTATTATGCCATGGGTCAGAAAGATGCTGCAACAAGTTGTCAAATGGTCCTTTTCC  
TGTCACATTGTGCTGCACTATAAATCCCAAAAATGCCAACATTGCCAATCTCCCTGCCATCAAGATAAGTAGG  
AGAGGTTAAGCCTGGAAGCCATTACCTTTCTTAGCTTCAACTTTAAATGAGTTGTAAGATGAAGTTGATGGT  
TTAAAAAACACCTCCCTATTTAGTTTACCAGATGCTCCACTGAGGAACCTTGCTTGGCGGCGGATGGCCGGA  
AGACGGCGGCGGAGGCTTGCGATGTGACGGTGGCCATTTGGG

>TCONS\_00056181

CCCCCTTCCTAGTCTATTAATAACAAAACGGATTTTCCAATGTATAAAATAAAAATTCCAATGGCTTTGGCT  
ACTCTAACCTTCCCGACCACGATTTTTTCTTTTTTTTTTAGGTATTTCACTGCGAAATAAGAAAGAAATAAA  
AAATTGTATTTTCTAGGTATCAAAAATCTAGTAAATAAAAGAAATCAAAAAATAAATAGTGGGTTCTTCGT  
TTCTATGGTTACTTCTTAAACGGTGAGGTCTTCTCTATACACCGGAGCCTTTACTTTATACTTTAATTTAATATT  
TAATCAACTAATTGATGTTATTGGGAAGTTGTATAGTTCACACTCTTTGGCTCTACCCATGAATTATCCAGTAA  
TAGGTCTTTCACAATCAGATCTACCTATACAGTAACGGTATTTAATTATGAAAGTTTGCTGGGTAGCTAACCTT  
CTTAGTCCGTTCTTGCCAGAGTGGGAG

>TCONS\_00056182

TTCTAGTCTATTAATAACAAAACGGATTTTTCCAATGTATAAAATAAAAAATTCCAATGGCTTTGGCTACTCTA  
ACCTTCCCGACCACGATTTTTCTTTTTTTTTTTAGGTATTTCACTGCGAAATAAGAAAGAAATAAAAAATTG  
TATTTTCCTAGGTATCAAAAATCTAGTAAATAAAAAGAAATCAAAAAATAAATAGTGGGTTTCCTTCGTTTCTAT  
GGTACTTCTTAAACGGTGAGGTCTTCTCTATACACCGGAGCCTTTACTTTATACTTTAATTTAATATTTAATCA  
ACTAATTGATGTTATTGGGAACTTGTATAGTTCACACTCTTTGGCTCTACCCATGAATTATCCAGTAATAGGTC  
TTTCACAATCAGATCTACCTATACAGTAACGGTATTTAATTATGAAAGTTTGCTGGGTAGCTAACCCCTCTTAGT  
CCGTTCTTGCCAGAGTGGGAG

>TCONS\_00056183

TTCTAGTCTATTAATAACAAAACGGATTTTTCCAATGTATAAAATAAAAAATTCCAATGGCTTTGGCTACTCTA  
ACCTTCCCGACCACGATTTTTCTTTTTTTTTTTAGGTATTTCACTGCGAAATAAGAAAGAAATAAAAAATTG  
TATTTTCCTAGGTATCAAAAATCTAGTAAATAAAAAGAAATCAAAAAATAAATAGTGGGTTTCCTTCGTTTCTAT  
GGTACTTCTTAAACGGTGAGGTCTTCTCTATACACCGGAGCCTTTACTTTATACTTTAATTTAATATTTAATCA  
ACTAATTGATGTTATTGGGAACTTGTATAGTTCACACTCTTTGGCTCTACCCATGAATTATCCAGTAATAGGTC  
TTTCACAATCAGATCTACCTATACAGTAACGGTATTTAATTATGAAAGTTTGCTGGGTAGCTAACCCCTCTTAGT  
CCGTTCTTGCCAGAGTGGGAG

>TCONS\_00056184

TTCTAGTCTATTAATAACAAAACGGATTTTTCCAATGTATAAAATAAAAAATTCCAATGGCTTTGGCTACTCTA  
ACCTTCCCGACCACGATTTTTCTTTTTTTTTTTAGGTATTTCACTGCGAAATAAGAAAGAAATAAAAAATTG  
TATTTTCCTAGGTATCAAAAATCTAGTAAATAAAAAGAAATCAAAAAATAAATAGTGGGTTTCCTTCGTTTCTAT  
GGTACTTCTTAAACGGTGAGGTCTTCTCTATACACCGGAGCCTTTACTTTATACTTTAATTTAATATTTAATCA  
ACTAATTGATGTTATTGGGAACTTGTATAGTTCACACTCTTTGGCTCTACCCATGAATTATCCAGTAATAGGTC  
TTTCACAATCAGATCTACCTATACAGTAACGGTATTTAATTATGAAAGTTTGCTGGGTAGCTAACCCCTCTTAGT  
CCGTTCTTGCCAGAGTGGGAG

>TCONS\_00056185

CCTAGTCTATTAATAACAAAACGGATTTTTCCAATGTATAAAATAAAAAATTCCAATGGCTTTGGCTACTCTAA  
CCTTCCCGACCACGATTTTTCTTTTTTTTTTTAGGTATTTCACTGCGAAATAAGAAAGAAATAAAAAATTGT  
ATTTTCCTAGGTATCAAAAATCTAGTAAATAAAAAGAAATCAAAAAATAAATAGTGGGTTTCCTTCGTTTCTATG  
GTTACTTCTTAAACGGTGAGGTCTTCTCTATACACCGGAGCCTTTACTTTATACTTTAATTTAATATTTAATCAA  
CTAATTGATGTTATTGGGAACTTGTATAGTTCACACTCTTTGGCTCTACCCATGAATTATCCAGTAATAGGTCT  
TTCACAATCAGATCTACCTATACAGTAACGGTATTTAATTATGAAAGTTTGCTGGGTAGCTAACCCCTCTTAGTC  
CGTTCTTGCCAGAGTGGGAG

>TCONS\_00056203

GGCAGGCTCCCACTCTGGCAAGAACGGACTAAGAGGGTTAGCTACCCAGCAAACCTTCATAATTAATAACCG  
TTACTGTATAGGTAGATCTGATTGTGAAAGACCTATTACTGGATAATTCATGGGTAGAGCCAAAGAGTGTGAA  
CTATACAAGTTCCCAATAACATCAATTAGTTGATTAAATATTAATTAAGTATAAAGTAAAGGCTCCGGTGT  
ATAGAGAAGACCTACCGTTTAAGAAGTAACCATAGAAACGAAGGAACCCACTATTTATTTTTTGATTTCTTT  
TATTTACTAGATTTTTGATACCTAGGAAAATACAATTTTTTATTTCTTTCTTATTTTCGCAGTGAAATACCTAAAA  
AAAAAAAGAAAAAATCGTGGTCGGGAAGGTTAGAGTAGCCAAAGCCATTGGAATTTTTATTTTATACATTG  
GAAAAATCCGTTTTGTTATTAATAGACTAGGAAGGGGGGAAAGAATAACTGAAAGAAAGGAAATCGATTAG  
TTATTCGTCAAAGTTTCATTTATTCAATGACCAGAATTAA

>TCONS\_00056204

GGCAGGCTCCCACTCTGGCAAGAACGGACTAAGAGGGT TAGCTACCCAGCAAAC TTT CATAATTA AATACCG  
TTACTGTATAGGTAGATCTGATTGTGAAAGACCTATTACTGGATAATTCATGGGTAGAGCCAAAGAGTGTGAA  
CTATACAAGTTCCCAATAACATCAATTAGTTGATTAAATATTAAATTAAAGTATAAAGTAAAGGCTCCGGTGT  
ATAGAGAAGACCTCACCGTTTAAGAAGTAACCATAGAAACGAAGGAACCCACTATTTATTTTTTTGATTTCTTT  
TATTTACTAGATTTTTGATACCTAGGAAAATACAATTTTTTTATTTCTTTCTTATTTTCGCAGTGAAATACCTAAAA  
AAAAAAAAGAAAAAATCGTGGTCGGGAAGGTTAGAGTAGCCAAAGCCATTGGAATTTTTATTTTATACATTG  
GAAAAATCCGTTTTGTTATTAATAGACTAGGAAGGGGGGAAAGAATAACTGAAAGAAAGGAAATCGATTAG  
TTATTCGTCAAAGTTTCATTTATTCAATGACCAGAATTAA

>TCONS\_00056205

GGCAGGCTCCCACTCTGGCAAGAACGGACTAAGAGGGT TAGCTACCCAGCAAAC TTT CATAATTA AATACCG  
TTACTGTATAGGTAGATCTGATTGTGAAAGACCTATTACTGGATAATTCATGGGTAGAGCCAAAGAGTGTGAA  
CTATACAAGTTCCCAATAACATCAATTAGTTGATTAAATATTAAATTAAAGTATAAAGTAAAGGCTCCGGTGT  
ATAGAGAAGACCTCACCGTTTAAGAAGTAACCATAGAAACGAAGGAACCCACTATTTATTTTTTTGATTTCTTT  
TATTTACTAGATTTTTGATACCTAGGAAAATACAATTTTTTTATTTCTTTCTTATTTTCGCAGTGAAATACCTAAAA  
AAAAAAAAGAAAAAATCGTGGTCGGGAAGGTTAGAGTAGCCAAAGCCATTGGAATTTTTATTTTATACATTG  
GAAAAATCCGTTTTGTTATTAATAGACTAGGAAGGGGGGAAAGAATAACTGAAAGAAAGGAAATCGATTAG  
TTATTCGTCAAAGTTTCATTTATTCAATGACCAGAATTAA

>TCONS\_00056206

GGCAGGCTCCCACTCTGGCAAGAACGGACTAAGAGGGT TAGCTACCCAGCAAAC TTT CATAATTA AATACCG  
TTACTGTATAGGTAGATCTGATTGTGAAAGACCTATTACTGGATAATTCATGGGTAGAGCCAAAGAGTGTGAA  
CTATACAAGTTCCCAATAACATCAATTAGTTGATTAAATATTAAATTAAAGTATAAAGTAAAGGCTCCGGTGT  
ATAGAGAAGACCTCACCGTTTAAGAAGTAACCATAGAAACGAAGGAACCCACTATTTATTTTTTTGATTTCTTT  
TATTTACTAGATTTTTGATACCTAGGAAAATACAATTTTTTTATTTCTTTCTTATTTTCGCAGTGAAATACCTAAAA  
AAAAAAAAGAAAAAATCGTGGTCGGGAAGGTTAGAGTAGCCAAAGCCATTGGAATTTTTATTTTATACATTG  
GAAAAATCCGTTTTGTTATTAATAGACTAGGAAGGGGGGAAAGAATAACTGAAAGAAAGGAAATCGATTAG  
TTATTCGTCAAAGTTTCATTTATTCAATGACCAGAATTAA

>TCONS\_00056207

GGCAGGCTCCCACTCTGGCAAGAACGGACTAAGAGGGT TAGCTACCCAGCAAAC TTT CATAATTA AATACCG  
TTACTGTATAGGTAGATCTGATTGTGAAAGACCTATTACTGGATAATTCATGGGTAGAGCCAAAGAGTGTGAA  
CTATACAAGTTCCCAATAACATCAATTAGTTGATTAAATATTAAATTAAAGTATAAAGTAAAGGCTCCGGTGT  
ATAGAGAAGACCTCACCGTTTAAGAAGTAACCATAGAAACGAAGGAACCCACTATTTATTTTTTTGATTTCTTT  
TATTTACTAGATTTTTGATACCTAGGAAAATACAATTTTTTTATTTCTTTCTTATTTTCGCAGTGAAATACCTAAAA  
AAAAAAAAGAAAAAATCGTGGTCGGGAAGGTTAGAGTAGCCAAAGCCATTGGAATTTTTATTTTATACATTG  
GAAAAATCCGTTTTGTTATTAATAGACTAGGAAGGGGGGAAAGAATAACTGAAAGAAAGGAAATCGATTAG  
TTATTCGTCAAAGTTTCATTTATTCAATGACCAGAATTAA

>TCONS\_00056321

CCCTCACTGAGGTGCTCTTCTACTATTTTCTGATTACAAGCAGCATGATCATTAAAAAATCAAGATCATT CAG  
AAACTCACCTATAGCTTCAACCAATCGCAGAACCATTTGTCTGTGTGAATTCCTTTGACACAGCTGCTCCAA  
TAACTTTGTAAGCATCAAAGATGTAGACACAACCATTGAGGAAGCAGAGCAGAGAACCAGACAATGAACC  
TCCGATAGCAAGGAGTGCGAGAAAACGGAAGTCAAATATCGCCCTTTC AATAGTTGATT CAGTGTGCTGAAC  
AAATCTAACAAC TGGGTTTCCATTAGGATTTGCCAAAGCATAGTTGAACCCGTTATCCGGGGTTTTAGAAGA

>TCONS\_00056378

>TCONS 00056486

>TCONS 00056487

>TCONS 00056488

>TCONS 00056489

>TCONS 00056490

[illegible]

[illegible][illegible][illegible][illegible]

AAACCCTAAACCCCTAAACCCCTAAACCCCTAAACCCCTAAACCCCTAAACCCCTAAACCCCTAAACCCCTAA  
AACCCCTAACCCCTAAACCCCTAAACCCCTAAACCCCTAAACCCCTAAACCCCTAAACCCCTAAACGCTAAA  
CCCTAAACCCCTAAACCCCTAAACCCCTAAACCCCTAAACCCCTAAACCCCTAAACCCCTAAACCCCTAAACC  
CTAAACCCCTAAACCCCTAACCCCTAAACCCCTAAACCCCTAAACCCCTAACCCCTAAACCCCTAAACCCCT  
ACACCCTAAACCCCTAAACCCCTAAACCCCTAAACCCCTAAACCCCTAAACCCCTAAACCCCTAAACCCCTAAA

[illegible]

AAAACCCTAAACCCTAAACCCTAACCCCTAACCCTAAACCCTAAACCCTAACCCCTAACCCCTAAACCCTAAACCTAA  
CCCCCTAAACCCTAAACCCTAAACCCTAAACCCTAAACCCTAAACCCTAAACCCTAAACCCTAAACCCTAAAC  
CCCTAAACCCTAAACCCTAAACCCTAAACCCTAAACCCTAAACCCTAAACCCTAAACCCTAAACCCTAAACCCTAAAC  
CTAA

AAACCCTAAACCCTAAACCCTAACCCCTAACCCCTAAACCCTAAACCCTAAACCCTAAACCCTAAACCCTAA  
CCCCTAAACCCTAAACCCTAAACCCTAAACCCTAAACCCTAAACCCTAAACCCTAAACCCTAAACCCTAAAC  
CCTAAACCCTAAACCCTAAACCCTAAACCCTAAACCCTAAACCCTAAACCCTAAACCCTAAACCCTAAACC  
TAA

[illegible]

ACCTAAACCCTAACCCCTAAACCCTAAACCCTAAACCCTCAACCCTAAACCCTAAACCCTAAACCCTAAACCCTAACCC  
CTAAACCCTAAACCCTAAACCCTAAACCCTAAACCCTAAACCCTAAACCCTAAACCCTAAACCCTAAACCCTAAACCCT  
AAACCCTAAACCCTAAACCCTAAACCCTAAACCCTAAACCCTAAACCCTAAACCCTAAACCCTAAACCCTAAACCCTAA

ACCTAAACCCTAACCCCTAAACCCTAAACCCTAAACCCTAAACCCTAAACCCTAAACCCTAAACCCTAACCC  
CTAAACCCTAAACCCTAAACCCTAAACCCTAAACCCTAAACCCTAAACCCTAAACCCTAAACCCTAAACCCT  
AAACCCTAAACCCTAAACCCTAAACCCTAAACCCTAAACCCTAAACCCTAAACCCTAAACCCTAAACCCTAA  
AACCCAAAACCCTAAACCCTAAACCCTAAACCCTAAACCCTAA

[illegible]

ACCTAAACCCTAACCCCTAAACCCTAAACCCTAAACCCTAAACCCTAAACCCTAAACCCTAACCCCTAACCC  
CTAAACCCTAAACCCTAAACCCTAAACCCTAAACCCTAAACCCTAAACCCTAAACGCTAAACCCTAAACCCT  
AAACCCTAAACCCTAAACCCTAAACCCTAAACCCTAAACCCTAAACCCTAAACCCTAAACCCTAAACCCTAA  
ACCCTAACCCCTACACCCTAAACCCTAAACCCTAAACCCTAAACCCTAAACCCTAAACCCTAAACCCTAAAC  
CCTTAAACCCTAAACCCTAAAACCCAAAACCCCAAACCCAAAAACCCAAAAACCCCTAAACCCTAA

>TCONS 00056504

>TCONS 00056511

CCCTCCTAAACCCTAAACCCTAAACCCTAAACCCTAAACCCTAAACCCTAAACCCTAAACCCTAA  
ACCCTAAACCCTAAACCCTAAACCCTAAACCCTAAACCCTAAACCCTAAACCCTAAACCCTAAACCCTAA  
CCTAAACCCTAAACCCTAAACCCTAAACCCTAAACCCTAAACCCTAAACCCTAAACCCTAAACCCTAA

>TCONS\_00056512

CCCTCCTAAACCCTAAACCCTAAACCCTAAACCCTAAACCCTAAACCCTAAACCCTAAACCCTAA  
ACCCTAAACCCTAAACCCTAAACCCTAAACCCTAAACCCTAAACCCTAAACCCTAAACCCTAAACCCTAA  
CATAAACCTAAACCCTAAACCCTAAACCCTAAACCCTAAACCCTAAACCCTAAACCCTAAACCCTAAACC  
TAAACCCTAAACCCTAAACCCTAA

>TCONS\_00056513

CTCCTAAACCCTAAACCCTAAACCCTAAACCCTAAACCCTAAACCCTAAACCCTAAACCCTAAACCCTAA  
CCTAAACCCTAAACCCTAAACCCTAAACCCTAAACCCTAAACCCTAAACCCTAAACCCTAAACCCTAAACC  
TAAACCCTAAACCCTAAACCCTAAACCCTAAACCCTAAACCCTAAACCCTAAACCCTAAACCCTAAACCCTA  
AACCTAAACCCTAAACCCTAAACCCTAAACCCTAAACCCTAAACCCTAAACCCTAAACCCTAAACCCTAA  
AACCTAAAA

>TCONS\_00056514

CAAACCCTAAACCCTAAACCCTAAACCCTAAACCCTAAACCCTAAACCCTAAACCCTAAACCCTAAACCCTA  
AACCTAAACCCTAAACCCTAAACCCTAAACCCTAAACCCTAAACCCTAAACCCTAAACCCTAAACCCTAA  
CCCTAAACCCTAAACCCTAACCCCTAAACCCTAAACCCTAAACCCTAAACCCTAAACCCTAAACCCTAAACC  
CTAAACCCTAAACCCTAAACCCTAAACCCTAAACCCTAAACCCTAAACCCTAAACCCTAAACCCTAA

>TCONS\_00056515

AGCCCCTAAACCCTAAACCCTAAACCCTAAACCCTAAACCCTAAACCCTAAACCCTAAACCCTAAACCCTAA  
ACCCTAAACCCTAACCCCTAAACCCTAAACCCTAAACCCTAAACCCTAAACCCTAAACCCTAAACCCTAAAC  
CCTAAACCCTAAACCCTAAACCCTAAACCCTAAACCCTAAACCCTAAACCCTAAACCCTAAACCCTAAAC

>TCONS\_00056516

CTAAACCCTAAACCCTAAACCCTAAACCCTAAACCCTAAACCCTAAACCCTAAACCCTAAACCCTAAACCCT  
AAACCCTAAACCCTAAACCCTAAACCCTAAACCCTAAACCCTAAACCCTAAACCCTAAACCCTAAACCCTAA  
ACCCTAACCCCTAAACCCTAAACCCTAACCCCTAAACCCTAAACCCTAAACCCTAAACCCTAAACCCTAAACC

>TCONS\_00056517

AAGAAACCCTAAACCCTAAACCCTAAACCCTAAACCCTAAACCCTAAACCCTAAACCCTAAACCCTAAACC  
CTAAACCCTAAACCCTAAACCCTAAACCCTAAACCCTAAACCCTAAACCCTAAACCCTAAACCCTAAACCCT  
AAACCCTAAACCCTAAACCCTAACCCCTAAACCCTAAACCCTAAACCCTAAACCCTAAACCCTAAACCCTAA  
ACCCTAAACCCTAAACCCTAAACCCTAAACCCTAAACCCTAAACCCTAAACCCTAAACCCTAAACCCTAA

>TCONS\_00056530

GGGTTTAGGGTTAGGGTTTAGGGTTTAGGGTTTAGGGTTTAGGGTTTAGGGTTTAGGGTTTAGGGTTAGG  
TTAGGGTTTAGGGTTTAGGGTTTAGGGTTTAGGGTTTAGGGTTTAGGGTTTAGGGTTTAGGGTTTAGGG  
GGTTTAGGGTTTAGGGTTTAGGGTTTAGGGTTTAGGGTTTAGGGTTTAGGGTTTAGGGTTTAGGGTTAGG  
TAGGGTTTAGGGTTAGGGTTTAGGGTTTAGGGTTTAGGGTTTAGGGTTTAGGGTTTAGGGTTTAGGGTT

>TCONS\_00056531

AGGGTTTAGGGTTAGGGTTTAGGGTTTAGGGTTTAGGGTTTAGGGTTTAGGGTTTAGGGTTTAGGGTTAGG  
GTTTAGGGTTTAGGGTTTAGGGTTTAGGGTTTAGGGTTTAGGGTTTAGGGTTTAGGGTTTAGGGTTAGG  
TAGGGTTTAGGGTTAGGGTTTAGGGTTTAGGGTTTAGGGTTTAGGGTTTAGGGTTTAGGGTTTAGGGTTG



AGGGTTTAGGGTTTAGGGTTTAGGGTTTTAGGGTTTAGGGTTTAGGGTTTAGGGTTTAGGGTTTAGGGTTTAGG  
GTTTAAGGGTTTAGGGTTTAGGGTTTAGGGTTTAGGGTTTAGGGTTTAGGGTTTAGGGTTTAGGGTTTAGGGTT  
TAGGGTTTAGGGTTTAGGGTTTAGGGTTTAGGGTTTAGGGTTTAGGGTTTAGGGTTTAGGGTTTAGGGTTAGG  
GTTTAGGGTTTAGGGTTTAGGGTTTAGGGTTTAGGGTTTAGGGTTTAGGGTTTAGGGTTTAGGGTTTAGGGTTT  
TGGGTTTAGGGTTTAGGGTTTAGGGTTTAGGGTTTAGGGTTTAGGGTTTAGGGTTTAGGGTTTAGGGTTTAGGG  
TTTAGGGTTTAGGGTTTAGGGTTTAGGGTTTAGGGTTTAGGGTTTAGGGTTTAGGGTTTAGGGTTTAGGGTTA  
GGGTTTAGGGTTTAGGGTTTAGGGTTTAGGGTTTAGGGTTTAGGGTTTAGGGTTTAGGGTTTAGGGTTTAGGGTTT

TTAGGGTTTAGGGTTTAGGGTTTAGGGTTTAGGGTTTAGGGTTTAGGGTTTAGGGTTAG  
GGTTTAGGGTTTAGGGTTTAGGGTTTAGGGTTTAGGGTTTAGGGTTTAGGGTTTAGGGTTAG  
GGTTTAGGGTTTAGGGTTTAGGGTTAGGGTGTGGGTTTAGGGTAGGGTTAGGGTTAGGGTTAGGGT  
TTAGGGTTTTAGGGTTTAGGGTTTAGGGGGGGGTTAGGTTTAGGGTTAGGGTTAGGGTTTTAGGGTTA  
GGGTTT

>TCONS\_00056537

GTTTAGGGTTTAGGGTTTAGGGTTTAGGGTTTAGGGTTTAGGGTTTAGGGTTTAGGGTT  
TAGGGTTTAGGGTTTAGGGTTTAGGGTTTAGGGTTTAGGGTTTAGGGTTAGGGTTAGGGTTAGG  
GGTTAGGGTTAGGGTTAGGGTTAGGGTTTAGGGTTTTGGGTTTAGGGTTAGGGTTAGGGTTAGGGTT  
AGGGTTAGGGTTAGGGTTAGGGTTAGGGTTAGGGTTAGGGTTAGGGTTAGGGTTAGGGTTAGGG  
TTTAGGGTTAGGGTTAGGGTTAGGGTTAGGGTTAGGGTTTAGGGTTAGGGTTAGGGTTAGGGTTA  
GGGTTTAGGGTTAGGGTTAGGGTTAGGGTTAGGGTTAGGGTTAGGGTTAGGGTTAGGGTTATGGTT  
TAGGGTTAGGGTTAGGGTTAGGGTTAGGGTTAGGGTTAGGGTTAGGGTTGGGGTTAGGGTTAGG  
GTTTAGGGTTAGGGTTAGGGTTAGG

>TCONS\_00056538

GTTTAGGGTTATGGTTAGGGTTAGGGTTAGGGTTAGGGTTAGGGTTAGGGTTAGGGTTAGGGTTT  
GGTTAAGGGTTAGGGTTAGGGTTAGGGTTAGGGTTAGGGTTAGGGTTAGGGTTAGGGTTAGGGT  
TTAGGGTTAGGGTTAGGGTTAGGGTTAGGGTTAGGGTTAGGGTTAGGGTTAGGGTTAGGGTTAG  
GGGTTAGGGTTAGGGTTAGGGTTAGGGTTAGGGTTTTGGGTTAGGGTTAGGGTTAGGGTTAGGGTT  
TAGGGTTAGGGTTAGGGTTAGGGTTAGGGTTAGGGTTAGGGTTAGGGTTAGGGTTAGGGTTAGG  
GTTTAGGGTTAGGGTTAGGGTTAGGGTTAGGGTTAGGGTTTTAGGGTTAGGGTTAGGGTTAGGGTT  
AGGGTTAGGGTTAGGGTTAGGGTTAGGGTTAGGGTTAGGGTTAGGGTTAGGGTTAGGGTTATGGT  
TTAGGGTTAGGGTTAGGGTTAGGGTTAGGGTTAGGGTTAGGGTTAGGGTTGGGGTTAGGGTTAG  
GGTTAGGGTTAGGGTTAGGGTTAGG

>TCONS\_00056539

TTAAGGGTGTAGGGTTAGGGTTAGGGTGTAGGGTTAGGGTTAGGGTTAGGGTTAGGGTTAGGGTTA  
GGGTTAGGGTTAGGGTTAGGGTTAGGGTTAGGGTTAGGGTTAGGGTTAGGGTTAGGGTTAGGGT  
TTAGGGTTAGGGTTAGGGTTAGGGTTAGGGTTAGGGTTAGGGTTAGGGTTAGGGTTAGGGTTAG  
G

>TCONS\_00056901

CTTCCGAAGAAACTTGCTCCAGATTCATTTCCAGTATATTGAATGGCAATCGTACCGTGTGGAAGCACGTGG  
AGAGGTCTACCTCAGTTTCTAACAAAATTATCGGTTACTAGTAAATTTTCAGCATCTCCATTTTGTTCTCAAG  
CAAGACAAGGGCATTGGCGTCACCAAGTCCACACTTTTTGTCAAGAATCGCTGCGTGGACTTTACAGCCCA  
GTGTCGCACAAGAATCAATGCCACCAGAGAGGGGCTCGTTTCATTGTTAGGGCAGATAGAGATTACTATGAT  
GTCCTAGGTGTGTCTAGAAATGCAAGCAAATCAGAGATAAAAAGTGGTAGGGGAACCTTGAGTAGTCTCTGAT  
GCAAAAACATATGAGAACAAATGGGGAGTTTTAACACAAAACACAAACAGTTCAGAGGAGATTGGAGTTGGAT  
GGATCTTTCGCAGTTATGGTAAACATGTCTATAAAAAAATCTATTTTCCACTTAATTTCCATGCTACTTTTA  
ATATGCGAAATTTACAAAGACGGTAAACAAAGATGAAGGATTAGTTGAGAAACAGGATGAAGGCACTGGTT  
TTGATCCCCGGAATAACTGATGGGTGAATCAGAAGTGGATCACAATGATATTGATTGACTAAGGAGTGTAAG  
AAGAAGGACGGACAAGCAGAAGAACCTGCTTTAGTGCCTTGTTGAACTTTCTCTCTGGACATAGTTAAACAT  
TAATGATTCTGTCTTTGTGGAAAAAATTCAGAGAGCTGTTCTCTGTTTGACGAATTTGTAACACGAGAAAA  
CTCAAATCCATGTTTATGTTTTCCCACTGCTTCAATGAGCGCAATTGAACAGGGGTGTTGGCGT

>TCONS\_00056930

ATCTTTGCCCATTTGGTTCATGGCTCGCTAAGTTTTCTTTGGAAGCTTGACCTGGTGGCCGACGAGAACTCCTC  
GCTCTTCTGTTATGGATGGGGTCAGGACCATTTGGAAGCTTCTTCTACTCACGAAGTTGAGATCTATCTTGGA  
ATGAATACTTCTCTTTTGTATTTTCATAAGTTTGGTATTCTTCTTCATAATTCCTTCATTTTCAAATACTCC

>TCONS\_00056933

GGAAAATATTAGAAAGTTCTCTAAGGGCTTTTTGGGATTTTTGATACTGCTAGGATTTGTTTGGTTATTGTTGGT  
TGGAGTATTTGAAAATGAAGGAATTATGAAGAAGAATACCAAAGTTATGAAAATACAAAAGAGAAGTATTC  
ATTCCAAGATAGATCTCAACTTCGTGAGTAGAAGAAGAGTTCCAAATGGTCCTGACCCCATCCATAACAGAA  
GAGCGAGGAGTTCTCGTCGGCCACCAGGTCAAGCTTCCAAAGGAAAAGTTAGCGAGCCATGAACCAATGGG  
CAAAGATTATAAGGCTTGTGATATGCTT

>TCONS\_00057055

CCCCCCCCCCCCCAAAAAAAAAAATCTTGAAATAGAAGTTAAGAATCGGTGAAATCCTATTTTCATTTGGGTG  
TTTGTTTAGCCTCTGAATATAGTATGGATACTCTGATCTTCATTTCCCTCTTCATTCTTATTCTACATGTTAAAGC  
ACAAGCAAATACAAATACAAATAGTTGCTCACCAATTAAGTGTCAAATAACTCTGATATCAACATTCAGTTT  
CCTTTCAGACTGCAGGAATTTCAACCTCAACACTGTGGTCTCTCTGGTTTTGAGCTATACTCCTTGGCGTGTAT  
TATCCTGTTTATTTGTAGTGGTGATGCTGTTAAACATAAAGAAGTTATCTCATTCTACAAAGAGAATGGAG  
GTGGAGAAGGAGAAAGAGAATCAGAAGGAACCTCATGCTGCCATTTTAGGGGACTATGAAGCTTTGAAGCC  
CAAAAGAGAATTCATGGCCAATGCTAACAGATGTTGAATGATCTAATTTAGGAAAAAATTGTTACAAAGAC  
ATTCAGAATCCAAATGCTTTCTAGTTGTTTTAAAATGATTGAGAAACGCTCTTAAATATGATATGAAGCTAGC  
ATTTGGCCATAGATCCCAAATTTGTTTTGAAAAATCTGATTTGGGTGAAGTTTGGTTTGAAGATAAAAATGTGT  
TTGGACATACGTTTTCAATTTCCAACTTTATTTTGAAAAACATGTATATAATTCTCAGTTTTGGAATTTGGCC  
CAAAATCAGCTCAATAGTAGCTGATTTGGGATTTGGCCAAAATATGGGCAAAATTTATGGCCAAACATGAG  
TTTTGAAAAATAAATCCCAAATTTATTTTGCCAAAAATCATCGTCAAATGGGGCCGA

>TCONS\_00057059

TTTACCAGTCTTTGCCAGTCACCTATTGAGTGGCATCTTCAGTAAATCTAGCATCAAAAGGAGCAGAAGGGTT  
GGGGTGTGTAGAAGCAATACTCGCTCCAGAACCATGTTGCAATTCTATCACTAGCCATCTGACGGCTTTACTC  
ATCTGCTCCAACCTAACAGCACTAATGGGTTGAAGGCCACTTGTTGCTGATGATTGCCAGGCTTCCCTGAAA  
CAGAGCCCGTAGCCTCATCTACAAGACACTCGGAACCTATTCTTTGCTTAACTGACTCAACAACTCCTCTGC  
CTGATCACAAGCAACCCTGAACAACCTCCACCGTTGCTTAAAGTTTTCTAACGCAGCGTCAGTTGCTACTGTT  
TTCTGACCATTTGAACTCTCTTTTGATTCAAGTGCA

>TCONS\_00057117

GCTTCATCCAGCACCATGTATTGCCATTTGACACATCTGAAGTATTTCTCATCAGAGACTAGCAGTTGTAACT  
GGTAATGAGAATATGGAATCCAGCATCCCGTCGATATAGACGTTTTGGGTAAATATTCTTCCGAAGTACCATT  
TGCTCTTGTAACCCTCCCCAATATGGAAGAGTTTTTAGATCAGGGCAGAAACGACCAATTTTCAT

>TCONS\_00057176

GACAACAGCGGATGGGGTACCCAGATGCTTCACCCTGATTGATTTTCTCACTGCAAATCCAGTTTCTTGTTGTA  
ACGATCTTCTGCTTCTCGCTTATCCTTATAGATCTTTTCCATCAGTCTTCTTATCCCTAGTGGTACTGTCATCTTG  
AAGATCCTTTAAGATGATCCCCGGCACCACAAAGTTGGCAATCCAGTACATAAAGAGCATTACTGCACTTGT  
CTGTAGCAAACTGACAAGTCTCTCGGTGAATTAGCCGCAGCTATGAAAAAGGAGGAGGAGGAAATAGGTA  
TATCTACAGCCC

>TCONS\_00057222

CTCTCATGATTTCTTTTGAAATGTGTGTAATTGCCATTTGTGTCGGCTTGCAGGAAAGATGTGAGGGCAGTGTT  
CCATGTAGAAGCTGGAAATATCTTTAGCTGCATATAAAGGGCGATTATCTCTGTTTGGAGCTGTGAGCATAGT  
AGTAATTAATCCACCTGTGCTTGTTCCTGCTACTACATCAAAATAGTCTATAATCCTTGCATTTGCTCCATCAA  
GCTCCTGAAGCTTGGATTCAAGAAAGGCAAGAATGGTTCCAGGAATAATGCCTCTGATTCCACCTCCATCAA  
TGCTCAAAACTGTTATAAAATTCTTTCCTTTGGTAGCTG

>TCONS\_00057281

CCGCTGCTCCTGCCTCATGGAGGGCAAGTAAAAAAGAGCCTGGCATTCTGTCAGACAGTCCAAGAGAACGG  
CAGAGGTCAGCAGCTTGCCGACGACGTGAAACCATTGGAAGCAGTTTGAATAAGTCATCCTGGTTGAAGTTG  
GAATTAATACCAAAAGTAGCTAGAAGCTGTAAGAATGCATGAGCCTCCAAGGAATTCCCGTTATTTGCATCA  
ATATCAAGTTCATCTAACTTAGGTTTCCACTCCTCAGCTATTAATTTTGCACGTTCTTTACATTTTCAGGTATT  
ATACTTGGAAGAATCGATTTCCAGCATGGTTAATAAAATGCTAAGGCATTCCATCAGCATAATACAAGTT  
CGTCGAAGGCCCAACAGATTTGCATCTTTTTTAGCATCTGAAATTGACACTTCTGAGGGGTAGAAACCCTTGA  
GTGAGTCCAGAACCAGAGAGCCAGGGTCATCTGCGGCTCTAAAAGCAATTGGAATCTCCTCCCTTACAGCAG  
CTAGGTTCTTGAGGTTGTCTGATATAAATTTATGGAGGCCTTCTGAATCCATGTCTTGGCATAGTTTCACTAGC  
TCTGGATAAGACTTGACTTCCACAATTGCATTCTCAGACTGTTTTCTATTATTCTCTGTATAATTCTCAGTTGCC  
CCAGAAACCATGGGCTTTGCCTCCAGAAAAGATGGGCCACCTCGATCCTCAGCATTAAATAACTACAGGTTCT  
GCAGAATAAGGCTTCCTTTGCTTCTCCAGAGCAACAGCAATAGCAGAGACAGCTGCATCCCTTTTCTCCTGGA  
GCCTCTCAAGTGAAGTTTGCTCCTTAGCAACAACAGCTGCTTGACGCTTCTCTAATAGTTCTTTAGACTGAACT  
ATTTTGTTCAAACTCTTCTCATGTTCTTCCAGTTCAGTGAAACGCCTTTTCAAGGACCTCTGTAGCCCATCA  
AAGTGTCTTCGAGTTGCTTCCATTTAGATTGAGAGTAATAGCACGGTGACTTTCCAACCTCAGCAAATGCTTT  
CTGTAGTTGATGTATCTTAGAGGTCGTAGAGTCCATCAATGTTCCAACCTGATTGTGCGTCTTCCATGGCAGACA  
GTCTGGATTGGTGGTGACAGGTGGAGGAAAATGATAGGTCGGCGGCGAATTTCCGCGAAGAATCAGACCATC  
TTGGAACAAGGTTTCTTTGTGCGGATGCCGCAAAGAGGGAAAAGAGGAAAGTGTGAGTTGGAATGTTGACT  
GCTATTTTATGACAGCTTCTCGACACAAACCACCACACGCGCGCG

>TCONS\_00057335

TCAGAAGCAAGATATACTTGTAAGGAACAACATAATTAATATGAATATGTCAAAGAGATCTGAAAGAAT  
AATGCGTACAAGGATAGCATGAGATAGGATCGCTTTCGCATGGATAGCTCAAGAGGGCTTAGCTCTCTCTTTT  
TCCAGCATTTGCTTCCGATAGCAAAGGTTCAAGTTCTCCTTTCCGATACAGCTTAATAGTATCTGTACAACCAC  
CAATGTGTTTGGCCCCAATGAATACATTGGGAACCGTATGCTGTCCAGTAAGCCTTTCCAGCACTTTCTGCAG  
CTGTGGTCTTGGGGACCCATTTTCATCCAATTCAATAACAAGTGGATCTACACCAAGTTTTTTGAACAAAGCT  
TTCACCTCCATTGAGTACGAACACCAAGTTTTGGAGTAAACAACAACCTGGGTTTTTCAGTAATGGTCTTTTTTAC  
GCTCTCTTCCAACGGGACCCGAATGAACCCGACATCGCCCGAATCTG

>TCONS\_00057561

CTCAAGCAGATTTAGCTAGCAGAGGCTCGTCAGCTACTCCTTTTCTTTTAAAGGTAGGATGTATGACTCCGTT  
GCATGATTGTAGTTTATCAATCCTTGCCATACAATCCTTCATCCTATTTAATGCAACGGGTATAGCGGAAGCA  
CTCTCCAAATTCTTCTTTTAAAGGAGCTGTATTTTCTCAGCTTCTTCCGCTCCTCTCCAGCTAACATGGCAATA  
TTAGTTGGTCTTCCAACATCGGAGCTGCAGGGATCACTAGAGGGCCCAGATTGAATACGGATCCGTTGTCAA  
AACGGGTCCCCAACACGGGTCTTTGAGCCGCAAAAATGGAAGAGATATCAGTTTCAAGCTGAGCAAGAATT  
ATGCCTCGGTACTCCGCTATTCTCTCAGCCTTTTGCTTAACTTCTTCTCCTCCAGTAATTCTGCTTCTTCC

>TCONS\_00057649

CATTCTATACCTTCTTTCTTTCATTCCCCTCTTCTTCTATTCTCTCTTCTCTCTCTAGTTTGTGGCACATTTT  
TATGGGTTTGAGAGAAAATATTGCAGTGCAGAAAGCAACACTGAAATCTCCACAAGGTTTCTTTAAAGCTTTT

GGCGCGTATGAGTGGAGTAAATCCAGCAGCTTCAAGCCAAAGGCTGCAAAAACCTGGAAACTGTAAGCCTAA  
TGGCATCTTTAGCTGATGGAAAGGTTAGGGGCCACCTTAGCCAGGGCTTTGTTTTAGTCATCTGCACCTGCAA  
CTTCTTCATTCTCATTCTCATGATGGGAGTT

>TCONS\_00057682

TTCTGTCTTGGTAGATGGAGATGCAAATGATGTGATTCCCTTCATATTTTGAAGTGTGAGCCCCCACTGCAGGTG  
AAACAACAGTCTCCTCCTCTATGGTGTCTCCTGTCTCCTGTTCTTTTGGCAGTCCACCACCAGCAGCACTCTCA  
ATGCTGGCTACCTCAGTTTTACTAACAATGATTTATCATGAGAAAGATCCTCCGACTGTAGCTGGTCAACAT  
CTTTTTCTGCAGCCATGTTTGCCCCACTCTTACCTGCCAGTGAATTTTGCATGAATCCCCCTTATCGAGTAGA  
GCAGCATTCGTGCAATCGCTTACATGGATTTGAACTAATGTAGGTTTCGACATAACATAGAGATGATGCCTGTG  
ATTACCAGCCTTCATGCGTCTCCAGCTTCCTTTTCATCATTTTCATTCTTGCCATCACTCTCACATTTGTTCATT  
CATAGCCTCAATCTTACCATCTTCACCTTTAGAATTAGTTTCACTCTTTTCAGCACCTTCACCCTTAGAATCACC  
TTCCTCTCCTCAACCAGACAATCACTAACCTGAGCCATTGATCCTGAAGTTGATACAGCCAACTCATCACAA  
GAAGATACAGGTAAATTTGGATGGCTGTCAATTTACTTCTCGAATATCCCTCTTCTTTGGTCTCTGATAGGGG  
AGTTACCAAGGGGACCTCTCTAGTCATAGCATTTTCTTTTCTTGAGATTGTCCACCCCTGCAGAAGAAAGA  
GTAACATGGGATTGCGATGGATCTGTTTGGATAGCATCAGACTGTGGCTGAACTTCATTACACAATATATCTT  
CAAGGAGTTTCCCAACAGAGAGAACTGAAGGCGTCTGAGATGCAGCTGACTGAACTTCCATTATTTGTTGAT  
CCTCACTGAGAACCTCCTTAGTTGGATCAGCTCCACAGCTTATATTAACAGTATCTACCCGTTCTGCAACATG  
ACCACTGGATTGTGATGCGTCGGATTTGATAGCATTGCTATGTAGCTTAACTTCAGAACGCACCATAGCTTGA  
GGGATTGGCCTTGCACTAGGATCTGGAGTCATTTGAGATGCTTCTGACTGGACAATTGCTGTTTGTTCAGCAC  
TTCCTGAGCAGGAGAATCGCCAGAGTTGACCATGTTAATCTGCAGCTCAATAGGAGGACCAGAGCAACTTTG  
AGGTGCAACAGATTGGACCACAGCTGCCTTTCTCTGAGCATCATTGAGAACCCTTTTCAGCAGTAGCAGTATCC  
GGGTTTACATTATCACCCACCTGACCAGGAACCAGAATAGCATGGGATTGAGATGCATCTCTGTTGATAGCAT  
TGTTCTGTGGATCAACTTCACTACGGACCATATCTTTAGGGATTTGTCCACCAGAAAAATCTGGAGTCCTTTGA  
GATAACAACCGACTGGTCTACAACCTACTTGTGAGCTTCATTCTCACGCCTGCTTCTTGAGTGGGCTTCTCTCC  
AACGGATAACCTGGTTCTCTTTTGTGGGGTTCAATTGATCTTGGATCCTGAGCACCTAACCCCTCAGTAACA  
GTTGTGGTGATCAAATCCTGTCTCTTCCCCCTGCGCCGTGGTGGCTCACTTCCAGTTTGAGGCTTGCCTCTCG  
TCCTCTACCTGGCTTAGGTGCAGTGGGAGGAGTGTTATACTGTGAAACCGATGAAATTGCAGGCAATGGTGG  
CACTGGATCGGAAGTATGACCAGTTCCTACACCAGAATCTCCTTGACCAATATTCTTCAAGATAGAAGAATC  
ACATAAAGAATCATCATGACCTGAAATAGCAGAAGAGCAAGAAAATGTCCCCTTATCTGATCCAGAATCT

>TCONS\_00057768

GAGCCGTTCCCCTGCTTCCCAGAAAGATGTTGGCTTTCCAGTCTTTGAAACGGTCTGGAGAACAGCTTCTGG  
TTGAACATTGCCCTTAACCTGTCACTTTTGTCTCCTTCAGATCAATGTCAAAGTTTTCTACACCTTCCATTTCCC  
CAACACCCCTTTTACAGCCCCTACACAGCCTTGGCATGACATGCCAACCTTGAGAACAAACAGTCTGAGACAT  
GATGATGAGAAGAACTTGAGAGGTTTTTGAAGAAAAAATGGTTTGATACAAAAAGTCAAGAGAGAAAAAT  
TTGGACCTTTGAATGGTG

>TCONS\_00057973

ATCCGTTGGACATAGATCCAATTTTTCACTTTTTTGGATTCCCTGGAATTTCTTTTTCTGTTCTGTTGGTATCA  
AAACGCCGGTATGTGCGGATATCTTATCTGTCTCTCCAGGAAAATGGATATCTCCAGAAAAGATTTTAAGTTC  
AATTCGTTTTTTTTTCTCTCCACCCGGACCAACCCACCGACTCGGCTTCTTAGATTAAAGGTGATTTGTGTATC  
TACC

>TCONS\_00057985

CTATAATCCTTAAATATCTCTTTAGTAAAACGAACTTGGAACACGAGGTCATTAGGCTTCAAATCCTTTGGTTT  
TTCCGCCAAAGCAAATGGCTTTCTTTTATATAACGGCATTTCAAACCCAGATTGAGAAGAATATTGTGAATTT  
GGGTTCTTTTTGAGTGTTGAAGTTGATGGTGAAGAGAGAGGAAGGCGGTGGTAGTACGCTTTGCTTTGGAA

>TCONS\_00058069

TATTGCCACAACAAGAACTACAATCCCAAGCGCCGATAGAAGCAGACACATGCAAGAGCAACCACCCTTTG  
TGCGCTTGTTCAAAATTGCAAGCTTTTTCTGCACTCGCTGAAGTCTTGAGTCTGTAACATCAACATGTTTCGTCC  
AGGTTATCAATAAGTCTTGTTTGAAGCCAAGTTCTTCATTAAGTCCAGTGCTATATGTTTGGTGCTCATCAC  
TGTCTCCTCCAACTCTCAAGGCCCTCATCTTGCTCTGATTTGATAGAAAAGCCAACAAATAAGGAAAATAA  
CAGAAAA

>TCONS\_00058078

AAGTTACCCATAGCACACAGGAGATCAAGCAAATGTCTTCAAATTTTCAACTCCAAGCTTCTGCACTTCCACC  
TTGAGTGACTTGAGGTATCTCACAGCTTCATCAAGAACACTGACAGTATTCATCCTGCTGGAACCAGGGACA  
ATTCCCTTTAATGCCTTAACCATCTTCTTAAGTTTCCGGCGTTTTTTCTCACTGCAATTGCTAGTACTGCCAGAG  
GACTTCCTGAAAGAAGTGGTCCTGCTCTTTTTGGATTGACAATCATAGTTAGAGTATGATTCAGGGGAACTGT  
TTCCATAGTTTGCATCGGTGCGTGCAGTGCTCACCTCTTCATCATCATATTCCTCATGTTCTTCCTCTTCAAAGC  
TGAGTAATGCATTTATATCGGCTGAATCTTCCTTCAGATATGAAGAACTTCTGTATTCTCATTATTTGCAACT  
TTTCTCTCCATGCTGTCTTGGAAGTAAGTTGCATTAATAATTCAAATCAGGATATGGAACTTGGAAAGCCATGG  
CAGGGTGGAACATGATCTGGCTTCGATAATCAGTCTGATCAAAGATGATGAAATTCTTTGGACATGCCTCAGA  
GGACTGAAATTCGAAACCATGAACAGGCACAGAAGGGTTGAAACCAGTAGGAAGTGCCATTGTACCGAAGA  
CTGATGGAGAAGGAATATCCAATAGATTACCACCGCCTGCTTGGTCTTCAGGAGAGAAAAAAGGCTTTTGAG  
GGGAAAATTGATAGTTACTCTGCATGAGTACTATGACAAAAGAACCAAGTAACTGGAATAGAAATGCGTTT  
TCCAATTGAAAATAGTTCCAATCAGCATTGAGTCTTAATGAGGTCATTCTGATTTCTAATACTGAAGAA  
AACCAGCCAATCCAGGCTTTTGCTGAATAAGAGCAACAAGAAGCAAGCAAATCCCAAACCTCCCCAAGCTT  
TCATTGACCAGACTACGTTACAGGTTTAAGCAACTGACGGAAATATTCAGCCTGACAACTAGCATCAATT  
GGCAATAAGCAACACTCCCTGCATGCATTTTAATCTCACCAGCTTTCTTGACTGCTCTGTATCTCTTCAAGGTA  
AATGCAATGTACATTCTCACCTCCAAATGGACTTTAGTTTCAAGAAATATCACAGATGGAAAATAGATATCT  
GCAATCCGTCATATCAAACAAGCAAAAATTAGTTAAACATTAAGGAACCTTCGGAAAATAAAAGAACAGCTT  
ATTTTCTCACCATTGAAAGATAATAAGTTCATCGCCAGAACTACACTAGAGGAATACGGATTTTAATTTCCAT  
TTCTCTAATGCCAAACCAACTCAAATTATCTTCCACTATAATTTTTGAGTCGTAGTCAGTTTTCCTATATCTTTT  
ATATTACTGTTCTCTTCAGTAA

>TCONS\_00058079

AAGTTACCCATAGCACACAGGAGATCAAGCAAATGTCTTCAAATTTTCAACTCCAAGCTTCTGCACTTCCACC  
TTGAGTGACTTGAGGTATCTCACAGCTTCATCAAGAACACTGACAGTATTCATCCTGCTGGAACCAGGGACA  
ATTCCCTTTAATGCCTTAACCATCTTCTTAAGTTTCCGGCGTTTTTTCTCACTGCAATTGCTAGTACTGCCAGAG  
GACTTCCTGAAAGAAGTGGTCCTGCTCTTTTTGGATTGACAATCATAGTTAGAGTATGATTCAGGGGAACTGT  
TTCCATAGTTTGCATCGGTGCGTGCAGTGCTCACCTCTTCATCATCATATTCCTCATGTTCTTCCTCTTCAAAGC  
TGAGTAATGCATTTATATCGGCTGAATCTTCCTTCAGATATGAAGAACTTCTGTATTCTCATTATTTGCAACT  
TTTCTCTCCATGCTGTCTTGGAAGTAAGTTGCATTAATAATTCAAATCAGGATATGGAACTTGGAAAGCCATGG  
CAGGGTGGAACATGATCTGGCTTCGATAATCAGTCTGATCAAAGATGATGAAATTCTTTGGACATGCCTCAGA  
GGACTGAAATTCGAAACCATGAACAGGCACAGAAGGGTTGAAACCAGTAGGAAGTGCCATTGTACCGAAGA  
CTGATGGAGAAGGAATATCCAATAGATTACCACCGCCTGCTTGGTCTTCAGGAGAGAAAAAAGGCTTTTGAG  
GGGAAAATTGATAGTTACTCTGCATGAGTACTATGACAAAAGAACCAAGTAACTGGAATAGAAATGCGTTT

TCCAATTGGAAAATAGTTCCAATCAGCATTGCTTAATGAGGTCATTCTGATTCTAATACACTGAAGAA  
 AACCAGCCAATCCAGGCTTTTGCTGAATAAGAGCAACAAGAAGCAAGCAAATCCCAAACCTCCCCAAGCTT  
 TCACTTGACCAGACTACGTTACAGGTTAAGCAACTGACGGAAATATTCAGCCTGACAACTAGCATCAATT  
 GGCAATAAGCAACACTCCCTGCATGCATTTTAATCTCACCAGCTTTCTTGACTGCTCTGTATCTCTTCAAGGTA  
 AATGCAATGTACATTCTCACCTCCAAATGGACAAGTAAAATCGGTTACAGAATCACGCGAAAGAATACCAC  
 CAAGCGCACACACTTCACACAATAACTCAAAGAAGAAAACGCCCACGGCATGTTGTTGAGTCCAGCTCAGT  
 ATATTATAGTCTTCAATCCAAGCCACCAAATGAAGAAAATATCAAAAGATCTTTGAAACCCAAATCTTTACT  
 A

>TCONS\_00058080

GGACTTGCATGAAGAAGTAGATACAGAATTAGGACGTAACAAGATGCTATATCTCACCAAGTAAAATCGGTT  
 ACAGAATCACGCGAAAGAATACCACCAAGCGCACACACTTCACACAATAACTCAAAGAAGAAAACGCCCCA  
 CGGCATGTTGTTGAGTCCAGCTCAGTATATTATAGTCTTCAATCCAAGCCACTGTCACAGTAGCAAGCACAGC  
 CAAATGAAGAAAATATCAAAAGATCTTTGAAACCCAAATCTTTACTA

>TCONS\_00058094

TCCAGAAACTTTTTCTTATTGCAGAGAAAATCTAGTAAAGATTGTTGGGTTTCAAAGATCTTTTGATATTTCTTC  
 ATTTGGCTGTGCTTGCTACTGTGACAGTGGCTTGGATTGAAGACTATAATATACTGAGCTGGACTGAACAACA  
 TGCCGTGGGCGTTTTCTTCTTTGAGTTATTGTGTGAAGTGTGTGCGCTTGGTGGTATTCTTTCGCGTGATTCTGT  
 AACCGATTTTACTTGGTGAGATATAGCATCTTGTTACGTCCTAATTCTGTATCTACTTCTTCATGCAAGTCCTAA  
 GTTTTATTTGTAAATATGTAATTATTTCCGTTGAACTATATCTGCTGAGGATTTACTGAAGAGAACAGTAATAT  
 AAAAGATATAGGAAAATGACTACGACTCAAAAATTATAGTGAAGATAATTTGAGTTGGTTTGGCATTAGA  
 GAAATGGAAATTAATAATCCGTATTCCTCTAGT

>TCONS\_00058113

TTAAACAAAATGGTATGAGTATGCTTTTGTCAAGGTGGTTTCAATCATCCAAGTCCACCATCACTTCAATATC  
 GTTGCCTAGTGTTATTTTCTGCACATAACCGATTCCAGCGCAAGGTATGCATTTACAGATGGTCTCTTTCCCCC  
 TTTTGTATAGTAACTGACCAATCCTGTCCCTTGGCAACTCCGACATTTCCCAGTCCACTCATAGACGACTGCC  
 TTGCAATCCTCAAATACGGGGTCACACCGGAGCCGGCGGTCAATTTCCCTCCGGCGAAACAGGAGAAGTATCA  
 GGGTAAGTCATAGGAAGAGGAAGAGCTTCACTATCATCAGCCAAATAACTCTCTCTGTTACGTGACCAACGC  
 CTTTCCTTTGCATTCACCTTTGTGTTCTTTTAATGTTATTATTCCCAATTCGCTTATT

>TCONS\_00058196

TATAATGAAGTTGACTTGTCTTTCTTTAATAAGGAGAGAAATCCATGGCCTCACACACACATCTACCTTCAA  
 ATGTATTTCCCCAAATGGTTTCCACTTGTTGGATCCATACGGTCAATTGTTAGCCTTCCTCATATACCTCCAAG  
 ACTCATCCCCGATAACCTTTAACCCTTTTCTTTCCCTGGACTCATAGCAATTTTATCCGGTCCATGAACCTTAT  
 AATAGGACAACACCCCATCT

>TCONS\_00058199

CATGCTTGCTTGGGCTCTTTCTTGAAGAATCTGAATTTGAACTAATACAAAGAGAGGAGACGTTGCAATTCCC  
 TCCTAAGCCTCCTGCAAAGAGAACTGGTGGGGAAGTATAGTGACACCTTTTGCTGGAAATAACATGCTGGT  
 CCTTTACAGCTGCGTGTCAAATAACTCAAGCAAGTACTTTGTGAAAGTGCTGCACAATGAACGTCTGATTCTT  
 ATTACAGTAAGTTTTCTGATCACATTCTTTTGAACATGAACCACAGGTTGTTTCACCATATTATTATTCAACAT  
 CATTGCATTTGAGTATCCTTAATAATTTGTTTGACGTGAGGAGTATAAAAATGAAG

>TCONS\_00058200

AGATGGGGTGTTGTCCTATTATAAGGTTTCATGGACCGGATAAAAATTGCTATGAGTCCAGGGAAAGAAAAGGG  
 GTTAAAGGTTATCGGGGATGAGTCTTGGAGGTATATGAGGAAGGCTAACAATTGACCGTATGGATCCAACAA

GTGGAAACCATTGTTGGGAAATACATTGAAGGTAGATGTGTGTGTGAGGCCATGGATTTCTCTCCTTATTAAAGAAAGGACAAGTCAACTTCATTATATGTTATATTTCCCATATAACCTGTAACTTTACCGATT

>TCONS\_00058210

ACTTTTATAGAGTTTGGTATATGGGCTATTGATTTTCCTTTTCCTCTGCTTTCATAGGTTATGCCGTTTCAGCCCTAGGATCCAGTAACTTCAATTCCAAGAGAATAGTATTTTTAGGACATGGAGCAAGTGTGCCTTTTCTCTGATGCTTTGGGTATCGAGCTTTTTCATTTTCAGGAAGTTCTTGATTGGCGGTTTCCTCATCCGTAGAGATTTCTCTCTGTTTCCTTTGTCAATTGCACATAGTGAACAGCTCCTCTTGCTGTTTCAGTACAGGAGGCAATTTGCAATTTCCATATAAGCTAGTGTGTTGGATGTTTAATGCAATTCCTCTAGTAAGCAGCACACCGTATGATGTCAGTTGTGACTGTACTGTAACTACCTCGTGCAAATTTATTTTTACTAGCGCATTTGCCGATACGACACCCATTCAAGACCCTTTGGAAACCATCCTCTGAGGGCTAAATCAGCAGATGCATGAATACATAG

>TCONS\_00058223

CTGATTTAGCCCTCAGAGGATGGTTTCCAAAGGGTCTTGAATGGGTGTCGTATCGGCAATGCGCTAGTAAAAATAAATTTGCACGAGGTAGTTAACAGTACAGTCACAACTGACATCATACGGTGTGCTGCTTACTAGAGGAATGCATTAAACATCCAACACACTAGCTTATATGGAAATTGCAAATTGCCTCCTGTACTGAACAGCCAAGAGGAGCTGTTCACTATGTGCAATTGACAAAGGAAACAAGAAGGAAATCTCTACGGATGAGGAACCGCCAATCAAGAACTTCCTGAAATGAAAAAGCTCGATACCCAAAGCATTTCAGAGAAAAGGCACACTTGCTCCATGTCCTAAAAAATACTATTCTCTTGGAATTGAAGTTTACTGGATCCTAGGGCTGAAACGGCATAACCTATGAAAGCAGAGGAAAGGAAAATCAATAGCCCATATACCAAACCTCTATAAAAAG

>TCONS\_00058233

CTTCCCTTTCAATGCCTTTTCCGATCATCTTTTATGCTGCCGCCGATTATGGAACAGGCCGTTTACCGCCGTCGTTTGGCGGCGTTGGGATTAAATCAAATAGGAATCCTCGATCTAATTTGAACTCAAATTTCCCAATTACAAGCCCTACCTGAGAAGGAAGTCCAGATTTGCCGAGCCGATTTTCAGCTAATTTGAGCTGTATTTCTTCTCCCACTACTGCTTTCACC

>TCONS\_00058310

ACTCATGTCCAAAGGAAATTAGACAAAAAGATGGAAGATAAGAAATGAAGAGAAGCATTTTAGTCCTTGATCTCTCATGGAAGACGAAGACTAACATCTTAATACAGCATGCTCAATTCACATAGGAGGAATATGCCGCTCAAACCTCAACTAAATTCGATTTTCTGGACCATCTATCTGGCTCAATATGAGAACTCACGACCTCGAAGCAAAATATATTTCTTAACTCAGACGGCAATGTCCTAGGCACAAGCCTACGATAATCTATCATATACTCTACAATATTTAAAC

>TCONS\_00058374

GACCAGAACTTGTTCTACATCCAGATTGTTTTCTACATAATATTGGAAGTTGAGAGTGGGGATGTTGGCTTGCTACTAGGCATTCACCAATAATAACTTGAGCCTTAGAACTTATTATGGATCTACTTTCTGTGGAGTAGATCAAGAAATGGATGATGAAGACGATGAAGAAGTACCTTACTTGAAATGAATTTGAATTGTTATAGATGAATGTCTAGGAATCTTTTGTACCAACATTTTGAAGTATTTACTCTCTTGAAATGTACAAAACCTTATGCACTCA

>TCONS\_00058379

TCTGTTATGGTATTGCTGTCGTGCCGTTCCAGTAGTGTGTTGTTAATTTGTAGTTTGTAGTGGGGGAATGAAAAAGGTAAATAAAGACCTTAGCCAAAAGCAAGGGATTCCCGGGGCCCCGAACGAGAGCAGAGGCAGCAGGGCAGGTATTCTCAAAAAAGAAAGAAACGAAAACAGGCAGGGAGGTAAGAGCGAGTAAGACTAGGTTATAGCAAGACAACAGAGGTTAGATAGCTCTTACCGGAGGAAGAGGGTTCAGGTCACCCGTCCCCTTGACCCAGACACGAACTAATCCTTCTCTCTCGAATGTATGCCCCGTTTTTCGTCGAATCTTTTGTATCACCTTCAAAAACAAACCGGAATTCCGTCTTGACATGATAAATAGTGATGCCACCTGCAGAGCGTAGTCCTCCCTGCAGCCTTGAAGTAGACTATTTCTCGAGTCTGATCTTATCCCCAAAGCCTTTTTGCAAAAGGAGTAGGTAGCGAGATAGATGACTAAA



AGCTGATGATCTTTGCCTCTTACTAGTAAAGGGAAAAGCCCTATATATCTTATTAGTCAAGCCTAAAGGCCCT  
 TTTACTAATATAATAGAAGGTAAGACCGGCTTTTCGCGCAGCAGCTGCGCCCTTGCTTCTTGCCCATAGAGAGTT  
 AGGATATTTTGTGAGCTCCTTCGCCTAGCGGAAACCTCCGCTTTTCGGCCGTAATCCCGTGCTTTACCAACGCA  
 TTCAATGGATTCCACCATGAACCGGGAGCGGGCGAAGACATGCAGCTTCCATTTTCGGGGTACACAGTCACG  
 TGCTGAGCAAAGAGGTATATATCACACTCATTCACAAGCGCAAGGTGCGGCATCCGCCTGAACGGGGAGAG  
 GATTTCCCTAAAACAAAGATAGGCGTGTCAGGAAACAATGTGAAGTCACCCCTATTTTCGCTGTCCAGGGAGC  
 TGTTGACTAATGACCTAAAAAATGCGTGACGTTTGGGAAGCATGAGCAACCCTTCGCGCACGAGATAGCAAT  
 GACAGGAGATTGACCGGTGCGGGTTCGAGTGATCTCAGGGGTTTAGGGGTGCTTCTCCTGCTGCGACTACCTCT  
 CTATTTTCAAAAGTATATAGAAATGGTAGGCACTGGGAGTGAGTGAACCTACCCGGGGGAGAAAGGGGCAAC  
 CTCTCTATAGAAGGGAAGGGAAGGGTTATCCGCTCATAATGATTGTAGAGTCTCTCGGGGTGGAGGTCTA  
 ATAGTAGTCACATCAAGTCCTCCCCCTCTTACTCAGAATAGCTAGCGAGAGGAATACTACTGATTATCTATGA  
 AAGAAGGCTTTTAAGAATGAAAAAATCTTATCTTAAGGATAGAGAGCCCCCGCCTGCCTTTTCAGATACG  
 AGTGAGTGAGCGCTTTTTCTGCTATGAATGAATGACCTCTCCATTTATTTTCAAGCTTGCTCTTCAAACCGGCC  
 TATCGCTCTCCTCTATGAAAAGGTTCTTCCGTAATCACTCTCAATAAGACATCCATTCCCCTTTCAAATGAAAA  
 GAGAACTAGACTTTTCTCTTCATCATTGAAATCCGCCATTCAATCGCAG

>TCONS\_00058380

TCTGTTATGGTATTGCTGTCGTGCCGTTCCAGTAGTGTTTGTAAATTTGTAGTTTTGAGTGGGGGAATGAAAA  
 AAGGTAAATAAAGACCTTAGCCAAAAGCAAGGGATTCCCGGGGCCCGAACGAGAGCAGAGGCAGCAGGGC  
 AGGTATTCTCAAAAAAGAAAGAAACGAAAACAGGCAGGGAGGTAAGAGCGAGTAAGACTAGGTTATAGCA  
 AGACAACAGAGGTTAGATAGCTCTTACCGGAGGAAGAGGGTTCAGGTACCCCGTCCCCTTGACCCAGACAC  
 GAACTAATCCTTCTCTCTCTCGAATGTATGCCCGTTTTTCGTCTGAATCTTTTTGATCACCTTCAAAAACAAACC  
 GGAATTCGCTCTTGACATGATAAATAGTGATGCCACCTGCAGAGCGTAGTCCTCCCTGCAGCCTTGAAGTAG  
 ACTATTTCTCGAGTCTGATCTTATCCCCAAAGCCTTTTTGCAAAAGGAGTAGGTAGCGAGATAGATGACTAAA  
 AGCTGATGATCTTTGCCTCTTACTAGTAAAGGGAAAAGCCCTATATATCTTATTAGTCAAGCCTAAAGGCCCT  
 TTTACTAATATAATAGAAGGTAAGACCGGCTTTTCGCGCAGCAGCTGCGCCCTTGCTTCTTGCCCATAGAGAGTT  
 AGGATATTTTGTGAGCTCCTTCGCCTAGCGGAAACCTCCGCTTTTCGGCCGTAATCCCGTGCTTTACCAACGCA  
 TTCAATGGATTCCACCATGAACCGGGAGCGGGCGAAGACATGCAGCTTCCATTTTCGGGGTACACAGTCACG  
 TGCTGAGCAAAGAGGTATATATCACACTCATTCACAAGCGCAAGGTGCGGCATCCGCCTGAACGGGGAGAG  
 GATTTCCCTAAAACAAAGATAGGCGTGTCAGGAAACAATGTGAAGTCACCCCTATTTTCGCTGTCCAGGGAGC  
 TGTTGACTAATGACCTAAAAAATGCGTGACGTTTGGGAAGCATGAGCAACCCTTCGCGCACGAGATAGCAAT  
 GACAGGAGATTGACCGGTGCGGGTTCGAGTGATCTCAGGGGTTTAGGGGTGCTTCTCCTGCTGCGACTACCTCT  
 CTATTTTCAAAAGTATATAGAAATGGTAGGCACTGGGAGTGAGTGAACCTACCCGGGGGAGAAAGGGGCAAC  
 CTCTCTATAGAAGGGAAGGGAAGGGTTATCCGCTCATAATGATTGTAGAGTCTCTCGGGGTGGAGGTCTA  
 ATAGTAGTCACATCAAGTCCTCCCCCTCTTACTCAGAATAGCTAGCGAGAGGAATACTACTGATTATCTATGA  
 AAGAAGGCTTTTAAGAATGAAAAAATCTTATCTTAAGGATAGAGAGCCCCCGCCTGCCTTTTCAGATACG  
 AGTGAGTGAGCGCTTTTTCTGCTATGAATGAATGACCTCTCCATTTATTTTCAAGCTTGCTCTTCAAACCGGCC  
 TATCGCTCTCCTCTATGAAAAGGTTCTTCCGTAATCACTCTCAATAAGACATCCATTCCCCTTTCAAATGAAAA  
 GAGAACTAGACTTTTCTCTTCATCATTGAAATCCGCCATTCAATCGCAG

>TCONS\_00058381

GGGGGAATGAAAAAAGGTAAATAAAGACCTTAGCCAAAAGCAAGGGATTCCCGGGGCCCGAACGAGAGCA  
 GAGGCAGCAGGGCAGGTATTCTCAAAAAAGAAAGAAACGAAAACAGGCAGGGAGGTAAGAGCGAGTAAG  
 ACTAGGTTATAGCAAGACAACAGAGGTTAGATAGCTCTTACCGGAGGAAAAGGGTTCAGGTCACCCGTCCCC

TTGACCCAGACACGAACATAATCCTTCTCTCTCTCGAATGTATGCCCCGGTTTTTGTCTGAATCTTTTTGATCACCTT  
 CAAAAACAAACCGGAATTCCTGCTTGACATGATAAATAGTGATGCCACCTGCAGAGCGTAGTCCTCCCTGC  
 AGCCTTGAAGTAGACTATTTCTCGAGTCTGATCTTATCCCCAAAGCCTTTTTGCAAAAGGAGTAGGTAGCGAG  
 ATAGATGACTAAAAGCTGATGATCTTTGCCTCTTACTAGTAAAGGGGAAAAGCCCTATATATCTTATTAGTCAA  
 GCCTAAAGGCCCTTTACTAATATAATAGAAGGTAAGACCGGCTTTTCGCGCAGCAGCTGCGCCCTTGCTTCTTG  
 CCCATAGAGAGTTAGGATATTTTGTGAGTCTCTTCGCCTAGCGGAAACCTCCGCTTTTCGGCCGTAATCCCGT  
 GCTTTACCAACGCATTCAATGGATTCCACCATGAACCGGGAGCGGGCGAAGACATGCAGCTTCCATTTTCGG  
 GGTACACAGTCACGTGCTGAGCAAAGAGGTATATATCACACTCATTACACAAGCGCAAGGTGCGGCATCCGCC  
 TGAACGGGGAGAGGATTTCCCTAAAACAAAGATAGGCGTGTGAGGAAACAATGTGAAGTCACCCCTATTTTCG  
 CTGTCCAGGGAGCTGTTGACTAATGACCTAAAAAATGCGTGACGTTTGGGAAGCATGAGCAACCCTTCGCGC  
 ACGAGATAGCAATGACAGGAGATTGACCGGTCGGGGTCGAGTGATCTCAGGGGTTTAGGGGTGCTTCTCCTG  
 CTGCGACTACCTCTCTATTTTCAAAGTATATAGAAATGGTAGGCACTGGGAGTGAGTGAACCTACCCGGGGG  
 AGAAAGGGGCAACCTCTCTATAGAAGGGAAGGGAAAGGGTTATCCGCTCATAATGATTGTAGAGTCTCTCGG  
 GGTGGAGGTCTAATAGTAGTCACATCAAGTCCTCCCCCTCTTACTCAGAATAGCTAGCGAGAGGAATACTA  
 CTGATTATCTATGAAAGAAGGCTTTTAAGAATGAAAAAATCTTATCTTAAGGATAGAGAGCCCCCGCCTG  
 CCTTTTCAGATACGAGTGAGTGAGCGCTTTTCTGCTATGAATGAATGACCTCTCCATTTATTTTCAAGCTTGCT  
 CTTCAAACCGGCCTATCGCTCTCCTCTATGAAAAGGTTCTTCCGTAATCACTCTCAATAAGACATCCATTCCCC  
 TTTCAAATGAAAAGAGAACTAGACTTTTCTCTTCATCATTGAAATCCGCCATTCAATCGCAG

>TCONS\_00058387

CGATTGAATGGCGGATTTCAATGATGAAGAGAAAAGTCTAGTTCTCTTTTCATTTGAAAGGGGAATGGATGTC  
 TTATTGAGAGTGATTACGGAAGAACCTTTTCATAGAGGAGAGCGATAGGCCGGTTTGAAGAGCAAGCTTGAA  
 AATAAATGGAGAGGTCATTCATTCATAGCAGAAAAAGCGCTCACTCACTCGTATCTGAAAAGGCAGGCGGG  
 GGGCTCTCTATCCTTAAGATAAGATTTTTTTTCATTCTTAAAAGCCTTCTTTCATAGATAATCAGTAGTATTCCTC  
 TCGTAGCTATTCTGAGTAAGAGGGGGAGGACTTGATGTGACTACTATTAGACCTCCAACCCCGAGAGACTC  
 TACAATCATTATGAGCGGATAACCCTTTCCCTTCCCTTCTATAGAGAGGTTGCCCCCTTCTCCCCCGGGTAGTT  
 CACTCACTCCCAGTGCTACCATTTCTATATACTTTTGAAAATAGAGAGGTAGTCGCAGCAGGAGAAGCACC  
 CCTAAACCCCTGAGATCACTCGACCCCGACCGGTCAATCTCCTGTGCTATTGCTATCTCGTGCGGAAGGGTTGC  
 TCATGCTTCCCAAACGTCACGCATTTTTTAGGTCATTAGTCAACAGCTCCCTGGACAGCGAAATAGGGGTGAC  
 TTCACATTGTTTCTGACACGCCTATCTTTGTTTTAGGGAAATCCTCTCCCCGTTAGGGCGGATGCCGCACCTT  
 GCGCTTGTGAATGAGTGTGATATATACCTCTTTGCTCAGCACGTGACTGTGTACCCCGAAAATGGAAGCTGCA  
 TGTCTTCGCCCCGCTCCCGGTTTCATGGTGGAATCCATTGAATGCGTTGGTAAAGCACGGGATTACGGCCGAAAA  
 GCGGAGGTTTCCGCTAGGCGAAGGAGCTCACAAAATATCCTAACTCTCTATGGGCAAGAAGCAAGGGCGCA  
 GCTGCTGCGCGAAAGCCGGTCTTACCTTCTATTATATTAGTAAAGGGCCTTTAGGCTTGACTAATAAGATATA  
 TAGGGCTTTTCCCTTTACTAGTAAGAGGCAAAGATCATCAGCTTTTAGTCATCTATCTCGCTACCTACTCCTTTT  
 GCAAAAAGGCTTTGGGGATAAGATCAGACTCGAGAAATAGTCTACTTCAAGGCTGCAGGGAGGACTACGCT  
 CTGCAGGTGGGCATCACTATTTATCATGTCAAGACGGAATTCGGGTTTGTGTTTGAAGGTGATCAAAAAGATT  
 CGACGAAAACCGGGCATACATTGAGAGAGAGAAAGGATTAGTTCGTGTCTGGGTCAAGGGGACGGGTGACC  
 TGAACCTCTTCTCCGTAAGAGCTATCTAACCTCTGTTGTCTTGCTATAACCTAGTCTTACTCGCTCTTACCT  
 CCTGCTGTTTTCGTTTTCTTTCTTTTTTGAGAATACCTGCCCTGCTGCCTCTGCTCTCGTTCCGGGCCCCGGGAA  
 TCCCTTGCTTTTGGCTAAGGTCTTTATTTACCTTTTTTCATTCCCCCCTCAAAACTACAAATTAACAAACACTA  
 CTGGAACGGCACGACAGCAATACCATAACAGATAGACTTACCGACAAGAGAGAGCGAGACTGACCTGAAC  
 CCTTTCTCCTCCGTAAGAGCTATCTAACCTCTGTTGTCTTGCTATAACCTAGTCTTACTCGCTCTTACCTCCCTG

CCTGTTTTCGTTTCTTTCTTTTTTGAGAATACCTGCCCTGCTGCCTCTGCTCTCGTTTCGGGCCCCGGGAATCCCTT  
GCTTTTGGCTAAGGTCTTTATTTACCTTTTTTCATTCCCCCACTCAAACTACAAATTAACAAACACTACTG

>TCONS\_00058388

CGCACTGCGATTGAATGGCGGATTTCAATGATGAAGAGAAAAGTCTAGTTCTCTTTTCATTTGAAAGGGGAAT  
GGATGTCTTATTGAGAGTGATTACGGAAGAACCTTTTCATAGAGGAGAGCGATAGGCCGTTTGAAGAGCAA  
GCTTGAAAATAAATGGAGAGGTCATTCATTCATAGCAGAAAAAGCGCTCACTCACTCGTATCTGAAAAGGCA  
GGCGGGGGGCTCTCTATCCTTAAGATAAGATTTTTTTTCATTCTTAAAGCCTTCTTTTCATAGATAATCAGTAGT  
ATTCCTCTCGCTAGCTATTCTGAGTAAGAGGGGGAGGACTTGATGTGACTACTATTAGACCTCCAACCCCGAG  
AGACTCTACAATCATTATGAGCGGATAACCCCTTCCCTTCCCTTCTATAGAGAGGTTGCCCTTTCTCCCCCGG  
GTAGTTCACTCACTCCCAGTGCCTACCATTCTATATACTTTTGAAAATAGAGAGGTAGTCGCAGCAGGAGAA  
GCACCCCTAAACCCCTGAGATCACTCGACCCCGACCGGTCAATCTCCTGTCATTGCTATCTCGTGCGCGAAGG  
GTTGCTCATGCTTCCCAAACGTCACGCATTTTTTAGGTCATTAGTCAACAGCTCCCTGGACAGCGAAATAGGG  
GTGACTTCACATTGTTTCCTGACACGCCTATCTTTGTTTTAGGGAAATCCTCTCCCCGTTAGGCGGATGCCGC  
ACCTTGCGCTTGTGAATGAGTGTGATATATACCTCTTTGCTCAGCACGTGACTGTGTACCCCGAAAATGGAAG  
CTGCATGTCTTCGCCCCGCTCCCGGTTTCATGGTGGAATCCATTGAATGCGTTGGTAAAGCACGGGATTACGGCC  
GAAAAGCGGAGGTTTCCGCTAGGCGAAGGAGCTCACAAAATATCCTAACTCTCTATGGGCAAGAAGCAAGG  
GCGCAGCTGCTGCGCGAAAGCCGGTCTTACCTTCTATTATATTAGTAAAGGGCCTTTAGGCTTGACTAATAAG  
ATATATAGGGCTTTTCCCTTTACTAGTAAGAGGGCAAAGATCATCAGCTTTTAGTCATCTATCTCGCTACCTACT  
CCTTTTGCAAAAAGGCTTTGGGGATAAGATCAGACTCGAGAAATAGTCTACTTCAAGGCTGCAGGGAGGACT  
ACGCTCTGCAGGTGGGCATCACTATTTATCATGTCAAGACGGAATTCCGGTTTGTTTTGAAGGTGATCAAAA  
AGATTCGACGAAAACCGGGCATACTTCGAGAGAGAGAAGGATTAGTTTCGTGTCTGGGTCAAGGGGACGGG  
TGACCTGAACCCCTCTCCTCCGGTAAGAGCTATCTAACCTCTGTTGTCTTGCTATAACCTAGTCTTACTCGCTCT  
TACCTCCCTGCCTGTTTTCGTTTTCTTTCTTTTTTGAGAATACCTGCCCTGCTGCCTCTGCTCTCGTTTCGGGCCCCG  
GGAATCCCTTGCTTTTGGCTAAGGTCTTTATTTACCTTTTTTCATTCCCCCACTCAAACTACAAATTAACAA  
ACACTACTG

>TCONS\_00058389

CGCACTGCGATTGAATGGCGGATTTCAATGATGAAGAGAAAAGTCTAGTTCTCTTTTCATTTGAAAGGGGAAT  
GGATGTCTTATTGAGAGTGATTACGGAAGAACCTTTTCATAGAGGAGAGCGATAGGCCGTTTGAAGAGCAA  
GCTTGAAAATAAATGGAGAGGTCATTCATTCATAGCAGAAAAAGCGCTCACTCACTCGTATCTGAAAAGGCA  
GGCGGGGGGCTCTCTATCCTTAAGATAAGATTTTTTTTCATTCTTAAAGCCTTCTTTTCATAGATAATCAGTAGT  
ATTCCTCTCGCTAGCTATTCTGAGTAAGAGGGGGAGGACTTGATGTGACTACTATTAGACCTCCAACCCCGAG  
AGACTCTACAATCATTATGAGCGGATAACCCCTTCCCTTCCCTTCTATAGAGAGGTTGCCCTTTCTCCCCCGG  
GTAGTTCACTCACTCCCAGTGCCTACCATTCTATATACTTTTGAAAATAGAGAGGTAGTCGCAGCAGGAGAA  
GCACCCCTAAACCCCTGAGATCACTCGACCCCGACCGGTCAATCTCCTGTCATTGCTATCTCGTGCGCGAAGG  
GTTGCTCATGCTTCCCAAACGTCACGCATTTTTTAGGTCATTAGTCAACAGCTCCCTGGACAGCGAAATAGGG  
GTGACTTCACATTGTTTCCTGACACGCCTATCTTTGTTTTAGGGAAATCCTCTCCCCGTTAGGCGGATGCCGC  
ACCTTGCGCTTGTGAATGAGTGTGATATATACCTCTTTGCTCAGCACGTGACTGTGTACCCCGAAAATGGAAG  
CTGCATGTCTTCGCCCCGCTCCCGGTTTCATGGTGGAATCCATTGAATGCGTTGGTAAAGCACGGGATTACGGCC  
GAAAAGCGGAGGTTTCCGCTAGGCGAAGGAGCTCACAAAATATCCTAACTCTCTATGGGCAAGAAGCAAGG  
GCGCAGCTGCTGCGCGAAAGCCGGTCTTACCTTCTATTATATTAGTAAAGGGCCTTTAGGCTTGACTAATAAG  
ATATATAGGGCTTTTCCCTTTACTAGTAAGAGGGCAAAGATCATCAGCTTTTAGTCATCTATCTCGCTACCTACT  
CCTTTTGCAAAAAGGCTTTGGGGATAAGATCAGACTCGAGAAATAGTCTACTTCAAGGCTGCAGGGAGGACT

ACGCTCTGCAGGTGGGCATCACTATTTATCATGTCAAGACGGAATTCCGGTTTGTTTTGAAGGTGATCAAAA  
AGATTCGACGAAAACCGGGCATACTTCGAGAGAGAGAAGGATTAGTTCGTGTCTGGGTCAAGGGGACGGG  
TGACCTGAACCTCTTCCTCCGGTAAGAGCTATCTAACCTCTGTTGTCTTGCTATAACCTAGTCTTACTCGCTCT  
TACCTCCCTGCCTGTTTTCGTTTTCTTTCTTTTTTGAGAATACCTGCCCTGCTGCCTCTGCTCTCGTTCGGGCCCCG  
GGAATCCCTTGCTTTTGGCTAAGGTCTTTATTTACCTTTTTTCATTCCCCCACTCAAACTACAAATTAACAA  
ACACTACTG

>TCONS\_00058390

CGCACTGCGATTGAATGGCGGATTTCAATGATGAAGAGAAAAGTCTAGTTCTCTTTTCATTTGAAAGGGGAAT  
GGATGTCTTATTGAGAGTGATTACGGAAGAACCTTTTCATAGAGGAGAGCGATAGGCCGGTTTGAAGAGCAA  
GCTTGAAAATAAATGGAGAGGTCATTCATTCATAGCAGAAAAAGCGCTCACTCACTCGTATCTGAAAAGGCA  
GGCGGGGGGCTCTCTATCCTTAAGATAAGATTTTTTTCATTCTTAAAAGCCTTCTTTCATAGATAATCAGTAGT  
ATTCCTCTCGCTAGCTATTCTGAGTAAGAGGGGGAGGACTTGATGTGACTACTATTAGACCTCCAACCCCGAG  
AGACTCTACAATCATTATGAGCGGATAACCTTTCCCTTCCCTTCTATAGAGAGGTTGCCCCTTTCTCCCCCGG  
GTAGTTCACTCACTCCCAGTGCCTACCATTCTATATACTTTTGAAAATAGAGAGGTAGTCGCAGCAGGAGAA  
GCACCCCTAAACCCCTGAGATCACTCGACCCCGACCGGTCAATCTCCTGTCAATTGCTATCTCGTGCGCGAAGG  
GTTGCTCATGCTTCCCAAACGTCACGCATTTTTTAGGTCATTAGTCAACAGCTCCCTGGACAGCGAAATAGGG  
GTGACTTCACATTGTTTCTGACACGCCTATCTTTGTTTTAGGGAAATCCTCTCCCCGTTACGGCGGATGCCGC  
ACCTTGCGCTTGTAATGAGTGTGATATATACCTCTTTGCTCAGCACGTGACTGTGTACCCCGAAAATGGAAG  
CTGCATGTCTTCGCCCCGCTCCCGGTTTCATGGTGGAATCCATTGAATGCGTTGGTAAAGCACGGGATTACGGCC  
GAAAAGCGGAGGTTTCCGCTAGGCGAAGGAGCTACAAAATATCCTAACTCTCTATGGGCAAGAAGCAAGG  
GCGCAGCTGCTGCGCGAAAGCCGGTCTTACCTTCTATTATATTAGTAAAGGGCCTTTAGGCTTGACTAATAAG  
ATATATAGGGCTTTTCCCTTTACTAGTAAGAGGCCAAAGATCATCAGCTTTTAGTCATCTATCTCGCTACCTACT  
CCTTTTGCAAAAAGGCTTTGGGGATAAGATCAGACTCGAGAAATAGTCTACTTCAAGGCTGCAGGGAGGACT  
ACGCTCTGCAGGTGGGCATCACTATTTATCATGTCAAGACGGAATTCCGGTTTGTTTTGAAGGTGATCAAAA  
AGATTCGACAAAAACCGGGCATACTTCGAGAGAGAGAAGGATTAGTTCGTGTCTGGGTCAAGGGGACGGG  
TGACCTGAACCTTTTCCTCCGGTAAGAGCTATCTAACCTCTGTTGTCTTGCTATAACCTAGTCTTACTCGCTCT  
TACCTCCCTGCCTGTTTTCGTTTTCTTTCTTTTTTGAGAATACCTGCCCTGCTGCCTCTGCTCTCGTTCGGGCCCCG  
GGAATCCCTTGCTTTTGGCTAAGGTCTTTATTTACCTTTTTTCATTCCCCCACTCAAACTACAAATTAACAA  
ACACTACTG

>TCONS\_00058391

CTCCCCCCCCAAAAAAGAGAGACTTCATTTCTTCCACCTTCCCTGTATGAGTAGTGAAGAAGTATAGAGC  
ACTTTAGTTGGTTGTTGACCAACGGAAAGCATGGAAGAAAAAAGGAAGAATTTACGCAATTTCTTTTCTAA  
GAAAGAGATCATAGTGATTGATGGCTCTTCAATCCGCCGAAATGGAACGCTTTGGCGTGTACCAAAATGGA  
GAATTTGGGTCAGATTTATAAGCTTACGACCACTGAACAACTTGGTTGACGAACATAGTTTATGCGCCGCTA  
ATGTAGCGGCTTGTCGAGCATTTGACAACTCACACCATCCATTTCAAATAGGATTTGTCCCCTGGACACACG  
AGCAATCCAA

>TCONS\_00058485

ACCTATCTACCGCTGGATTGAAGTTTGCAGCATAGCAGAGTTGTGGAGTTAGTATGCAGATTGGTTAAAACAG  
GGCAAAATGGCAAAATGCTCAAACACTTGAGAAAAGAGGCATCATATAGATCCCTGGAGTAAGGTTAAGAA  
ATATGGATACCTTGTTGCTAAAAACACCCGATCGTACTTGTAGCGATGTGCTGGATACACCCAAGAATTGCA  
GATGAAATGAACTTCACCATGTCCAGGAATATCTTCTAAAGCGACGGTCTTCAGTTTCTTTGCATCTCTTTGCT  
CAGCTTTAGGAGAGTGTAATTAACCAGGATCAGCATGGACAGCACTAATGAGCTGTAGGATGACGCGTTTGC

CAAAGAGCTCGTGCATTTCGATCAAGGAAGGCAGAACCAGCATCCTTGAAGTTCAGAACATTTTTCTTCCTCA  
GTACAACTGTCCCCTTGATCTTAATAGGACTGGTTTGTTTGCTAGAATCGCTTTCTCTTGGAACATCATGCTGCT  
TCCCGCAAACCATTTCCAGCATTTTCTCCAGTACCTCTGTACAACATGGTGGAAGATCCCCATTGAACAAAA  
TGGAGATACAGAACAAGTCCTAAAGATATGTTTTTGAGTTGAAATA

>TCONS\_00058487

GTTCAACTTGTGTGATTTTCAGATTCAGCGATCCATTTATGTCATGTGACTTCAGATTGAGATGCTATTGGGAAT  
TCCCTTTCCAGTAAGTCCAGTAGTACTCTTGTACCAGACGCGTTTGGGTAGAGTAACGTATAAGGCATCTGT  
ATAGGTCCTTTTCGGTCTTCAATGTATTGTCATTGTTCCCTATCCATTATTCTGTTCTCGATTTCTACCAGTTTGT  
CACGGAATCCCTCAAATGCATGTCGTGGTTGACTGTCAGAAGTCCATTTCAGGAGTATCTCTTTGTCCAAGATA  
AATCTCATCTGAAGAATGCATGGATAACATCTCTATCAAAGAGATGCCAAGAAGAGTTTGGAACTGGGCTGT  
GATGGTCTTTAGGTAGGCTCGCTCATGGTTTGACTCAAGCTCAACATACTCAGGAGTGCCTGGCATTGGCATA  
AAGCGCCGGCTAACGGTTGGGCGATTTGGGAGATAGCCAGCATAAGGATACTGCCCAAATTAAGTGTCTGCA  
TGAAGAGCAGAAGCCACCCATATGATTATGGTGCATGTTTGGACAAGCTCAGCTCTTGTCTGCATCTGAGGCC  
ACCATGGTTCATCTTTCAAGTCACCATGACCCACGTTGCGAACTTCTGTCCACCATGATTGAAGTTCAGAATC  
ACCTTGGATCATGTTCATCCGCTAAGTAATAGAATAAGCAATACTCGTCCACCCAGGTTTCAATTGCTGACCAA  
ATCTCAAGTCCATCAACGGCGTAAGGATAATCCTCTATCAGAAGTCTAAGACCATGAGGCTGGCTTGGATCT  
GTGGCCTACCTCTTAAGTAGATCTGCAGGGAGTGCCTGCTCAGTGAAAACCCAATTCTTATAGATGGAAGAA  
GACATTTCCATGGCATATTTGGATGGAAATACTGTCAACTCAAGTACTCCACCTGCATTAATGAGGATCTGAC  
GAGCCAAAGCATTGATGTTT

>TCONS\_00058527

TCATTGAGAAAAGTGAAGTGAATTTTCATGGTTGTAAAATTACAGAGGAGCTTTTCATGGTTATGTCTGCCTTCA  
TATGTAGTAATCAAATAGCTTGAATCATGTCCATCTCTTTCTATCCTCTTCTTTACCTTGCACCCTCCACTTGAG  
CATTTGTAGTAATTCCTTAGATTTGTGTTACTTTTCACCTTCTTCTTCCCATACTTCTCCATTTATATCCATCAT  
ACAAGATCTCAAGTTG

>TCONS\_00058587

TCCACCGGTAATGTGTGGAAGAGGGTAAGATTTCTATGTGGATAGGACGTATCAACACCTTTTGCATCTTTTC  
ATTTTAAAGGAAATATAGTTGAATAATATAGTGTGGTCTGAGGACCAGGATGGCCGAAGATCAAAACCT  
AAATGTGCCAGGGGTTGATCATCGAAGCCTGGGCAATAACGATTAAGGAATTTGAGCGCTGATGTAGCTAAG  
AGCCACCTTCATAGTCAATTCATTAGGGTTGTCACCTTCTACCCGGAAAAGTATCCACCGTTTTCTTTATCTGT  
TAAGCCTCACAGCTATGGGACTTCCTAAAGAAAAGTGAATCGCAGTTTATCAACCACTCACAAGACCACCG  
AGATCTTCGACTTAGCTCCCAAAGGTAATCCACCCGGCCCTTTCCCAACCTATAACAAGGAGAGCGGAAGATA  
ACGAAAGGGAGACAAGGTCCTAACTAAATAGAACACAACTCCCATTCCATCTATCATATCAGTCGAGTCGA  
TCCGATTCTGTTCTTATCTATAGATAACGCAAGAGAGAACTTATGACCTCGCGGATGGAGAGGGATTTCGAACC  
CCCGGTATTTCTATAAATACTTCGGTTTTCAAGACCGACTCTTTCAACCGCTCAGACATCCATCCCCTTCGCGC  
TTCGCCCCGCCCTATCCATCCGCGCGCTGGCAGGTAGGGGCTTATCTATGTGATTCTGCTACGCTTGCCTGCGCCT  
ATCGGCTGATTCTATTGCCTGCCGGTTAGCGAACTTTTCCGGTAGTACGAATCGCTACGCTTGCCTCTTTCT  
ATATGATAATATGCATCTTGGTTGCTGCGCTCCCTGCGGGTAATAGCAAGAGAGTGAATAACGAATGATCCTC  
CAAATAAAAGAGTGATTGAGTCCGACTCAAGCGAGTGAGTGGAAGGCGTGGCAAGAGAGCGAGTTCGACT  
CGCGAACGATCAGCAAGTGAAGGACCGATCCTTTTGCGCAAATACTGTTGCGAGATTGGTACTTGGCAGCT

>TCONS\_00058588

TCCACCGGTAATGTGTGGAAGAGGGTAAGATTTCTATGTGGATAGGACGTATCAACACCTTTTGCATCTTTTC  
ATTTTAAAGGAAATATAGTTGAATAATATAGTGTGGTCTGAGGACCAGGATGGCCGAAGATCAAAACCT

AAATGTGCCAGGGGTTGATCATCGAAGCCTGGGCAATAACGATTAAGGAATTTGAGCGCTGATGTAGCTAAG  
 AGCCACCTTCATAGTCAATTCATTAGGGTTGTCACCTTCTACCCGGAAGATCCACCGTTTTCTTTATCTGT  
 TAAGCCTCACAGCTATGGGACTTCCTAAAGAAAAGTGAATCGCAGTTTATCAACCACTCACAAGACCACCG  
 AGATCTTCGACTTAGCTCCCAAAGGTAATCCACCCGGCCCTTTCCCAACCTATACAAGGAGAGCGGAAGATA  
 ACGAAAGGGAGACAAGGTCCTAACTAAATAGAACACAACTCCCATTCCATCTATCATATCAGTCGAGTCGA  
 TCCGATTTCGTTCTTATCTATAGATAACGCAAGAGAGAACTTATGACCTCGCGGATGGAGAGGGATTGCAACC  
 CCCGGTATTTCTATAAAATACTTCGGTTTTCAAGACCGACTCTTTCAACCGCTCAGACATCCATCCCCTTCGCGC  
 TTCGCCCCGCCCTATCCATCCGCGCGCTGGCAGGTAGGGGCTTATCTATGTGATTGCTACGCTTGCTGCGCCT  
 ATCGGCTGATTCTATTGCTGCCGGTAGCGAACTTTCCGGTAGTACGAATCGCTACGCTTCGCTCTTTCT  
 ATATGATAATATGCATCTTGTTGCTGCGCTCCCTGCGGTAATAGCAAGAGAGTGAATAACGAATGATCCTC  
 CAACTAAAAGAGTGATTGAGTCCGACTCAAGCGAGTGAGTGGAAGGCGTGGCAAGAGAGCGAGTTCGACT  
 CGCGAACGATCAGCAAGTGAAGGACCGATCCTTTTGCGCAAATACTGTTGCGAGATTGGTACTTGGCAGCT  
 >TCONS\_00058591

AAGTACCAATCTCGCAACAGTATTTGCGCAAAAGGATCGGTCCTTCACTTGCTGATCGTTCGCGAGTCGAACT  
 CGCTCTCTTGCCACGCCTTCCACTCACTCGCTTGAGTCGGACTCAATCACTCTTTAGTTTGGAGGATCATTCG  
 TTATTCATCTCTTGCTATTACCCGCAGGGAGCGCAGCAACCAAGATGCATATTATCATATAGAAAGAGGCG  
 AAGCGTAGCGATTGCTACTACCGGAAAAGTTTCGCTAACCGGCAGGCAATAGAATCAGCCGATAGGCGCAG  
 GCAAGCGTAGCGAATCACATAGATAAGCCCCTACCTGCCAGCGCGCGGATGGATAGGGCGGGCGAAGCGCG  
 AAGGGGATGGATGTCTGAGCGGTTGAAAGAGTCGGTCTTGAAAACCGAAGTATTTATAGAAATACCGGGGGT  
 TCGAATCCCTCTCCATCCGCGAGGTCATAAGTTCTCTCTTGCGTTATCTATAGATAAGAACGAATCGGATCGA  
 CTCGACTGATATGATAGATGGAATGGGAGTTTGTGTTCTATTTAGTTAGGACCTTGCTCTCCCTTCGTTATCTTC  
 CGCTCTCCTTGATAGGTTGGGAAAGGGCCGGTGGATTACCTTTGGGAGCTAAGTCGAAGATCTCGGTGGTC  
 TTGTGAGTGTTGATAAACTGCGATTGCAGTTTTCTTTAGGAAGTCCCATAGCTGTGAGGCTTAACAGATAAA  
 GAAAACGGTGGATACTTTTCCGGGTAGAAGGTGACAACCCTAATGAATTGACTATGAAGGTGGCTCTTAGCT  
 ACATCAGCGCTCAAATTCCTTAATCGTTATTGCCAGGCTTCGATGATCAACCCCTGGCACATTTAGGTTTTGA  
 TCTTCGGCCATCCTGGTCTCAGGACCCAACACTATATTATCAACTATATTTCTTTAAAATGAAAAGATGCA  
 AAAGGTGTTGATACGTCCTATCCACATAGAAATCTTACCCTCTTCCACACATTACCGGTGGATGCTACAGCCG  
 CTATCACTTTGGCTGCAGGATGGGAATGAAGGTCGAGGAGGCAGGGAAGAAAAGGTTATTCGCTATTGGCTT  
 ACCCTTATATCAGGC

>TCONS\_00058592

AAGTACCAATCTCGCAACAGTATTTGCGCAAAAGGATCGGTCCTTCACTTGCTGATCGTTCGCGAGTCGAACT  
 CGCTCTCTTGCCACGCCTTCCACTCACTCGCTTGAGTCGGACTCAATCACTCTTTAGTTTGGAGGATCATTCG  
 TTATTCATCTCTTGCTATTACCCGCAGGGAGCGCAGCAACCAAGATGCATATTATCATATAGAAAGAGGCG  
 AAGCGTAGCGATTGCTACTACCGGAAAAGTTTCGCTAACCGGCAGGCAATAGAATCAGCCGATAGGCGCAG  
 GCAAGCGTAGCGAATCACATAGATAAGCCCCTACCTGCCAGCGCGCGGATGGATAGGGCGGGCGAAGCGCG  
 AAGGGGATGGATGTCTGAGCGGTTGAAAGAGTCGGTCTTGAAAACCGAAGTATTTATAGAAATACCGGGGGT  
 TCGAATCCCTCTCCATCCGCGAGGTCATAAGTTCTCTCTTGCGTTATCTATAGATAAGAACGAATCGGATCGA  
 CTCGACTGATATGATAGATGGAATGGGAGTTTGTGTTCTATTTAGTTAGGACCTTGCTCTCCCTTCGTTATCTTC  
 CGCTCTCCTTGATAGGTTGGGAAAGGGCCGGTGGATTACCTTTGGGAGCTAAGTCGAAGATCTCGGTGGTC  
 TTGTGAGTGTTGATAAACTGCGATTGCAGTTTTCTTTAGGAAGTCCCATAGCTGTGAGGCTTAACAGATAAA  
 GAAAACGGTGGATACTTTTCCGGGTAGAAGGTGACAACCCTAATGAATTGACTATGAAGGTGGCTCTTAGCT  
 ACATCAGCGCTCAAATTCCTTAATCGTTATTGCCAGGCTTCGATGATCAACCCCTGGCACATTTAGGTTTTGA

TCTTCGGCCATCCTGGTCCTCAGGACCCAACACTATATTATTCAACTATATTTTCCTTTAAAATGAAAAGATGCA  
AAAGGTGTTGATACGTCCTATCCACATAGAAATCTTACCCTCTTCCACACATTACCGGTGGATGCTACAGCCG  
CTATCACTTTGGCTGCAGGATGGGAATGAAGGTCGAGGAGGCAGGGAAGAAAAGGTTATTCGCTATTGGCTT  
ACCCTTATATCAGGC

>TCONS\_00058676

ACACTTGGTGTAAGCCCATCTACTCCAACCTCCATGAGCAGGTTCTCATTATACCAGTGACTGTAGGCTGCAG  
CGAATTGGCAACTGAACCAGTCAAGATGAAGCTCTCCAGGCCAACTTGAACACTACCGTCATCTGAATGATA  
CAAAGCAAGGAATTTGTCTTCTCTATTTTGACCAAAATAGTTGTCCCCTTAATATTACTGTACAAGCAGGCAA

>TCONS\_00058682

TGCTTTTCTGTTTCGGGGTAGCTCTGTCGTTTTACCTTTTCATTTTTCCTGTAATGACATGTCTTATTTCTTATAGA  
ATGCCATGGCATGTTCTTTTTCTTTCTTTCTTAAAATCCATCAACATTCAAACACCATCATATAAAATGAAATG  
AAGGAGAAGTTTTTCCGAACCTGATGCATGATTATCTTGACCTTATCTTTTTGGTACATATTTCTCACTCCCGGT  
TGCACTTGTTTGTTATTTTCACTTTAGGCTCTTAAAATACCTTGAAACGCCTCCAATTAGGCGTAGCTCGAGT  
GACAAAGCTCAGACCTCAAGGACTTCATGGTCCTGGGTTTGATTCTTCTGAGGGGGGTTCTTTAAGAAATT  
TAAAACTTACTCTTCTCTTATCTACTAATCTCTTCAACTGGAGTTTGGTTCTGATTCTTTTATTTCCAACCTCT  
GTTGCATTTCTTCATAACAGTGGGTAATTGTGTCTCCTGGAAAGGAGAAAAAAGGGTGCTCAGGCCCAACCA  
TCCTTATTTGTAGCTGTGGCTGCGCTTCATTGCGTCTTCTGTAAGCCTGCATCCATGCCAGTACTTTGCTAATGT  
CCCATTGTTGTCCCAACATGAAAAAGACCCTTGTCTTTTGCAGGTAAATGCTGAGCTGCTTGCCTGCTTGTACA  
GTAATATTAAGGGGACAACTATTTTGGTCAAAATAGAGAAGACAAATTCCTTGCTTTGTATCATTCAAGATGAC  
GGTAGTGTTCAGTTGGCTGGAGAGCTTCATCTTGACTGGTTCAAGTTGCCAATTCGCTGCAGCCTACAGTCA  
CTGGTATAATGAGAACCTGCTCATGGAAGTTGGAGTAGATGGGCTTACACCAAGTGTAGTGGCTGGATTTAA  
GAATTCTATTCTTATTCCTCT

>TCONS\_00058700

TGACTCTCAATACTACGAGGATAGGAGGCTCGGGTATGTTTCCCGAGCTGACATGACTCACACTCTAATGTGG  
ATAAACTAGACAAACTAGGCACCATCTTCTGAAGCTTGGATAAGCTTGGATGTCTTAAACGTCTGTGAATTAG  
GTCCGGAGGATCTGTAAGTACATGCCTTGGAGGAGTTTAGTGAGTTAAGGTAGTAAAGGCCTTCTGATTCA  
AGTCTGTTCGAATCGTCTGCCCCGTAAGTGCCTGCTGATAATAAAGGAATCATCAATAAAATATATACCAC  
AATGGAGGGCACGAGTCAAACGACTAACAGATGCAAGATTAAAAGGACAGCCAGGGACATAGAGAACGGA  
ATCTAGAGTGACAGAGGGTAGGGGATTGCTTGTCC

>TCONS\_00058733

GGATGAGACCACAAACAGTAACAAGAGCCATGACCAATGAGTGATCAACATGAGGTTCCACAACCAATGTT  
AATACATCACTTCCAAATAGTACTCCTGAAGTTGCTTGTGTTTTGTTTTACCTCTGCAACAAGTCTGCCTGCTTGG  
GTCACAATCTTAATGATGTTGTGCCAAGGATAATGTTATAGCAATTTGCTTCAGCTTGATTACAT

>TCONS\_00058945

GATACAAAGGATCTACATTCAATTAGCTGACTCTTTCACCTTCTTAAACAATAGCTAGAACTGCTCCAACCACA  
GCTACTACAGCCCCTGAAATCAAAAGGGTTGACTTGAGATCCTGTGCTCCTCTTCTTCTCCTCCTTGACTTC  
CTTCGGCGTTTCAACCTCTTTGGTCGCTGTGTCAACACCGGCGGCCGCTAAAGC

>TCONS\_00059039

AAAAAATCTAGAAATGCTGATGCTCATCCTGGACATGTGACAACACAATTTGGTATCACCCTTTCACGAT  
TTTAGAACATTTTGCCGATGCCGTCTTGTCTTGGGATAGATTCATTGATATCCATCTTACGCCATTTTCCCATTA  
ATGAGGCCATTTTCATCAGCTTTGTATATAATCCAGTAGGCCACCTGTATGTATGAAGAGAATCTTTCTTCCC  
TCCCCTTTGTTGGATTCTCGTTCATGTCTTTTATCATTCCATAAGCTGCTTTACCACTGTAGACAGGGTCGAGA

ATAACACCTGTGGCTTCAGCAACTTGCTTCACAAATTTAAGCTCGTCAGCTGTGCTCATAGCATACCCAAGGC  
 CTTTCGCATTTTGAATGCTAACAAATATCACGTGAGCTAACGCCTGCATTATTTCCATCAAGTAGGCCTTGAAC  
 ATATTCATAAAAATAATCTGGATCGTCACAAACACAAAATGCATTAACCTTTTGCTTTTAAGCCACTGAGCCTG  
 GATGCAATTGACAAACCAGCGACCGTACCCCCACTGCCACAAGCTACAACAATGTCATCGAATTTCCATTCA  
 CTGCTCGAGTGCTGAAGTTGTTGCTCAACTTCCCGGATTGCTTCAATATAGCCCCAGGTTCTTAAAGAATTGG  
 ATCCACCAACAGGGATGACATACGGCTTTCTTCCTTCATTTAACAGCTTTTCTTCAATAATTTGGTAAGAGCC  
 TCACTGCCAACTTTTGCATATTCCTCTTTTGAGACAAGATCGATGTGCGCTCCAATAATCGCTCAACAAGGA  
 GATTCCCTATCAATCCAGGATCTTTATCCACAAGTAACCTTTGAAGTGCGTAAGATGAGATAACAGTCAAGGTT  
 TAAGTACTTGGCAGCGACAGCAGTAGCACGACAGTGATTACTTTGTATGCCACCTATAGTCACTATGCAGTCA  
 GCCCCCTGTGCCACAGCATCTCCCAACAAGAACTCCAGCTTCTGACCTTGTTTCCACTCAACTGCATTCTTG  
 ATATATCATCACGCTTTAACCAAACCTCAGTGTCTTGGGCAAATTAGGCAGGTTCCACTTGTGAATTGGCGT  
 CGGAAAATGTCCAAGGGAAAAAGTGTGAGAAGGAAGGGGACTAAGATGAGAGGCCCATGAGGAGGCTCG  
 TAAGACTTCTTTGTGAGAAATTGAAAGGGCGATGGCGAAACCTGGAACTGGAATCCTCCATAGATGATTTG  
 GTAAGACAATAATTTCTGTTCAAATTTAACGCCTTATTATTGAATTGTTGCAAAGAAAATGGTGAAGTGTAGC  
 ATACTCTACTGAAGCTACTCCATTGGCAACTCAACATTTT

>TCONS\_00059151

CAAAGTTGGCTTCGGTCATTATTTATTGAACAGAAGCAAAAGCCTCAGTAACGGTCGGACGATAGTAAAAAT  
 TCATAGCAAACCCAGTAGCTACTTGTACTAAAAACAAGTAAGCGTAATTCCCCCTAAACAATAAAATATAT  
 TGACGTGGGGAGGAACGTATTTACTAGTTATATCATCCGCAATTGCTTGAATCTCGAGACGTTCTTCGAACCA  
 ATCATATACTTTACTCATACTTCGGAAATACAGAAACAAAGAAATTCACGATCGAACTACCAAAAGAAAAT  
 AGAATGGACTAGAAATCGGAGCTCTAAATGATTCATTTTGGACTCAAAGCAAGAACTTTGCGGTTCTTATAG  
 ATCTAATTCATTGAAATTCATCCAATAAAACGGAAGAATTATAAATCTCCAAAATAATAGATAGAAATACC  
 GCAAATAAGGCCATTGCGACACCCATCAAAGGAGTAGTTCCCCACCCAGGAGCTACTTTGCCATATTCCGAA  
 TTCAATGGTTTTTAATAAATCTCCTACCGCAGTTCGTCTTGACCAGATCTAGAAGTGTTC AACAGTTTGTGT  
 AGCCATAAATCCTATTGTATTCAATTGAGATCTGTTGACTTTGTATACCATTCCGTTGTAAATAAACGATCCTAT  
 CATAGATA

>TCONS\_00059169

GCTCTTCTGTGGAAGTTGCCTTTGGTTTGATATCGGCATAAGAGGGTAAAAGATGGTTTCACGTATATTCTGA  
 AATAGCTAAGTCTTGTGTTGACACAGAAGAAAGTTGGTACCTGGTCAGTATAACACAAAGTTTGCAAGGATTTT  
 CTGATGCAGTTCAGTGGCTCACATCAACTTACATTTTCTCAGCAGTTTCTTGTTACTCAAGAACAGATATCTT  
 TTTGGCATTTTAAACACTTTATGCAACACATCTGTCTTTTTCTGGTTGATTCAACTCT

>TCONS\_00059184

GGTAATCATCGCATTATGCTCATTTTAATTGGGGGAAAAAATGAAACACAGAGAAATTACATTCAGTACATA  
 GTGCTCTGTATGAATAGAGAGCATTGACGAACAAGCTTAGACAGAATTTGATTGTCATGTTAACTGTTATCTA  
 GTCAAATACTGAATATCATGGTACAAATATATGTTCTTTAAGAGCAGCAGCAGAATCTAGAGCATAGACAA  
 AGATACCTTAGAGCTACTGCGCTCTGGCAACTGGCTCCAATGCTTCAATAGTCACCACGCTATTACCGCGAAT  
 TACCACCATGCCAATTTCAATCTTCTCATTGCCATTAACCTTCAACGGTGTTGTCAATGACCAAATTCATGAAGT  
 GATCAAACCCACGAAGAGTGCCGACAATAAGCGGTTGGCATTGAGCTTGATTGAAGTTGCTTGTCCATATA  
 CTTTTTGAGATCCGGAGGTTGACCCGACCTGCTCATCCTTTCAACCCTTGCTTCTACTCTTCGCTCACTGCTTG  
 AGGAGATGGAGAATGCAAGAATTTTGAGAGTTTTTCAGAGTCCCGGTAGAATTGTTTTTCAACTCTCAATCCC

>TCONS\_00059442



TTCTCGTACTGCACCTATTTCAAAACAACAGCTGCATTTCTGAGAGCCAAATACCTCTGAACATAGTCATTAG  
GAAGCGATCTTATTATCTTAAAAACCTCGGTGTTAGCATAACGGAGTTTAGTTCTTGGGTCAAAATATGGTGCA  
CTCGAATCCTGTTACGTCGCATATCTTTTTGCATGGATGCATAGAAGGTGGTGATTCAATGTTAACATAAGTA  
GGTAGGTGAGGAGGATAATTATCGTAATTTTCAGCTTGAATGATCTGCTTGAGATGCTTCCAATGACGGCCTC  
TGGCCTGTCCTTTAGGGTACTTGTCGTACATCTGAATCTTCTTGAATTTTCATGTGAGTTGGGAGTACTAGCTCTG  
CTTCTATCACTTCCCGCTCCATCTATAGC

>TCONS\_00059443

TCTCGTACTGCACCTATTTCAAAACAACAGCTGCATTTCTGAGAGCCAAATACCTCTGAACATAGTCATTAGG  
AAGCGATCTTATTATCTTAAAAACCTCGGTGTTAGCATAACGGAGTTTAGTTCTTGGGTCAAAATATGGTGCA  
AGTAGGTAGGTGAGGAGGATAATTATCGTAATTTTCAGCTTGAATGATCTGCTTGAGATGCTTCCAATGACGG  
CCTCTGGCCTGTCCTTTAGGGTACTTGTCGTACATCTGAATCTTCTTGAATTTTCATGTGAGTTGGGAGTACTAG  
CTCTGCTTCTATCACTTCCCGCTCCATCTATAGC

>TCONS\_00059497

CGGTCAAAGAAAATCCTCCTGAACTGGAAGTCTGAGAATTCCAGCCATCTTCACTACACAGACAATCCCTGC  
CGCACACGTCCGAAGATCCTGCTGTTGAACTGCAGGAACAAAATATGCCATCATCTTCCAGCCGCCGCTTAA  
CCTTCTTGGTGAGGTATATATTACGCTTTATATAGGTAAAGGGTGTGGGTGCCATTTATTCAACCAATCTGGA  
AGTTCAAAGTCAACAGGATCTCCAATTTGCTTGTCAATTTGTTGAATACATGCCCAATCCCACCATGGACAG  
CAC

>TCONS\_00059609

TGAAGTCAACGTCAATACCTGGGTGAGTGTGAGAACCTGAGCTTTGACTATCATAGATACTACTAGCGAAAC  
CACCAAAGCCTCGCCGGCGCAGGATAGCAAGTTCTGACTAATTACAGCGACGTTGACTGAACCACCGTTAGT  
CTCCATCGGTAAGGTTTCGCCACAAATACACCAACCACCACCAGAGAAATAGATCTGAGCTTGGATAAAGCA  
GATCGGAGAGTTTTAGAAGCTAAAAGATGAAAAAAATCAGATTAGAAGCAGCGTTGATTTCTGACCGTTCTGA  
TCAAGCAGAGAATCAATAGAGACCAAGAGATTGTGATAGAAAGAGAGAGGACTCTTCGTTCTGGAGCGTTT  
GGGTGAAGGGGAGGGGGTTACTGAGGAAGCTGCCCGTAATCTCTCTACAAGGGTTTCGGGCAGTTAGGGCAGT  
GCTTTTCTCTGAAAATATCAAGGCGGTTGAGC

>TCONS\_00059612

TAACCAAACAAGATATCTCCAGGTAAGATTTGCCATATCACTTGCTTTCAGCATCATATAGATCTGTAACTAA  
ATAAGTGCCATGGGCAAATGCACCCGCCAAAACACCATAGAACAAACGATCCCTAAGAACTGGCTTGTGCC  
TCAGAGCTATCCTAATCAGGGGAAGGACAGGTGCATAAACAAGTGAACCAAATACTCAAACGCGGGTCTT  
TTTCTCCTCCTTATAACTTGCGGCTCAGCAGAATCAGACGGCGAAGCCATGGAGGGCAGAAATTTTGAGAGA  
TACAAAA

>TCONS\_00059629

AACTCAGCTTCCCAAAGAGGAAGTTCAGCAGAAGTTGTGATTATGAGAAACGGCAAACCAATATCCTTCGGC  
AAGGATAATAGAAATAAGACCACCTTCAAAATCCGCTCCTGGTCATCAATGACGACAGCACTCTGACCCTTC  
TGCCAATATTTACGAAGAATGTTGATATAAGTAAGATGATTATGGACCTGAGGCGCGCTTCCAAATAGAGGT  
CTCGGCAGTTCTT

>TCONS\_00059639

ATTTTTTTCAATATTCCTGCAGAAAAGAAAAGCCGACTTTCAAGAACTGCCGAGACCTCTATTTGGAAGCGCG  
CCTCAGGTCCATAATCATCTTACTTATATCAACATTCTTCGTAAATATTGGCAGAAGGGTCAGAGTGCTGTCGT  
CATTGATGACCAGGAGCGGATTTGAAGGTGGTCTTATTTCTATTATCCTTGCCGAAGGATATTGGTTTGCCGT

TTCTCATAATCACAACCTTCTGCTGAACTTCCTCTTTGGGAAGCTGAGTTCTTACATTGGGCTTGCTAACATTGTT  
GTGTACAAAGGTAATAAAGATATACGAGCCATTATAAGAACACTCGAGTTTCACAACAAACAAGGTGC

>TCONS\_00059641

AATTCCTCAACTCATCTTCAGGTCCTTTACCAGTTAGCCACCTTTCAAAAACACCATTTTGCATAAGATAGCC  
AATTCTCCTCATAGTAATTTCCCTTTGTTGTTCTTTAGATTGGTTATAATCAGGTTGAACAAATACTTTACCACC  
TCTTAATTTTGGGTTAAAAAGATTACTTTGCAACATTAGACCAAATAGCCAGTCTCTTTCTTGCAAATTATGAC  
CATCCATAAGTTTTCTCATTTCTTTTGTGTCAAAAACAGAAGATGGTTCTGAAAATTGAGGTGGGTTGTAGCTC  
AGACATGGGAAAGATTGGAGTATTGAATTAATGGGTGTTGGGTTTTCTGGTTTAAGTGTCTG

>TCONS\_00059680

TATTAGCACATCAGAAAGAGCAGTAGGTCCAGGAGGAATATGGATGATGCGACTGCTATCGTTGTTGTTTACT  
GCAGCAACTAATGCCTCAAGCTTCTCAGTCTTCCCCTCATCTTCTTCACCAAACTAATAACATCAAGAGCTA  
CACTATTCTTCTCAACTTTCTTCCAATCATCTCCAAGACCTTCTTGTCTGCCAGCAAAAACAATGATCCTCT  
GCTGTTGCTTTTTGTTTTGCCGATGCTTCAGAGCCAACTGTGCCACCTGGATTCCAGCAGCCAAATTCAATTCA  
CCACCGATATCTAATCCTGGGTTTTGGAACCACAAAATAAACTAACTGCGTCAGTTTGAGCTTCAAATCGATT  
GCGCGGATAATCTCCATTGCGCATCC

>TCONS\_00059740

CTCAAGATCAAATGTTCAACTACTCCCAACTCTAAAACTTTCTTGCAAGCTTAATAGAACGAAAATATCATG  
AGTGCAAACCTTTGAATACCCACCCTTTGAACTTGAAAATGTCTTAGCATCTTCTTGGGATAGCAAAGGTCTT  
CATCTCGCACGGGAAGGGATCCTCAGAATATATGCACAATGTCATATGCGAATGTCCAGAAGAGCACGAATG  
ACTG

>TCONS\_00059748

TTAATTTTCCCCCTTGTTGCTTTGGTTCCTCAATGCCGTCCTGGGATTTGAGATCTGTTTTCTTTTTCAAGAAT  
TTCGGAGGCTTTTCGCAGTCTAAGAACGGATCAAGTCAAAAGCCAGAAGCTTCTGCTGGATTTTCTCAACTAT  
TTCTGCCGCTGATAGCACCCAAGAAACACCAGGTATATATTTCTTACATTTGACGTACTAAGCTTAAAGGAGC  
TATGTTAAGGGGTGGATGGAAATGAGTAGCTGGCACGAGTTATTCCATCCGTAACATATTGGATACAAGAC  
TATAAGATGAAGGAAGGATATGGGATGAGTTGGTCTGATTTTTGTGAACACTTGGGCAAGATATTTGCAAA  
CGCAGAAGACTAGACAATGCTGTGACCTATCATGAGTCATGTACAGCTACTTGTAATCTGACAAAAAGAACT  
TTGGCTAATTTTTCCAAGATGCACTTGGAAGTATACAAGTACCATAGTTTTATCGGAAGCATGTTATGTTCAAA  
CTTCCATCTGTCTTTTAGGCCACAACCTATTTTAGATTGATCATGAG

>TCONS\_00059755

TGACACTGACTTAACGTTTCTGATCTTTGCAGTCATTTCGTGCTCTTCTGGACATTTCGCATATGACATTGTGCAT  
ATATTCTGAGGATCCCTTCCCGTGCGAGATGAAGACCTTTGCTATCCCAAGAAGATGCTAAGACATTTTCAAG  
TTCAAAGTGGTGGGTATTCAAAGTTGCACTCATGATATTTTCGTTCTATTAAGCTTGCAAGAAAGTTTTAGA  
GTTGGGAGTAGTTGAACATTTGATCTTGAGAAAACTTTTGGTTAGGTAATTTATATTCAGAGTTTAAAAGCTC

>TCONS\_00059801

ATAAGATATTTTCAGTAACTTGTTTTCTCTACTTTGTAGCTGCAACATTCATTCATGGATGATATGGCCTAGAT  
TGATATGAGTAGACCCTTACAGAACATACAAATAAGAGTAGAAAATAAACTGGAAGTAAAAAAGAGAAAA  
AAGGATCCTTTAAATGCCTCTGAAAAATGCAACCTTTGAGAAGAGTTTGATGTGGTTCTTTAGTTTCTGTCAAC  
TCTTTTGTGCTAACATCTGAGAACTTATAGTGCGAAATGATAATAAGCTTTAGCATCATATTTGTTTCATTATA  
ATTTTATTTACTTATATTTATATATTCTTTGTAGAGACGATGCGAGATAAATAAGGTCAATCGAACTAAGCTGA  
AATCTAATCATTTTCATGGGGTCAAGAGCTTTTGTAGCTGCTCGTGCTGAAATACGAAGATTGAGCTCCACCAG  
ATTATCAACTTTGGGTATATGAAGCTAACTATTGGATCAAGACTAATTGCAAGTGAAGTGTCACTGCATTCCT

CCACTTCTTAGTCTATATTTCTCAGTTAGACTTTTTATGTTGGACATATTCACTTTAATTATGTTTCTTTTAATTTA  
AGGAGCTTTTATTTCAATATAGTTTTAATATTAGTTTTATGATCAATGGTGAATATTTTTGTTACCTTTGATTGTT  
TTTGTTTTCTGTTATTAC

>TCONS\_00059848

TAGCTCTCCTGCATCTGAGGCTAATTTTGGATCTTATTCCGGTTTGCATGCAGAAAGACCAGCTTTTGACAATA  
AATCCAATGAATACTTGCAGTGGGTTCCAAAACCTTTGCGACCTCATCACTTTAATCTCCAGAAGAGACTTT  
GAGTCTCCTAAATCTTTCATATCAAACCTGGGTTCTTAATCTTCTCTTAAGCTCATTTATTGAAGCTAAGTCATTA  
CTAGAGATAGCAATGTCATCCACATAAAGCAGAAGAAGGACA

>TCONS\_00059908

CACGGCTTTTTGCTTCTTCCTGAACTTTATCAATCACCTCGTCAGGAACTCTAAGATACTTTATGGTATTGCCA  
CGAATATAACATTCTGGCATTCTCCAAAATCTATCTCCATCCTTTGATGTACAGATGACTTCACGAAGATGGA  
TGTCATCCAAGTATCACAATTCACCAAATGTCCGTTATAAGTCTCTCCATTTTTTAGCTCCACCAACATGGGA  
TGCCCCTGTGCAGTCTTGAGCAACGAGAGCGGAAGCATCTTTAGATGCGTGAAAATCCGAATTCAAAATTGC  
CTTGTTAATCTTCGTCTTTCTCTTCAACTTTCTGGAATAACGAAAACGTAGGGTT

>TCONS\_00059941

AACAACCTCCAGAATGTAAAAGGAAGTAGGTTACTCATATAAATAATCTGATCAATCCAAAAAAATGTAAAG  
TAAAAAGGAACTACCAGTGAATGAGTCATCATTTGCTGATTCAAATCTTACCTGTGCCACAATACTTAGACGC  
TGATCAGCAAATCTTGTACATACCCTGGGAAGATTCTGAAGGCAATTCATTGGAAAATAAATGGAAAAAGCAG  
AGAGAGGAATGTGAATCTGAGTGTAATATA

>TCONS\_00060152

CTCCGCCTTCCTTCTTCGCCGGAACAATTTCAACTTCCTTTTTCAGGTGCTTCTTCAGCGTCTCGGCCAAATCCT  
TCACGTCCATTGATCCTGTCACAGTCACCAAATCCTTCTGTTTGTCTATTTTCATCTCCTTGTACCCTTTGAATTT  
AGTGACAATTTTGTAGATCTTCTGAATACATCCTTGACAATGGAGATGCACCTTCAGCACAGCCGTGGTAATC  
GGAGGCTCTTTCTCTTTGCTTTTTCTTGTTGTCTTCTCCTCCTTTGTTTTCTTTGGATCCTTGTTTTCTTGTTT  
TGCTTCTTCTTTTCTTCGGCTGCGCCGCCGCCGCCGCCATCTTTTCCCTTGCCGTCTTCTTTGGTACCGGCGAA  
ACCAGTTCAACATGCTTGTGTGTTTTCTGCTCCACTTTTTCTCTCAGCATCACCGGATCAACTTTTCCGATTACC  
GTAACTTGTTTGAATCAGCATCGCACTGAACCTTCTCCACACCTTCGAACTTCGAATTGCTTTGACAACTTT  
GGAGACACAGCC

>TCONS\_00060344

AATATTCAAGTTAAAATAAGTCGTATCTTGCTCAGACCAATAAATAGAGCTGAGGTTCTAGTTAAAGCCGCTAA  
TAGAAAAGCGAAATAACTAGTTATAGTAAGCATGAAAGGGCTAAATTAATGAAAGATGTTCTTTTTATACA  
TATGTTTAGAAAGCACTTACCTAAGTTTCCATTTTTGCAAAATAGGAGGATAGGCAAAAATCTCAATTTCAAT  
TGAAAGAAGAAGTTGAATGAAAAGTTTTTGATTCATCTATCATTATAGGCAGACAGCACTAACAAAGATAAA  
GTGACAGACATATAAAAGAAATTGATTCATCATC

>TCONS\_00060369

GTAAATTGTCCGCCACAACTTCCTTCAAGAGACTACTAAAAGATGTAGTGTCAAACCTGTCCATTATTATCT  
GGTGGCATACCATTAATGGTTCATCACAAGCAGCCTTCAAAAGACTAGTAAAAGAAGTATGTTCAAATTTGT  
TCATTGTCAAGTGATATCATTAAATGGTTCACCACAACAAGGCGTCTCCTTATATGGTAGGCTACTAGAAG  
CTAATGATGGATAGTGGAGGATATCTCCAGGCTTGATACCTCCTGTTTTCCAACATTACTTAGAGCTTCATA  
ATCAACACCAGCTTGTGACTTTGTGCAATCTTTATCCATAATAAGATGTTCAAGACCAGTGAGCTTCTTGAAC  
CTCTTAACATCGTCTGGGTCAATATAACTGGTATCAGGGTCATTGATGAATACAATGTTTGCAATAACATTAT  
ACACATGACAACATAAATGGGGATGCAGGCTGGGAGGAAATAGATCACAAAACCGAGGATAAGCTGCAGC

TTGGCCGTGGTATAGTGTAGGAAGCTTTCCGTGAAAGAACTGGTGCAACCATGGTTGTGCCAGGACAACAGACCGATCTGCCTTTCTTAATGCATGATAGTAAACCCTTTCTACTTCTATGGTTCTTAGGCATGAACCAGCTAGTTCATTGGAAGTGTACGGAGGTAAGCCCAGATATTTTCTTTGTAGAACAGATTTTTTGCGATATTCTCCCTGGAGATCTGGTCCAAAGTAGGCTCCAGTGATGAAGTAAAGGAGGAAAAACTGATCATCCGTGGGAACCAATCCACAGAAGTTCTTGTCCATGCTTGATCAAAACAGTAAGAAGTATGTGAATCAATGAGTTCTCCAGTTGAGCTGCTATTT

>TCONS\_00060440

TCATCGCTAAGCGGAAGTTTGGAGCCATACCTATTAATAATTATGTTTCTGTCTTCTTTTCTACAACCTGTTGTCAATGCATCTTCGATAGCTTGGGCAAAAGTTGCAATCTTGTAAGTGAAGAATCCAACTAACATGGGTATCAAGTCAAGGTGCATGAACCCGTAATCCGCCTCAAGAATACCATTCCACCGGTTATAGATCATAACCAAAACAACAGGAACCAATAGCCTCGGTTGCCAGCTGCTCCCCTGCAAGTAAAGCTTTCTCGTCAGTTAATTAATCAGAGCTCAA

>TCONS\_00060449

CTTAAAGTGCTGAACCATCTACTGTATACATGGTCTGATAAAGTATACCTAGCTAACCCAAAATTATGAACATATTTCCAAGTATAACATGAAAAAAGTTACATTACTTGATCCTATTCTCTTCAAATGAAGCAAATATGTAAGAAAGATCAAGCATCAAACAATCATCTACCTATTAGTACACTGATTGTGACATTGTTTGAGGATGGCAAATCCTGATTCCCACGCCACATATCTTCATCAACAGATCTTCTTATTGAGGTATAAGTGGGTTGCCTAGGCAAGGGCAATCTCATATTGTCAGTTTCCAACATCAAACTACAGAAGACATGTTTGGCCTGTGAACAGCCAAGTCCTGAACACAAAGCATTGCCAAGTGTATACATCTCAACGCTTCATCATGCTGACATCCATCCCATATTGAACGATCTACTAGGTCCATTGGTCTACCTTCGTCCCCTTCTCCCATGCATATCCAATAATGCCTGAATGCTCATCCGACCGAAAGCTTGATTTTCTACGCCACATATAATCTCAAGCAATAGTATGCCGAAGCTGTAGACATCAGACTTGCCAGAGAACAGACCTTCCATTGCATACTCAGGAGCCATATATCCATATGTGCCTACAACCTCTGTTTGTATTTGCTTCATTTTGTTTCCTCCAAATATTCTGGCCATGCCAAAGTCTGAAATTTTTGGGTTTCATCTCTTCATCCAACAAAATGTTACTAGCCTTTAGATCCCTATGGATTATCCTAAGTCTTGAATCTCTATGGAGATATAGTAGCCCTCGGGCAATCCCTTCGATAATGCTGAAGCGTTTTCTCCAGTCTAACTGGGATTTCTAGCAGGGTCAAATAAAAAATGTATCTAAGCTTTTGTGGGCATGTACTCATAAAGCAGAATTTTTTCTTCTCCTTCTATGCAGCAACCCAAAAGCCTAACAAGATTTCTGTGTTGTAATTTTGCTATTAGAGTGATCTCATTCTTGAACCTCCTCATCCCCCTGTCCAGACTTTTGTGAAGCCTCTTTACAGCAACTTCTTGACCACAAGGTAACCTTCCCTTGTAACGGGGCCAAAACCCCCTTGCCCAAGCTTGTGTTGCAAGACAAAAGTCGTCAGTAGCTGTGGCCACCATGCTGAAGCTGAAAAATGCTAATTCTGAACCATTTCCCTTGATGCCCTTCAGCATTGAGGTGCGCCGGTCCATATAAGTCAGCGGAGAACTCTCCACTCCTAAC AAGATGGTTTTTGGGAATTCATTCATCCTCTTGATTCTGAGAATTGGAAGTCAAAGTTATAAGTA

>TCONS\_00060458

ATTCACCTTCACACACTTGGCCCCCTTAAACTCCTCCATTTCACTCAACTTATTAGCAGCAACTGAAGCTCCAAATAAAATTGGGTATCCGATGATGAACGGGCCTTGGGAATTGGGCTATATTTGGCCTTCCATTAAGTCCCAAATCCGTTTTCGGATAAACCATTTCGAAGCTTTCCGGGTCTTCTTGGTCTTGGGTCTCTTTTCTGAGGTTTCAGCCATGGCTTTACGCGCCTCGGCGTCGAGTCTGTGACGCTCCGCCTCGCATGCTGCGTCGTCAAAAACCTGCGTCGTTCTCTTTTGGGAATCC

>TCONS\_00060613

GGCTATATAAGATGTGAATCAAGGAGATTCACGCGTTGATTCACCCTGTATTAAGTCAAAGGAGAACTGGTTTGGTAGTGCAATTCAGTGAAGTACATTATTCTACAAATGCAAGAATCTGATTCATCGTCATCTGAGTCACTGACATCACTTGGCTGAAATTCCAAAACCTCAGCAAGTTTATTTCCATTTGTATCATTCCACTGCATTTCTCTTTGTTGCTTTATCTTTTGACAACCCACCTTTTTTACAAGGCAACAACAATGCTTTAGTCTCATCATCCTCATCTT

TAGAAGCTTCCACACTATCTACATACTTATTTTTCTCCCCTTTAAATTCTTTATTTTTGTATCCATTTGCCAAAA  
TACACAATAAAAAGAAAGC

>TCONS\_00060701

GGAAGAAGGATGATACACAGGAAATGGAGTTTGCTGACAGGCCCGCTGCTATTCTCGGCGGTATCGTCGGT  
ACTATCGTCGTCGCCAATTTTATCTTCGTCCAAAATGATCCGTTCTTAAGCCCGATCGGAAGCAGGAGAAGG  
CACCTTCAAACAAGTGAGAAATGCGTGTGATTTTCTTGGGTTTGGGGTTTCTGTTGGTTTGATTTGTCA

>TCONS\_00060707

AAAACCTACATTCAAGCTGATGCTCAAAATTTGAGTTTATTGGGCCGTAATGTAGTGACAAATCAAACCAAC  
AGAAAACCCCAAACCCAAGAAAATCACACGCATTTCTCACTTGTTTGAAGGTGCCTTCTCCTGCTTCCGATCG  
GGCTTAAGGAACGGATCATTTTGGACGAAGATAAAATTGGCGACGACGATAGTACCGACGATACCGCCGAG  
AATAGCAGCGGGGCCTGTCAGCAAACCTCCATTTCTCT

>TCONS\_00060854

AGGAGATGTTTGTGGCCACAAGAGCAAGAAAACCTGGGCGTGTGTACAAGGACTCAGGCGAAAATACAAC  
AGTAAAATTGCTGAAATGGAAAAAATTGAAACACAACAAAGTGTAGATGGCAGTCAGTCTGTTGATGCATTT  
TCATCTGTTCATGGGTCCTGAACATCCAGGATGTTTAAGATTATATGGACGGGGGGTTACAAAGACTACGTTGA  
AAGGAAAAGTGGGCCA

>TCONS\_00060862

TTCTTTGCTGAAATTTCGAGGTCAGTTTCTTGGATTTTCAGCAGTGGAAGCAGAATCCATTTGCTCCAACAGT  
GGTAGGGATATACAATTTTCTTTCGGAAGAGAATTACAAGGTAATTTTGCTTAATTAGTTGATTCTTCTATTGC  
CATTTTCCATAGAAATTAAGTAGACATAGTATTTGGACTTTGGAGCAATAATTCTATTCAACTGGCCATATTATT  
TTCTTTGTTTCTTCATCGGCTTGTAATTTAGCTGCCCATTGTGTACATCTTACAGTGGACTTTTGGTGCAGGGG  
GA

>TCONS\_00060881

AATTTACACAGCTCTGTAGCCTAAGTTGCCAATTGAAATGCTAGAAAATCAATATAACTGTAACACCTTTTCAT  
TATATGATCTTACTTTCAAAACATCTTTCACAAATTTTTTAAGTCAAAAAACAATATGGTTGGTACTTCCAAC  
TCATCAGGTATTTAAGCTCCAAAATTACATAACATAAACAGCAAAGTCAGATTCACACTCTCCAATAGCAAA  
TTGGAGTTGGCTTTTACCTCTTCCCCGCCTCTCAAACCTGAATGGATCATTGATGACATCATGAGGAGCTTAATT  
TTTGTAGCTTAGATTTGAGCATGTCCAATTGTTTTGTTCTGATACTGTTGCTTTCTGCACAGTTGTACGGAATA  
GTATGTTGCCATTTCTCTGGTAGACCGTCCGAGAAGCAGGAAGGTTATTGAGCTCCGCTACAGCAACCTCGTG  
ACTTCTTACCTCCTTGAGGAGATGGCGCTGCGAGTCTGAATTGGTGGGTGCTGCAGACATGTCTTGCTCCTTCT  
T

>TCONS\_00060919

ACGAACCTTGAGGTACATAAAATATGCAAGGCGTAGAAAGAGAAAAAAAATTAAGGAGCTATTCCATGC  
TGGGACACAAATAGTGAGTGAAAAATGGAGACTGCTCAAATCACAGTAACAGCATCTTGTGCTGCCATAATA  
GTTACTGTAGTAGTGTGTGTATGGAGAGTGCTGAATTGGGTTTGGTTCAGACCAAAGAAGCTGGAAAAGCTA  
CTGAGGAAACAAGGTCTCAAAGGCAATTCCTACAGGATTTTGTATGGGGATATGAAGGAGCTTTCTGGTATG  
ATTAAGGAAGCTAACTCCAAACCCATGAATCTTTCTGATGATATAGCCCCAAGATTGGTCCCTTTCTTTCTTGA  
CACCATCAAGAAATATGGTAATAAATCATATAGCATTTTTTGTCTCTGC

>TCONS\_00061102

TCATAAGCAATTCCTCTTCCAACAGCATAGCCAAAACCAAGACCAATTCCACACCCAGCACCGAAACCAAA  
ACCCAGTTGCAACCCAGGAAGCCCCGGACCAAAGCCAGTGCCTCCAATAAGGCCGATTCCGAGACCAAAAC

CACAGCCTATGCCAAGTCCAAAAGCAGGTCCAATCTTCCCCAATTGCTTCGTCTTAACTATCGGTAGCTTCCA  
TACCAAACCCTTTTCGTCTCTGCGGTTCAATTCTCTC

>TCONS\_00061166

CTTTGAGCAGTGAGACATATTCAAGTATTTAAGCCTTTCAAGTGTTCCAATTGACTCATGAACTACTACCAAG  
TATTTACAGTTGCTAAGATTCAACTTTTCAAGATTTGGCATCATGCTGAAATCTGGAGTGGTAGTTAGCCCATT  
GGAGTAGCTGAGATTCAAATACTTCAACTGCTCAAGGTTTCGATTTCTTTGACATAACATCACATATGTCGTCG  
GGAATCCACAACCTGCTGTATTTCTCTTTTGTGTTGTCCTGGCGAACCATGTACCAAGCAGTTTCTTGAAGTAA  
ATCATGCATCTGAAATCTGTCATCATCAGATATAGATAACAAAGATCTTTGAACAAGCACTGGTATTCCAATT  
TCAGGTTTGAAACCGAAAGCATGGAATTTTTTGACCACAGGTTCTCTTCGTTTCCCCTTAAAGAAACAAGCAA  
TATCAAGCAATATTTGCTTGTCTAAATCATTCAATGCATCAATGCTCAATTTAAGTTTCCCTATCACATCATCA  
TGAGGAATACCTTCCAACCTCGTCAACTCGCTTTCCCATTTCTCTTTTTCTCTTTTGTGCAAAAAACATCCCAA  
AACTTTGAGAGCCAACGGGAGTCCCCAAGCACATTTCACCACTCGTAATGCTAGTTCCATGAAATGATCCTGC  
GGTTGAGCTTCCTTGAAGGCGAACCTGTTGAAGAGCATCAAAGCCTCATTAGTTCTTAATAGGCTAACTTCAT  
ACACTTGGTCCACTCCACAAGCCGATAGCAATTGCTTGTCTTGTGTGATAATAATTCTACTACCAGGCCCG  
AACCCTTTGTGTCTCCAGCAATCAAGTTTCTATCTGCTCATCTTGATCCACGTCGTCGAGAACGATCATCAC  
TTTTTTATTGCTCAATCTGTTTCATCAGTAAGTTGGTGCTGGTGTAAGATTGTCCTTGGTCTCTTTCAGTGTCTCT  
GAAAGCAATTTTTCTGCCAAAGCTTGCAAGTCCAAATTTGGATGCAGCTTCTCTAACATTATCAAGAAAGCAGC  
CACCTTCAAACATTTCTTGAAGTTGATCAAAAACAGCTCGTGCAATGGTTGATTGCCGATTCTCTCCCATACCC  
CATATCCCAATTATGCGAACATCAGTCTCAGAATTTGTATTGAGCAGAGATATTAAGTTTCTACTTGGGGCTC  
GATTCCGACTAGATTTTCTGCAATTTTAGGTCGTACATGGCCCAACTTGTTCAAAATT

>TCONS\_00061201

GGTGGAGTGGATGGCGTCGTGAATCGAGAGCTAGGAGAGGACAACCTCTTCAAATCAATATTGGTACTTAGCC  
TTACATGCACAAGTAAAGTAGCAGAGACTTGTACCTGACTGGGAAGAGTCCAGCTTTATATAGATATCTTGCC  
CACTAGCACCAAGATCTCTGATGTGATCAGCTCATCAAACCAAGCAAGCAGCCTTCATTTGTCCCTGTTAT  
GTCTGGATTTGCATATGCGACACACGAACAGTTTCTCAAGCACAATTCCTCGCATGTACTAAGATTCCTCCA  
TGATTGTACCAAGAAAAACGAGTGTCTGGCAACTTGATGCCTGGATACTTCAAGAATTTAACTTTCTTTTGAC  
AATTCAATGTTGTCTTTCTAACACAGCCACTTAACCAATTTTCCCTTGCCCATTTCTGTTGGGTTTTTGGGTTCAA  
ACTGATCCAAACAGCTGCAGATTGAAGAGTTGCCATTATTGCACAACTATATCCTTGACACCGACTGTAAAT  
GTCACAGTCATCTGCTGGTGGCTACCAAAGTAATTATCCCAATTCTGTGTTTGATTATTCCATAGTGAAAGCT  
GTAGAACCCCATCTAGTTGCATCACTACCCTTGCAAAGATAGAGCTGTCTGTGAGCTCATACATGATAGATAT  
TGTCTCAGGATCGGACACATATATATATTTATAACCAGGACTTGGTAGCCGAGATGGTGCCTAGCAAATCCT  
CGACCATTCATGGTCCAAACCTGTGGCGTTCAATGGAACCGTTCATGATAAATGGCTGTGGGAATCCATGA  
GGATCGAATGTCCAAGAAAACTCACCCCTGGAAGGATCATTTGTGCTCTTCCATGACCAGAGGGAACGCCGA  
AAACCAGTCTTAAGATCGATTCCAACCCTCATTCCTGGCAAAGATGTGTCACTGGGATAGTCAAACTCTGCC  
ACAAGTAATTCAC

>TCONS\_00061202

GTGGATGGCGTCGTGAATCGAGAGCTAGGAGAGGACAACCTCTTCAAATCAATATTGGTACTTAGGACCAAAA  
CCACCCTCTCCAAGCTTGTGTTTCAGTGAAAAGTTATCGGTAGCATCCAAGATGGTCGAAAATCAAACAAC  
GGTACATCTGGAACCTTCATCTTTACTTTTATTGGTGTGTAACATTCAGAGATCTTTCTTCCTTTTCTCT

>TCONS\_00061276

ATAGAGTCATCTGCCGACCAAATAAAGATACCATGAAGTTTTCCCGACTCCTCAGTATGCTGCATGCATCAT  
AGAATCCATGTTTAGGAGACAAGCCACCACTGTTGTCTGTTCCAAAGCTCACTAGAATCTTGCCTCCTTTATA

GTTATACCTCTGGGTTTCAAAGTACTGCAGGAATTGAGTAATGGTTGTGCCCTTTTCATAGGCATAAAATTGG  
AAGTTGACATAGTCTATTAGATGACCATACTTTCTCCAGAGAGCTAAATAGTGCACCTGCACTGAATCATCTG  
CATATGGTGCTATAGATGTGTAAGAGACGACATTGTTTTGTTTAAGATAGTACAACAGTCGCCCCGATGCACTC  
AGCGAATGTATCTGGATCTGCATTGAAGTGTTTATAATCTATATCTATTGCATCCAGGTTATACTCTTTCACTA  
TCTTTGTGACTGAATATATTGCATTTCTTACCCAAGAAGTAATTGAAGTAGGAGCAAAGGTGGCATTTTTACC  
ATGCACTGTGTCAACCACCGAGACTCAAACCTACCTTAACGTTTTTATGCTGGGCTTTGATGGAAGAAACCTTT  
GAAGGGGTTAGATTATCAGTGTCCCAATAAACCAGGAAGTTACCATTAGTGGCTTCTGGTGATTCTGTGTTTG  
TGTAAGTCTATGGCAAAGGAGAGGAGAAAGTGAAATTCAACATTTGGATTAATTGGGACATCAGAGAATGTGA  
CATTCTTGTATAGAGCTCCAATGTATTCTCTGAAAACCCAGGGCAGCTTGCTGGAAGTCTTCAGTTGTAGC  
GGAAATAGTCAAGAGAGATTGAAGGACAAGAATAGTGATGCAGAATTTGAAGGGCTTCATACTTTCTTGAG  
TTTGAAGGATTCCTTGTACTTCTTATTGGTATTTAACCAGAGTAAATGCCGATTAAAATACTTCTCCTTTGACA  
AGGCATTTGTTAAATTCTTCTTCAGACCATCATTTAAGGCTTAATTTCTGTTTGTTCTTTTGTGAGTAACATTTCT  
TTTGCAGACCTGGTGTGGTAGTTGGTGAACATCAG

>TCONS\_00061302

AAGTAGACAACCGGATCAGTGTAGAAGTAGCCAAGAGGATTCAAGAACAACCTGGCTGCTATCATGACTGGA  
ATGCAACAGGTGATCTACTCTTAATGTTTCGGTTCTTAAACAGTGGTGACAATGAAGGAGGAGCTTGAAGCTA  
AGGCACTCAATGTTTTGCTTTTTGGTTATATGTAAATGCGTACAATGACAATGAAGTATTACGTAGTACATATG  
CGGAGGAACCTTAAGGCTAAGGCACTCAATATTTTGCTTTTTGGTTATATGTATATGCGTACAATG

>TCONS\_00061314

AAAAAGCAAAATATTGAGTGCCTTAGCCTTAAGTTCCTCCGCATATGTACTACGTAATACTTCATTGTCATTGT  
ACGCATTTACATATAACCAAAAAGCAAAACATTGAGTGCCTTAGCTTCAAGCTCCTCCTTCATTGTCACCACT  
GTTTAAGAACCGAAACATTAAGAGTAGATCACCTGTTGCATTCCAGTCATGATAGCAGCCAGTTGTTCTTGAA  
TCCTCTTGGCTACTTCTACACTGATCCGGTTGTCTA

>TCONS\_00061343

ACCTTGATCAATAGGTGGAGGCAATGGAATATCAATTTGCATATGCTCTTTCTCGAGTAGATGGCGGCAATGG  
GCTATCAGTTCACAGTCCGACTGCGGCTCACCTAAAATTTGCCCATGGTGATACCAAAAAGTATAATTTTGAA  
TTATTCATATACTTTCAAATGTGACTCAACTGTCTCACGTGTCCCTAAAGTTGTGTTACAACATTTGACACAA  
GGACATCGTATTTTCGTACAGTTCCCCTGTTCTTCTAAAAGCATAATCCAAAACTTTTGCACCCCGATTGAGTA  
GGCTTCATCAAGTCGATTATCAACAAGTTGCATCCATTGCTTACTAGGTGCCATAACCTGCTTTGACCCTCCAG  
AGAGATGAGC

>TCONS\_00061424

AAAAAAGGAACTGAAGGTACTGAACTGAAGCTCCTCATATGACCCTTCATTTTAGGCGGATAAAACCGGTGGT  
TTTTTCACAGATCCAACTCTACCTAGCTAGCTAATCTTTTTGGTTTGCTCTCTTTTTTTCTCTCTTTTTCTGACA  
TGGGTTTTGTATTTTTCTACATTTTCTTTAGTGTTTGTATGAATGTTACTCATGATGTTACATTTTCATGTCCAAGA  
AAATTTTCATAAGGGTGTTTGGGGAGGAAATTTGAAATGACTTTTCTTTAAAGATTTTACCTTTTTGGAAAGA  
AATTATTGTTGGTGTA AAAAGTTTTTGCCTTTCTTTATTTGTGTATTGAGATTTCCAAAATGTATTTTAAGATATT  
TATATACTGCTGAAAGAATTTTATAAGGGTGTTTGGGAAATTTTGAATGAAATGACTTTTCTTTAAAGATTTTA  
CCTTTTGGGAAAGTGATAATTGTTGGTGGTATTGGTTAATTTTGAGTGAAGCTGATCTGTGTAGCCATTTGAAT  
CTCATAGATTGT

>TCONS\_00061427

AGGACATCCAATCTGGCTGCATCAGACCAAACACAGCAAGCACCTGTATCATTGCTCCAGGAAGATCATTTG  
TCCAATGGAGTCCCAAGCAGCTAATGACCAGATCAACAGAATTTTCTTTCACAGGCAAATATTCTTCATCACC

AATAATGTATGATGTTTCAATGTTATCATTAGGCATTGCTGCTCAGCATCTTTAAACAATTTTACCATATCAC  
ATGATGTATCCATCATTAGTAATT

>TCONS\_00061453

TTCAGCAGAGAAGAAAGACAGCGATAGTAGAAACATTGCTAGCAAACCTGCTTTCCTCAGTCTGCTCTACGAC  
GTCGAACAACTTTGGGTTGATCAAATGGCTGGGTGAGTGAAGCTGAATGGTTGTGGACATGGAGTCCACATC  
TTTTAGAAGGCCAGATGCCAGTAGTATCTTACTGATGTATCTGTGGTCTGGATTGTGGTTCTGGCATAAGGATG  
CAAGTTGATCCATGTTTGTCTTGTGGATGGTGGAGTTTGGTTTTCTGAGCTCATGAACCAATTCATCCTTGCTTT  
CTAATATCTTATGGTTGGACTCGACGCCAAGGTCAAGTCTGGTCCTGTAAGGTGAATGATCTAGGTCATCTCG  
ATACCAAACATCAGGTACTGCAAACCCATCATCTGTAAAGGTGGAAATGGACAGAGAAGATTATTAGTAGTC  
AAGTCATGCTTCTTCACCAAATTCAATTCTAGCAAACTCTTCTGCAGGATTGAAAGTTCCTTCCCTTCGTTG  
ACGAGATGTTGTTGCACTGCCTTTGATGTTCTTCCTATCTTCTTATCTGGGGAAGTAAGATGCCAACCAGAGC  
CTGCAACATTATTTGCTCTAGGTGTCATACCTTTGGATGTTTTCTTGCAACTATGTCATCTCTGTTATATACAA  
GGTCTTGAGTGTAACCTTCTTGAAGTTTGGAGATATTTGCCGTTGGCGCAGCAGAACTTGCAAATTTGATTTTA  
TCACTTGGTTTGGCTGGTTTTGGTGTCAAATTTGAAGTTTCTAATCTTTTTGGGAGGTGAGTCACCTTTGTGGTC  
AGAGATAGTGGGCTCCGTTGCTGCCCCCTGCTGCACTGACTCCGCGTCAGATGCCCTCAGAGCTCTTTGGCCTT  
CTAATTTTTCTCTTATTTTCTGCATGGCT

>TCONS\_00061493

CCTGGATGCTCAAGAAGAACCCAACAGATTTTGTATGTCTTTCTCAAACCTGAAGAGGTGGTGTCTCTGGGTGCA  
TATCGTTCCACAATCTTTCCTTCTTTGTTTACAAGGAATTTGGTGAAGTTCCACTTGATAGCATTTCOAAGGAA  
ACCACCTTTTTCTGATTTTAAGAACTTGAAAAGTGGTGCAGCGTTATCCCCGTTACATCAACCTTTTTCAAATA  
CAGGGAATTCAGCTTTGAACCTGGTGCATACAGTTTCTGAATCTCCTCATTTGTTCCAGGTTCTTGCCACAAG  
AACTGGTTACAAGGAAAAGCTAAAATTTCAAACCTTGATCTTTGTAATCTCTCATAACAGAATATTTAGCTCCT  
TGTAATTTGAATCTGTAAACCACATTTAGATGCAACATTGACAATAAGAAGGACCTTTCCCCTATAATTGCTT  
AAAGGTACCTCATTTCCAGTATATCCTTGACAGTGAAATCGTAAATGGATTTGGGGGATCCTTCAGCCATAG  
TTTGAGGAGAAGAAAAAGAAGGGTATCTATAGAATAAGAACAAGGCAAGAACAAGAAAGAAGAGAGCTGC  
CAAATTGGT

>TCONS\_00061589

TATGTCCAAGCGTTGGTGGACACAATTACCCCATACCTGTGTTGGTGGGAGGTAGCAGGTACCCCATGGAAT  
AGTCGAGGTGCCAGCAAGCTGGCCTGAACGCCACGGTTATCAAAACAAATTGCTAGGCACTGATCCATGGCA  
AACACTCCTACAAGATTCTGCATTTGTTTCTCCAGTTTGCCAAAACTTCTCTGTTCCACCTTTTTATGTCTGT  
CTTTAGAAGTCTGAGTTTTTGTGCCTGGATAAAATCATGAGTACCACTGACCGCATATCCATCTCACCGTTCTT  
G

>TCONS\_00061605

GGTCAGTGGTACTCATGATTTTATCCAGGCACAAAACTCAGACTTCTAAAGACAGACATAAAAAAGGTGGAA  
CAGAGAAGTTTTGGCAAACCTGGAGGAAACAAATGCAGAATCTTGTAGGAGTGTTTGCCATGGATCAGTGCC  
TAGCAATTTGTTTTGATAACCGTGGCGTTCAGGCCAGCTTGCTGGCACCTCGACTATTCCATGGGGTACCTGCT  
ACCTCCCACCAACACAGGTATGGGGTAATTGTGTCCACCAACGCTTG

>TCONS\_00061826

CCAGGAACAGTCAAATGCCAATTTTTCTCTAAATGTAGCAATACATCCTTGGACTCCAGAGTTGAAGATTTCC  
GATGTTTTGCCAAATTGCAAGCAAACGTAGTAACCGAATCAATAAAGTCATCAGCAATCTCTAAAAGAAGAT  
CTTCAACTTCAGGATCAAGCTTTCCCCGCGAATCCACCTGTAAACTAAATCCTGTATCTTTCTCTTCCCAAGA  
AGCTGATTGTTTGCTTCAGTCCCCTGG



>TCONS\_00061829

ATGGAGTAGAAGGATTAAGGATTCAGCTGAAATGTTGGTTTCTGCATCTGCATTGGTCGCTCCTGTAAATTGG  
TCTCAAATGAAAGGATTAAGATGATATATTGCCTCCTTTGTCAATTTTAAGGAACTGGCTTGGATTTGTTTTGG  
AGAACATAATGTTGTCTGGTGAGAAAAGAATGCTGTAGGGAAACGAGCATACTGTTGATGGAGGCATGACC  
GGTCATCATCAAAGCTGAAATATGATTTCTAATGTATAGGTTAAACACCACAGAACTATTTTATTGTTGGTAT  
AATCTAACTGTTGTACATGATATGAAAACCTAAACACAGGCAAAAAGTGTATCTCTATCTTAATATGCTTTAAT  
GTGTTATAACATATAGACCTAAAAACAGATAACATGGAATGTGCAAAAAC

>TCONS\_00061868

GTTTTACCTTGAAGGAGTACATAGTTCATTTTCATATGCTTGCTGTGACAATTTTTTTAAATCCAAGCAGGAACA  
CATCCTATATAGAATACGTACAAGCTACTATTTTCATGGGAGGCCTTGAGTAATTGGGGGGAGGCTCCCAAC  
AAGTTACAATCCTAAGCAAAATCACACTATCAGTCAAACCATTTAGAAGCTACACTACAAATCCACATTGCA  
AATCT

>TCONS\_00061898

TGGAGGAATATGTTGGCTTCCATGAACATGACATGCACTTTGGACTGGATGCCCCGATCCGTCTAAACTGTCTA  
ATTCTCAAAATCTGTTGTAAACTTCACTTTGAAACTGAGTTCTTTAACCATGCTTGTGCCGGGATATAAGAAG  
ACCTAAAATCGATCAACGATGCCCTTTGTGGGTTTTACCAATTGACCTCTCTCATTTGCCTTTTTCTCAACTCA  
CCAT

>TCONS\_00061909

GGGCTATCACAGTCAGGTGCGAATTGATTACCCCTATTTGTAAACTACCCCTCTTCCTATTTAGGGAGTTGAG  
GCGAAAAATGGCTTGATGAACCGTTCGCCACGCACCGGCCACATTCCTTGCTGGTGACGGCGTTTTTTTAGC  
TATGCATTACACACCTCATGTGGATCTAGCTTTCAACAGCGTAGAACACATTATGAGAGATGTTGAAGGGGG  
CTGGTTGCTCCGTTA

>TCONS\_00061939

TTTTTCTTTTTTGTGTCAGGAGGCACGTGCAGGAGAGAAGCTCAAGGAATGTCAGGATGGTTTGCGAGCGCAG  
TTGGAGTAAGCAGCTGATCTGAACCTTCTTGATTCCACCGTTTGGCCGAACGTCTTCAATACTGTAGCCGAGGG  
GTGCTTCGTAGAGTAAGGATTTACTACTAGACTTTTTACCACCTTTAGACTCCATTAGATCATTACGATATCA  
AACTTTTTGAATTGGTTTAAATCTGTCTATCCCCGAATAAATTAATATCAACCTCCAATAATCCTACATCAACG  
AAACAAACGAATCAGGAAACAACTCAACAAAAAATATTAA

>TCONS\_00061948

CAAACTCAAAATTAGATATAAAAAGCAACGACGTAAATAAAATAGAGCTAAAAACAACACGAGTAATAAG  
TAGCATAATTTTATAACAAAAAACCGGATATCAGAATCTCAATTCAGAGCCATTAGGACAAAAACACTACTC  
AAATGTCGCTGAAATTTTAAACTAGAACTTAAAGCATAAACCTAAAGATGCGGTTTCGGTTCGATTAGGGCGA  
AATACGGTTTTACTTGGATCGCTGCCTCATCTTTCGGCGCTTCCTCTTCAATCTCCTCATAACGTTCTTCTTCCA  
CTTAGCTCTCATTCTGAATTGGCGATGATCAAAGAGTTCTTTTTACTTATCAGAGCGAATCTATAGATGGAAG  
AAGAAATGCGGCAGTGATGGGAGGAAGTGAAGTT

>TCONS\_00061972

CTAATATTTGAGGCACATTTTGGGCAATATTAATCAAGTATGGTGATCATGAGACGGACATTAGCCTGCTGCA  
CAAGAATCAGAGAGTTTAGCATTGACTTTGCTGAACAAGAGAGAATTACAACATATGATGGCCTCGAGAGCT  
GCATACGGAACCTGTCAATCTTATGACAATGAAAGCGCGACTAGTAGAGGTGATGAG

>TCONS\_00061976

AGACATGCATGCTGCTACAAGCTTCCCTGCCAATGGACTGAACTCGACTTCGGCCTGGTGTTGCATGTACAGA  
ACTTATATTTTCTTCAACAACTCAATGTCCATATCAGTAGCATTACTAAACAATCATCCATCAGCTCTACTCG

TCTGTTTCGATCAACGACTGTCTCACCTCAACTACATACAGGACTAGTGTCTGATAATCCTGAGATTCTTGTAGC  
 AGGAAGTCAGCAAGCAGCTGCGGATGAATTGGGGTTGCTCGAGATATCTACTTGCAAAATTTCTCTTATCCTG  
 ATCCAAATGCTGTACCCTAAGTTTATAAGAACCCGAGAGTACGCTTCCATGATTAAATGCCCAATGTCCGTGC  
 CATACTGGATTTTTGTGACATTGAGGAATGTCTGAGGAAGGTTAGGATATTTAATTTTGAGCTGCTGCAGAAG  
 AGCTTCTGCTTGGCTCAATAAGACCTCCAATTTGTCTAGCTCAGATATTGGATCTTTTACGAAAGACCAAGGT  
 CTTCCGACTGGAGACTTTCCACTAGCTTGATCAGTTATTCTTTCTTTCCATGCAAGAATTGCTCCCTCTAACCTG  
 TTAACAACCTTCAAGTGCAGTGTTCAGATCTCAAGTTCAAGGAATCGAACATTTCTCAGCAGAGGTTGATT  
 CTGCGGTCAGGATTCTATAAAGGTCCTCGCCGAGGCTTTCCCTCCCAGACTTTGGAAGTGCATCCTTGATAAC  
 TGATGGAACCGGCATTTACAGCTAAGATGTTTTATTAAATAGCTTTTGCTGCCTTGAATATTTGATTGGCCAATT  
 TTCCCTGATTCACCAATCTCTTTCTTTTCTCAGTGTCAGAGAGCCCAGCGATGGGTACCTTGGGTGAAGGAAGGCA  
 CCACCTTGTGCTCTTTTCTTCTCCTCGACTACTCACTTCCGTATACCAAACTCAGTATTAACCATTGAATCCA  
 GCATTCCAAGAAGCATGGAATCCAATTTCTGAAGTGCTGGAAGATTGATATGGATGTCTGCACGAGCTTTTGG  
 TGTCATTATCTCCAACCTCTGGCCATTAGAACCCTTTGTTTTGCAGGAACAACTCAATCATATGTTTGGTAG  
 GTGAGAGCAGCCAATCCATTTCCCCTTGCCATTTCTCTTCTTCTCTGCAAGTGGCTCCAATTTCCACAAC  
 TCTCCAAACACAGATGCAGCAAGATTTGTAATGGCATTGGACAATGCTAAAGCAGTCGAAACTCCATTGCTT  
 CCTCCCGTCACATCCTCACCAAGCAACAATTTTGCAAATTTGTCTTTCATTGTTTCCACAT

>TCONS\_00062049

TGGGTATATATATAGTGGCCTCAAGAGGATTTGTTGAATAATCACCTCACAAATGGAATACCAGAAGGGACT  
 TTTCTCATATAATCCTCATAGTCAGAACCAAAAACTGCTTTAGGAAAAATTCCTCATAAGGTATCCTCCCCG  
 AGAAGAATTTCCACACAACAACCTGCAATGCAATGGTTGATATTGGATTACAAAGCATTATTTGAGTACCAA  
 TAGACCAGATGAAGAAACCATTATAACCAGGGTGCCGGACATATCTATAGATCCCATGTGTAACCAACTGAT  
 GACTTTCCTCGTGATAAACCTTTATTAGATGAGTGAAGGCTACGCCTGCGGTCACAATTGCCAGCTTCCTTATG  
 ATTTCTCCAAGAACAACCAATGCAAGGCCGAAATTACTTATCCACCAATATTCCTTTAAGCCAGGAAAGAAA  
 TAGAGTTCAATGAGGTACTCTATCAAGGAGCATATCATTGCCAGTAGATAATGTTTGCTTATCAAAAGCGACT  
 TAAGAGTTACGTTTGACTTCCCATGAATGAAAAGTGCCAGAATGTACTCGGAAACATGGAAGAATATTATTG  
 AAATGAACATTTGCGATAATTGTCTGCATGCTGTATATCCAAAAAGTTCTGCCATTTACACCAATAAGTCAA  
 ACAACCTCTCGTCGAAATACAAAAATTATTTCAATCTGAGTCACCAAGGCTAGTACGCATGAAACCATAT  
 GTTGCAAATTTTAACTCCACACCTACAAATCGGTTTCGCCGGAGAGAGAGATCGGAGTTTCTAATTCCGATGG  
 CCAAAGAGGAAATACCCGG

>TCONS\_00062141

AATATTATCAAACCAATTGCAACTATAAGCCATATCCACCATTTAATTGCTTCCCGAATGGAGGCACTATATC  
 CACTCTGCTCATCCCAAAATCTTGACCACAACATAACACCACCATACTTGCTCGACTTCTTGATCACCGGAAG  
 AATTCGCCGATCAACACATCCGCCGAATAAACCCACTTCCGGCAGCCTGTGGTGCCGCCGGAAGACCCAA  
 AAATATCCTTGTAGCGTTCACCGACGAGGTCCACCGGATCCAAGAATTTTCAATATTATCAGTATTATTAGGA  
 GTATACTGACACGGAGGATTATTGTAAAATTGAACCCAAACATTGTCAAAAAGACCTGTATTTAAAGCAGTA  
 CCAAGCAAACCTATCGGGAAATGGACATTGTGGAGCTGCTGTTAAGTACACTTTTTTTCCAATTCTACCATAAT  
 CTTTCAAGTATTTAGCTAGATCGTCATAGTAAAGAGACGATCCAAGCTCAATATCAAAATCAATTCCGTCTAG  
 AACAGCACTACCTAAAGGCCTAAAAGAGGAATTTGAATTTCCACCCAAAAATGTGTTCCATAAATAACGTGC  
 AAAAATTTTGCGCTTTCTCTTGAAGCTAAAGAGTAATTTCCAGCTCCACCACCAATGGATAACATTACTTG  
 ACGCCTAGATTTTGGCAAAGCTTGAGTTCTGGACCGACGGCGG

>TCONS\_00062149

GCTGCAAAAACCTTATGGTGAGCATCTCATATTACAGTCACTGAATTTGAAACCACCATGTAACAAATTCGGCT  
TAAAGATCATCTTTCTTTGCAGAAAGACCAAGAAGTTTAGCTAGCTCCCCGTTTTTCATAGGCCTCCACGGTAT  
CATCTGATCCTCCGATATGCTTTCCGTTAATGAAAACCTTGTTGGCACAGTACGTCTGCCAACGATCTCACTAAG  
GGCATCCTGAATACTCCAGCCATCATCTCTCTCATCAAGCTCAACAACATAAGGTTTTTGGCTTCAACTCTTTAA  
ATACAGCCTTTGCTTTCCTACAGTATGGGCAATAGGATTTGGAGAAGATAACAATGGAATGAGAAGAAATTG  
TTTTCTTGACAAAGGCAGAGGCATCTCCTTCTCCAGCTTCAGCAAATGTTGATGTGTACAACAACACAGTCAC  
TGATACTA

>TCONS\_00062346

ACTTAAGTAACCCACAATAGACAATGCCTACGGTAATGAGGAGTTGAATTGCAGGCATAAACTAGAAGCATT  
TTAATCTGGTGTTGGTGCGCCTTGGTTAAGCTCTGCAAATCTCATACCCACACGCATAGAATGCTTCAAGAAC  
TTCTCAGCACATCGCCTGACACAGGTCTCCTCCTGTTTGTCCAAAGTTTTGCGTTTGAAAGTGTCTACACAATC  
CGTGAAACATCTTTCAACCAGGGAATTGTACATTCTCAAGCTGTACGGATTTGGAGCTGGTCAATCATGGCG  
GCCATTTTAAGCTTATCTGCTTCAGGTAGCGAATCCAAATCTCCAATCATACTCTTGTCCATCTTGATTCTTAA  
ATCTGATCCAACGCTATATGCAACTACTGCTTGTGTTTTGG

>TCONS\_00062429

GCTACTGTCTGCACAACTAAGCAGATTTTCACTAGAACCTATGAACCATCATCGTCTTCGAGGTTGTTGACTCT  
TTCACACTCGTCAATCCATTCACTATATATATCAATAGGCTCTGTCAGTGCCGTAACAGTTGTGCTGAAGCTCT  
CTTGACAAATCCTGCATGTTGCCTCCCCAATCAAGTTTTTTCATATCACTGATGAAGAACAGAGATTGAGATCG  
CCTTATGTAATCTGCAAAATAAAGATTGAATTT

>TCONS\_00062430

GCTACTGTCTGCACAACTAAGCAGATTTTCACTAGAACCTATGAACCATCATCGTCTTCGAGGTTGTTGACTCT  
TTCACACTCGTCAATCCATTCACTATATATATCAATAGGCTCTGTCAGTGCCGTAACAGTTGTGCTGAAGCTCT  
CTTGACAAATCCTGCATGTTGCCTCCCCAATCAAGTTTTTTCATATCAATGCGACATTCAACGCTGGTGCCATGG  
CTACAGAAAGGACAGCTGAAGACGGTGTCAAGTTTGTCCATTCTCTTTGGAGGCGGCTTTGATTTGCACTT  
CCTCTTCCCCATAGCTCAAGCAACTGATGAAGAACAGAGATTGAGATCGCCTTATGTAATCTGCAAAATAAA  
GATTGAATTT

>TCONS\_00062501

AAAGCAACTTCTGTAGCAACAAATATACAAAACAATTCTCAATCAATTCCTGAACATCAAGTCCACCTCATT  
ACCTGCAGAAAACCTCAGGAACTCGTGAACCAACAATTGAGGTAATAATTCAATGCTGGGAAAAGCAAACCCA  
CAAAGGAATCTTCAAAATACACCGCAAAATTTACGAATCCCCAGCAATGAATCGCCGGCAAGCTCAGTTACT  
GTCAAAGTTTTGGAGTAAAATTAAAGCAATATCAGGAGTCCAGGTAAAAA

>TCONS\_00062502

TCAATCAATTCCTGAACATCAAGTCCACCTCATTACCTCAGGAACTCGTGAACCAACAATTGAGGTAATAATTC  
AATGCTGGGAAAAGCAAACCCACAAAGGAATCTTCAAAATACACCGCAAAATTTACGAATCCCCAGCAATG  
AATCGCCGGCAAGCTCAGTTACTGTCAAAGTTTTGGAGTAAAATTAAAGCAATATCAGGAGTCCAGGTAAAA  
A

>TCONS\_00062551

ATTCTTCATAATAAATGTTTTTATCAATAATACTAGAACGGTATCTTGAAAGATAATATGAGACCAAAAGCTT  
GTACCAGGGATCTCATTCCATTTTCATAAATAGATTGCAAAAGTTTGCACACTAACAATTCCTTTCCAATTCC  
TTCTACAACAAACCCAGCATTACATCCTTATATTGTCTTCTGCTTTGCCTTCATTACAATCTTATACAACATCCA  
GAAAATTACAAGCATATCTTTTACGTTTTTTTACTTCATGATTGTCAGCCGTGACAATCGTGGAGAGACAAACG  
AAAATGATGCAACTCAGAATGCACAGTATGGGAAGGAAGATTCTCAATGGCGTGTGTTTGGAAAACAAAA

TGTTACTGCAAAATGCGATCAAATTAGTCAACGACTAGATTCTACTATTCAAAACTGATGGCACCATGTTGA  
AGCTAAGAAATTTCCGCAAATCGAAACAACCTCGTCATGGAGGCAATTTGTGGGAATCAAAATACTCAGCAA  
GGAAGTCGAAATTTCCCACTGCTCATGTTGTCTGTCTGTACATAAACATACTGGAACAAGTCACATGTCGGAC  
ACAGACCACAGATATGCTTCCCTTTTCGGTTGCTTGTCTTCATTGGTCCTCTTGAACAACCTGCTTCTCATATCCT  
GTACTTCGGTCAACCCCATCCCAGTGTGCGCCCTGGTCT

>TCONS\_00062689

TGTACTTTCTTGAGTTCAAACAGTTTGCTCTGTCAGAAGAAGATTATTGAAACACCCATCGTCAAACAGCCCA  
CAGCCACCCATGGACTCAACCGTTCACCTATTCTAGCAGCCTTCCAAAAGAAACCTCGAAACCCAGTTCTCTG  
TTCAAGAAGTGCAGGGAAATGCATCTTCACATAAGTGCATGTACAAATCCCTAACAGCACTACCGTCAGAAA  
GGAGTGGAATTGAAGAGAGC

>TCONS\_00062704

CATCTCTCTGATTATCGATAGGTGACTGACCTTGAATTTACGCCCCGACTTGCTCTTCTCTTCGAGGTAGCAGAC  
AAGCGCTTGGACAAACGGTTTGGATCTGGAGATCAGGGACTGTTCTAAATCCCCCATCTTCATTTATTTACT  
GGAATTTGCTCTTTTCTCTTGATTTTAGGCTTGGTGGAAGGTAGAACTGATTAAGAGAGGAA

>TCONS\_00062738

GTTGCATGACACTAATATACTTGCGGTAGAAAACCTGAGTAAATATCTTCATCCGTACAGGCATGTTTACATAG  
ACAACATCAAAAAATTAGAAGAGCTAGAACGCATTTAGCGGCCTCGACCACGCCCACGTCCACGCCCACGT  
CCGCGCCCACGCCCCAAAGGTTTTCCGGCAGTTGGCTTCTTAGGCTTGACCCTAGGTGTTTCTTCCACCAGCA  
GTGTCTCAAGATTCAAGCTGTCAGGAAGGATATAATAGCGGATGTTGTTACCCCTCACACTCAGGTGATCCAA  
TGTCATGGATTCTTTCTTTTAGCGTAATTTTGACAGCTTTCAAGTGTGTGTTTCATGCTGACATCCACACCTGT  
AATAGTTCCATGAACAACGGTGCCGTTCTTGAGCTCCATGGAGACCGTCTCATTATTTAACTTCATTAGGAAT  
CTCACTAGCTTCATTGTCGTCGACGAAGATGTACAGACGCTTAGGGTTTTACAGAAGCAGAGAGCAAATTGC  
TTTCTTTCCAATT

>TCONS\_00062775

CTTATTAGCTTTAAGAAACAAGATTCCTAGTTTGATTTGACCATGGAATTATTGTCTTGAGCTTTCTGTTACTG  
TTCTCCTCTGTCATCAGAGTCTCTTTCTTGCTTTGTAATTGTTGTTTTGTGGTGGTTTAGTTTTACCGGTGGCCT  
TGGCGGCCTCCTGTTGTATGAGTATTTAGGCATCTTATGGCTATTATTGTCTTGAGTAGACACGGCTTGAAGC  
TGGGAAATATTACCATGGATTTGG

>TCONS\_00062780

TTTTACGAGAACCGCATGAAACTGGAAAGAAAAGCAATGAGGAAAATATGGTGTGCCATAAAAAGAGACAA  
CCAGAAAGATCATAAATCAATGACTAGTCCCAAAACACTCTTCGACTCAACTGCAATTTAGGTGAAAGAGTT  
TAACTACTATTCTTTCATGCGACTCAATTTGTGATTGAACAGCTATTTAGTTAGCTTTGAATGCAGTACAGCAC  
TTTATTCAAGGTTAAATAGAGTATTGTCCAAAAATAATCGCTCAAATCATTATAGGGCCTGTGGAAAAGAATC  
ATTAAAGGACCCATAGCAGGTTATTCTCAAAGGTGGAATATTTTGAGCCCCCTCCCACTTCAGCAGTTGGTGT  
GGAAGCTTGCAACCAATATTTCTCTCTTGTCTAGGCTTTGCTCCTCACACTTCTCTCTGTTCCACCCAATTGT  
GGCTATGCAGCCAAGGGCTTTGCATCATTTTGAACAAACTGAATACCATGGCCTGGATATATAGTTGAGGAA  
CAAAACCAACATTTCTCCAATC

>TCONS\_00062782

TGTAGCATAGTGTCCAAATCCATGGTAATATTTCCCAGCTTCAAGCCGTGTCTACTCAAGACAATAATAGCCA  
TAAGATGCCTAAATACTCATACAACAAGGAGGCCGCCAAGGCCACCGGTAAAAACTAAACCACCACAAAAC  
AACAAATTACAAAGACAAGAAAGAGACTCTGATGACAGAGGAGAACAGTAACAGAAAGCTCCAAGACAATA  
ATTCCATGGTCAAATCAAACCTAGGAATCTTGTTTCTTAAAGCTAATAAGTCATTCGTAATTA

>TCONS\_00062822

TTGACCGTCGCGACAACTTGCCGTCACAACAATGCAATTTTCAATTAGAAAAGTTAGAATGAAAAGTCAAAA  
TCTTGTTAAGAGCCTCTTCTAACAAAACTGAGATTGTTCCATTAAGTCAAGGACTCAATCTAAACATCAAAA  
CACAAAATTCCATCTGATTAAGAGCTCCATCTCCATCAAAAATCACCTTCTTTTAGCATACTCTTAAGATCATCA  
TCACTCAAATCTTGAAGCCCTAACAAAGCAGAATTCTTTTTTAGACTCTCAAATGTAATGAC

>TCONS\_00062823

GGAGAATAACACAAAAGGGTGCAGTAAACATCTGTATATATATTTCAATGTGTTTTATGTGCTTACAAAAGTT  
AGAATGAAAAGTCAAGATCTTGGTTAAGAGCTTCTTCTAACAAAACTGAGATTGCTGCATTAAGTCAAGGAC  
TCAATCTGAACATCAAAAACACAAAATTCCATCTGATTAAGAGCTCCATCTCCATCAAAAATCACCTTCTTTAAG  
CATACTCTTAAGATCATCATCACTCAAATCTTGAAGCCCTAACAAAGCAGAATTCTTTTTTAGACTCTCAAAT  
GTAATGACCCTTTTATCCTTATCCATTAATAGCTGAAACCCTTACATAATTCACCAATCAAACCATCCCCACC  
TAGTTTTTCAGCCATAAGTGCGCAAAAAATCATTGAAGTTGGATTTCTTGAATTAGCC

>TCONS\_00062897

AAACAGGAGGCTGATGCACAAGAAAGAATTTGATTCCTCCTATACAGCATTCACCTCAGATGGAGCAGAGTA  
TCTGGTCCAGAATACCGACATCAAAGTGGTTGGTGTGATTACTTGTCTGTGCGCAATTAATCCCAAGGATCAG  
CTCGCTAAAGTTCATCAACTTCTTCTGGCTCCTAAAGTAAGTATAACATCCATTTGCCCATTTTCGGTTTACT

>TCONS\_00062898

AAACAGGAGGCTGATGCACAAGAAAGAATTTGATTCCTCCTATACAGCATTCACCTCAGATGGAGCAGAGTA  
TCTTGGTCCAGAATACCGACATCAAAGTGGTTGGTGTGATTACTTGTCTGTGCGCAATTAATCCCAAGGATCA  
GCTCGCTAAAGTTCATCAACTTCTTCTGGCTCCTAAAGATATAATTCCGGTGAAGGCCTCAAGCTCGATGAT  
GCCGTCCAGGAGTTTACACAATTCATGCTACCTCTGAGGCTGAATCATG

>TCONS\_00062904

CTTACCCTTGAAACCACCTTTTTGTTGGCCACTGAAGTTTTTGTGTTGGGAGATTTGCCAGAGAATTGGCCAC  
CAGATTTTGGGCTCTGACCTTTCCCTTGTTACCACCATTTGGCTGCTGCAGGTTTACCATTTTGCTTAGCAAAG  
GCAGGTGTCGCTGGACCTTTCTTACCGCCTGACTTGTGCGGTGTAGCTTGTTTTGCTTTTTTGGCAAAACCAGC  
CTTAGCGGGTGGAGCAGGTCTCTT

>TCONS\_00062923

GATTGCCAACTATACACATCTATCTCTTTTACCACCCCAACTTCTCTCCCATTTCTTGAATCTCTATATCCAA  
TATTATTCTTTAATTGATGTGGTTAATATCTCAGAAATGGCAATCGCAGCCGCCATTATTCTTCTATTGGTCTT  
CTCTTCCTTTTATCCGGCCTCATTATCAACTTCATTACAGGCACTTCTCTTCATTCTAGTTTCGACCCTGTTTGGAAA  
AACATATACATAAGAATCAATAAAGAAGTTACAGAATTGTTATGGTTGGAAGTCAATATGGCTTTTTCGACTGGT  
GGGCAAATGTTAAGGAAAAGAGGATGCACTAGTAATCTCCAACCATAGAAGTGACATTGACTGGCTTGTC

>TCONS\_00062951

CCTCCCACCAACAGCTTGATTATCTATACTATATAGCAGATATTACTTTCTATGGAGCTGAGAGATCTATGTG  
AGAAGCGATCAAAAAGCATCTGGATGAACGCAAGCAAAAAAATGGCAAACAGAAAAGAAAACACAT  
GCGTAGTAGTGAAGAGGTTAAAATCAAGATGGGCCACAATGGAGTTGACCACCCAAATGACATACTGTAATT  
ATAGAATGCTATCAACGGATTTCTATACAGATAACTAAGGAATCAGATCTCTATCTAACTCACCTATACATTA  
GTGATCACCATTCGTCATATTGATGATAGCTCCTTCCAGGCCGTTTTGCCTTTCATCAGAGCACCATTAGTCAC  
GTCAGTCGCTGCTCCTTGCAGGCCATTCTGCCTTTCATCAGCATTATCGTTGAAACCTTTCTTCTTATTTAGACC  
ATGAGCAGACATAAGTTCATAGAAGTTGCGCATCAGCATTTCTTCTCGACCTGAAGTCTGTGCAATTCATCT  
GACATTGATTTATGGGCATTCAAGAGTAGTTCACTTTCTTTCTCCAGATGCTTCAAGGTTTCTCCTGCGTATTTG

GGATCCATAAAAAAAGTTTGATCTTTCGCCACAAACCCTTAGTGGCTCGTAGGAATTCGCTCAAAATCAGG  
CAATCCCGC

>TCONS\_00063108

ATAATCTTGAACCTTCTTTCCTCCATCCCGCAAAATCTTAATAGTAGGGAAACCCTGGATCTCATACTGCGTTG  
CAAGTGCTCTATTTGCTTCATCACTAGCATCATACTTAGCTAGAACAAATTGGAGGGTCGTGACTGCTCAACTCT  
GCGGCAGCTTTTTCTACTCAGGAGCAAGACTCTTACAGTGCCCCGCACCTTGATTTTCTGCAAGAAGCTGTTTC  
TGTAAGCTTGAACCTGTAACCAAAATTCAACGACGGTGAAGTTGTGCTTGGCAATAGTATCAGTGAGGTTAGA  
ATGGTCCAAGGTCAACACATACTCCTTTTCCCCTTCTGCAGCAACACAACTGCAAGAAGAAAGGCTGCTAC  
AATTACCAAAATGCCCCCTCATTTCTCTC

>TCONS\_00063171

CCTGCTGCCATGCTTGGATTGCCAAGCCCCTTTTATCCATTCGCCCCACTCAAAGCATCGCGTAAAATTGAAGG  
AAAGTAGCGCAAAGTTTTCTCAGACCAGGTATGCTGGCTAGTTGCTAGAATCTGTTCTAGCATTGTCTGAAGA  
TACAGTAACTGATCAAACCTCCCCGATTCCACGAGTTTTGATTATGATTGCAAGAGTAACAATTGTTATTCTATT  
TAAAGTCTCAGTAACTCAGTTGGACCCTTCCCTTCCCTCTTCACATAGAAAAAATCTCTCAACGACAAAATC  
AGATTCATACATAAATTCTCAGCCAATCGGAAAATGCGATGATCTCCACGTTTCCCCTTCAGTGAGAAATCA  
TTTTGGTGACATCATACATCAAGGTCTTGCTCTTGCTTGATACCTGTAGAGTGAAAGGAAACGATAGTTAAG  
AATTTCAAACACCAAGATCGTGTTTCCAGGCTTGGTCAATGTGGTGGGATTCTCGATGTCAG

>TCONS\_00063398

CAATTCAAGAAGGCATCGATGATTGCTGTGTAAGCAACTCGATCAATATGCATGTTGTTGGATGATTTCAATT  
CTATGACAATCTTTTGAACCGAAAGAAGATCCTGAGCATGACCAAAACCCTTTAGCAACGTAGTATAGGTGA  
TTACATCAGGGAAAATGTCATCATCATCAACAGTTTGTGCTCTGACCTTCATGTCTCAAAGAACTGCATTGC  
AACATCCAACCTTCCAGTCTCCACACATGCAAGGATTAGTTTATTATATGTGAGCTTATCCAGGTTCAAGTCCGT  
GTCTTAGTATTTTCATCATGCAAACCTTAATGCTGCCTCAGGACAACCAGTGCTTATGTACCCCTTCATCAATAAG  
TTGTAGACCAAGACGGATGGATATCCGCCCTCGTGAAGTACAAAACCATATCGTGCAAGAAGACCATTAGCA  
CGGCGTAGATCCCCTGCTTCAATTAGAGAATTCAGCAGACCACTAACAAGGGGTGGCGAAAGGTTTGGACTT  
CCAACAGCAGTACCTTGTTCAATAGCTTCAAGTAATTCAAATGCTTGATCAATTCTTCGGGCATCACCCAAAC  
CCTTTAGAAGTGTAGCATAAGTGATATTATCAACACCACAACCCTCTGGGCCTGACATTTTCATCAAAGACCTT  
TAAGGCCGATTCTATATCAGCACAATGAACACAAGCCTGCATCACTGCATTCATCACAATGGTGTTCACCG  
CCCATGTCTGTTTTTTCGCAATCTCAATTTCTCAAATAATCTGGTGGAGTTGTCTACGGCGAGTGAGCTCAACGA  
TGCGGGAAGTGAGGGGTTT

>TCONS\_00063448

CACCTGACAACCTCCCAAAGCACAAGAACTTCAGCTCCTAATCCCGGGCATCATAAGCTTACCAGTGGGAA  
ACAGAAGATTGTGAGTCCAGGTTGTTGTAGAAATTGAGTCAACCGCCGCCGATTTTCGGGTTTCCGGTTAATAG  
GTTTCTTCCGCAAACCAAATATTTCTTGACCAAAGGTACATGAACCAGAACTAATTTCCAGGCCAAGAACC  
AACCTAAGAGGAGTAAGGAGAGGACGAAGATGATAGCAAGAAGGGGACGAAAGAGGAATAGACTCAGAT  
ATTCCCACGATGATACGGCATTACAGCTCGTAGGA

>TCONS\_00063449

CACCTGACAACCTCCCAAAGCACAAGAACTTCAGCTCCTAATCCCGGGCATCATAAGCTTACCTATACAGT  
CAGTGGGAAACAGAAGATTGTGAGTCCAGGTTGTTGTAGAAATTGAGTCAACCGCCGCCGATTTTCGGGTTTCC  
GGTTAATAGGTTTCTTCCGCAAACCAAATATTTCTTGACCAAAGGTACATGAACCAGAACTAATTTCCAGGC  
CAAGAACCAACCTAAGAGGAGTAAGGAGAGGACGAAGATGATAGCAAGAAGGGGACGAAAGAGGAATAG  
ACTCAGATATTCCCACGATGATACGGCATTACAGCTCGTAGGA

>TCONS\_00063563

AAAAATTTAACACAGATTCACCAGATTGCCTTGTGCAGTTCTTGTAAATGTATATTATGGTCAATGTAGTTCTTG  
TTCAAGGTGATAACATTTCTAGATTCTTTTCCTGTATTCCATTACTTCAGTTTTTGTGAGATATAGGTTGAGA  
AAACAAGTTGTAAATTTCCAAGTTGGGAAATGTAGCCTTTGATCAGCACCTTTCAATAGGTGAATTACAGGTA  
AATAGGAATCATG

>TCONS\_00063598

TTTGCTACAGTTGTTTCCATATCAAGAATTATGCCTACATCCACCTGCTTTACAGCATTAGTTCCATCTTCACCA  
CTTATAGGCATTATGTATTGGAAAAAGCTAATGATGGAGACAAGTTGAATCAAAAGAATTAGGAAGTGGCAT  
CTTGGAATTTTGCATTTGAAAAATCTGTAATCCCAGAGTTTGGAAAAACAGTTGTGCTTATGCAAG

>TCONS\_00063666

ATGTTTGATATAGCTCCAGTCCTCCCAAGATGCTTCATTTTCACTCAAATTAGCCCATTGAACCAATACTTTCA  
CCCCAACTCCATTATTGACCTTTACCATTTTCTCTGAAGAATAGCGACTGGTTGAATCAAGATTTTCTTCTC  
CATCGCAGAGGGGAGGTTGTTGTGCTGGAACAATGGAGGGACCTATGCGACGCTTCAACTGGGAGACATGA  
AACACTGGGTGTATTTGTGACCCAGGTGGAAGCTGTAATCGGTACTGCTTCAGGTTTGAGTGGAATCTGATGA  
TCATGGGTCTCCTTGGTGGCAGACACTTTGGTTCAGCAAACACTCCTGGGAACTCAGCTATAATGTCCTGAA  
TCTTGTACGCCAAGCTTTTGGATCTCCTTCTCGAAGTAAGGGCAATCAATTTTGGAGTTGAAATTATTCGAGT  
AGGATCGCCCCACAGGAACCTCATGATTCTCCATCATCCT

>TCONS\_00063670

CACTTTTGTCTTCCCACCAACTGGAATTGCGTTTCAATGGCGATAACGAGTGGCTTGGCAACCTCTTGTGCAG  
TTGCAGGCTTAAATCTAAGGCAAAATCAGTCGTCGAAGCATTAAAGCCGTTTGGTTTATTGTACGAGATCGCA  
CTTGTTGAGCCCTAGATGTGACGTTGGTTCGAACCTCAGTGTTTAAAAATGGTGTTAAGGAATCCAAAGCGTCC  
AGTTTT

>TCONS\_00063734

AATGAAAGGAAAAACTGCATATAGGACCTATCATTATACCGACTTGGAATCATCTTTATCCATTTGGCGGC  
ATTGGTAAGTGCAGAGCATTTGGTCTGAAGTTTCAGGATGATCGTGAGAAGACTCCGGTAACGGCGTATCCTC  
GTAGATGATGAGCTGCCGATTGCCGGAGTTCGGACTGCCATCTTCAGGTTGCTTGCTCTGCGCCCTTCGCTTCA  
ATGGTGGTGTTCTCAGCATCATGATTCCTTCCTTTTTC

>TCONS\_00063840

TGGCTTGTAATTTGGAACAGGTGGTGGCATAGGTTTTACTACCGGTGGCTCGTATACCGGAACCGGAGGAGG  
CAGTGGCTTCACTACTGGTGGCTTGTATACTGGAACCTGGAGGAGGAAGTGGCTTTACTACTGGTGGTTCTGGT  
TTGGGCTTAGGTTTGTAAGTGGGAACCTGCAGGAGGCTTTGGTTTTGGGGGGCATGGCTTTTTAACTGGAGGCTT  
TGGTTTAGGTTTGTAATAGGAACCTGAAGGAGGATTAGGTTTTACTACTGGTGGTTCGGGTTTAGGCTTGGGT  
TGTAATGGGAACCTGAAGGAGGCTTTGGTTTTGGTTTGTAACAGGAACCTGGAGGAGGCATAGGCTTTACTA  
CTGGTGGTTCTGGTTTAGGCTTGGGTTTGTAATGGGAACCTGGAGGAGGAAGTGGCTTTACTACCGGTGGTTC  
TGGTGTAGGATTGTAAACGGGAACCGGAGGAGGATTTGGCTTTGGAATTGGAGGTGGACATGGTTTTTTGAA  
AATTGGAGGAATAGGGGGAAGTGGGAAAGGTGGCAAATTAGGGAAATGTTTCATCCAAGGATGATCTTTAG  
GGAAAGGTGGCAACGTTGGCAATGGTGGATATTTAAAGTGAGGCCACAAGAAAGCAGAAAGTGCATAATGCT  
GTTGAGAATTTAATATTTCCAGCAGGTTTT

>TCONS\_00063914

CCAATTCCAGAAGGCATCAGGTTTGATTCTTCTAAGTCGAAAGTTAGTTTTATGTGCTGAAAATTTGAAGAA  
AGTTTGAGTTGTAGCTGAACTTCGACTCGATCATCTGAGTTAATTGATTTGAATGAATTCGGCTCGCGTTGCTT  
ACTACTTTGTTTCTGAATGTTGAGCTAAAATTGATCTTGGTATTCCTTGCTGTTGGATTGATAGTGTCTATTGC

TATTGAAGTCTAATTCCTTGCTGCATCAGTTGGATTAACCTTGTGATCTTTGAGAAAATGTATTCATTCTGTCCA  
AAACTGTGAACTTGTAATAAACTGAATTCACCTTTGTTTTACTGTAAAGAAATGAATCTCTAGAAGGAATGT  
GAGCTCAGTTCTTAAGCTGGTTGCCATCCTCATATTGAACTGAGATATTGTTACTGCTGATTTGTGAGTGAGAA  
TTGCTAGACTTGCTGGAGTTCAAT

>TCONS\_00063939

GATCTGGTACTACAGGCAAATGGCGTGAAGTGGCAGAATTGCAGCCTTGATACAAAGTCGCAGCTTGAGAGC  
CCAATCCATACACACGTCTTTTCTTCTCTCCGCCGACAACATCCAAGTATAGGCGATTTATATCGGCATTTTGA  
ACTTCTTGTGAATCATCGGATGAGCTCGGAATAGCAGCAGCCATCGCAACTTCCATTTTATCACCAACAGTCT  
TAGACTTGGTATCCACAAAGTTCCC

>TCONS\_00064094

TCAGTAATTGCTTTGAGCTTTCTTAATCATCGCTTATTCATCCAGAATGTTATTTGTTTCAGTGTTCACTAAATGA  
ACAATGTAACTTATACAAGAATTTGTCACATAATGTATCAGTCTGTTTCAACATTATTGCTTAACAAATTATA  
ATACTGACTTATCTTTCAAAATGACATCATTGTACCCAAATATTCTTACAAAACAAGCGATCAACTGTTCTGT  
ATCACTTCTTCAGCAGGAAGCTCTACATCTGCCTCTTTCTTCAAAGATGTAACATCTTTATCCGCAATCCCGCA  
AGGCACAATATGCTTAAAGTAGTTTAAATCAGGATCCATGTTGAATGCTAATCCATGAGACGTAATCCCGA  
TGAAATTCTAACTCCAATTGCACCAATCTTTCTGTCTCGACCCAAACCCCTGTTTCGCATCTTTTTCCAACCTG  
TGCTTTCACACCATATATAGATGCTAATTCAATCATGGTTAGCTCAAGCTTCTCCACATATTTTCGAGCCCCCA  
AACCAATATCTCTCAATGAAACAATCGGATACAAGATCGCCTGGTGAGGACCATGAAAAGTAATGTCACCTC  
CTCTTTGTGTATAGTGAAGTTCAGCCCCACGGCTTTGAGCTCCGAATCAGGTATGAGTAGATTGTGAACTGTT  
TGCTTTTGCCAAGAGTATAAGTAGGTGGATGTTGAAGAGATAATAGGGTATCAGTAATTTTAAGAGCTTTTC  
TATCAGATGCTAGCTTCTCTTGAGCTTCAGTGCCTCCAAGTAATTGACGGTGCCCATTTTCCAAACCTCAAGG  
CTTCGCCTCATTCTTCTGTAATCAGAGGAGTGACACACCAAAAAGCCTATTACCCGGTCAATTCTCTGTTCAAAT  
TTCTGTACGCGCCGGTGAGAGCAGCTAGTCCAACCCACCCACCTCTCTCCCTCTCTCTATATCTCGTTGGCTA  
TGGCATTTGGAGAACTTTATGTTAT

>TCONS\_00064214

CAAACGTGCATTAAGTCAATAGACAACAAATTTAAAAGCGGGAACATTTCACTCCTTGGTGGTCTTGTTTATG  
AGTGATTTGTGAATGTGAGGGATAACACCACCACCAGCAATGGTCCCTTTAATAAGCGTGTCGAGTTCCTCAT  
CTCCACGAATGGCAAGCTGCAAGTGCCTTGGTGTGATCCTCTTCACTTTGAGATCCTTGCTTGCAATTACCAGCC  
AATTCAAGAACCTCTGCTGTCAGGTATTCCAGAATTGCAGCAGAGTAAACAGCTGCCGTCGCTCCTACCCTTC  
CATGGGCTGAGGTTCTTGACTTGAGTTGTGCGGTGAATTCTACCCACTGGAACTGGAGACCAGCACGTGATGA  
ACGAGAAACAGGCCTTTTCTTGCTTTCTCTTTGTTGGCTGCTGCAGCTGCTGCCGCCGCTGTTGTCTTTCCTGC  
TAGCAGTCCTTTGCCTCCTTTCCCCGCCATCTTCAAATCTTAATTAATTATCACATAAATTAATAAGGCAAGA  
AAGGAAAAGGTCAGTATTTTGTTTTTG

>TCONS\_00064230

GCTTGAAGCAAGTGGAATGCTCAAGGGAATTTCTTTTCAATGGCAGTAGGAAAGCCTACTTGAGTAGTGC  
GTTGGCTCTACACTTGGACAGCTTCATCGAGACTTCACATACGTAGATTGCCATGTTTATATCCGAACGAAAA  
CACCTTACTGATGTTTTTGTTCAGACTGAAATCTTTAACTATAAGAAGGGAATCGATTAAAGCCAGATTAC  
CGCCTATGGTACACTAAGAATTTAATACTCAATGAGAAAAGGTGTTAACTAAATAGAAAAATCCCGATTTTCG  
ATCATCTTTGACGCCTCCTCCGTATCGAGATTCAGTCGCACCATACCTG

>TCONS\_00064231

GCTTGAAGCAAGTGGAATGCTCAAGGGAATTTCTTTTCAATGGCAGTAGGAAAGCCTACTTGAGTAGTGC  
GTTGGCTCTACACTTGGACAGCTTCATCGAGACTTCACATACGTAGATTGCCATGTTTATATCCGAACGAAAA



CACCTTAAAGATGTTTTGTTTCCAGAATGAAATCTTTAACTATAGTAGGGAATCGATTAAAGCCAGTTATCG  
 CCTATGGTACACTAAGAATTTAATACTCAATGAGAAAAGGTGTTAACTAAATAGAAAAATACCGATTTTCGAT  
 CATCTTTGACGCCTCCTCCGTGCCGAGATTCAGTCGCACCATATCTGGTTCTTGGAATGACATCTGTCTTTTG  
 CACCTCATCCGCCGTCTCCAATAAAATAAAAACTTGTCTAAAGACTAGATGTTGTAGGGTACGTCTTAAAAGT  
 GTCCTCCGCTACGTCTGCCTTACGTCAAGAGGTGGTCGTGGCTTCGCTCCTGCGACCGAACCGAATCTGTG  
 TAATCAAGTTTCATGCTCGAGCTCTAGGAGAATGGTGATCCCTTGAAAAAGGAAAAATCGACAAGGAAGATAT  
 GGAGTCAACGGCAAAATTACTCTTCATTCGTTGTATGGACCTCAACCGGCTCTACCTAAGAACATAACGAAA  
 GAAATATATATATATATATATATATATATAAGATGATCCATGATTCACGGCACTCTGAAGAATCAT  
 GACAGATTTGTTCTGGGAGGAAAAAAGAAGGATTCGAGGTTGGTTGAAATGCCCTTCTGTGGCTGATAATG  
 GGGAGCGACAGCTGGACAGATCGATTTAGATATGGAGGTCTTATCCGGTGGATGGACGTCTCATTTGATCCTA  
 GTTTTGTCAATGATGGAGATTCAGAGATAGGGACAGGTACTAGGGG

>TCONS\_00064243

TTATCCTATTCTGTTTTTTGTTACTTGGCAGACTTTGGGTTTCCTTCAACACTTCCACATACGGATGGCTCATCT  
 GAAGGAGTTTCTTCTGAAACGAGAGCCCGTCCAAATGTAAAACCTGTCTGGATACGCCCTGCTATTCTAGATT  
 CATAAATGTTTGAGGAGAAGCAGCCACTTTGGAATTATCTTTGGTATATCTAAGTAATAGATTGCATGCTGAT  
 GATATATCTGAAGTCTGAACAAAGTGGAGAATGGAGACTCGTAATCCTGAAGTGTTATCAGGTCTTGGTGCA  
 CAAGGTAGCATACTGTCTGAGGAGAAATTTTACGTACTTAATTTTACGATTTATATACATGTAGGCCATATGTTT  
 TCCCATGTCTCATAAATAGTCAAAATCATAGTTGGCATCCCTTTTCTTATTAATGTATGTAAAATCTTTTGATT  
 CTCCTATGTATAATTAAGTCGCTCTTTAGAACCAAACAAAGCTATGCTTTTGATTCTCCTACTGTAGAATTCTC  
 GAATCTGAAAAGCTGTTTGGAGCAAACCTTTGCTATACTTTTAGAACATAGTTATGCTTGATCAAATTGTCAGT  
 ACGATTACAGATGAGAATGGTGACTGAACATCACTACAATGTTTTATGCATTTTACCTCTGCC

>TCONS\_00064248

TGGTGGGACTGAATCTCGATACGGAGGAGGCGTCAAAGATGATCGAAATCGGGATTTTTCTATTTAGTTAACA  
 CCTTTTCTCATTGAGTATTAAATCTTAGTGTAACCATAGGCGGTAATCTGGCTTTAATCGATTCCCTTCTTATAG  
 TTAAAGATTTTCACTCTGGAAACAAAAACATCAGTAAGGTGTTTTCGTTCCGATATAAACATGGCAATCTACGT  
 ATGTGAAGTCTCGATGAAGCTGTCCAAGTGTAGAGCCAACGCACTACTCAAGTAGGCTTTCCTACTGCCATTG  
 AAAAAGAAATTCCTTGAGCATTTCCACTTGCTTCAAGC

>TCONS\_00064252

TTATCCTATTCTGTTTTTTGTTACTTGGCAGACTTTGGGTTTCCTTCAACACTTCCACATACGGATGGCTCATCT  
 GAAGGAGTTTCTTCTGAAACGAGAGCCCGTCCAAATGTAAAACCTGTCTGGATACGCCCTGCTATTCTAGATT  
 CATAAATGTTTGAGGAGAAGCAGCCACTTTGGAATTATCTTTGGTATATCTAAGTAATAGATTGCATGCTGAT  
 GATATATCTGAAGTCTGAACAAAGTGGAGAATGGAGACTCGTAATCCTGAAGTGTTATCAGGTCTTGGTGCA  
 CAAGGCAATTCCACCTTTATTGCTAAAGCTATTGGCTGAAGCTTTGAGGTATGAAATCCCTTTGTTTATATATG  
 TAGAATTCATGTTTCCCTCTGTCGTTCTCGTTTTAGACTCTAAATACTTTCTAACTGTCATGTTTGGTGCTAATA  
 ATCTTAACCTCAATCTTTTTCTTGTTAATGCTGCTAGTCCTTGCCTCTGTCAACAATAAAGACATGCCGCCGC  
 CTCATTAGGATAAAACACTTCATGAACCTTGTTGTTGCTCTTAGTATGGGAATAATCTAAGCTGCTACTTCATT  
 ATGATAGAACTCTTAAATGAGCCTTGTTCTAAGTATGGGAATAATCTAGGTTACTTTCAGTAATGCACACCTT  
 ATGGGACCTTATTTACCTCCTTCTTAGACTCGTAATGAGTATGCATCTGGAAGGCTAGCTGAAGTGCTAGAA  
 ATAAATGTTCA

>TCONS\_00064258

GGAAGAACGATGACATTACCAATACAACATAGTTTCTAGTCGCGATCAGCATCTTCCAATTCTTCATCCTCAG  
 GTACACCACGAAGATAGAGAACATTATTACATCTAATCAGGATCTCTCCGAGAGAACCAGTGCATTGTCCAT

CAATGTATTCTTCTGCGTTTGCAAGCTGCAAGTTCATGTATGAATCCACGGAGACCAAATACCCTTTGTACTCC  
ATTCCCCATTTAAGCTTTACCATCACAGGCTTTCCCGTCAAATTGTTCAAATAAGGCTTGGGATTAAGTGGTAC  
TGACATGGCTTCGGTTGATTTGCTGGTGAGACGGCTAAGCTGCTACTGAAGCTCG

>TCONS\_00064292

TGAAAATGAGAACTTACTCATGAGTAAAGACATCTGCAACCAGAATAGCACAGATGCAAGCATAATCATTG  
ATTACTTTCTAGGATGAAAATTGGGAAAGATAGAAGCTTGATCAAGAAGCACTTCATCAGCTTGTTCTTCAAG  
CCAGGAAATGAAAACCTTTATGAACAATCATCCTAACCAGATCAACTTCCACAAATCTGGTTGGAAATACAAA  
AAGATATCACCAACCAATTTTCAAGAGGATATAAAAAGATGTTGTACATTATACAAAATATGTATATTCAAATGA  
GTAGTGGGAAGAGGCAAACCTGAATAAACTTGAGAGAATACAAAAAGATATCTCATTCAAATGCCTTTCTTTA  
ATCCATCTTTATTGCATAATCAAAAGCACATTAAAACTTTAAGATTGAGAATTC

>TCONS\_00064407

GGTACTTCTAATGTCAAGTTACCTTCTAACATCTCAATAACTTTGCTCATTGATGGCCTTACTGCTGGATCGGT  
TTGTATGCACCACAGACCTACTAATATCATCTTCCTTGCAGTTTCTTCTTCTTTGTTTATAATCCCTTGTAAGT  
TTCAGCTCATCGTCTAGCTGAACGTGCTGATACGCCCAGTAAGGAAAATATATCTCACTTGTATGGCTTACTTC  
TTCTTTTACATTTTTTCTTCTCCGACCATTTCTAGAACCATCATTCCATAACTATAGACATCAGACTTGTGTGA  
GACTCCTCCAAAACCTCCTACTGATTACTTCAGGAGCAATATAACCAATCGTCCCTCGTGCTCCTAACATGGAT  
ACAATGCTTTCTTTCTTGTGCAGAGTTTAGCCAAACCAAAATCTGATATTTTAGGACAGAATTCCTCATCAA  
GGAGTATGTTATGAGGCTTTATGTGCAAAATGCAAAATCTTGTGTGTCATCCCCGGTGAAGATACTCCAATCC  
TTTAGCAATTCCAACCTTTGTAGACCCCTCCATAACCTCCTTCACCAAGCTTATCGTTGAATCCGTGTGTCATTTT  
CTTGATTTCCCTATAGCTGTATCTTTGTTGCCAGTGATCCATATTGCTTAAGTAAGGCCTCTAGACTCTGATC  
TTCTGTTTTGCCGTTGATTAGTCTTATGCACTTCTTGAATGTTTTTCTATATTGTGTGTACATTATACCAAAGAA  
GATTAACATCCCAATTCCAGCAACTGAAATTCCTATTGACAGAG

>TCONS\_00064446

TCTGATCTCTAATTATAAAGACAATTATGTAGATTTATCTACGGAAACAAGCTGATTGATACAACAATTTGAA  
ACAAGGACAATTAAGAGATTGTTTAACACGTACAATATTATATCTTCTCACAAGAGATAGCTAGAAATTTAA  
TACTAAATATCAACAGATGAAGAGGATGGAAGGGTCGCAGCAACACTCATCAATCAGGAAACAGCAACACA  
GAGCTGCCAGACATCCCTCAAGAAAGCCAGGTTCCCTTCTGGGGGGAGGAGCTGTATAATATTGTGGTGGCG  
GCATCACTGGAGGACCTTGATAATATCCTTGAGCAGGGTAGGGATACGCGTACTTTGGTGGCTCACTCATCCT  
CG

>TCONS\_00064508

AGCTAATTTAAGATCATCTCGGGAACCATTTGACTAGCAAATTCCGCCAAACCTACAACCTTTTATTGACAGT  
TTATAAGTTACATTGGAAAAAACAATAAAAACATAAGCTGTGTGCATCACTTGGACAACCTGCTGAGAAACAT  
CCTTCTTTTCTTCTTGTGTTTGGTCCTGAAATAGCTGCTGTTGCTGCAGCAGTCATGGCAGCAGCAGCTGCACCT  
AATTTTACACCTCCTGCAGCTTTAACAGCACCACCAATTTTGGCAAAGGCAGCTATTCTCCTACAAGAATGG  
CTCTCAATGCAACTGTTGGTTTTATACTCATATTTGTCTACGATTAGATTTGCCTGAGGAAGTGATACGGGG

>TCONS\_00064512

TTTTTCCCGTATCACTTCCTCAGGCGAAATCTAATCGTAGACAAATATGAGTATAAAACCAACAGTTGCATT  
GAGAGCCATTCTTGTAAGGAGGAATAGCTGCCTTTGCAAAAATTGGTGGTGTGTTAAAGCTGCAGGAGGTGT  
AAAATTAGGTGCAGCTGCTGCTGCCATGACTGCTGCAGCAACAGCAGCTATTTAGGACCAAAAACAAGAAG  
AAAAGAAGGATGTTTCTCAGCAGTTGTCCAAGTGATGCACACAGCTTATGTTTTATTTGTTTTTCCAATGTAA  
CTTATAAACTGTCAATAAAAAGTTGTAGGTTTGGCGGAATTTGCTAGTCAAATGGTTTCCCGAGATGATCTTAA  
ATTAGCTCAGATATATGGGTCCTTACATTGCGGGACTCGCTAGCTCTGTACTAATGGAAGAAGGAACTTGTTG

AAGTGAAGCATTGTGTCATCACTTAAATTCTCTGGTAGATGCAGATTTTCGCTCTCCAGAATCTGAGGTATGTA  
ATTGCTGTGTACT

>TCONS\_00064567

ATTGTACTACTCTTGTGCGTTATAACTAGTGCTGTGTGTTCTTCGAGAATATTCATGCTTTTGACTTTGTGTCAT  
CCTCTATCTTCTGGTATTACCGTTAAGCTCGGTTTGCCTTATGATCTGCCTATAGTTTAAAGAAATAAATAAGC  
AGGGAACCTGTTCTGTGTGTGTCGTTACTTTATTCTTTTCCATTTTCCTCCAAAGTATGGACCGCAGGTTTCGTTA  
GTTTTTGGGTATTATCGTATATGCTTACTGATTCTTCTGCCATTATATTTGAAGCGCGTCTGAGAATGTGTCAA  
CATTCTAATCTTTTTGATGCAGTATGGACAGCAGATGATGATTGGTCACCCCTCGGCAAGTTGTCTATATGCCGA  
ATTACCCCCCTGAAATGCCGTTTAAGGGAAGAGAGTATTAACCAGTTTGCTAACAATATCGCGTGGTGGGTTG  
ACCCAATTTGCTGATATAGAAAATAATTTCTGACGCTAGAGGTTGTGGATCATTTATTGGTGAACGAGGTTCA  
GCTGGTTGATCTCCAAATGGTTTTGATTAGAGCTCTTCCTTGTAGTGGAATTTCACTGATTCGAATTGTCATTAT  
CACAGATTTCTACTTATTGGTGGAATAAACCACAAAAAGATGTGAAGAAGAGTCGAGTTACACTTAGTGT

>TCONS\_00064568

ATTGTACTACTCTTGTGCGTTATAACTAGTGCTGTGTGTTCTTCGAGAATATTCATGCTTTTGACTTTGTGTCAT  
CCTCTATCTTCTGGTATTACCGTTAAGCTCGGTTTGCCTTATGATCTGCCTATAGTTTAAAGAAATAAATAAGC  
AGGGAACCTGTTCTGTGTGTGTCGTTACTTTATTCTTTTCCATTTTCCTCCAAAGTATGGACCGCAGGTTTCGTTA  
GTTTTTGGGTATTATCGTATATGCTTACTGATTCTTCTGCCATTATATTTGAAGCGCGTCTGAGAATGTGTCAA  
CATTCTAATCTTTTTGATGCAGTATGGACAGCAGATGATGATTGGTCACCCCTCGGCAAGTTGTCTATATGCCGA  
ATTACCCCCCTGAAATGCCGTTTAAGGGAAGAGAGTATTAACCAGTTTGCTAACAATATCGCGTGGTGGGTTG  
ACCCAATTTGCTGATATAGAAAATAATTTCTGACGCTAGAGGTTGTGGATCATTTATTGGTGAACGAGGTTCA  
GCTGGTTGATCTCCAAATGGTTTTGATTAGAGCTCTTCCTTGTAGTGGAATTTCACTGATTCGAATTGTCATTAT  
CACAGATTTGTAAGCTTTCAAATTTACAGTCTCTCATGGAGTTTATTTACTGAGCTACTTATTGGTGGAATAA  
AAACCACAAAAAGATGTGAAGAAGAGTCGAGTTACACTTAGTGT

>TCONS\_00064760

ACTATCTGGTTGGGAAGAGGTCCAAATTGTTGAAAGCCTACAGATTTGGCATTCTTTGTGCAATGTTCCAGA  
TCAGGTATCAGAAGGCTGATTTTCTAAGCTTCCTCAGAAAAGCAGTCGATATGAAAACCTCTGAGTAGAATCC  
ACACTTAGTCTCTTTTGAGACAGACTTTGACAAGAATTTTCCAGCACAAAAATTCCGGTAAGGGCGATAC  
ACAGGAGGCAGTAGCATTGCAGACTCTTTGTCCATTGATAGTAGCCGGCTACACTTGCTGCATACTTTTGAGA  
ACAAAGTTTGGTAGCTGCAGACCCAGAGAAGCAAAGAAAACAAGGCTGTCTCGATATCGACACCTGTAAAA  
TGCTGTAAAGCCATAGCAGCATGCTCCGTGATGTGCCTAAATACATGATGAACTGAAAATCCCCTCGCATGT  
ACATAGCTACCACCCTCGTCTGGCGAGAAGAACGCTAGAGCATCAGGATCCAATGAACCAGCAGGGGAAAC  
TGATACTACGGCTCTAAAAACAGAAGGTATCAACAATTCGATTATAGCAACCTTGTCTGGAACAACATCATC  
AGATGATCCTTGCTTAACGTTGTCGTGCTTTGGAAAGTATTATCTTTGATAATTCAATAGAAATTTCACTGGT  
CGAAGAGGGCAATGAGGTAGACCGCTTTAACCAATCCAAACGCTGGTAGGAGAAAGTTGTTACATTTGGAA  
CCTCCATTTTCAGATGTGTCAGAACTTCAGACACTGTTTTCGGTTACAAAGTTTCTTCTTGATCACTTGATGGA  
GGACCACAAAGTTTCTTTGTAGCACCCCTCCTCACCAGCATTGCTATCAAGGTGGGGGAAAAATCGTCGTTTCT  
GATCATTAAGGCCTTCAGGGCTAACCTAGTCCTATCAACTGCAGATGCACCAGCCTGACCAGCAAGTTGTCT  
CTTCCATGCATATGCAACAACAGCACCATCGGGACAAACCAAGGGCATGTGGAGGCCCCACGAATTACTTCG  
TAATCGAAGGGAATCATTGAGGACACCAGAATCTTCCAACCTGCCTTCCAACAGAGCGAAGGTCTTGTAGGTG  
TTGTCTCATAGAAGCTTCTTCTTTGAGGATAAGATGCAAAGGTTTGAAGAGTGTTGTGGCTGAGCCGCCACA  
AATAGGGCTTCCAGAAGCCGATCTGCGCCAAGTCTGATATCAGCTATGAGTCTACTCGCTGCCCCAGCCGCT  
CCAGTGCCATTGCCACCTGCTTTGGCGGCGCATCTCCATTGCGCTGGCTGGACTCTGCCCCTGAAGCTCCTGGT

CCCGCCGCCGTGTGGGGTTGTGGTGTGGTTGCTGCATTTTTGTATGTCTGAACCTTGGGAGGGTTTAATGTTG  
GCGATTATAGCCCCCGTGGATGAGGTGTTCTTATGAATATCCCCGTGTACATGTAGAGAATGCTTCTTTATCAA  
AG

>TCONS\_00064763

GGAAAGTTTGATGGCTTTTTTATTTTCTTTAAGCATTGGACACCAAGAAGACATGCAAATTATAACCTATTAGT  
TTGTTTCTACTTGGTATCCTACATAATTGTGGTGATTACAGTCCCCTACTTTCTCCTCCCAATGAGAATGTAGGC  
TACGATAGCCCTACATCTTGGACACCAAGAAGACATGCAAACGATAACCTATTAGTTTGTCTCCTTGGTAT  
CCTACATCTTGTGGTGATTCATAGTCCCCTACTTTCTCCTCCTGATGAGAATGTAGGCTACGATAACCCTACAT  
CTCTATTTAGTTACTTTTACAGAAGGTAATAATCGTAAACTATGATCATTTAAACTTGTGTCTCTCTTTTGGTC  
CCTACCCAGAGTGCCGTGCACATTATCTACCCCTGTCATGTTGCTTATGAGTGGCGGTTAAGTGGATGGAC  
AACACATCTAGGATTTGTTTATTCGAGTGCTGAGGTGGAAATTAGGAACTTTTTGATAGACTAAAACTATAA  
GCCAACTTGTACTAGATGGGAAGAGTTCAGTTGTTCCCTATTGTCATATCCTTGCTGGGTGTTGTTTTCTGAAT  
GTTTCGTTTGCTTAGAATAGCTTGTGGATTCTCTTTATTCTGTTTAGAGGCGAATTTATTTGTATTTGGTTACCC

>TCONS\_00064851

AGCTGGGTAGACCGTCGTGAGACAGGTTAGTTTTACCCTACTGATGACAGTGTGCAATAGTAATTCAACCT  
AGTACGAGAGGAACCGTTGATTCCGACAATTGGTCATCGCGCTTGGTTGAAAAGCCAGTGGCGCGAAGCTAC  
CGTGCGCTGGATTATGACTGAACGCCTCTAAGTCAGAATCCGGGCTAGAAGCGACGCATGCGCCCGCCGTCC  
GCTTGCCGACCCGAGTAGGGGCCTCTGGCCCCCAAGGGCACGTGTCGTTGGCTAAGTCATCGCGGCGGAAG  
AGCCGCGGTGGCCGCCTTGAAGTACAATTTCCATCGAGCGGCGGGTAGAATCCTTTGCAGACGTCTTAAATA  
CGCGACGGGGTATTGTAAGTGGCAGAGTGGCCTTGCTGCCACGATCCACTGAGATTCAGCCCTTTGTCGC

>TCONS\_00064905

CTTGTACCCTATGACTCGAATTGATGGATTATCTTGTGTTATTGTTAGATTAAACAAAATACTACAGGATGACAT  
AGGAGATGGTGTGTTGAGGCTCGGGTGCCATAGTTGTAGCTTGAGAAAGATGAGGAGAGCCAAAATTGCAGC  
AACCGCAGCTATGACAAAGAGTCCCCAGAAGCTAGCTAGGCCAAGACTGTTGGAGGAAAGTGAAGTGCTAG  
AATCTGAACAAGTAGATTCCCCAAACCACGCTTTCTCTATTTGTACCATCTTTTCACTTTCTGTCACACTTAAA  
ACTGCTCTTGAAACATCAGGTACTAGCGGAGATCCCATTTGGGAAGACCTAGATGAAAATCACAAGAATGATG  
AAATC

>TCONS\_00064911

CTTTGAGAAAGAATCAGACCCCGCGGTTACGAATGACTTCCATGCCTAGGAATAAATGCATAAGAGTTGAA  
GAACTTGGCTATACCTGCACAGCTGAGGTTTGCATTGCATCAGAATTGCTTGTTCCCTGTTGTCCTGCCTTCA  
TTTGTTGAAGAAGTTGCAAAAGTTGAGCCACATTATCTTGGGTAAGAATCTGATTTTCTGCTGCATTAGCTCCT  
GTATACTCCAT

>TCONS\_00065200

CACTCCAAATTTGCAATCCTGCTTATTTTACTCGCCATCTCAAAGGGCTTTACACCTTTCAATAACGGTAGCAA  
AGCCAAAACAATACCCAACAACATCTCAATCCAAACAGCAAAAACGTCACAACTGATAAGAGATCGAATC  
ATGTCTAGTGTCTGCAAAACCCTAGCCGATGAAGAAACAAATGCGCTGGAAATGGACAGAATCAAAAGCAA  
AAGTGAA

>TCONS\_00065210

GAGAGAAAGATATGAAGAGTACAAAAAGGACATGACAATGGCCATGAACTCTGGCTGTGAACTGAAAAAA  
TTCCGCTTGCAATGAAGTTATAAAGAAGTACAAGAAGTTGCTCTATGGTGCTCCAGAGTTTGAACAAAGTGTG  
AGAAAGACCGAAGACATCTTTAACGAGGGCCCTTGCAATTATATCATGTAACATATGATAATGCCAGGATCACA  
TACGGCATCGAAAAATGTGGGTTTGCCTGGAAAGTAGCTGGTTCTGCTCTCTGCAGGATCCACGCCATGTATC

AGAAGGAAAATGCCTTTCCTATTTTGCCATCTATTTTACAGGACATATTGTAGAGCTGTTGTAACCTCTGTAGGA  
TACTAACATTGAAGTTAACAAATACTAGCATTGTTGCTAGTGTATTATGGAATTTCAAATTGTACAGGCTCGTT  
AGCGATCGGGCATTTCGAAATGTGTAATATCATCAAGCTGCTTCTAATCTATATGTTAGATAGTTATGTATAA  
ATTCTCCTATTCCCATATGTAGGAGTAGAATATG

>TCONS\_00065272

GGTTTCACAGACATGGTATAAGAAAATAATCTGTGAGGAAAATAGAGAGTGAGCGATATTGTAGTGAGGTG  
GGAATATCAAAAGAGGGGTTATTTCTTTTGAGTGTTGTAGTGGTCTTTGGAGTATTTTACTCGGACCTACAAAG  
TGTAATAATCCTTACTATAGTGATATCAGTTGCTCCTCTCGGGGCCGTGGTTTTTTCCCTTATTCAAAGGGTTT  
TCCACGTAAAAATCTTGGTGTCATTGCTACTCTTTTATTCTTGTTAATTACTGTATCTCGGTGCTACGTTATTATT  
CCGCTTTTAGTACCGTGAATATTATTT

>TCONS\_00065288

TAATTAACAAGAATAAAAGAGTAGCAATGACACCAAGATTTTACGTGGAAAACCCTTTTGAATAAGGGAA  
AAAACCACGGCCCCGAGAGGAGCAACTGATATCACTATAGTAAGGAATTTTACACTTTGTAGGTCCGAGTAA  
AATACTCCAAAGACCACTACAACACTCAAAAGAAATAACCCCTCTTTTGATATTCCACCTCACTACAATATC  
GCTCACTCTCTATTTTCTCTACAGATTATTTTCTTATACCATGTCTGTGAAACCTCACTCT

>TCONS\_00065289

GAGATACAGTAATTAACAAGAATAAAAGAGTAGCAATGACACCAAGATTTTACGTGGAAAACCCTTTTGAA  
TAAGGGAAAAAACCACGGCCCCGAGAGGAGCAACTGATATCACTATAGTAAGGAATTTTACACTTTGTAGGT  
CCGAGTAAATACTCCAAAGACCACTACAACACTCAAAAGAAATAACCCCTCTTTTGATATTCCACCTCACT  
ACAATATCGCTCACTCTCTATTTTCTCTACAGATTATTTTCTTATACCATGTCTGTGAAACCTCACTCT

>TCONS\_00065387

AGAAGATAGGAGGACGGCTGAAACTGGATGTCTATATTGGCCAAATAGAAGATTGAATTTGCAGAAGATGT  
GGTTGTAGCTTAACCTGGTACGAACCTGCATCAGATTTTCAAACCAAGTGGAGAATTTGGCAACCAGAATGGT  
GGAGAACAGTGAGCACCGAAGAGCAAAAAGAATTTCGCACCTTCAAATGGGGAAATGTTTAGATTGAGCAATG  
ATGGAGGCCTACTGAGTGCGACACTGGAGGAACTTCAAGAATTTGGGGATGATATAAAGAGTCTCCGTGACT  
AAACGGTGGCTTAATTTACTGATGCTGTAAAGAAGTGCTTTTGTAGGTGCTTAGTAATGTAAAAAATTTTCTAT  
GTGAGATATTTTTTTGTTTTAAAATGCTTAAAGTTTGAGAGATAATAGTAACCACTTCACTAGGATATGAGCA  
AGGCAAGAAGAAAAGATTGGTGATATCAAAATCCGTATCAGTGATGACCTGTCAATACTTAGATGGTTTGCA  
TGTTTGTGACAGACTCAATGAAAAGGCATAAATTTTAGCTTCTGCTCTTATGGGGCCACAATCT

>TCONS\_00065396

GTCACCTGTAGTTATTTATCATTCAATGAATGACTGATAAAGGATCCATTGATATTAATCTAATCCAATTAGAA  
TGCTTGGTACTTTGTAGTTGTACATAAGCAAAGTATTGAAAATCATATTTACTCTTTCTATTTCTAACCATCGG  
GGAGATTCATCCTATATTATTCCTAGATTATTCCAGCAAATAGCAGAATCGTGGCTAGGGAACTATACTAGCG  
ACCTACCCAATTTATTGTAGAAATTTTCGCGATCAATGATTGGACCATGCAAACCTAGAAATGCTTTTTCTTGGC  
TAAAGAAACAGATTACTCGATCTATTTCCGTATTGCTCATGATATATATCTTAACTCGGACATCCATTTCAAGT  
GCATATCCCATTTTTGCACAGCAGGGTTATGAAAATCCACGAGAAGCGACTGGGCGTATTGTATGTGCCAATT  
GCCATTTAGCTAATAAGCCCGTGGAGATTGAGGTTCCACAAGCGGTACTTCCTGT

>TCONS\_00065398

CACTTGTAGTTATTTATCATTCAATGAATGACTGATAAAGGATCCATTGATATTAATCTAATCCAATTAGAATG  
CTTGGTACTTTGTAGTTGTACATAAGCAAAGTATTGAAAATCATATTTACTCTTTCTATTTCTAACCATCGGGG  
AGATTCATCCTATATTATTCCTAGATTATTCCAGCAAATAGCAGAATCGTGGCTAGGGAACTATACTAGCGAC  
CTACCCAATTTATTGTAGAAATTTTCGCGATCAATGATTGGACCATGCAAACCTAGAAATGCTTTTTCTTGGCTA

AAGAAACAGATTATCGATCTATTTCCGTATTGCTCATGATATATATCTTAACTCGGACATCCATTTCAAGTGCA  
TATCCCATTTTTGACAGCAGGGTTATGAAAATCCACGAGAAGCGACTGGGCGTATTGTATGTGCCAATTGCC  
ATTTAGCTAATAAGCCCGTGGAGATTGAGGTTCCACAAGCGGTACTTCCTGT

>TCONS\_00065410

GGAACCTCAATCTCCACGGGCTTATTAGCTAAATGGCAATTGGCACATACAATACGCCCAGTCGCTTCTCGTG  
GATTTTCATAACCCTGCTGTGCAAAAATGGGATATGCACTTGAAATGGATGTCCGAGTTAAGATATATATCAT  
GAGCAATACGGAAATAGATCGAGTAATCTGTTTCTTTAGCCAAGAAAAAGCATTTCTAGTTTGCATGGTCCAA  
TCATTGATCGCGAAAATTTCTACAATAAATTGGGTAGGTGCTAGTATAGTTCCCTAGCCACGATTCTGCTATT  
TGCTGGAATAATCTAGGAATAATATAGGATGAATCTCCCCGATGGTTAGAAATAGAAAGAGTAAATATGATT  
TTCAATACTTTGCTTATGTACAACCTACAAAGTACCAAGCATTCTAATTGGATTAGATTAATATCAATGGATCCT  
TTATCAGTCATTCATTGAATGATAAATAACTACAAGTGACAGAGACAGACGATTTAAAT

>TCONS\_00065415

GCAGAGGTCCAACATGTCAAGATGTACAAGCAGGTCTTCGAGGAGGTAGTTGTTGATGAGCTGATCTTTGCA  
ACTTGGGACGCAATGTCTCAATAACAACCTGCTGATTTTTTATCAACTCCTGCACCTTGCTTGCATAGAGCCCA  
GTCTGCGGAATCAAAGAAGGCACGTTTCATGGTCCTTTGAAATCAAAGGCTTCTTCTTTGGCATAAGTCCTCCA  
TATTTTTTACCAGTGGCAGTAGTCTCGTGATCTTGAGAGGAGACAGAAAACCTCTTCAATACTGCTGCTATCTG  
CCATCTTAGTATGTCACAACCACCAGTCTAGCTCTCCCCTTGAAGCAGAGGAGATAACAAGACCAAGCAAAG  
GCAGAAATATGGTGAATAGGCTAA

>TCONS\_00065419

GATCTATTCAAATGACAATTGCGTGCTCAACATCTTTAAAAGAGTTGCTTAACAACATTTCAAATAATCTAAA  
ATAAGTTCACATCTGGCAGCTCTCACTCATTACATAACAGGCTTGTTATCACTTGCTTTTGGCCTCTGTTCTTGG  
GCCTCTGCTCTTCAGTTTTCTTTTGTCTGGAGGCGCCTCCTTTCTGGCTGAGGAAGGAGCGGAAAAGCGGAGA  
ATTACGTCGTAAATCATCGTCGTTGGTCAGAGGCAAATGATGGAGTACACAAAACCTAATCTCCTGTTTGC  
TC

>TCONS\_00065433

AGGAGGATAGTACTGTTGTAGTTGAGAAGCTTCTCAATGAGGTCAACATGTGTCATCAGCATTCTACGACAGC  
AATATCGAACCAAATTCAGTGCATCAAGTGCATCCCCTTCGGAGTAATCAGCTTGGAGAAGATCAAGATATT  
CATCCCATTTGTTTCCAATGACCTTGCCGCAAGTGAAACAGCGCACCGGAATGATCATCCTGCCAAAA

>TCONS\_00065451

GCCAGGTCTAGTCACTGTGAGGTAATTTAATTTACCAACTAACCGCCTATATCTTGCAGGATCGCTAAGAGGC  
TCCCCCTGTCCTGGCAGAAGTTTAGAATTCGGATCCATCGGAGTGTCAACAGGTCTACAACCTGTCATTCCTG  
TTTCTCAAGAATATCTAAGGCATACTTCCGTTGTGAGATCACAATACCTGAGCTAGACTGAGCGACCTCAAT  
ACCT

>TCONS\_00065548

AATAAATCGAAAAAAGAAAAAGGAAAAACGGGGAGATATTGGGGTCGGTTAATGTAGGTGTGAAGCAAA  
CAAAAAGCGCGTTGAATGGGAAAGCAAAAGCCAAAAGGAGGAAAAAAGAGCAATGATTAAGGGAGTGAG  
AGTATCAGGACGCTCATTTGCCAAATTTGAAAAAGCTTTATCCAAAATCCATCAGCACAGATCATGGAATC  
AACGTGAAGATAATAATACTACAATTACTCTCTTTGACGGCCGTTTTGTTTCATCGGCGCAACAGTCAGAGCTG  
GAGAAGTAGAATACGTCAGACCTCCACCTCGTAAAGCCTTTCGTTTGCCATGGGATCCAAAGCCTTCCTCTCA  
ACCTCAGCAGGAGGACCTAAAATCTTTCCATGGACATTA

>TCONS\_00065695

CCAATTTATAATGAGCATATCGCGAACGCTCTCTGCAGTCGCATAGTATGCCTTGGGAAGTTCAAACCTTCTCA  
GGAGAGAATGATGGCGTGAACCTCTGCGTGATACTTTATACTTGATAAAACAGATGTGGAGTCTGGCTGGAAA  
ACATCCAATGTGAATCCTTCATCAGAGGAAGAATCCTTCATCTTCTGTTTTTGATCACTAGCCA

>TCONS\_00065818

CCCAGATCTTTCTTACTGAGGTTCTCGATTTGTGATACAAATTCCAGATCTAAATTACAGTTGAACACCAGGAT  
AAAACACTAAACCTCTGAGAAACAATGTTGGATGCCTAAGAGTACAATAATTTACTATGTACAATCTAATTTT  
GGCAGATAGTACAACAGATGAAACTCAATTATCCATCTCACTTCAAGAAGGATTTCTCCATCACCGTTCAGC  
AGTCACCACTGTGTTGTCACCGTCTGGAGTGATGATAGCAGCAGCAGCCATGGCGTCCGAGCCATTAGGTTC  
ACCATTGCTCTGTTACCAAGATTTTGCAGTTTGATCCTGAGGTCCAGGAGTTGGAACCTTTAGAAAGATCTCTTA  
AAATTCCCTTATTGGCCCACTTGAGTCCACATGCATTACAAAGAGACCTTGGCCAGCTGGTCCACGACGCAT  
CATAGGAGTGGAATTTGAACTAATACCGCAATGCCTACATGATGTTTCCTGCTCTTCTTGACCAGAGCCTTCAT  
TCCAATCTGCAGATGACGAACCTGCTTCGTGATGATTGACTTTGAAGATGTAAACTGACCTTCTTACGCTG  
CATCCTCATCGCAACTTCTTCCGTACAGTATAACGGATCTTTTTATCGAAACACCGTTCCTTCTCTTTCCCT  
AAAACGATTCAAAGAAGCAGCTCTTTGTGGTTGATTCAATCTTCCAGGAAAGTCAGCTGAAGCCCTCTGACTT  
TGGGCTGCCACACTAACAGTAGGGATTCCAGCAGGGACTTCATATCCCCCAACAACAACAGCACCGCCTGA  
ACCTTTTCTGGAGAAACAGCATCAAAAACATAAACTTCGCCTTGAAACGACAGCGTAAGCTGATCGGAAGCT  
CCACTACCAGCAGCAACAGCAGCTTGAACCTATTTCCGTATTAGGGGGACAATACAACGCGTTGTGTGAAACG  
CCTTCCACACCATTCATCTCCATGGACTCCCCGCCGTTGTGAAGCGCGTGAGAATGACTATGAGACTGGTGGT  
GATGGTCGTAGCGAATGTTAGGGTTGTTATCCATAGACTCTCTTCTACATCGCCGCCGCCGCCGCCGCTTC  
AGTTCCAGCGGCGACGTCGTCATCGTCGTCGTCGATCTGAGTTTGCTGGTGGTGAAGTGCAGCGTTAATT  
GTCTCCCGTCCGTACATGTTAGCTCTGCGATTTGATTCTGCCATTTTCTGACGTCCTTTTATTTGTTTTTTCTAAA  
AT

>TCONS\_00065949

CAGAAATATGAAGAAACAACTATATCGAGTTCCATAATGTATACAATGAAGATTTCTGTAGCAAACAATCA  
AAACTGTTCACTTATTTAAATTTAGAGGCCAAAATTACATTCAGTACAAACAAAATGTACTTGCTGCAGACTCG  
CTAAATCTATTTAGCACCAGTAGCTCCTCTATATATCCTCAGGTCCATTGATATCCTTGTTTGCAATCACAGCA  
CCATCTGGAATTTCTAGC

>TCONS\_00065966

GCTAGAAATTCCAGATGGTGCTGTGATTGCAAACAAGGATATCAATGGACCTGAGGATATATAGAGGAGCTA  
CTGGTGCTAAATAGATTTAGCGAGTCTGCAGCAAGTACATTTTGTGTTGTAATGTAATTTGCCTCTAAAT  
TTAAATAAGTGAACAGTTTTGATTGTTTGCTACAGAAATCTTCATTGTATACATTATGGAAGTGCATATAGTTT  
GTTTCTTCATATTTCTGTAGCCATATT

>TCONS\_00066178

CTGGTAAGCAACGATATTCCATAATGTGATGCACTTGAAGAAGCGTAATATGAAGTCACTGTAAGTTGAGTA  
AACTTTGGAAGTGCACATCCTCCAAATGCTGCACTAGCTGAAGAGAACATGAGAAGTGGAGGAAGCCCTAT  
AACAAATGGAAGCCACTTTGGTCCCTTCACATGTCTCTGGACGAAAGGGATACCTGTATTGAAACCATGAATT  
GCACTGAGCAGTCCACCAAGTCCAGAGCCAGCCACAGCCGTGACATCGTGCAGTACAGGAGTAATCGCCCA  
TTCTCCACTTTTGAAGTGGGGTTCAAGAGAGAAAGACAACGAGGGGCATCGAGCAGAGCCGAGGCCAGGTTT  
GATTGTGCGATCATACTCGAGATTTCTCTCTTCAGCTTTTCTTCGTATACCTCTCGTGTTCCCATATTCC

>TCONS\_00066242

CGGTCTTAACGCCCTACTACTACTGTGCAGCCTTTCTTCGGGTTTCGTAGAGTCGGGTTTCCCGTTTACCCACA  
ACGGAAGAGCCGCCCCCACCAGGCAGGCGGCCACGGGTCATAACGCACTCTTTGCACAACAAATCCACTTTG

AAGTTGACTTATTCGCTCGGCCAATCGTCGGAATGTGTACGAGATACCATAAGGGGCCAATATCTCAATAGC  
 ACCTTTGTCTAAAGCTTCGAAGGAGACTTCATATCCGAAACGCAGGAACGATCTGACTAGAAAGTCATTCAA  
 AAGGGTCATAACGCACTCTTTGCACAACAAATCCACTTTGAAGTTGACTTATTCGCTCGGCCAATCGTCGGA  
 TGTGTACGAGATACCATAAGGGGCCAATATCTCAATAGCACCTTTGTCTAAAGCTTCGAAGGAGACTTCATAT  
 CCGAAACGCAGGAACGATCTGACTAGAAAGTCATTCAAACTTGATCGAAAAACCAACGTTTATTGAAGAA  
 GCTATAGAGTCGATTACTAATAGTACTAATTTGAAAGGCTTGTTGGAATTGATCTGCTACGGGATTAACATTA  
 TACGCAACATAAGCACCTGAAGTACTAAACGGAATAGGTATTAGTTTGGTAATGGTTGGAGCAGCAAACCTCG  
 GATTTCGGCAAGAATCTCATTTTTTGGTAGTACGAAGGGGGAATTGGCCCCAAAATTGGATGGGGGTCAAGAC  
 GCTGTCGGGCGCCGGTGGCTAACTCAAGTGTCCCGCGAACTGCGCGAAATGGTCGCCTATTACACGGCTCAC  
 TAACTCTGCCTGGGGTGTGGATACCTATTATTCGTCGGGTAAATTTGTCCGCGTATTCCAGACAATAGAAAAG  
 AGTCTTTCTTTCTCCTCTCTTGAGGAGAATTTAAAGGGAATGTGATCCCCTCTATTGTAATGAAATAATTGAAG  
 CTCATTTATTCTTTGAAGCAGAGCTTTAGCAAAACCCACTTTTGCCTCATATAAGGCCAAGGGGGAAATAAAG  
 TTGTCAAACATAGCATCGGAAAGGGTCATCTTTTCGCCCGATATTAAAGAGGTATCTTAACTCTTCTTTAATATG  
 GGAGCGTAGACATTCCGGTACAACCTGATTATCCGGTAGATCTAGCGCCATTGCCATTCATCAGGCTTGGGA  
 GAGGAGGTAGACGCTCCCCACCCGAATCCTTTCCTGCGCAGTCTACCGTTTCTAACAACAATTTCATCAAAGA  
 AAAAAAGAGAAGGAAAGCAAAAGAGACAGAGTCCAAACGCTTTCCATAATAGGTACACGACAAATGTCTGG  
 ATTATTTTTATAGTAGAAATGCCATAAAGTGCGACCCAAGATCCATGATACGAAAACCAAAAGCAAGATAA  
 GTAAGCACACGAAATCCTGATGTATTCTAACTCCAACCTCGAACAATAAATAATTATACAATAGAAAACACC  
 ATCTAAAGAGCTTTATCTCTATCATAATCGCTAAAATAGTTGAAAAAACGATCGCTGAAAATTCAAGTAAAA  
 AGGGAAGCGTTTTTTGAGAACATAGGAGAGGAATTCAAATTAGGAGAAATTCAAATGTGAA

>TCONS\_00066243

CGGTCTTAACGCCCCTACTACTGTGCAGCCTTTCCTCGGGTTCGTAGAGTCGGGTTTCCCGTTTACCCACA  
 ACGGAAGAGCCGCCCCACCAGGCAGGCGGCCACGGGTCATAACGCACTCTTTGCACAACAAATCCACTTTG  
 AAGTTGACTTATTCGCTCGGCCAATCGTCGGAATGTGTACGAGATACCATAAGGGGCCAATATCTCAATAGC  
 ACCTTTGTCTAAAGCTTCGAAGGAGACTTCATATCCGAAACGCAGGAACGATCTGACTAGAAAGTCATTCAA  
 AACTTGATCGAAAAACCAACGTTTATTGAAGAAGCTATAGAGTCGATTACTAATAGTACTAATTTGAAAGGC  
 TTGTTGGAATTGATCTGCTACGGGATTAACATTATACGCAACATAAGCACCTGAAGTACTAAACGGAATAGG  
 TATTAGTTTGGTAATGGTTGGAGCAGCAAACCTCGGATTCGGCAAGAATCTCATTTTTTGGTAGTACGAAGGGG  
 GAATTGGCCCCAAAATTGGATGGGGGTCAAGACGCTGTGCGGCGCCGGTGGCTAACTCAAGTGTCCCGCGAA  
 CTGCGCGAAATGGTCGCCTATTACACGGCTCACTAACTCTGCCTGGGGTGTGGATACCTATTATTCGTCGGGT  
 AATTTGTCCGCGTATTCCAGACAATAGAAAAGAGTCTTTCTTTCTCCTCTCTTGAGGAGAATTTAAAGGGAA  
 TGTGATCCCCTCTATTGTAATGAAATAATTGAAGCTATTTATTCTTTGAAGCAGAGCTTTAGCAAAACCCACT  
 TTTGCCTCATATAAGGCCAAGGGGGAAATAAAGTTGTCAAACATAGCATCGGAAAGGGTCATCTTTCGCCCG  
 ATATTAAAGAGGTATCTTAACTCTTCTTAATATGGGAGCGTAGACATTCCGGTACAACCTGATTATCCGGTA  
 GATCTAGCGCCATTGCCATTCATCAGGCTTGGGAGAGGAGGTAGACGCTCCCCACCCGAATCCTTTCCTGC  
 GCAGTCTACCGTTTCTAACAACAATTTCATCAAAGAAAAAGAGAAGGAAAGCAAAAGAGACAGAGTCCAA  
 ACGCTTTCCATAATAGGTACACGACAAATGTCTGGATTATTTTTATAGTAGAAATGCCATAAAGTGCGACCCA  
 AGATCCATGATACGAAAACCAAAAGCAAGATAAGTAAGCACACGAAATCCTGATGTATTCTAACTCCAAC  
 CGAACAATAAATAATTATACAATAGAAAACACCATCTAAAGAGCTTTATCTCTATCATAATCGCTAAAATAG  
 TTGAAAAAACGATCGCTGAAAATTCAAGTAAAAAGGGAAGCGTTTTTTGAGAACATAGGAGAGGAATTCAA  
 TTAGGAGAAATTCAAATGTGAA

>TCONS\_00066245



CGGTCTTAACGCCCCCTACTACTACTGTGCAGCCTTTCCTCGGGTTCGTAGAGTCGGGTTTCCCGTTTACCCACA  
 ACGGAAGAGCCGCCCCACCAGGCAGGCGGCCACGGGTCATAACGCACTCTTTGCACAACAAATCCACTTTG  
 AAGTTGACTTATTCGCTCGGCCAATCGTCGGAATGTGTACGAGATACCATAAGGGCCCAATATCTCAATAGC  
 ACCTTTGTCTAAAGCTTCGAAGGAGACTTCATATCCGAAACGCAGGAACGATCTGACTAGAAAGTCATTCAA  
 AACTTGATCGAAAAACCAACGTTTATTGAAGAAGCTATAGAGTCGATTACTAATAGTACTAATTTGAAAGGC  
 TTGGCCCAATATCTCAATAGCACCTTTGTCTAAAGCTTCGAAGGAGACTTCATATCCGAAACGCAGGAACGA  
 TCTGACTAGAAAGTCATTCAAACTTGATCGAAAAACCAACGTTTATTGAAGAAGCTATAGAGTCGATTACT  
 AATAGTACTAATTTGAAAGGCTTGTTGGAATTGATCTGCTACGGGATTAACATTATACGCAACATAAGCACCT  
 GAAGTACTAAACGGAATAGGTATTAGTTTGGTAATGGTTGGAGCAGCAAACTCGGATTCGGCAAGAATCTCA  
 TTTTTTGGTAGTACGAAGGGGGAATTGGCCCAAAAATTGGATGGGGGTCAAGACGCTGTCTGGGCGCCGGTGG  
 CTAACCTCAAGTGTCCCGCGAACTGCGCGAAATGGTCGCCTATTACACGGCTCACTAACTCTGCCTGGGGTGTG  
 GATACCTATTATTCGTCGGGTAATTTGTCCGCGTATTCCCAGACAATAGAAAAGAGTCTTTCTTTCTCCTCTCTT  
 GAGGAGAATTTAAAGGGAATGTGATCCCCCTCTATTGTAATGAAATAATTGAAGCTCATTTATTCTTTGAAGCA  
 GAGCTTTAGCAAAACCCACTTTTGCCTCATATAAGGCCAAGGGGGAAATAAAGTTGTCAAACATAGCATCGG  
 AAAGGGTCATCTTTGCCCCGATATTAAAGAGGTATCTTAACCTCTTCTTAATATGGGAGCGTAGACATTCCGG  
 TACAACCTGATTATCCGGTAGATCTAGCGCCATTTGCCATTCATCAGGCTTGGGAGAGGAGGTAGACGCTCCC  
 CCACCCGAATCCTTTCTGCGCAGTCTACCGTTTCTAACAACAATTCATCAAAGAAAAAAGAGAAGGAAAGC  
 AAAAGAGACAGAGTCCAAACGCTTTCCATAATAGGTACACGACAAATGTCTGGATTATTTTTATAGTAGAAA  
 TGCCATAAAGTGCGACCCAAGATCCATGATACGAAAACCAAAAGCAAGATAAGTAAGCACACGAAATCCTG  
 ATGTATTTCTAACTCCAACCTCGAACAATAAATAATTATACAATAGAAAACACCATCTAAAGAGCTTTATCTCT  
 ATCATAATCGCTAAAATAGTTGAAAAAACGATCGCTGAAAATTCAAGTAAAAAGGGAAGCGTTTTTGAGAA  
 CATAGGAGAGGAATTCAAATTAGGAGAAATTCAAATGTGAA

>TCONS\_00066300

CTAAAAGTACCAAAATTCTAGGGGTTTTTTCTCGATTAAAGCTCGACTACAACCTCTTTGTTCTCACTGAGCCTTA  
 ATTCTAGATTCCATTAGCGAGGATGAAAATGCAACTGATAGCTGTGGGATAAATAATTGTAAGTTTTCTTAAA  
 CTCTTTTTAATATAAAACCGTTGTGATTTTGGATGAAAATTCAGTTTTAATGTTCCTTTTTACTCGATTTAGTGAT  
 TTTTATTTTATTTTGGGAGTAATTGAGTGATGTAGTGTGATTGAATGATGATTCAAATCCATATGACACAAGC  
 A

>TCONS\_00066301

AAAATTCTAGGGGTTTTTTCTCGATTAAAGCTCGACTACAACCTCTTTGTTCTCACTGAGCCTTAATTCTAGTTGAG  
 TCGTAACTTGCAGATTCCATTAGCGAGGATGAAAATGCAACTGATAGCTGTGGGATAAATAATTGTAAGTTTT  
 CTTAAACTCTTTTTAATATAAAACCGTTGTGATTTTGGATGAAAATTCAGTTTTAATGTTCCTTTTTACTCGATT  
 AGTGATTTTTTATTTTATTTTGGGAGTAATTGAGTGATGTAGTGTGATTGAATGATGATTCAAATCCATATGAC  
 ACAAGCA

>TCONS\_00066305

CCCTCTGAAGTCCAACGGAGGACACCAAGCCCAGCCATGAGCCTTCTGATCGTCCCATTGACCCGTCCATAA  
 CCATCAAGTGATGCAGAAATCTAGCCTCAAAGACGACACGCCTCATTTGGAATCATGTGAATATGGAACATA  
 ACACGTTTTGAGCACATCCAAGTCTAATGTCGTCATCAACTCTTTGAATTGTCATCTAAATTGTCCATTCTTGT  
 GCGGGTACTTGCAGTCCCAAGTCATGATGGATATGTTAGTAAGTGGTTGGCTTTATTTAAATGTTTATAAGCT  
 ACCTTCTGAATGATGACTTTCCTAATTATTCGTTGCTATCGGTAATGCTTTAGAAAAGTAGAAAAATTTGGTTTA  
 AATACGTCCCACCTGTTGAGGGCAATATTCTAGTTAAGCTATGTCCGATTTTGTTTAGGGCAATAAATTGCTGG  
 CTAATTTGGCTGATTGTTTACCCAATTTGTCAACTTTCCTACACTAAAATGTTGTTAAGTTAGTTAAAACGTA

TAAGCAACTTGTAATGTGTAGTGACAAACGTCACCTGGGTAAGAAACAAGAATGTTTCAGCTTAATTGGCAC  
ATGTCAATTTACACTTCATAAAATGATGTATTTTGAAGTATGGAAGTTCACCAAATATGTTTTTCTA  
GTTCTGAATCTTTTGGTTATGTGTACTGATAACCTCTAA

>TCONS\_00066308

GTAAGGGTGAGAGAAGAACAAGATTGCTCCACTAGCATTGAAGAACCATCAAGTGATGCAGAAATCTAGC  
CTCAAAGACGACACGCCTCATTGGAATCATGTGAATATGGAACATAACACGTTTTGAGCACATCCAAGTCT  
AATGTCGTCATCAACTCTTTGAATTGTCATCTAAATTGTCCATTCTTGTGCGGGTACTTGCAGTCCCAAGTCA  
TGATGGATATGTTAGTAAGTGGTTGGCTTTATTTAAATGTTTATAAGCTACCTTCTGAATGATGACTTTCCTAAT  
TATTCGTTGCTATCGGTAATGCTTTAGAAAGTAGAAAAATTTGGTTTAAATACGTCCACCTGTTGAGGGCAA  
TATTCTAGTTAAGCTATGTCCGATTTTGTAGGGCAATAAATTGCTGGCTAATTTGGCTGATTTGGTTACCCA  
ATTTGTCAACTTTCCTACACTAAAATGTTGTTAAGTTAGTTAAAACGTATAAGCAACTTGTAATGTGTAGTGA  
CAAACGTCACCTGGGTAAGAAACAAGAATGTTTCAGCTTAATTGGCACATGTCAATTTACACTTCATAAAATG  
ATGTATTTTGAAGTATGGAAGTTCACCAAATATGTTTTTCTAGTTCTGAATCTTTTGGTTATGTGTAC  
TGATAACCTCTAA

>TCONS\_00066344

CCCAATTAAAAAACACCAATTGTTCCCTCCACCAATCCATGATATATGACCCTAAATTTTTGTTACTCCAACAT  
CTCTCCGAGCAATTCCACACTTCTTTTGTAAATGTCACCACCTCTTAACAGTGTTGTTAATCTGGGGTACAAGG  
TTGGATAATCCAGGCTACCAGGCATATCCATTTGGTGAAAGACACCTTGTGCACCGTTAGGAATTTCTGGCTC  
CAAAGTCACCTTTCCTTTTTTATTATAAGTGTTGTCATTGTTTTCCCTTCTTTTCCAGGATCTGCTCTTTTAGAA  
CCCTTGCTTGTCTGGGCCGCTCTACTGTAAGGCATTAGCTCTCTAGCTGCAAGACTATTTCTTGACATACTTC  
ATTAACACCTTGGATAGCAAGGTTAGCACAACCTGCCTGATCTAAGATTAGCCTCAAAAGTGACATTAACAGT  
TGCACACTGTTTTAAGGCTTCTTTAATGGCACCAACAGCGATGCTGTAACCTTCTGAGTCAGTGATCCCTCTT  
CACCCAATATTATTGCCCGTCGGCACAATCATTGTAGCGACGGACTTTAGCTTGCACATCTTCCAGTCTTTCA  
CTTATGGAATGCCTGCTCATGGCAGCATTTGGTCCAGCGTTGCAATATATACTTAGACGGAATATTGAAGACAC  
CAGACATTTGAAGAACCACAATAGCATGTCTACAAAGGTAACCTTTGTACTCAAATGAATGGCATGAGCAGT  
ATATGTCCGACCTCGGCGCATCCCACTCCACCATGAAGTCCTGATTTGCATCAAAATCTTTGACAGCATATGT  
TATAGATGTGCCGCTTCTGATTCTTTTTTTAGATGGCATGCAGCGGCTCCTAATACTTCAACTTGGAACCTTCTT  
GAATATTTTCATGAGTATATATGAGCAACATCTGTTTTTCGAAGGGCGAGGGAGACTTAAGCTCAGGCATCTCA  
TGCCATGCATCAAAATTAGCTTTGGCTTCTCTCATACCAGTCTTCAAGGATTAGCTTATGTTGTCCAATAAA  
GTCTCTAAGAGACGTTTCACTCTGGATATATTTGTCAAAGAAAGAGTTCATGCTTTCCGATCTTGAAGCCGTG  
GATAAACTGGCAAAAGATACATCCCTCATAAAAGCAGGCACCCAAAGCTTGCGATTTTCATATAATGATTGA  
ACCCACTCGTACTCTCTAAGATTGAACCTTTCAATCAACTTCCACCATCTGTGTTCAAATTGTTCTTCAGTCCAT  
GATCTATATATGCACTTAGTAAATTTTGCCATAAATGTATCATGCCACAGACTGAGATATTCAAGATGCCTTG  
GGATCTTCTCCAATATACTCCACAGACTAAAGTAGTGCCCGGTGTCCGAAAGATTGCTCCAACAGCTGCTTT  
GATGTTGTCGTTTTGATCAGACAACAAAATTCTTGACCTCGTCCACCCATTGCCAGACACCATGTCCGCATC  
AACCATATGAACGTATGCACTGTCTCATCAGCAATTAGTGCACAACCTAGTAAGGTGGGTTGAATGTGATGGT  
TTGCTCCAATGAAGAGAACCAAAGGTATTTGTATTTGTTGTGAAGTATGTAGTATCAAATGACACCACGTC  
ACCAAAATTGGAATAATTATCCATGCCTTTGGCGTCAACCCAGAAAACATTCCTCAATCGATGCTCCTCATTT  
AAGTCCACGGAATAGAAAAATTTGGATTCTCTCCTGCATTTGCACAAGAAATTCAAGCAAGACCTGCGCA  
CCTCCTTCTTCTAAAGTCAAACCTTCGACCTCTGTCATGTTGATTCTGAAAAGATTTTCCAGATTACCAGAGAA  
TTGGTATGCACCGTACTGTTTTGATACAGAAGCCAACATCTTTTTCTTCGAACTTTTGGCGTATTCTTAAGTGG  
ATCAGCATTCCTGTGGCTTCTGAAAAAGTGCACTTGAGCTGGTAAAAGCTCATGGTTATGTTCTTTTACGAAA

CTATGAATATAACCACTTCCCATTTCGACGACCTTCTCTTCACGTGCATACTAGCTTTACAACCTATCTTAGGAGA  
AGGCCTAGGGTTGATTGCATCATCAGACTGCTGTTTGTTCATATCTTATGCATGAAAACCTTTGCATCAATAA  
ACTCTTTGGATGCCCTAGAACGACGACTACTCAATTTGGCGGTGCCAAAACCCGCTGATTTTGCATATTCTTTA  
TAGAACTCATAGGCTGCATCATGTGAATCAAATTCATATCATCTCGAGGCT

>TCONS\_00066357

CATAAAAGCAAGTAATTTTGTACTTAATGATGTAATATCATTTTGGTGTGACGTGACGGCCCGTTTCCAATTT  
CCATCAACCCAATCAAGATGGAACCTCAGGTCACGCTGAGAAAACCTCGAGCTCCTCATCCGGATCCTTGAAA  
GCGACCCGGAACCTTGCAACCTATACTACCAGTACCAGTACCAACAACACGAACAACAACCTCCAGTCCACCA  
CCCTGCAAGATGAAATGCATCAACAACGTCGGTCACGCGAAAACACAGGCGCTCATCCTCCATCCAATTTGG  
CGGGGCAGGCCGTAAAATGGACCGTTTTCTAATACGAATCACTGTTGTTTGAAGCCGGAGTTGTGGACTTTGG  
TGGTGGCATTATAGTGGCTTCATACCAAGCTCCACTGTACCCTTTTTCTTCTGTGCTGACTTCGACTTCAGAAC  
CAATGCTGAAGAAGGGTTCAATAAATGAATTACTAGTAGGTGACGATACATCGTTTTCCAATTTTACTACTTTT  
TCCTCAATTGTCGGCATAGTTGCAGTGATGAAATGCTATAACAAAGGCTAGGGTTTTGTGAATTGTGAGTAGA  
ATTGGAGTTTTTAGGTATTGGCGTGGAATTGAGCTGCTATTAACGCTAG

>TCONS\_00066393

TCAATAGTTGTTTGATTTAGTGCCTTGTATCTCCATCTTTCTTTCTCAACAAAATCAGCATCCAAGAATCTAGCT  
ATAAACTCCACAACCTATACAAATCTTCAAAATTTGTCATCATCCCAAGTGAAACAGTTATAACTGATACA  
CCACAATTCAATTTCCCCTTCTTATTATCTCTCACTTCACCACTTCTTGTTTCCAAGATTGCTTTTTTTTCATCAT  
CATACATGTTTGAAAACCATATATGCTGCAAAAATGCACAAGAAAGCGATATATTGTTGCGATCCGCTAGCTT  
CTGTACTAGTGTTGGATCAATCTTTTGACCTTTCCAATCAAACACATTGAATGCCACAGCTGGTCCTCTGTTGA  
AACTTATCTTTGGTCCATAGATTTTCACTAAAGAAGGATGAATATCTCCAGCATGAGGATGTTGAAGGCGCGA  
TAACGCGTTTATCAGCCAGTTTACAAGAAAGGCTCATTGAGGGAAGCAGATTGTTGAGTTGGAGGAGGAGGA  
GCTGATGACGAAGACGCGATTGAATCATCTATTGAATGATATCCCTTTTGTGGTAGTAAGAAAAAAGACCAT  
TGCCAATATAATCAAGACAAACATGTTTTGATATAGAAAGATGATAGTATTCTTGTGCTCGGATTTTCATCAGC  
TAGATTAGTTTGGTTGTAGTGTGGATATGCTTGTTTTAAGCTTGTAACAATTCTAAACATGAAGGCAAACACT  
CATGGTTAGTGAATTGAGAATTTGGTTGGATAGAAGAAGCCATTGTATCGATGAATTCGCGATGACAAGTGA  
TGATTGTGCTGATTTTAGAGTAGTGATTTTGGTTTCCATGGGAACCTTGGCAGCAACAATTGAAACAACCTTCT  
CTTGTCATTCTAAGACAAGGTGATTGCATTCTTGATTTAGTATCTTTTGGTCTTTTTGCTGGTTTTTTGGTTGCTG  
CAGCAAGTGAAAGTGTAACCTAAATTGAGTTATTTAGCCTAGTCTAGAGGGCAAAAGTTAGCACTTTACAAA  
CATGATTGACCATTTCATCTCAACTTACAATGCCCTCTCAAATGTATTTTCTCATAGGACATTTAGTACTATA  
TTGAAATTTAG

>TCONS\_00066394

TCAATAGTTGTTTGATTTAGTGCCTTGTATCTCCATCTTTCTTTCTCAACAAAATCAGCATCCAAGAATCTAGCT  
ATAAACTCCACAACCTATACAAATCTTCAAAATTTGTCATCATCCCAAGTGAAACAGTTATAACTGATACA  
CCACAATTCAATTTCCCCTTCTTATTATCTCTCACTTCACCACTTCTTGTTTCCAAGATTGCTTTTTTTTCATCAT  
CATACATGTTTGAAAACCATATATGCTGCAAAAATGCACAAGAAAGCGATATATTGTTGCGATCCGCTAGCTT  
CTGTACTAGTGTTGGATCAATCTTTTGACCTTTCCAATCAAACACATTGAATGCCACAGCTGGTCCTCTGTTGA  
AACTTATCTTTGGTCCATAGATTTTCACTAAAGAAGGATGAATATCTCCAGCATGAGGATGTTGAAGGCGCGA  
TAACGCGTTTATCAGCCAGTTTACAAGCAACTGAGTACTTAACTTACTGACTTGTATGATATGTTAAAGAAA  
GGCTCATTGAGGGAAGCAGATTGTTGAGTTGGAGGAGGAGGAGCTGATGACGAAGACGCGATTGAATCATC  
TATTGAATGATATCCCTTTTGTGGTAGTAAGAAAAAAGACCATTGCCAATATAATCAAGACAAACATGTTTT  
GATATAGAAAGATGATAGTATTCTTGTGCTCGGATTTTCATCAGCTAGATTAGTTTGGTTGTAGTGTGGATATGC

TTGTTTAAAGCTTGTAACAATTCTAAACATGAAGGCAAACACTCATGGTTAGTGAATTGAGAATTTGGTTGG  
 ATAGAAGAAGCCATTGTATCGATGAATTCGCGATGACAAGTGATGATTGTGCTGATTTTAGAGTAGTGATTTT  
 GGTTTCCATGGGAACTTTGGCAGCAACAATTGAAACAACCTTCTCTTGTCAATTCTAAGACAAGGTGATTGCAT  
 TCTTGATTTAGTATCTTTTGGTCTTTTTGCTGGTTTTTTGGTTGCTGCAGCAAGTGAAAGTGTAACCTAAATTGA  
 GTTATTTAGCCTAGTCTAGAGGGCAAAGTTAGCACTTTACAAACATGATTGACCATTTCATCTCAACTTAC  
 AATGCCCTCTCAAATGTATTTTCTCATAGGACATTTAGTACTATATTGAAATTTAG

>TCONS\_00066449

CACATCACATAAAGATTCCAGCCCCAACTCTCCTCAGTTATCTGTCTGTACTTCTTAGTCACTTTTCCAATCC  
 TTTTCATATCTGCAAAAGCTGTCTTCACATCTGCAAAGGCCCGGGTACCACCTCTCCACCCACATTTAGCTCG  
 AAAGCATGTCCATGTAGCTGCATGCCATCCTGAGTAATGAAGAGAGATAAGCTCTTTTCATTTGAATCCCCA  
 CCTGTGCACATTGGACAAAGCAAACCAGAGTATTGCCCTGGTCCACAAGAACCAATATCTATTCCAATCTGG  
 CTTAATTTCTCCTTCAGTGCCTTCACATGTTCTGACTCTGCAATTCCTCCACTGGGTCTTCCAGAATACTCCA  
 GAAACTGGTGGGGGAATACGGTGGGGCCTGTAAGACAAGTTTGAAGTTCCACGAATTGGGGAGATGGGTTTT  
 GAAGCAAATGTTGAAAAGATGAGTCTTTGGTTTTGAAAAGGGTGGGTTTTTGAAGAAAGGACAGGAATAATA  
 GTCTTGTGTATGGTAATGGATGGCTTGTGGAGAAAATATTTGGAGCCCATGGCAAAGTTATTAGAGTTGTTTA  
 GTACAAGTCTGCGATAAGGTAGAAGAATCATCCTGCTATTTTACAATGTAGAATTTGCAGTCATGGTGTGTGA  
 GTGTTGTGTTTTTGCAAGAACTTCGGAATGCGTGGGGTTAAGGAAGGGTTCTAT

>TCONS\_00066613

ATAATCGTGTTAATACCTGTCAGTGTATGTGTTCAATGCTTCGTGATCAAAACCTTCCTTCCCACTGACAAACA  
 TCTCAGCTGTAACAGAATTAGCATGAAACTCAACCATTCTTTTGAAGTCCCTTTCGCTCCTTAAATTAATAAGA  
 GTTTTCTATTTTCTGGAAGAAAGTATTTAATTGACACTGTTTTAAGCTCCAGATTGCACATCTCTGCCAATTTT  
 ATCTTCAGATGATCAAATGGAGTATCTTGGTTGATATTTACAGCATTTCCTCTCCTCCATTATATGACAAGGT  
 TCCATCGGCATCACTCGCAAATTCACCACCAGACTGGCAAATTAATAAAGCTTTCCCTTCACCATGGCATAA  
 ATCAATAATCACCATTACCAAATGAAAGATTGGTTAATCAGTGTATGCACAAACAGCA

>TCONS\_00066656

AAGCCATCCCTTTTCTAATACCTTGATGGAAGCCTAGTTCATGTTTTGGAACATTGATAACCACGTGAGCGA  
 CGTCCAGAGAAAAAATGTTTAGGGGATACTGCTGCAAATTAATACTAAAACTCTTTCTTTGAGACAGCCCAA  
 CTCTAACCTTGGTTGCCTTGTGTGTCCCTTGAGGCCTTTGCAGCACTCTCGCGTAGTTCGTCCGGAAGATCACA  
 GTTCATCATGACTCTGAGGTTGTTCCCTGTTTCATCATCTCTAGTTTATCTTGGAGCTCCTTCAGCTTTTCTTCGAG  
 ACAAGAGCTGGGGTAGACAAAAATGCCATATATTTCGAGCGGGCTGGGCTCATCTACATCAGTCAACTCATT  
 TTTTCAAGGCCACATCTTAATTTGACCTTTAACTTCTATCTGGCCCATTCAGCATTGTCCCCGCTTGAGAATTG  
 CAAGGTTCTATAGGAATCCTCGAATTTATCCCAATTCCCCAAACGAGTTGTACTGTAGCCCTCGACCTGGGTT  
 GCTTCTTTGAAAGGACAAA

>TCONS\_00066658

GCTTCTTCAACCTCCTTCTTTCTAAGAGTGACGCCTTCCTGATATGTAGCAATCTTTTATTTCAGTTTTTCTCTAG  
 CTACTTTGCCAGCCTCCCAGCACGTATTTGGGCACTTGGTTTTGCCATCATACTCGTCACTCCCATCACAGCAA  
 TCACAAATGCGATCATTAACCTTGACGAGTATATTGAAAGAGGAATATGTCCTGCATTTTTTGAATAAAATT  
 TCCATTGGGGCATGCTGAGGTCCCT

>TCONS\_00066817

CAAGAACAAAGTGACAAAACTACCTCACGATTGACGCCCAAATAATTGACTACAAGAAGCACTTGCAGGA  
 CTTTCAAGTCAACAAGGCAGCCACCACCTTCAGCTGGCGTCTGCCACCGTCGAGGCAAACTTTGTCGTGGGAT  
 GGGCAAGGATAAGCATTTCCTACTCTAATCGTCCACCTCTTAAATAAACTAAAGAGTTGGTAGAATACACAAA

TCACTCCACCCAAGCACAAATCCAAATCAAGGGAACAAATAAAGAAGAAGCTCAATTCCCATACAGCAAAT  
GTTCAAATCTTCCTATAAGTACTTTCTTTCTTGCAACTTGAAAAGAGAAGAACTAAAGTACAGAAAGTCTG  
GCTGCACTAGGCATGGATGTAGAGGCAAACATTGCTACCGGACCCATCAGTTTGTCTGCATTGCTTCTGAATG  
ATACTTCATCAGATCAGCATCTAGATCTTCTGCAGATACCTTTTCTCCACGATCTCCTCTTCCACGTCCTCTGCT  
GCCTCCTCGAAATCCGCGACCGCGTCCTCTACCACCCCG

>TCONS\_00066824

GATGAAGTGTACAAAGGGATCATCAATGCTTGACACACAATTTTAGATACAAAATGCCTAAAAAGGTTAGTA  
GGACAATAAGATGAAGGATAAGCTCACCCTCATAATAAATTCTTCAGCAAGACCATAAGAGAGCCAGTGA  
TTGAGCTCACCAACCCATCAACGTTCTTCTGACTTTGTCTACAATCTGATTTCTACCAACCATAACATGACATGT  
CAAATCTACAATTTTCGTCCAGAAGGAATCTGTAAACCTCCCACACGCGATCACTTGTACAATGCCTTCCAAT  
TTCCGCCTGCAAAAAGATATTAAAGGTCATCCACCGTGTGAAGAGGGATGAAGTGATGTAGTGAACCATCCG  
GAGCTATAAAATTAATAAACATGGGCATGATCACCAGGTCTATAAATGGGAGGTTAGTCACTTAAAGAGAT  
AACGCCTCCATTCAATTTTCTTTACAACCTTTGTCTTTAAGCAAAGGTGCATACACACACAATCCATCACTTTG  
AAACATTCCTTCACCCTAGATACTTACCGAGAAGATGCAGATCCCTAGAGTCTTCATTGCCAGTGTAAACGTC  
ATAGAAGACACGTGGTCTGCCCTTTCCAGATAGCTCCACAGGATTAGCAACCAAAAGTTCAGTATCTGGCCC  
ACGATTTGTGATGATAACACGTAGAGGATGAAGCATCTCCGCTTTAAGCGGGAACAAAGAACATCTTGTTT  
ATCTGGATCCACAATCTTTTTCCCATCCTTCTGAATATTGCAGTCTTTCAATGTGCGCATAATGTCATAAAGAA  
AACCCTTGTGATCAACACAACCAATCTGAAGTAATGTATGCGCGGGGCTCATCGAATTATCTATTGTCACACT  
AGCCCTCTTCAAATTCATCATATCTGGGCTAAGAACCTGTGTGCGAAATTCATTATCTGATAGTTTCGCACCTA  
AATAGTTCCTCAGCAACTGATGGAGAAAGAGAAGAGACACATTGCAGGTTGTCATACTGTGGGCCTGCTAAC  
TGAAGCTCACAAC

>TCONS\_00066825

AATTTACGGATGAACTGTACAAAGGGATCATCAATGCTTGACACACAATTTTAGATACAAAATGCCTAAAAA  
GGTTAGTAGGACAATAAGATGAAGGATAAGCTCACCCTCATAATAAATTCTTCAGCAAGACCATAAGAGA  
GCCAGTGATTGAGCTCACCAACCCATCAACGTTCTTCTGACTTTGTCTACAATCTGATTTCTACCAACCATAACA  
TGACATGTCAAATCTACAATTTTCGTCCAGAAGGAATCTGTAAACCTCCCACACGCGATCACTTGTACAATGC  
CTTCCAATTTCCGCCTGCAAAAAGATATTAAAGGTCATCCACCGTGTGAAGAGGGATGAAGTGATGTAGTGA  
ACCATCCGGAGCTATAAAATTAATAAACATGGGCATGATCACCAGGTCTATAAATGGGAGGTTAGTCACTTA  
AAGAGATAACGCCTCCATTCAATTTTCTTTACAACCTTTGTCTTTAAGCAAAGGTGCATACACACACAATCCA  
TCACTTTGAAACATTCTTTCACCCTAGATACTTACCGAGAAGATGCAGATCCCTAGAGTCTTCATTGCCAGT  
GTAACGTCATAGAAGACACGTGGTCTGCCCTTTCCAGATAGCTCCACAGGATTAGCAACCAAAAGTTCAGTA  
TCTGGCCCACGATTTGTGATGATAACACGTAGAGGATGAAGCATCTCCGCTTTAAGCGGGAACAAAGAACA  
TCTTGTTTATCTGGATCCACAATCTTTTTCCCATCCTTCTGCCGAATAAAAAGGTCTAATCCCTCTGACCCTTA  
TTAACTGAATATTGCAGTCTTTCAATGTGCGCATAATGTCATAAAGAAAACCTTGTGATCAACACAACCAAT  
CTGAAGTAATGTATGCGCGGGGCTCATCGAATTATCTATTGTCACACTAGCCCTCTTCAAATTCATCATATCTG  
GGCTAAGAACCTGTGTGCGAAATTCATTATCTGATAGTTTCGCACCTAAATAGTTCCTCAGCAACTGATGGAGA  
AAGAGAAGAGACACATTGCAGGTTGTCATACTGTGGGCCTGCTAACTGAAGCTCACAAC

>TCONS\_00066828

TTTCTATTCAATGCATTCTAATCATAATTCATGTGTGGTAAAACAGTGGTCAAGCAAGAGGTGGTGGCTTCGG  
GAGGTCACGGGGTGGTAGAGGACGCGGTTCGCGGATTTTCGAGGAGGCAGCAGAGGACGTGGAAGAGGAGAT  
CGTGGAGAAAAGGTATCTGCAGAAGATCTAGATGCTGATCTGATGAAGTATCATTGAGAAGCAATGCAGACA  
AACTGATGGGTCCGGTAGCAATGTTTGCCTCTACATCCATGCCTAGTGCAGCCAGACTTTCTGTACTTTAGTGT

TCTTCTCTTTTCAAGTTGCAAGAAAGAAAGTACTTATAGGAAGATTTGAACATTTGCTGTATGGGAATTGAGC  
 TTCTTCTTTATTTGTTCCCTTGATTTGGATTTGTGCTTGGGTGGAGTGATTTGTGTATTCTACCAACTCTTTAGTTT  
 ATTTAAGAGGTGGACGATTAGAGTGGAATGCTTATCCTTGCCCATCCCACGACAAAAGTTTTGCCTCGACGGT  
 GGCAGACGCCAGCTGAAGGTGGTGGCTGCCTTGTGACCTGAAGTCCTGCAAGTGCTTCTTGTAGTCAATTATT  
 TGGGCGTCAATCGTGAGGTAGTTTTTGTCACTTTGTTCTTGTCCACTGGTTTTACAATTGCAGTCCTTGTGCACT  
 TTGCAGTTTTGCTGTATGTGTCAGACTTAATTTTATCCATGTTGATAATGAGTTCTACAACTGTTGACTTAGGA  
 AGAACGTAAGTGGGATTAATTTTGGGCGACTAAAGCTGCCTCCCCTGACTAGAACTGCCTCCCCTGATGTACT  
 ATTGCAAATATATATATTTTCTACCTTTTATGACATGTTTATAACGAGCTTGAAAACTGTTGCATTAGGAACAG  
 GTAGGTTCGGAACATAATTGGGTGACTAAGGTGAATCCTTTGAATGATTTTGTCTTATTGCAAATACACGGGAT  
 GAGTAAGCTG

>TCONS\_00066893

GCTCTCTGATTACAGAATGGACATAATAGAAGTTAAAATAGATTAAAAGCTCAGGAATAAATGAAATGAAT  
 AGAAAATACGCTACTAATCTATGAGTTTTTAACCAAAATCATCCTTCTTGTTTCACTTCAACTTCCACTGCATC  
 CTTATAATATTCTACTTAACCAAAAAAGCATCCTTTAAGTTTACCACAATAACCTAAAACATCCCTCCATTA  
 ATATCTCCATCCACAGTTGAAGGGTCCTTTATTCTTA

>TCONS\_00066995

ATTTTTTTCCTCTCTATTTTTGAAATTTATTTGCATAATTGAGAGAGAAAAACACTGGCTGTTTCAGTAAGTTCA  
 GCTCTTTTTCTCTTCTTTCCATTTCTTCTTGAACCTTCTAACCTTACTCCAAATAGCATTGGCCTCTCATCTTGTT  
 GCTTTTTTCTTCTTTCTATAGGTATTGAGCTGCCGGACAAAGCTGGAGAAGTTGCTATGTTTAAAAAGAGTTG  
 GAAGTAAATCTCTAGCAAATTCTGCCGGCTGCCACACAACAAACGCCGTCCCATCGGAATTCCAAGAAACGA  
 CGTCGTCCGTGCGCGGATCCTCCACTAACATGTACGTTTTTAGCAAGAACGGCGACGGCGATGACTTCCTTAC  
 ATACTC

>TCONS\_00066996

GGTGTCTGTTTGTCCACGCTTTTCTACGACGAATATCACATAGTAAATCCCTTTCTCCCTTTCTAACTTGTCAT  
 TACTGAACTCCCACCGGCTTGTTGCTATTTTACGGAAACCATAGGTATTGAGCTGCCGGACAAAGCTGGAGA  
 AGTTGCTATGTTTAAAAAGAGTTGGAAGTAAATCTCTAGCAAATTCTGCCGGCTGCCACACAACAAACGCCG  
 TCCCATCGGAATTCCAAGAAACGACGTGCTCCGTGCGCGGATCCTCCACTAACATGTACGTTTTTAGCAAGAA  
 CGGCGACGGCGATGACTTCCTTACATACTC

>TCONS\_00067031

CGGGGCAGGTTGAAAAAGAGAAACACTGTTAAACAGGGCAGTGTCATGTTGAATTTGGGTCATGGCAATGCTT  
 CACCTGCCCCGCCCTGCCCTGTCTATTGCCATCCCTAGCCCCTATGAGAAAGCTTCAGACTTCTGAAGGCTA  
 TAAATAATTACATAGAAAAGAAGGAAGAACTATCTGGGCAGGAAACCATGGCGAGAAATGGCAATCTCA  
 AACGCTTGCAATTCTTTTTCCTCGAGCAAAACCATTGCAATCATAAGATGAAATCTCATTGATGTTGAGATCAA  
 CACAAGTCTGCACAAGTTTCTCTCCGACACGTTCCGCTGCTTCTACAGTGCTGCATGGTGGATCACCCCGGAT  
 TGATTTTTGCAAAGTGCTCCCGTAAAACAAAGACTTCTTATTTTGGTCATCTACCAATGTAGCATATAACCGTA  
 TTTCTGAGCAGAAGACTGAAAGTCTTGGTTTTTCAGGAGTTCCA

>TCONS\_00067038

TAATAGTAGCACTCAACTTCTTTACAAAGAAGTAAGGATCTTCAAGCTACTTTTCTTATGTTGGGCTTATATCC  
 AGCCCAAACCCAATATACCCCTAGTCGAGTCCATAAATTGACCGCTTCTCCATTCTCATTATCATCTGCACAG  
 ATAGATAAAAACCATGGCATGCAAGAAGGTGAATTGCAGACAACCTGTTTGATTAAATCCCGAAAGAGCG  
 GATGGTTACTCCAGTGAGCCGTGCTACCTTTTAATCACGCAAATGTCCATTTTTGAGAAGTGGGTCTGCTGTAA  
 TTTCTATTAGCAAGTGAAAATATTTGGGAAACTAACGGTAAGAATGACAACCTATTGCTCTGGGTAATATTTGT

TCGCTACAAATGAAGACTTGTGAGCTCTTTGGAATTTGTGTAAATCACTCATATACCCTTCCTATCCAAAATA  
AAAGCTTAGAAATAAAGCCATTGGTTATTCAAGCCACAGCTAAAGCTAATTCTCGAACTGAGAGTGCTAAAC  
TTCGAAATAGACGAATTAGAAAAAAGTACGTATGTTGTAAAATTATG

>TCONS\_00067046

TAATAGTAGCACTCAACTTCTTTACAAAGAAGTAAGGATCTTCAAGCTACTTTTCTTATGTTGGGCTTATATCC  
AGCCCAAACCCAATATACCCCTAGTCGAGTCCATAAATTGACCGCTTCTCCATTCTCATTATCATCTGCACAG  
ATAGATAAAAACCATGGCATGCAAGAAGGTGAATTGCAGACAACCTGTTTGATTAAATTCCCGAAAGAGCG  
GATGGTTACTCCAGTGAGCCGTGCTACCTTTTAATCACGCAAATGTCCATTTTGGAGAAGTGGGTCTGCTGTAA  
TTTCTATTAGCAAGTGAAAATATTTGGGAAACTAACGGTAAGAATGACAACCTATTGCTCTGGGTAATATTTGT  
TCGCTACAAATGAAGACTTGTGAGCTCTTTGGAATTTGTGTAAATCACTCATATACCCTTCCTATCCAAAATA  
AAAGCTTAGAAATAAAGCCATTGGTTATTCAAGCCACAGCTAAAGCTAATTCTCGAACTGAGAG

>TCONS\_00067073

GGTAAACGTGTACCCAAAATTAGATCATAAACAAGGATCAAGCTTCTTTCCTTGTTATCCTGAAACAGTATA  
TCCCGAGGGCTGATGTTATTTTCATGAATAACAGACGTGGCAAAATGCAGATAGAGTGACACTGAATATGCAG  
TGTAAGCAAGAAGAACCCAGAACTCATCAACCATAGGAACTCCATCGTTAAGTCTGGCGGTGAGCGCATTTCG  
CAACGGCAAAAGGCAGACAAAGCAGAGACATGCACATATTTGTTTTTCAGACCCTTGGGTTTCATCACACAAGT  
GAGCCAAAATCATCCTTCCCACAAGAAATCCGAATGCAAGCCCAGTCCCCACGACCATAAGATGAGGATAG  
TTCTTCATTAAGTCGGATGGAGATAAATAGTCCCATAGAAGCACTCCTCCCAGTAGCACACAACAAATGGGTAA  
AGCATGGCCAGTGCCCGTGGCATACTTCCTTTTGTGCTGAACAACCTTATGAACATTGTTAACATTGCAATA  
GACCGTTGGAATAACAGCAAAAGCTACCATCAGCAACAACACGGCTTTATTGGTTGGAATTTTCGTTTCAGAAA  
AGGAACCCAACTCACAAGTGGCATAGACTTCCCAAACCTGTTGGGCCCCACCACTCAGTCCCACTAGAGCTGT  
AAAGAAATGGCTGAGATATATCAACATAAGACCCTCTGTGCGTCCATTTACTACCGGAAGAATTAGAGTGTT  
GGTGAATAGCTTTCCCAAGTAGCGCAGTAGAAAGGAACAGCTGATATAACCCAGAACCAGAAAGTATCTC  
GTCCACACATAGCAGTGCTCCCAAAGCCAAGGCTTCAAATGCACATGCAAGCGCATCACATCCATGATCAA  
AAAGCTCTCCTAGTGGACTAGAGGAATTTGTACGTCTTGCTTGCTTCCCATCAACAGCATCAAACGTCTGATA  
GAGGAAGAGAAGCAATCCATGAGCAAAATTAACCCATCTTGGAGGAGGTGAATCCAATTGCGGAGAATATA  
TATATCCGAGCAGTGAGATGTGATTAAGAACAAAAATCCTGTAAGTGTAATCATATTCGGTGGCATCCAAA  
GGGGGAAGAAATTGACACAGCGACTCCAAAATGGCTGCAACACATACTTAGCAACATAGGAGTGATCTACC  
CCACTGTATTTGTACCTATGAAGCGCTTGCACTCCATGTGCCCTATGTAACCCATCCTTTCTTTCTTCCTCTC  
GCTCCCTCTGGAATCACCTATAAACCAATTGGAATCTGCACAAAAAT

>TCONS\_00067198

TTTCATGCTTTGGAATCTTTACTGAGTTGCAAGTGTGTTGGCCAAAGTATGTGGTCTGGTAAATGATTGAATTT  
TCTTGAATTGTTTGGACTTGTTTTGTGGCCCTGCAATCTTGATCGTTCTTGTTGTGTGCACCTAAAGTAACACCTT  
GGATACTTTGAATTGAGTATATTCTTCTGCCCATATTTCTCCATGCACAACCATCTTCCATTATTGCA

>TCONS\_00067261

GTCAAAACAAGGCTTTGCGTAGTAAAGTTCGCATGGCTTCTTTTTTCCAATATTTACCACCCCTGTTGACATAT  
TTCTAAACCTTGTTCTGAATTTTATGATATCCCTCAGATGATTTATATGAATTAATGAGAAGATCTACCACTT  
CTTCTGTCGGTTTTCTTCCAGCTAAACCATGTTGATATCCTCATAAAAAATCTTTGCTAATTGTTTTAAGAAAAT  
GATCTGACGGATT

>TCONS\_00067366

CCATGAAAAGATTGATCAAGAAACCTAAAATTTTGATGACTGTAGAGAAAAGGGTTGCCATTAATTTCTTGA  
AAAGAAACACCAGATGATAATTGTGGATCCATGAAATTAACCTCTTTTCTTTAGAAATCAGAAACAAGAAGG

AAATCTGAAGGGATAAGTGAGGGATGATCAACAAAAGGAAGTAAACCAGAAGCAGAAACTCTAAGCCTAT  
CTCTTCTGCTTTGTTGTGGGACATGATATGCTTCAAATCCCTCAGCCATATCTCACTGCAAAGTGAAGAGATG  
GGATGAAATGAAAGGCTATTATTATTATATCTGCTGATAACCCCTTTTTCAGTTCTGAGAAAGAAAACTGAGG  
ATTTAC

>TCONS\_00067393

GAGGTGAAAGGGTTATTTGAACAAAATGAAACAATCCAACCTTGGAACAAATGCAGCAATTCTGAATGAA  
TGACCAAACCTCACAGTTATTTTCGGTAGAAGATGAACATATACAACCTATGGTAAAGCAGTAAAGCTCCATG  
AAGTGAAGTCCTCTCACCATCATTGTAGGAATACAGTATGTCTCTCACTACTATCTCCTGTCAATGTTAAGGC  
ACCTATCTGCATTACATACGAACCGTAATTCTTCAAACACTTCCTAGTTCTCTGTTAAGTAATCAACAAACATC  
CTTTTTGCACTATCAGCATCTGAAGGAGGGGGTGGCCCGCTCAAGCTTGTCTGTCCAGCAAGCTTGATGAAAG  
TTCTTCGTAGCCTACGCAGCTCTGGCAAGCTAACAGATCTCGAGATATCTACAGTAGGTAATCCTGGACCAAG  
AGATACACCATTTGGGAGGTCCCCCAAGAGCATGGGACTGAGCTTCCACAATAGCATTGTGAACTTCTTGCGTT  
GCCCTGTCCATCTCATATAAAGAATTTGCCTCAGAACCACGTGCACCTTTGTGTTGCAATGGTTGGCTGTAGAA  
TCTTAACATCCCTTGTTTTAGAGTCCACTTTTTTTGTTAGATAGCTAACAGCATCAACTATAGCTGTAGACAAT  
TTCTCAATTCCATCTTTAGCTGGCCATAACTCAAATAATGGAGAATCCCATCTGTTTTTGCTATCTGGTGTTC  
AATCTTCTTACAAGATCCTCAAATATATTATCATCATAAGATGGTTCTCCTCTCTCATGACGTTCTCCGTTCCAT  
ATTCTACAAGATTCCTCATCAACATCACAATGGAGGACACAATATCTAATCCCTGCTGCTCTAGCCAAACACC  
ACAATTCATATCTATATCCCTTGATGCTATTCAGAGAATCCACTATACTATACTGTCCTTTGACAAAGATCTA  
TCAACTTCAGACCTTAATACGCCTCTTAAGTTCTTTTCTCGGTCATGTTTCGCATAACTTTGGTTGCGACTAAG  
ATGAAACGAAGTCTCATCAATAGTTCTCACTGACGGCTTTGATTCTGTTTCTTTAAGCGCTTCAGCTAAACAAG  
CCGCAGCTGTTGATTTCCCGCTACATGGTTGACCACAGATAACAACCAATGCCATCTTATGGGTGTTGTCCAA  
AAGCTTGTGAGAGTGGAGAAGAAAAGTTGGTTAAGTTAAAGAAGAGAAAGTAGAGAATGGGAGAGAGTTAT  
AACTAGGGTTTATGGTGTGCTTGCCGATGTT

>TCONS\_00067422

AAGTTTTCAATTTTATCTTAATTTTCATATTCTTGAGTTGAAAATAAGTATTATCGTTTATGCTGCAGGTTGGTTT  
CTTTTGCTCTCAAATTTCCCTTATCGTTTGGGAGTAGTTATCAAAACCCCTCTTCCCCAAAGGCTATATTATCGT  
TTATGCACAACCTGTTTCAGTAGTTATCAAAACCCCTCTTCTCAAAGCTGCAGGAGAGTGATTCCCTTCCAGCA  
GTAAAAGTGGACGGTGATGATCGTCAGCAAGCACGTGGTCTTGCCACTCTTACTCTCATCCAGTTGTACATT  
ATTTGCCGTTGACATAAATGAAGGTCGGTTGCGGATACTCAAAGAGACAGCCAAATTGCACCAAGTTATT

>TCONS\_00067436

GATTCTTAGCTAGTTTCCAAAAAAGATTGAGATTTAGTGAAAAGCCCTCTCATATTCTCCCTCAACATTGAT  
AGAATTGATAGGCTTACAGGTTTCCATTAGAGCTAAATTTCTGCACTCCTGTGAGCCTGATTGAATTGTTGAG  
ATCTACGTCCATTTGATAAAATGAAGCTTGCTGTTGATCCTGTATTCTGCAAAAAAAGATTCTAATTTCTTGTTG  
CTGGCTAGTTTCGCAAGTTGTACAGAAAAGAGACCAGAGGCAATAAACTTTTCATGATACCATGGTGTCTCTA  
CCTAGTTTCAACAGTAACATCCAGTACCTTCGAGTTTGAGTAGAAGAAGATGAGTCAAAGACTGTGCGACTG  
CTATTTGCCTCCACCAAGTGTTGTGAGATTTATAGTCCTTAGTGTGAAAATTATCCAATAATGTGTTCTTTAGT  
CAAGGATTTTCACTCTTGTTTCAAATCATTAAGTGGTTGTTGATCTTATGATGTCTTATTCCTTGAATGATTT  
TCGCCTTTTTATTGTGTAATTTATGTTATATAATTGATGCTTGTTTATACGTACACACTACCCTCTCCAGACCC  
CACTT

>TCONS\_00067557

CTTGATATTTTGCAATCCATTACATGCAGCATCAATAGATGTGCGGTATAACTTAATGGTATGTACTTCTGTAA  
TAGGTATGGATTCCTGCTGCTTTTTGTCAGCGAGAATCATTTTCTTATGTGACTTATAGAACCGCCTGACCTCT



GGGCTTACTGGATGATTGTGATGAAGCTCAACTTCCACAATTCTCCATCTTTTTGAGTCCACAAGCTTAATTAC  
TAGCATTGCAGGACAACCAGTTCTTGTTTCTGGCCTAGGATGATTGTGCTCCACTTTTCTTCTTGAAACCTGCAC  
TACTGCAGCTGAGTTTCGCTCTATATCTTTCTTTCTCTTTGATCTAAACCAAGAGTTGCTCACTCTAATACCAA  
ATCCTTGTTCCCTGCCATACATGTTATAAAAATCATATGCTTCATCAAAAGACCCAAATTCCAGACCAATAGT  
TGGTTGTGGGGACTCCTTTTTGGAATCTTTATCATGAACTCCATCATCATGTTCTCCACGGAGCAGTCTTCTTC  
GTCCTCATATTCTTCAGAGTCATCAAACACTGGGTCAGTGTTAAGAGAACTGCCTCCATCTGTTTCAGATTCT  
TCATCATCCACTATGATGGAGTGCAAGATAGAAAAGCAGTGAAATTCTCATTGATTTTAATATTTGATTTGTC  
ATTTTGAATACTCAGAAGAGAGTGGCTACCATCTTACCCAGAGAAAACAGATCTCCATGTCATCCT

>TCONS\_00067616

CACATGTAATTGATTCTTTGTATAGAAGTCCAGGTATCAGTGGTAATACATACTCTTTGTTTTGTTTCTATAAA  
AAACCTCTTCAACTTTTGCTTTTCTTCATTAAAAAGATCAAAACAATCCCTAGTTACAGTACTACGAGAAGGG  
ATCCGAAAATAAGGTTGCGCCACTTTCATAAAGTCTCTAAAACCTTCTTTCTCAACAAAGCTAAAAGGAAGCT  
CATCAACTATTACCATACGACATAATGCCTTCCTACATTCTTCTTGTTCAAATTTCCAAGTAACAACAGCTACG  
TCACCCTGACTACCCCCCGGAGCAGATTGAAAGCCTAAATTTGATTGTTTTTTATCAATAATAGCAGGGCGTT  
TAGGACACTTAAGCATATGAGAAAGAAGTGTCGACGTACCGTCTTTGGTCTTAAATACATACTCAATAAAGC  
AATAGTCACATTTTGCTTTTGTA TCTCCCTTCAGAAGTAATAATTTCTGTAAAATGATCCCACACAACAGACCTT  
TTTCTCCTTTTTTTGGTTATATTTGACTCCGTTGTTTGAGCTTGACTTGTTGCATTTGAATTAGAAGCCCCACTTT  
CACCCATCATCACCTTATCACTTTGTATATTTTCAGCCATGTATGAGTCACTGCAACAACAAAAGAAAAGGAA  
TGAGAATAAAGACATCAAGTTGTAACTAATCGTATTTAGTTATTAAAGTGA

>TCONS\_00067668

TTTAACTAGACATCAACATAAGCTATCATATCATTTCTAGATGAAATGAACACTACTATCTGTATATGATTTGA  
TTCATTGGGAAAGAAACAAGAGACATGTTTCTTCACTTGGCAAGCATAGCTTGCTGAGCCTGGTTTTCTTGTTG  
CTGCTGATAGTTCAGTGGCCTCCTGAAGAGCATGATGTGTGGCTCTGGTCGATGAATAGCATAGTGCACCCAT  
CCTCTGCTCTGCTGAACTCCAATTGCACGCCACTCATTTTCAGAGAGAAGACGATTCTTCGGTAACAATTTGCG  
CTACATCAGGAGGAAGAACAACATGCCTGTACTCGTAGGTGTCATCGAAGTACTTCTCAGAATACTGGATCT  
GCCCCATTTCTCAGTTCAAAA

>TCONS\_00067759

AAATCCTCCAATAAGAAGAGAAAGAAACAAGTTTGATTGTTGTATCTTGATCCACGAAGAAAAAGCATCAGT  
GCCATATCTTGATATACTGGTCATGACTCACTGAGGCTATGGTTCCGGTCGGAGGTGAATCTGCAAATGAAGA  
AATTATACCATCATGAGCTTGGTGTGGCCAAGTTCTGTGGCTCTGGTACATTGGATTCCACAGCTCCAGTAAC  
TCATGAGAACCAATCGCCAAGAGTTGAGCGCGGTCTGGGTGGAAGTGCATGACTGGAACCTTATTGCCACTG  
GAACGCAGTTCATGTAAACACTTTCTTCCGCTAACACACCATATCCGTGCACTATCCTCGCTCACGGATGCCA  
GGAAATTCCCGCTCATATCCCAACAGATAGATCTCTGACATCTCCGACATGTCCCTGTATATCAGAGAAAAG  
GAGACCGCATTGATAGGATACAGTAATGCTGCAGATAAGAAATTTAAGACAAGCTTGATTTGGAATAAAAC  
ATCTTACTTGTAAGTGTGTTGGATGCTGTTAGTCTCCACATCAAATATATTTATAATATTTCTGTAGAACATG  
CCAAAAGGTTCCCAAATCGAGGTTGGAATCTAACCTGTCTACTACCTCCCTTAAAAATGAGTTTGCAATCACC  
CTCACTGACATCCCACAGTCTAATCTCGTCATTGCTATCACAAGAACTGAGAAGACCCACCTTTGTAGGATGA  
AAGTCTAGGGACATCACATGATCAGCATGCCCCAAAAGTTTTTGAAAGGGTTGCTTGGCTTGGCTGCATCCC  
ATATCATCACAGTTCTGTCAAAGAAGATGTTGCAAACACCGTTGAATTTGGTTTAAAACGGATATCTGTAAC  
GAGATGAGCATGACCTTCTCCAGTGTTAACATCATTATTTTCCAAGTCCCAAATCACAACCTCATGTCCAGCA  
GCAGCCAACAACCTTCCCTTGTGAATGGAAGTGGCAACATAGGAGCTCGCTGTGTGTTGCGTGAAGACTTCCA  
ATCTCTTTAATAGAGATGCCTTTCTGGTCAGATTCAATGCAAGCAGCAATACTTTTCCCAATGCAGAGATCG

AATTAATTGCACCAATCAGACCAGCATCTCCCTGGGAGAAGTAGCTGTTAATATTGCCATTTCGAAATACCATC  
GGTAGTAGCTTTCTCTTTCCCAACAGCTGCCAGAGAACTCAGTGAAGCTTTCTCTTTCTGCCCCCTTTATTG  
AAGACTGCAGTCTCAGCTGGTTCCTTGCTCCTGCACTGCAATTTGATTTCTCTCTGTAGGAGCTAATATTTGC  
TGGTCAACTG

>TCONS\_00067832

ACATAATGCCAGCAAATCGTTTAAACGTCCTAGGGATACGAACATGAGGTTTTACTTCAAATAGGACGCCTTT  
CTCAGTCTTCACATACAAAGCTTTTAATCTCCCAGCTTTATTACCCGGCTATCTAAAATTGAAAGCATTGCCT  
GATGAGCAATATCAGGTCGATAATCAGAAGGGTTTCGATTATTCTTCTTAAGAAAGTTGGAATGTTTCATCTGA  
GTTGAGAAGTTGGTAAGTCTTTCCAATTTAGCAATTTCCAGAGAAGCTCTTTTCGATGATGAAAATAACACCA  
GGTTTGGTGCTTTGATCAGTTGAAACAACCGGAATACCAGCCAGTAAATCTACAACCTCGTTCAACTGCCTCTG  
T

>TCONS\_00067833

AAGTCTACAAAATCTTCCATTTGCGCTCCACAGCATTTGTGATCATGGATATGCAGTATGCAGCACTCAATGG  
ATAATCAGAAATCGATAGATAATCTTCGACATAATCTTTATCAATTTTCCCGTGGGCCATTGCCCCAACCACA  
AAAACAAGGTTTCATGTCCTTGTTGATGCCATTAACATATTCCTGAATATCCACCAGCTTCTCAGAACTATGAG  
AGAAGCCTATCTTCCGACAGTCGATGGGTAGGTACCGCGAAACAGGGTTTTCTCTAACACGTAACAGTTTCTC  
TCGCTTA

>TCONS\_00067850

TGAGGGGCTATCCATGTATTTGGCCTTGAGTTTACCAAGTACATGAATAGTACACAACCTAAGTTTTATATAGA  
CTGCTGATATATCAAATTTTCTTGTTGCTCATTTAGAGCTGCATACAAGACCAAACAACCAAACAGTGACACT  
TTACTCTGTTACGGCTTATCCTACCTGTGTAGATGCCTCCACTACTTATTTACTCACCTAACTAGCAAGCAGGA  
AAGCTTACAGCTGGTATTCATATACATTTACCAAATAGACCTTTTTTTATAAGGTAAAAATTTATTGAAAATGT  
ACCAAGATGGTACACAATAGTACAACAGGCAGCCAGATAACAACAATCGCATACTATCCTCTCCCTCCTAA  
TATCTCCAGAAAGTCAATATACTGATTCTGATTTAAATGGAATGGGTTCTCCATATCTGTTTCAGTCTTCTAGA  
TACT

>TCONS\_00067903

AGTGTGATAATGGTGGATGAAGCCCACGAAAGGTCCCTCTCGACGGACATCTTATTGGGACTACTGAAAAAG  
ATACAAAGGCGTCGTCCTGAGCTACGTATTGTAATATCATCGGCTACAATTGAAGCAAAATCAATGGCTGCTT  
TCTTTAATACCAGGTTTGTTATTCTTGGGATGAGTGTACTGAAGCTTTATAATTGTATACTCAAAAGTCAAA  
AGTCCAAATCTCCTGCCTGCTTTCCGTTGATGCAATTTAGTTGAGAAGACAATCCCTACAGCTGATTTCTCTT  
T

>TCONS\_00067934

AGCAGATCTATGGCCAACCTTTTCCCCTGTTTGTCCAATGCAGTCCTCAAAATTGGACCACTATGATACCAAAT  
GAACCACAAAAATATCTAATAACTCTCAAACACAAAATTGAACAGTTACAAGTCGAAAATGGTGGTCCTAA  
GCAACAGGCCAGAATGAAAATTGATATTATATGATTGTCATATATTATTTTATCAAACAGCAAATGCAGCAT  
ACTGCTCTCTATCAGTGATGTGCCTTAGCTTCAGCCTTCTGGTGAGACTTGGCCTTAGCCCTGAGATACTTGAG  
CTTCATGCTACCATAGACAAGTCCGAATGTGAATGCCGAGGTACGAGCCACCAGAGCAAGGGTGCTGGTACC  
AGAGTAAGGTCCGGGAAGAGGGCGCCATTGTTGACTTGCAAAGTAGAGCTTCTTCAAGATCTCTTTTAAAGCCC  
TAGATTTTTTACAAACCCTGAAAGGCCTGAACTTACCAACGACGGTGGG

>TCONS\_00067944

CAGCTCACACATATAAGCCCACCGTCGTTGGTAAGTTCAAGCCTTTCAAGGTTTGTGAAAAATCTAGGGCTT  
AAAAAGAGATCTTGAAGAAGCTCTACTTTGCAAGTCAACAATGGCGCCTCTTCCCGGACCTTACTCTGGTACC

AGCACCCCTTGCTCTGGTGGCTCGTACCTCGGCATTCACATTCGGACTTGTCTATGGTAGCATGAAGCTCAAGT  
ATCTCAGGGCTAAGGCCAAGTCTCACCAGAAGGCTGAAGCTAAGGCACATCACTGATAGAGAGCAGTATGC  
TGCATTTGCTGTTTGATAAAAAATAATATATGACAATCATATAATATCAATTTTCATTCTGGCCTGTTGCTTAGG  
ACCACCATTTTCGACTTGTAAGTGTTCATTTTGTGTTTGAGAGTTATTAGATATTTTTGTGGTTCATTTGGTATC  
ATAGTGGTCCAATTTGAGGACTGCATTGGACAAACAGGGGAAAAGTTGGCCATAGATCTGCTAGCACAATA  
ATCTTGTT

>TCONS\_00068073

GATCTATCAGGATTGCCATAACATGGATTAACGAGACTTCTTACATCGCATTTGTGAAGAAGCACAGAATAT  
CATAGGGGATTGTCACTGGAGGTTAACTTGGCCACTGCTTCAAATTTGGAATTAGTACTGGAGATGATGTTC  
AATGTAAGCTTTCAAAGGTGGAGTGATGTCGCTTAGTGATGGTGGTCCTTCAAGGACATCCCAAGCCCAGTTT  
CTCAAAGG

>TCONS\_00068107

ACATGAATACTAAAGCAGTAGTAATGTCAGGCTGACTATTCCTGAGAAAAACAAAAGCCAGAAAACTCCAG  
TAAAAGCATGGTCTATTCAACTTAACAGAGAACCTAGTTAGCGCTCAGACTAAGACCACTAGTGGTAGAGTC  
AACTATGAAACATTAATAATTGGTGCAGTCAAATTTAGAAGCTCACCTGTATCATCATGGTCCACCCTGT  
CTCTCAACCGCATCTCAAGCATCTCTCTTCCCAGCCAGTCGACTGAACTAGATGAACTCTTGAATCCATTAGC  
ACTTCTAGAACTGCCTGCTCCTCCATGGCCAAGGCCAGTGGACGCCATAAATGAACCTTGTGGGAATCACTG  
ACACTAATCTCTGCTCCTCTCTGCATAATTCCTTCTGGTGCAGTCCTCCATCCCATATGTGTTCTTGTCTACCTC  
GATGAATCCGAAGCAGTATTCAAGCATTTCTTCTACAAC

>TCONS\_00068172

ATACTAGAGCCTCAGATTCTACTAGATATCGAGTACTAGCATTTCAACATGTTCTTTCACACATCTTAATCGTC  
ATCACAGCCTAAGTTAACTGAAAACATAATAGAATTGCAAGAGATTTTCAGTGTCTTTATCTTCAGCTCTTTGA  
GGCAAGCTTTTCCTTTGCCTTCTGAATCTTCAACACCTTTTTCACAATTTTTTGTCTTCAACCAAGAAAGCGCG  
AATGATTCTCTCCCTTACAGCACTTCCAGACAGCACACCTCCATAAGCACGATTCACAGTCTGCGGTTCTTG  
GACAATCTGGATCTCTTGTATTTCAGTAGGTCTCAGGTGTGGAATCCCTTGGATTCTCTTCCCAGTAACTGGACA  
TTTTGGGCCGCTAGCTCTCTTCTTGTGCTCTGGTAAATTAGCTTTCCACCAGGAGTTTTGACAACCCTATGTTG  
ATTGGATTTGGTGGCATAGCTGTGCCGCTTTCGATATGTAAGTCTCTGAACCATCTTTTCAAGTAGATGGAGTT  
TTCCGCTTCTCTACAATGGTAAGATAAGAATGGACCAAAAGAGTTTGTATGAAGTGACGAGATG

>TCONS\_00068286

GCAACAATCACTAGAAGTTCCTCTTAAAGACTTTAAAATACAAGCAAAAATGATCAATCAGCAATCCTGCCA  
CAGCTTAGGCCAATGCTGTCACTATGAAGTCCTAAATTCATTTTTGAGCAACCGTGCAAGTCGATCCAACAAA  
CGGTAGATAAATACCAATACTTTTTCAAGAATCAAACACGTAGACAATACCTGAACAAACTGTAATTGAATC  
AGCAAAACGTGAGCTTTATTAGAATAATAAAAAACAAATCCAAGTACATAAAAAACAAAAATCAGAGATA  
ACACAAGGGCAAAACCCATATAAGTCAAATCCATATATCAATTTAAGCAAATGGGTATCACCTGCTATTGGA  
ATAAGGTGATCTGCTTCTATCTCTCCGGCTTCTGCGGCTATGTCTGCGTGCCACAGGCGAGGGTGACCGTGAA  
TATCTCCTTCTATGTGCTGGCGACCTCGATCTAGACCTTGAATATCCCTATCTCTACCCCTACCCATCTCTTCC  
TCAACTAATTATATGGAACACACAAAAATTCACCTGTTACTACAACAAAAAGATAGATCTTCCCCGGTGAT  
AACGATTGAAATAGAATAAAACCCTAAAAAGTGGAATGAAGTGAAGAATAG

>TCONS\_00068436

ATATTTTAAGCAAGATCGCGATAATGATCATATGGTGGTTCACGGTCAACACAAAGGATAGCATAGAGAGCA  
TAGATAATTCCAGGAACATAGCCCAATATGGTCAACACCAAGCAAATCAAGAACTCCACAGTGCAGCAACC

ATGGCGAAGGCAAACACCAAGAGGAGGAAGCAAGATTGCAAGTAAAACTTCACATAGAATTGCACATCTTG  
AGTCCATTCTTGGGGGGTAGG

>TCONS\_00068482

GGCATCTGGAGCAAGCAAGCTATTTTGCTGGAGACGCTGGATAGCTCTTTAGAACTTGCCATGATTAAGTTGA  
TCTTTGGTCTGGCTAGACAAGAGTGATGATACTAGGACAGCAAATCTTCTTTCTTGACAGGAAGAGAACTCC  
CAGCTTTCTCACAACCCATGGAGTCTACAGGTGCATCCTCAGAGGACCTCATCTTGCGGATTCTTCAAGAAT  
TTTTTCCAGT

>TCONS\_00068538

TTTTTTGTTTTCTTTATTTGATTTGCGTTTTCTTTGGGGACTTAGATTCCAATTTAATGTGTCTCACAACCGAGA  
AAAATTAGGGGGGTATTTTGGTTTTGGGTCTGCGACGAATAGGTTCAAGAGATGAGAGAATTAAGGATACC  
CACCAGAAAGACTAATCCAATCCATAAGGATGTACCAGAAAATACAACATTTTTGTTACTTGACCAGCCATC  
AGGAGAAGCAAATACAACGGGTACGCTAATCAATAAGATTAATGAAGTAGCAATTAATGCAAAAACAGCCA  
ATTGAAAAGCAAGAGTCATGCTTTTAATCCTCCAAGCTACCAACAAATGAACTATATACCATTTGATCCCTCT  
ATCAGCCAAAAAATATTAATTGTGATAAAATATGTCATCGAGGGATTTTACTTTATCATGAATCCATTGATTT

>TCONS\_00068565

CTACAATCGAGGAACTGCATATCTAGATCCTCAAGTTTTTGGTATGCATCAAGGAATCTCTTAAGCTGCCGTG  
GGCCACAAAAATTAAGGTTTCATGAGGAGTTTCATTGAGCAAATCGCGTTGGAGAGCAAGTATTCTTGCAA  
GACCAGTATGATGATCAGCATGAATATGAGAAATCCAAATACACCTTAAACCTTTTACGGCTTCATCAGCAC  
CTTCAATGCCAAATCTTCTTTTGGAGCTGTCCCAATGTTCTTCACCACAATCTAACAGAATACTTCCCTTTGAG  
AAAAGATTGACAAAAATAGAACTAACATTCCGATATTTGAAGGCTGAGATGAACCAGTTCCAAGAAGAAC  
AATCTCCACGTCCTCTCTTGTACACCTTTCAAACAACTAGGTAATGCAGTTTCATGCAACCAGGGCTCTTCGA  
TCATAACTTTGTTGCGCTGCATAGTCGCACTGCCTCCATTTGTAACATTGTTGTCATGCAACATCTGGGTAATA  
CGTTCAGAAGCATCTGATATTTAGGAATTTCTGATATTAACCTTTCTATGATTTTTGGCCGAGAAGTAATTC  
AGGAATACCAGATCTGTCTAACCCAAGCTGCGCATATGGACGAAGATGAACTTGAGGAGGTTCTCTGCCGT  
AACTTGACATGAAGAGAACTCACTTGGGGTCTTAGAGACTGAGAGTAAGCTCTTCAACTGCGGAAGGGACCA  
AAAACCAGGCGCAGGAAAGAATTGAGGGCACAAATAATTCAGTCTTGAGGCAATTCTTGCACTCGACTTCAG  
AATTGGAATTT

>TCONS\_00068568

CACACAATCAACTATTTTGCACATTTCTTGGATTCTTCGGATGGATATGAATAATATGGAGTAAGATAATGT  
ATAGACGACAATTCTTGAGATGAGATGGTGTGGGAGTCAACAACGAGTACAATAGGACCAGCAACAGA  
AGGCCCCAATACATCACTGGGACGAACCATGATATCTTGCGATCTGACTTTACTGAATTCCCAAGTTGCAAT  
TCACGGTATTTTGGGCCAGGCTCAACCCAAGAGCAGCAGCCTTTTTGGGATCAAATTTTCCCTTAATTTAG  
GCAACTCACAAATATAAACCACCGAAAGATCCCCAGGCTTAATAAAAATTCAGCTGTGGAATGCATCCTCC  
GCACATTGACACCAACTAGAGGATCATCCAGCTCAGAGGATCCTTCCTTTGTCGTGTCAGACACTTTTGAGTA  
ACGTGGTCGCAACAGAACAGCAGATATTTGACAACCTCATCGTTAATAGGAACATAGAGATCATCACTCGT  
CCCTGAAGAAGCAGTACTAACATCAACTGATCCAACAGTTGGGCCAAAACCTCCGTGCATGGACCATGGC

>TCONS\_00068681

TCTCTCTCAGAGCCCTCGCGATCCGAAACATGGCCACTTTCGCCGCCAGGTCCGTCTCCGCTCCGCCACTTC  
CTCCGCCAGAACTGCCGCCACGAGAGTTGCCGCCGCTGCCAAGCCTAAGGCCTCTACTTCTCCCTTTGCGCTC  
CCCACTCAAAAACCCCTCACTGCTCGCATTTTCAGGTCGCCTGTTGAAATGAGCTGCGCAGTTGAAACAATGC  
TTCCTTATCACACTGCCACTGCTTCTGCGTTGCTGACTTCAATGCTTTCCGCTACGCCTCGGAGTTATGGTTGA  
CTCTTGAGGATTGCAATGATGATCTATGATGAATGTCGGAGGGTTCAAGCGAAGTTTAATGTCCATGCACTCT

GAGACAATGTCTGAAAAATAGAGTACCATGGATGATTGGTAAAATGTTTTGGGATGCAGTGCATGTCTTTGTA  
GTCCAATGGATCTAGATGGACAATGTAACACTAGTACCCAAGTTATTTTCTGATGTATTTTGGAGTGAAATGA  
TGATCTTTG

>TCONS\_00068682

TCTCTCTCAGAGCCCTCGCGATCCGAAACATGGCCACTTTCGCCGCCAGGTCCGTCTCCGCTCCGCCACTTC  
CTCCGCCAGAACTGCCGCCACGAGAGTTGCCGCCGCTGCCAAGCCTAAGGCCTCTACTTCTCCCTTTCGCCTC  
CCCCTCAAAAACCCCTCACTGCTCGCATTTTTCAGGTGCGCTGTTGAAATGAGCTGCGCAGTTGAAACAATGC  
TTCCTTATCACACTGCCACTGCTTCTGCGTTGCTGACTTCAATGCTTTCGCTACGCCTCGGAGTTATGGTTGGA  
CTCTTGAGGATGGATGATTGGTAAAATGTTTTGGGATGCAGTGCATGTCTTTGTAGTCCAATGGATCTAGATG  
GACAATGTAACACTAGTACCCAAGTTATTTTCTGATGTATTTTGGAGTGAAATGATGATCTTTG

>TCONS\_00068731

CTTAAGAAAGGGACAATCTCCTCGACTGATAACCGAGCAATCCCAAAGGAGACCACATGGCGACCCATCC  
ATAGGACTAATCTACCAAATGAACCCCTCCCTGGGCAACGGACTACTTCTTTTTAGAGCGGGCTATTTCTAGG  
GCGAGGAATATATTTCTATTTAACTACTCCATCTGGTCAAGAGCCAGCATCTCAATGCAACATTATTCCATTCT  
CAGTCTGTAGTGCTTCTGCCAGCTAATGCTAATAGAAGATAAGAGATTGTTGAAAGTAACTGAACAAGGTTG  
TACAACCTTTGGTTCATTAATATCAAGTCTAAAGGGTCATGTATCCATAGTAAAAGTCCCCTGTGATCAAGCAT  
AGTTTGTGAAAGTGGGATCTTTTTTCCCACTTTAGCTCAATTGCATTGTGAACCTTCTTTGCTCAATCGCTTTCC  
TTAGGCACATGTCTTCAAGTCTTGTAGAAATTGATGAAGAGGAGCGGAGATGGAATGAAAGAAGCAATGAG  
AGAGCCTAATTCCCTCCTGACCGAGTATAAGCATGTTCCATTGGCCTTTATTACATTAGATTAGTGGGACTAC  
GGCTGGCTCTTCTCCTCAATCGGTGGAAATGCCATTCAACATCTTTGGCAACCTTTCTTTACAGGTGGTA  
GAATTATAGACCATATAACCTTGCCAACTAAAGCGTCCTACTCTACCGCAGTAAGGGCTTAAGCGATCGAAA  
TGACCTAACCTGGCTCCATCTAGAAGGTTGGAATCTTCCGGGTCTATCTGCTCTTCAATACCTTTGCCTCAACT  
GGGATTTGCAACCTTTGTTTTCGGTACCAAAAAGTGAAGTGGGTGAGAACTCATATGAAGTTTGAAGTTAGAA  
CCCAAGCGAGAGTCGTGGAAGAATCATTCTATAGGCAGAAATAAAGGCTTTCTTGGTTTCAGAATGGTTACA  
GGAAAACCTCTATTTTTTCATGCTTTTATGGCAGCAAGAAGGGGAAGGAGCCCTTTCTGGCTAATATCTGCTGG  
TCACGGGTGCAATTAGAGTACTTCAACTTGGAAGCTGAAATCCTACCTTTTCTTTATGCGTAAATCTGGTAAA  
AAAGCTCCCTTGGTGCTTTATAAGATTGCTTGAAACTCCGGGCATTTGCTCCCTCCAAGTATTATATATGGTT  
TTCCAAAAAAAAGCAGTTTCGTAATAAAGCTAATGAGACCATGCCCCGATAATGGTGCATCACCTACTCGG  
CCTCATCTTGCAAGGGAAAGGGGGATCCCCCTGGCTAGGAGGGTATTCAGCAAGTGCTTCCAAATCTCCTCAA  
CATAAGGGCAACAATTGATAGTTGAAACCTCTTTTTCAAGTCCCGGGGGACTAGTTGCTTGGCTCCGACCATT  
TCCGCTAAAGAAAAAGCCATTCTGACTAAAGAAAAGTCAAAACAAAAGGTAGGCGGTCAGACCTAGGGCA  
TGTAGCATAGAAAAACCTTCGCCCTTAGCGAAGGGTTTTCTGAAAGCTCCATTGAGAGCAGGTGCCTAAACG  
GATGATTCCAGTTCAACTCATTTTTGAAATGCTACCTCAAGAGAAGGGGGGCTCTGGCCCGGAAGATGCCTT  
ATATGGATAGGGTATATACTACTACGATTGGCTCTATTCCCTCAGAGTCCCAATCTTCTTGAAAAACGTGAT  
ACGCGGAACCTTGGTTTCGTGAATTTTCCAGTTGGAATTCCTACATTAGTATTAGTAGTTTCATTGACAACCT  
AAAATTCATGCTTTTGACGTAGCATCGGGTGTTACATGGAAAACCTTTCTATAGTGCCCCATTTCTATGATA  
TCCAAACCCGAAATATGGTGCTTTTGCTGTGCCATTGAGAAAGGAAAGCGCACTCAATCAATTAC

>TCONS\_00068811

GCTCCATTTCTCTGTATTCATGAGGAAGAAATTCTCCGACTCTTATCTCATCTTGTGACATTTATTGATGTTT  
ATTGAGGAATTTTACAGCATTGCACTTTTATCTTATTGTGTAATCTTTTTGAACGAGAAGTTGTTTTCCCTCCT  
GTTCTTAGTAGCTTCTCCTAGTTTCTGTTGTCATAGATTGGACTTATCTATTTTTGTTTGGATAATTTAATTTGTG  
AAGAGGAGCACAGCAGATGAGCCTCAAGTATTAACCAGAATGCTTCTGCCCTTTGTGGCAAGTGAAATACCA

ATTTGTGAAATGTGACTTAGCTTAACAACCTGTTGACCCCTGTAAAAGGATCAGGCTCTGAAATGAAAAGGTTT  
GGTCCAAGATATCACTCTGCTGCGGAGATAAGGCAGCTATCTCTATGAAAGAACTTAAGCATCCAACCCAAA  
ACCTTAAACAGAGGCTGGACCAACCTAAGAGCTTTATAAAATCCTTTGGAAGCCCTCATGCATATCATGTG  
AGACAATTACCAGTGTGATAATGATGTTACCAAATGTTGGCTCTGATACCACGTTGAATTATGTAACCTCGCC

>TCONS\_00068857

TTAAAATCCAGCCGCGGGTTTATCGTTGCAAGCTTCATTGAGAGGAACTCCACCTGTCTTTGAAGAGATTGTA  
CATAATTAATGATTTTCATCCAGCATTACTGCTTTCCAGTGACCTTGTTGCAACCAGGTACAAGATCCTGAAG  
ATATTTTCATCCGTTCACTGATCTTCTCCCTCCTTAGTCTTTCTGCAAGACTATGGCTATTTGTTGCCTGGCCTCTT  
CGAGCTCGAATGTGTATGTATTCTTCTTAGGTGGATCTGCCGATTGAGACCCCTGTTTACCATTCTTTCCACC  
AAGCCTGTTTTGCTCTCCCTTCTGAATTTCTGTTTGATCTTTTGTTGTTTCAGCTGGCAGTTGTTGTGCTCCCTTC  
GTTTGATCAAGTTCTGT

>TCONS\_00068870

ACATAGTTCTGCATTGGAGAACAGAGAATATACATAGTAGGTGTGATAATGTACACTTGAGAAGAAAAGTTC  
CAATTCAGTTATCCTATTTCTTGTGTCAGCCACATCAAAACCTTCCGCAGAATGGTACATGGACAGGAAAAATGC  
ACTTTGATTCTTCTGCAGGAATCTGAGAAAGTCTTGTAACCTTCTGCCTTAATTCTGTTAATGTTTCATCTTCAAT  
ACTTGCGTAGAACAGAATCTCCGGCAACTTAACAAAAAGCCGTAATAAATGCTCAGCTCCATAGATAGAGG  
ATGGAGAGGCATCGTCTCTAATTGATTCTTGGTATTGTTCCCGCTCGTTCTTGTAAGGAGCATAGCAGGCAG  
TGCTTTGTGCAAGTAGCATTGCAAACCACTAAGAATCTCTCCAACAGAATCAGATATCACTCCATCCTTTTTTC  
AGCCGATAGTCATGATACTTCTTTAATATTTTCATCTACATTTGGAGAACGTGGAAGTTTGACGAGCTTGCCCA  
AGTGGTTGACAAATTCACAATCATCAATCAGCTGTTTCTTTAATTGTGATGGTATTTGGATATTGACAAGCTTT  
TCTGGAGGAGGAGCATACTTGTCTTCTGCGAAACATCACTCTTTCGCTTTCTGCCTCTTCCCCCTGTAGAGCC  
TTTTGTTTTCAATTTGTGATCCACGTCCACCCTTTGAACTCTTATCTGTATCCTGTTTTTTCTTAAGCTCCTGCTGCT  
TCTGAATATTCTTCTGTGAGTTTCATCAGTCGATCTATGCCCACCCATTTCATCCCAGTTTTTTGTTCCAACCCT  
TAGCTTCATAAAGTTGTTGGCTATGAAAGGCGAGTACTTTTTACCTTCTTGAAAACGACTGGAGTCAACCAC  
GTCAATTTTCAGTATCATGAGGGGTTCCACCAACTTCATCAGAGATGGTAGTGGAATCGTCCGACACCCCAAC  
ATTTGAGCTC

>TCONS\_00068975

ATAGGGTCTCTTAGGAAGACTTAGACGAGATCGACTTTCACAAAACAGTCCCAGTGTCCATCTTACCTATATG  
ATGAGCACTATAATTTGGCGGTATTTCCAGCCGACGAAATCTAAACTGAATCTTGTATACTGGTCCTGGACCG  
CAGCTGGTGCACGTATTCTCCATAACAGAAGCTTCTGATAGAGATCCAGGTAGCCAGACAACATTTCTGCATT  
GTGGGTAACCCAAGCAACCAACCATAAAAATTACCATCCGGTTTTTTGTCTGAGTACCATATCTGATTCTAGACA  
AAGTCCACATCTCCGCACGACATCTCCAACCTGCTTGTTGCTCGCCACCGCTGGATCTATTTGATCTTTCAAAGA  
AGATAGCCATGGCTTCAAAGAGTTTTCTTTGTTGCCCTGGCATCTAAAAACAAGCTTTCATCTGCTGCAA  
GGAAGTTTCTAGAACCTCTGTCTTTCTTGGTTCCCATGCTAACAGCTTTCATATCACATTCCATCATAGCAC  
GGAGATATGGTTTCCATAGTTTCATAACCCATATCATCATATCCCATAACTAGCGCCTCCCCTAGTTTAGTTGGC  
GAGAACCGAGTGCTCGAGTCTTTAATTGCATAAAATCGATCAAGTAGTTTCTTTATATGGTCATGCATTGTTGC  
ATCAGTTCCAATGCCAGCCTTGTCATACAACCCAATAGATCAGCCTCACTTAATAGGGGAGGAGGTCTAGT  
AACTCCTGAATCAAGGGTCAAACCTTGTTGGTATAAACTGTTGACCAAAAAGTGTACGGGGGGGATCACTGAACC  
TCCCCATGATTCAAATCGGTACACGTCAAGGTAGTTTTTTGCAAGTATCACTCTCCACATGTAAAAAAGGAT  
TCACCAGCAATATCAATCTCAACTGTAGTTTCAGCCCCAACAGCAGGTTTAGAAACACAGGCCAAGAAATGG  
CGAACAACCAACTCATACACTCTATGGTGGTCTTGGCTCCACCTAGATTCTCCAGCAGAAAAATTTAGTTGGAT

GAATGGGTGGATGGGCTTTGTCATCATGCCCACCTCCACTAGGGTTTCTCCATAGTCCTGATTGAGGGTCTAGT  
AGGCGCTGCG

>TCONS\_00068976

CTACTTAGAAGAGACCAACAATTAGAGTGACGAAGCACACATAATGGTACCATAAAAAGAATGAATCTAAT  
TCTGCGAGTTAAGATTGGCCTATTCAGTGCAAAAACATCTTTAATGCAAGAGAATTCAAATTCATCAACCACG  
ACGTGGACAGACATTAGCAAAGTGACCTGGATCACCGCAGATGAAACATCGGCCAGTTATTGGTTCACCTGT  
TGCTGACACAAATGACACACCACTGGTATTTGGACCACCTTGGCCACGGCCTCCTCTTCTGCTGCTAGTGGAC  
GCAGAAGTATTTGTACGCTCACCTCCATTGAGGGTATCTTCCCAAATGAAAAAATTGCACTCCCGTGATTGAC  
ATGAAAAGAAGCTTTCTTCCCCTGTTGTTG

>TCONS\_00069012

TCACCTGATTCTGACCCAACCAACTTGCATACTCAAGATCAATCTTTTTTGCAGGGATGCTAGCATCTATGAG  
GAGGAAGACTGAGACAAGGGTTGGCCGTTTAGGAAATAATCTTTGGTGAAGTTAGCCCAATCTGTCCGTAC  
TTCATGTGGCGCAGCTGCATACCCGTAGCCTGGTAAATCCACAAGGTACCAGCTATCGTTGATCCGGAAATG  
ATTGATGCATTGTGTCTTCCCTGCAATTAGACAGAAGAAC

>TCONS\_00069014

ACATTTAAAGAGGAAATTAGATCTTGAATTCCAACCCGAAGAGGAATAACATATCTGTCTTGAGTTTTTCGTT  
AATCTGGATGAGGGTTGCTATATTGCTAAAAAGGTTTAGGTGCTTACCCGTTTATCACGTCATGTGCACTACTT  
CCATAATTTTGCCATTTTGGGGAACAAAGGAGAAGAATCCTTATCAACATCGGGTACACTAGTGCATCAAAT  
ACCCCATCTTTTTTGGGTTTTGGGTGAAAGTCGCCATTCACCAATATAACGAATGATCTTGCAGAGTATATTG  
AAGCAGGTTAATAATGTTTGCCTAATTCATTCTTTATCGTCGAGAGGATGTAATTGTTATGCGGGTATACCAAT  
TCTAGCATTACTTCTTAACCTCAAATTTAAGATGTTGTTTGTAGAATGACATAATTGA

>TCONS\_00069050

TTAGATGGTCTAGAGACGACGTACCCGTTGATGTGCTTGATATTCCATCTAATGCACAACATTCAAATGATAC  
AATTATAGAAACATCGGAAGAGGAGGATGAGTTTGACGATACTGATTGGGACTGGATGGAATCAGATGATTA  
AAGAGGGAAATTCTGAAATCTTTTAAATATATTCTGGTTTGAGATTTTTGGTTTTGGATCTTGTGATATTGTTG  
CACTTGTTGATAGCAATCGGTGAGGCTTGAATC

>TCONS\_00069069

GTTTATTGTTGCTTCAGAAATCTTTCCACACTGTTTGAGGGAACCCCGAGCATTAGGAAAGATGCACAAAGG  
TTCATTACGCTTCGGGAGGATTACAAGAGTGCAAAGCTTGCAGCGAGACTCAGCTCCTTATGGCCTAGCTCTA  
GTTAGAACCAAAATCACATGCTAATTAGAGTTGAACTTTTATTATAGTGGTGAGCTGGACAGAGTGCAATTGT  
ATTGTGAGAGCTTTTCCACCACCTC

>TCONS\_00069090

GAGGTGGTGGAAAAGCTCTCACAATACAATTGCACTCTGTCCAGCTCACCACTATAATAAAAGTTCAACTCT  
AATTAGCATGTGATTTTGGTTCTAACTAGAGCTAGGCCATAAGGAGCTGAGTCTCGCTGCAAGCTTTGCACTC  
TTGTAATCCTCCCGAAGCTGAATGAACCTTTGTGCATCTTTCCTAATGCTCGGGGTTCCCTCAAACAGTGTGGA  
AAGAATTTCTGAAGCAACAATAAACACATT

>TCONS\_00069142

CAGAGAAAGTTTACTAACCAACTTCAATATCTTCATAACCTTCCTCATCCATGGGACATATTTCTCCATTGC  
CTGTTTCTGATAAAGGCCGCCCTCCGGACACATCTTCATTTCTAGAACCAGTGTGTTTGTCTGGGTGGAGTAC  
AAGCCAGAGGGAACTCGTAATGATTTTTTTTTCAGGGGTTTTACATTTGAGGATCCATAAATAACTCCACAAG  
CAGAATCTTTGCGTGAGGCTGGGGTTTTCTAATATCTTCGATAATGAAGCTGGGGGTGCATAGGTATGGTTAAG  
TTTTTTTGAATCAACCATTTCTGTAGAACTGAGGACAGACGTGATATAATGATATCGTCAGTTTGGACGCCT

GTAGTCCATGTACTGTATTTGTTTGGGGAGGGGCTTTCTACCATTAGTTCAAAATCATCAACTTCTTGAAAATA  
TGCTCGCTCCTCATCATAGTTTGCAGCTTCAACTTTTTTACCCCTTGGAAGAGGTGGTTTTGCTTTTCGTCCAGG  
CTTCCTTTTTTGAGGATGTAATTCGGCA

>TCONS\_00069231

TGGTCATATGTAACACCTCCAAAGAAATCCATAAAGCTTCCAATTGAATTATAAGGCATAGCAGCATTTCGTGT  
AATGAATTTCCATTTGCTGATTCCAGTTCATGGTGGATTACTAGTCAATAATTCTTCAGGAAAGCAGAGAGAT  
GAATAATCAACATATGAAACTCAGATTCCAAGATAAGCAATGTGGATCCTCTTCAGATTTGACAATCATTTGC  
TTTGCCTTTTTTACGCAGTCGTCAAGCTCCTCATCAAAGTCACTCTCTTCTCCTCTTCTCTCTCTCTCTCTCT  
CTCTCTCTCTCTCTCTCTCTCC

>TCONS\_00069244

GAAAGGTTGGCTCAAAAGGAGATTGTAAAATCTTTTTCTTCATAATTCTTTGTGTTGGGGTTGTGTTGATATTC  
TTTGATCAACTTGTTATTCATTAAGAGGTTGATCTGACTTTTCTGTCAATTTACCGATGGTGTAGATGCATTCC  
ATAAAGATACAGAAAACCTCAACCAATCATCTACAGTCCAGGGACCCAAATTGATGATTTTGAATTTTTATGG  
ATTAGCTCACAGAAGAGTCCAAGATGGATTTTCCCTAAGGATGGTTAGGAAACTGATGAGGATAAGAAGATG  
CAGCTTTAACTGATACCTTTTAAGAATCTAGGGTAATGTGTGCGGTTGAGGTTCAGAATTCTTGGGTACTTGA  
GTTTCAAGAGCAAAAGTCAAGGCTCATTTTATAAGGACACATGTTTCTTTTTCGTGTACAGAAGAACCAGAT  
GATTGGCTGGAGAAAACCTGTCCGCAAACATCTATAGGTAAGTCTTGAGTAGGGCTGTCAAATTTGGCCCAAG  
CCCAATGACCC

>TCONS\_00069346

ATCAGTCATCAAATGATCATCATTTGGTGAAGGAAGAAACATCAAGTATTCCAGCAGTAACAAGGACATGA  
AAATGATATAATACGACCCAATCCACATCGTGGTCCAAATAGCCCATGTCCTAGAATGTATGCTTTTGATCCA  
GGGGATGGGCAGATGAAGTCAGCAGTAATGGGACAGAGCTGATCTGGAAGTCAAGTTGTAGTAATGC  
AACATCCAGAGGTCTCTGGAGACATGAACCACCTTTGCATTTGTCCATACCCAGGGATCCATAAAATCCAA  
GCGAACACGAATGGTCTACTGCCTGTGTTGCCAGGTTAACTCTAAAGCTACCCTGCTCATTGTCAACCAAG  
AAATGCGGAGTTCTTAGTTCCTTTTGAATCAAAT

>TCONS\_00069396

AAAGAGTAACAACGATACCAAGATTTTTACGTGGAAAACCTTTTTGAATAAGGGAAAAAACCACGGCCCCG  
AGAGAAGCAACTGATATCACTATAGCAAGAAATTTTACACTTTGTAGGTCCGAGTAAAATACTCCAAAGACC  
ACTACAACACTCAAAAGAAATAACCCTCTTTTGATATTTCCACCTTACTACAATATCGCTCACTCTCTATTTTT  
CTCACAGACTATTTTCTTATACCCTGTATGTGAAACCTCACTCTTTCTTTTT

>TCONS\_00069404

AAAAGAAAGAGTGAGGTTTCACATACAGGGTATAAGAAAATAGTCTGTGAGAAAAATAGAGAGTGAGCGAT  
ATTGTAGTAAGGTGGGAATATCAAAAGAGGGTTATTTCTTTTGAGTGTGTAGTGGTCTTTGGAGTATTTTACT  
CGGACCTACAAAGTGTAATAATTTCTTGCTATAGTGATATCAGTTGCTTCTCTCGGGGCCGTGGTTTTTTCCCTT  
ATTCAAAAGAGTTTTCCACGTAAAAATCTTGGTATCGTTGTTACTCTTTTATTCTTG

>TCONS\_00069409

TAGTGGAGTTTCACATTATTGCGATTATAATTGCCTTACTTCTGGAGTTTACAAAATGCCTCAAACGAAATGAT  
GAAGATTAAGAGAAAACAAGGATCACAAATTTTATTCTCTCGCTAACCTAAAAATGAGCTTGGATTGGGTTC  
CCAGCCCTCTAATAATGCCTCCTTTGGAAGTTCAACCTCAACTAGTGCAAGCGATGGCTCTACTCTTTGAGTA  
CATGCTCTGCCTTTGGAGTTTACAACTATCCACTGTCGATCTCATCGAAACCCAGTAGAAGAAAGGGCAGCTT  
CAGAAACAGAAATACCACGGCATGATTTCACTGGGTATATGAATATTGATTTAACTTGTGCAATTCCTACTTC  
TGCCATATCAACAAAGAAAACAACACTACTCTCTCTTTCTTC



GTCAGCTGTATATGCCAAAAATCCCTTGCTCAACTATTACTAAAACCTTTTAGCATCTTTAAGCTGCTACAGCT  
ACCTTCTTAACTCCTTTCTTCTGTGTTTAAAGAGGGGATGCCACTTCAGGTTTCTCAATTCCTTGTATATCCGTA  
ATCCTCAATTTTGTTAATTCCTGTCGATGTCCTCGTGTTTCGTCGATAATTCTTCCGTCTCTTCTTCTTGAATATAA  
GTA CTTTAGCATCTAATGCGTGCTCCTCAACGACAGCATGAACAGCTGCATCCGGCAATATAGGCCTGCCAAT  
GATTGCTGAGTCGTTGAGCCCAGCAGCAAAACCTTGTTTAGTATTAAC TTGTCATTAAC TTTCGAGA AACTTCA  
GTTTCTCAGTAAAAATGGAATCACCATTGCTCACTTTAAACTGGTGAGAACCAATCTGAACAACGGCGAAAA  
CGGGTTCATATGGTTTGAAGACCCGGTCCGATTTCTGAAGT

ATTCAAAGTTCATATCATAAGGGAAGAAGTGCCTAATTTCTCATACCGTGTAGAGACATTATTTAAATGGA  
CAATGTAATCCCTTACAGGAGATCCAAGGGAGTTCTATTGAGACATCACAAAAGCAACAAACATACGAAAT  
CAAATAACACTAAAAATGCAACAATATTATAGTGTTACTACCATGATCACTTCCACACCGCCGTATGCAACA  
ACAGCCACATCACAGAACTGCAATTATCCTTGAGATCTTGTAATCACACAGCTATGAGGACTCAATTTTCTTC  
ATCATATTAGTATGGGAGAGGAAAAAGAAAAAGCAACTATGTACATCCTTACACCTTCCTGCCAAGTCACTG  
GTTCTTGAAAGACTCGGAGTTTTTTGGACACATCCTTGATCAGGTCAGCAACTTCTCTCTTTTGCTCAGCCA  
TTTTAGATAGATCCTCCATTCTCCTCGAGGTCCTTACAGCAAATCTTTGGAAACCAGGGCTGTTGGCGAGTCC  
ATTGACGATCAATTCGTTGGCTACATAAGAAATAACCCTATGAATAAAGTTTCCTCCTCCAGCCATGGCTGAT  
TGCTACAACCTTCT

TGTTTTCTGAAAAATTTGACCGGCATATTTTGTACTTGGACATCTGGAACTAGATGATTAGTTACCATATTCA  
CATGAAAGCATTCTACTGAGAGTACTGCAGTAGGTATCGACAGAAGCATTCTTAGCGTCTAGGTAACATTA  
ACTGTAAGGCCAGATTTTCAGTATACAACAGAATCAAAGATCAAGTTTCACACTAGGCCCGAAATCAAGTGC  
CTTATCTACTTCACTAGCACCAAAAGCACAGCACCAAGAAGTGAAGGGAAAGAACTATCATCGTGAGTTCAT  
AATCTTCGAATTTATAAACAGCTGGGTATTGAGTGTGCTCCTCAAAGAGGTTCAAGTTCCTTTAGTGAGCCT  
GATTATTCAGAAGGATGAAGGGCCTATCGAAGAGTATCCAACAGCCTTGTGTTCTTTCAAAGTGCTGGCTAAC  
CAGTCCAGTCCCTCGTATAGGCCATCCCCTCTAAGAGCACATGTACCTTGTATATGCCATTTTCGGTTTTTAAG  
CTCATAGAGACCAAGGCCTTCACACACTTCCATTGGTGTGCTTCTCATGTCCTGTTTGTTAGCAAAAA  
TCAAGATGATTGCATTAAGCATGAATGGATCTCTGATGATGGCCTGAAATTCTTGTTTCGCCTTTCCAATCCTC  
TCTCGATCCAAAGAGTCAACGACATAAATCAGGCCATCTGTGTTATTGAAGTAGTGCCTCCAGAGTGGCCTTA  
ATTTCTCTTGTCACCAACATCCCACACGGTAAAAATAACATTTTTGTACTGTACTTTTTCCACATTGAATCCA  
ATGGTAGGAACTGTTGATAGAACTTCTCCTATGTGCAGTTTGTATAATATAGTTGTTTTGCCAGCCGCATCTAG  
CCCAAGCATTACAACCCTCATTTCAGAATTTCCGAAGAAGGTATCGAAGAGCTTGCGAAAGGCTTGTCCCATT  
TCGCCCTGCCTTTCTCTTCTTCTTCTTCTCTCTCTCCAAAAGCAAATCAGATGAAACTGGAGAGCGAAGCT  
CGAAGAATCGATGCCACGGAAAAAGATATATTGTGATGATCTGATGATAAAGCAGCTTGTTAATTGGGTGAT  
CAAATAGATATATGAAAGAGTACAACCTTGTGCTTTAAGAGAAGGTTGCGTTGTTTTTCCTTTTGGTTTCACTT  
TCTGCTGGCAACTTCTCTGAGTTTCTTTTATTTGCTGTTTTTTTT

GAACAAAATTAAGCTGGAAGCAAATATATAGACAGATATGAATAACATGACAACATATTTAACATACAAAC  
TACTGAAATATTACAAGCAAAGAAAGGAATTATGAAGCCCTAAATCACTAAACAGATGAAACATTTTGAAG  
ACTACCACAAACAAAGCCTAAGCTCAACTGAAATTACTACAAACATTCATCATCATAATTTCAAAAACTAT  
TCGGGCTTAAGAGTGTCCGACTTTACCTGTGAGCTATGGGTGGGGACTGGCAGTGCATAGCAAAGACAGCAT  
TGCATACATCCCTGAATATTAAGAGGACTTGTTTCTCCTCAAAGAAGCCAGCTCCTCGGTTCTCAAGGACACT

GACCAAGGATTTCTCACAATATTCCATAACAAGGAGAGCTTCCTTTGTACGACCCATATCCAAGAAGGTATG  
CGCATTTAGTGTGACAATATTAGGATGGCCCTTCAGCGATTTTCATCACTGAAATTTCTTTACGTACTAGATCAA  
GTGATTCTTCATCATTAACAATAATATGCTTTAATGCATACTGCTTTGAACCATGTAGTACATCTCGGGCTAAA  
TAAACACAAGAAAATCCGCCCTCTGCAATTGCATTGCGTACATGAACCTTGAGACTGCCAATATCAATGGTG  
CGACCTTCAAGCCCAGCCTGTTCTTGGGCATAAAAGGTTTGAATCTCCACATCATAAACAATTCAAAATTGG  
TGTA AAAAATCTACCTTGATTAAGTATGTTATCAAG

>TCONS\_00069664

TTCACCCTCAATATAGGGCCCAATACGAAGGCAAGCGTATAGACCTTGTGCTTTAATTTGCTTGATGAATGCT  
ACTATGTCACGTCTCTCCACTAAAATCATACTGTCCAGGACGAGGCTCATGAAGATTCCAAAAACATAGGTC  
TCAATCACATCTATTCCACCTTGTTTTGCTTTTGATATTAGAGATGGCCACATATCAGGGGTGCTTCGAGGATA  
ATGAATAGAACCAGAAAACAACATCTTCCTTTGTCCATCTATTATTAACGATCTTCCGTCATAACTCACATTTG  
CTCCGCCGGCAGCCACCGCTCTGCCATCACCAACACTG

>TCONS\_00069743

GCCCTTGAACATATGTTGCATATCACCAACAAAACAAAGGCCACATTGAGAAAGAACTGAACAGAGCCAT  
TTCAATTATCCAGCTCACATTAAATGCAACTGAGTTAACTCTTTATTTCAAAGTTCAAAACGACATACAGTTA  
CTTCCACGCCTTTTAGTTGATAAAACCACGTTTTCAACAACCAACGTCAGTGATGACCACCACCACCATCTCCA  
CCTTCTTTTTTCTTTTGTGAAGCAGCTCTTAACTGGCGCTGCTCCTCTTTGTAGATTCGGTTCCTACGTCGATACT  
CTTTTGAATGATGAAGGCACTCGAAGTAGTCTTCTCTAAGAAGGGAACAGTCTTTGGGTTCCTGCATCGAGA  
CATACACTCACTGAAGTCCATCCAGAAATCATAGCATCGCCCTTTGTTCCCTGTTATTCCCCATCCTGACGCCA  
TTGGAGCAAACCTCTTGTTCCCTCTTCTCTGAACTTC

>TCONS\_00069775

GTGGACGCTGAGCGGACAAGTTTTGCTGACCACTCGTCATCACAGATTCACAACTATTGTTGTCTGTGGTGGT  
AAGGGCTGCAGTTTGAGTCTGTTGGCGGAAAAAGCTATTCTCATACACCAACTGTGAAACTTGCTTCTGCAGC  
CTATCATTTTCTCCATCAACAGCTTATTCATTGCTATCAATTTTCTGTTACGGCTTGAAGACGCAACGATTCT  
TTACGTTGCTTCTCTCTACATCTTCTATTCTGAAACCAAACCTTTGATCTATTTTGGCTCGATGTTGGACAGAATT  
GGACACTCCCGAATCAGCTGCTGACGACGGAGTGAAGTGGGCTTTGGACATTCATGATATAATCTCTCCAAA  
GCCTCAACCTGCTCAGGAGTGACCTCACATATTTCCCATTTGTCCATCCCCATTTTACTGTCTTTACAGGCCGA  
TGTCACCGCCATCATCACTTCAATAAAAAATCAATTTTGAGAACCAAAA

>TCONS\_00069839

TCATTCTTAACGAATAGGATGTTTCGCCCTCCTTGGGTTTGTTAAAATTTCCAGCCAGACCCTCAGAGCTGGGC  
TCATAGGACCCTTGAAGATTATAATTTCCATTTGGATTTCCACTTTCTTTTGAACGCTTACTAGATTGAGGCGG  
CTGATGGTTGTGCTGGCCCTTATATATAATCTCTGTACCTGGCCATCCAGGGAGCGCTCAACCTTCTTCTTGA  
CTGGACAATTTGAATGTGTACACTTGTAATAGCTTCGAGGATATTCACTTCCCTTGACCTGCTTCTGCCCATAC  
TTTCGCCAGTTGTAGCCATCATCAGCAGGTTTGTCAACAGCAAAGGAAGCAGGTTCTGACCTCTGATCAGATA  
GGGAAACATCTGATGACTCTTTCACAATGTTAGGATTTAATGCAGGAGGAGGTATCTGTTGGTTTGTGCTGC  
ATTTGATGCGAAGGAATGGAAGTGTGACAGTGCCGCTGCAGCTGCTGTTGAAGAAGACGGATAGTCAGGCCG  
AATGTGCAGTTGAGACTGAGCCTGGGCTGCCTGAGTTGTAAATTGAGCAAGCACTTGCTGGCCAGGTGAGAA  
GAACCCATCAAACAAACCACCTGGACTCAATCCAGGCGGTACAGTAAACGTCGTAGGCGACTGACTTATCAC  
CAAACCCGTTGGCCTATTCTGCTTATACTCCTGTGCCGTCGCCGCCGTAGACGGCGGAGGAACTGGCTGGAAA  
CCCGGTGCAACGCCGGAACCCCGCCGGAGATGACATTGCACCGGCGGAGAAGCTGAGAAAAAGAACGAC  
AGTCCGAATCCGGATCATTATCGGAGAAAAAACTAGATACTAAGGTCATTGGACCCGGGCTAATACCACTT

>TCONS\_00069905

ATAGGCTCACAATTTCCGCGAGTACCAATGGTAATGGTAAATGGATTCAAAAAGCCATACCATCACCGAATAG  
GTGCACAATTTTTTCAGGAACCCCTCTTAGCTTTAGAATGTTGTTGATAAGAAATCCCACGAGAAGATCTGCCG  
CACGAACTCAATTGTAAGTTTCAGTAAGCATATCTGAAGCGGAGAAGATGAATTTCCCCAAGAAGGATGAA  
TGAAAGAATTGGGCACAAGAAGAAAGGCAATTAAGGGTGAGTAGCGATATGTGGATCTTTCATAAGGGGAT  
TTTCCAGCAGCGACTAAAGCAGCTGCATCTGAGAAAACAAGATAGTCCACATCTGTGTATCTAACTTCCATAT  
GCCTATCTTGCCATTCTCCGTAAACTATCAAAAATACCCTAAGGAATGCTGAGAATATGAGCAGAGACTTGA  
GATTTACTGTCACCAT

>TCONS\_00069930

CTGCGAAGACTCAGGCCCTAGACTCACTTCAATTA AAAATGCAATCTACTTCTTCTACAATTACACTAACATCC  
ATACTTTAATATTCCCTCACGCTCTCTCTCACTCAACACTCTTGACCCAAAAGAAAGAAAAAACATTTGGAG  
AAATAAGGAAAAAGAGCTCAATTTTCTCGATCTTCCTCTCTGTCAAAGGTTACTTACCTTCTCAAAAAAGAAC  
AAAAAGAAAATAAAAAGGAATTTGCGATGCTATGTGATGGAAGAGCTCAACATGGTGCTTGAATCATTCTAC  
AAGCAAAAAACATCATTTACCAGTAATAACAGCCGGAATGAGGAGGACTAGAGATTATTTTTTCTCAATTA  
AGTCTTCCTATAACATACTTGAGAGAGTGTGAACTTTCCTTGCACTTCAATTTGGGTTCTAGAGCTTCAAGGA  
AAATGTTTTTCTTAACTTGAAAAACAGCATGGAAAGCCATCCTCACTGCTGAGTTTGAGGACAATTTATAAAA  
GTTGGTGTTTCATATGCTAGAATATGGTAGAGAATGCTAAC

>TCONS\_00069951

CACTCTTTGCACATAATCAGGGCGTCGTTTGCTTGGCATGCGAAGCAATCCTGTAATCTGCAGCTCCATGACA  
GCCCTGCAAAACCTTGCTTGGCTCAATGCATCAGAATTGTTTTGAGAACTGCTGGTGTCTTTCTTTTCTTTGGT  
GAAGCCAACCTGTTTCAATCCTTTCTTTCTTGAGCTAGAAATAGTTGCTTTAAAAGATTGAAACCAGTCATGAA  
GATTGATGAGATCACCATGCTCCTGCGCCAGAGTATACATTATTGAGGTGTCATGCATAGATGGTACTAGTGT  
ACCCACACTCTTGCTGCAGCATCCACACTTGAGAATTTTGTGGAAATCCAAGAGATCAATTTGAACTCTTCTT  
CTCGGATCACCAACCAAAGCTGATTGGAGTTTGTCAACATCCCTGAAGCAAACAATTCATGAAATGGGACA  
CACTCAATGGGCTGCATATTCTCCCTTATCAAGTTAGTTGCCAAAGTCATAGCTTTTTCACTTGATGTGCATGC  
ATTTAGACTACGTCGATTGACATGCCTCTTCAATATATCTATTAATTCTGCTCTGCGACTTTTG

>TCONS\_00069952

GCACCATCTTCTGAAGTTTGGATAAGCTTGATGTCCTAAACGTCTGTGAATTAGGTCCGGAGGATCTGTAAC  
TAGACATGCCTTGAGGAATTGAGTGAGTTAAGGTAGTAAAGGCCTTCTGATTCAAGTCATGTTCCAATCGTC  
TGTCCCGTACTGCGGTCTGCATAATAAAAAGAATCATCAATAAAATATATACCACAATGGAGGGCACGAGTC  
AAACGACTAACAGATGCAAGAATAAAAAGGACAACCTAGGGACATAAA

>TCONS\_00069953

ATTTTGCGGATGACCTGATTTGTAAAATCAGCCTTTTTCTGTCTGTAATGGTGATGATTATTTGACAACAAGCT  
CATGCCTTTTGCACCTTCAAGGTTATTATCAGATGACCTGGAGTTGTACAAGCCAGGATCCAATGCCTCCCAA  
TACAAGTCCATCAGTGCAACTCTATGATATCTTCCAGCTTCATGCAAGCACATAAGGAGAGATCTCCATACTT  
TCTGCACTCTCTGCAGTTCCGATAATCCAAGGGCTAGAGTCATAACATTTGGTTCTACATGATTATTCTGTTGT  
CCTGAAAAAGTCCTGTACGATGGAAGATCGAAAGCATGCTTAACCAATGCCTCTGGCAATTTAGCAAGTTCC  
TCACTGCACGACCTCTTATTATCTCCGTCACTCAACTGAAAACCTTGAGCATGAAGCTAAGAGGCTCAACG

>TCONS\_00069960

GTCCTTTTATTCTTGATCTGTTAGTCGTTTGACTCGTGCCCTCCATTGTGGTATATATTTTATTGATGATTCTTTT  
ATTATGCAGGACCGCAGTACGGGACAGACGATTGGAACATGACTTGAATCAGAAGGCCTTTACTACCTTAAC  
TCACTCAATTCCTCCAAGGCATGTCTAGTTACAGATCCTCCGGACCTAATTCACAGACGTTTAGGACATCCAA  
G

>TCONS\_00069963

ATTTAATGTTGGATGATAAAGAAGACATGTGATTGATGCTTTTGCTTGAATATGTTTCGTGGTGGTTTTACATT  
CACATTAGTAACCATGTGCAGATCAAGTTGCTTCAGCTGCATCCCTTGAAGTGACAAAATCTTATAACTTTTTT  
CACCTATGATTGTTAACCATTTCAGAGGTCGTGCAGTGAGGAACTTGCTAAATTGCCAGAGGCATTGGTTAAG  
CATGCTTTTCGATCTTCCATCGTACAGGACTTTTTTCAGGACAACACAGGAATAATCATGTAGAACCAAATGTTA  
TGACTCTAGCCCTTGGATTATCGGAACTGCAGAGAGTGAGAAAGTATGGAGATCTCTCCTTATGCATTCTTG  
AAGTGCTTCAGATGGGTATCATGCTACCTCAAAGTTGCCCAGTTGACAATTTATCGAAATACTGTAGTTTTGG  
AGTCGAAACCTTGTTTTCTAAGTTGAGTACTTCAAAT

>TCONS\_00070085

AAAGAAACCAGGTGAACCCCTGATATTATTATGTGAAATATCTAAACTTTTCGAGCAGCGAGTGCTTTTCAAAT  
AGGCAGGATGGTACGCTTCCATCATCCAGAAAATTATAACTCAAATCCAACCTTTTGAGATTCCACAGTCTAC  
ATAAAGCTTCTGGCATGATCCAGTTGCCAATAGCATTGCCAGATGCATACAGAGACTGAAGATGTGTGAATC  
GAGTCAACAGGATGCCATATTCCAAGTCCAAGTTGTCTTTTATTGGTAAGAAAAATATCAAGAACACGTGAA  
TCATTGTTTCGGATCACTGCCACAAAAAATACCAGCCCATGCACAATAGTCTTCTCCAACCCATTCAATTAATTA  
AAGCAGAGCCATTGGGATAGTTAAGGGAGTCCCTCAGCTCTAAAAGTGCCCTTTTTCTCTTCCATTAATTTT  
CCGTCGCAACCCAAGAAATTCAAGCACAACAGTATCCAG

>TCONS\_00070144

ATGAATGTAATCTGGTTCTGGTCGATGTTGCGTATCAAGAGTACATTCCCAAATGAAGGATCCTTTCATCTATT  
TTCTGCTTGCTAGAACTGATTGGCCCGTCTTATTTATAAGTTGGGTCCGTGAAAAATCAATGTGGCTGAATTGC  
AAGATGATACAGCAGCTGTTGATGCTGTTATATTTGCTGTTGGTTGTAATTTTGTGCTGGTCACAACTACCA  
TTTCTTCGCTGAATGGCAAGGAGATGCTGCAGCTGTAGATGCTGTTTTGACTTGTTGATTATAATTTGTGCT  
GGTGACATACTACTGTTTGTGGTTGAATGGCAAGCATATGCAGCAGCTGTTGATGCTGTTTGTAGCTTTGTTGT  
TGTAATTTGTTGCTGGTGACAAAATACCATTCTATACAAATGTTTCAGGATTCTCATGATCGGTAAGGATCAA  
AACTCCTGAATAGCTGAAGTCATGCTAGGTTTA

>TCONS\_00070148

GCTTCTGCTCTTATGACGGTAATCCTTGTCTCTCCACGGTACCTATCACGGTCATACCTGTCCCTACTTCTACT  
TCGGCTTCTCCTTTTGAATCCTTTCCCTATAATGATCACGATGCCTTGAAGTAGGACTGCGGCTTCTTGACCT  
TCCTCTTGTACTATGTACAGGCTCCAAAATTCTACCTTTGTCAATTCTTTCAGCATTGGGCCGTACTTTGCAAA  
TTGAACCATTATTTCTCGACCATCTACAACCTCTCCATCGAGCTTTTCCACTGCCTTTTGAGCCTCATCCTGATA  
CTTGTAGCGTACAAATGCAAAACCCCTAGAATCTCC

>TCONS\_00070156

AGAGGTAGTTACTCATAGGCACCATGAAAACCTTCTACTTACTACTGCCTTTAACACATTCTGAACAGCAGAT  
GTAGACAACCTAAAACAAATGATGCTTCAAAGAGTTTACCAGGCTAAGTCCGTTCTAGAGTTAGTCATCTTTG  
CGATCTTTTGCTGAAACTCCATTTTGTTCACCATTAACATTTGAAGCTCCCTTTAACTGCTGGAGGACCTTCTTT  
TGATAGCGATAGCCCTTATCAGTTCCATAAATGTAATCGCAGTAGGTGAAAACCTGAAGCAAAATTACTCTGG  
CTTTGGCCCCCAACGTAGTGATGGTAGTCATGGTAATCCGGTCCACCATAAAAAGGTATATACTTTGTGATAG  
TCCAAGGAAGGTCATATCCACTGTGAGTCTCAATAGCTTCAATCTGTCTCAACGCGATCCACAACCAGAATGT  
AACCATATGACCAGGCGCAATAGCGGGCCCAATAGCTGAAGGAATCCCGAGGATCAAAATCTCTAGCCAAT  
GCGCATACGGCGCTGCAAAGCCTATTGGAGCTGTGTATTTCGTGGTGAACCTTGTGAATATTTTCATAACCCCA  
TTTACAATGCAAGAACCTATGGATCCAATAGTTAAAATAGTCCTCCACTATAAAATATGTTCCCAACTGCAAC  
AAAATTTCCCATACGGCGGCAAGGGCAAGCTTGTCTAATCCCAACCATCTTAACAGAGGGGTAAGAAACA  
AGCTGAAGGGGACCCACAACAAGGATGAACATACGCATAACAGACTTATAACAATTGAACACCTCAGAGAG

TGAAAGATTGACTTTTGGTTGAATTTTATAAGACTGAATAGAGTTTCTGAAGAAAAGTTCAAGGAAAAGGTA  
ATAAAGAGGGACACAAGAGAAGATTAAGAAGAGAAAAAGGATATTGTGGCAGTAAAGATAGTAATCAGAT  
TTGGTTGCAGAGTAATTGAACCAAATTGTCTCTAGAGTTGTAAGGGATCTTCCAATGGCAGATTCTGCCTCTTG  
GATTGTTTTAAAGGGCAACATTGAAAAGGGTTTGTAGTAAAATGGGGTTTGAGTAGAACTGTAATGGAATCTT  
GGATATTGGCTATGG

>TCONS\_00070159

CTCCATCTCTCTTTCTCCCTCTTCCGCCATAGCCAATATCCAAGATTCCATTACAGTTCTACTCAAACCCCATTT  
TACTACAAACCCTTTTCAATGTTGCCCTTTAAAACAATCCAAGAGGCAGAATCTGCCATTGGAAGATCCCTTA  
CAACTCTAGAGACAATTTGGTTCAATTACTCTGCAACCAAATCTGATTACTATCTTTACTGCCACAATATCCTT  
TTTCTCTTCTTAATCTTCTCTTGTGTCCCTCTTTATTACCTTTTCCTTGAACTTTTCTTCAGAACTCTATTCAAGTC  
TTATAAAATTCAACCAAAAAGTCAATCTTCACTCTCTGAGGTGTTCAATTGTTATAAGTCTGTTATGCGTATGT  
TCATCCTTGTGTGGGTCCCTTCAGCTTGTTTCTTACCCCTCTGTTAAGATATGACCTTCCTTGGACTATCACA  
AAGTATATACCTTTTTATGGTGGACCGGATTACCATGACTACCATCACTACGTTGGGGGCCAAAGCCAGAGTA  
ATTTTGCTTCAGTTTTTACCTACTGCGATTACATTTATGGAAGTATAAGGGCTATCGCTATCAAAAGAAGGTC  
CTCCAGCAGTTAAAGGGAGCTTCAAATGTTAATGGTGAACAAAATGGAGTTTCAGCAAAAGATCGCAAAGA  
TGACTAACTCTAGAACGGACTTAGCCTGGTAAACTCTTTGAAGCATCATTTGTTTTAGGTTGTCTACATCTGCT  
GTTCAGAATGTGTTAAAGGCAGTAGTAAGTAGGAAGTTTTTCATGGTGCCTATGAGTAACTACCTCT

>TCONS\_00070165

GATTGCATTAGCGATGCAGCTTACATGGTTTGCCCAACTCGCCATGGACGACACAAATTAATTGAATCCTATT  
GCGACAACCTGTTGCACTTTACCTCCAGTTGCTCGTGCACTCGCTTTTGACCTCCATCTGCAGCTTTAGAGCCG  
TAGTGATTTCCACTCCTGATGAACCATCCAACTTGATAGCATATCCCTCGATTCTTTCTTATCAGGTTTTTTCC  
CATCAGATGAGGAATCTGGAAGATATTTAGCAAGTCGATATTTCTGTAAATGGCTTTTTACATGGTAAATGGT  
TAGGCCTTGTACACCCATGACTCTAAGAACGCCTTTCCGGTGTAGCTCTATCCGGGCCACCAAGTTGTGCGACA  
GCATCAACAAATCGTTCATGAAGCTCATTGGTCCAACGCAGACGTTGCTTTGAAGCAAGACTAGGATTGTTG  
ATGTTATTGCCTCCACTGGTCCGATCCATTGAGCCGTCATCACAGTCTAATGACTGACTATGCACTGCTGCATT  
GTTGTGGGCTAAGCTTGAACCTGGAACGCCTTTGGGCTGATACATTTCAATTTAT

>TCONS\_00070217

TTTAACTTTAATTTAAGGATGTCAAGCAGAAGGTCAAGACAATCATCAGCAGGTTCTCAAGAATTTCAAGATG  
ATCAAATAATTGACCTCGTATCCAAGTTGCAACAACCTTCTTCTGAGATTGCAACTCGTCGCTCCAACAAGGC  
ATCGGCATCAAAGGTGCTACAAGAACTTGCAACTATATAAGAAATTTGAATAGAGAAGTGGATGATCTTAG  
TGATCGTCTTTCTCAATTACTCTCAACCATTGATGCTGATAGTCCAGAAGCTGCAATCATTCGGAGTTTATTAA  
TGTAACTATTAATAAATGTATTATGAGTTTTAAATATTGGAGTTATATTTTACTGCGTACCAATTAAGTTCTTGT  
TTTTCTTCTTAATTTCTCTAGACTCAGCTGGTCACTAGCTAGGCCAATCATGAGTTAGAATTTAGAAGTGAAT  
ATTAGTAATATCCC

>TCONS\_00070244

CAAAAGTAGGCTAAAAATGAAAAAAGGACAATTTTAAAATATGCCCTTTTCATTTTTTACCCTAGAGACCA  
CACTAAAACCTCCAAAATAGACATAGTCCTCCTATATACTCTATTTGAGTACACCCATTCTATACTAACAGTC  
ACAATACTAGTACTAGTGACCAAATTAGTATACATAATATTAATACTAGTATACTACTAATACTTCAAACCT  
TAAAACCCCATTTAGCTAAAATATTAAATTCTTGAGCAGCCAAATTTTTTTTCAAGTGAATTGAGCTCCAGTAT  
AAGTCTGTCCAAAAGACCAATGAGCAGGTGCAACATTGTAGGAAATCAAACCTGCGGCCATCACCTGTAGTA  
ACCTTAAATGAGAGGGCTTGGCCATTAAGATAGTTGTTGTTTTGCCAGTTTTGTCCCCAGTTTCTTGACATTGG

TTGCCAACCAGTTCTTGATCCTTTTACAGCTACAGCATGAACATCACCACCACCACCAACATTTGTTACAAGT  
ACAAGGTTGAAATATGAGTGTCCATTGATTGTGAACCTGATACCACC

>TCONS\_00070251

GGACATGAAAGCAAAAAGATACACATAAAATAATAGCAGTATCAGCGAGAAGTTAGGGTTTTTATTACATT  
TGCACGCAGACATTTTTATTCTTCAAAATTCCACTTTCAGTCTGCAAAAATTCCAATCATCAAAACCCAATA  
ATTTAATCAATTATTGGTGATTGTCAAGTAGTGAAGAATAATACTATTATCAACACTTCGTGCATGGTATTT

>TCONS\_00070296

TTGAGGTCATATCTAGTATTCAGAGTTTGCCTCGATTGTTGGTACCGCTCTCGCGGCCCGCACCGAAACAGTGCTT  
TACCCCTAGATGTCCAGTCAACTGCTGCGCCTCAACGCATTTTGGGGAGAACCAGCTAGCTCTGGGTTTCGAGT  
GGCATTTACCCCTAACCACAACATCCGCTGATTCTTCAACATCAGTCGGTTCGGACCTCCACTTAGTTTCA  
CCCAAGCTTCATCCTGGTCATGGATAGATCACCCAGGTTCCGGTCCATAAGCAGTGACAATTGCCCTATGAA  
GACTCGCTTTCGCTACGGCTCCGGTGGGTTCCCTTAACCAAGCCACTGCCTATGAGTCGCCGGCTCATTCTTCA  
ACAGGTTGTCTCTTGCCTGCCCATGGATTCAGCAGCAGTTTCGAAAGGTTGCCCTATTCGGAATCTCCGGATC  
GATGCTTATT

>TCONS\_00070375

GCCAAGTTTTCCCATTCATTTCATAACAAATTATTAACAATCATTAATCAAAAACATTTGTTGCTGAAAAGGG  
TCACTGGTTCCAAGAAGTACAACAGTTAAAACATAAATGCGAAAAGGTAGTCACCAAGTCACTCAACATAA  
GCCAGAAGTAGTGAAGTGTGTCGTCTCATAGAAGGTAATTTGCCTGAAATCAGATGCAGCCACCCAACAAAA  
TGGAATCAATTTCTCCTGAGACACGGGTGTTCTTTTGGGTTGGTCAGAAGCCTTCCCTGCAACAGACATGCT  
AGATGGGGACCTTGAGAAAAATGTTTGAGGAGCTTCTTCAGCAGCTGATGTTTTCTGATGTTGGGAATTCTGG  
GATGTGGAACCAGAAGGCTTAGAGTGCCTCTGTGGAATTTGATGCGTGGAATTCTCTTCATTGCTTGCGCTC  
CGCTCATTTTGCTCTCTTCTTCGATTTCGTCTCTTCTATCCCTTCCAGGGTATAAGCGAAAGGTATAAAGACAAA  
AGCTGTTGAAATTAGA

>TCONS\_00070432

TCTTGAATTCGATGTCATGAAGTGAAAATGTGCCAATGATGCTCTGAGGGTAAAGCTTCTTTAATTTTTTCAAG  
TCTTTTCAGAATCTCCAAAAATGAAGGTCTCTGGTTCATATCTGGTGCCCAACACTGCTCCACCAACTCTTTCA  
ATTCTGGGGTAAAACCTTTTGCCCTGAAAATAGGTCTGTGTCCTTCTGCCACGTACTTGCTGCTTCATATGGT  
TCATAGTGGGATAATGGTGGATCACCTTCTAGCATCTCATATAAGATCATTGCGAAAGAGAACACGTGCACTT  
TCTTGTCAATTTCCGGTGCTTGAAAACCTCAGGGGCCATATAGCGATAGCTCCCCGTCTCCCCCGTCATTTTA  
TAAACATCATGGGAGTTCTGAACCCTGATTAGTTTGCTTAATCCAAAGTCTCCAACCTTCAAATGGTCTGCATT  
GGAGTTGACTAGAAGAACATTCCTGGGCTTTAGATCTCTGTGGATTATAACATTTGGCTCATTGTGAAGATAA  
GTCATGCCTCTTGCTATATCCATAGCAAAATTGATTGCTGTGCGATGGACTAAGAGCACCTTTTTCTTGAGGTG  
CTGATGCAGATCACCCCCCTTAAGTATTCAGTTATTAACATTAAAGGTTTTTCTCGGTAACAGCTCCAAGA  
AATTGCACTATATTTGGATGACGGAGCTTCACCAACAAATTTACCTCATGCCTGAAATCCTGAATCACCAATC  
GATCATCTGAAAGGTTTGGGAGGATGCGCTTAATAGCTACAGGTGTTCCGCGCCAGCAAGCTTTTAATATCTC  
ACCAAAAGACCCCTTCCCAATGATTACAGAATTTGAGAAGTCCAGCTCAGCAGGATCAATCTCCAGTCACA  
CTTCTTTGGTAGAGGGGGTGAACAGCCCTTGGTTCAAAAATGGCTTCCATTTTGCCCATAGATAGTCCACC  
ATATGTCTTTAACAATTCAATCATGCCATGTTTCTTAGCTCCTTCTGCATCGGCTAGAGGCGTGTTTCTCCAAC  
GATCCTGAGCGTTGACGTCGGCGCCATAATCGATCAAGCACTTCGCAACATCGATCCAGCCATGTAACGCCG  
CGACATGAAGCGGAGTGCGATTATCGTAATCCCTAGCTTGAACAAGCGTCCGATCTTCTTCTAGAAGCTTCCG  
AACGGCAGCTGCATCGTTATGGTGAGCGTGCCATAGAATTTGCGATGTTTTGCTTACTCTTGACTTCTCTTCTT

CTTCTCCGTTGACGCTGCTACCGATGCGACAGCTTCTCCGCCACCGGCAGCGGAGCCGGAGCTTCCTTCGCTT  
CCGCTCATTGTTGGATGGATCGCTGCGTGTGTGTG

>TCONS\_00070530

AGCATAAAGAAGATGGGAATGGGAATGCCAGTACTTACTGTGCACATTCAGCTAGTTTCCCAAGATTTTGATT  
GTCCAATATGGCCAAAATCAGTGTCTTGTCTCATCCAGGTACTTTTGAATCTGCTCAGTGGTGATATTGTTAG  
GAGGAAAAGAGGACATGACTGGAATCATAGGTGGTGGCTGTTGCATCCTCGTATACTGCTAAACCC

>TCONS\_00070585

CACATAACAACACTACTAATGAGATTTGTTGATTTAAACACTTATGCTCTAAGCATCATTATACAAAAATAAATC  
CGTACAAAATCAATCTTCATCTGAACTCTCATACGCTACTAGCAAGCTTTTCATTGCATTATCTGCCTTTGTTTC  
ATTTCCCATGTCAGTTGATCTAGCTGGCAGGGTCTCTTTCTGCTTCTCCTGATTAGAATCAGTGTTATTACTTGG  
AGCAGCCTGTGTGCTTGCTGGGGAATTACTCCCATCAGATGCGGTAGAACTTTCTGCTTCTTAGGTTTGACTT  
CTAAAACCCTTTTAAGTAAATCTTGCTGCCTAATCCCACTCTTTGCCTTGGGCTCAACACGAAGAGGCAGGGG  
AATTGACGCTGGTGAAGAATCAGCTACAGATATCTTGAATGCTTGAATGCACGTTTTTCGGTACGTCTCAGA  
AGGCGTTCAGCATCCTCCTCGGCTTCCATCTGCTCCTTTAGATAAAGCAAGTCATCACTGTCCAGGGCGCCTCT  
CCCATGAAGGTAGCTCCACGTTCCCCAGCAACATCTTGCATCTGAACATATCAAGCACCCAGTAGGAAAAG  
CCAAGATCCCTTTGAAACCATGCGTTGGAAAGTGATTTCCCTCGTCATCTATCCTGTCTCCCTTTCCCTTTCCCGA  
ATTTTTTATCTTTAGGATCGGTGAGATTGGTGTATTCTCGAACTTCTCTGCCAGCCATGGCTTCAGTTAGATTGA  
TTAGAAATTGGTTGCTACGTGCA

>TCONS\_00070586

CACATAACAACACTACTAATGAGATTTGTTGATTTAAACACTTATGCTCTAAGCATCATTATACAAAAATAAATC  
CGTACAAAATCAATCTTCATCTGAACTCTCATACGCTACTAGCAAGCTTTTCATTGCATTATCTGCCTTTGTTTC  
ATTTCCCATGTCAGTTGATCTAGCTGGCAGGGTCTCTTTCTGCTTCTCCTGATTAGAATCAGTGTTATTACTTGG  
AGCAGCCTGTGTGCTTGCTGGGGAATTACTCCCATCAGATGCGGTAGAACTTTCTGCTTCTTAGGTTTGACTT  
CTAAAACCCTTTTAAGTAAATCTTGCTGCCTAATCCCACTCTTTGCCTTGGGCTCAACACGAAGAGGCAGGGG  
AATTGACGCTGGTGAAGAATCAGCTACAGATATCTTGAATGCTTGAATGCACGTTTTTCGGTACGTCTCAGA  
AGGCGTTCAGCATCCTCCTCGGCTTCCATCTGCTCCTTTAGATAAAGCAAGTCATCACTGTCCAGGGCGCCTCT  
CCCATGAAGGTAGCTCCACGTTCCCCAGCAACATCTTGCATCTTTGAAACCATGCGTTGGAAAGTGATTTCC  
TCGTCATCTATCCTGTCTCCCTTTCCCTTTCCCGAATTTTTTATCTTTAGGATCGGTGAGATTGGTGTATTCTCGAA  
CTTCTCTGCCAGCCATGGCTTCAGTTAGATTGATTAGAAATTGGTTGCTACGTGCA

>TCONS\_00070666

TAGGAACCTACTGATCTAAATATTTTGATATATGTACAGAACTAAGAATAATACAGCTATACACAGAATTCA  
CATTAACATACTTGCACCTTGAAAAAAGAAATTCAAGGAAAAGCTTACATCAACTTTCCAAATCTTGTTCTCA  
ACCTTAACCTTATCGGCACTTGGACCAAAAATCTGCCTCAGAAGTGCCATAATCAGAGTTTTCTTCCCTGACC  
CGGAAGGGCCATAAAAGAGAAGATGAGGACAATCTCCCGCTAACACCAGCTTTTGAAGATTTTGAGCAACA  
TCCTCGTGGACAATAACTTTGTCTAGGGTTTTGGGGCGGTACTTGTCAACCCACAACATCTTCAAATTTGAGCC  
AACTACTCTAAGAGAATGAGGAAAACAGGAGCCTGATTCGCGACCAATTTTCCTTGG

>TCONS\_00070667

CCTCAACAGGGGCCTAGGTGGCTCTAACAACCTTATCAGTACCATCTTGAGCAATTTCTGTAATAAATATGCTG  
TTCATTGCTTGCGGTGAGGAGTCAGCAAGTTCTTTAAGGCCATTAGACTAGGAATAGAGTTGCCCACTGTTT  
TAAGTTGTTCTGTCAGTGTTCAGGCATCTTCACCCTTTTCCCGCTGATAAAATCGCACAGGTACATGACACCG  
GCATTTGTAAGGTCCTGCTTGCCTTCCAAGGATAGTAGTTTGCCATCCAGACCATAAACCAGCCCTTTTAATTC  
ATCCAAATCACAATCAATCTTGATAGATCACCACGCACACCATTAACCTCATTCTTAACAGTTTTGACATC

TCCATTTGCTCATCCAATTTCCCATCCACGTTCTCAATTCGCTGTGTCAAATGCTTCTTTGTGGCAGCAAGAGC  
ATCAGAGACATGCTCCAGATGTTTTGTCAGATTTGAAACAGCAGTTGCCATATTCTTTTTCGTTACATACATAA  
GGTCCGAGAATGACAGACCCCTTCCACCACATGTATCCATAACCTAAGGCACCCACTGCAGCAGCTGGCACTA  
TCAGAGATGTCCAGTCACCACTAGAACTGCCATTTAGAACAGTAATTGGTCGTGCCGAAGCCAACTGTGCAA  
CCTCCATTGCCAACCTACGAACCTGTGCAGCAATGACATCCGATTCTCCACCATCTGATTCCCCTGATTTTTCA  
TAACTTTTGACCAAATTCTGAAGCTCGCCTATCACATCAGATAATTTACCGTTTTTGAAAAGCAAAGTACCTG  
TATACCCTGCTCCGACAATAAATACGATCTTAGTTAAGCCTACTCCAGCTTGCATAGCCATGGCCGGCGTTAG  
TCCGGTGATCAACAAATCCTAGGTCTTTTTATGACTCTCCGGCGAG

>TCONS\_00070734

CTTGGGGGACAAAATTATCTACCTGTGTTGGTGGGAGCTAGTAGGTACCCCGTTGAATTGTTGAGGTGCGACA  
AGCTGGCTGGGACACACAGTTAGACAAAAAAGAGATAACATATCCTGTTTGTAGCCTACTTATTACTAGACA  
TCAGCATTGCTTTCAATTCATTGGTGTTCATTCCCTCCTCTATCAGATGCTGTTAGAAGCCCGCTAAAATACT  
GTCAATTCCTAGAAGGGTACATTTGACAAGAATTATTGC

>TCONS\_00070756

TTTGAGAATAGGAGTTAATCCAGCTTGAAATCCTCAAGCCATATAAGAACTTCATTCTCATTATAAACTCCC  
ATGTGCGACCAGGATCATTGTAGCGAGCAAGCATACAACCCGATTGAGGTTTGAGACCGTCCTTAATAAGAC  
TGGATCTAAGTTGTTTCTCCTTTTCGCGAACAATATCATCTGTTGGCTTTCCACTAAATTTTAATGCAGCCGCG  
ATTCCTCCTTCTGTCTTTCTTAAGCTAATACCTTCTTGATTGGGAGCTGGTAAGCTGTTCAAAGATTTATCCGAC  
GGAAGAACTATCTGGATTGACACTTTAGATTTTTTCAGCATCAAATGCCTGAGTGAAGACAGGAGTAGTCA

>TCONS\_00070930

TACTGAGAAGTAGCACTTTGATGAAGGCACCCACAAATTAGAGCTACCAGTATCAAAGATGACAGTGAACCTT  
CTGAGGGGGAGTGCCTATACCAATCTCCCCAAAGTACTGAGCATCCATATAGTTCTTCAGTGCTACAATGTCT  
GTATCCTCAGAGGCCCAAGATTACCACGGAAGTTATTATACTTCCTAATGGAGGCCCTCAAAGCCTCCCCCT  
CCTTGGA CTGACGCGCGCAGCAAGTCGATTGTTTTGGTCAAATTTTATCTTTTTCAGTCCAATTCTAACCAAG  
CCATCATTGACGTAGACAAGGCCAAAGGAAATAACAGCGATGAGAGTAAATGGTGACAAGAAAAGCTTT  
TGCTCCCATATTGACCAGTTTGATGAAGCAAGAAAACGGAGAGAATGAATAAGAATAGAAGTTTGTAGATGC  
TTTATTGCATGAATAAATAGGAGAAAAGAAGAAAAATGGAACCAACTTTCAGACCCACTAAGCTGAGATCA  
GC

>TCONS\_00070984

CAGATAAGGAATAAGTCATGAGATTTTTGCAGGAAAGAAGTAATAGATTCTATTTGGTAGATTAGAGAAAAA  
AGATGTTCCACGGAGGAGGGAATACAAAATTTACCATTCTTCAACATAATGCTTTTGGAGAGGTGTTGTAG  
TGATTCAATCAAGAACTATGAGCTATGGTCAAGGGTATTGTTTTATTTATAGAGCTTGAATGTATAACTTGA  
GGAGACATGACATTTTCGCATGGGGTGAGCCTATGGAAGGGATTTTGAAGTGAAGGATGGATTCACTACATA  
CTGGCTACACTATTGAAAGTGGAGACAGTATGCTTTTGAAAGGATTTGTGGTATGATGGAAAAACTGAAGAC  
GCATACACAAAGCTGTTATATATGCTGCATATGCAGAATTGTAAGGCTAGGGTGACCTATTAGTTAAGAATG  
GAGGACAAGGGAATTATGTGGGACATGAGTGTGTTGAAGGAGACTTACTAGTTTGCAAGCGAGATGAAGTGG  
AGGAGTTTCTATGAAAAGATCTGCAGATATGGGAAATGAGGGAGGACAGAGATTATGTGAAGGAGATTACG  
GATGACAACATTCATGGTGAAATCACTCTCCTAGAGCTATTAGAAGGAAGGGAAAGAGGAGATATGGGGAA  
AAGCCTTGAAGATGAGGGTACCAAAGTAAGTTCTTTTTTCAAAAAAAAATAGCACGCAATTTGTGATGCATC  
ATAAATCGCGGATAAGCTTAAATAGATGAGACAAATAGCTGGCTTTACCTCTCTTCTATGGACTTTGGTCTAC  
TCTGGTGAATAATCTTGATTGTCGCTAAGGATGTTCCATGAGACAATGTCGACTGGAGATTAGAGAAAATCG  
GCATTGAGAAGTATGTGATTTGGAGCACAACACTGTTATGTCTCTTCTGGCTTGTGTGGAATGAAAGTAGGAG



ATTGTTCCATAATAGCAGGAACGACGTAAGAAGTGTGAAATGTTCTTTCTTTTCATGTATATTACTGGTGTA  
AAGGAGAGGTCCTTTCTATGTAGGAAGTTGGGCCAACTCAAGGCTTCAGATAATTGTGTTACGCCACAAAAG  
CAGTATGTAAATACTTCAAAGACTAGCTTAATGTACTTAAAATGAGATTTACTTGACTTAAAAGATTCCGAGC  
CCATAAAGGGAGTCTTTGGCCTGAATTGTTCTTATATTCTGAATCATGCTAATGCACTCTTTTGGTTACTAGATT  
GGTACTTGTATTAGATCAATACTCACGGGGCTGTAGGCTGAAGTGCTGAACCATGTCATATGATTTTCATCCTA  
TCTAAAAATCTGGAGCTGAGACTGGTGATCCACTTCATTGGAAAGAAAGAGATTTGCAAAAACCCATTATAC  
AGCTGAGCTTGCAAAGACAACCTTGCC

>TCONS\_00071037

GTCTCAACAGGACAAGTATTCATTGGGAACCACTTGGAACCTTCTACTCAGTAGCTTCCACGCGTTTTGCAGCA  
TCAGCTTCTTTACGCTTTTCCAAAGCAGAAATGCGTCCATTCAGAGATTCATAAACATCATTTCATCTGTTGAG  
AGAGGGAGTGGTGGGCGGTTTGGTAATCCTTGTGGAGAACGTAGAGACCAACGGCGGACGCCACCGCCGCA  
CCGGCGAAAAACGATGCAAATCTCACCCCTAGCACGTATCCCATTTTTTACTGAATTGAGAATGTACACCAA  
AGCGAAGCTGTGTCCTTTTTTGGGTATTTAGGGAAGGAAGGGAAGAATTGAAATTAG

>TCONS\_00071041

CTTTCTAATTTCAATTCTTCCCCTTCCCTCCCTAAATACCCAAAAAAGGACACAGCTTCGCTTTGGTGTACATT  
CTCAATTCAGTAAAAAATGGGATACGTGCTAAGGGTGAGATTTGCATCGTTTTTCGCCGGTGCGGCGGTGGCG  
TCCGCCGTGGTCTCTACGTTCTCCACAAGGATTACCAAACCGCCCACCACTCCCTCTCTCAACAGATGAATG  
ATGTTTATGAATCTCTGAATGGACGCATTTCTGCTTTGGAAGGCTGAAAGAAGCTGATGCTGCAAAACGCGT  
GGAAGCTACTGAGTAGAAGTTCCAAGTGGTTCCTCAATGAATACTTGTCTGTTGAGACATCAAAATAGATTCC  
CTAGGTTCTAGTTGCTTCTGACTCCGTTATGATGTATTTGATCTTCTGCATAAAGTTAGCTTTTTCTTTGTTTT  
GCCGTATGATGGGTCAAAAGGCACGTTTTCTGGAAGCGGTAATGAGAAGTTGAAGTCAATTTTGATCCTTGGC  
GTTTCTGAACCTATGAAATGTACTCTTGCCTCTCTTTACAATAAGATTCAGCTTGAACAATAATTTCTCAGCT  
AGCTATTAGTTGGATAATCGTAGGCTAAAATGATCATTATTGGTGATTCTGGATATACCTCGAATCGCACTTG  
GCAGTTCTGTTTGGGTAAATATTACTTAAAGTATTTGCTGAGTTTAC

>TCONS\_00071053

AACCCGCTTTTGGCGATGTGTAGCTCTGCAACACCAGCACTTTGATGGGCATGTGTAGCGTACTTCTGGCGTT  
AACCGTTAACCTTGAAGCCAGTTCACTTTTGCTGTCCTTGTTTCTGCTAATTTGATCTTTATGAGACAGTTTAC  
CAGGCTGCTTAGCTGTGACCGCCCAATAAATTTGGAACATGCTCTGTTTTGCTTTGGTCTCTGCTTTTCTGCTA  
TCCATGTTATCGTCTCTCTGCCTGCTTGCTGATAGGCATTGTTCAATAACCAGGATATTACGTAATATGTATGC  
TGACAAGACAGGAAGTCTGCTCAAGCACGGACATCAAAGTAAATGACGAGTTGGGGCAGGTTGATACCAT  
CCTCTCGGATAAACTGGTACTTTGACATGCAACCAAATGGACTTCCTAAAATGCTCCATTCTGCTGTAATGCA  
TATGGAACACGAGCCAGTAATGTTGAAGTTCAGCTGCAAAGCAGATGGCAGAGGACCTTGGCGGGTAA

>TCONS\_00071154

TACTGCTACCTTCTTAACACTTTTCTTCTCAGTTTTAAGAGGGGGTGCCACTTCAGGTTTCTCAATTCCTTGTAT  
ATCCGTGATCCTCAATTTTGTAAATTCCTGTGCGATGCCCTCGTGTTTCGCCGATAATTCTTCCGTCTCTTCTTCTG  
AATATAAGTACTTTAGCATCTAATGCATGCTCCTCAACGACAGCATGAACAGCAGCATCCGGCAATATAGGC  
CTTCCTATGATTGTCTGA

>TCONS\_00071245

GGGAACGTATTTTTTTGATTGTTGGTAATGTGGGGATGATTGTCTTACCTTATCACATCTCTCTTTTCCATATCT  
ATCAATAAAATCCTTCTCCAAGAACTAGCACTGTAATCTGTTGTTAGTAAGGCTCCAAGTTAATAAATCGGC  
TAAGACCATAATAGTATTATGCTTTTGAATTTTCAATTGGCTTTTCAACTTCTATGAACTCTACTGTTGTGTGGG  
CCTGACTTAGCTTATTCTTGTGTTTTGGCGAACTATAATGTCAAGCGCTTATCCAGGAGCACACCCATGATTT

TTTCTGGAGCTCAATACTTGCTTGATTGTGGAGACCTGGAGAAATATCAAGTATCACTGTAAGTGGTGGATCT  
TGAGGAATTTCTACAACAATGTGAGTGTCAAGTTTTTCATTGACCAGATATATCATAATATCACCACGAGACGG  
CAGGGCCAAGATATTTTATATTGTCATGGTCCAAGCATGAAGTTGTTGAAGTCATTCATTAGAGCCCTAGGT  
TTTAGCTCAATCTTCACAAGATGAACTGAGCAAGAGGGATAACTGACCGAGAGGGAGGTTAAGGGGACTCT  
GTCCTGAAGACTGAGGGGACTAACATGAAGTAGTGGTCAGTGACATGAAAACAAGGCTCCTTTTTTTGAATG  
GCAGTGGTGAAAACTACTGGTTTGGTCCTTGAAGCAGCTATTAGTTAAACAAAGATTATCGAGGACCACAG  
TTCAAATTTTCAAGTGGATTCAAAAAGCACTAGGTGATTTCTTCCTAACTGTCTTAACCTTGTTGG

>TCONS\_00071246

ATAATGTCAAGCGCTTATCCAGGAGCACACCCATGATTTTTCTGGAGCTCAATACTTGCTTGATTGTGGAGA  
CCTGGAGAAATATCAAGTATCACTGTAAGTGGTGGATCTTGAGGAATTTCTACAACAATTTTTCATTGACCAG  
ATATATCATAATATCACCACGAGACGGCAGGGCCAAGATATTTTATATTGTCATGGTCCAAGCATGAAGTTGT  
TGAAGTCATTCATTAGAGCCCTAGGTTTTAGCTCAATCTTCACAAGATGAACTGAGCAAGAGGGATAACTG  
ACCGAGAGGGAGGTTAAGGGGACTCTGTCCTGAAGACTGAGGGGACTAACATGAAGTAGTGGTCAGTGACA  
TGAAAACAAGGCTCCTTTTTTTGAATGGCAGTGGTGAAAACTACTGGTTTGGTCCTTGAAGCAGCTATTAGT  
TAAACAAAGATTATCGAGGACCACAGTTCAAATTTCAAGTGGATTCAAAAAGCACTAGGTGATTTCTTCCTAA  
CTGTCTTAACCTTGTTGG

>TCONS\_00071403

CCTCCTCCTCCATACCACTACACTTCACCTCCCCCACCCTGAAAATCACCTCCCCCTCCGGTATACATTTATGC  
TTCTCCGCCACCACCAGTCCACTACTAAGCAGTTTGAAAAGCTTGGCCATTTTCCACAACCACGCAAATTTCA  
GTTTAAATCACAAAATAAGTGATGGCTTCTTGAGGGAAAGATTCAGAGGCCCATGGTCAAAAGCAATTAATT  
TAATCAATAAGATCATCAACTTTGCAATTCAGAGGTTGATTCCTAGCGACTTGGACCACTTTGCTTCTACTTCT  
CTGGTGGCCTTCTTACACATTGTTCTCATTGTGTCTTCACGTGGAAGTGGCTTCAACAGCTTAGTTTTTTATTAG  
AATATTAATTATTTAGTTGAT

>TCONS\_00071410

GTGGGGACTTGTATACGTATTTTGGTGATGGAGGAGGTGGTGACTTGTATATATACTTTGGTGATGGAGGAGG  
TGGAGATTTGTAATAGTAAGGAGCAGGAGTTGGCTTAGGCTTCATGCATTCTTCATAAGGAGTTTGGAGGCA  
TAAGCAAATGGTTTTGCATAGAGCACAACTTCATATTTATTCTTTGACTTCACCTTGAGGCTAGCACCTTTAAT  
GCCCCAGTGTAGATTTGTGGGAATGTCACATTTTGAACCCTTTGGTGCTTTGTGGAGTTTAGCCTTGCATGCAT  
CTGCTCCATATTTGGCATAGGCAAATCCTTCGACTGTGATAGCAAACCTTGCCATTGATTTTAGTGGTACCATAG  
CTCTTGATTTTCTTGTCACCAACTTTGCATGTGACCTCAACAACAGCACCTTTGAGGTGCTTCTTGTTGTGGGA  
GTTCTTTGGGTATTTCCAGTCATAGCATCTGTAGCAGTAGACTTTTCCAACAACCTTAACGATCAAGGAATGA  
TGAGGAGCATAGTAATGAGTTGGGGGTGGTGGTGAAGTGTAGTAGTATGGTGGAGGAGGTGACTTAACCTGGT  
GGTGGAGGAGAGGAGT

>TCONS\_00071412

CTTCCACGTGAAGACACAATGAGAACAATGTGTAAGAAGGCCACCAGAGAAGTAGAAGCAAAGTGGTCCA  
AGTCGCTAGGAATCAACCTCTGAATTGCAAAGTTGATGATCTTATTGATTAAATTAATTGCTTTTGACCATGGG  
CCTCTGAATCTTTCCCTCAAGAAGCCATCACTTATTTTGTGATTTAACTGAAATTTGCGTGGTTGTGGAAAAT  
GGCCAAGCTTTTCAAACCTGCTTAGTAGTGGACTGGTGGTGGCGGAGAAGCATAAATGTATACCGGAGGGGGA  
GGTGATTTTACGGGTGGGGGA

>TCONS\_00071453

GTGAAGATGGGATGGAACTCAGTTTTTTTCTTTTCTTTCTGGTCTGAATGCCTACTGTCATTATAGAAGAGG  
TGTAACCGGCCGCATCATATGCAGACAGAAAGTGGTGATGGTTGTCAACTGATGCTGCAGCAGTGTGTTG

GGAGCTGTAGCAGCAGCTATTGTGCTGCCATTGAAGAACTTTGTGATCCCTCATACCTCTCCCGTCAATAGT  
TCGGTGAAAGAAGAATTCTGTGAAATGCGATGCACATTTTGGTGATGTGCAGTTCGAGTCGACTCATTTTCTTT  
CTCTTTCTCCTTCTCCTTCTCCGCAGCCCTTTCCCTTGCCCCGTTCCCTCGCCTTGACGCGATTTTCTGACCGGGAT  
AGAGACAACCCAGAACCTTTGCTTGTCTCAGAAGTGCTACTACAAGCAGATTTTCGACAAAGACACATGTTGT  
TGCTGTTGGTAATTCGGATCACCTTCCATTTCAACCTCAGCTGAATCAAGACCTTGCTCAGTTCAGCACTAGA  
CCTTTTATCCTCACTGATCTGTTGTGTGTCTGGAAGAGCATTGAGAGAAGGAAGCTCAGAGATTGAAGGAGCT  
GCTGCTTTTAAACAACCATTTCAACAGCTTTGCTTGGTTGATCATAACCAAGTCGATCTTGCAAATCATAGAACT  
GAATAGCTGTGTTAACAGACAGCCTAACTCTCCGATCTCGGAGTCCTTTTGAAGTCCACACTTTACTGTGCCT  
ATCTTTCCCTCCTGATGCACGAGAACTCGAACAATCCGATTTGAAGGCCACCCACAAAGCCTACCAATACC  
ACCACCGCCAAGGCCATGACTCCCTTTACCGCTTCATTTTCATCTTGTGACTCAAATCTACCATTTCCATTGC  
GGATTCTTGGAACCTTACACCCTTGTTTTTGAATCTCATCCACCTCCATACCACTTTTATACCTTTCTCAAACA  
ACCACTCTAAACCAACCCACCTTTCTTGAAAGAGAGAGAATAACACCAATCAGCAAAGAGGGTATTTTTTT  
TTTCTCTCTCTATGTGGATTTGGGATTGTAATTAGGGTTTAGGGATGGAGGAGAAAAAGAAAGGTAGATAAG  
AAAAAAAGTGTAGGTAGGTGTATGGGTGATGTGGGGGTGTATGTAGATGTGGGTTTTGGATGTACTTTGC  
ATTGATGATGATCACACAGAGTACTTTGGCTTTTTTCGGTGATATTTGCATACGCACACACAAAAATAAAGAGA  
AAAAAAGTTGGGTTTCGATGTATCGCGTTTGGTACCAGAGAGGGAGGGGGGGGCTGGTTGAAAATGTCAGAA  
GAGAGGAGAGGCTAAAAGAAGGCTCCTTTTTGCAGTGCTTTCAAAAGCAAAGCCTGTCTACTTGCTCAGAAC  
TCTTAGCTCCTCAGCCCTGTAAGAAAATTTACAGTCAAACCTCATAACCACAAAAATCAGAAGCCCCTACCCC  
CC

>TCONS\_00071454

GCAGAATGAGGATTTAAGAAGCACAATAATCTTATGGCACTGAAGCAGAGAAAAGCATGCTTCACTCAGTTG  
CAGCTGCTTCCATCTTCAATTTCCATTTGTGAAGATGGGATGGAACTCAGTTTTTTCCTTTTCTTCTGGTCT  
GAATGCCTACTGTCATTATAGAAGAGGTGTAAACGGCCGGCATCATATGCAGACAGAAAGTGGTGATGGTTG  
TCAACTGATGCTGCAGCAGTGTGTTGGGAGCTGTAGCAGCAGCTATTGTGCTGCCATTGAAGAACTTTGTG  
ATCCCTCATACCTCTGGAAATGAGGCAACAACGAAGAAGAATTGGACTGAAGGGTCCCCCTATTATAACCAG  
CAAGGCCGGAAGAAGACGATGATGATATGCTAAAGTTCAAATTATACTCATTAGCACTATTACTGGCATGGC  
CATTAGTTCCCAAATGGTCACTTAAAAATGGAAAATGCTGCAGCTCGGGATGATGGTCTCCCGTAATACTAA  
ACATTGGTGATGACACAGGGAGTGGCTGTTGTTGTATAGGATTTCCCAAATGAAAACCAGAAGTAGAGTTGT  
CGTTTCCACGAAGACCTAAAAGTCTCCCGTCAATAGTTCCGTGAAAGAAGAATTCTGTGAAATGCGATGCA  
CATTTTGGTGATGTGCAGTTCGAGTCGACTCATTTTCTTTCTCTTCTCCTTCTCCGCAGCCCTTTCCCT  
TGCCCGTTCCCTCGCCTTGACGCGATTTTCTGACCGGGATAGAGACAACCCAGAACCTTTGCTTGTCTCAGAA  
GTGCTACTACAAGCAGATTTTCGACAAAGACACATGTTGTTGCTGTTGGTAATTCGGATCACCTTCCATTTCAA  
CCTCAGCTGAATCAAGACCTTGCTCAGTTCAGCACTAGACCTTTTATCCTCACTGATCTGTTGTGTGTCTGGA  
AAAGCATTGAGAGAAGGAAGCTCAGAGATTGAAGGAGCTGCTGCTTTTAAACAACCATTTCAACAGCTTTGCTT  
GGTTGATCATAACCAAGTCGATCTTGCAAATCATAGAACTGAATAGCTGTGTTAACAGACAGCCTAACTCTCC  
GATCTCGGAGTCCTTTTGAAGTCCACACTTTACTGTGCCTATCTTTCCCTCCTGATGCACGAGAACTCGAACA  
ATCCGATTTGAAGGCCACCCACAAAGCCTACCAATACCACCACCGCCAAGGCCATGACTCCCTTTACCGCT  
TCATTTTCATCTTGTGACTCAAATCTACCATTTCCATTGCGGATTCTTGGAACCTTACACCCTTGTTTTTGAATC  
TCATCCACCTCCATACCACTTTTATACCTTTCTCAAACAACCACTCTAAACCAACCCACCTTTCTTGAAAGA  
GAGAGAATAACACCAATCAGCAAAGAGGGTATTTTTTTTTTCTCTCTCTATGTGGATTTGGGATTGTAATTAG  
GGTTTAGGGATGGAGGAGAAAAAGAAAGGTAGATAAGAAAAAAAGTGTAGGTAGGTGTATGGGTGATGT  
GGGGGGTGTATGTAGATGTGGGTTTTGGATGTACTTTGCATTGATGATGATCACACAGAGTACTTTGGCTTTTT

CGGTGATATTTGCATACGCACACACAAAAATAAAGAGAAAAAAAGTTGGGTTTCGATGTATCGCGTTTGGTAC  
CAGAGAGGGAGGGGGGGGCTGGTTGAAAATGTCAGAAGAGAGGAGAGGCTAAAAGAAGGCTCCTTTTTGCA  
GTGCTTTCAAAGCAAAGCCTGTCTACTTGCTCAGAACTCTTAGCTCCTCAGCCCTGTAAGAAAATTTACAGT  
CAAACTCATAACCACAAAAATCAGAAGCCCCTACCCCC

>TCONS\_00071557

GAAATCTTTAGTTTCGATATACTCCATATAGTTTGTACCTATCAAAAAAATATACTCTATGTTTGCAGTCTTTGT  
GCTTGCTGAAATTTGTTTTCCACTCTGTGAGCTTGAAGCTAGTTTGACCTGAATTTATATGTCTAGAATAAAAT  
AAACGGAAACTTAGTTTATAAATATTTTCATAGTAGATGGTGGAGCAGAGATGCCTGATGAGGATGG

>TCONS\_00071719

AACCATGCCCAAATTTGGGAATCACTCTAGGTATCTGCTGCAGGTTGAGTCAATCCAGACTGTACAAGCAAG  
TTGTTTCAGGGATTCCGGCGAGTGCACCTGGTATTTGACTTTACCATTGAAAAGGGACACCTCTGCTAGCTCAA  
GTTTCTCCGAAGTAAGACTTGTACTATCCATTGTCTTACTGAGCACCTTCAGAACAAGTTGAACCGCTTCCTCT  
CTTGATCTCATCCTTGTAAGTCTGCTTCAACATCGACTGTGCTGCTTGAATGTTAGCACCGATGGCTGCTGC  
CTTCCAACCGCCATAGTTACCACTTGGATCACTCATGTACAGTTGGAAGCCATAGTTCTTATCCCAGCCTGCA  
AAGAGAAATGAGACACCAAATGGACGAAGCCCACCAAACCTGTGTGTAGCCTTGCTTGGTATCGCACAGAGA  
CTGAACTAGCTGTTTCGACAGGCATTGGTTCTTGATAAGCAAAAGTATACCGTTGAGCTTGTACTCTAGCTGTG  
TTGATGAGGATGTTGGCATCTGACATTATTCAGCCACAGCACATGCAACATGGTCATCAATCTTATACATCT  
TTTCAGTGGATGTTGAAGTCTGAAGTAGCTTTGAGGTAACCTTCTTTTCACCTACCAAAACTACGCCATCTTTA  
GCTAAGATACCTATTGCACTCCCTGCATTGCCAATGGCTTCCATTGCATACTCAACCTGATATAAACGACCTT  
CTGGGGAGAAGATAGTTGTGCGGCTATCATATCTTCTAGACATTGTATATTAGCTGGATTTTCGCTGGAGAAAG  
AGATGGAAAGAGTATCAAGTGTGCACTTGCG

>TCONS\_00071788

CAAACAGGACTTTCAGCACCCCTCTTCAACACTCAATTTGCCACCATTGATAGTCATATCAGTTTTGACATAAC  
CTGGACAAACACAGTTGATGAGAAAACCTGGGTATTTTTTGGCTAATATTCTTGTGTAAGCATTTCATTGCTGCT  
TTTGATAGTGTATATGCAGGAAAAATCAGAGACCATTTTTTCAGTTTCCATCAAACCGTCCTTTAAATCTTGCAA  
AAAAGCATTCAAACCTCATCCACTCTGTCTTCTGTTAGATTCTCAGCATCACTTAACACTCCTACAGCCCATT  
CATTGCGTACATGCAAGATATCAAGCTTGCCAAATCTGGCCTTGATGAAATCTTTGAGTTGTGCAATAGTAGA  
AGGGTCAGTCACATCAAGCTTATGAAAAATAACATAATTAGAGAGGCCCACTCCTTTAATATATCAATAGC  
TTCTGCTCCTTTCTTCTCATCTCTAGCTGTTAAGATCACCCTATCCCTTTTGAGGCTAGCTGTCTACATATTCT  
AGTCCTATTCTTTGTTGGCTCCAGTTACAACCTGCAATCCTGATAACAAATTTGAAACCATACTAAATATAATT  
AATGCCCATCTTACTCGCACAAAGAGTG

>TCONS\_00071868

TACATTTAAAGGTACATTTTATTACACTTTTTTAAGTAATGGTTGACTTATAAGGCATTTTAGGTAGGCTTCATT  
TCTTGACGTGAGGGAAACTCCAAGTTATGAAGGAAGTTGCATTGCGTGGTCCCCTACTTTTGACTTTCTTCTGC  
AGTTTATCTTCATTACTTCCCTGTAATCTTCATTGTGCAGCAAGTGGTTGCTTACTGAAAATTCGGTTTAGAACT  
TCGGCCAAGCGGATCCCCTTTGCGCTAACCTCTTCTCCACTACAGGAAGCCGAGAAAGGAAGTAATCGTCT  
CCCAAAGTGCTTCCCGGAGTTGCATTTCTGTAGGCAAATTTGCAGGCCAAACGGACACTTTCAGAAGCATAC  
GGGTCAGGACAGACCCTTCTTGAATTTTCCCAAGATGGAACATCATCGGACCATTTCATCAGTGATGTTTC  
TCAGAAGAGCTTGTATCATTAAACGTGAGGTCAGATTTGTAGTATGTCTTCAATGCGGATTCAATAATCATGGT  
ATCCCATACATGATGCAAATTAGTCTTCTCCTGTACCAACGGACTACTATAGTGTTCACCAACATCTCCA  
GTGAAACCAACATGTAGAGGCTGATGTACATCACCAACAAAATGAGACAAGAACATAAGCGCTTCAGTCAA  
GTTGTATTTTTCTGAATTCAAATCATAGTATCCCTGTGAAAGTTGCATTGAGTAGTTGTATATTGCTCCTGTAAC

GCACCTGTCCTTGTGTCCATGCCCCGTCATGGCAGTCTCGGCAATATTTGTAATTGCACAAGAAATCAGGTGTA  
TCAACATAATGTAATGGAGAACTCCAGCGGTAGTACGGGTAGTGGTGCTTAACCTCATCAGCCCAGGAGCAG  
ACAGCTGCAAGATCACCTTCAGCTTGATCTGGGAGTAACTCTTTGACTGCAGCCAAAGCATCTTCTGTTAGAT  
ATTCCTCAGCAATTTTGCAGATAACATAGTGTCTTCTTTTCCCCAACCAAGAATCTTTGGAACCATCATTAGT  
ATAACAGTTACTCTTACAAACCATATTAGCTCAAA

>TCONS\_00071876

GGGGATTTCTTGCAGGTAGAAGCTCTCAGCTGTCACTCAAGGGATCTGTTGCATTACATTGTTTTGTTAATTGT  
AATTTAAACATATTTATTACATCAAGATGAACTTTGAAGTTTGCTTTCCTGCGAATTCAGATTATGATTGGTGG  
GGATTGTAAGAGATGGTAATGGTATTGTCTGTGGAATTTAATATCTGGCCTTCTGTGTTTCCATACAAGCTGT  
AAGTGCTGCCATTTAGTTCATCAACTTTACTTTAGGTGTTAAAGATGCCTTTTCATTCATGCAGGATTTTTTCAT  
CTACTCTAGTTAGGTATGGCATTGACAAAGCCTGTCTTTAATTTCTTCCACGAACATAAAGGGTTTTGTCTT  
TCTCTTCATTGATCAGGTAGTGCTTTTGTCTTGATGTCTTGCTGCTGCAAGTGAATGGTGTAAATTTGAGATAG  
AGGATGCAAAAAGAACTGAGAATGGCTTTGAAACTATAAGTCACCAATAACAGCTGTAGATAGCAATGAA  
TGAAACAGACATAGCAGAGGACCAAGAGGTTGGAAAGGAAGGAAGGCATCTAGA

>TCONS\_00071905

GATAATCCGTCTATGCCCCATCTGGCTGGACAAAAGGATTGGATATCTCATCTGTACCATCAGTTGGAGCGAC  
AAGCATTACTGCCGTACCCCTGCAGACTATTAAGCCAAGAGCTCGTGTCTGCTCGGTAGTCTTCAGGGGATCA  
TCAGCATCTCTAAGGTACTCCTTGGCTTCATCCAAGACAAGATTTAGCAGCTGATCATAGCCTTTAAGTGTCC  
CTTCCACTTGTCTTCCACCTGTAAGCTTGACCTGCACACCCTTGTGCGACAAATTTGCCAAATCTAAAACAGTT  
TCTTTTCTGCCAGACTGAAACAACACAAACACGAAATTGTATAAAGCAACTATCGCAATTAAGAAAG

>TCONS\_00071924

CTAACTCCTGCATCCAGCTTTTTACGCCGCTCTTCATATGATGGCTCAGTTGGTCGAGACAGTAGAGGAGTGT  
AGGAAGCTTCTTTCTTCTTAGTACGCTCACTTGATATATTGTCATCAATTTCAACAGAAGTGCTTATGATAGCT  
TCATGAAAAATTGCGGCTTGAAGTTTATAACTTCGGCATTCCTCGCTCCAAATGTTTCATTCAAAGCTTGCTTTGC  
ATCTGATGAACAAATAAATTTGAGACCTTCGAATTCACATGATTGAAGAACTAGAGGTATCTCTGGAGCCATT  
AGAACTGAGGTTTTCGTGGTGTTCTTTCAATATCTAGAAGTGCATCTATTACATTAGGGGTTTCAAGACCCT  
GGCCAATCAGAAATAGTACAGCAACCATGCACCGGATTTGATGCCAAAGGAAAGCACTACCTTTGATTTTCA  
TAATCATGAGTTGATCAGCTTTGTAACCTTTCAATTAAGGGGAGAATTTCAAATGATACTATGTGCCTCCGGTA  
GTTGTGCACATTGCCTGCATCCATTTTGCAAAAATTTCTGAAATCATGTTCCCCTAAAAATTTCTCAGCGGCAG  
TTTCCATTGCTGTTATATTCAAATTTCCCATGCCAAAAGAAGTACTTGACACCCTGCTCAAACAACTGAACCTT  
GCACTGAAACCAACTGGAATAGGAGACCAGCCATAATGCGAATGTCATTTGGCAGAACTTGATTTAGTACC  
CTCACATAGTCCATTTCTCCTGGGTGAAGAAAATTTAAT

>TCONS\_00071928

CCTTTTGATGATGCCTCCAGCCTAAGAACAGAAGACCAGACGAACAAGATAGAGATTGAACATTCTATTATT  
TTCTGTTGCATCAAATTTTTTCATGTTTTCTTGACAGCTTTTCAATTATTGAACCAAAGTTCAAGAAAGTCAGGTT  
TCCGCATTTCAGGAGGTAAAATGTAATCAATCATCTCATACTTATCAATCCCTTGTCTGCTTTTGCTTGTAGTA  
ATCTCGCGTAATTTGCCATGATTCCCAC

>TCONS\_00071965

TAACCTGGCTAAGGCAATGAAGGAGCCAACGTCCTTTGTTTCAAGAAGAAGACGGGTTTTCTTGGCGAAGC  
TCCTTAATTACAGCAGCCAATGCCTCAGGGTTAAACCCAAATCGCAGAGAGCAATTAGAACAGAAAGAGT  
GTGACGATCGAGGCCTGTGTCCAGAATATTTGACATATGAAATACCAACTCTAGAGAATCACGTGCTGTACG

TGCAGCCTCCGGATCCATTTTCGACAGTTTGGGAATTTGCTTCCTTTCAGTGAATCGAGGATAAGAAGGTTGCT  
GCTTCAAAATAGCTGCACTGC

>TCONS\_00072056

TCTCTGTCCTTTTCCTCATAATAACAAAACCTCTCAGATTCACAAAATCAGAGGAGGATTAGGACGAGGACG  
AAGAGCAAAACTCGCCAATTCTATGTGCGAAATTCGCTGAAACGCGTGATTTCGTAAAATCAACAATCGGCGAT  
CCATCTTTCATCGACAAGGCGTTTAAGAAAACTCAAATCCACTATTTTGGTTGAATTTCCGTATATATTTTAA  
TAATTTGTAGAGAAATTAAGGTGTAAGGATCTCAA

>TCONS\_00072115

TCAACTACTCATGATCTTTAACCMAAAATATAAAAGGGAAAAAGAGTAGTTGCAATTTAAAGATTGACATCA  
ATTTAGTATCTTTGAACTCTTTGCAATAATTCTCATATATCTTCCTTTCACCTTTCCAACCTTCACAACACTTTGA  
GCTTAAGTGATTCTGCCTTTTGGTCACATCAGAGTTGGTGGATTTCGAGATATTGCCTATTCAGATTGATTCTTG  
AGGACTTTTCCTTCACCTCAAAGTTTAATTATTCACAAGGCAAGTATATTTCACTTTATATCCATACATAAAAT  
ATTAAGTAAATGAATAATTGTGCATTAATTTGATTCTTTTC

>TCONS\_00072127

TGCCTACAAGCAATTATCAAAATCTGGTTGTTTAACAATCAAAAATGTTCCAATCGCATCTTCAAAAACAAGC  
TAAACGCTCTCTAAAGAGAAATCCATATGTTTACTACAAAGACTAATTCAATGCTTGGTCACACTCAGTGAGA  
CTTCACATATTCCTGAACAATGTGGAGTCCTTCTGTTTCCTCTCCAAAATCCTTTACGACAACACAACCGCAAC  
CAACAACCTTTCCTTGCTTTGCCTTCTGAATCAATCTTGCACAGACCAGCCCATTCGCCGAGGGTCTTGGCACTA  
GGAAGTGTGATCAGGTTAACATTGTGATCAGCACATAGCGCTTTGACCAATTTACATAGTCTGGTTGGTCGC  
AGTCCTCTGCCAATACACAGAGTTGGGCAGCATGCTTCTCGATAACCTTTGCACCCTCATGAAGACCTTTAGC  
TAACCCGCCATGAGCCCGTGATTTTCTGAGGACAAGTTGCAATGCCGTCATGATATCCATGGGCTCACCAAG  
AGCGGGAGCGGGAGCTGGGGTCTCAGCAACAACAGCCTCTTCACTGCATTACATTAATCAAGGAATAAAC  
AAAATGACATGGAAATGAGAAGATAACCATTTAAATCGAGAGCTTCTAAATAATAAGAGAAATGTCATCAA  
GTAAAGATGGTTAGAAAAGGCGAATACAAGACAATCAAAATGATAAAACATGAAAAGATGGGAGGGGGCT  
TTATTTCTAAATCAACTCTACAATCCATGACATACAAAGCAACAAAAACCAAAAAGAATGCGGTATCTTTA  
CTAAAAAGAGAACTGATATGGCTTGTTTCATGTTAACCAATGCAAGTTACCCAATTT

>TCONS\_00072128

TGCCTACAAGCAATTATCAAAATCTGGTTGTTTAACAATCAAAAATGTTCCAATCGCATCTTCAAAAACAAGC  
TAAACGCTCTCTAAAGAGAAATCCATATGTTTACTACAAAGACTAATTCAATGCTTGGTCACACTCAGTGAGA  
CTTCACATATTCCTGAACAATGTGGAGTCCTTCTGTTTCCTCTCCAAAATCCTTTACGACAACACAACCGCAAC  
CAACAACCTTTCCTTGCTTTGCCTTCTGAATCAATCTTGCACAGACCAGCCCATTCGCCGAGGGTCTTGGCACTA  
GGAAGTGTGATCAGGTTAACATTGTGATCAGCACATAGCGCTTTGACCAATTTACATAGTCTGGTTGGTCGC  
AGTCCTCTGCCAATACACAGAGTTGGGCAGCATGCTTCTCGATAACCTTTGCACCCTCATGAAGACCTTTAGC  
TAACCCGCCATGAGCCCGTGATTTTCTGAGGACAAGTTGCAATGCCGTCATGATATCCATGGGCTCACCAAG  
AGCGGGAGCGGGAGCTGGGGTCTCAGCAACAACAGCCTCTTACCAGACATTTTCTCTTCTTGATCTAGTTC  
AAG

>TCONS\_00072150

CTGGACTCTTGTGTAGCTCTTAGGGCATCAGCATCTGCAGTGACTCCACCAATTCCTGCATTGTTACCAAGAT  
ATCAAGCCTGCCAAATTGGATCTTAATGAATTCAGCCAAAGAAGCAATAGTGGAAGGATCCATAACATCAA  
GCTGCTGAAACACCACATTTTCTTTAGCCAAACCAGTTAACCTCTGAGCTTCTCCACAGCTTCAAGCCCTCTC  
GTCTCATTTCTAGC

>TCONS\_00072213

GTTAATATTCTTTTGGTGGTAGTGTTGGCAAATGAGGGGCCATATGCTATGGTTGTGGCTACAAATTCTCCAG  
TTTTGCATGTCTACTCTTTCCTTCACCAATCACTACATCCAATTCAGTAAGGACCCCTCTTCCCTTTAGCCAA  
ATCCACTTCCTCTAACCCCACTCCCTTCCCTCCTACTCTCTGTACTCTGTAGCAAAGGTAAGTCTTTTTTC  
CTTTACTGTTATTGACTTAATTCCCTCATATCTATCTTTCTTGTTCGAAGATTAAGTTTTCTAGTTGCTTTGCTTA  
TTTTTTCATGTGGGGTGTTCATCAAATTCCAAGATTGCAGCTTTATTATTATCACCTCATTTTTTTTCATTAGTGGT  
GCCTCTTTGTTGCTGAAACTGAGGTTTTCTCTGCTTACTTAGCTTTATTTTGATTGGTTTCATGTGGGTG

>TCONS\_00072324

CTCTTTCTGCTTTTAAGTGATTGCAATCTTTTGAATATCGTAGATTTATCATAAATAACTAATGGTTGCACTCTC  
TTTGACCACAAACAGGAAAATTTGGAGCTATTCTTGCTTCAATACCTCTACCGATCATTGGAGCTTTATATTGC  
GTCTTGTTTGCCCTCATGTCAATGTTGATGTTGCTGGATAACACTTGATGAATTTAAATTGCTTTTGGGATTGAA  
GCTACAAGTCAAGATGAAAGTTTAGAAGAAACACAACCTTCATTATTATTTTGCTAGGAATGTTATGTAAAC  
ATGATATCATAGCCTAGCTCAGGATGTTAGCTATGTTTTTTT

>TCONS\_00072335

GTGCATATATACCGAAATCCTCTAACAAGAATACAACATGACCCTCAAGATACAATCGCAAATGTTTCGATAG  
TCATTATAATGTACATTACAAGATGGCCAAAAAGCTCATAAGCTTCCGAAGAATGCTGCATATTGTCGCAGA  
ATCCAAC TGCCACATTCCCGCACCACGCTGAGGAATTTGTACAGAGCAAGAGGCAGAAACTGTCCGTCCAAC  
TATACATGTTTAATACATTGGATACCAAAACATTCCCTTAATACCCTCTGGATCAGGTTCAAAACCTAGATTCT  
TATAGAATTCCACAACCTTGACTATCCGCGAACAATGAAATATTTCCAATGTCTCTTTGGAGAAGGGTCTTAT  
CAGTTTCTCAATAAGAGCTTTTCCAAGTCCTTGTCCTGATAGGAAGGATCAACAAGAACATCCCAAATTGTT  
GCATTGAAAGCATGATCTGATGTTGCACGAGCCATGCCTATCAGCTTCTTTTCTCCATTTCGCTCTTCTCCTGA  
AGAGAACTTCTGGAATGCAAAGTTGCAACTATATAGCTATTTTAAAGAGCAGCAGCTAGCTTAGACAATGG  
CCTTCGAGGCCATCCAACCTTATCACATAAAGCTTGGAGATCATAACATCAACATCTCCGCCAGAAGAGAA  
TATAATCTGTTCAACTGTTCCATCTGGTTGAGTCTTTTCAATTAGAACAAATTCCTCAGGCAAAGGCTCTTCTT  
CCTCTTCTTCTTCATTGGATGGTGATTCTATAACCTTTATGGTGTTATTCTTAACAAACCCGGATCTGATGGATT  
CCCAAAGCCAGCCTTCAAGTTAGAAACCTTTGATTGCCTCTTAACCTTTCACAAAACCCAAATTAGTCTTGCA  
GGTAAATGGCAATGGATTTGAAAATTGACAACGGCAGCAATTAA

>TCONS\_00072336

CCTCTAACAAGAATACAACATGACCCTCAAGATACAATCGCAAATGTTTCGATAGTCATTATAATGTACATTA  
CAAGATGGCCAAAAAGCTCATAAGCTTCCGAAGAATGCTGCATATTGTCGCAGAATCCAAC TGCCACATTCC  
CGCACCACGCTGAGGAATTTGTACAGAGCAAGAGGCAGAAACTGTCCGTCCAAC TATACATGTTTAATACAT  
TGGATACCAAAACATTCCCTTAATACCCTCTGGATCAGGTTCAAAACCTAGATTCTTATAGAATTCCACAAC T  
TGACTATCCGCGAACAATGAAATATTTCCAATGTCTCTTTGGAGAAGGGTCTTATCAGTTTCTCAATAAGAG  
CTTTTCCAAGTCCTTGTCCTGATAGGAAGGATCAACAAGAACATCCCAAATTGTTGCATTGAAAGCATGATC  
TGATGTTGCACGAGCCATGCCTATCAGCTTCTTTTCTCCATTTCGCTCTGCCAAGTAACTTCTCCTGAAGAGAA  
CTTCTGGAATGCAAAGTTGCAACTATATAGCTATTTTAAAGAGCAGCAGCTAGCTTAGACAATGGCCTTCGA  
GGCCATCCAACCTTATCACATAAAGCTTGGAGATCATAACATCAACATCTCCGCCAGAAGAGAA TATAATC  
TGTTCAACTGTTCCATCTGGTTGAGTCTTTTCAATTAGAACAAATTCCTCAGGCAAAGGCTCTTCTTCTCTTCT  
TCTTCATTGGATGGTGATTCTATAACCTTTATGGTGTTATTCTTAACAAACCCGGATCTGATGGATTCCCAA  
GCCAGCCTTCAAGTTAGAAACCTTTGATTGCCTCTTAACCTTTCACAAAACCCAAATTAGTCTTGCAGGTAAAT  
GGCAATGGATTTGAAAATTGACAACGGCAGCAATTAA

>TCONS\_00072350

CTTTGGATTTGAGACAATAACTCCAAAAGCACTAAAAGTGTTCATATAGAAGCTTCTCATCAACATCAGGATC  
AAGGTTCCCAACAAACAAGTTGGCACCAACATCAACACTCTTTTTATCTTGTGATGCCTTATTCACCTCTTATTG  
GTTTCCCATAAAGTTTAATCATATTACAGTACCTTTATTGCATAGTCAGCATCTTCTTCACTTCGGAATCCACA  
AAGCCATATCCCTGATGAGCATTAGTAACTCTGTCCTTAGGGACATAAACATTGACTACTGGACCTGCTTGAA  
CAAACAACCTCCCATAACTCTTCAGAAACCTGAGGGTCGAGGTTGCCGACATAGGCGGTGGCGTCTTGGT  
TGCGCTCCGCTGCGTGTGGCCAGCAGGTTTGCTCCCACTCCCGGAGCTATACGAGTCGTCATACTCAGAAA  
GAAGAATGCTC

>TCONS\_00072371

TTCTTCTTCTCTTTCTTCTCCTGTGAAGAGCTTATAACCTCCATAGAAAGCCAAACCCCAACCAGTAAGAG  
AGACGATCACGAAATGCTCTTCTTTCCATTTTGATGGGCTCATTGGGTCCTGCCAAAAGTTCACCTTTGGAGG  
ACCATGATGGTCACCGCCGCCAGCCAGACCGCGCCGCTGGATAAGGAGGGCGCCTTGGCTCG

>TCONS\_00072434

TTGAAATGTCTACACCATTCATTACCCGCAGGTACCTCGCAGGTCTCACCCCCAAGGGCTAGGAGAAAAG  
CTCTTTCATTTGACTACCTTAACAGAGGGACAAATGGCATTGAACGTGAATTTGTGAGAGCACTTCCTGATGC  
TATTTTCATTACAGTTAGGGTTGCTAGCTCGCTGCATGTTTTATGACTAGCACTTCCTCTCTGAGTTTATCACCT  
CTATCTTTACTAGTCTCTCCTTTCCATGGGATGCTGGACCATTACCTGTAGAAATCTTA

>TCONS\_00072564

ATTTCTGGCTACTCAACAGTCTGCACATTCTTGAAGCAGATCATTCAATTCGGATCTAACTTGTAGGAAACATC  
ATCTTCTTCGTAGTTGTTGACTCGTTCACACTCGTCAATCCATTCACTATATATATCAATAGGCTCTGTAGTGC  
TGTGACAGTGGTGCTGAAGCTCTTGGCAGATCCTGCAATTTGCCCTCGCCAATCAAGTTTTTCATATCAATGC  
GACACTCCACGCTGGTGCCATGACTACAGAAAGGACAGCTGAAAACAGTGTCAAGTTTGTCCATCCTCTTCTT  
TGGAGGTGGCTTTGATTTTGACTTCCTCTTTCCCATAGCTCAAGTTACTGAAATCGATTGAACAGCTGAGATAA  
AAATCGCCTTTTTGTGATCGCTGTCGACTCGAAACCCTTGAC

>TCONS\_00072566

GACAGGTACAAAAGTGTAAGCTCTTGGTGTGCTCGGAGCTAAAATGGACAAAAGTGTGTTCTTTCCTGC  
AAAGAAGAAGCCGGGGATGGCTCATTGAGCTCAGCTTTCCATTCGCGCAGCATCTGGTGGACTTGCTCTTCAA  
GCAACCCAACATCATAACTTCGGCTTTCTTTCCTCGCAGATTGTAGATTAGTTAAAACACCCTGCAGATCATC  
GACACGGTTCTTTGCCTTGTCTTGAAGAGCTGGTGCGATGCAGACTTGCACGCACCCCTCTTCGAAACCTTC  
CTCATCCAATCAAACAGAACAAATACCCTCAACTCCTCACCTTCAAAATAAGCAAGAAAACCTCGATCCT

>TCONS\_00072594

TAGAGCAAATGATTTCTATCACCAACTTATGGAAGCTCTGGAAAGCAAAATCTTCAAATGAACTAATTTCTAC  
AAAATCTTAACATAACAAGGAGAGAACTGTTTAGAAGATGCTAATATACACAGAAGGCCAAAAGAATGGCA  
ACCTGGAATGACAAAAGCATAACCAAAGCTTGCTATTATTTGCATCATAGCATAGGGCCAGAGTAACGGTG  
CTCGATGAAGCCCTTGAATCTTCAAATTCATCGCGCATCCAGTCCTGGGCACACATCAAAGCTTGCAAGGTAT  
CTGATCTTAGCGAACTGCGATACTGTTCAAGAGCTTTATTCCCAGTGTTGAATACAACTCTAATGAAGCTTTT  
GACATAGGCATTCCAAGAATATTCCGTGCCATCATGGACAGAATAGGATACCTTGGAGTGTGAACCTTCCAC  
CAGTTTAAATATGCTAAAATCGGCTTTTCTCGGGAAAAGCGGCTCTTCCAAGTATTTATCTAAATCTGATTTTAT  
GTTGTTGCTCTGTGAAGTCTCATATATGAATTTGTCGTACCCTGTCAGCCGATCATTATTAGCACCAGCACCAG  
CACCACCAACTTGAGATGCTTCAGCTTGACCGTTAGGAGCTAATGGTGAGTAAATAGCATGGCCATTATACA  
AAGCCTTCATACAATCTGAGACAATATTAATACAGTCTGGAGCACTATCACCATATATTTGAGGATAATAGTA  
TTCAACCAATTTTCATCTTGTATCTTGGGTCTAAGATAGCTGCAATTGCCAAAGCCAAGCTACATTTTTTCCAGT  
ACTCATCAAATCGGCTTTTCAACTTTAGAGCCAAAGAATTAACAAAATCATCCGAGTTTTGACACCACTCAAT



CAACTGCAAATGAATATCACAGATCTCTGGAAAGTATGTATTTGCAGTAGGATACTTGCTTCCTGCAAAAACA  
CTGGAAACTTCAACAAAGAGCTTTAGGAAGCTAGCAATGGCACTTATTCTATCCCACTCTGTGGCAGATGGA  
CACATTCCATACCCAGAATCATGTTCTTGCAAAAGGGGAAATGCATCTTTGTACTCCAAAGCAGTTTCAATCA  
TGATATATGTTGTGTTCCAATAAAATGAATTATCAAGATTCAAGCACTTCTGGCAATCAACCCCAACAATTTG  
AGCCATCTCAGTGAACCTTTTCTGGTTTGCCTGTGAACCTTCGAACATACCGAATACTTTCCCGGACCTTGTGGA  
TTATCGGGCTTGCTGTTTCTAAGGTATCTTGACCATCAACTTGACAACATTAGCTGCACAGCGTGTATCAAAT  
AATTGACCGTCACAGTAAAGAAACCTGTGCTGGCAAAGCTGCTCTCTGATTCTACTTACAATTTTGTTCATATGT  
CGAGTAGTTATCAAATGTCACAGAAAACAATTTCTGTCAATATCCCAATTTCTTAGACTAGTCATGATAACT  
TCTGAAAGCATGTCTTCTGTTTGGGAAGGATCAGTTGTTAAAAAATTCAGAATCTTCTTTTTCAGTTGCCAAGA  
GTCATCTATGTAATGTGCTGTCAAACACAAGTATTCAGCATCGCCATTAGCAGTCCATGTATCAGCACTAAGG  
CTGATTTTCCCAGGCAATTTGTCCAATTCTTCATATACTTTCTGTCTCTCCATCAGATAAATTTCCCTGCAGTCA  
GCCTCAACTCCATCAAATGTTGCAATGTCAAATAAAGGTTGAAGATTTCTGACAAATATACGGAAACCAATA  
TGTTCAACCATAGACAAAGGATAGCCATGTAATATGATCATGCGAGCAAGATCAAGCCGGCTTCGCCTATTA  
TCAAAGTTAATCCCATTGTTGAGTAACCCATCTCTTGTGTGCCCTTGTTCAAACCTTAGTCCTCACAATGCTGAC  
TGCTTCAGCCTTCCTCTGCTCTTGATCAAACTAAAATTCGAGATGGCAAGGGTTCCTCTCTTTTCTTTCCCCG  
TGTAAGCAACTGACTTATGTCATGGTTTGATCTCCTACGACATCTGATCAAATGATTTCTTAAATGTGAAGTCC  
CACTGGTGCTAGACCCACTAAGTTTCCTTTTACAGTGCCTACAGATAGCCACAAAAGTATCACCTTTTTTTACT  
CTATCAAAATCATTCCACACAACAGATTTTAGTCTACTAGAATTGACTATAACTGCTTCCTCAGCTATCTCCAT  
TGCTTCCGACTGTAGCAATACCTGAGA

>TCONS\_00072636

CTGGAAACAAAGTGTTGCCTTTACTTCCTTCTCCAAACATATTCTCATAAACTGGAAATCTCAGAGAAGTAG  
CGGCAGATCTGAAGGAGCGATTATTAGTAAGAAGAAAGAGTGGAGAAGAGGAAGAAAGGGAGAGAAAAG  
ATGGGAGAGAAGTGGGGGAGAGGTATAGGAAGAAGCATAATAATAAACAGTAGATGGAGAGAAGTGGT  
GGTGGTGTAATAGTTGTGGGGAAAGGTTTCGGTTAAGAAAAACGATTCCATTTCGTTGGCTTTGGCGTCGGAAT  
TGGTGTGGTGATGCAAATCACAAGACTCGTTGAAGAAATCTTGCCCTTTTCTTGCCTTGTTAGTACTCTCTCT  
CTCACTTTCTCTTTCATAATACTCTGTCTTTGGCAGCTTCTTTTTCGTTTTCC

>TCONS\_00072728

ATCTTAAGGCCACCATCGGGGTTGACTGAGAGGATGTTGGCATCAAGGACTGCAAGTATTTTGCTGATTCTGT  
CAGCAATTTCTACTGTTGATTCAATGTTTGGCGAATGGATGCGTATAATCCAACACCGTACTTCACTCCCCCGC  
GGAACACAGAAAGAAGCTTCTCATCAGACCTGGATTCTCGATGGTGATCACGCTAGCATCCATGTCCTTAAT  
GGAATCGCTCACGTCATTGAAGTTTGAATAGCACATGTGAGTGTGAATCTCTTTCTCTAATAATTCCAGCAATT  
GATTTATTTTCCCCAGTTTCCAAAACCCAC

>TCONS\_00072737

CCTTGAGAATGTATATCCATGGCTCCTCAGATAGCCATGAGATCACCATACTGGCGCATCAAAATGATGGAA  
CCAGCAAAGAGTGCTGAAGCTCGAAGCAGTTTCATGTTGAGATTCCACTTTTCTTCATCATGAACCTGAGAAT  
TCCAGAAAGCTTTGACTTTGTCCAACGATATCACTGAATCCGCCATTGAATTGAAGATG

>TCONS\_00072831

CAAAATAGTGTGCATGATAAATAGACTCAATTGTATAATTTGAAGATCATACTACAATAGAGCTCAAAAG  
ATGGCAAAAGTTCAATCAAGAATTAGTATCAGCTGGTTGATCAAAAGGCTTGTTAGAGCTTCCTTGTTCCATT  
TTAATCTGTCTCCATCTATCATTACAGAACCTGAATTTCCACCCATCAAGCTTGTTGATTCTGCAAATGTGCA  
CTCTACTTCTCTTAGGCGCTCCTCTGTTTTCATGTCTTCCT

>TCONS\_00072913

TTTTGTGCTGCTTCTTTGCCCAATTTTGGTATTTCAACCACCACTATATCTTGCCTAGCATCAAGAGAAGGAGC  
CATGTATTCAGATATATTGGGATTCTCTTTTAGAATTTCTCTGTAAAGTGCATGTACCTTTTCTTAATCATTGA  
TTTGTACACATGCGCTTAAATTTCTCCTTAAGCTTAGTCATATGCTCGCTATTAGTGA CT CGAAAATAATAAT  
CAGGATAAGTGCTTTGATCAACACAGTTCGAAGGAGTGGCTGTGCCGATGGCCATGATGGTGGCCGGTCCCT  
TAGCACGCTGTGCCCTTCGAACCTCCTCGACGGTGACCATTTTCGCTGGAAAAATGGTGTTTTTTACTAAGAT  
>TCONS\_00072914

TTTTGTGCTGCTTCTTTGCCCAATTTTGGTATTTCAACCACCACTATATCTTGCCTAGCATCAAGAGAAGGAGC  
CATGTATTCAGATATATTGGGATTCTCTTTTAGAATTTCTCTGTAAAGTGCATGTACCTTTTCTTAATCATTGA  
TTTGTACACATGCGCTTAAATTTCTCCTTAAGCTTAGTCATATGCTCGCTATTAGTGA CT CGAAAATAATAAT  
CAGGATAAGTGCTTTGATCAACACAGTTCGAAGGAGTGGCTGTGCCGATGGCCATGATGGTGGCCGGTCCCT  
TAGCACGCACTATATCTTGCCTAGCATCA  
>TCONS\_00072965

TATGATGCACACAAAACCCAGGTCCTGCCCTTTTTCTATCATCATCATGAGGACCAAGTGGTGCTTCTCTTTCT  
CCACTGTCCAATTTTGATCCAGAATCATATACTAATCCGCGAGGTGGCTTGTCAAGTGGCCGTGATGCTTGAT  
CATGAGGCACTGGTAAAGGACTTAAATGCTCTCCCATAGGCGCCTTCAACCTTTTATTCTAGCTGATTCCAT  
ACTTCTAGATTGTCCAAATGGAACCTTTTCATAAGACCCTGGTGAAAACGGATTGGTTGATTTCATCAAAA  
CGATTACTTTGATTTTGAAACATTTTCAGATTCTGCTGGATTAACCAAGTGTGTGTTCCACTGGGAATTTTCAGG  
ACCACTTAATGGTGCTCTTCC  
>TCONS\_00072966

CCTCCCCATCAGGATTTGGGGCAGACAAATAACCCATATGATGCACACAAAACCCAGGTCCTGCCCTTTTTCT  
ATCATCATCATGAGGACCAAGTGGTGCTTCTCTTTCTCCACTGTCCTTGAAATGCATCGAATCAGGAGGATGA  
TATGGTGGCAATTTTGATCCAGAATCATATACTAATCCGCGAGGTGGCTTGTCAAGTGGCCGTGATGCTTGAT  
CATGAGGCACTGGTAAAGGACTTAAATGCTCTCCCATAGGCGCCTTCAACCTTTTATTCTAGCTGATTCCAT  
ACTTCTAGATTGTCCAAATGGAACCTTTTCATAAGACCCTGGTGAAAACGGATTGGTTGATTTCATCAAAA  
CGATTACTTTGATTTTGAAACATTTTCAGATTCTGCTGGATTAACCAAGTGTGTGTTCCACTGGGAATTTTCAGG  
ACCACTTAATGGTGCTCTTCC  
>TCONS\_00073001

AGAACAATACTTCTAGTAGAATAATATAGCTGCATTTGCCATTGCCTCTACTATCATTATTCTGGTTTGCTTTCT  
TCCTTCTCTTTTGGTTTGGCTTCTTCCACCTTCTTTTCTTAGGTTTAGCTTCTTCCACCTTCTTATCTTTAGGTTG  
GCTTCTTCCACTTTAGCTTTTGGTTTGCCTTTCTGTGGCTTCATGAAGCAGAAACAAGAACAACATGGACATTG  
GAACAAGAACTTCATTCTCTCTCTTTCTCTTTCTCTCT  
>TCONS\_00073002

GGGACTAATTTAATCTTAATACTACTAGTGCTACTGCTTCAAGACAGAGAGAGAATGAAGTTCTTGTTCCAATGT  
CCATGTTGTTCTTGTTTCTGCTTCATGAAGCCACAGAAAAGGCAAACCAAAAAGCTAAAGTGGAAGAAGCCAAA  
CCTAAAGATAAGAAGGTGGAAGAAGCTAAACCTAAGGAAAAGAAGGTGGAAGAAGCCAAACCAAAAAGAG  
AAGGAAGAAAGCAAACCAGAATAATGATAGTAGAGGCAATGGCAAATGCAGCTATATTATTCTACTAGAAG  
TATTGTTCTTCATTT  
>TCONS\_00073050

TTGCTCCCTGGAAAGCATCATAATACACGCCTTTATGTACATGTACAAGAATCCTTGAGGCAAAAAGTGGTTAC  
AAATTTATTGGTTTACATAAGATGCCAGTTTATTTTCAATGAAATTCCTTATACTAGTTGCATCACCCTGCCG  
GACAATTCTTCCATCTTCCATGTAACTGCACCATCTGCATACTCAAGTTCTTCCAAGCGATGGGTCACCCAC  
AAAGCTGTAATTTCTTTAGATGTATCCATGGAGTTTCTCACTGCTTTTATTACTCCAATCTGATCAGTTTCATCC

>TCONS 00073151

>TCONS 00073197

>TCONS 00073198

>TCONS 00073301

CATTATATTCCGAAAGAAATAATAAATGGACTAATTGTTTAGGGCATTTTGCCATATTTGAGGGCGTTGAGAT  
CAGCATAGTACTTTGTTATCCATCCTTCAATGATTTCAACCTCTGTTTTCTTTGCATGGTTAACCATTTCTGGAT  
CAGTTGGCTTGCTAGTAAGAATGTCTAGACAATGGGAACCGTTACGCGTGTGGACAGCTCGTAGACTATGAG  
ATATGTCCTTGCAAAACCCCTGCACTACTGTAAGGATCTCTTAGCCCATTAGAGAAAATGATGTTGCTAGCAAA  
CCTATGAAGAATTAATTTTATGTCATGTCCACCATAATAAGTTGTGATCCAGTGTGGACGAGGAGAGACACC  
ATAGTTGCTCTTGCAAGTCGTCTATAAACTCATCAAATTAAGGAGCTGAATAGAACATTGTATCATTTTTG  
CCTCGCCCTATAGGCATCACCATCTCACTGCATGTTTGCCATCTCCATCCCATGTTGGTTTCACTAGGTTGATT  
ATACACATTTGTGTTGTAACAACCTTAAATTCCTTGAGATGCAACAATTCCAGCATAAATACGATCAAGAACA  
TGACTTCCTTTGTGTGCACCATCAATTCCTCCACAAACCACTGTCACTGGATATGTTGGTGGCTTATTATACTG  
AGCTGCTGTTGCATATATTGAATCCAAATAATCCTTCAACTCAGAAG

>TCONS\_00073378

CAAGCTTCTGATTTCTGTAAGGTTGGGGGAGGGGGTTATTTAAAACAAACCAAGACTTTGAATTCACATCATC  
TTTAAAAAACTAATCGGTTAAGGAAGTAATGACTCATATCAAGTTACAGTAACGATTAAGTTCAACCGAGCT  
GGGTCCTAAAGTTGAACAACCTACATTTACCCGAGTCCATACCACCTTGAAACACGCATAAAGTAGGTCCAC  
CGAAACAGAAAAGACGACTCAAAGAATTGTGCCTCCAGTTTGATGCAACATCGCATCAATTTATCACCATC  
TTCCATCTCCAGCTCATCTGGTGTCTGTTCTGCTCTAAGACGACGACCGTCAAACAAGAAAGCAATTGAATTG  
AAATCCACCGACTGTGGTTCGCAATAAGCATTATCAGCTTCTTCAGCTGGGTGCTTCGTTTGATCCTAAAGA  
ATACTTCATTGCCATCCTGGCCTTTGACTTTGAGATTGATGTGACCAGCCTGATCGCCGGCGGGCTTCTTGTCT  
TCTTCTGCTCCCGACATTGTTGCTTCTCCTCCTCTATCTCTGCAAAAAGAAAAAAG

>TCONS\_00073395

AGGTCAAAGAAGAAGATGGGTCATCATCATAATGAAGGAAATAGACCATATGATGATCCATTCTTGGCATGT  
TGTGTTGCCCTTGTTTTGTAGTTTCTTCTACTTTCTCTGTGTTAAAGAGGTGCCTCTTTGTAGTATGTTTCCCTGT  
TTTGCAGTGCTTTGGATTGGATGAACACAGACATCAACATCATCACCACAGACATTTCTGACAACCCCAATTT  
AAAGGAAAACACTGATTTTTGAGTCT

>TCONS\_00073420

CTATCATCTGAAGTGAAGAGTTGATAACTTCACTTGTCCAAGTCAGGATTCTTACACTAGGGCTTCAACATCG  
TCTGGGTTACGGTAGCTCCATCTTCAGTGTCTTCTGACCTCAACTGAGCAGAAATGCCATCAATAGAAGAAT  
TAATCTGTTCAATCTTCTTTGCAAGTATCTTGCGTTGTTTCTCCAATTCCTTTTCTTCATCATATATAAACTTGGG  
CAATTTTTTTCATGATGTCCTCCTTATCTGTTCCAGATATTGCCTTACTGATCTGAGGTGCATAGACACAACCAA  
GTGTGCCAACAAATTAATCCTCCCAAAACAAAGCCACCAATAAAGAAGCCACCATTGCTTGGCCTTCCACCAT  
CACTATATCTCGCTTGAATCAATGATCTTCCAGATGAGGATGGTTTTGCTCCACGCCTAGCACTGAAGAACAG  
CTTGGTGGAACAGCCACTTTCGTCAATTGATTTCAAAGGAGAGCCAGATGATAAATGGAGAGAAGGGCTTTT  
GGATATAAGCAGCGAATT

>TCONS\_00073488

CTTCAGTGGAGGTGAACAAAGCCGCTTCTCAAACCTTCTTTCTGTCCCAGGAGACGTCTTTTTTCAGCGAACATT  
CTTGAATACTTAAGGAGTTGAAGCGTGATGAATCCGCCAACACCTTACCATCTCTGGTAATTGTTTGGACAC  
GGCATGAAGTCGTTCACTTCACTGGAGATATTCTCCATGTTACTTCATCACCTCCATCATCCTGACTTTGCTTGAT  
CAGCATTCCTGGAGAAAACCTGAAGCGCTTCACAGACACGGACTTGCAAAACTCAGGCGTTATTTCTGCTTG  
ATTTTCTCCTCCCCTGAACCTGCAGTTAC

>TCONS\_00073585

CATTTACGTACATTTGAACTAGCCTAATGCATCATAAAGGATTCTCACTGATTTTTCCATTCTTGAATAGCTCTT  
AGCATCCTTGCAAGTCTCGCCACCGGAGATAAACCAACCCTGCATGGTAATGAGTATAAGCCCCTGCCACAA  
CAAGTACATGAAATAGTTGGTGGCTGTGGCCAGCAATATCAAACCTTCCCGGGCATCCATCTTTCTGGAACCTCT  
CATGGCATATACCAGTGCTCCAATGCCATAAAATATGCCCATCAAAAGTTCATATCCAGTTGTGTGAAGCGCC  
TCGGGTTGGTGCCAAAATAAAACCAGCTTGTGCAGAATAGGTACAGCACCTGAAAAGCCCATTCCAAAGAA  
TAGAGATGCTCGAATGGTTCGATATTCTGGGGTCTGGAACACAGGAAGGAGTGAACCCAAGATGGTGGCAAT  
TCCCAGGAGGGTAATAAATCCCAGGTACAGGTTGCAAAAGAAGGGGTAAACACATGAAGGAATAATAGACG  
GGAGGGTAAAATGAAGTAGATATCAGGGCAGCGATACCAGCATAGTCGAGCCTCAGCATGATGTATGATAA  
ACGCTCTGAATGGCAAGAAAGTAAATGACATGTGCTGCTTGCTAACAAGCAAAACATGGCCCCACCAAGGA  
AGGCGTAGAATGGCCAGCGTGTTATTGGTCTCACCAGCAATGGTGCTATTATATTTGCCACATCTTCCTTTACA  
CTCCGGTCCAAACATTGAGGGTCTCATTGTGAATAGTGAAAATGCTGAGTAAGGCCTGCTTCAAAGGCCATT

GGCCCGGTAATGGCCAAGAATGTATTCGTTGTCTTTCAAATAGGCAGGCAACGAATGGTACTCCACCAGCTG  
GTACTTCACCTTCTTCCATAATCTCTTCCCTTTCCCTTCCTTTGAACCACACAACCTTTTGATCTTCACAAC

>TCONS\_00073612

TTTGTCTTCTATCACCTTCCTCTCCACATCAATGTCTAAGTAAGAGTTTTTGTGAGTGTCTCACCCAAAATGA  
ATGATTTCTCTGGTATAACTCCTTCCCCCTCCCCACAAACATAAGCAGTGGATCCGTGAACAATAATCTTCACT  
TTTTACATCTTTTAGCAAACCTTGAGGACGTTGACGGCACCTAGGACATTGATATTCATGGCAGTATCATATCT  
CTCATCAAATCTAGTAGTTGCAGCTGAGTTTATGATTATGTCGATTTCTTTGA

>TCONS\_00073728

AGAAGATTGAGCTTCATTAAGGATCTCATCAGCTTTTTCTCTACCATTTCCTATCTGCAATTGCAATTGATC  
TTCCATATAGATTTTCCAGATTGGAAAGGCCATTGGGAGAAAGACCAAAAGAGAGAAGTGAAGTGTAAGCTT  
CCATATACACTTTGCTGCATTTTTTTCACAGTTTCTAGACCTTCAATGTTATGTCTTTTTTC

>TCONS\_00073836

GGAGGACCACCTTGTCTGTGCTTCTTGTCCCAAAGGTCCTTAATTCCATTCTGAATCACTATTCTCTGGATGCAA  
ATCATTATGAGCTCTCTCATTGTCTATTCTGGGTCTCTGGTATTTCCAAAAGAACTCCTAGAAGAACGTCTTG  
GATGTTGTATAACCGACGAATGCCGTTTCAGAGAAGACAAGACATCATCTGTAGTACTTTTAATTTCAACCCC  
AAAAACACAGGAATCCCATTTGCTTCAACCACATTAGTACCTGACGATTTGTTTGCTCATCACTGAGAA

>TCONS\_00073859

TTGGGAGGAATTGACTTGAATAATTCAGGGAGTGTTGTCGTTAGAGAAGATAAAAAGCTTTTGACCATGCTGT  
TTCCCGATGGACGTGATGGGCGAGCTTTTACTCTTAAGGTATTTCTCTTCTCTCTACTCTCATCTCTCTCTCTC  
TCTCTCTCTCTCTCTCTCTCTCTCTCTCTCTCTCTCTCTCTCTCTCTCTCTCTCTCTCTCTCTCTCTCTCT  
TCTTAATGCATGTTACAAGCAATTTACTTGGAGGAGTTGGGCAGCAAAATAAGTTGAATTTCTGGTTATTCTTT  
TCTAAACAGTTTGAACCTCCATGG

>TCONS\_00073884

TGCTCGATCTTGGGTCTGAGGTATGGGTCTGAATCATGATAAAGAAGGTTCCGGTGGTTGTATAATTCCCAAGCG  
GAAAGTCGTATACTTTAAAAGTAGATGGAGTGATCAAGCGGCCCTTCTTGCGCCAACATACATCCAATGGCA  
TAGAGTGATGCGTCAGTATGAACATGGAACCTCTTATTCGAATCCGGAAACCGAAGGATTGGGGCTGACAGC  
AAACACTCATCTGCATGCTTAAAGGCTTAATCCTGTTCCGGTTCCCAAGCGTTATACCTTTCTTCTGCAATGAT  
TCCATTCTGGGATTCCGCGCTTCGAAAAGTCTTTTTTGATGCGTCTGTAATAGCCTATGTGTCCCAAAAAAGAA  
CGTGCTACGCCCCGGCCCCCTTTTTCAGTAGATGAGATTAGGATGAAAGGGCTTCTTTTCATTAACATTCACTGA  
AGGTGCATAGCTTCTTTGAATGTCCCGCTGATTGACTACTACATCTAGGGACGGGACTGATCCCGAAAGAGA  
GGTCTTTCTTTATGGTTATGAAATCGCTTTGATTGAAAAGCAAGTCGATGATGCCATAAGTCAAACGGGCGGG  
TGAGGCGAGAGTCCTTCACTGCACTCACTGGAGAGAGGGTAACATATCCTATATAGTAGTAAGGTCTTATCCC  
ATTATTAGTAGCCGAAGTGTGGGCCGGCTAATTCAGGAAAAAACTTTCACATGTGCATAGGAAGACTAGAAC  
ATGTTTAATAAGCCTTAGTCGACCTCCGGAGGACAACAATTTTCTTTTCCAATCTGAGATTCTCTTTTTTCATTTT  
CTCCAGTAGAGGAAGGTTCTCTCTTTATTCTCTTGAGGGACAAGAAAACATCCAGGTACTTGATAGGAAAAC  
ACCATTTTTTTTTTGATTCTCTTCAATGATCTGGAATTTCTGCGAGGAGCTCTGTTGAGAGGAAGCACTGGC  
TCTTATCGAAATTGACCTTTTGGCCATTACAACATTACAATCAGCTTCTTACTTCTTTCCAGAAAGATTTTCTGC  
TTCTTAAGATTCCGTTTATGGCTATTATATAATATTAGAACATCGTTATCAAAGAGAAAGTAGGAGAGTGCTG  
GGCACGATCTCGAAGCATGGTAAGATGTTATCATTTTCAATGATACCAAGTCCCGGCTTAGCACTTCTTCAGC  
TAAAATCAACAGGCTAGGTTTGGAAACCCTTGTCTGCAGCCCTCGAGAAGCTGGAAAGTACCCATGTGGCACAC  
CATCCACAAGCACTCCAAAGTCTTACATACATAAACATCCATGTATCAAATTCGCCATTTATCACAAAAGCC  
CATTCGATCCAAAAAGATGCTTTTGCCATATCCTGACTTTCTTTTGACCCCCCTCCCTCCTATGTTGTCTTTAGG

TAAAAATCCCCTATCACTTAAAGCCACCTCGTGAGCCAAGGAGATCTTCTCTACAATAGTGAGTCCTTTAACA  
AAAGCGCCCCCTTTTCCTTAACTATTTTTATAGGGAGAATCAAACATAATTCTTCGAGCTAGAGAGAATTTTATA  
GAAAAAGTTACAAAGCTCTCCTTCAAATA

>TCONS\_00073885

TGCTCGATCTTGGGTCTGAGGTATGGGTCTGAATCATGATAAAGAAGGTTTCGGTGGTTGTATAATTCCCAAGCG  
GAAAGTCGTATACTTTAAAAGTAGATGGAGTGATCAAGCGGCCCTTCTTGCGCCAACATACATCCAATGGCA  
TAGAGTGATGCGTCAGTATGAACATGGAACCTCTTATTCCAATCCGGAAACCGAAGGATTGGGGCTGACAGC  
AAACACTCATCTGCATGCTTAAAGGCTTAATCCTGTTCCGGTTCCCAAGCGTTATACCTTTCTTCTGCAATGAT  
TCCATTCTGGGATTCCGCGCTTCGAAAAGTCTTTTTTGATGCGTCTGTAATAGCCTATGTGTCCCAAAAAAGAA  
CGTGCTACGCCCCGGCCCCCTTTTCAGTAGATGAGATTAGGATGAAAGGGCTTTCTTTTCATTAACATTCAGTGA  
AGGTGCATAGCTTCTTTGAATGTCCCGCTGATTGACTACTACATCTAGGGACGGGACTGATCCCGAAAGAGA  
GGTCTTTCTTTATGGTTATGAAATCGCTTTGATTGAAAAGCAAGTCGATGATGCCATAAGTCAAACGGGCGGG  
TGAGGCGAGAGTCCTTCACTGCACTCACTGGAGAGAGGGTAACATATCCTATATAGTAGTAAGGTCTTATCCC  
ATTATTAGTAGCCGAAGTGTTGGGCCGGCTAATTCAGGAAAAAACTTTACATGTGCATAGGAAGACTAGAAC  
ATGTTTAATAAGCCTTAGTCGACCTCCGGAGGACAACAATTTTCTTTTCCAATCTGAGATTCTCTTTTTTCATTTT  
CTCCAGTAGAGGAAGGTTCTCTCTTTATTCTCTTGAGGGACAAGAAAACATCCAGGTACTTGATAGGAAAAC  
ACCATTTTTTTTTTTGATTCTCTTCAATGATCTGGAATTTCTGCGAGGAGCTCTGTTTCGAGAGGAAGCACTGGC  
TCTTATCGAAATTGACCTTTTGGCCATTACAACATTACAATCAGCTTCTTACTTCTTTCCAGAAAGATTTTCTGC  
TTCTTAAGATTCCGTTTATGGCTATTATATAATATTAGAACATCGTTATCAAAGAGAAAGTAGGAGAGTGCTG  
GGCACGATCTCGAAGCATGGTAAGATGTTATCATTTTCAATGATACCAAGTCCCGGCTTAGCACTTCTTCAGC  
TAAAATCAACAGGCTAGGTTTGAACCCCTTGTCGCAGCCCTCGAGAAGCTGGAAAGTACCCATGTGGCACAC  
CATCCACAAGCACTCCAAAGTCTTCATTACATAAACATCCATGTATCAAATTCCGCCATTTATCACAAAAGCC  
CATTCGATCCAAAAAGATGCTTTTGGCCATATCCTGACTTTCTTTTGACCCCCCTCCCTCCTATGTTGTCTTTAGG  
TAAAAATCCCCTATCACTTAAAGCCACCTCGTGAGCCAAGGAGATCTTCTCTACAATAGTGAGTCCTTTAACA  
AAAGCGCCCCCTTTTCCTTAACTATTTTTATAGGGAGAATCAAACATAATTCTTCGAGCTAGAGAGAATTTTATA  
GAAAAAGTTACAAAGCTCTCCTTCAAATA

>TCONS\_00073886

TGCTCGATCTTGGGTCTGAGGTATGGGTCTGAATCATGATAAAGAAGGTTTCGGTGGTTGTATAATTCCCAAGCG  
GAAAGTCGTATACTTTAAAAGTAGATGGAGTGATCAAGCGGCCCTTCTTGCGCCAACATACATCCAATGGCA  
TAGAGTGATGCGTCAGTATGAACATGGAACCTCTTATTCCAATCCGGAAACCGAAGGATTGGGGCTGACAGC  
AAACACTCATCTGCATGCTTAAAGGCTTAATCCTGTTCCGGTTCCCAAGCGTTATACCTTTCTTCTGCAATGAT  
TCCATTCTGGGATTCCGCGCTTCGAAAAGTCTTTTTTGATGCGTCTGTAATAGCCTATGTGTCCCAAAAAAGAA  
CGTGCTACGCCCCGGCCCCCTTTTCAGTAGATGAGATTAGGATGAAAGGGCTTTCTTTTCATTAACATTCAGTGA  
AGGTGCATAGCTTCTTTGAATGTCCCGCTGATTGACTACTACATCTAGGGACGGGACTGATCCCGAAAGAGA  
GGTCTTTCTTTATGGTTATGAAATCGCTTTGATTGAAAAGCAAGTCGATGATGCCATAAGTCAAACGGGCGGG  
TGAGGCGAGAGTCCTTCACTGCACTCACTGGAGAGAGGGTAACATATCCTATATAGTAGTAAGGTCTTATCCC  
ATTATTAGTAGCCGAAGTGTTGGGCCGGCTAATTCAGGAAAAAACTTTACATGTGCATAGGAAGACTAGAAC  
ATGTTTAATAAGCCTTAGTCGACCTCCGGAGGACAACAATTTTCTTTTCCAATCTGAGATTCTCTTTTTTCATTTT  
CTCCAGTAGAGGAAGGTTCTCTCTTTATTCTCTTGAGGGACAAGAAAACATCCAGGTACTTGATAGGAAAAC  
ACCATTTTTTTTTTTGATTCTCTTCAATGATCTGGAATTTCTGCGAGGAGCTCTGTTTCGAGAGGAAGCACTGGC  
TCTTATCGAAATTGACCTTTTGGCCATTACAACATTACAATCAGCTTCTTACTTCTTTCCAGAAAGATTTTCTGC  
TTCTTAAGATTCCGTTTATGGCTATTATATAATATTAGAACATCGTTATCAAAGAGAAAGTAGGAGAGTGCTG

GGCACGATCTCGAAGCATGGTAAGATGTTATCATTTTTCAATGATACCAAGTCCCGGCTTAGCACTTCTTCAGC  
TAAAATCAACAGGCTAGGTTTGGAACCCCTTGTCGCAGCCCTCGAGAAGCTGGAAAGTACCCATGTGGCACAC  
CATCCACAAGCACTCCAAAGTCTTCATTACATAAACATCCATGTATCAAATTCGCCATTTATCACAAAAGCC  
CATTCGATCCAAAAAGATGCTTTTGCCATATCCTGACTTTCTTTTGACCCCCCTCCCTCCTATGTTGTCTTTAGG  
TTAAAATCCCCTATCACTTAAAGCCACCTCGTGAGCCAAGGAGATCTTCTCTACAATAGTGAGTCCTTTAACA  
AAAGCGCCCCCTTTTTCCTTAACTATTTTTATAGGGAGAATCAAATAATTCTTCGAGCTAGAGAGAATTTTATA  
GAAAAAGTTACAAAGCTCTCCTTCAAATA

>TCONS\_00073897

CCTCCCAAAAAAGCCCTTCAAAAGAAGAAAAAGCAAATAACAAACAACCTGCATCACTTGACTTCTCTGGTC  
ACTGCTTTACATTTCAACTGGTGAAAACATCAAAAATAATTCAAACCACATATCGATAAGTAATGTAACGG  
CCTGCAGTCTCACTTGGTCTGATAATCTTCACGACTTGGCCACGTTTTAGCCCATAATATCTCGCAATAGGATC  
AGTGATCTGAATTCGAGGAAGCTGTGTTTCTTCACTGTGTATCGTTCCAACAAGGTTTTCTTTCTTCAGGAGT  
AAGTGGCTGGTGCTCAGGAAGTGAACATGATTTTTTATGTTTACCAACAACCTCTGCTTCTGGAAAACCTCC  
AAGTGAAATTTTGTAGATATTTCACTTATGCAAGTACGAGCAAAAAAGAGTCAAATTTTGTGTACAACCAGG  
ATTGCTTGGAAGACATCTTCTTTTTTCATGCGTTCTGTATAAGTTTTTCATTGTCTTAACACCAACCTTTGCCTCCT  
CTGGAAAGAACACATATATCAGCTCAGAGCTGTTGTTGCGCTTGGCTTTCTGAATTACAAGGTCTTCTCTCTTC  
ATGTTGTCACCATACTTCTGAAGGAACTGATGTTTTGACATATTTATCTCAAACCTCTCCGACAAGGTAGCCCCCT  
ATCAGCTAACATTTCCATCAGTGTCTTACGAACCTCTGAAAAGTCTTGAGAGCTCCTCTTCTGATAGAGTCATCT  
TTTCCCTACTAAATTCAAAAATTAGAAAGAATGCATTTATAAGTAAAGAATAGGGTA

>TCONS\_00074025

GCGATTATGCAATTTAAATGTGTCAGCAAAGTAGCAAGAGGGGCGTAAAGGAAATGAAATCCTGTTTATACA  
TGTTGTTCTGCTGTACATATGACACTAATAATAGATACCTGTAGCAAGAGACAAAATGACCAAAATCTGGATT  
CCCCGGAGATGTTTCTTGGTCTAACTTGAGAGCTGCAGGACCCATCTGAGCTGATTGAGAAGCGCTTTGGCAC  
GAGCTGCATGTTACATGCTGATATGGCCCAGTAGGGTAAATAGTTGAACTACCACTGCTACCACTGTTACAAG  
TACAGCCCCGACTGGTTGCTGGCCAACTTGTGGTAGAAGGAGATGGGCTGAGGCCTGGACTAGAAAGGTTCA  
TCCTACTATCAACTGTGGCTAACCCCTGCTGCCACTGCTTAAAACAGAAGTTACATACTCTTATCCTGTCTCCA  
TCTTCCCCGCCAGCCTTGGGCTCCTCATTTGGGATAGGAACAGAGTTTGATGCACATTTGGCACAGAAAACCTC  
GGCCACAGAGACGACAATGATGCCTGCGGTTAAATACAGTAACTGAGAATCGCACTCGTAGCATACCCTAC  
AGCTCTGGTCGGGCATCCAGAAATCCCTGGACACACTCACCTGCTCTGTCTTCTCGGGATCCATGATTTTACT  
ATGTCAACTATCTCATTGAGCTTCTTATTTTCAGGTGTATCCATGAATGCAACTTCCAGGATATCATGCTCATC  
ATTATCTAATAATCATCTGCAACTGCTCGTGCTACTACCAATATGTATGTGTCTCCAATATATACAATTTCAGA  
TCCTCTATACACCGAACCAACCACCAGCCACCGCCT

>TCONS\_00074180

AAAGGAAGCGCCATCATGAGTTGGTATTGTATGTGGAAGCAGGGTGAAGAAGACACTAATGTGAGCTTGGAT  
CGGAGCTATAGAGTTTAAGGTGTTTCCTATTTAATTCTAAAACAGTTGCAGAGATCCTGTTGAGAGGTTGAGA  
ATGGGGAGAGAGGAGGAAAATGTGTAGGCTAGAACCTTATGCATTTTATGAATGATACATTGATATGGAGAG  
GTTCTCATGCATCTATCAAGCTGGTCTGGAAAGTGCATTTTTTGCTAGGCAGAAGCCAAGTCTTGAGTTCGAA  
GAAGCGACTAGATTAGGATTACCTGCGCCACAATACTGCTTAATGGAGGTTGGATCTGATGATTTTCAGCATCG  
CTTATGCAATATTCATGTGATTTTTTGCATGCACAGCCATGGAAACCTACAACGATATGCATTTGTTTTCAAGG  
GTTGTTTTCACTCTTTAAGAACTGGATAATGATGAGGAATTTGGTCAACACAATGGAATGTGCCAGGGCTGTA  
GCAAACTTCTGATGACATTTCCGAAGGCAAAATTGGTTATTGTGGTTGTAATGGAAATGACAAAATTCAT  
GTAGGATTTGCAACGAAGTGCTCTCAGTTAAGTCTTTGGTGGCTGTGATTTTCGCCGAAGTTGATATTGCTGGC

AATGAATTTAGTTTCTTTACTGAAAGGTGCTTGGATCCAAACATCTCGAGAATAGGCACTTAGGTTCTTGATCT  
CAAGGTTTTAGAAATCAAGGATCAATCACTTCAGGGTGCAGATGAAACCTGAAGCTATATTTCTTATAGAGG  
GATCGGCATGGGCTTCTATTAGAGTTGGACTTAAGATCCTTGGTGCAAGAACTGGAGATCAAGTTTGAATTAT  
AATAGTCACCAATTCTTTGTGTATTATTTTCAGCTGTTTTAGGCTCCTT

>TCONS\_00074284

ACTGGTGCTTGAACCTCCATTACAAAGCTCTCAATAGATGAAGCAGCAAATTCAGCTTGTTCTTGCTTAAAC  
ATCATGTCCTTGTAGCACTTTGAGCACATGTTTCATTGTTGTTGCAGTTCCAAAAAACCCACAATTGTTAACACA  
AAGGGTAGGAGCTTGAGGAGCTTGGCAACCTGTGTCATTTTGCTCCATCTTAAATTTTCTGTTTCGCAGAAGA  
CACAACAAAATCCTTTCTTTAGAGAAC

>TCONS\_00074305

CCACCATGACGGTCAGTTGCTTTCTTCACGTAATTGAACTGTACAATACCAACAGGCAGCTGGGAACTAATCA  
AGACACACAGCGATGGCATGATCTATTTTTTGCAACCAAATGCAAACAGTTGTCAACAACCTACAGGAAAAT  
ACTAATGTTTCATTTAGAAGAATGTCTCCCTATACCAGAGAAAACTGAAAAGTGAGCAGAGGCCACGCACCAC  
ACAGATCATCAAGACTGGAAGACAGTTACAGTCGCAATGTAACCATTCTTCATCACCTCAAAGGCAAGATTT  
TGGTAGCCATATACAAAGGTAGATCCAAACGGATTGCTTGTAGAGCCTTGCGTTTGGATAGCAGCTCGACCA  
CAATCCCCTAGTATCTCCTTAACCTGTTCCCACTTTGTGCTGGCTGTTATAGTGCCTTTAGAGGAGTTTACATCC  
TGATGATATGACCCAACAAAATCAGAACAAATGGATAACAAAATTGCACTTCATATATGAATTGAAATCAGCA  
TGCCCAGGATAGTTGGTGTGCAAGACAACTTCTTGATCTTATGTGTCTG

>TCONS\_00074343

TTACCAGAAATATCAAGCCTCCCATATTGTGTTTGTATAAACTTTGCCAAGGACTCAATGCTCTGAGCATCTTGA  
ACATCAAGTTGATGGAAAACAATATTTGAAAAACCTTGTTTATTAAGCAAAGATGTTGCTTCCATTCCCCTCTT  
CTCGTTTCTGGCTGTTAAGATAACCGTCACACCTGAATTAGCAAGCTGCTTGACAGTCTCAAAGCCAATTCCC  
TTGTTTGCTCCTGTAACCACC

>TCONS\_00074349

GATTGTAAATGTCTCCTCCCTTAGAAGTGAACATAAAGCGAGTTCCAAACGAGGAGAGGAGGAAGGAACCTTGG  
AGATATTGAAAACCTTGACAGAAGATAAAATTGAAAAGATTCTGCAGAAATTTTGCATGATCTGAAACAAGA  
TGCTCTAGAAGTGAACGGGTTGGCAGATAATGCTACCGGCATATAGCATATCGAAAGTGTCTCTTAATGCTTA  
CACCAGAATTCTTGCAAGAAGGTGCCCCGAAAATGTGTATCAATTGTGTCCACCCTGGATATGTCAACACCGA  
TATAAACTGGCATAACAGGAACAATGCCTGTGCAAGAAGGAGCCGAAGGCCCTGTTATGCTAGCTCTTTTGCC  
AGATGGAGGACCTACTGGTTGCTACTTTGATCGTACTGTAGTAGCCGAGTATTAGATCCTGTTATGAAACAAG  
GCTTAGTGAAAGACGTGTTTCTTGTATTTGGTTGGATCTCTGAGCTGGGATGATGTCTGGTGGTTGCATTAGTA  
GTTGAAAAAATGAGGGAAGCAAAGAATAAAATTGGTCCTTTTATGTGTCCATATCACGAGAGTTGTTTTTGAA  
TGAAACATCATTAACATTTTTCCTTGATTAAATCATCCAGTCCGATAAATCAGTTTCATGAATCACAATTACTA  
TTTGGTTCTCCAGGACAAAATGAAGATGCCCTAAGGACCTTGAACATAGATCCTGTAGACTTGGTAAAGAGAA  
TTTGCTCAAAGATTATTATGGATTTACATG

>TCONS\_00074375

CGAGTCCAACGAATATTACAACACTTTGCACATGGGCATTGAATTTCTTCGCCTTGAGGATCTCCATAAGAGT  
AAGCAAAATCTAAGAAAGATTGAACACCCTCGATATACTCTTTGCTATACCTTGGTAAATCCATCCATTCTT  
GGATGGAACATTTGAATTCCTAGCCATGACACTTAAGCTAAGCCAAATACAACTTTAAGTCCACCGCAAAT

>TCONS\_00074387

CCGAGGGTCTGACCAAGGCATTGACTTCCTGAAACTACTTGTGCCAAAATAGGGAGCACACGAGCCGAGG  
GTCTCGTTGCTGAGAATTTACTTAGCCATGCTAAGGTATGATACATGAGCGCTGAGAACCATGAAGCGAGTG



GCACCTCGTGGATTGGGCCTATTCGATCAGGTTGGGATCGAACTCGTGCCGATCACACGGTGACTGAGACAG  
AATTAAGTCAGGATAGTTGGAAGTCCCAAAGTATAAAG

>TCONS\_00074392

CTTTATACTTTGGGAGTTCCAACATCCTGACTTAATTCTGTCTCAGTCACCGTGTGATCGGCACGAGTTCGAT  
CCCAACCTGATCGAATAGGCCCAATCCACGAGGTGCCACTCGCTTCATGGTTCTCAGCGCTCATGTATCATAC  
CTTAGCATGGCTAAGTAAATTCTCAGCAACGAGACCCTCGGCTCGTGTGCTCCCTATTTTGGCACAAGTAGTT  
TCAGGAAGTCA

>TCONS\_00074484

CTTTGGTGCAAGGAAGAATAAAATGCATTCCCAGTTACACCATTAGATTGTTAAAAATATTACCAGGAAACA  
CATGTTTTAAAGTTACAGGCGCTATGCACATTATATGATTTAACAATCTTCATTACTGTTTTATATCCAGTGGT  
CCAAGCAAACCACAGTTGGTGTCTAGTATGTCAATGTCATACTAAATTTCTAGGAGTACATGCTCTTACATCT  
CAGCAGCAAATGATTTACCACAACCACAGGTTTGGCTAGCATTTGGATTTTTGAAAGAGAAGCCCCCACCTA  
TCAATGCATCGCTATAGTCCAGTTGCATTCCAAAGAGGAAGAGAAGACTTTTTGGATCACAACAATATTAA  
ATCCATTGTATTCAATGATCGAATCATCTGGTCTAGCATTTTCTCGTTTTTCAAACCTCCATTGTATATGACATGC  
CTGAGCATCCACCTTGTTTAAACACCAATTCTAAGACACAGGTCCTCATTCCGCTCATTCTCATCTTATTCAAG  
TGCTTTAATGCATTGTCGGTTAAGGAAATAGCAGGTGCTACTCCTCCAGATGCGGGTGCATCCATCCAAGTCT  
TCAATACAATGTAAT

>TCONS\_00074652

GCCACCCACTGCCACTAAATCACCACCCTCCAAGTTAACTGGTACTTGCTGTTGCGCCAGGAGCCGTTGCAC  
CAGGTGCTAAAGCATGGGTGTTTTGTATCCATTGAGCAAAAACAGGTTGTAATTGTATAGCGGTATCTGAAAA  
CATATCTTGAGGACGCCCTAAAGCGCTCATGGTATCATTATGAATATACAAACCAAACTGTGAAAGCCTAG  
AAATATACATGCCCAGTTGAGATGGGATATGATTGCATCACGATGTCTAAGGACACGATCTAATAGATCGTT  
GTACCGAGTAGTTGGATCATAATCTCTTACCATAAAAATGGCTGCATGCGCGGCAGCACCAACTATGAGAAA  
TCCACCAATCCACATGTGATGTGTGAACAATGACAGTTGTGTACCATAGTCAGTAGCTAGATACGGATAAGG  
GGGCATGGAATACATATGGTGAGCTACAACAATGGTTAAAGAGCCTAACATAGCTAAGTTAAGAGATAATTG  
AGCATGCCATGACGTTGTTAGGATCTCATATAGGCCTTTATGGCCCTGACCTGTAAATGGACCTTTATGAGCTT  
CTAAAATATCTTTTAGTCCATGACCAATACCCAGTTGGTCCTATACATGTGACCTGCTATCAGGAAAAGAAT  
TGCAATAGCTAAATGGTGATGGGCAATATCAGTCAGCCACAGACCCCCAGTTACTGGATCTAATCCTCCACG  
AAAAGTAAGAAAGTCCGCATATTTTGACCAATTCAAGGTGAAAAATGGGGTTGCTCCCTCGGCAAACTGGG  
ATAAAGTTGAGCCAAAAGATCTCGATTCAAGATAAATTCATGAGGAAGTGGTATCTCTTTAGGATCTACTCCA  
GCGTTTAGAAATTGGTTAATCGGTAAAGATACATGTACTTGATGCCCCGCCCAAGAGAGAGACCCAAGTCCT  
AGTAGCCCTGCCAAATGGTGATTCAGCATAGATTCTACATCTTGAAACCAAGCCAATTTTGGCGCCGCTTTAT  
GATAATGAAACCAACCAGCAAAAAGCATTAAACGCTGCAAAGACCAATGCCCCAATTGCTGTACAATAGAGT  
TGTAATTCAGTAGTTATTCCAGATGCTCGCCAAATCTGAAAAAAACCAGAGGTTATTTGTATTCTCGGAAAC  
CCCCGCTACGTCACCATTTAATATTTT

>TCONS\_00074653

CCCAGAAGGTAATGGGTACTCCTACAGCACGTCCTTGATAATGCTCAAGGCTCTCGGCTGAGTAGCAGGA  
GCAACTTTTAATTTATTATGAGCCCAAACGATGGATTCAATAAGTTCTTGCCAATAACCACGTCCACTGAATA  
GAAACATTAACTAAAAGCCCAGACAAAATGAGCACCTAGGAAAAAAAGGCCATATGCAGATAATGAAGA  
ACCATAAGACTGAATTACCTGGGATGCCTGTGCCATAAGAAATCGCGGAGCCACCCATTAATAGTAATAGA  
ACTTTGCGCAAAGTTTCTCCCGTGATATGAGTTACTACCCCTTGATCACTTACACTGCCCCAAACATCTGACT  
GCATTTTCCAACGTGAAATGGAATATTACTACCGAAATTGCATTGTACATCCAGAATAGTCCTAAGAAGACAT

GATCCCAGGCCGATACTTGACATGTACCCCCTCTTCCAGGTCCATCACAAGGAAAACGAAAACCAAGATTTG  
CTTTATCCGGTATCAAACGGGAACTGCGAGCAAATAGAACACCTTTCAAGAGTATCAATACCGTCACATGAA  
TCGTAAATGCATGAATGTGATGTACCAAGAAATCCGCGGTTCTAATGGAATAGGCAACAAAGCCACCTTGC  
CACCCACTGCCACTAAATCACCACCCCCCAAGTTAACTGGTACTTGCTGTTGCGCCAGGAGCCGTTGCACC  
AGGTGCTAAAGCAT

>TCONS\_00074654

CCCAGAAGGTAATGGGTACTCCTACAGCACGTCCTTGTATAATGCTCAAGGCTCTCGGCTGAGTAGCAGGA  
GCAACTTTTAATTTATTATGAGCCCAAACGATGGATTCAATAAGTTCTTGCCAATAACCACGTCCACTGAATA  
GAAACATTAACTAAAAGCCCAGACAAAATGAGCACCTAGGAAAAAAGGCCATATGCAGATAATGAAGA  
ACCATAAGACTGAATTACCTGGGATGCCTGTGCCATAAGAAATCGCGGAGCCACCCATTAATAGTAATAGA  
ACTTTGCGCAAAGTTTCCTCCCGTGATATGAGTTACTACCCCTTGATCACTTACACTGCCCCAAACATCTGACT  
GCATTTTCCAAGTAAATGGAATATTACTACCGAAATTGCATTGTACATCCAGAATAGTCCTAAGAAGACAT  
GATCCCAGGCCGATACTTGACATGTACCCCCTCTTCCAGGTCCATCACAAGGAAAACGAAAACCAAGATTTG  
CTTTATCCGGTATCAAACGGGAACTGCGAGCAAATAGAACACCTTTCAAGAGTATCAATACCGTCACATGAA  
TCGTAAATGCATGAATGTGATGTACCAAGAAATCCGCGGTTCTAATGGAATAGGCAACAAAGCCACCTTGC  
CACCCACTGCCACTAAATCACCACCCCCCAAGTTAACTGGTACTTGCTGTTGCGCCAGGAGCCGTTGCACC  
AGGTGCTAAAGCATGGGTGTTTTGTATCCATTGAGCAAAAACAGGTTGTAATTGTATAGCGGTATCTG

>TCONS\_00074655

CAGAAGGTAATGGGTACTCCTACAGCACGTCCTTGTATAATGCTCAAGGCTCTCGGCTGAGTAGCAGGAGC  
AACTTTTAATTTATTATGAGCCCAAACGATGGATTCAATAAGTTCTTGCCAATAACCACGTCCACTGAATAGA  
AACATTAACTAAAAGCCCAGACAAAATGAGCACCTAGGAAAAAAGGCCATATGCAGATAATGAAGAAC  
CATAAGACTGAATTACCTGGGATGCCTGTGCCATAAGAAATCGCGGAGCCACCCATTAATAGTAATAGAAC  
TTTGCGCAAAGTTTCCTCCCGTGATATGAGTTACTACCCCTTGATCACTTACACTGCCCCAAACATCTGACTGC  
ATTTTCCAAGTAAATGGAATATTACTACCGAAATTGCATTGTACATCCAGAATAGTCCTAAGAAGACATGAT  
CCCAGGCCGATACTTGACATGTACCCCCTCTTCCAGGTCCATCACAAGGAAAACGAAAACCAAGATTTGCTT  
TATCCGGTATCAAACGGGAACTGCGAGCAAATAGAACACCTTTCAAGAGTATCAATACCGTCACATGAATCG  
TAAATGCATGAATGTGATGTACCAAGAAATCCGCGGTTCTAATGGAATAGGCAACAAAGCCACCTTGCCAC  
CCACTGCCACTAAATCACCACCCCCCAAGTTAACTGGTACTTGCTGTTGCGCCAGGAGCCGTTGCACCAG  
GTGCTAAAGCATGGGTGTTTTGTATCCATTGAGCAAAAACAGGTTGTAATTGTATAGCGGTATCTGAAAACAT  
ATCTTGAGGACGCCCTAAAGCGCTCATGGTATCATTATGAATATACAAACCAAACTGTGAAAGCCTAGAAA  
TATACATGCCCAGTTGAGATGGGATATGATTGCATCACGATGTCTAAGGACACGATCTAATAGATCGTTGTAC  
CGAGTAGTTGGATCATAATCTCTTACCATAAAAATGGCTGCATGCGCGGCAGCACCAACTATGAGAAATCCA  
CCAATCCACATGTGATGTGTGAACAATGAGGAAGTGGTATCTCTTTAGGATCTACTCCAGCGTTTAGAAATTG  
GTTAATCGGTAAAGATACATGTACTTGATGCCCCGCCAAGAGAGAGACCCAAGTCCTAGTAGCCCTGCCAA  
ATGGTGATTACGCATAGATTCTACATCTTGAAACCAAGCCAATTTTGGCGCCGCTTTATGATAATGAAACCA  
CCAGCAAAAAGCATTAAACGCTGCAAAGACCAATGCCCAATTGCTGTACAATAGAGTTGTAATTCAGTAGTT  
ATTCCAGATGCTCGCCAAATCTGAAAAAACCAGAGGTTATTTGTATTCTCGGAAACCCCCGCTACGTCAC  
CATTTAATATTTTC

>TCONS\_00074673

CTTGTATACTGTTGAGGCTACTGTTAGTGAGGAAATATTTATACCATTGGGCCGACAGTTTTGGACTTCGATCC  
AACGTGAGAGGATGGACATGATAAAGCCCAAATTTAATGGTGTAACCAAATCTCCATTCGAAATTATCCATC

AAGCTCCATATGAAATAAACCACGCACATCCGCACCATTCTGATTGAACGAGCCAAAGATGCTAGGTATGCT  
TTGTGATATTTAATTCGCTTCATGTCTTGATCCAAGTCATATCCTCCTCCTTGATT

>TCONS\_00074683

GGAGGGGCTCCCAAAGCCCAAGCGCTAAGCACAGACAACTCACGTGCTACCATATCAATACCTGGATCCGC  
ACGGTCAACTCACGTTCTACGCGGACAACTCACGCGCTATGGTATCAATACCTGAACCCGCACGGTCAACTC  
ACGTGCTACGCGGACAACTCACGCGCTATGGTATTAATATTACACAACCAGGCCCTCGGCCTTACTCAATC

>TCONS\_00074684

GGAGGGGCTCCCAAAGCCCAAGCGCTAAGCACAGACAACTCACGTGCTACCATATCAATACCTGGATCCGC  
ACGGTAAACTCACGTGCTACGCGGACAACTCACGCGCTATGGTATCAATACCTGAACCCGCACGGTCAACTC  
ACGTGCTACGCGGACAACTCACGCGCTATGGTATTAATATTACACAACCAGGCCCTCGGCCTTACTCAATC

>TCONS\_00074685

TCTGCGCTCACTGGGGGTGTGTACAGACTCCGGAGGGGCTCCCAAAGCCCAAGCGCTAAGCACGGACAACTC  
ACGTGCTACCATATCAATACCTGGATCCGCACGGTAAACTCACGTGCTACGCGGACAACTCACGCGCTATGG  
TATCAATACCTGAACCCGCACGGTCAACTCACGTGCTACGCGGACAACTCACGCGCTATGGTATTAATATTCA  
CACAACCAGGCCCTCGGCCTTACTCAATC

>TCONS\_00074686

CTGGGGGTGTGTACAGACTCCGGAGGGGCTCCCAAAGCCCAAGCGCTAAGCACGGACAACTCACGTGCTAC  
CATATCAATACCTGGATCCGCACGGTAAACTCACGTGCTACGCGGACAACTCACGCGCTATGGTATCAATAC  
CTGAACCCGCACGGTCAACTCACGTGCTACGCGGACAACTCACGCGCTATGGTATTAATATTACACAACCA  
GGCCCTCGGCCTTACTCAATC

>TCONS\_00074687

GGTACATGATTGAGTAAGGCCGAGGGCCTGGTTGTGTGAATATTAATACCATAGCGCGTGAGTTGTCCGCGTA  
GCACGTGAGTTGACCGTGCGGGTTCAGGTATTGATACCATAGCGCGTGAGTTGTCCGCGTAGAACGTGAGTTG  
ACCGTGCGGATCCAGGTATTGATATGGTAGCACGTGAGTTGTCTGTGCTTAGCGCTTGGGCTTTGGGAGCCCC  
TCCGAAGTCTGTACACACCC

>TCONS\_00074688

GGTACATGATTGAGTAAGGCCGAGGGCCTGGTTGTGTGAATATTAATACCATAGCGCGTGAGTTGTCCGCGTA  
GCACGTGAGTTGACCGTGCGGGTTCAGGTATTGATACCATAGCGCGTGAGTTGTCCGCGTAGCACGTGAGTG  
GACCGTGCGGATCCAGGTATTGATATGGTAGCACGTGAGTTGTCTGTGCTTAGCGCTTGGGCTTTGGGAGCCC  
CTCCGAAGTCTGTACACACCC

>TCONS\_00074689

GGTACATGATTGAGTAAGGCCGAGGGCCTGGTTGTGTGAATATTAATACCATAGCGCGTGAGTTGTCCGCGTA  
GCACGTGAGTTGACCGTGCGGGTTCAGGTATTGATACCATAGCGCGTGAGTTGTCCGCGTAGCACGTGAGTTT  
ACCGTGCGGATCCAGGTATTGATATGGTAGCACGTGAGTTGTCTGTGCTTAGCGCTTGGGCTTTGGGAGCCCC  
TCCGAAGTCTGTACACACCC

>TCONS\_00074690

GGTACATGATTGAGTAAGGCCGAGGGCCTGGTTGTGTGAATATTAATACCATAGCGCGTGAGTTGTCCGCGTA  
GCACGTGAGTTGACCGTGCGGGTTCAGGTATTGATACCATAGCGCGTGAGTTGTCCGCGTAGCACGTGAGTTT  
ACCGTGCGGATCCAGGTATTGATATGGTAGCACGTGAGTTGTCCGTGCTTAGCGCTTGGGCTTTGGGAGCCCC  
TCCGGAGTCTGTACACACCCCCAGTGAGCGCAGAGTGTTGAGTGTATTG

>TCONS\_00074691

GGTACATGATTGAGTAAGGCCGAGGGCCTGGTTGTGTGAATATTAATACCATAGCGCGTGAGTTGTCCGCGTA  
GCACGTGAGTTGACCGTGCGGGTTCAGGTATTGATACCATAGCGCGTGAGTTGTCCGCGTAGCACGTGAGTTT  
ACCGTGCGGATCCAGGTATTGATATGGTAGCACGTGAGTTGTCCGTGCTTAGCGCTTGGGCTTTGGGAGCCCC  
TCCGGAGTCTGTACACACCCCCAG

>TCONS\_00074692

GGTACATGATTGAGTAAGGCCGAGGGCCTGGTTGTGTGAATATTAATACCATAGCGCGTGAGTTGTCCGCGTA  
GCACGTGAGTTGACCGTGCGGGTTCAGGTATTGATACCATAGCGCGTGAGTTGTCCGCGTAGCACGTGAGTG  
GACCGTGCGGATCCAGGTATTGATATGGTAGCACGTGAGTTGTCCGTGCTTAGCGCTTGGGCTTTGGGAGCCC  
CTCCGGAGTCTGTACACACCCCCAG

>TCONS\_00074721

TACTTTCGAGGATTATGTTCTGATATCAACTCCTGGATAGGTCCATATAACCTTTCTGTTGGAAGAAAACCTTGT  
CGTGCAAAAGCATGCCATTGATATCCTTGGACCAACCTTATTTGCCAGTACTATATGTTCAACACTTTTGAAC  
TGTCATTTGATATAAGCTGAAAAAGATCTCCAATATTGACCACGAGAGCTCCGGGAGTAGGGGGAACATCTA  
CCCAATGGTTTTGATGTAGAACTTGGAGACCGCCAATATTGTCTTGGAGAAGCACGGTGAGGAAGTTACTGTC  
A

>TCONS\_00074844

AGCGACAACAGTTCCACCTCCGCCGAAGCGCACTCATTGTGTGGGATGATATCGAAGATTTTGCTCATAAAA  
GTTTATCAACATAAGTGGATTATTCATCTTCAGAACTTGTTATCCACCATAACTTCCTTTCCATCAGACCTCTT  
AGCTAAAAAGGTCACGGACACATCCTGAAAATCACTCGATACAGATGCCGAATAGCTCATAGGCTTTATAAT  
TTCTGCTATGGCACAGGCATCTTTGGAATCATCCCACTTATTTTTGCAACCCAAAGCATTGCCACAAATCCAT  
GATCGTGAATTCCTTCCTGCGTGAATGCAACAAAAGGACCACTAGTAGCATTGGTACAGCATCTTGGGAATC  
ATTCATTACACCTGAGGCAGTTTCCGGTTTAAACCTCCGAACAGAAGCAGGCTTCCTCCTTTTAGCTCTGGTAC  
AACGACCAGATTGAAGTGATTCTGTTCCATTGGCTGCTGAAAATCCACTTGTAAGGCCATCACCAGATCTATC  
CACAGATGTCTCTTTTGTGCTATCCCTCCGTTTAATTCATAAGCTTTAAATCCAATTCATTTTTCTCATTAATT  
TCTTTTATAGAGGAATCCAAATTCAAATCATTGTCGTTCCGCACTCCGTCCACTTGGATATCATTCAAACCACT  
ACCACTACTATCCACATGATTAATAGCATCCGAGCTAGCCAGAGGAGATGAAAGCATAGGTTCCCTCCATTAT  
GCTAACCTTCACTGCAGGCACATCATTGTAGC

>TCONS\_00074996

AATAAATCTAAGTGTAGTGCTTGGTGTATTGATTTTTTTTTTGGAAAGGGAGTGTGTGCGAGTTGTTTATTTCAA  
GAATAGGCTGGACCACCCAGCTGTACCATTTTTTCGTTATAACTAGGAAAGAGAGGTGCATGATCTCGCGAAT  
TACTTCTGAATAAATTCAGAAATTATATGTAAGAACCATAGCATTTCGCGATTCAATTGGTAAATCGATTTTGAT  
TCTCTATTAACCAATAATGTGGAACATTAACATGGTTAAAACAACTGTTTGAAGTCTAGACGCAGCATGGT  
ACTCTTTCTACCACTATGTTAATATAGAGGTGGTTTCAAATAAATATTTTATCGATATAGGATACTCATATTG  
ATAAAATGATTTGAACC

>TCONS\_00074997

AATAAATCTAAGTGTAGTGCTTGGTGTATTGATTTTTTTTTTGGAAAGGGAGTGTGTGCGAGTTGTTTATTTCAA  
GAATAGGCTGGACCACCCAGCTGTACCATTTTTTCGTTATAACTAGGAAAGAGAGGTGCATGATCTCGCGAAT  
TACTTCTGAATAGATTTCAGAAATTATATGTAAGAACCATAGCATTTCGCGATTCAATTGGTAAATCGATTTTGAT  
TCTCTATTAACCAATAATGTGGAACATTAACATGGTTAAAACAACTGTTTGAAGTCTAGACGCAGCATGGT  
ACTCTTTCTACCACTATGTTAATATAGAGGTGGTTTCAAATAAATATTTTATCGATATAGGATACTCATATTG  
ATAAAATGATTTGAACC

>TCONS\_00075078

CTCCAATATCGACCTCTTCAACGGTTGGCCTTGGCAACCCTCTCAATCTCATCCTTCTTTTTAATGGCATAGCT  
GTTCTGAAGAACCCTTGGCAGCATTGACCGGTTTCATCTGCAAGGCACTCAGCTATGGTCTTGATGTTCTGAAA  
GCACTCTCACGTGCACCAGTTGTCAGCAAATAAATTGCCTGGTTAACACGGCGAAGTGGAGAAATATCAACA  
GCCTGACGCCTCACAAACACCAGCCGAACCAATACGGGTTGCA

>TCONS\_00075090

ATGAACTAACATAGTCTTCTCAGATGAACAAGGGGAATAACCCCGACGTGTCTAGGATATCTATTCCCCAGG  
TGCCGAAACGCCTTGCTTCAGTCTTTCCTCTTCATCTTCTTCTTGAGACTGGCTTCTTTTTCTTTGGAGGAAG  
GGTTTTCTGTGCATACATGTAAAGCACATAGTTCCCAATAAGGAATGCCAACACGAGTCCGCCAACAAACAGT  
TAAGACAATTAATCCTGGGTTGAGTCTTTCACCTCAACATCCTTGGCCATATTCTTCACGTTATCAAAAGACG  
GAGGAGGATCAAAATCAGCTTCGGAATCCATGCCTTGAAACGCCGATCGTC

>TCONS\_00075209

CTCGGTGCAACTGTAGACCTGAGGCCTGAGGGTCTTTAGAGGAGCATCTTTATCAATGGAATATCTCCAGTGC  
AGCTGGACTAATGGGGATCAGACCAGAAGGTGATACAAGTGCATCAACAAGAACATCATTTGGAGTTAGTG  
GTATAGTGCCCTCATCCAATATCTGCACTGAGTAAGAAAGCGCAATCTTGAGAGGTTGCTTCCAATTTGCTC  
CTTTGCACGTTCTGATATCTTGTCAAGAAGGTATCGTAATAACTG

>TCONS\_00075246

CTATGCTCCAGTCATAGCAGAGCAGCACTATGTTTGTTAATCCTCCTTGTTACGAGCTAGTCTGGCCCCGGTGTC  
TAAGCTCGGCTTTTTTCCACCTCACAATCAGGTAACATAGTGAAAAGAGGGTATTAACCAAGATTATTATCGC  
AATAACCAACAGAGGGCCAGACCAGAGTGTGGAAAGAAAAATGCCGTGTGAATCGAAGTAATTCTGGCATG  
CAAAGCTTTTCCAGTTTGCAGCTAATAA

>TCONS\_00075427

CCAGGCCGCATTCTCCACTGATTCAGCTGAAGCCGGTGTTAGTTCCCCAATAACTACTACTACTACTACTAAC  
ATCTCTATGCTTCCCACAACCTTCTACCTCAACATGGCTTCTCTTAAATCTTGTTACTTCCACATGCCAAGGTTT  
ACTTCTGGGCAAGAAGCCATTGAAATGTAGGTGTTAAGAGTTTGTGCAAGGCTAGCTAGGAGGGATTAACTT  
AGCTTGAAAAGTTTGAGTAGTACCATATACAAGAAGTAAAAGTCCTCTAGCTGTATAGCCAAAGTATACCAA  
CAACAGAAGTAAAGATTGGTAAGGAAGATCTCCTCAAGATTGTTGTCATCATCAATACCATACTACTTACAA  
CAAATACATAATGTATACGTAAAGGACAGATGAACTGATTAATGAGAGTGGGGTCTCTCTCTGTGTTTATTTT  
GTACCCTCTTTTGTAGTTGTGTGCTGGACCACACTTTGAACAATAGCAAAAAATCAAAGGCAGGCTAGTAGTA  
ACCCTTAGTTATGATAGTAGTTTCCTCTCTTTCCTCTGTTTTTTTACTGTTGTTAACTTGCTATCATGTAAAAATT  
AAAGTTGAAATATGAAAAATGCCTTCTAGATCATCACTTTCTGCTAAATGGGGTTCTAGATTTAGCTTCCAAT  
ATTTTCAAGAATGAG

>TCONS\_00075428

CCAGGCCGCATTCTCCACTGATTCAGCTGAAGCCGGTGTTAGTTCCCCAATAACTACTACTACTACTACTAAC  
ATCTCTATGCTTCCCACAACCTTCTACCTCAACATGGCTTCTCTTAAATCTTGTTACTTCCACATGCCAAGCCA  
TTGAAATGTAGGTGTTAAGAGTTTGTGCAAGGCTAGCTAGGAGGGATTAACTTAGCTTGAAAAGTTTGAGTAG  
TACCATATACAAGAAGTAAAAGTCCTCTAGCTGTATAGCCAAAGTATACCAACAACAGAAGTAAAGATTGGT  
AAGGAAGATCTCCTCAAGATTGTTGTCATCATCAATACCATACTACTTACAACAATAACATAATGTATACGTAA  
AAGGACAGATGAACTGATTAATGAGAGTGGGGTCTCTCTCTGTGTTTATTTTGTACCCTCTTTTGTAGTTGTGT  
GCTGGACCACACTTTGAACAATAGCAAAAAATCAAAGGCAGGCTAGTAGTAACCCTTAGTTATGATAGTAGT  
TTCTCTCTTTCTCTGTTTTTTTACTGTTGTTAACTTGCTATCATGTAAAAATTAAAGTTGAAATATGAAAAAT  
GCCTTCTAGATCATCACTTTCTGCTAAATGGGGTTCTAGATTTAGCTTCCAATATTTTCAAGAATGAG

>TCONS\_00075429

CCAGGCCGCATTCTCCACTGATTGAGCTGAAGCCGGTGTTAGTTCCTCAATAACTACTACTACTACTACTAAC  
 ATCTCTATGCTTCCCACAACCTTCTACCTCAACATGGCTTCTCTTAAATCTTGTTACTTCCACATGCCAAGAAA  
 AGTTTGAGTAGTACCATATACAAGAAGTAAAAGTCCTCTAGCTGTATAGCCAAAGTATACCAACAACAGAAG  
 TAAAGATTGGTAAGGAAGATCTCCTCAAGATTGTTGTCATCATCAATACCATACTACTTACAACAAATACATA  
 ATGTATACGTAAAGGACAGATGAACTGATTAATGAGAGTGGGGTCTCTCTCTGTGTTTATTTTGTACCCTCTTT  
 TGTAGTTGTGTGCTGGACCACACTTTGAACAATAGCAAAAAATCAAAGGCAGGCTAGTAGTAACCTTAGTT  
 ATGATAGTAGTTTCCTCTCTTTCTCTGTTTTTTTACTGTTGTTAACTTGCTATCATGTAAAAATTAAAGTTGAA  
 ATATGAAAAATGCCTTCTAGATCATCACTTTCTGCTAAATGGGGTCTAGATTTAGCTTCCAATATTTTCAAGA  
 ATGAG

>TCONS\_00075434

CCCCACCAAGAAAAACATCATTCACTGAACAACCTCCTCCTATGAAGATGAGCATGAGGGGATTCTCACAAT  
 TCCCATAAGGGAAAAACAAGTGAATCACTTCTACCACTAGGACTCATAATTGGATCCAATGATGACTCGTCAA  
 GAAATGACAAGACTTGATGATCTTGAACCTTGAACACTAGTATTACTACCAAACTCATCATTAAGCTCATTGTT  
 ATTATTGTAAAAAGGTAGTGATAGTGAAGTAGTTGAAGACCCAGAAACAGAATTAGTTGAACCATTGACAAC  
 AGCAGCATAAGATAGTGAACCTAGAGCTAGCCATTATTGGTCTAGGGCTTCTTGAACACACAGGTGACCCACT  
 AGACCAAGGTGAATTAGGTGAAGAATGAACAAACCCATTATTAGGAATCATGATTCTTGGTGAAGATTGAGG  
 AAAAGGGTTCAACTTTGTAGCATTGACATGGGGTTAAAAGGTGAAGGAGAGTTAGGAGTTGAAGTTGCAGA  
 TGAAGTGTTTGATGAAAGTCCTAAACAAGCTTTAGCTTGGTTAATTAGTGAACCAAATGGGTTTCTGGACCA  
 AAAGCTAATCTTATCATCTCCTTTTCTCCTTGGTCTTGTATCAAAATATAACCCATGATTTTTGAAGCATTTTCT  
 GGATCCAAACTTTGAATCCTTGATAAACTATCTTTGTTGCTTCATATGCATCCATGGCAAAAACATTCACTAC  
 TACTAACTACTTCATACTACTACAAACCCCTTTGGTTTTTC

>TCONS\_00075435

CTTAAACATGTTGACAGCTCTCCTCTATCCATCGAATGCTGTTGTTGCAGTTGCTTCTTGTCTGCAACTTTTCCC  
 TTTTCTTGTAAGGCTTGACAAGTACACGAGAATCACACACAAAATGAGGGTTCCCTTTAGCCAAGATGAGCT  
 TCACGGTTTCTGGGTAGACAAATGTAAACGAATCCAAACATACGCTTCTGCTGATACGGAATTCTAACATCTTG  
 GACTGGCCCATACATGCTAAAGTAATTAGACACATCCTCCTCCTTAAATGTGCTATCAGCAGGAAATGTTAGG  
 TAAATCTGTCGCGAACTTGAATTTGAGATACCGCCCATCGCCATTGCTGAAAAATCACTTCTATCAGGCCGGC  
 ATCGACCAAATTTGTGGAATTCTTCTCCCATCATAAACGCTGCCGCAGCCGATCTTTGGTTATCACTCAAGAT  
 GTTCATACACTTGTTGTAAGCAAGTGGATGATGATGAGCACCAGAAGCCATAAGGGAGGCAGCAGCAAACC  
 TCTGTTGTTGCTGCTGTTGTAAGGCTTTATCCTCAGAAAATCATCAAAAGAGTCAACTTTATTATTACTAGGA  
 GAACCAACAATAGCACTAGACCCATCAGAATCTTGAAATCCACCAACACTATGCAAAAACCTTACAACCTATTC  
 CCATTCTTGCAAAACCTCTTGCAATAATACATGCAAGGCCTCCAACC

>TCONS\_00075436

TAGCAAGTTAACAACAGTAAAAAACAGAGGAAAGAGAGGAACTACTATCATAACTAAGGGTTACTACTA  
 GCCTGCCTTTGATTTTTTGCTATTGTTCAAAGTGTGGTCCAGCACACAACTACAAAAGAGGGTACAAAATAAA  
 CACAGAGAGAGACCCCACTCTCATTAAATCAGTTCATCTGTCTTTACGTATACATTATGTATTTGTTGTAAGTA  
 GTATGGTATTGATGATGACAACAATCTTGAGGAGATCTTCCTTACCAATCTTTACTTCTGTTGTTGGTATACTTT  
 GGCTATACAGCTAGAGGACTTTTACTTCTTGTATATGGTACTACTCAAACCTTTTCTTGGCATGTGGAAGTAACA  
 AGATTTAAGAGAAGCCATGTTGAGGGTAGAAGTTGTGGGAAGCATAGAGATGTTAGTAGTAGTAGTAGTAGT  
 TATTGGGGAACCTAACACCGGCTTCAGCTGAATCAGTGGAGAATGCGGCCT

>TCONS\_00075437

TAGCAAGTTAACAACAGTAAAAAACAGAGGAAAGAGAGGAACTACTATCATAACTAAGGGTTACTACTA  
GCCTGCCTTTGATTTTTTGCTATTGTTCAAAGTGTGGTCCAGCACACAACACTACAAAAGAGGGGTACAAAATAAA  
CACAGAGAGAGACCCCACTCTCATTAATCAGTTCATCTGTCTTTACGTATACATTATGTATTTGTTGTAAGTA  
GTATGGTATTGATGATGACAACAATCTTGAGGAGATCTTCCTTACCAATCTTTACTTCTGTTGTTGGTATACTTT  
GGCTATACAGCTAGAGGACTTTTACTTCTTGTATATGGTACTACTCAAACCTTTTCAAGCTAAGTTAATCCCTCC  
TAGCTAGCCTTGACAAAACCTCTTAACACCTACATTTCAATGGCTTCTTGCCAGAAAGTAAACCTTGGCATGTG  
GAAGTAACAAGATTTAAGAGAAGCCATGTTGAGGGTAGAAGTTGTGGGAAGCATAGAGATGTTAGTAGTAG  
TAGTAGTAGTTATTGGGGAACATAACACCGGCTTCAGCTGAATCAGTGGAGAATGCGGCCT

>TCONS\_00075524

GGGGCAGCTAGGTTGAATCATTATCTGGGTCTTCTTCAGTATCACTCTGTGATTGAGGACCCCAAAAATTTTGAT  
TCCAGGATGCTTGAATCAGAAGAGATAGGAATCATCGCGTTGTTGAAGTCCTGAAAATACAAGGCACTATGG  
TCTTCGTCATTACACGCTGTAACCTATTCTACATCCATCGACAGCCATTGCAGAACACCCCAAAGCCTGGAGGGG  
AATCACATTGAAGACAACATAATCAAAGAACATGTTTCGTCTACCATTCCCTGTCTCCCAAACATGTACTTCGAT  
ATCCTCCAGCCCACCACTAACAATTTTGTAGGGATCCATGTACAAGAGATTTACATTGCCTTTATGTCCATCTA  
ACTCCGCTACTGCTTCTCCCTTCTGTAGGTCACCGCCTCTTCTGACATCCCAGAGCATTGCTCTTTGAGCTAAC  
CCTGTGCAGACCAATGATTTCTCTGGCAACATTTGAAATGAATGTAATTCTTCTTGATGGTTCACTTTAAAGAC  
TTGACGCATTGTTCTTATATCAATTGCAACAACCGAGGAACCAGCCGCAACATAGATTAGTGATTCATGACAC  
TTCATTGCCTTAGGAGCGCCAGGCACAGTGCTCTTTCCACACAGCATGAAGAGCGAACAGCAGATGAAGTA  
GAAGTGTCCCAAACCATCACCTTGGAGTTCCTTGATATGCTCACTAGAAGAGATGTCTTGTGGCCGGCAACTG  
ACATCAGCACTACAGGTTTCTCATGCCCGTAAAGTGTTGCCTTTAAAGCTTGTTGGCCGCGCTTACCACTAGA  
ATCAAGGGACCATAATCGAACAGTTCATCTAAACCACCGCTTGCAAGTATATTACTAGGACAATCACCCAA  
CAATTTGTCTGAAAGTGTTGGAACTGGACCATTATGGCCTCTGAAACATCGCTGACAACGCCCCTTCCACCAT  
AGCCGAATTGAATGGTCAAAGCTTGAGGTTACCAAAAAGATTGTCATTTTTCTGCATCTTGCTACTATACAGGC  
ATGTCTCTTCAAATGGAATTAATCTGCAGTTAGTAGGATTATGGCTATTTCTA

>TCONS\_00075525

GGGGCAGCTAGGTTGAATCATTATCTGGGTCTTCTTCAGTATCACTCTGTGATTGAGGACCCCAAAAATTTTGAT  
TCCAGGATGCTTGAATCAGAAGAGATAGGAATCATCGCGTTGTTGAAGTCCTGAAAATACAAGGCACTATGG  
TCTTCGTCATTACACGCTGTAACCTATTCTACATCCATCGACAGCCATTGCAGAACACCCCAAAGCCTGGAGGGG  
AATCACATTGAAGACAACATAATCAAAGAACATGTTTCGTCTACCATTCCCTGTCTCCCAAACATGTACTTCGAT  
ATCCTCCAGCCCACCACTAACAATTTTGTAGGGATCCATGTACAAGAGATTTACATTGCCTTTATGTCCATCTA  
ACTCCGCTACTGCTTCTCCCTTCTGTAGGTCACCGCCTCTTCTGACATCCCAGAGCATTGCTCTTTGAGCTAAC  
CCTGTGCAGACCAATGATTTCTCTGGCAACATTTGAAATGAATGTAATTCTTCTTGATGGTTCACTTTAAAGAC  
TTGACGCATTGTTCTTATATCAATTGCAACAACCGAGGAACCAGCCGCAACATAGATTAGTGATTCATGACAC  
TTCATTGCCTTAGGAGCGCCAGGCACAGTGCTCTTTCCACACAGCATGAAGAGCGAACAGCAGATGAAGTA  
GAAGTGTCCCAAACCATCACCTTGGAGTTCCTTGATATGCTCACTAGAAGAGATGTCTTGTGGCCGGCAACTG  
ACATCAGCACTACAGGTTTCTCATGCCCGTAAAGTGTTGCCTTTAAAGCTTGTTGGCCGCGCTTACCACTAGA  
ATCAAGGGACCATAATCGAACAGTTCATCTAAACCACCGCTTGCAAGTATATTACTAGGACAATCACCCAA  
CAATTTGTCTGAAAGTGTTGGAACTGGACCATTATGGCCTCTGAAACATCGCTGACAACGCCCCTAAAAATG  
AATCCACAGGCAAACTTCCACCATAGCCGAATTGAATGGTCAAAGCTTGAGGTTACCAAAAAGATTGTCAT  
TTTTCTGCATCTTGCTACTATACAGGCATGTCTCTTCAAATGGAATTAATCTCATAGAAGTA

>TCONS\_00075573

GCCACCTCAGTCTTTGTCCATCTCTTTCACCCGCTTCAGTAGTAGATTGTGTGAAGACAGAAACCCAGAAAAA  
GCTCAAGAAAATCTAGAGCTGCTACCACCCCAATGGATTTGTTTAAATTTCTTACCAGAATTTCTGCTTCTACC  
ATACTTTTACTCTTCTTGCTTTCTTGCTTCAGCTTCTCTTCAACAGCTTCTGCATTATCTGAAATACAAGATTGA  
AGGAAATCAGTATAGTTGAGTCCCATGTCTGAACCAGTGA CTCTGTA CTTCGATCGTTTGTCTGTTGACTATGA  
>TCONS\_00075680

TTCATATTACTGTGCTCTGGCAACAGGCTCCAGTGCTTCAATTGTCACCACGCTATTACCTCGGATTACCACCA  
TGCCGATCTCATTCTTCTCATTGCCATTAACCTCAACAGTGTTGTCAATGACCAAATTCATGAACTGATCAAAC  
CCACGAAGAGTCCCCACA ACTAGGCGGTTGGCATTCAACTTGATTGGAGCTGCTTGTCCATATACTTTTTAA  
GATCCGGAGGCTGACCCGATCTGCTCAT

>TCONS\_00075724

GAGAAAAGGAGCTTCACAAGATTGAAGAGAACCCTCCTTTCACCACCTTTCGAGCACTTGAAATGCCATCTC  
AAGTATAAGCAAAAATTCTATCTGTAATTTTAGTCCGACAGATTGGACACTCGGCACAGGCAAGGGAACAAG  
ATTTACACACTGCAAATTAAGTCGACATTAGACATCTCCTACCAAGGGAGCGAGGATAAGCTGAGCACATAA  
TCAGAAAGTTGACTTACAGCAAAAATGTCTGGCAAGGAAGGAGCATCGCAGAACTTGGTGATTGAAACAGA  
CTTTACATACATGTGAATTTGCATCAACATTTCCCAAATATCTGTGCTCCTTTTCTTTCATCTCTTGCACTTAG  
CCTGGTGGCGCACAGGTAAAAGATCTTTAATATTCCATGC

>TCONS\_00075726

ATCTCAACCTTGGAGTACTTTGACAATCTCCCCGCTCTTGCCTCAATACCTTTCAGATACTCAATCAGAACTC  
GCTGCTGGTATGAACCTCCCTCCGTACGTATCAAAGTCCTTTCATTCTCTTCTTAATAACAGCATACAATTCC  
TCAGGTGAAATATCACCTTTTCCAATGGTCATGCCATCTATCAAGAGCTTGTTCATTCTTCCTCTGGTGCTTTG  
ATAATGCTCTCAAGAACTGTTGAGCTTTTAACACTTCATTTCCCTTTTTTTGCATAACTCCGCTTTGACAGCACT  
CTGGAAGCATACAATTGCAGAACTTTTTGTAACATAGCTTCAAGTCCTGGCTTGTCCCCGCTTTTTTTAGCTTG  
CCGCAGCTGTGCATTGACTTCTGAGAGGAACCCTTCATCAAGTTGGCCTTCTTGCTCCCTTTGATTTATTTCTTT  
CTCCATAAGACTGAGAGCCTCAGGATCCCTAACAGGCCAAGAAATTTCTTCTACTTCATCAAGCACAGGTTCT  
AGGATTGCTTTGAGCACATCAGTAGACGAGTCTATCTTTTCTTTTGTCTTGTGAACAAGACGATCTACGATGTT  
CATTACCGACAACGCCAGCTCCTCGTAGTCTTTTTTGTGATCGTCAGACTTGCAGGTGTCTGCTCTAGCTGCAA  
GTCTTATCCAAAAGCTCTCGTTGAAAGCGAGAACGTTCTCCACA ACTAGCTGTGGCAGTTCCTTATCACTTGC  
CTCCCTCAGTGTATCTATAAGCTTATCCACCTCCACAGTCTTTTTGAAAGATTCTCAGCATCTTTACTGACTG  
C

>TCONS\_00075727

ATCTCAACCTTGGAGTACTTTGACAATCTCCCCGCTCTTGCCTCAATACCTTTCAGATACTCAATCAGAACTC  
GCTGCTGGTATGAACCTCCCTCCGTACGTATCAAAGTCCTTTCATTCTCTTCTTAATAACAGCATACAATTCC  
TCAGGTGAAATATCACCTTTTCCAATGGTCATGCCATCTATCAAGAGCTTGTTCATTCTTCCTCTGGTGCTTTG  
ATAATGCTCTCAAGAACTGTTGAGCTTTTAACACTTCATTTCCCTTTTTTTGCATAACTCCGCTTTGACAGCACT  
CTGGAAGCATACAATTGCAGAACTTTTTGTAACATAGCTTCAAGTCCTGGCTTGTCCCCGCTTTTTTTAGCTTG  
CCGCAGCTGTGCATTGACTTCTGAGAGGAACCCTTCATCAAGTTGGCCTTCTTGCTCCCTTTGATTTATTTCTTG  
AATGTTAAAGTAAATTTCTCCATAAGACTGAGAGCCTCAGGATCCCTAACAGGCCAAGAAATTTCTTCTACTT  
CATCAAGCACAGGTTCTAGGATTGCTTTGAGCACATCAGTAGACGAGTCTATCTTTTCTTTTGTCTTGTGAACA  
AGACGATCTACGATGTTCAATTACCGACAACGCCAGCTCCTCGTAGTCTTTTTTGTGATCGTCAGACTTGCAGGT  
GTCTGCTCTAGCTGCAAGTCTTATCCAAAAGCTCTCGTTGAAAGCGAGAACGTTCTCCACA ACTAGCTGTGGC  
AGTTCCTTATCACTTGCCTCCCTCAGTGTATCTATAAGCTTATCCACCTCCACAGTCTTTTTGAAAGATTCTCAG  
GCATCTTTACTGACTGC



>TCONS\_00075778

GTTCTGGAGATTTTCTCTTGGTTCAGTAAGGTCGAAATTTTCTTGCAGCCCTCAACTGCTGTATCCGCTTCTTAT  
CCTGTTCAAATTTGCTCTGCAGCACCATGATCTCATTTCTTTTTGCTTCTCTTTCTGAAATCGGTAGAAATCTA  
ATCCCACATCGTTCTTTTTCTTTTTGGCCATATTATCCATAACAGCAGTCTGAGAAACAGAACCAACTGCAATT  
CCAGTTTCAGAATCTGTTGTCTTCTTCTGCCTTTGTGGTGTACAACAACGGTCCATCCACCTTCAGCAGCAGC  
GGCTTCTTTTTCTTTCTTTCTTCTGTTCTTTTTTCGCCTCATGATCAGTTATAAACTCATCAATCCTTTCTTGCAAC  
ACCTTTATCCCTGGCCTACTCTGATAATAATCTGTAACCCACTTTCTCACTCCTTTAGAGTAATCCTCGTCCCTT  
GAAGATAGCTCATAAATCTCTTCATCTTCAGCTTGTCTGTCTTCTCTGACAAATCATCCTCCGCTATTGAAGA  
TGGACGATCCTTC

>TCONS\_00075787

AGAAAAGAAAAGGAAGAAGAAGAACTGGCACTGCAAAACAGAAGAAGCAAGGATGAAATAGATGAATG  
CCATCTATCATATGATAAAGATGGGAAAACGAAAAAGAGCAAATCATCAAAGCAGAAGAAGAGGAAAAAT  
GACACACTTGCTGAAAGTGGTGTAGTGGATCAATCTAATGACGTAGTGGATAGGCTTGGTCAAGAAAATACC  
ATATCAAAT

>TCONS\_00075848

TCCTGCTCACTGTAATTAAACGGCGGAATATTGCCAACAAATTCACCTTTACAATGGAAGGCTAGCTTAACCTC  
TTGACCCAATCACTGCTGGTTCCATTTTGATCACCTTAGTTTTTCTATATTCTGTAAAAGCTCCAAGTCCCCAA  
CAAACTTAGGTGCGTCAATAAATTGCCAGAATAAGAAGCAAAAGAATCGGTCTGAACTACATTTCTTAGTT  
AGGTAGCCATCTCATCAACTTCAGAATGAAATACAAAACCTTGGAAAAGTAGTAGTTATATCCCTCAGATATG  
AAAGGGTCATTATTTTCAATAATGAAGGATTTGCGCCACAAAATTGTGCCACTCAGAGTTGTCAATCTTTCC  
GTCCTGATTTGAATCTGCCTCCAAAAATGTCTTATCCAGTATTATCTCAACGATCTCGTCGGCCAACCTTCATCT  
CAGACTCGCATAAAATTGCAATTAACATTTGCTTAACCTCTTGCCGCTCAATGAACCCCGTGCCATCCAAATC  
ATAAAGCCTAAATGAAAAATTGATCTTCTCTTCTTGTGAGGCATTTGGGTGGAACATTAAAGTGCCCTTACA  
AAATCACCAAAATCGATAACTCCTTTTTGCTTTACATCAAAGAGATCAAAAATCCGATTTGCAAAAAGGTTTT  
CTTTCTTTCTGTTCTTGAATAAAGCCAACCTGAAATTCTTCCTTGCTAATTAGCCCATCATCAATTACCGAACCG  
CTAATATTCTTGAACAGCTCAAACAATGCTTCAACTTCGCTTACACTAAAGGCTGTTTGAGATGCAAGGACTA  
CAGGATCTTCGTGTCCAGGGAAGTCTTTTTGCTGTAGACTGGAAACAGCCCATCTACTAAAGAAGGACGA  
CAAACGAGGAAGAACACGACTAGACTAGTACCGAGCAACCAGCTTCTCTACAATATATCGTTCAAACCATCT  
TATCCATGCAATTACA

>TCONS\_00075855

CGTATTGAATGTATCTCCTTTGTCCCATACGCTTCTATTCTGAATGTTCTTTTAATTGTGAACCTACAGGGAGCC  
ATTAACCTTACTCATTGATGTCTACAAGAAGGAATTTGTCAATATGGGTGGCTATCTTACTAATTCTTGTTAGGT  
TAATTTGGAGAGGGCGGGGCACCTTTATACAAGCCATTGGTTCTTATGAGAATGCTGTCTTTAGGAAGCGTATC  
CAGTTTACTAGAAGCAAATTTTTGAAGACATACAGATTAACCATCATTTTACTGGGAGTTTCAAGAAAATTTT  
CATTACAATCGAGGGATATTAGTGATATGTAATTTTTTGCTAAATTTTTATGAACACAATATTGTGATTAGCTT  
ACATTATTGATGTA

>TCONS\_00075984

GAACCACCTTTTTATCTTGTAATCCTTATCAAGATGTGCTAATCGTAGGTTTATATGATTCATTAAATTCAAT  
GCGACATCATCACTGAGCGGCCCACTTGGAACAGCACCTAAGTTATGTCTGCCAAAAAGCTTCCTGATAGTG  
ACGTCTCTTTCATTCTTTAACACCGCAAGAGCTTCAGCCTCAGCTTGAAGCTTGCTGATCTCCACGATATAGTC  
TGTCATGGACTGCTTAAGAAGGGAAGTCTTTGTCTCTGAGTCATTCATTTCCCTCTCCAACCTTGCTAATTTTCGA  
TTCCAGAAGCGCTATCCTTTCATCAAACCTTTGTTTTCCATTCACTCAGCTCTTCATCAGTGTCTTCATTCTCCTCT

GCAAGTGCTGCATACTGTTTTCTGTTTCCTTGAACAATGTTTTCTTTCAGCAGTTTTGGTGGCTATCTCTCGC  
TGCAATTGATGAAGGTCCTTTAAAGTTGCTTCAGTATGGTGGGTCTTACTCTCTAGAGTCCGAATCTCTTTTTC  
AAGCTCCTCCATCTGACTTTTCAGTGAAGTTCGGTTTTCTCTTTATCTT

>TCONS\_00076237

ACACACTTGAGTAGCACCAGTTATTGCGGTAGTGCTGCCTGGAAGAGCTCGCTTCTCCTTGCTTTCTCTATACA  
TCTTGAATCAAAGGTGAATATAAAGAATGAAACAACAGCTTAGGAGGATCTGCAATTAATCTGAAGTGCA  
GCTGCTATGGGAGCGGCGAGGCTCAGAACCTCAAATGGCTTTCTGTCTTTCACCTCCTTCACTGTTTCGAGGGC  
ATGAATCTGTGATCCAGAAGTAAGTCATCCCACTCTCCGGACTACCTCCTTTGTCTGGTTAAAACGCTGCCA  
TGATCTGTTTGGAATAATCCGTGGGTACATAAGCACTTATTTTTGAGCTCCATGTCTAGCCAACACTTTCT  
GGCATTCTGTTAGGGTGCCACCTGATTGTACAAGATCATCCACTATCACCACATGACGTCCGGCAGGATCTCC  
CTCCTTAATCCGTACAATTCGTTGATCACCTTCCCTAACTTTAGCACAGACAATCATTGGAAAATGCTGAAGC  
TGCTTGTGAAAACGTTTCCATGCACCATCATCAGGAAAAGCTATAGATATATTGTCTAGAGTCAGGGAGTTGTT  
GTAGCCTATTCAGAAGCAACGGGATCCCGCTCTCGAAGCATGGTAGTATATTGTCTCCAAAGTAGAACCTCTC  
CTGCAAGGCATGGATATCAAAGGTAATACTAACTAGTTGGTCCTCCTCGAGGAACTGGGATGTTTGACAAAAT  
CCTGGCAAGCGTAAAAGCTGTGGCAACATCACCTTCATCTCCATACGCTCAGATGTGCCGTTGGGAAGAA  
CGGAAGGACAAGTGTGAATGAGGAAACGAAGAGCTTGGGCAATGCATAAATAACTGATAATTGCTCAAAAA  
TCACTCCAGGAGAACTAAATGAAGCCAGGAAAGCTGCATGCTGTCCACGGATGCCATGAGCATTAGATATGA  
ATAGGTTTGGGAATCCATCTTCAAAGTCTCCAAGTGATACTACGGAGCTCAATGGCATCAGATTGAGAAG  
CAATTCGCTCAGCAAGATCTTTCATCTCATCGCAATAGAATAAGCAAACCTCTTTTCGAATGCTTACCAGCAGG  
ACCCAAAGCAGCAGCTGCAGACATTGGGATTGAAGGAGGTTTCAAGAATAATATGAATTGGATCAGTCGCTGA  
TACACAACCCACCGTCCACCTTTGGTTACTCTCAAATTCACATCGAATGGAAAAATCCTTATTACGCTTGAAG  
GATCGCGAGAGGATAAAAGTGGAATTATGGAATTTGTCAAGAGTTTTTGAGCAATGTGAAGAGAAGACGGG  
CGGCAACGGCGACGGCGGAGTTGTGGCTGACATGGGGTGGAAAGTGTG

>TCONS\_00076257

TGATATCAGCAACATGCCTTGAACCTTGACAATACAGGGAGCTAGTTACCATGACCCACCGCACCAGCAGT  
TGGATTTTGGAAGCAGAGAAATTCCAGAAAGTCTTTAATGAGTATGGCTGAGAAATTGTCCTCCTCTTCC  
GTGATTTTTCGAATCTGAAGCTTGTGACTGCAGATCTATCCCTATACAGAAGAACACGCATACATTTCTCCA  
ATAACTTAACACCTTCTTCATAGCTCAAGTCTTCGCGCCATTCATCACGGATAATGGGCTTTGCAAGGTGATTT  
CCAAATCCAGTTGCCGCGTGATTGTCTCATAATGGACACCAATCATACTAACCCTTCCAAGATACTTCTGCC  
CATTTTTACCCCAACCAAGTACAAGGGAATTCATAGTGGGTTGAACTTGTTCCTTCGATTATACATCATGCG  
AGTTAGATAATTATGCACTTCTTTGGGACCCAAGGAGTTTCCATCATCCACATGTTGTCATACAAGATAAGCT  
CGTCAAGGTTCCGCAATATCTCCTGAAAATCACTAATTTCACTACTTGCGCCAAGAAGGGAGTGTTCCTCCAC  
TGACTTCAATCGCTCCACACTCTTGTAAACGCAACGTTGAACCATAGGAACCTCCCATATCAGCAGCCAACAG  
AACACCATCCTTGTACTTGATGCCGATAACTGATGTCCCCGTCACATATGGATACTGTGTTCTCTGAATATCAG  
CTTCAGGGCTCAATAAACTACACTTTGCCGGTGCAGATTCCATCAACTGCGAAAAT

>TCONS\_00076266

CTTATTTTGTCTTTATTGTATTGTCCTAAATTTTGCAATAAAAAAAGTTTTCGCGGGCGAATATTGACTCTTTC  
AATCCCTATTTTCAATTTGTAGGGTTAACTCGTGACTTCTCAGATCTCCGAATACATGAATTAATCTCTGGTTTCGTT  
CCGCCATCCCGACCAGTGAATCATTAAAGATTCCTTTTTCAATAGAATCTTTTGCATTACAAAGTTCCGTCGTTT  
CCATCACTTCTTACTTAATGGTTAGGTCCGAATTCTACAATGGAGCTCAGAATGAAATTGGTTCTTGAGTCAAT  
CTTCTCAGTCTTTATTGGCTCGAAGCTCTTGATTTTTTGTCTATTCTATAAGAAGATTCATTTTATTATGGTAT  
GAATGCGTATTGATGCTTTATTACACTGCCTTTTATGAGATTACTCATAGACCTTACATATTGGAATTTTATATC

ATTGGTATTCTTTTTCTCTCTTTCTCTCATCCTTCCATTTATCCACATCTTTTTGTCTATTTTGCTTTACAACCTTA  
GAATCAGATTTTCCTTTTTTGTTTATGCAAAAGATTTTCAGTTGCTACAAAGATATGACCTATATATCATATCTTG  
ACTGGTTCTTTAGATCCAGATAATGCCAAGTGATGGGTTGGTTATTAGTTCTATAGTTTTAGTTCATACTATGT  
GGGCTGGTCTTTTTTAATCCTAACCTAAAAAACCAACGAGTCACACACTAAGCATAGCAATTATATCAAATG  
GTCAATCAAATTTTTATTCAACCTTATAGAATTAAGAATTATAAATGTTCCCTTGATTGATTAGAAAAAGAA  
TGAATTTTTCTTTTTTGTTCAATCATTGGATAGAAGGGAAAGACAAGTAGTAAATTTATTCCTCGTCTAGAAA  
TATCCAAATTTTGATGCCCAATACTCCATAGATAGTTTGAAGTGTATAAGAGCAATAATCAATTTTCGCTCGA  
ATCGTTTGTAGGGGAACCCTACCTTCTCTGATCCATTCGACATGTGCAATTTCTTTT

>TCONS\_00076375

AAATACAAATACAAATACTATAGTCATGAGAAATAAGTGGAACAAGAAAAAGTAAAAGGGGTTGATTTTTT  
TGGATTTTAGGAAGCTTCTTTGCAAGTATAAAAAATCAAAGGGTGTAAGTGTCTCATTCTTTTTCTTGAATT  
CCATAAGATTTGATTAGTTTCAATTCTCTGGCATCTTCTTTAAATTTTATTGCTGGATTTGTACCTACTAAAGA  
TATATTTATTGGAAAGATACCATAAAAAAGGATTGCTGCTGTTGATTTTTCTCTCTACTGTGTACTGA

>TCONS\_00076396

CTATATCTTGTAGGATCGCTAAGAGGCTCCCCCTATCCTGGAAGAAGTTTAGAATTCGGATCCATCGGAGTGT  
TAACAGGTCTACAACCTGTCAATTCCTGTCTCCTCAAGAATATCTAAGGCATACTTCCGTTGTGAGATCACAAT  
ACCTGAGCTAGACTGAGCGACCTTAATACCCAGAAAATACTTTAGTTTGCCCAAATCCTTAGTCTGAAAGTGT  
TGAAATAGATGTTGCTTCAATT

>TCONS\_00076397

TATCACTGTAATCGAGCCCAAATATTTGAGTATATCCCTTGGCAACAAGACGAGCCTTAAGACGATCAACCTT  
ACCATCCGGACCAACCTTGACTTCATACACCTAACGACAACCAACAGTAGATTTACCTGAAGGAAGGGGGA  
CGAGCTCCCAAGTACCACTCGTATGTAAAGCAGACATCTCGTCAATCATAGTCTGTGCGCCATCCTGAATGAGA  
CAATGCTTCACTTGTAGACTTAGGGATGGAAACAGAGGACAAAGAAGATAGAAAAGCATAATAGGGTGATG  
ACAAACAATGATAACTTAAACCGACATAATGGGGATTAGGATTAAGGGTGGTCCGTATACCTTTCCAAAGTG  
CAATCGGTGTACTAGGAAGAGACAAGTCCGCAGTATGAGCAGGGTCAGGTGCATGACGTGAATCAGCTGGG  
CCTGATGCTGGGTGCGG

>TCONS\_00076408

ATGGAGAAATTGTCTCCTATCCTCCTGTCTAATTGGAAACCAACCTCTTTGCCAAGACTAAAACCAA  
GCTCAAATGCCACTCGTTTGGCAGTTGCAAGTACTGCAACACGGCGTGGTTGAGTCACACCAATAATACCAC  
CACGACCATTGGAATGATTTGAACCATAGCCAGCTTCATAAAGGAACTGAGGAACTTGGGTTGTCTTACCAC  
AACCTGTCTCACCACAAACTATTACACACGTGTTCTCATTATAGCTTCCATTATCTCCTGTTCCATCATGACT  
ATCGGCAGATCGCTCCTCTTATTTTCAACCTCCTTGGTCTTGAAACGTGCACCACAGTTGGAGTTGCTAAAGC  
TCTTTGAGGAAGA

>TCONS\_00076413

TGACTTTAAACATTCTGTAGTTCTATCCTCTTCTTGCTTATTTTGCACCGAAGCATCTCCTCCGCAAACCTAAAA  
GTCCACTCTGAGAAGTCAACTCTTCAGGAGACCCTGGAGTGACCAGTGCTTCACTTTGTACTTCACTTTTTCTT  
AAGGAGGACTGCAAAAGATTGCTATTGACTATTGGACTCGACTTCATTTTGTTAGAATCATCCAAGACATCAC  
TAGTTAGGCTGTTGGTTGTCTCTTCTTGACTGGTCGATCTCTATGTGGCATTCTAACCCCGCCCTAGAAAAC  
TGCACTTCTCTCATACGCTTCTCTCGGCTAGTTTCACCCTGACCCAAGTTCCTTGAAGACCACATAAGTGAATA  
AAGATCATCTTGGATCTGATACTTCCTGAAATGGGAATTCAAGGTCTTAATGCTTTCAGCTAAAAGGATTGAT  
TTCTCCTTGATTCCTCGAGTTTCTTCAGCTTTTTTTTCTGAGATTGACTTAACTTAATGTTATTCTTCGTTTTAAG  
CTT

>TCONS\_00076414

TTGCTGATAATCTGACTTTAAACATTCTGTAGTTCTATCCTCTTCTTGCTTATTTTGCACCGAAGCATCTCCTCC  
GCAAACATAAAAGTCCACTCTGAGAAGTCAACTCTTCAGGAGACCCTGGAGTGACCAGTGCTTCACTTTGTACT  
TCACTTTTTCTTAAGGAGGACTGCAAAAGATTGCTATTGACTATTGGACTCGACTTCATTTTGTTAGAATCATC  
CAAGACATCACTAGTTAGGCTGTTGGTTGTCCTCTTCTTGACTGGTCGATCTCTATGTGGCATTCTTAACCCCG  
CCCTAGAAAACCTGCACTTCTCTCATACGCTTCTCTCGGCTAGTTTCACCCTGACCCAAGTTCCTTGAAGACCAC  
ATAAGTGAATAAAGATCATCTTGGATCTGATACTTCTTCAAGGTCTTAATGCTTTCAGCTAAAAGGATTGATTT  
CTCCTTGTATTCCTCGAGTTTCTTCAGCTTTTTTTTCTGAGATTGACTTAACTTAATGTTATTCTTCGTTTTAAGCT  
T

>TCONS\_00076486

TGTTTCTGGATCAACTCAATGATTGGGAACTCACCTGTCTATCTACTTTTGGATTACTTAGGATCTGTATAGA  
GGTAAATATCCATCCCATCTTTGTATTTTTTCGTTGTATGGGTTTCTCTTGTAATGGACATGAATTGTTGCTTCT  
ATCATGAAAGTAAGCACATCTGAAACTCATATGTATTTGTGATATTACGCTTGCGTAATTGTATTCTGGAATG  
AAGTGGGATTGTTGTAAATTTACGGGATAATGCATTGTTTCGTCTGGACTAACGGTAATCTGGAAAAGAAATA  
GGAGCTTCCCAG

>TCONS\_00076866

GAGTAGTGTTGATATAGAGAGGATGCTAATACGTGGATCCCAAACCATGACAAGCAGCATCGCTGAGGTTCC  
ATACGCGATTGTAGCAAATGGTAGGCGAATAATATGCTTCAGTTTCTGGCTGAAAATATAGTACCCCTGTAGC  
CGTATTTTCTTAACTTGATAGACCAGATATTGCTGAAAAATGCCTGTGACAACAAGGAGGGCAACATTACAA  
CTGCAAGAAGTGGGAACACTAATCCTTCTATAGGGTGAAATATCCATGTAGCTCCCACCGCCAAAATAGCA  
AAGCTTGCCAATAAGAAAAAGTAGAAAATACTCCCAATAAGGCTCGTAGGCTTCTATGACCGGATAGAGG  
TGCTTCATGCAGTACGTCCACAAACAGATTATTTTCGTCTGGGGATGCAGAGATTAAAGAAGACTGTATTTCC  
GTTGACATCTTCTTCTAAATCTTCTTTTCCATATTTCCAGTTTAAAA

>TCONS\_00076867

CTTTTCCATTTCCAAAGCACGTTCAAGCTTAGCTGCTCGGCTGCTCCATTCTCCCAGAATAGCTCTAAGTCTCT  
CATTTTCTTCTACATACTGATTATTTGCATGGCGAATACGTTGAATCTCAGTATCCTTCTCCTCTATTATAGATC  
GAGCAAGCCTCAGCTCAGATTGCAATTGATTCATCTCAGCTTTAAGTGTGCGTAACTCTTGATCTCGAGTTGCC  
AATAAGTGAGCAAGATCAACCTGAGGTGCATTCCCATCATTAGATCTTTCGTATTTGCTTAAGGTTTCTTGCAG  
TCTAAGAATCTCCTCACTCAAAAAGTGTATATTTTCTTGCTGATATTGCAACAATGCCATCTGCTGATCTGATA

>TCONS\_00076941

GTTCTTTTCCCAAATTAAGAGATTATGTGGGCATTTTAGGGTTGTTCTTGGGCTCAGAGGGGGTTTTGACGAAA  
AAAAGAATTTAGTTTCTTCAAAGGGTCCGTCTTTTCTACTCCAATTTGGTGGGAAAACCTGAAGGTCAACAG  
CAGAGCAGCAGCAAAACGCTTCCTTTTTCGATTCAAATACTCATTTGCACATTTGGAGTAGATTTTTCAGGTGCG  
GGGTGGGGGGTGGCCTGCAGAAGATAAACTGTTTGGAACCTGTGGATGAGTAGATGACAGGGTAATCTGTAT  
TGAGTCTTTGGAATGC

>TCONS\_00076999

CCTTCGTTGAATACACTCTCTCATGAGATTCATCGAGAATCAAATTTGTAGCCTGGTCAAATCCTCTTAAACCT  
CCCCTATATTTTCGCCCATCATTTGTGATAACTGAGATGGTTTGATCGACAAGAGACTCAAGCCCAGGTCCAC  
TAGCCATGTTGCCAAATCAGAAGCAATTTACTTGTGATCTTACAGTAGACTGATGCTTAAAC

>TCONS\_00077169

ACAATACGTGCTTTGTCCCAATTACATTATACCGGCACAGACCAAGTAACCAGCAACTTTGTTCTCGAAACT  
ATAAGGGAACAACAGTTGTTCTGAAAGCTTGTGACCATTACCGCTCTTCCAGTCACCTGAAGCCAGATGGA

GCAGCCTGAGCACCTGGTCCGGCTTTCTCATAGCTCTAGATTGGGCGAGTATCTCATCATAGTTCCTTTTCTC  
 AAATGCATTGTCTCTTGAATCGATTATCTTGTCTGCAATGCCATAGTCAATGGCTTCTTGTGCCCCGAGATATT  
 TAGGGCGTTGAATATCTTTCTCGATTTCTTCCTTTGGTTTTCCAATTCCTTTTCGCTAATAGTTCAAGGTAATAAT  
 CAGTGTGTTGCATCTAGTTCTTTGGCCTTGATCCACATATCTATCACTGCTCCACTGGATTTGCTGACTTTAGGTA  
 AATACAATTTTGTAGATGAATTTGGCTGCATAGCACGGAACCCCTTCTTTCCCAGTGACAGAAGCATTGCTGC  
 TTGACCATATGCCATGCCACAGTTCCTGTATAGATATCTGATTTGCAGTATGCCATTGTGTGTCAGCGACGGCA  
 TACGCCTCTGTTTCAGAACCAACAGTCTCCATCTTCTCATTCTGTGTGCCTGATGAGTTTATATATAGGTATAT  
 AGGCTTTGATGGATTGTCATAATCCAACCACATAAACTGAGCAACAAGTAGCTCTGTAACAGCTGGTACAAT  
 AGGCATGCCCAGATAGACAATTTCGAGCATCTAAAAGCAAAGATGGCAAATCAGGAGGGCGCAGTTTCGAGGTC  
 TTCCAGATCCTCTTGCTCCTCCACGGTACATGCTGACGCTCATGCTGTATTTTCGAGGGGCCCCGATCATTTCATG  
 CCAGACATACTCCACATTCCACCATTGCTCAGATAGTTATTGGCTGAAGATATACTATCCTCAGTGACACTTT  
 CTGACTGTGCGCCGGGCTGGGTTATCTTCTGTCATGAACATATCCATCTGTGAAGGACTAAGGCCATAAAGATA  
 CTGAGGGGCACTTTTATAGTTGTCCAGTAGTCCATCTTTGAGATTTTCTGTCTGAATTTTGGGGTATATGGTC  
 CAAAGACTTAGCTACCGGAGACCTGTAACAATAACCTCGAACGCCGTTTGGCCTGCGACTGTGAACAGAAGT  
 TGCAAAGGAGAAATTGGGATTGGATATGAAAGTTGATTTACCAGAACCAGCTCGTGATTTTCAGTAATCGTC  
 AAGCTAGAAAGTGGAGAGAGAAGCAAAGAAGAAGCCATGGTTACGTTTTTGT

>TCONS\_00077198

TCTGGGTTTATACCAAATCGACCGTAGAGAGAGTTCATTAGTATCTTGTAGATATATACCATAGCTGCATCAT  
 CCTTTATCTTTGCTTCTTGTCTTCTAGCGAAGATGTCTGATACAAAGCCTTCAAAGGACTCTTCTTTTCTCAT  
 ACAAGTAGCCCTTAGCGGGAAAATTCTATAACCCAAGTTTCGGGCATAAAAAAATTCTTCGCTAAAATAGA  
 CGCCTACGAATTTACCTGTTGGGAAGGTTAAAGCATTATGTCTATCCTTATAGGGTAAGAAGGCTTTCTCTATT  
 GTAGAGAGGACACACTACAAAAGCCTCAATAAAGCCAAAGAAGTTATCCAATTCGCCTTTTCTAAATTATT  
 ATGCCAGACGTCCTGGCCTGGGAGCCCCGTTTCGCCTGGCATCGGAAAAGTTTTCATTATAAATGGATATAAG  
 GAGTTCACATCGTAATAGTCTAAATTTTAACCATAGGGCTTATAGACATCGGCATGTCTCCATAATAACCAC  
 GCCGAATGAAGCGTTCTTGGTTTCGAGTTGGTATATGGATGGGCCAACTCTTTGGGTCGTAATAGTGCATACG  
 AAAGATTGATAGAGCTAGCGATGACAACGTTATTGTATCAACGATGTCTATTTTGTACAGATTCCAATAAATC  
 TCTTGTGCCTTCAGCATAACGCCACCTAAGAGACGAATATCTTGTTCAGATAAGCCAACAATTGTTGACCTA  
 TCTCCGGAAGATACTCAAGTCGTAATTTCTCATAGGGAATGGTGCCTTTAGAACCAAATTTTCGGGCATAAATC  
 CTGGGCCAAGTTATTTAGCGCAGCGGGAAGGAGAAGGTAGGAATCCCTTATACGGAACAATAATTTCTTTTTT  
 TCATTTCCACGATAGACTTTTAACTCGTACATTTTATGCTTCCTCATCACCGTTTGAAGGAGTACTTGCCGAT  
 CTGAGAAGTAAAAGCTCTCGTTACTATAATGCCATCGTATCGTGAAAAGTTATGGAAATAGACCGTTTCAATT  
 TCTTTTTCATCTGATACCACAGCCGCTAAACGCTCTATAAAGTCGAGCATCATACGTTCACTTCGTTTTTTGAA  
 ATCTGATATTGAGAAATCGTTATCTTCACTGAAATATGTTTCAATATAATATTCAGACTTGGAAGCAAGATCTT  
 CACCCGGCTTAACCACTAAGAACCCCACTGCGCAAGGAACATGAACATCGTCGTGGAGAGCAGCCTCTATAT  
 CGGCAACAATGAATGGGCTCCTTTTTATTTTCTTAATTGCTTTTCAGTGCGAGTATATGATCGGGACGACGACTC  
 TTCTTACCCATAGCTACCACTTCTACAGGTTTCATCACTCATTGTCCCGCCATCCGTTAATTCATCACAAAGTTG  
 CTTAAAAATTTCTCTAGGCTAAAAGGGTGGACTTC

>TCONS\_00077199

TCTGGGTTTATACCAAATCGACCGTAGAGAGAGTTCATTAGTATCTTGTAGATATATACCATAGCTGCATCAT  
 CCTTTATCTTTGCTTCTTGTCTTCTAGCGAAGATGTCTGATACAAAGCCTTCAAAGGACTCTTCTTTTCTCAT  
 ACAAGTAGCCCTTAGCGGGAAAATTCTATAACCCAAGTTTCGGGCATAAAAAAATTCTTCGCTAAAATAGA  
 CGCCTACGAATTTACCTGTTGGGAAGGTTAAAGCATTATGTCTATCCTTATAGGGTAAGAAGGCTTTCTCTATT

GTAGAGAGGACACACTACAAAAGCCTTAATAAAAGCCAAAGAAGTTATCCAATTCCGCCTTTTCTAAATTATT  
 ATGCCAGACGTCCTCGGCCTGGGAGCCCCGTTTCGCCTGGCATCGGAAAAGTTTTCATTATAAATGGATATAAG  
 GAGTTCACATCGTAATAGTCTAAATTTTAACCATAGGGCTTATAGACATCGGCATGTCCTACATAATAACCAC  
 GCCGAATGAAGCGTTCTTGGTTTCGAGTTGGTATATGGATGGGCCAACTCTTTGGGTCGTAATAGTGCATACG  
 AAAGATTGATAGAGCTAGCGATGACAACGTTATTGTATCAACGATGTCTATTTTGTACAGATTCCAATAAATC  
 TCTTGTGCCTTCAGCATAAGAGACGAATATCTTGTTCAGATAAGCCAACAATTGTTGACCTATCTCCGGAAG  
 ATACTCAAGTCGTAATTTCTCATAGGGAATGGTGCCTTTAGAACCAAATTTTCGGGCATAAATCCTGGGCCAAG  
 TTATTTAGCGCAGCGGGAAGGAGAAGGTAGGAATCCCTTATACGGAACAATAATTTCTTTTTTTCATTTCCAC  
 GATAGACTTTTAACTCGTACATTTTATGCTTCCTCATCACCGTTTGAAGGAGTACTTGCCGATCTGAGAAGTA  
 AAAGCTCTCGTTACTATAATGCCATCGTATCGTGAAAAGTTATGGAAATAGACCGTTCGAATTTCTTTTTTCATC  
 TGATACCACAGCCGCTAAACGCTCTATAAAGTCGAGCATCATACGTTCACTTCGTTTTTTGAAATCTGATATTG  
 AGAAATCGTTATCTTCACTGAAATATGTTTCAATATAATATTCAGACTTGGAAGCAAGATCTTCACCCGGCTT  
 AACCCTAAGAACCCCACTGCGCAAGGAACATGAACATCGTCGTGGAGAGCAGCCTCTATATCGGCAACAA  
 TGAATGGGCTCCTTTTTATTTTCTTAATTGCTTTCAGTGCGAGTATATGATCGGGACGACGACTCTTCTTACCCA  
 TAGCTACCACTTCTACAGGTTTCATCACTCATTGTCCCGCCATCCGTTAATTCATCACAAAGTTGCTTAAAAATT  
 TCCTCTAGGCTAAAAGGGTGGACTTC

>TCONS\_00077200

TCTGGGTTTATACCAAATCGACCGTAGAGAGAGTTTATTAGTATCTTGTAGATATATACCATAGCTGCATCAT  
 CCTTTATCTTTGCTTCTTGTCTTCTAGCGAAGATGTCTGATACAAAGCCTTCAAAGGACTCTTCTTTTTTCTCAT  
 ACAAGTAGCCCTTAGCGGGAAAATTCTATAACCCAAGTTTCGGGCATAAAAAAATTCTTCGCTAAAATAGA  
 CGCCTACGAATTTACCTGTTGGGAAGGTTAAAGCATTATGTCTATCCTTATAGGGTAAGAAGGCTTTCTCTATT  
 GTAGAGAGGACACACTACAAAAGCCTTAATAAAAGCCAAAGAAGTTATCCAATTCCGCCTTTTCTAAATTATT  
 ATGCCAGACGTCCTCGGCCTGGGAGCCCCGTTTCGCCTGGCATCGGAAAAGTTTTCATTATAAATGGATATAAG  
 GAGTTCACATCGTAATAGTCTAAATTTTAACCATAGGGCTTATAGACATCGGCATGTCCTACATAATAACCAC  
 GCCGAATGAAGCGTTCTTGGTTTCGAGTTGGTATATGGATGGGCCAACTCTTTGGGTCGTAATAGTGCATACG  
 AAAGATTGATAGAGCTAGCGATGACAACGTTATTGTATCAACGATGTCTATTTTGTACAGATTCCAATAAATC  
 TCTTGTGCCTTCAGCATAAGAGACGAATATCTTGTTCAGATAAGCCAACAATTGTTGACCTATCTCCGGAAG  
 ATACTCAAGTCGTAATTTCTCATAGGGAATGGTGCCTTTAGAACCAAATTTTCGGGCATAAATCCTGGGCCAAG  
 TTATTTAGCGCAGCGGGAAGGAGAAGGTAGGAATCCCTTATACGGAACAATAATTTCTTTTTTTCATTTCCAC  
 GATAGACTTTTAACTCGTACATTTTATGCTTCCTCATCACCGTTTGAAGGAGTACTTGCCGATCTGAGAAGTA  
 AAAGCTCTCGTTACTATAATGCCATCGTATCGTGAAAAGTTATGGAAATAGACCGTTCGAATTTCTTTTTTCATC  
 TGATACCACAGCCGCTAAACGCTCTATAAAGTCGAGCATCATACGTTCACTTCGTTTTTTGAAATCTGATATTG  
 AGAAATCGTTATCTTCACTGAAATATGTTTCAATATAATATTCAGACTTGGAAGCAAGATCTTCACCCGGCTT  
 AACCCTAAGAACCCCACTGCGCAAGGAACATGAACATCGTCGTGGAGAGCAGCCTCTATATCGGCAACAA  
 TGAATGGGCTCCTTTTTATTTTCTTAATTGCTTTCAGTGCGGGTATATGATCGGGACGACGACTCTTCTTACCCA  
 TAGCTACCACTTCTACAGGTTTCATCACTCATTGTCCCGCCATCCGTTAATTCATCACAAAGTTGCTTAAAAATT  
 TCCTCTAGGCTAAAAGGGTGGACTTC

>TCONS\_00077201

TCTGGGTTTATACCAAATCGACCGTAGAGAGAGTTTATTAGTATCTTGTAGATATATACCATAGCTGCATCAT  
 CCTTTATCTTTGCTTCTTGTCTTCTAGCGAAGATGTCTGATACAAAGCCTTCAAAGGACTCTTCTTTTTTCTCAT  
 ACAAGTAGCCCTTAGCGGGAAAATTCTATAACCCAAGTTTCGGGCATAAAAAAATTCTTCGCTAAAATAGA  
 CGCCTACGAATTTACCTGTTGGGAAGGTTAAAGCATTATGTCTATCCTTATAGGGTAAGAAGGCTTTCTCTATT

GTAGAGAGGACACACTACAAAAGCCTTAATAAAGCCAAAGAAGTTATCCAATTCCGCCTTTTCTAAATTATT  
 ATGCCAGACGTCCTCCCGCCTGGGAGCCCCGTTTCGCCTGGCATCGGAAAAGTTTTTCATTATAAATGGATATAAG  
 GAGTTCACATCGTAATAGTCTAAATTTTAACCATAGGGCTTATAGACATCGGCATGTCTACATAATAACCAC  
 GCCGAATGAAGCGTTCCTTGGTTTCGAGTTGGTATATGGATGGGCCAACTCTTTGGGTCGTAATAGTGCATACG  
 AAAGATTGATAGAGCTAGCGATGACAACGTTATTGTATCAACGATGTCTATTTTGTACAGATTCCAATAAATC  
 TCTTGTGCCTTCAGCATAAGAGACGAATATCTTGTTCAGATAAGCCAACAATTGTTGACCTATCTCCGGAAG  
 ATACTCAAGTCGTAATTTCTCATAGGGAATGGTGCCTTTAGAACCAAATTTCCGGGCATAAATCCTGGGCCAAG  
 TTATTTAGCGCAGCGGGAAGGAGAAGGTAGGAATCCCTTATACGGAACAATAATTTCTTTTTTTCATTTCCAC  
 GATAGACTTTTAACTCGTACATTTTATGCTTCCTCATCACCGTTTGAAGGAGTACTTGCCGATCTGAGAAGTA  
 AAAGCTCTCGTTACTATAATGCCATCGTATCGTGAAAAGTTATGGAAATAGACCGTTCGAATTTCTTTTTTCATC  
 TGATACCACAGCCGCTAAACGCTCTATAAAGTCGAGCATCATACGTTCACTTCGTTTTTTGAAATCTGATATTG  
 AGAAATCGTTATCTTCACTGAAATATGTTTCAATATAATATTCAGACTTGGAAGCAAGATCTTCACCCGGCTT  
 AACCATAAGAACCCCACTGCGCAAGGAACATGAACATCGTCGTGGAGAGCAGCCTCTATATCGGCAACAA  
 TGAATGGGCTCCTTTTTATTTTCTTAATTGCTTTCAGTGCGAGTATATGATCGGGACGACGACTCTTCTTACCCA  
 TAGCTACCACTTCTACAGGTTTCATCACTCATTGTCCCGCCATCCGTTAATTCATCACAAAGTTGCTTAAAAATT  
 TCCTCTAGGCTAAAAGGGTGGACTTC

>TCONS\_00077202

AAAAGAGACCTTGATGTCTTCGCCCTAAGCGCATGCCAGGAACTCATTCTCTCATGATTTCCATGACACGA  
 ATCTTACTCTAGGGATCGAAATAAAAGGTAAAATACTCCTTACTCGTAATTAAACCCACTAATCATCATATCT  
 TTTTACCATGTTTCGATTTGCAGAAATGGGGATATTCGAATCCGGTCTTCTGACATATCTGCATCCCCATGTAT  
 AGTAAGAGTCTTTCCAACGAGGAACTTCACTATCGTATAGTTGAATCGACTCGCCTCTCCGGTCTCCCCAGGT  
 GCTCATGTTACTTAACAAAAAAGCATGAAAATGATGACGTAGGGTGGAAACCCTTCGTGACTGCAATCGTAC  
 GTTTTCGTCTTAAGAGAAACAACCTCTGAATCCGGTTTTGTCAATTAGGATAGGAGGGAAATCGGCAGCTCGAC  
 GGGGAGCTTGCCCGGCC

>TCONS\_00077206

CCCAATAAGCCTTTTTGTTTGCCTAATTATAGTATGGAATCAATTCAGGTCAGGCTTTTTAACTGAATAATTAC  
 CAAGGAGTTGATTGATCACCAATTTAAAATCTCCATAAGAGTTGCAACTCTTTCAAATCCACAGCCATCTCAA  
 GTCAAGTATGAGGGCTTGGTACTCTGCGAGATTATTGGAACAAGGTTTCGACAAGGTGAAGGAGTGCGGCAG  
 CACTTCTCCTTCAGAAGTAAGAAAG

>TCONS\_00077224

CGGGCAAGCTCCCCGTCGAGCTGCCGATTTCCCTCCTATCCTAATGACAAAACCGGATTCAGAGGTTGTTTCT  
 CTTAAGACGAAAACGTACGATTGCAGTCACGAAGGGTTTCCACCCTACGTCATCATTTTCATGCTTTTTTGTTA  
 AGTAACATGAGCACCTGGGGAGACCGGAGAGGCGAGTCGATTCAACTATACGATAGTGAAGTTCCTCGTTGG  
 AAAGACTCTTACTATACATGGGGATGCAGATATGTCAGAAGGACCGGATTCGAATATCCCCATTCTGCAAAT  
 CGAACATGGTAAAAAAGATATGATGATTAGTGGGTTTAATTACGAGTAAGGAGTATTTTACCTTTTATTTCTGA  
 TCCCTAGAGTAAGATTCGTGTCATGGAAATCATGAGAGGAATGAGTTTCCTGGCATGCGCTTAGGGCGAAGA  
 CATCAAGGTCTCTTTT

>TCONS\_00077228

CTTTCTTACTTCTGAAGGAGAAGTGCTGCCGCACTCCTTCACCTTGTGCGAAACCTTGTTCCAATAATCTCGCAG  
 AGTACCAAGCCCTCATACTTGACTTGAGATGGCTGTGGATTTGAAAGAGTTGCAACTCTTATGGAGATTTTAA  
 ATTGGTGATCAATCAACTCCTTGGTAATTATTCAGTTAAAAAGCCTGACCTGAATTGATTCCATACTATAATTA  
 CGCAAACAAAAAG

>TCONS\_00077348

CATGTTTCCCTTCGGAGTGACTTGGTATCCATTTTCTAATCCATCCCTTTTCAGATGATCTACACGTAGAAAAC  
CGCCATCTCCGGCAATGCTTTCCAATGCAGCATCGTACAAGGTTGGATCCTTTTTCTTTATTTGGGGATTTGTTT  
AAAATCTCTCAAAGTATCATCTTGTTAGTACTTTGCTTTCTCAAATATATAGCGGCACTCATTGGCGAGCCTT  
TTGCTTTTTTCGAGTAACTTGTGGAGGCCTTTAAACTCTTCGAGACCCCCCATTTACCATTAGCGGACATTGC  
TCCTATTCC

>TCONS\_00077355

TTCCATCTTTAACTAGAAAGAGAACAGACAAGAGCATTGAACTGCACTCTGGATATCCATTAGCACGATAT  
AGATACAATCTTCTGTACAGAATAAGCAGTTTGATCTTCATATATACAAGCTATTACTACAACCTATAAAAAGT  
TCTAAAGATCAAGAACATCAGTAGCCGGCCAGCTCTAACAAGGAGATGATCGGTTAAAAGGGTTCCTTCCAA  
AGGCGGATAGTGGGAAAATGCAATGTCGCTTTCTTCATTCTCTAGCTAGTCATTGAACACCATGCTATCTAC  
AATATAGGATCGACAAACTGATGAAAGAACAGCAACAGGGGCAACTTGTTGCAGGAACCTAGTGATGTAGT  
CTAGACTGTGTCATCAAGACAGCAGGATTATAATAAAAGGGAAACACAGTAACAGTTTCGCCAATACTCGCCC  
TTCATCTGCATGAGATAAAAATATTAGTTAGAATCAGCAGAAGGTTAGGCAGTAAGGTGCTTTGAGCGACAAC  
TGTAGGCCGATATCTTCATAATCAAATATTTTCCCTAGCAGGTTGCTTCCCTCAGCAAATGATGTGCCAGAA  
ATGGCTGTGCTGCATCATGTTCAAATGAATCAACTCCTACAAGTTAGTCAATTACAAATGGCAAGCTTCCC  
TGTCCATTCTCTGCTACCCCATATCAATACTGATCTCCCTAAGAGGGGGAATATTCTCCATTGCAAAGAGC  
ATCAGGTGGGGGAAAGATACAGTGTTGTGATCATAAAGCACGGGCTGCACCAACACGTTGGGGCTTGAAGTG  
TGACTCATATAGCATGCTACGTTCTCATTCTAGACACATCCATCGCGAAATCCAGAGGAGGAATGGAGGGG  
TATGCTGGCCGCACATAGTCAGGATATATTTGAGACAAATCTCCCCATTCTGCCACCTCTCAGGAAAGCGAC  
TTGGATAGACTAAACTATCACCATTCTCGTAAAGATTTGGGCTTGCTCTCGTGTGAGTACGACCCAGTAAA  
TTCACAGATGAAGGACCCAGCTTGGATCAAGTCCAATGACCTAACTCCCCAACAGTCTCTCTAGACCGAAA  
CACTTCAAATCTGTGCCTCAAACCCCTTTTGACTCACTCGATTCCGACAAGTTGGAGGACACTGACAATGTGGT  
CCACATTCAAAAATAATGGTTTACCTCTACCAATATCCCATTATAATCATAGGCAAATTGGCCACCGTTTC  
TCATAGCACAAAAACAATTATCCACACACCCATTAACGCACTCGCAGCCATTTCCACTGCCCACATTCTGGTA  
CACATACGGAGGAAAAACAGTCTTCAACAGATAATCAAATAAAGCAGGATCGTGATTATCATCGATATCGTT  
GAAAAGAAATACTGGCACGTTTTCTTTTTCTGGATATATCTAGACTAACATAACCCGCGAGGCCTTGCCACC  
AAAGGTCTAATCCTAAGATTCTGCGCAAACCTAAGAATGGCACTTCCCAACTCTTCTGATTCTCAATCCTAA  
CAAGCTTGTAATTATACACTCCAAATCCAGACTTTCCAACATCAAACCAACATTCAACAATTCTATACAATCC  
ATCATACACATAAACTTTACCACTAGCACTACCTTCGTAATTAAAGCCGCGAATTACCTTACCTCAATTCCA  
TAGTGCATACTCCGCTCCAACGCCAAATTCCCACATTCCAGCTTCTGATGCATACATTGCCTCGACAACTTAT  
CCTGTCCGCCGTGCCCAGTATATATAATCACATCTCCACCATCCTGATCATCCTCGTATCCACCCGAAACAAT  
CACACTCGTAGCAATCGGCTCCCTATTCGAGCTCTGACTCGCAGGGACATAATCAATGCCAGCTTGAACCTGC  
CCATGTAAACCAACAACGCAAAGCTCCATCCTGAAAAAGAACACATCACCAATAAACACCCCCGGGATCGC  
CCCAACAATACGCTTATCGCGATTATCCACAACCCGTGTTCTCTTAAACCTGACAAGCCTTTAAATCACCT  
CTAGTCTTCCTATGAGGCACCACACCCATGTTATTCTCATCGTCCGCCATCGCTAAAACACGCAACGAATCAT  
ACAGCATTCCGGGTTCTCCTAACAGCATCGCGGAAATAACGTTGATCTTCAGGTTTAAAGATCTGTAACCCTAAC  
TAATTCAGATGATCTTTGCTGATATTTTCTTCTAGGAATTACCATTCTGAAATCTGATTATCCTCATTATTAAC  
CGGAACAATGGCACGTGAATTATCGAGTTCCGCCTCGATGTCACGGGTATCATCATTCTCAGGATCAGCAAC  
AATCTCAATATCTCCGTAACGCTGCATTGTTTAGCAAAAGCTTCACGAAACAGCTCAGAAATTCTGTTATAC  
TCAGAATACACATTTGTTCCATCAGACCCAGATGGGTTTTGTTTCAGGTGTAGTAATTGAGCTGTGTGATAGTG  
GATTAGGAGTGAAATTGGAGTTGAAATTGGGAGTATTAGGGTTGGAGAAAAGAGGTGGGGTTTGAAGATCA



GCTTGAGTAAATTCATCAAGGGGTTCAAGTTTAGGTTCAATTTTGGGGTAATTAATGGAGTTTCGAGAATTAG  
AGGTTAAATTGGTGGATTCAGGTTGAAGATTAAGGTCTTGAAA

>TCONS\_00077610

CTGCTCTGCATTGCTGAGATACCAATGACTTCTCGGAATGATTCCAGATTCTCAATCAGTCACACCATTCAAC  
AAACAAGGCCTACCTAACAGGCAACAGCTTCTATTTAAAGAAAAAGAGATTAATGTCTACATCACATGCTAC  
ACGAGATTGCTATCAGCAGTAACGGGAAGATACAAACGAAACAAGCTTGTGTAGAGGAATAGCACATAACA  
ACTGAGCATCGGCACCAAATCTTCAATTTTGTCTGCTACCATTTGTTATGGCTTAAATTAAGGTCCACCTCAC  
CACCACACTGGACTCAGCATAATCTTCCCATTTCCTTCCAACAGAACAAGAATCTTCTATAGCAAAAGTTCAC  
TTATTTATAGTATTCTCTCTCCATTCTCTTCTTCACTATCTTTTGGCCCCCACCAGAATTTCAAAATCATCA  
AAACCTGCACCTAAGGCTTCAATATCATCAACTAGTGGACCTAAGGGAGCTATGCTGCCTGAAGGTGGGTCA  
ACTGTCATCCAGTCTGAATTTTCCATGTCCTCCGAGCTTAGTTCCCTTCTGGAAACCCAGTCATGAACAAGGTC  
CATTTTGTATAGGAGATGGAGTCCATACAGTCCGG

>TCONS\_00077647

CACAGCATCTCAATGAGGTTTCAGTATCACATGCCTGATTTACATGCTTCATTTCATAGTAGTAGCGCCACCAT  
AGCAGGAAAAAACTACAACTGGTAAGAGGCTCGTAGCATATAAAGCAGTTAGCAGGGCCTTCTGCACAA  
AAATCAAGAGGTTTGTGCATTTGCATCATAAGAAGTAATCAGGTGTTCTTCGGGTACATCTGGTTCCCCTCTC  
CTTGAGCTGGTTCAAACCTGAATGAATGTGCGCTCCCTGGAATCATCAACTTCCAAGATGGATGCCATATTGC  
CACAACGGTAACAATAATTAGGTGCACTAAAGATGGTAACCACCTTTTGATCATGGGCCCAATTGAATCCCT  
CCATAACCAGCTGGTGTGCTCTAGCAATTAGCTTCAAGTTGTTGGTGTGGTTAAACTGCTCAGAGATATCTTG  
GCCAAATGTATATCCAGCACCCCTAGGTGAGATACCCCAACCACAACGATCATCAGGATCAGACCATAAAA  
GATCACACATAGCACCTCATGTGGAACCTTCTTGTACACGGTCAAAATTGCGAATATTATCAAGAGTTTCAAT  
AGATGGAGACAAACCACCGTGTAGGCAAAAAATCTCTGACTCAACCAAGCAGTCAGAGGAAAGTAGTCAA  
ACAGATCTGTGAAAGTCTTCCACACATTGGCATTACCATACTTCCGTAGGCATTCATCATAAAACCCATAAAC  
CTGAGTAATCTGGCGACTCTCATGATTACCCCTTAGGATTGTAATTCGCTGGGGATAGCGCACTTTGAGAGCC  
ACCAAAAGCGTTACTGTTTCAACAGAATAGTATCCACGATCCACATAATCTCCCATGAATAAATAATTAGTGT  
CAGGACACTTTCCACCAATTCGAAAAAGCTCAGCAAGATCATGGAAGTACCATGAATATCACCACATATAG  
TCACAGGGCTTTTACAGGCTGCACGTTGCTCTCTTCCATTAGAATCTCCTTCGCTTTCTCACATAGTCCTTTA  
CCTCCTGTTTACAGACAAGGTTTGCACCTGCATAAGCTGAGCAATTTGTTTCGTCAGATTTCCATGAGATGCGCT  
CGATGGCACCGGATCCATAGCTGATTGATCTTCTTTTCTACTGCTTCTGGAGGGAAATTTGTGCAGAAACCCT  
AGCGGAAAAGGGGGATAAAATCAAAC

>TCONS\_00077653

GCTTGTAAGATAGATGCATAACCCACTTTTTGTTTTTAAGTGATTTAAATATTTGAAACTTTTTAGCTTATCAAT  
ATTTTTCTCTAGCTCTCTTCCCTGAGCAGGTACAGCACCATGTCCTTCACTTGAGTAGCAATGTAGCTGTTTG  
CCCCTCTGGAGTGTTTTTGAAGTATCTCTCAGCCATATGTGAGGATGATGTTTACAGGGGAAGAAGCTAATACAT  
GCAGCCATCAATCCGCTGTTTTGCGTTCGGTTTTCTGGAAGTTCTGAAAATGATAATTCTGTGGAGAACTATA  
GTGAAACTAGAGATGCAAAACCTGCTTTACTTTGGAGTGTCTTGTATACTCAAGAGCTTACTAAGGTATCTGG  
AATACCCCTTTTTACCTTTTTTGTGTTTTGGTTTGCTCTACACAGCTACCAGCTTCCATTTTGTTCATATGAATT  
TTCTTCAGTTCTTGTTCATTTTCGCTAAAGGAAATGTGCTATTCGTTTTGATAATGCTTTTTGTTTGTAAAAATAC  
TGAAATGGCTATCAAGCGCCTTTCGCATTTTAGGCCTTGTCTGTCAGTCAATTTGTTTCCTTCAGGGTTATGGA  
TTATTTTCGGCCTGGAATCTTCTGCA

>TCONS\_00077669

CTGGGTATATATGTACAGAGGCGAAATCAATCGTCGAAAGCATGGAGTTGCGGATGAAATCTGATCCAAGAT  
 CAGCAGCCCAAACTCTGGATTGCCAGTTGATTTTTTGGGACTTTTACGACCGTAGAATCCTTCTAGGCCTACT  
 GTAAGCAGATGTTTCCTATCTATTGATTTACAAATGTTGACATCTCTTCTATCCAATCTTGGAGTGTGTACC  
 AGAAGGATCGGTCATGCAGCGGGGCTCGTTTATTAACCTCCAAGCAAAGATAGTTGGATCGTCCCTGTACTC  
 AATCCCAGTGTATAAGTTTCTCCTTGTTAGCACCGTCTTGACATAATGTTTGAAATAACGACGAATGGTAGGG  
 TCATAGAAGAATGAATCATTGGAAGAACTTAAAGCAACACCTTCTTTCTCTGCCCATTTTACATACTGAGTCT  
 TCCCACCAAATGCATTGAGATTGTTAACCAAGCTAAGCATTAGCCTAATACCGTTCTTTCTCGCTTCTGCAATA  
 ACATGATCCAATGCTCTAAAACTCTTTCATCAAATCTACCAGGAGAAATCTGCAGGGCATTATATCCACCAT  
 CATTAAAAGCCCAAGTTCTACATACAGTGAGTCCCATCTTAGCACCGAGTTGTAATAATCCTCTAATTCTTGAT  
 CTTTTACTATAATCCACAGCATGATCCATTAACCAATAAGAATTCCAACCATTTATGTAAAAAACTTTACCAT  
 CAACAAAGAATTGAGTCCCATTCTCTCCACAAAACCTTAGCTCTATTTCTTTGTTGTAAGTGAACCACAATAA  
 ATCTCCAAATGAAAAATAAGAAAAAGTGACAAATAATGCTAAACCAATTACTGGATATAATAGGCC

>TCONS\_00077708

TTACTGAACATCAGATGTTTTGTATGTGCGGGTGATTTCGGATCTGTGCGAATGCATAAATTGCTCGGACGATTC  
 TAGCATAATCAGTTCCAAGCATCTGAATGACAACATCTGCTAGAAGTGTTCCCCACAGAATTGGACCAAGAA  
 ATGTCATCATGCTCCTTAGGCCAAAGTAACGGGAGGCAGCACCTGCTAAGCCCTTTTTTGCCGCCAGCATGGC  
 CAATCTGGACTCCAGGTTAAGAGCCGCCACTTCTCCACCCTTTTTAAGGACTTCCTTACTTATCTGATAGTTGG  
 CAGCCTCCAATAGCATCTTCCAGAAAATCTCCTGGCTAACCCGTTGTATATCCTCCCCAATGTTAGCACCCC  
 GCCACCCT

>TCONS\_00077721

CCATTATCCGCAAAAACGTTTCTGGCTATTTAGATAGGAAGTTATCCTAATAAAGGCTTTCTTGGAATCTCA  
 ATCTTCCATCAAAAAGGAAAAGTTTCTCTCAAATCAATTATTCTGCACTGTGGAGCCCTAAGCTTTCATCGCA  
 TTACGACGCTGTTTATCAAACCAGCTTTTGGTAGACATCAAGGCATTCACTAAATCTGACTCCAAGGAAGTCA  
 AGTGGCTATCAGGTTACGCGCATCCATAAAATAATCATCATAGCCTGTAACAAGAGACAATTGAATTGACA  
 AAAGATCACGAGCTAAATTTGATAGGGCAGGATATTTAGGACTTGCAGCTTTCACCAACTCAACTCATCAA  
 AGTTCTTAGTCCAAGGCACAATAGGTTCTTCTAGATAGCAGTCAATTTCTGACTTTGGTGGCTGACTAGTTGTT  
 TCGATGAATTTGCTAAACTCTTCTGAACAGTCAAATCCAAAACCTAGGATCATCAACAATTTCTGTTGGTTCAAG  
 AAGATATTCACCCGTATCAGAATCGTCATCGCTCATAGGATACTCCATTGTGGACCTGTGCACCACATAGTCA  
 TCGAGAAGGCTTCGGATTGCCTCCAAGATAGATGCGAGCGGTAAATGATCGTTATCTTCATACTTCAAGAAA  
 CAGAACTCTAAGTACTTCACTTTGTAGCGTGGATCCATAATAGTAGCTAGAGCCAACACCAAATATATATTCT  
 TCCAATACTTGTCAAACCTTTTTTACGATAATATTGGCTAAATTTCTGACAAATTCATCTGAACTCACAACTCT  
 TTCATCAGATTAAATCGAAGCTTATTGAGATTGTGGAAGTAGAGACCTGCAGTGGGACGTTTTGACATAAATA  
 GCACTTCTGCTGCAGTATAGACATGTCCTACAAGTTTACATACTCCCCTAACTTTCTCCCACTCTTGGGGCGAA  
 GGTATATCATAATCCTTATAATCATCTTTCAAGTATTCTCCTTTAGCCTCTAACTCCAAAGCTTCCTTTAATTTA  
 TGAAATGTCACATTCCAAACTGGTAGTGATTTGCCCCAAAATACTATGAGTCGAATGTCAGTATTAAATCCT  
 CTATCATCCGAAATGCTTTTTTACCATTGAACTAAAAATGTCTGCACAACAAGATACGCGAAACAATTGTCC  
 ATCTAATTGGAGTCTTTTCTTCTCAAGAAGTTTACTTTTAATGACCTCAATAATCTCATCAAAGTCCAGATAGC  
 TATGCACAGTGACAGCAGATACTTTATCTTCAATACCAAAATCCGAAAGACACTTAATTGTCTCGCCAATGTA  
 ATCGTCATACGCACCAAAAAGATCTAACGTTAATAACCCAACCTCCTTAGCTTCCAGTCTTCATCAATGAAATGA  
 ACTCTTAAACAAATGAAGTCAAAACAATTTTCTCCTCAAAATCCGAGGAATGCCAGTAGCCAAAGTCATGGAAC  
 TTGTTATACGTTAACCTCTCAACTGAGAGGCTAACCCGTCCATTCAAGCTTCTCAAATTTTCTTTAACTCTCGCT  
 TTCTCTCCTCATACAATTTCAAGCAATACCGTGAGAGAATGGCAGATGAAAACAAACGAGTTTGTGGATTA

>TCONS 00078124

TTTCACAGCACTCTCAGTCCCCTAGCGAAGCTGGAGAATTCCATGTCTTCCTCACCGCAATAAAAAACCCAAT  
TTTAACAATTGTTTCCTGCATCAGTCGAACTTCATCTCCTTCAGATCCCATTCTCAATGGCCGCCTCTTCTTGCT  
TCTTTACCTCTCTTTCTGATTCTTTAGGAACTTCCCTAATCACCTTCTCCTGCTCTACTGCTTCCTTAACCTATAA  
CCTCATTTTCTTTTGCTGCTTCTAAAATTAATGGCACAGATATCGACCCATTTTCTGTAATCACATTAACGTTCT  
TTCCCAGCTCCCCCTCCTTCAGCAGCT

>TCONS\_00078157

CCAAATATCTGACACCATATGCATCCTGATTTCTCTTTGACCATCAAGGTTACCCGGTCCACTGCTGCCTCCAC  
TTGCATAGGAATTATCCTCAGCAGCCTGCCAAACGGACTGCCACGCCTGCGACGGCGGTGGCTGAACGTACA  
TTGAAGGATCAACCCAGGCATAGCAGGCCTGCCCATCATCACACCCGGTGGAGCAGGCTGGCCCATTTGGTG  
GGTAATAGTAAGGCACACCACTAGCTGTGGAGCCCACAATCCCAGCAGGCCCAAGACCAACACCACCCTCT  
TCCTTGATCTCATCCCTCGGAACAATGTCAACAAGGAAATCAAAAATGTCAGTCCGCGTAATCGCGGCAGCG  
ATGTCGTTCTTCTGTAAAGTTCGACGCTTGTTTTCTCAGCGTGAAGCCAGGAACGAATAGTGAGTTCCAGAA  
TGAAAAGCTCACACGCTTTGGCGAATAAAATGGGAGCTTCAGCGGAGATCATGCGGACATCCTCGTCAGCTT  
TCATGATCTTCTTGATTTCGGGCTAGAGGAAGTTGGTGGTTCTTGAAATCGTTAACCTGTTTCGATTTCTTGGCGC  
TGGTAGGTCCAGAACATCTGGAGCTGCTGCTGTTGCTGCTGAAGGAGGTGGTGGTACGGTGGCTGCGCTGGAT  
ACGCCGCTGCTGCTGCCGCCGCCGCTGCTGCATTCGCCGCCGATTGCTGGTTGTTTTCCATTGGCGTTTTAGAC  
GAGGTGGTTCACCGGCG

>TCONS\_00078170

GAATCCTCAAATATGCGAACTGAATCCTCAATTCCTTATCCAAACTGCGCAATTTAGAACAGCCAATAAGCA  
CTGATGACATTGTGAACTCATCCGCTGAATATATACAAGCTCTCATCAAACAAAAATAAGACAGAGCTGTAT  
CTTCATGCCCTGATTTACAGCAGACTGAAATCAACGAATTCCATGAAACAACATCCACCTCCTCCATGGACA  
AAAAGACACCAGTACCATAGTCCACTAGCCCAAGGTTTCCATACATATCAATCAGTGAATTCCTACCACCA  
CATTAGACAAATCAACACCACTCCTTAGCATGTTTCCATGTATTTCTTGCCATGAAAAGCAAACCTGCACACT  
CGAAATCAGAATCGAGAAAGTATATCCACTAGGCCTAATACCATAGTTTTGCATTTCCAAGAAACCACCAAA  
AGCAACCTCAAACA

>TCONS\_00078180

AAATTTCAAGAACTATTTGAAATGAAAAGAACTCTAAATTTTTGTACATCACTTAATCAGTAACATCTAAA  
ATTTGCATTGTTCAATTTACCATATAAGCTAATTCCATGCTGAAGCAAAGGTAGTTGAAAAGCTACTCCTCATC  
CACCACAACACTGATCTCACCTTTCTCAAGCATATCGTAGAATTCCTTAGTTCTCCTCTGGTTGTTCCAATGGT  
GCATCTTCCAGAAACCTCCCGCAACCATGCCAAGAGTAATTCCAATCAGTATCTCCTTAACCTACACTTGGACC  
CTTGTACACAGCATGTGCAACATGGGAACCTGCCATCTTTTCTCTTCTCAGAAAGCAAGTCGGTGAGACGGT  
GACGCGAGAGAAGCAAAAGGAC

>TCONS\_00078232

GGGGTTGCTCTGATGGTAAGCAACCTTCACTTCCAACCAAGAGGTTGTGAGTTCGAGTCTCCCCAAGAGAAA  
GGTGGGACGTTCTTGAGAGGAAGGATGCCGAGGGTCTATTTGGAAACAGCCTCTCTACCTAGGGTAGGGGT  
AAGGTCTGCGTACACACTACCCTCCCCAGACCCCACTAAGTGGGATTATACTGGGTGTTGTTGTTGTTGTTGT  
TGGT

>TCONS\_00078233

GGGGTTGCTCTGATGGTAAGCAACCTTCACTTCCAACCAAGAGGTTGTGAGTTCGAGTCTCCCCAAGAGAAA  
GGTGGGACGTTCTTGAGAGGAAGGATGCCGAGGGTCTATTTGGAAACAGCCTCTCTACCTAGGGTAGGGGT  
AAGGTCTGCGTACACACTACCCTCCCCAGACCCCACTAAGTGGGATTATACTGGGTGTTGTTGTTGTTGTTGT  
TGGT

>TCONS\_00078234

CAACAACAACAACAACAACAACCCAGTATAATCCCACTTAGTGGGGTCTGGGGAGGGTAGTGTGTACGCAG  
ACCTTACCCCTACCCTAGGGTAGAGAGGCTGTTTCCAAATAGACCCTCGGCATCCTTCCCTCCAAGAACGTCC  
CACCTTTCTCTTGGGGAGACTCGAACTCACAACCTCTTGGTTGGAAGTGAAGGTTGCTTACC

>TCONS\_00078235

CAACAACAACAACAACAACAACCCAGTATAATCCCACTTAGTGGGGTCTGGGGAGGGTAGTGTGTACGCAG  
ACCTTACCCCTACCCTAGGGTAGAGAGGCTGTTTCCAAATAGACCCTCGGCATCCTTCCCTCCAAGAACGTCC  
CACCTTTCTCTTGGGGAGACTCGAACTCACAACCTCTTGGTTGGAAGTGAAGGTTGCTTACC

>TCONS\_00078323

CACGAATGTAAGCCATTGATCTCAGCATTGATCCTAGAGTATCCGTTGAAACTTGAAATTTCACTTCAGTTTCT  
CCGGAAGGTGTCTTAGTATCTTGAAGCTTTAAATTGATAACAGCTACTCTATTTGCCGGCAGTGAAAGCTGTT  
GACTTATGTAACCCATGGATTTGAGCATTGGCTCCAGAGTGACTCTTGTAAGTCTAAACTGAACTTCTG

>TCONS\_00078334

ACAACAATTTTCTTGCAAATGATACGGCTGCTGGAAACAAGGATCTCTGCCTACTCTAAGGGCTTCAAATGGT  
GCTCGAACAAGATGCCATTTCAATAGCTGTCAATGCTGCTTCGGCACCTTTATTCCCAGACTTTCCACCAGC  
ACGATTGAAAGCCTGTTCCAAGGTATCACATGTCAGAACACCAAATATGCAAGGAGTACCTG

>TCONS\_00078335

TGACAGAGTAACTCTTGAAGGTGTCCAAAGCACCTCCAAAAGCTTCTTCGTGATCAGATCGTTAAAACGTG  
CCACCACAATAGCAAAGCGATGTCCCTGTGCAGATAGAAGAGAACCCCTCAACTCTCGAACAGCTGATGTCT  
GAACTAAATCAGTACGTTTTTGTTCCTTGCTTGCAAATCCAAAACCTTGGGATTGAGTGAAAGAGAGAGCAG  
CAGTTAATTTAGGTGAAGAAGAAATGTTTGTGTTATGGAAGATAAGGAGAGGAAGAGACGATGTGAGGGA  
TTGAAAGTTGATTGACGAAGTGGAACAAGACCGATTTCTCCAATGCCG

>TCONS\_00078393

CTTGGTCCGAGAGTTGATACAACCTTTGGGTTGCTGAAGAATATGCAGTAGGTAATGAATTAAAGAGCGCAGA  
GGATGAAGCAAAGGGCTACGTGATGGAGTTAATAGATAATAACCTTGTAATGGTTGTCCAAAGGAGCTTCTT  
CCGTGAGGTGAAAGCAATTCGCATGCATGATCTATTACGTCAGATGATTCAAGTTCTAGTGACCAACAATGTT  
ACTTTCAAATGCAT

>TCONS\_00078489

ACTACTCAGCTGATAGATCAGGTGAGCCAGCCATGATCACTAAACTCACCAAACCAGCAGCATATGAAAATT  
TGAATCATAGGTTTCTATATGCTTAAGGAAAATGGGATTTGCAGATTAGGATACGAAAGTTTATTTATATACA  
ATGGAAAGCCCCTATAATCCATGGACGACCAGTGGAGTTCATAAAAGAAACCAAAGAAAGGTCCGCGACAA  
AGCTGTCCCCTCTCTCCATATCTCTACTTACTGGCTGGGTGCAGATAAACTGTAATAATAACAAAGCCAGAT  
AGAGATACTGTTGTTTCTCAGAATTGATTCAGATGGCGAGGACCCACGGAAAAATCCACCTTATTCATGCTCCG  
CACAGCAACTTGCCCGGTCAATATTATATGTCTATGCTAACTTGGTGATCTATTTTCGTTGCC

>TCONS\_00078632

TTCTATCAACTTTTGTCCCAAAGGATATCTATCAAATGTACCTAAATATACCAGTTCTAACTACATTGGAGAA  
GATGAGACCAAGGATCCTGCATTCCCTTCAAGTTCTCCAGTTACCAATCCTGTGAGTAGCAGAGGGTCCGATT  
CATCGATATTATTCACCTTCCCGCATGTCTTCTTATTGTGGCCAGACCTTACACTTGCTACACTGCATCTGA  
CGTTTGACTATGTCAAAAGTGTCCACCTTTTTCATCTTTGGTTCGGCCAGGTGGACGTTTTGTTGGTGGAGGAGT  
AACAACAATGGCCACATGGTCCATATCGGGTTCACCTTTTATTGGTTTTTCGAGATTAGGTATGGGGTTAATTG  
ATTCGGCATATGTTACATGGTAAGTCTCAGTTGAGAAGTATCTGGAGCAATGATCATAGGGGCTCCTCCCTAG  
GCATTCAAAAACAGCAATAGCATGGCAACATGGCAACCCGTTAAGCTGCCACTCTCTGCAACTACAATCCCA

CTGATCAACATCAACTACTTCAGCAGATTACCGCGCACTTCAAATGTGCTCCCGTGTGAGGGTAACACTTGA  
 AGCAACCTTGCTCGTGACGTTTCACTTTGAAGTTTTTGTTCATCACAGGGGTCAATGGCATAACCCACTGACT  
 GGAACCAACACGCCTAGTATAGATCAATTCCATTATTTTACCTCGTAATGCATCAACCATTGAGTTATTGGC  
 AGCTCGTTCACCTCCGCTACCCAATCATAAAAAAGCTGGCTGATGTTGGATGTCAAGTGGCCATACCTTGCCC  
 CTCCAAAAAATGCATTTGCCCAGTGTTCAAGGCTCACTTCTATTGACCCAATTGTAACTTCGGGTGAGATAGC  
 TTTCAAATTCTCAACACACCGGTGCGAAAGACTCACGCTTTGAGGCACAAGCGGCAGCGTATAAATCTTGAT  
 CATAAGGCGCCTGGCTTCATGTGAAAAGTGCCTTTTAAATCATTATTAAGTTTTTCAGCAAGATAACGCAGA  
 CAAAAGCCATGGTAATACTGCTCACCAAACACATTTTGCAATGATTCTCTTATACCTCTTTGGGAATCAGAAA  
 CAAAAGTTATTGGACAGGATGTTGGGACAACAGATTTAAGCTCTGAAAGAAACCAATGCCAGTTGTCGCCAG  
 TCTCTTCATCTATAACTGCGAAGGCCACTGGAAAAACGCCATCATTTCCATCTACACCTACGGCCGCCAAAAG  
 TGTTCCTTGATACTTTGCATAGAGAAGAATGCTGTCCAGGAAAAGAAGAGGGCGGCAACCTTGTTGAAAACC  
 AGATATTGAGGCATGAAAGGCAATAAACAGACGATGGAAACTCGAGTCCTCCTTAGTAGCAATTGTAGCAA  
 CACTACCAGGATTAGTTTCTCTAATTTTCTCACAGAATAAGGGTAATTGACTGTATGCCTCTTTGAAAGAACCC  
 TGAAGCTGCTCCCTTGCTTCTCTTTGCACGCCTTGCTGAGAATAGTTCAATTGAATGCCATATTCACGCTC  
 AATATCTTTTGCTATATCCTTGCGCTTGAGTTCGGAGCGACCTTCAACTTTTCTTTATTATACTACCCATCCA  
 TCCTCTCGTTGATCGGTACCCAGCTTTAACAGCAGCTCCATCACATGTATGCTTCGCATTCATTTTCTTAATGC  
 ATATTAGCTGAGTCGTAGGCAACCTTGACGCATATATGCACCAAGAACAACCTTCAGCCTTGCAATTTAGCGGT  
 TACCCTGCGACTATCATTTTTCTTATACCTATAAGTAAATCCATGGGCAATTGAGTATTTATGCAGAGCTTCAC  
 GAAATTCAGCAAACTATTGAACCTTTGACCCGCACCAGTTATTGTGTTCTCCCATTGCGAAGCTGCTCTGCG  
 ATGCTTCTCCATGTTCTCCTCATTGTTGCCGGGATAGGAACACAGGGGAGTTGTGTCAATGGAAGCATTAGCA  
 CCAAGCAGATCATCACAATGGATCATATCCACAGGGGTGGGAGGAGTAAGCGCTGCCTCTGACGCAGTTGTC  
 GACCTACTGGCAGAGACATTGGGCACATTTCTCACAACAGCTTCATCATAAATTACAAAAATCTCAACTTGAT  
 CAGCATCCTTGAAGAAATTAATCATACGTTTGAGGTCTTATCTTTAGATATAGTAATGAGAGTCTTCTTATTC  
 CCAGGAAGAAAATATTTTATTGTCATTCTTTCAGTAGCAAACTGAAAGTTCTCTGCTACTTCTTTCTTAAAGTC  
 AGCCAAAAGTGTCTGGTCATCAATGTCCAAAGCATAAGCCTCTCCACCTGTATACGTCAAAGTTCCATCCTCA  
 TTGTTTGTACAAACTCTCCTCCAGATTGACATATTGCAATTATTTTCTTAGAAGCCATCACTAGGCCAGCACA  
 AAATCCTCAACCAATTCAAAAACCTTTCTGATGATGTAGGAAGA

>TCONS\_00078640

CCTCCATTATCACTTCGGAGACGCTTTAGCTTTGACCCGTCTCCCTTTCTACTAGAGCATGAACTTCTGGAA  
 AACTTGAAACACCTTTGGCATAAGAAATGAGTGATTCTTGGAAGAATCTGCAATCCCTTCTCGCTCATATG  
 ACCCATTCTTTTGTGCCACAAATCTGCAGAAATCTCATCTTGTGCCGCGTTCAATTTACCTTGGCATATTTCTGC  
 ATTTGTCATGTACAACGTGCCACGAG

>TCONS\_00078745

TAAAATGCAAGTAAAACTAGAACTCCATGAAAGCTCTGTGATTATCTAGGCTGGAACAAAGGTGATACTC  
 TCCGTCAGAACAACATCCTGCATCTGCTCCACTGTCAGCACTGAAGCTTCAGTGTCAAAGTTGGCCTTCTCCA  
 ACTGCTGGTGAATCTTCTCAAGTATTGCAGATTGATCATCCATGTGAAAGTTGCGCATGTACTTCAGCATCTCC  
 AGTTGCTGCTCTTGTAATTTTGTGTCATCTTAATCTTTAGCAAACCCGTCCGGACCAAGCTCGGCCTCTTC  
 ACAAGCCATTTCTTCTTTTGAACAAATTCATAAAAAACGAATCATCAGGTCTTGATCACTCTCATAGGTGATGT  
 TTATTTTCCCCAAGCAAGCAAGACCAATTCTTGATCAATTCCCATCTCGGAAAGTATCTCCTCTTGATGGC  
 AGTGGTAACAGCAACAGCCTCCTGCTTGTGCTGACAGCATCAGCAATCCTTTTCTTGACATCAGGTTGGGAG  
 GTGAGGAACGCGAAGCGATCAAAAAGATGAAGCAATTGCTCCTTCGATAGCATTTCTGAGGCTGCCATTTTC

GTCCGCCGATTGCTAGAAAACAGCAGACTAAAATTGGAATGTATAACTAAGTGCAGTGACTATTTCCAGGGC  
GACGACGACGTTTCGTTTGCTTGATATTAGCCTTTTGCCTCTTCCCGTGTGTGGCCAAGG

>TCONS\_00078797

CAAGAGTTGCAGTTCACACACGCCCCGGTGTGTAAGTGAAGTGTGGCTTGGAACAACCTTGTAGCACTCCAGG  
TTGCTTTGAGAGCTCAGAAACCTGCTCAGCAGTCAGCTTTGCTGAGAATCCACTAGCTGCATGCTTGTAAGTG  
TATATCAACGCCTCTTTTGCAGCCTCCTCACTGCCAAGAACAGAAAGTTAGGGTTTTGATATGATAGTCCCTCGG  
CTTCTAGATCTTCAGGTTTCTCAGTGTATACTATATGAAGTTTGGCTTCAATGGAGGGTGTGAATCTGCCATT  
GTTACGATAGCTGCAATCAACAAGAAAAGCAAAAGAATTGAAGAAAGTATTTGATCTTTCTGCAT

>TCONS\_00079069

AAAAACCTTGTACAAATTCCATAACCTAGGCACTCTCAATACGAATGATCTTCAATAAATCCATTGGTTTTTT  
AGAAGTTAATTAAGGAACATCAGCTGCATGAACAAGATATGTCACTGCCAAAGCCAACAACATTAATAC  
ACATGCAATCCCCTGGTCAATTGTTGTACCGTCGCTGGTCGGAGCCGGTGTCTGGAGCAAAACCTTCTTGTCCT  
TGAACAGCAGGCAAAATGATCGAGAGAACAAATACTAAAACGAAACCAACATCAATTTA

>TCONS\_00079154

AGTGCAGGTACTCACAGCCTTCTCGCGAGCCCCGGTTCGATATGGACTCCACGTCGTGATTGCATCAAAGTT  
TCATCAGCTTTCTGAGGATTGAGTCTAAGCTTAGACAAGACTGTTTTGTTGAGCAAAAACGCCATTCTTTCAC  
GAATCAAGACAGAGGCAGAGAGCAAAACGCAGAAGAAGAAAATGATGATTCGAGTCTCCGGAGACAGAACC  
AAACAGAAAATTGCTAGTGTATATTTTTGTGAAATGGGGTTTTGGAGGAGATGTGATTACAGAGAACTCCC  
TAATAACCTAAGAGGGTCACTAACCCCCCTAATGTTTCAATTTGTACAGACAAATCCTGAATAAGATATAATG  
AAACGTA

>TCONS\_00079157

ATTAGGGAGTTCTCTGTAAATCACATCTCCTCCAAAACCCCATTTACAAAAAATATACACTAGCAATTTTCT  
GTTTGTTCTGTCTCCGGAGACTCGAATCATCATTTTCTTCTTCTGCGTTTGCTCTCTGCCTCTGTCTTGATTCTG  
GAAAGAATGGCGTTTTTGTCTCAACAAAACAGTCTTGCTAAGCTTAGACTCAATCCTCAGAAAGCTGATGAA  
ACTTTGATGCAATCACGACGTGGAGTCCATATCGAACCCGGGGCTCGCGAGAAGGCTGTGAGTACCTGCACT  
TTCCCCTCTTTTTGTTTCTCGAATTGCT

>TCONS\_00079253

CTATTTACGACGAGCAGCTACAAAAGCTCTTGACCCCATGAAATGATTAGATTTACGCTTTGTTTCGATTGAC  
CTTGTTTATCTCGAATCGTCTCTTATGCTCTGGATTGCGCCACATGTCACAAAGCCTGTTCCAATTTCCGGGGT  
CAACTCTGGCACTTCAATTTTACGAGCCTCTTCCTTGAGCTTGCACTTTCAAATAGCTTTTTTAATTTGTAGCG  
CCATTGTCGGCTTCTATTTTTCAGAATATCCTCACAGCTATCTTTGGTGTAAATGCTCGTCCAAGTTTATTTCAA  
CTTCT

>TCONS\_00079301

CAGTACAAAATGGTGAACATGAGCATAAGCTGATAATAGAAGTTGCAACAGAAGAAATATACTAATACTAG  
AGTTATAACTAGCTATAACTATGTATGAACACTTGATTAGCTATATGAATTTTCCAGTAGCTTTCACTTGCTA  
GATCAGCATTGGAGCAAAAGAACTATGTAGCACTCTAAGAGCTAGCTTGCTGCTCAGCATCATC

>TCONS\_00079350

AATAGATTGTAATGGCCTTAAAATATCGTGGAGAGCAAGTACTAGGTGGTATCTATACTGGGATTAATACAA  
AGCAGATATTCATGACGAGTAAAATGGTAGAAGAGTACAGTGGGCTTAAGCTGCAGCCACATAAGGCCATT  
GTTGGAGCTAATGCATTTTCTCATGAGAGTGGCATCCATCAGGTTTTGTGTTATTCTTCTCTAA

>TCONS\_00079414

AAGAAGATCTTGAATAGAGAGTTTTACCCGGGGACATGGTTCTTCTATACAACCTCCAGACTAAAGTTGTTTCGCGGGCAAACCTAAGTCCAAATGATCCAGATCATTCAAGGTGGTGAATGTCTACCCCTTTGGTTCTATAGAATTAGGAGTTGATGACGGGAGTAGAACATTTAAAGTCAATGCCAAAGAGTCATGCATTATTTGAGCCACGTGGATGAAGGAAGATTGGTATTGGAGATTGAGTTGGGGGACCACAATTGGTACCTGAAAGGTGTGTTACGTCGTTCCACGAAGTTAAATATGACGCTTTTGTCTGTTTGTCTGTTGAGACTGTGCCGTAAGAATAGAGTGCATAGATTCCAGGAAAGTTTCTGCATTGCGATATTCAGGGGAATACATCCTCCCGGTGCATCATTGTTGGTGAATAGGGGGTAGGGTAAAGAGGAAGGGGATCCCTGAGTTGGTAAAGGGAAAACGAATGGTAGTTCAATTGCTTTTGAATTCCATAACACCTACTAGTCTATCCCCTTTTAAGCTCGGAAAACAAAGACCAAATACTTAAGTTTGTATTATCAAGTATTAGGAATTTACTTCACTACCTTTTCTCATTGGATGATCAAAGAGAAAAGGAAGAAATCCACTTAAAGAGGAACCTTGAGTGTCAATCAAGAATTATTTAGATTTCGTCGAGTCAGGACTTAGCTCGATGCCTTTTAATCTTGAAGCCTTCCATATGAAAACACCAATCAGAGTGTCCCACTTTCATCACTGTTCAAGT

>TCONS\_00079450

GACTCCTTGTCTACCTGACATCATTTTTAAATGGTGTCTGTCGTCAAAGGCGAAGTCCAAAGCATCAATGTGGGCAATGTGGGCTTTATCCGCAAAGCGAAATTAAAGTGCAAGCTTTAGTGGAGAAACCACCTGCCAAACACGGCGAAGACGCTTCTTGGCGTTAGCTTTACGAGTAGAAGTGAGCTTAATTCTCTTCCACAGAAGGCCGCGGAATCGTG

>TCONS\_00079752

TAGCTTCACATCATTCACCTTCATCATGTCCTTGATGATAACATCTTGAAGACCTCAAAAATTCTTCATGCTAGTATGCACTTCTAACTTCTCATTCCCTGTATGCACTATAAACATCTTCAATCTCCATCTCGGATTCATCTTCCAGAGATCTCCCTCCAACTACCCATATTATGCTCGTTATTTCCACTTGAACACGTTTCATCTTCTGACTCATTCTCAGCAAATCATCATCCACGAATTCCTGCAAATCTTCAATAGTATCCATTGTTTCCTTCTTCTTCTGTATCCAACAAAGCTTAGAACCTGTTCTCTCCAAACAGTCAAAGGGTGCTTCTCAATCAACTCAGAACCTTCATAAGCACTATTAGAAATACATGAAACCTCTTACCCCTTTCTGAAACATAAAAGATACCAAATGTTTAAGCAACAGCCTCATCAGCTTCTGAGGCATTACGAACTCCATCCTAAAATGTGTGTCAGATAATCTGTCACCAACCTCTTTTCGATTGTAAAGCTCAGCAGCTCATGCATCACTGCAACCGCCCTCTTATTGAACTCCAGTGTTCCAGCCTTTAGTTCCCTGCGATCTGCATAAAGGCGACAAGTATTCCCGCTTCTGAAAATTCTCTATCTTCCCCTTATATCTAGACAAAATTTGTTTATAATCAGGTGGGAATTTTCAATTGGGAAAGACAAGGAAAGAAGACCAGCTACGTGATCATCTGGGACCTGCATACCACCCAGAGCCTTCTTTCTAACTCTGTATAGCCCAACTCGATCTCCAATTCACAAGCTCTAAATACTCACTTTCATCATAAGGTTTAAATGGATAAACAACTCTAAAGTAATCAGGAAATCTGTGCACCCAATGGTTCCTAAAATCCACTGGCAACCCCAAATCTCTTCTGAAATGAACAATCTTATCTAAGGCAAGGCGCTTGTCCACGGAATCATCATCAGCATCCTAGTTACAAGCTCTGCAGCTTTATCACTCTGCTGTTCAATAATAGCCTCCTCTTCTTGGACTAAATCTTCAGCCTCCTTGGTCATACCACACCATAAAATCCCTCTATGATCCTTGTACAGTTCAAAGAGCTTGGGGACTTCCGCAGAAAAGCAGAGATTTTATGGGGCTTTGGGAGGTTTATTTGCCTCCTATACTGATCAAGTCCCTAATTGATATAATTTTTTGAGGTTTCTGTTGAGGACTTCAAATATTAATAGGACTTTGGAGAGGATCTTGTGCTTTTCTGTGGCTATTTCAAGGTCATGCACCTCTTCTTCTTGTCTTGGACTCTTTTACTGGTGGTCAATTGATCGGTGCCATTGCAAGATTGATGAAGAATCTATGAACAAGAATGCAATTGATGCATTTAGTTCAGCAGAAAAACATCCACGTCTACCAATAAGGTTGAGCATTGTGCCAAACCAAAATAATCAG

>TCONS\_00079804

TTACAAATTAAGAGAGAAAAGAAAATCTAAGGCTGCTTATGCCTCTGGGTATAGATATAATCAAGGTGAGCCTTAGTGTTCTTCTCATCAAACATTCTTCTTCCCCTAGACCTTCACATTTATCGTCCACTTCTACTTTCACTGCTGCCTTATCCTTACTATGCTCCATTGGAGTAACGTGCTGATAAGGCGTACTCATCGGCCGGGAAGAAGCGCAAG

>TCONS\_00079845



TATTGGTATAAACGACCCTTCCCTCGCGTTTCGGCTATAGCAAGAGCCCCGAATCTAGAGCTGCTTGTCGTTCAACCCAGTTCCAACAATGCATTTCTCGGAGCGAGAAAGAGGAAGCTTGACGTTGCATATTAGAACTCAT TAAAGCTCGATTTCGCATCATTATGTTTCGATAAAAGGAATGAGGGAAGCTCCAATAGAAAAATATTGAAAAG GAAAAATACTTCGAAGATGAACCTGTTCTTCTCTGAATATCCCGATTTAAGGCTAAAGAATTTCTGCGCTAC CATATAGTATTCATCTCTACCTGGTGATAAATAAAGCATCCGTACCCCGGTTGACCTCTCAGAAATTTCATAA AAAG

>TCONS\_00079863

GCCGCTTTTTACTAATATAGTCCCGAGTTGGTAATTAGAGTTAGAAGCTTCACAGCTTCCTCCACTCACCTCCA CGGGCGAATATAGTCTACTAGACTCTTTCTTGGCTAGTCTAGTAGACTATATTCTAGGTCATTCGGAAGGGCTC CGTATAGTTTTGGGGTGTAACGTTGTGGTTGTTCCCTCTCCTTTCAGTCGAGTGACTTCGTACCTATCCTTACCG AGAAAAACGAGTTCCAGAGGCATCTTCATTCATATCGATTTGGGTTTTTCCGCACCATATTTTGATCTGCCTC TTCTTCGATCCGGAATTTCCAGCAAATCCTTGACTCCTCGAATACAATGGAATCTCACACCTGGCGAATCTTT CACTCTACCTCC

>TCONS\_00079864

GCCGCTTTTTACTAATATAGTCCCGAGTTGGTAATTAGAGTTAGAAGCTTCACAGCTTCCTCCACTCACCTCCA CGGGCGAATATAGTCTACTAGACTCTTTCTTGGCTAGTCTAGTAGACTATATTCTAGGTCATTCGGAAGGGCTC CGTATAGTTTTGGGGTGTAACGTTGTGGTTGTTCCCTCTCCTTTCAGTCGAGTGACTTCGTACCTATCCTTACCG AGAAAAACGAGTTCCAGAGGCATCTTCATTCATATCGATTTGGGTTTTTCCGCACCATATTTTGATCTGCCTC TTCTTCGATCCGGAATTTCCAGCAAATCCTTGACTCCTCGAATACAATGGAATCTCACACCTGGCGAATCTTT CACTCTACCTCC

>TCONS\_00079865

GCCGCTTTTTACTAATATAGTCCCGAGTTGGTAATTAGAGTTAGAAGCTTCACAGCTTCCTCCACTCACCTCCA CGGGCGAATATAGTCTACTAGACTCTTTCTTGGCTAGTCTAGTAGACTATATTCTAGGTCATTCGGAAGGGCTC CGTATAGTTTTTGGGGTGTAACGTTGTGGTTGTTCCCTCTCCTTTCAGTCGAGTGACTTCGTACCTATCCTTACCG AGAAAAACGAGTTCCAGAGGCATCTTCATTCATATCGATTTGGGTTTTTCCGCACCATATTTTGATCTGCCTC TTCTTCGATCCGGAATTTCCAGCAAATCCTTGACTCCTCGAATACAATGGAATCTCACACCTGGCGAATCTTT CACTCTACCTCC

>TCONS\_00079866

GCCGCTTTTTACTAATATAGTCCCGAGTTGGTAATTAGAGTTAGAAGCTTCACAGCTTCCTCCACTCACCTCCA CGGGCGAATATAGTCTACTAGACTCTTTCTTGGCTAGTCTAGTAGACTATATTCTAGGTCATTCGGAAGGGCTC CGTATAGTTTTTGGGGTGTAACGTTGTGGTTGTTCCCTCTCCTTTCAGTCGAGTGACTTCGTACCTATCCTTACCG AGAAAAACGAGTTCCAGAGGCATCTTCATTCATATCGATTTGGGTTTTTCCGCACCATATTTTGATCTGCCTC TTCTTCGATCCGGAATTTCCAGCAAATCCTTGACTCCTCGAATACAATGGAATTTACACCTGGCGAATCTTTC ACTCTACCTCC

>TCONS\_00079910

AAGTTCAGTTTCTGAAAGATCTAATACCGCCAAGAACTACAAGTCAGCAGCAATAGAAATTTACATCTACT TAATCTTCTTTTTAGGCCTCAACTGGTTGCTGTGTCCACACTTCTTCTTGCAGGAGTTGACAGCACGAGGATGC AATCGAGCATAGCACTTGCAGCATATCATCTTGTCTGATTGTATTTCTAGCCAAAGCCATCAACGATGGCT CAATGATTCCACCACGAAGCCTCAACACCAAATGTAGAGTCGATTCTTTTTGGATGTTGTAATCGGCCAAGGT GCGGCCATCTTCGAGCTGCTTACCAGCAAAAATCAGCCTTTGTGTTGGTCCGGTGGAATTCCTTCTTGTCTTGTA TTTTGGCTTTAACATTGTGCGATTGTATCACTGGATTCAACTTCGAGAGTTATGGTTTTACCAGTGAGAGTTTTCA CGAATATCTGCATTTTCGTTACGAGCTTCGCCTTCCTTCTTCTTTCAGCTCCTCGCG

>TCONS\_00080082

ATATGTTGTGATACTTGATGTGGGTTGTGTTCCCTTATTTGTTGATGATGGTGAGGCTAGTGAGGTACATGATT  
GAGTGAGGCCAAGGGCCTGGTTGTGAGGATATTAATACCATAGCGCGTGAGTTGTCCGCGTAGCACGTGAGT  
TGACCGTGCGGGTCCAGGTATTGATACCATAGCGCGTGAGTTGTCCGCGTTGCCCGTGAGTTGAC

>TCONS\_00080083

ATATGTTGTGATACTTGATGTGGGTTGTGTTCCCTTATTTGTTGATGATGGTGAGGCTAGTGAGGTACATGATT  
GAGTGAGGCCAAGGGCCTGGTTGTGAGGATATTAATACCATAGCGCGTGAGTTGTCCGCGTAGCACGTGAGT  
TGACCGTGCGGGTCCAGGTATTGATACCATAGCGCGTGAGTTGTCCGCGTTGCCCGTGAGTTGAC

>TCONS\_00080090

AAAAACATTAATCCTTCCATCTTCAAAGATCTTGCACGCTCAAACCTGGAGGAAGTGACTGCTTCAACTTGTC  
GGCCTTCTCAAAGTCGGACACACAGAGTGTGTAGAGGTACTTGGAGCAGCGAACCTTGAATTTGACCATATC  
CTTATTCTTCTTGATCTTGACAGATCGTGCATCCTTCCTTCTTGCTGTGAGAAGGAAATCCTTGATTTTCGTGGAT  
TTGCTTCGGCATGATAGGGTCTTCGGGTTAGGGTTTGTGTTGCTGTGCTGCTGCTGCTGCT

>TCONS\_00080110

CTATTCTCTTTTCAGAAGGGAGGGAAGGGGGATGGAACAACAGGTATTAAGAGGAGGGAGACTCGTTTTAAA  
GATATGTCCTATACTACCACAGCCGCCAAAACCTTTAGAATGTGAAGCTTGGTTCAACATCCATCGCCCAGGC  
AAACTTTGCTAGAAGAGACTTTTTGAACATCTTTTCTATGGGAACCTCATGGCGCTTACACCATGCCACTGTG  
ATCCTAGGATCCAGATAGTTGATTTTTGATGTGCCCAAAGCCACA

>TCONS\_00080310

ATCATACTCCTCTTTTCCACTGCTTATGTTAATAAATGAATAGGAACCGAAAATGTTTCCTTTAAGAAATCTCT  
TCTCATATATTGCTTCTTTCACATTCGGACCATCCATAATTTTGTTTTCATAGAACTCTCTATTTGGAAACAAAC  
TTATTGCAGGATGCATCCTATATTGAACATTAAGGAGGTGCTTCGTGTGCCCAATCATTACCAGCCTCTCAAA  
TAAGCTCCTTCCAAAGTCAGCCTTCTCAGAGATCTTGCTCTGAACCATTGCAGGCAATGGTTTCTCATCCCCA  
ATAAGTATGGCATGACGTATACCAG

>TCONS\_00080400

CTTCAGCAGAACCCTGCCTCCTCTTTCGTGGAGGGCGCTTATTAGAACCTCCTTCATTAACCTGGGCAGCTCTCT  
ATTATCCTTTGTCTAACATCATAGGTGCGTAGAAGCACTTCAAATGTTCTTACATCAGTAAAATGTGATTTGAG  
TGCTTCACAAGAGCGTTGTACTTGCTCAATGCATGGAGAAAAGGAGTACAATACCCCATCTGGTTTCAACATT  
TTTCCAGCAGAAGGAATGAC

>TCONS\_00080405

TTCTCTTCACTTTCTTGATCATCTTCCTCAATTGACTCCACAAGACTCCAATGACTGTGTTGGAACCTCAAAA  
ATAGAGAAGGATATGCTTCCGGGAGCTATGAAAAGGCAAGACTACGTTTTGCTCATGCAGAACTCTACTTC  
CATTTTCATGCTTGCTTGGGCTCTTCTTGAAGAATCTGGTGAGTGTATCAATAGGATTATTTAGGCTTCTA  
CTGCCTCCAGTTTCTTAATCAATTTTATACACTGAATGTTGCAGAATTTGAACTAATACAAAGAGAGGAGACG  
TTGCA

>TCONS\_00080407

GCAAAACGTAGTCTTGCCTTTTCATAGCTCCCGGAAGCATATCCTTCTAAAGGAGGAGAATACACATAAAAC  
GAAGAACACCAGATATCAAATTTCCATCATTTAAAGGATTAGCTTCCATAGAAGATATGTACAGGCCAAAAAG  
ATTTCTAGAGAGATGAATGCGAGCAATAAAGGAAGGTACTAGTTACTAACAATAACAATACCAAGTAATT  
GGTATAATTAAACAAAATAGTAATTGGTATACTAAAGGCTCCACTTTCTAGCCTTATACAACCTATCCTCTAGT  
CAGTAGTTGAAGGGATAGCAGAATAACACAGGCAATAGAGTCATGGAATAAGAACAGAATCGGTAAAATTA  
ACAGGTTATATGGGAAATATAACATATAATGAAGTTGACTTGTCTTTCTTTAATAAGGAGAGAAATCCATGG

CCTCACACACACATCTACCTTCAAATGTATTTCCCCAAATGGTTTCCACTTGTTGGATCCATACGGTCAATTGT  
TAGCCTTCCTCATATACCTCCAAGACTCATCCCCGATAACCTTTAACCCTTTTCTTTCCCTGGACCCATAGCA  
ATTTTATCCGGTCCATGACCCTTATAATAGGACAACACCCCATCTTCAAGCACGAACCATCTCGCACGCCATC  
CTTTCCCATAATTACCCATTTATATAAACTCCAGCTACACTAACACTTCCATTTCCACACTAACACTTCCAT

>TCONS\_00080409

CAACATGACCAAAAATAATTGTTTCTTATTCCTGCTCATCCTCGGATTCTGTGTTCAATTTAACTAAATCGAATC  
CACATCCCCAATTTCCCATGTCAGCCACCTCGTCACAAATATCCCTTCTGCAACAAAAATCTCCCTATCTCCAC  
TAGAGTTCAGTCCCTTATCTCCTTACTCACCATTGATGAGAAGATCTTACACCTCTCTGATAA

>TCONS\_00080513

CCCAATCATGACAAGCAGCAAAAAAATGATCAGCTCCTCTGCTTCTATTCCAGAATTGATATTTTCCAGAAAT  
TCTTCCAATGTAATTGCTGAGATGATTTTCCAATTCTTTCTGATGAGTAAAATTTTGTGTTGAAAGAGCTTCTCT  
TAGCCTCAGAGAACTAAAAGGCAAATAAAATAAGTGAGCCTTTTTGGGATCTTTCACAAGAAATTGTTTGTT  
TTCTCCATCAGTTTCATAAACCCACCCTTCAGAAGCGTAAATACCTCGTTGATATGGCTGATGGAATATTGGTT  
TTTTCCCTTCCTTATAAACATAAACTTTAAGGAGGCGTTCATTAGCTCATAGCTCCTCGTAACTTGGAATAA  
TTTCGAAAGATAGATGCATGAACCTTCTGGAACGTTTACAATTATCGGAGAATTTCAATCTGAAACTTTGCATT  
TCGGAGTTCAGTTCACGTGCAGAATGCCATTGAGATCTCACTAACTAACAGAATTCTGCAACACTAAAGA  
GTTTCATGTAGGAGATTGATGTCGGTC

>TCONS\_00080581

AGCTGTTGCTGTGGCATTCTCTTCTCGACCTCTGCCCTGAATCCTTCTACACCAAGTTCATCGATTAACCTCATC  
ATTCTACATTTCTGTCTGTTCCCTCTGAAACCAAGATCTCTAAAAGCTTCTAGTATTGCTTTGCAAACTGGAAC  
AACATCATCGGCTGGAACCCATGCATCAAGAGGAATTGCCTCATCACATCTTTTTGCGCTGAAGAACCCACC  
CACAAGCAGGTTGAATCCAAATCGTCCATCTTTC

>TCONS\_00080642

CTGAACAATCTCTAGCAGAACTTGTTTCATAACACACCAAGATTACATGATATTTATAACAAACATATCAAGA  
GTGCTCCCGAGCAAAATTCTATCACTAACATATGCCAAATTTTCTCAGAAAAAATAGAACCCATAAAATCAT  
ACAGAAAGTCGCTCCTAATCGAAAAGACTGAATCCCATGTCGTCATCGCTTCTCCTTAGGCTCTTCCTTCTT  
TTCCTCAGCAGCTGGAGCGGCCGCAGCAGCA

>TCONS\_00080658

CCGCGGCGGCGCCTCGTTAAATTTCAAGGTCATGAATTAAGACCAATTTTAGGACAATTTGGTCCTTTGGAGC  
TTTCTACTCCACATAAAAATTCGGTATCTAATTTGACGATTCCTCAAATTTGGCTCTGGAAATTTTGTAAAGC  
TCCACCTGGTGAAGTTCAGCCTTGACCTAGTAAACCTAGTTGCAGGGTGAGCATAGTTTGGTAAAAATATCA  
TTTTCCGGTGGTTCCTCTCCGTGACAGCTGGCGTTGATTTTGGCCGCTTTATTCCGTCA

>TCONS\_00080709

GGGAACAAATATCTATTTCCCGACATGGTGAGGCTCAAGATCTTTGAGGAGGCAAATAGCAAATTCAAAAG  
ATCAAGGGGCTCTTGGTGTGTTTTTCACTTCTCATACACAAGGGTCCAAGTCATCCAGTTTCCCTGTGCA  
GTCAAAGTAGCTGTTATGGACTTGATAATTCATTCATATAACCTTCAACGAAATTGAAGGTGATTGATTTTTT  
TGCATCATCTATGTGTAGGACCTGTTTTGCATGCCTCTCTTTTCCCTCCCAACTGACCCTCATGTAACGTGAAATT  
TTTTATCTTATCAGGAGACATGGTGGAGGTTTGGTGTGGATTTGATTTGAAGTGTTTCATGAAGCAAATCTCCAG  
CACACTTCATCTCTATTTGAGAGATCAACTTGCCTTTGAGACCCATTTGTTAGCAGTGTGAGATTTTCTTACAC  
GAGTTTGTGACCCTCATGTAACGTGAAATTTTTATCTTATCAGGAGACATGGTGGAGGTTTGGTGTGGATTTG  
ATTTGAAGTGTTTCATGAAGCAAATCTCCAGCACACTTCATCTCTATTTGAGAGATCAACTTGCCTTTGAGACC  
CATTTGTTAGCAGTGTGAGATTTTCTTACACGAGTTTGCTGATTTAATTTA

>TCONS\_00080792

GTCATGCCAATTCTAGGAGTAAGGCCAGTGGCTCCAGGAGTCGCTGAAGGAGTTAAGAGTGGGTTTGGCGTT  
TGAACCTCCCTTTTTCTTAGGAGTGACACCAGAAAAATCTGAGGGGTGCAGCATAGGATTATCCCCTCCAAGT  
AATGGTGTCTGAGACTGAGTCAATCTTCGTTGATTTTCTGCTTCCATCATAATAGCATCTTGCTTAGTTGAAGG  
GGTCTTTGAGGTGTTTCGCATAGGAGTCATTGCATGATGTGGTGTCTGGGCATAATTTGCAAGAAGAGCACGT  
GTTGCAGCATTCCCCTTCGAGAGTTTCATCACCCCTAGTAGATCACTGGCCATACCTATCTTTGCTATGGCTTC  
CAATTCATGGTCTGGAATCTGTGGTGCAGGAAGATTGAGCTTCAACCTCTTCCTCACTGCTTCTGGGTCAATTA  
GTTTATTTGCATGCAATATGGTTGTAGGGGCATCCTGCCTTTCTGCAATTTTATTCTAGCAATATCCTGCTTTC  
TTAAACGAGCTTCCTTATCGACTCTCCTTTCACCTTCTAGTTCTTCAATGGTAGTTGGAACTTAGGTTGCTCTA  
CTGGACGGTCTTCCTCAGCGACATCATAGAACTGGAGGAGGCTTCTTTTCAAAGGGTATTTTCAGCATTGTA  
ATCAATTTCTCTCCTTTTTCTCTTCCTTTGACGGGCATCTATTCCAGCAACCTTCAGTTCTCTCCTTTTTCTGTAAG  
GAAGCAAACCTTCGAGCCTCTTCAAGCTGCTTTTCTCTAGCTTTCCTTTTAGCCTTCTTACCTCTTGTGTTGGCC  
TACCGAGCCCGTGCTTCAGACAGCATTTCTTTCTCATCCTCGTCCATATCAACAGGATCAGGACGAGCAGGCT  
TTGATTCTGGATTAGGATCAATCTATCCAGGCTTCAATTTTCTTGGATCATCATTAGGGTCATAGTTTTCATCCT  
TAGCACATGCTGGATCGAGAAGCGTTTCATAGCGTTCAAGGCACTGGGATGGTGTAAAGACCAACAATTGGCG  
C

>TCONS\_00080801

CTTTCATAAGCTTATCAGAAGTGAGTAGAGTTTTTCCGTAAGAACCCTCTTTCCTTTAGAGGCTGGTGATTGGG  
TGAGAGCCTTTTACAGGCGTTGGCTCTCACTCTGACCAGTAACCACACACTCTTCTTTGCAATGGCTGTCTTCT  
GTCAGTCTCCCCTCAATCTCAGCCTCATCACCTCCTCAGCAATCTCAATCCTAATCCCTCCTTTAGACTCAAT  
CTCTCCTCTCACACTCGCACCCCTCGTCACTGAGCCCCCACCAGTTTTACCTGCGTCAAGTCATTTGCTCCCGC  
CACAATTGCCAATCTCGGCCCCGGTTTTCGACTTCCTTGGCTGCGCTGTGACGGCATCGGCGACTACGTCACT  
CTCCGCGTCGACCCCAACGTTACCCCTGGCGAGGTTTCTATTTCTGACATCTCCGGCGCCGGCAAGAAGCTCA  
ACAAAAACCCCTCTGGAATTTTGCCGGTATCGCCGCC

>TCONS\_00080984

GAAGGTTTAATAGATTATTACATGGGTAGCTAAGGAAATCTGCAGCAAGATATTGAATCTTTGCCTTTTAAAG  
CTAAAATAGGCTGAGAGTGCAATTTTGGCATTAGACTGTTGCGGGGAGATATTAGGATCCCAACGCATCAGG  
GTGAGTCCTTCAAAAACACCAGTGAGGCCACGACTTCCCCGTGCCATGATGCAGTAACCGATGCTATGGAAA  
GAGTTCAGGAAAGCCCTCTTGGAAGACTTGAGGTCACCATGGGAAGGCGAAACATAATTCTGTTTCAGCAAT  
TTCCATCTTTCTTTTTTTTTTTTTTCTGTTCTGCCAACACAGTAACTTTATTGGTACTGAACATGGCATTACCTTT  
GCGATTAACGAACACTATTATCGAGAATATCCCTACCTTTAGTATTGTTAGCTTGATCAGTCATTTTCTTATGAA  
TCTCATGCTGGTTGAATGCCGGTTCATAATTTGATCTTTCGTCTCTGGACGCAGCATTACATGTTTCCTTTTTCT  
CTCAGTGCAGGGGAAAGAAACCTGCACCTGGTGTTTTACACCAAACCTACATAAAGTTACCATGATTAAGTAT  
AAATTGATTTGAGATAAAGTGATCAAAGTGGATGCGGAAGACATATGTCATGTATTCCTTCGTGTGGTAAATT  
TTCTCCTAGTGCATCTCTGCAATCACATAATCAAATGTGATTGCGATCTTTAATAAGATGATAATATTGACTTA  
GTTTGAGCTTGCTTATTATAGCGAGAGAATCAAAGGGAAGAGGAGCAAGGAGAAGAAAGAGAGAGGACA  
CTCAGATTCTTGACCACATTTCTATCTGTTTCTTTTCTATAGTTGTAGTGTCCGGGCCAATAATTCGACTATTT  
CATCAGGGGTTTTCTTTTTCTATAGCTTCTTTTATATTCCACCAATTTTATTGTGTAATATAAATGTGAATTAAAG  
GAACTACTACTTTTGAATCTATTCTTTCTGTGCCTATATTAAAGAATCCATACTTGTCACTCCGTCGACTCCCT  
TCCCTCGGGAGTGCTGGCCCTTCCTCG

>TCONS\_00081064

ACCTTGTTAATCACAAGAACAATCGGATTACGTTCTTGAATCGCATGCCGAATGGCCCTTTCTGTATTTACCAT  
CACTCCTTCAACAGCATCAACAATCAAACTGCACCATCAGAAAGTCTCAAAGCAGCTGTCATCTCATCCGA  
GAAGTTGACATGACCAGGAGCATCCATAATGTTGCAGAGGTAAGACTTTGAATTGCTGTCTTCCAGGACGAG  
TGACATAGGGACAGACTTAATTGATATCCTCCTTTCTTGCTCATCTATTCTTGTGTCTGTATACCTCATATGCTT  
CTCACTATTCTGATCAAAAGTAGATATATGGTGGGTTTGCTCCACCAGCATATCCATAAAACAAAGTCTTCCCG  
TGATGCACGTGTCCCACTAAAGCAACATTTTGAACCAATGCTGGGTTTCGACATCAGACCTAAGAGAAATTGA  
GTCGAAACATAGGTGGACGAATCCTTTACCCCGAGTTCAAACCTTGAGATTCTTCACCGGTTTAATTATCGGCA  
TTTCAAGAGGCTGTTTCATCTTCATCCATCACCAATGTCTCGACCTCTTCACCGTAAACCTCTTCGGCTGTTGGG  
TAGTATTTCTTGTCTTCAGCAAGGACAACCTTGTTATCCATGTCAACATCCTCTTGAGTGGCCAGCCATCCATT  
CGATGCACCAGGTTGCTCGCCATCAGATGCAGCCCTCTCATCATCAC

>TCONS\_00081091

CAATATCGGAGTCAACGCCGGCGCCGGCAGAATCATTTCTCTTAGCAAAACGACCTTTAATTCTTGGCCTTGT  
TTCAGCATAAGCTTTTCTTGAAGCATATCTTATAGTTTTCTCAAATTTCCGATTTTCTTCTTTTCTCTGTATCTTA  
AAACTCTTGCTTCTCTATTCAATCCAATTAATTTTTTCTGCTTGAGCTGAATTTCCCATTTCAATATTGCTATTCA  
CACTTCTAACAAAAGGGTATGATATTTCTGAAATTGAGCTCCCATCTGGTACAATTCCAACATCTAAAGACGA  
TGATGACACTGGAAGTTTGGTAGTCATTGTGTTTGGAGAAATCCATGGATCAGAATTATAGTCTTCTTCATGGT  
GTCCGAGACAAGCTGTAACCTTTACTGAAGTCAGTGGCTACGGCCGTAGTCGT

>TCONS\_00081217

CGCGGGTACAGATACTAGTAATGCAGAAAAGGAAAAGCATGTAACACTATCCTACCTAAATCTACACAATG  
ACACCTTGATCATTCCCGATTCAACCATACTAATTACATGTTTAAAGAAGAATATCAGCAGCACTCCAATCC  
ACAAGGTGATCTATTACACAACAGGCTATAAATAGTAACAGAGCATAACATCTATTTCTCTGCTTTTTTGC  
CGGATTCTCCAGTTGGGACTCAACTGTATTTGATAGCTGCTCACGGATATAAGCCATTGACCTCAGCATGGCA  
GCTAAAGTATCTCTTGAAACCTGAAATTTACCTCTGATTCTCCTGAAGTTGTTTCTGTATCTTGAAGCTTCAG  
ATTGATGACAGCAACTCTATTAGCCGGGGTGGAAAGCTGCTCGCTTATATCAGCCATAGACTTCAACATGGG  
CTCTAGTGTGACACGCGATAGCTGAACTTAACCTCTGATTCTCGTGAAGGAGTCCTACTGTAATCTTGCAGC  
TTCAGGTTGATGACAGCAACTCTATTTCGAGGTGTAGAAGTTTTATTCTCCATCACCCAAGTCAATGACTTGA  
GGCAAGGAAGAATCACCGTGTTATCTGCATGACCATCATCACGGTGAAGAGACACAGGGGCCATGCGCTGG  
GCATTTAAATCAGCAATAGTCCTAGCAGGAATACTAGTGTCAATTAAGATTAAAGCGCTTTGTCATTTTCATCTT  
GCCGTGGCCACAATAATGGCGTCATTTCCGGAGCAGAGGCAGACGTCTCCGATCATCATAGCCAACACCGC  
TAACCTGTGAGCTAGGAGGTGAACTTTAGCAACATTTCTTTTTGCAAGAGCCACCTTCTTTCCTCCTTCTTTA  
AGAGCAGCTAATGCAGCATTATATGTTTCTTGAGCTACAGCCCCCTTCTTCAGCGTATCTTATGGCTTCCCTGCA  
GAGACTGTTGTATTTCTGTGCCATTGATTCCGTACCATGTAGTTGTACATGTTTCATCTGATTACGACGCGCATT  
TTGCATTTATTGTCCACCGCTTCAAGATGTAACGAGATGGCAATGTAAGAACATTAGTTACTGTAAAACTGT  
AAGAATATGTCTACAGAGGATACCACTACATTCAAACATCTGGCAACTACAATTTGCTTTTCAGTTTCAGATATA  
TTCAGCGAGACAATGTATGCTTTCTGGTCATCCTCAAATTTTGCAACCCTGAATGTGCTGAGAGCCCCATCTCC  
ATCAATTCTGTTTGCAGTGTAGACAAATGTCTCCACTAACTCTTCTTGAAATTTTAAGAATATTTTCTTCGTGTA  
TAAAGTTGCTGCCTGTTTCTCCATAGGAGATGGTGTCTTAGTGGTGGAGTAGTGCATATTGTATCAAAATCG  
GCTTCTATTTCTTCTCAAATGAATTTCTCAAAGCTCTTTCATACTGCCTGAAGAACAATGGCAGTGTAATTTG  
TTGATTCACATAGCCATCGAAAAATGAGCATTATATTCCTGGTTAGGAGAGAGGGCTGCAAAGAAAGTATC  
ACGAAAATAAGCCGGTACCCACTGCCGACGTGTATTATATATGGATTGAAGCCAATCATTCTTCTTCAGATCA  
TACTTTTCAAGGATTGTCTCCCAATATGATTCAAATTTCTCAACTGTCTCCGTCAAATTGATACAATTATAGAG  
TTCAACTTGAAAATTTGGGTACATGTGACATACATGAGCCATTCTGTCTGGCCACCCCTTAATACATGCCAC

TTGTTGATACAATGCCGTGTTCCAGGAAAACTTGAGCAACTGCAGATTGTATAACAGTGTCTGATCAGTAA  
 TTATGGAGACAGGGGCACGGTCATTCATGGCAGCATGGAAGGTCTTGAATAGCCAGACAAATGTAGCCTCAG  
 ACTCATCTAGAAGAAGTGCACAACCAAACAAAATTGTCTGACCATGATGATTTACTCCAGTGAATGGAGCAA  
 ATGGGACTCTGCACTGATTAACCTCTGTACATTGTGTCCAGTATAACGGCATCACCAAAATGACTATATGCATT  
 TCTTGACCTTGATCAGCCCCAAAATACATTAGCCATGCGATTATCTTCGTCCAATTGTATGGCATAGTAAAAT  
 CCAGGATTCTCAGCCTGCATTTTCTTGAAGTAATCAAGAAGATTCTGAGCATCTCTTCCTAATGTTCTTCGTTG  
 ATTGCATTGTCTAGGAGAAAACTCTGAGGTACAGTATCCTTAACCTGTTTGATCTGACTCTGCAGGACGAGTA  
 CTCTTAGCTCCACGGCTAATCTCTAAAGGGATGCGGTTACCATCTACAGAGACATACATTACACCACTAGGA  
 ACAATTCCTACACCCTGATTATTCTCAGGTCCATTCTTTTTTGCCACCTCAAAATGCCTGTGTGATGTGTGGTA  
 ATGCACCTTATTAGGATGCACAAGGGAGTGACTATGCTCCTTCATATATTTGGTCACAACCCACTTGTTTTGAC  
 CTTTTAACTCCACTCTAAGCATTGCATCACAGGATTCACCGTACACTGTTCTCAAACCATTACATAAGAAATC  
 AGTCTTCAGTCGATTAACTGATAGACATGGGTGGTAAAACCCAAACGCCTAGCGTATTCATCATAGAAATT  
 CTTAGCCTGATCTTCAGAATGAAATACCATAACCTTTTTGTGGCTCAACAACCTCATCCCGTTCAGGTGCATTTG  
 ATCTTCCATTAACATTTGCTTCTCCACTCTCGCTGGGTTTCATCATCACCGTCATCAGTTATGCCACCTTGGTGT  
 GCATATTCCCCTGTTTCGACATCGATCACTTCAACATCCATCCCAGAACATGTAAACCACTTTAGAAAAACGCA  
 TCACATCTCTAGAGGTGCTCCAGCACATATCCCTATGATCGGAGGAGAGAGAATCAAGGCCAAACGGATCTC  
 AAACAATTTGCGTTATGAAAAACGGAAGTCCAAAGTTGTGTGAATTCTTCAGAAC

>TCONS\_00081218

GTACAGATACTAGTAATGCAGAAAAGGAAAAGCATGTAACACTATCCTACCTAAATCTACACAATGACACCT  
 TGGATCATTCCCGATTCAACCATACTAATTACATGTTTAAAGAAGAATATCAGCAGCACTCCAATCCACAAG  
 GTGATCTATTACACAACAGGCTATAAATAGTAACAGAGCATAACATCTATTTCTCTGCTTTTTTGCCGATT  
 CTCCAGTTGGGACTCAACTGTATTTGATAGCTGCTCACGGATATAAGCCATTGACCTCAGCATGGCAGCTAAA  
 GTATCTCTTGAAACCTGAAATTTACCTCTGATTCTCCTGAAGTTGTTTCTGTATCTTGAAGCTTCAGATTGATG  
 ACAGCAACTCTATTAGCCGGGGTGGAAAGCTGCTCGTTATATCAGCCATAGACTTCAACATGGGCTCTAGTG  
 TGACACGCGATAGCTGAACTTAACCTCTGATTCTCGTGAAGGAGTCCTACTGTAATCTTGCAGCTTCAGGTT  
 GATGACAGCAACTCTATTTCGAGGTGTAGAAGTTTTATTCTCCATCACCCAAGTCAATGACTTGAGGCAAGGA  
 AGAATCACCGTGTTATCTGCATGACCATCATCACGGTGAAGAGACACAGGGGCCATGCGCTGGGCATTTAAA  
 TCAGCAATAGTCCTAGCAGGAATACTAGTGTCAATTAAGATTAAAGCGCTTTGTCAATTCATCTTGCCGTGGCC  
 ACAATAATGGCGTCATTTCCGGAGCAGAGGCAGACGTCCTCCGATCATCATAGCCAACACCGCTAACCTGTG  
 AGCTAGGAGGTGAACTTTAGCAACATTTCTTTTTGCAAGAGCCACCTTCTTTCCTCTTCTTTAAGAGCAGCT  
 AATGCAGCATTATATGTTTCTTGAGCTACAGCCCCCTTCTTCAGCGTATCTTATGGCTTCCCTGCAGAGACTGTT  
 GTATTTCTGTGCCATTGATTTCGGTACCATGTAGTTGTACATGTTTCATCTGATTACGCACGGCATTGTCATTTAT  
 TGTCCACCGCTTCAAGATGTAACGAGATGGCAATGTAAGAACATTAGTTACTGTAAAACTGTAAGAATATG  
 TCTACAGAGGATAACCACTACATTCAAACATCTGGCAACTACAATTTGCTTTCAGTTTCAGATATATTCAGCGAG  
 ACAATGTATGCTTCTGGTCATCTCAAATTTTGCAACCCTGAATGTGCTGAGAGCCCCATCTCCATCAATTCT  
 GTTTCAGTGTAGACAAATGTCTCCACTAACTCTTCTTGAATTTTAAGAATATTTTCTTCGTGTATAAAGTTG  
 CTGCCTGTTTCTCATAGGAGATGGTGTCTTGTAGTGGTGGAGTAGTGCATATTGTATCAAAATCGGCTTCTATT  
 TCCTTCTCAAATGAATCTCCAAAGCTCTTTCATACTGCCTGAAGAACAATGGCAGTGTAAATTTGTTGATTAC  
 ATAGCCATCGAAAAATGAGCATTATATTCTGGTTAGGAGAGAGGGCTGCAAAGAAAGTATCACGAAAAT  
 AAGCCGGTACCCACTGCCGACGTGATTATATATGGATTGAAGCCAATCATCTTCTTCAGATCATACTTTTCA  
 AGGATTGTCTCCAATATGATTCAAATTTCTCAACTGTCTCCGTCAAATTGATACAATTATAGAGTTCAACTTG  
 AAAATTTGGGTACATGTGACATACATGAGCCATTCTGTCCTGGCCACCCCTTAATACATGCCACTTGTTGATA

CAATGCCGTGTTCCAGGAAAACTTGAGCAACTGCAGATTGTATAACAGTGTCTGATCAGTAATTATGGAG  
 ACAGGGGCACGGTCATTCATGGCAGCATGGAAGGTCTTGAATAGCCAGACAAATGTAGCCTCAGACTCATCT  
 AGAAGAAGTGCACAACCAACAAAATTGTCTGACCATGATGATTTACTCCAGTGAATGGAGCAAATGGGAC  
 TCTGCACTGATTAACTCTGTACATTGTGTCCAGTATAACGGCATCACCAAAATGACTATATGCATTTCTTGACC  
 TTGCATCAGCCCCAAAATACATTAGCCATGCGATTATCTTCGTCCAATTGTATGGCATAGTAAAATCCAGGATT  
 CTCAGCCTGCATTTTCTTGAAGTAATCAAGAAGATTCTGAGCATCTCTTCTAATGTTCTTCGTTGATTGCATTG  
 TCTAGGAGAAAACTCTGAGGTACAGTATCCTTAACTGTTTGATCTGACTCTGCAGGACGAGTACTCTTAGCT  
 CCACGGCTAATCTCTAAAGGGATGCGGTTACCATCTACAGAGACATACATTACACCACTAGGAACAATTCCT  
 ACACCCTGATTATTCTCAGGTCCATTCTTTTTTGGCACCTCAAAATGCCTGTGTGATGTGTGGTAATGCACCTT  
 ATTAGGATGCACAAGGGAGTGACTATGCTCCTTCATATATTTGGTCACAACCCACTTGTTTTGACCTTTTAACT  
 CCACTCTAAGCATTGCATCACAGGATTCACCGTACACCTTTTGTGGCTCAACAACCTCATCCCGTTCAGGTGC  
 ATTTGATCTTCCATTAAACATTTGCTTCTCCACTCTCGCTGGGTTTCATCATCACCGTCATCAGTTATGCCACCTTG  
 GTGTTGCATATTCCCTGTTTCGACATCGATCACTTCAACATCCATCCCAGAACATGTAAACCACTTTAGAAAA  
 ACGCATCACATCTCTAGAGGTGCTCCAGCACATATCCCTGAAGATGCCATACATAACCACGTCACGACCTATT  
 TACCATAACAATCATCTTTAGCTGCTATTCTTTTCATCCTATGATCGGAGGAGAGAGAATCAAGGCCAAACGG  
 ATCTCAAACAATTTGCGTTATGAAAAACGGAAGTCCAAAGTTGTGTGAATTCTTCAGAAC

>TCONS\_00081280

CTTAATTCTGTCTCAGTCACCGTGTGATCGGCACGGGTTTCGATCCCAACCTGATCGAATAGGCCCAATCCACG  
 AGGTGCCACTCGCTTCATGGTTCTCAGCGCTCATGTATCATACCTTAGCATGGCTAAGTAAATTCTCAGCAAC  
 GAGACCCTCGGCTCGTGTGCTCCCTACTTTGGCACAAGTAGTTTCAGGAAGTCAA

>TCONS\_00081370

CTATTGATCACTTGAAGATGGTGATGAAGGCTGATCAAACACTATCTTTGCAAGTTGTGTGTATTTACTCCCTA  
 GGTCATCATATTTATCCTCTAGCCCTTCCAAACGTCCTTTTAGTGATTCAATTTCTTTTAAAGTAGCATTACAGCT  
 TTTCCAACAATGCACCTTTAGAGGAGTTACCACCTTTCAACTCCTTAGCGGTTATCCCACCACCAAATCCAAC  
 TACATGACTCTTTTGTGAGGTCCGAAGCACCTTTCTACAACCTCAATGTTTGTAAGAGACGATTACAGATTGCA  
 CCAATTCTTTGATTTGATCATATTTCTCACTGGTTTCAGGTTTCGACAAGCTTGTTGTTCTTCTTACGAGTCTCAA  
 AAAAAATAGTTGCCATATCTGGTGGATTACCATCTTTACCTCCCAATTCATAAATGATCTCCCTAATCGGTTTA  
 CTACCCGTACGATGAGGCATACTCAACTTAGACCTATTGACTGAGTTTCTTGTACTTGTCTCCTTAAATTTTCA  
 GTAAAAAATGCTCCTTGACCAGCCATACCCAATCACTCTTGTCTACCCCTGTGGCACATCTTTTATAGCAT  
 AACGGAATGGCTTAGACTTAATATTCTTGTGCATCGATCCTCTCCAATTGTTCCATAACTTTCTCATATGTTTCA  
 AGACATTATCTCGTTGATCATTTATGTCATCACGTAACAGCTTCCCACATGTGTTGTAGCTTATATTCCTCGAT

>TCONS\_00081371

CTATTGATCACTTGAAGATGGTGATGAAGGCTGATCAAACACTATCTTTGCAAGTTGTGTGTATTTACTCCCTA  
 GGTCATCATATTTATCCTCTAGCCCTTCCAAACGTCCTTTTAGTGATTCAATTTCTTTTAAAGTAGCATTACAGCT  
 TTTCCAACAATGCACCTTTAGAGGAGTTACCACCTTTCAACTCCTTAGCGGTTATCCCACCACCAAATCCAAC  
 TACATGACTCTTTTGTGAGGTCCGAAGCACCTTTCTACAACCTCAATGTTTGTAAGAGACGATTACAGATTGCA  
 CCAATTCTTTGATTTGATCATATTTCTCACTGGTTTCAGGTTTCGACAAGCTTGTTGTTCTTCTTACGAGTCTCAA  
 AAAAAATAGTTGCCATATCTGGTGGATTACCATCTTTACCTCCCTTAAATTTTTCAGTAAAAAATGCTCCTTG  
 ACCAGCCATACCCAATCACTCTTGTCTACCCCTGTGGCACATCTTTTATAGCATAACGGAATGGCTTAGACT  
 TAATATTCTTGTGCATCGATCCTCTCCAATTGTTCCATAACTTTCTCATATGTTTCAAGACATTATCTCGTTGAT  
 CATTTATGTCATCACGTAACAGCTTCCCACATGTGTTGTAGCTTATATTCCTCGAT

>TCONS\_00081383

CAAGAGTCATAATTTCTATTCTAATAACAACCTTAAAAGCAAATTTTCTTCCAGTAACTTGTGCATTGATGGA  
CCATATTGCCAGCATGTTGGTTTACTCATGATCATCCCGACTCGCACGCCTTCTTCTATATCAGTTGGTGAAAC  
TTTATCACCCAATCCAACAACAACTTTGCGATTTGCTTGATGTTTATAACATATTTTGCATCTTCAGTGTTGG  
GACTAATTATCTTTGTACACCTCG

>TCONS\_00081414

GTTTCTTCTGAGACATCCTGAAGCCCTAAGTTTCTTAAGCTGGCAGTGACATCTTCTGCTGTTGTTGAAGAGT  
TGTTTTTAACCTCTTGAAATTCGGATCTCAGCTGGTCCACTTCAACATTCAGCGATTTCTTGAGCTCCGACAATT  
CATCACGATAGACCTTTACTTGCCATCCAACCTTGATCTCCAGCTTGAAGATCTGTTTTCAAGCTCTGAATC  
CTAGTGAGCAGCTC

>TCONS\_00081435

TACCGCGGCTACTGGCACCAGACTTGCCCTCTAATGGATCCTCGTTAAGGGATTAGATTGTACTCATTCCAA  
TTACCAGACTCATAGAGCCCGGTATTGTTATTTATTGTCACTACCTCCCCGTGTCAGGATTGGGTAATTTGCGC  
GCCTGCTGCCTTCTTGATGTGGTAGCCGTTTCTCAGGCTCCCTCTCCGGAATCGAACCCTAATTCTCCGTTA  
CCCGTCATCACCATGGTAGGCCACTAGCCTACCATCGAAAGTTGATAGGGCAGAAATTTGAATGATGCGTCG  
CCGGCAGATGGGCGTGCGATCCGTCGAGTTATCATGAATCATCGCAGTAACAGGCAGAGCCCGCGTCGACC  
TTTTATCTAATAAATGCATCCCTTCCGGAAGTTGGGGTTTGTTCACGTATTAGCTCTAGAATTACTACGGTTA  
TCCAAGTAGTAGATACCATCAGACAACTATAACTGATTTAATGAGCCATTCGCACCTTTCACAGTCTGAATTT  
GTTCACTTACACATGCATGGCTTAATCTTTGAGACAAGCATATGACTACTGGCAGGATCAACCAGGT

>TCONS\_00081470

CAAGGCGTTGACTTCTTGAACTACTTGTGCCAAAGTAGGGAGCACACGAGCCGAGGGTCTCGTTGCTGAGA  
AATTACTTAGCCATGCTAAGGTATGATACATGAGCGCTGAGAACCATGAAGCGAGTGGCACCTCGTGATTG  
GGCCTATTCGATCAGGTTGGGATCGAACCAGTGCCGATCACACGGTGACTGAGACAGA

>TCONS\_00081861

CTGCAAGTCAAATTCTCTTAGTGGATAACTCTTTTCAAAGATATTGTTTGAAGCTTCTGTAACGTGTTTTGCA  
AATCAAAGTGGAATGTGTTTCCATATGAGCGACAAGGAGCAAGCGACCAAACAACAATAGCATTGCAAGCC  
GTTACAGTAAGCACATTAAGAAGGGCAAGATCCCACTCATGCTTTATCCTCTCCTTACGGTTTTTGTATCTCCC

>TCONS\_00081930

TCCTTTTCTGCAGATCCAACCTTTTCTGGGATTCATCTGCCCTTGCGATTTACGGCTTGTGCTAGCTTCAGTT  
CCCCTTTTAATATTTTCGTTTTGGTTCCGATTCTGAAGGGTGGCAGTTGAGTTGCAATTTGGGGAAGAACCAGT  
AGGACCTTGAGATGTAGAAGAAGAAGAAGCACTAGAATTTGAGTTGTTAGGAAGATCTAAAATACTGA  
ACCCAAAGAATAGAAGCAAAACAAGAAGAATCATCACCCTAACTGAATCCAAATTAACCATGGCACTTTG  
TAGTTCTCAATTATTAGCTCTTCCCCAAATTCATACAT

>TCONS\_00082022

AAACATGCTTGGCCCTGTGAAATCCTGATTGAAGGGGCTTGTGGTCTCTCAAATGGCTTGTTCATTCCATTCCG  
CCATGGTGCTAGTACCTGCTTTGATGAGTCACGAGCTTGAAGGGACTTATTCTCGGAATCCAAATGCAAGTCC  
TGTAAGCAAATCCGCCGTTTCTTAAGCAATGTGAATTAAGGAGACAAAAAACATGCCATAAA

>TCONS\_00082064

CCCTTTTCATAAATTAATTAGGTAATAACAAGATACGTGGCGTAATATGGACCGGCCATAAGTACATAACAG  
TAAACGTGGCATAATATGGACCGATAGTCTAAGAAGGACGACGAACAGAGTTTATGTAATCTTCAAGTGCTT  
GGATTTGCTCTTCAGAAGGTGGTGTTCGTTGTTCTTTATGGATCTGTGCACATCATATGTTGTTGAAGCCAAG  
AACAACACCCCAGAAGAGAAGAGTACAATTTGTCTTGAAATATGTGCTTCCCAAAAATCCTCATCTCTTTTC  
CT



>TCONS\_00082067

AGGAAAAGAGATGAGGATTTTTGGGAAGCACATATTTCCAAGACAAATTGTACTCTTCTTCTGTTG  
TTCTTGGCTTCAACAACATATGATGTGCACAGATCCATAAAGAACAACGAAACACCACCTTCTGAAGAGCAA  
ATCCAAGCACTTGAAGATTACATAAACTCTGTTTCGTCGTCCTTCTTAGACTATCGGTCCATATTATGCCACGTT  
TACTGTTATGTACTTATGGCCGGTCCATATTACGCCACGTATCTTGTTATTACCTAATTAATTTATGAAAAGGG  
AT

>TCONS\_00082102

TTGGTTTCAGCACCTCTATATGACAAAACTATAGTAGCAGCTAGCATAAGGTAGTACATAATTTGGATATTC  
ACGCAGCAAGGACAATCTTCTGCAACTCGTTTCATTCTTCTAGTCCAACTAAAGCTTAGACTTCAGTGTCTCCA  
CTCATCAAATGATATCATCACCTTTCCAATTGCTCTCTATCTTTGAGTGCAGTAAAGGCAAGATGGGCCTCTG  
CCAGGCTGAATGTATGAGAAATGTTGATTGTAATCAAACCTTAGACAACCAGGATAGGAGCTCTTTCAGAG  
AATCTCCAAGCACATTAGGTTGATATATCTTATGGCTTCCCCAATAGAGTCCGTGAATCGTCCAGTTCCTCACC  
AAAGCAATGTTTCGCTGGGATGACAGGTACTTCTCCACTTGCAAATCCAATAACCAGAATTTGCGCTCCCCAAT  
TTAATAGCTTCAAGCTATCTTTTGTAAAGCTTCCCGCCGACCGGATCATAACAAGACATCAACCCCTTTGAGCTTT  
CTTGACTTCAGGAAGCCCTTGACACTTTTCGATGACGTTTGCATTGCTCAAGTCTACTACATGATCAACTCCTAA  
AGATTTCAAAAATTGCACCTTTTCATTTCCCCTAGCAACTGCAATAACTGTTGCTCCACAAACCTTCCCAATTT  
GTACCGCTGAGAGCCCAACACCTCCAGCCGCTCCAAGTACCATTAACACCTGATTGGGACGCAGCTGTGCTC  
TATGCACCAGAGCCACATGGGATGTCCCATATGCAACAGGAAGTGCACCCGCTGCCACTAGATCACACCCAT  
CAGGTACTCG

>TCONS\_00082256

ATATTACCAATCTTCACCTAGCAACAGTAACTGTACAACATAAAGTGGATTGGAACCTTTCTTTTCCCTCTTC  
AATAACGGACTCTTGTTGATTTCGGATGAGCCATATCATATGTTGCATGGACACCAACAAGTACGTAGTAAAT  
GAGCATTACAGCACTGCATAGGATGAACCGATAAAATGCTGCATTACCCAGAGAACCTATCAAAAATATATT  
CATCCCAATTGACAATGATGGCAGCCATGGCACGAGAGGTACACCCCAAACCTTTAGGAAATCTTTGTTTTGG  
AAGCAGTGCCATTCTTAAAGTGCCCAACAACCACAAAGCGCCAGTCACAGTATACCCGACCCAACTTTTTTC  
ATCCATACTCCAGAGACATGTTGCCCAATCGATGAACCAATTACAATGGACAAGCACAGAAGAAATTTAGC  
CAAATCGTACTTCGGAGTAACATCCGTAACGTAGTACCGCCTAACGAGTAATGCAACAGCCATAAGCATGAA  
AATGGAAAGTGTACTAAACGAGAACACGCTTGACAAGACATCCAAGCTCGTGAACAAAGCAAGAATGCAGC  
TAGTTATAGTCGTCAAGAGAGTAGCATAAATTGGTGTGCCAGTTTTTGGGTGAACCAGAGCAAACCACGGGG  
GAATCATATGTGCTCTCGCAATCTGAGTTGTGTATCGAGCTTGTCCCATCGACCCAACAAGCATACTCGTAGT  
CATTCCCTTAAGTGACAAAATCCCCACCAATACTTTGCCCAATTCATACCTATGCCCTCAAATGCAACTGAA  
TAGGGCGCATTAACATCCACTTCAGTGAACCTTAACCATCATAGTCAAAGCCAACGCCATCAAACAATAAACC  
ACAGTGATCACAGACATTGAACTAACCAACCCAAGTGGTATATCCCTTGATGGCCTCTTAGTCTCCTCAGCCA  
TATTTGCAACCATATCAAAACCCCATACGACCAGTACACAACCTGCTGCAGCCCTAAATACCCACACAGCTC  
CAAAAGGGAAAAAAGGCACTAAATTTGAACTCTTCCCATGAACAAACCCAACAATTACAATAAACAAGATT  
ACACCAGCACTAACTATAGAACTGACCGAATTCAATATCGACGTCCTCTTTGTCCCGGTCATAGCAATCCCAT  
TTGCAACAGAAAGAATCACAACAGCTAAAGGGTCCAACAAATTAAACCTTCAGCAAAAGAATCAATCTTG  
ATTCTTAAAAAATCAGCATCACTATTAATAATACTAGCAAAATAAGATGTCCAAGATCTTCCTAATCCAGCA  
GCCCCACAATAGCTTCTAATAAAATATTCCCAGCAGCTATAAATGCAACAAAATCACCCAACCTCAACTCTC  
AAAAATGAAAAAGACCCACCAGCTATTGGAATATCAACAGCAAATTCAGTGTAACAGAAAACAGAAAGCA  
AAGCAGAAAGACCAGAAATAGCATATGAAAGGACAATAGCAGGGCCAGCATCAAGTCTAGTTTCTTGACCA  
GTAATGTTGAAAATACCTGAACCAACTACTGAACCAAAACCAAGCCACAGTAGGTCCCACCAAGTGAGGCA

TTGTTTCATTTTCATATTCTGACTGTTTTTTTAACTCAACTAATTCTGTGGTCTCTGTTGAACGGCAAAAAAGGCG  
GTTCTTGAGACGATTTGGGGTTTGAGAAAGGGCAGT

>TCONS\_00082317

CGTCAAAATAAAAAAGAATCAAGCTTTTAGCGTTTTGATGTCATTTATATATACGCTGAATTGCTTCCTGTACA  
ACTATAAGAGCTACAAGCTAGGGGTAATTAATGAGGACGACTCAGGTTGCTTCTCTTGTTGCTTTATGTGATC  
TGCCACATGAGAAATTAAGCTCCAGCTCCAGCATTGTGAAAGAATTCATTCTTCACATGGATAAAGTTATGCGCG  
AAAAAGGGCCAGAACGCCGAGTGAAAGCTAACATCAACTTTCTTCCACCCCAACTGTTGCAAGCCACGTATC  
ATTCCTCTTCCATACTTTTCATGATATTCTAATGTACTCTGCGTGCTTAGTGCAATTTGTGCTGCCTCCTTTGCTT  
TGGCTGCCTCGAGGGGGTAATGAGGTCCTTCACATGAAGCTGGAGGACAATATCCACATCTACTACATGTTT  
GTAGCCATCCAACGATCGCCAAGGGGGCTTGACGAGTTCTGTCTCCCTTCTTATAGATGATGTACGCCAACCG  
ACCATATGATCATAAGAGACATTAGCATATAGAACACGACATTTGAAAGCACCAAGCGCTGATATAAAATTT  
CCGTCATCGCAGTCTGATGCCATCCTTAGCAGCAGAGGTGGTTTAGTAGGTTTGCCATCCGTAAGGAAGAGCT  
GACTACCAGTTTGACCAACAAAAATAGGAGCCATAGGTGCTGCAATTTTCTCCAAGATTGGCAACCCGAAGA  
GAAAAGGAAGCTGATTTTTCCCTCTCACACCCAGATGTGGTGTTGCCAAGGTGATAAAATTGACTGGCTCCAG  
GCCAGCAATCAAACCTTCATTTAAGGAGCCTACTGGTTTGAGGTTTGCAATTAGTTGAAGTGACTGAATCATCG  
GACTGCTCACTACCATTGATGAATAAAGTGCGGCAACTGCATATCTTGCAATCAATCCACCAAGAGAATGA  
GCTAAAAAGGATATCTTCTTTAGGCTTTCTCTTTTCTGCACAACCAGCCTAACTTCATCTGCTAGTCGTTCTCCA  
GCTCCATCAATCCCTGTGAAGGTTTTAGTATACGTATTACATGAACCTGCATATATCAAAAAGCTTCTTCCCAA  
CCGCTCCTCAACTCTGCTTGAACATACGTCCAGTCACCTGGGCTTGCTAAGATACCATGAACAAGGACTAG  
AAGATGCTCAGGTTCTTCTCCATGTCTATCAAGCCTTTCGGTGACACAATACTTCTTCAGTTGTAATCATCG  
CATGGGCTTTATAGCTTTGACTTCTCAAGATGTTGTTTATCCCAGAAAAGCTGAGGAATTTCCAATTGAACCTT  
CGGCGTTGATCAAAGGATGAAGAAGATGAAGAACAAGAAGGAGAAGATGAACAAGAATTGCCAGACAAAG  
AAGGGCGAGGAGAATAATTATGAACTAATGTAGCTGATAACGCCATATATATTGCAACAAAGTCTAGAGAG  
AGGAAAATAGGACCAATTGAAAATCTCTCTTTCTTGCTTTTTCCGTGCAATTCGCTATGCACAGTGCGTTATGT  
CAGCATCAGGAGAGCAACAACACCCACC

>TCONS\_00082365

GAACCCGGGGCTCGCGAGAAGGCTCTCTTTGCAGCGGATCCCTCCTTGAAACGCTTTAAGTCGCATAAACAG  
AGTGTGCGGAACCTTAAAAGGGTGGGAGATGTTCTAGCTATTGTTGTTGTAGCGGGATGTTGTTATGAAATAT  
ATGTGAGAGCTGTTATGCGGGAAGAAGCAAGGAAGAATGAAGAAGGAAGCGCATAATGGCAGATCGTTCTG  
TTTTTGCAATTTTCACTGCCTTTATTCTTTGAAACATGGGGGAAATGGGATAATGAAGGATGGGTATCTCTAA  
GTACATGAACTCGTGTTTTAACTTTTGTTTGGGGTTGGTGGTATGAAAATAAGGTGGTTCCAAACAGTTGAG  
GCTGCATCTCAACGCCAAGAACTTTGCATGCAAATTTTGGTTTTATTGAACTTTATGTTTGAATGCTCTAAAG  
TGTATGTGATGCCTGGTGAGATTTTCTCACCTT

>TCONS\_00082367

AAGGTGAGAAAATCTCACCAGGCATCACATACACTTTAGAGCATTCAAACATAAAGTTCAAATAAAACCAA  
AATTTGCATGCAAAGTTCTTGGCGTTGAGATGCAGCCTCAACTGTTTGAACACCTTATTTTCATACCACCA  
ACCCCAAACAAAAGTTAAAACACGAGTTTCATGTACTTAGAGATACCCATCCTTCATTATCCCATTTCCTCCA  
TGTTTCAAAGAATAAAGGCAGTGAAAATATGCAAAAACAGAACGATCTGCCATTATGCGCTTCTTCTTCATT  
CTTCCTTGCTTCTTCCCGCATAACAGCTCTCACATATATTTTCATAACAACATCCCGCTACAACAACAATAGCTA  
GAACATCTCCACCTTTTAAAGGTTCGCGACACTCTGTTTATGCGACTTAAAGCGTTTCAAGGAGGGATCCGC  
TGCAAAGAGAGCCTTCTCGCGAGCCCCGGGTTT

>TCONS\_00082378

ACCATCTCTTGACTGACAGCTTACCAAGTGGAAATTTCTTGAGACATGAGTCGGCTGCATAGAAACAATGAA  
GTATGGATTCCCCAATTTGGAACATTGTGCATCTATGAGGGTATAGCCTTTTTCTTGCCAAGTATTTGTCATCTC  
AGAAGCTTTTACTTTATAAGCTGCACTATTCAAATTACCTTCCACGTCTCCTATTTCAAGTTTCACATTGTTAGT  
GACCTTCATTTTTGCTTTTTGAGATGCACAAAACAAATCCTCTTCCACGTCTGGCTTTTCAAGCTTCACCCTGAT  
AGGCTCCTT

>TCONS\_00082379

CTTACTTCGTAGTGGATACCTACAAGGTGACACATCCAAACTGGTAGCAGTTTTCTTTTCACTATGTTGATTGG  
TGGTTGTCATCTTAGATGCTGAGGGATTCACTACTGGTAATTTGTTGCAGTGCTCTTCCACATCTCTTTTTTCAA  
TCTTCACATCTTTCAGTTGCTTACTTCGCAGTGGATACCTACACCATGATGCATCCAAACTGGTAGCAGTTTTT  
TTTTCAGTATGTCGATTAGTGGTAGTCATCTTAGATGCTGAGAGATCCACCACTGACACTTCATTGCAGTGC

>TCONS\_00082380

CTTTTTTGCTTTTTGTACTGCACAAAACAAGTCCTCTTCCGTGTCTCGTTTTTCAAGGTTTACCTCTTTCAGTTGC  
TTACGTTCGCAGTGGATACCTACAACATGACGCATCCAAATTGGTAGTAGTTTTCTTTTCACTTTGTTGATTAGC  
GGTTGCCATCTTAGATGCTGAGGGATCCACTACTGGTACTTCATTGCTGTGCTCTTTAAATTTATATGCTTCAG  
CATACACATTCTGTTGCACATCTTGCTTTTCAAGTTT

>TCONS\_00082381

CCCCTATCTTTACAAAATTCTCTGGTGTCTATCTTCACTTGGGCCAGAAGGATATTCAATCTCGGAAGCACT  
TAAATCAAATATGGAGACAGAGAAATGAGAGTTTCCATTATATTGGAAGAGTAAAAAGTAACCACAACCAA  
TTGAATAGTACTCCTTGAAGTGGTCCCAACCCTCCTTCAGCCATGCCATGCCATTAGAGTTTTGCAATTTTACT  
TTCCATATCGCACCACTTGGGACCTCAAGGGACACAAGATCTCGCATGTTGGCCCCATACTTCATTACAAATT  
CATCTGGGATGTGTAATTTAGAGGCATGAGGAAAGAGAATAATCTTGAAGAACTGAGGGGTTATCTCCGCCT  
CATTACCGCTTGTGCGCGTCTCTTTACCATCTCCG

>TCONS\_00082389

AAAAAGAAAAAGCAAAAAAGAAGAAGAAAAACACCATCACTACACATCACACTTTTCTCACATAAGGGCCTC  
TGCTTTTTCTTCTTCATCTTTGATGAGCTCTTTGATTTTGACTTAGCTTCACTCTTCTCAGATCAGTGATTATGCA  
TCTAAGTTGTAACAAAGTGGCTTCAATTTTTGAGTGAAGTTGAAGTTATGATGTTTCGATCTAGCTGAAAGTTA  
AGCTTTTTTCATCTGAATCGAACTCTATGTCTGCTGCTGTAGATCCAGTTGACCCAATTTGGCTGGTTAAT

>TCONS\_00082530

GTAAAACCATTACTTGAATCAATAACTCCGTAACGCTGCAGAATTTGAGCTTCTTATTCTTCAATTTCTCCTTT  
AAAATCTTCATCTTCAATTCCTCCACCTCTTTTGAATTCTCCTCATTCTTGTTTTGGTCAATGATAGCAGAATTG  
AGAGTGGTCTTCTTCAACGATGAGACTAGAATTGCAGCTTTGGCACATTGAATCGCGACTTTTCGATTTGAGAG  
GTTTCAGCTATTTCTCTTTCCTACTGGTGATGTCCTCCATTTTCTCTGTGTTTTCCCGCGCTCTACTGCTTT

>TCONS\_00082639

CTTCATTTGCAAAAGAATAAAAGCCATTAAACATCCTAGATATATAATGGAGGGCAAATCTTGCCATGCTGAA  
AATCTCAGTTATCTGTACTCTTCCGTCAGTGAATTTGGACCTTCAATTTGTTTTGTTTTAGTTTCACATATAAT  
GATATTTATTTGTGCTTGTACCACAATTATGCCTTCCCAATAACAGATTACTTTTTGTTGATACACTAACATGTT  
AGGCCAGTTTTTTGTATGCTTTTTCTTGTTATTGTAAAAATTGCTGTATCAAGGATACATTAGTCACTTCCTTT  
GGTGTGAGAAGGAAACAAGCCAAAGTTTCCAGGTAAAACAATCGGATGTCACAAAGGAAAGAGGTTCCAA  
ATTTTGCAAATACTTTTTATCATCATCAAAATGCGTTACCTGTTGATTTGAAGGTCCTTCTCTCGCAGTAACGC  
TTCGTAATCTGAAGGGAATATACAAGCCCTTGGATACCTTAACTCACTTTCCAACCTTGCTAACTCCCTCTGTA  
AATGCTTCACCAATGCTTTATCTGACATGGCTACGTTCACTTGGGCGTTAGTAGTTACTTCCTTAGCACAACTT  
GCAAATAGTAGAGTATTTCTTGATTGCTCAACATGACTTCGTGCAGGACTCATTGTACAGATGATGGCAGTTC

TACCGTTGCCACTCAATGATGGCTGTAATATCCGGGTTAGCTTTGAATCTCGGAAAGGAATGTGACCAGTCCT  
 ATCCTTGCTGCATTAAGTTATACAACAACCTTGAATTAGTTACAATTGTTCGGCATTGATCAGCGGAGGGTCAGC  
 AAGCTGCGATTTATGTGACAACCTTCTTTAGTCTTGCACCAGCTGACAACGACTGAGATGCCCCGCTCACTTC  
 CAGCCAAATCAACAAAATTCTGTGTTTCAATGGAAAAACATTGAGCAGTTACCTTAGTATAATAGCAACACC  
 AACTATATATCAATTGCTCTTCAGAGATGCATTTTCTTACCACAGTAGCTAAAAGGGTACCCAGGTTGTCCC  
 CCCCTAAGTGCTCACGAGCAGAACTTTCAATTGTCTGCAACAAATTATACTTCAAACCTTCTAGTTGTATTTAA  
 AGGTCAATAGCATGGTAGACAAGAAATTTGAGTTGTTTTACCAGTCTGATGATTGGTGAGATCTGGAGCTTG  
 TTTTATTGAAGGCAGTCTCCCCAATCTGTCTCTGAGCTGCAACATTTAATTGTGAACTCAAGACCATGGTTAAT  
 TAATTATATGCCAAAAAAGCTATTCATTCTGTTACCTTCACAAATAGAAAGTAGCCGAATCACATGGCCCC  
 AGTCCCTCAATATTTCTCTGTGAGTTTCTCAACAACAGTCCCTCTCTGTTGAAATTGATCGGCATGATTTAAG  
 ACGGGAAAAGATATACAAAAACAAGCAGTAACATTTTGTGATCAGTGAAGCAAACCTCTGGATCGTC  
 AAGAAGTCTAAGTGAGCACTATCTTCACTAAGGAGATCTCTGACAGATTCATTGTATATCTCCATAGCAGAA  
 AACTTCAAAATAAAGACTCTCTCTTTGTG

>TCONS\_00082678

TAATATATCATTGAGATTCAGGTGACCCACCAGGAACCAGGATAGCAATATTGTTTCCATTAAGCAGAATCTG  
 ATCAAGTTTTGTTACTCGCTTCCCTTCTGGAGTGATCTCATATTCAGTGACATCTTCAAGAACCATATTAACAT  
 AAACATCAAAGCCTCTAAGGGTACCAACTAGTCTCTTATCCCCCTTCATTATCACCCATATCTTTGACCCAAT  
 GCAACGATCAATCAACTCAGATGGAAGAAGCTGAGAAGGGTTGTTTGAAGACATTGGGAAATTTGCGAAAG  
 GTTTTCTCTTGCTCTTTAG

>TCONS\_00082768

GACAAATGTGCTAGCCACATTTAAGAAAATCAAATGGAAGCTAACAGAGAAGATACTAATCCTCTTCTGATG  
 CAACGCGCTGCTTCTTCCATTTATAAGCAGCTTCCAAGATCTTGAGGTTGGTGGTTTGCCTTCTCTTCTGAGTTTCTTT  
 AGATAATCGATATACTCCTCGTACGCTGTTGGACCATCCTCCATGTCTATTTGCCTTCTCTTCTGAGTTTCTTT  
 GGTAGCTTTGCACGGACTAAGTTAACATCCCCAAGCTCACCAAAACCGCTTTCCATTTTTCAGCCATTCTTCTA  
 AAAGCATTGCTCGTTCTTCTTTCAATTCAGGAGCAGAAGTTCGGTAGTACGTAATGGCCTTTTCAAAAACATC  
 TCTGGCATGCTGCAGGCGCTTCTTCTTCTGTTCAATATCTTCTCAACCTCTGAATCCACAGCCGAGGCCTCAA  
 AATTTCGCATAACTTATCCACACCTTCAAGTGTTTCGTGCGGTTAAGAAGTCTTTCATACAGTGCTCTTGTCTA  
 TCAAATTCACCCTCAAAGATCTCGAAGTCGATGTAAGCCTTCCATAGTAACTCTGGCATATCCAGCGCAGGTT  
 GGTCAATTGCAAGCTCAAAAATAGCCCTGGCTCGCTCCGTTTCATCCAAGGATCTCTCTAACTCAGCGAATTT  
 GCTCCAAGCATAGCAATTTTCTGGTGACCATTCTAAGTACTTCTCATAAAGCTTTCTACAACGGTCTATATTTT  
 CAAGATGCAGCTCTATCTCAATGTACTTCTTAAATATCTTGTCTTTAGGAGCTCTTCCAATCGCTTCTCCAAGT  
 AGCAGCCGTGCTTCCCTTGAGTCTTAACTGCCGGATCTCAAACCTGAGCAGCCAACAACCAAATCTTTGCAAATG  
 AGAACTTCTGATGAGGAATCAGCTTAAGACACTCCCTGTAGACATCTCTGGTCCTTTCCATGTCTTGTGCGTCA  
 AGCTCTTCATATAATGCATAATTAATCCATAAGTAAATGTATCGCTGCCAATACCGCTTCTCTTCAGCAGGAG  
 GAACGTTAGCAATGGCTCTCTCATAAACCTCTCTAATCCTCTCTTTATTCCCTACACTCTCTTCCAACCGAAGA  
 TAATCAAACCACGCGTCATAGTTCCGCGGATTCTTCTTACTTCATCCTCATACTGAAATCTCCTTTTCCCAAC  
 AATAGCATCCTCAATACCTTCCCTATCACCATACTGTTTCTCAAAAGCCACAACTTCTGTACAAATCCTCA  
 GCTCGCCCTTTTCGGAATATGATCAAGTGCAAACTTATAAATGCACCTTGGCCTCTCTGTCTCTTACACTTCTC  
 CTCAAACCTCCGCGAACGCCACAAACAGCTGCTCTGCTTCTCTCGTCCGCCAACTTATCCACGGCCCTCTCA  
 TAACAATTCCTCGCCCTTGCTACCTCGCCATTCTTAACTCAAACCTTCGCAAACCTAATCCATGCACTAACCTT  
 TGGATGACACTGCACGAATCTCTCGAAAATGGCCCTCGCCCTATCCACCTCATTATACCTTAACTCAAACCTA  
 ATGTAACCTTAACCACCCTTGCTGGTCCGGCATCCATGTCATCCACCTCTCAAAAATCTGCCTTGCGCCAGCTA

CATTCCCAAGCATCTCTTCCATGTGAATATACTTGTACCATAACTGATCAACCCTAGGCAAGAGGGTAACAGC  
ACGATCCCACACATTACGAGCATGATTCACGAACCTTATTCTTCATCTCCACGTCAGCATACTTCAACCACATC  
GTATGATCCCTGTAATCGACCTCAAGTGCTCGCTCCCAAACGGAACGAGCACGCTTGAAGTCCTTTTGTGATT  
CTTCCCATTTAGCATATTTACCCACACGCTTTTGTTCAGCGGACTCGGCTAATTAAGCTTTTGAATTCCTTGC  
GCTTGCGGAGGCGGTAATCGGCGAGTTCGGTCGGGTCACTGATTTTTTGTCTCGGCGGTCTGGATTTCGGCCTCT  
TGACGTTCTCTAGCTTCCCGAAGGATTTGCTCGGCGGTGATTTGGATTGGAGCTGGGGTTTTGTCTTCACCCG  
TGTAGGTCTAGGAAGCTTTACCTCTGTTTCTTTTCGAGTCAGGTACCCAGATTGGGGTCTGCATCTCTGTTCC  
CCATG

>TCONS\_00082853

ATCGATGTTTTACCTTACTTAACTAGAGAGCAGATGCTGGAGTGGGAGGCCGGGCTTTCGCCTTTAAAGGTA  
TAAGCTGTGATGTGATAGGCACGAAGTCAAGCAACCTATGAGTAAGTACTCCCGGTCTATACCTTGGCTAAA  
GTATCTTGCCAGGTATGCTAAGCTACCTATCCCTAAAGAGAATAGGCATCTTGTTACGGATAAAACTACGTTT  
AAGAAAGAACGATCATATGATGTCCAGAAAACGCATTAGAAAGCTCTATAGAGGTACGCAGTTACTCCACC  
GATAGGGAAAGGGGAGAGGGATTGCGAAAACCTGAATTACAATAGCTCAAGTTCAGTGAGTTTTAGGTATTGG  
TATTGAGAAGAAGAAGGCTTTTTTTTTTTTTCTTTTTTTTTTGTCCCGAAGTCATTCTCCATTCCAATTTGGAATAG  
CAAGCGTAAGCGCAGGAGTTTTCTTGCTCTCGCTATCGTACCTCAGCCTTTCCCAAGCACTAACTAAGCCTT  
CATCCTCTCCCTATGCTCTTCCTGCGCTGTAGCTTTTCTCAATCCTCTCGCTATCGGTAAAGCAACTATGTACCT  
TTCGGTAGGTACAGTGTCTTTCGCTTCCCTTACTCCACTCTTTTCTCCTTTTAGGGAAAGAAAGAGCTTTGTAA  
AGCGATTCATATCGATTACGTAACGCCCTCTTCCCTGCTAGTATCCCTGTCCCTTAAGGTTAGGTGGGGGAA  
TGGAAGTGAAGAAAGACTGTTGGAGAATATAGGTCTACTTTTTCTGCTGGCTTGTTGAACTGGCTAACCTT  
GCATTGCTTTCAAAGGAATGCCTTTTACTATTGTTACTTCCCTCTCAACTTGCCATAGGACTTGTAATAATTCCC  
ACATCCGATTTCGTAAACAGACAGGCTTGACCCAACCCTCAGACTGTCTTATAATAAGATAGTCATAATAGTCT  
AGTGCTAAAGGCCTAAAAAGAAAATGAGCAAAATCTTCCTCCTTCAGGTGTGGCTTAGCATTAGGAAGTTCT  
TATAGAATGCGCTGTGAAGGAGAAGACAGAAGCACTGACATAGTGAATGTCCGAGGAGTCAATAAGTGCCT  
CGCTTTACAGTAAAGGAAGACGAATCCGCGAAAGGAAAGGTAAGTGAAGCGTATCCGCTTTGGGACCTGA  
AGGATTTTCTGTTCTGACCTTCCCTGAGCACGAGAGGCGTAACGATCTGGGCACTGTCTCGGAGAGAGGCTTGG  
TGAAATAGACATGTCTGTGAAGATGCGGACTACCTCCACCTGGACAGAAAGACCGATTGAAGCTTAACTGTT  
CCCTGGGATTGGCTTTGGGCTTTTCTGCGCAGCTTAAGTGGAGGGCGAAGAAGGCC

>TCONS\_00082854

ATCGATGTTTTACCTTACTTAACTAGAGAGCAGATGCTGGAGTGGGAGGCCGGGCTTTCGCCTTTAAAGGTA  
TAAGCTGTGATGTGATAGGCACGAAGTCAAGCAACCTATGAGTAAGTACTCCCGGTCTATACCTTGGCTAAA  
GTATCTTGCCAGGTATGCTAAGCTACCTATCCCTAAAGAGAATAGGCATCTTGTTACGGATAAAACTACGTTT  
AAGAAAGAACGATCATATGATGTCCAGAAAACGCATTAGAAAGCTCTATAGAGGTACGCAGTTACTCCACC  
GATAGGGAAAGGGGAGAGGGATTGCGAAAACCTGAATTACAATAGCTCAAGTTCAGTGAGTTTTAGGTATTGG  
TATTGAGAAGAAGAAGGCTTTTTTTTTTTTTCTTTTTTTTTTGTCCCGAAGTCATTCTCCATTCCAATTTGGAATAG  
CAAGCGTAAGCGCAGGAGTTTTCTTGCTCTCGCTATCGTACCTCAGCCTTTCCCAAGCACTAACTAAGCCTT  
CATCCTCTCCCTATGCTCTTCCTGCGCTGTAGCTTTTCTCAATCCTCTCGCTATCGGTAAAGCAACTATGTACCT  
TTCGGTAGGTACAGTGTCTTTCGCTTCCCTTACTCCACTCTTTTCTCCTTTTAGGGAAAGAAAGAGCTTTGTAA  
AGCGATTCATATCGATTACGTAACGCCCTCTTCCCTGCTAGTATCCCTGTCCCTTAAGGTTAGGTGGGGGAA  
TGGAAGTGAAGAAAGACTGTTGGAGAATATAGGTCTACTTTTTCTGCTGGCTTGTTGAACTGGCTAACCTT  
GCATTGCTTTCAAAGGAATGCCTTTTACTATTGTTACTTCCCTCTCAACTTGCCATAGGACTTGTAATAATTCCC  
ACATCCGATTTCGTAAACAGACAGGCTTGACCCAACCCTCAGACTGTCTTATAATAAGATAGTCATAATAGTCT

AGTGCTAAAGGCCTAAAAAGAAAATGAGCAAAATCTTCCTCCTTCAGGTGTGGCTTAGCATTAGGAAGTTCT  
TATAGAATGCGCTGTGAAGGAGAAGACAGAAGCACTGACATAGTGAATGTCCGAGGAGTCAATAAGTGCCT  
CGCTTTACAGTAAAGGAAGACGAATCCGCGAAAGGAAAGGTAAGTGAAGCGTATCCGCTTTGGGACCTGA  
AGGATTTTCTGTTCTGACCTTCCTGAGCACGAGAGGGCGTAACGATCTGGGCACTGTCTCGGAGAGAGGCTTGG  
TGAAATAGACATGTCTGTGAAGATGCGGACTACCTCCACCTGGACAGAAAGACCGATTGAAGCTTAAGTGT  
CCCTGGGATTGGCTTTGGGCTTTTCCTGCGCAGCTTAAGTGGAGGGCGAAGAAGGCC

>TCONS\_00082855

ATCGATGTTTTACCTTACTTAACTAGAGAGCAGATGCTGGAGTGGGAGGCCGGGCTTTCGCCTTTAAAGGTA  
TAAGCTGTGATGTGATAGGCACAAAGTCAAGCAACCTATGAGTAAGTACTCCCGGTCTATACCTTGGCTAAA  
GTATCTTGCCAGGTATGCTAAGCTACCTATCCCTAAAGAGAATAGGCATCTTGTTACGGATAAAACTACGTTT  
AAGAAAGAACGATCATATGATGTCCAGAAAACGCATTAGAAAGCTCTATAGAGGTACGCAGTTACTCCACC  
GATAGGGAAAGGGGAGAGGGATTGCGAAAACCTGAATTACAATAGCTCAAGTTCAGTGAGTTTTAGGTATTGG  
TATTGAGAAGAAGAAGGCTTTTTTTTTTTCTTTTTTTTTTGTCGCGAAGTCATTCTCCATTCCAATTTGGAATAG  
CAAGCGTAAGCGCAGGAGTTTTCTTGCTCTCGCTATCGTACCTCAGCCTTTCCCAAGCACTAACTAAGCCTT  
CATCCTCTCCCTATGCTCTTCCTGCGCTGTAGCTTTTCTCAATCCTCTCGCTATCGGTAAAGCAACTATGTACCT  
TTCGGTAGGTACAGTGTCTTTCGCTTCCCTTACTCCACTCTTTTCTCCTTTTAGGGAAAGAAAGAGCTTTGTAA  
AGCGATTCATATCGATTACGTAACGCCCTCTCCCTGCTAGTATCCCTGTCCATTAAAGGTTAGGTGGGGGAA  
TGGAAGTGAAGAAAGACTGTTGGAGAATATAGGTCTACTTTTTCTGCTGGCTTGGTTGAAGTGGCTAACCT  
GCATTGCTTTCAAAGGAATGCCTTTTACTATTGTTACTTCCCTCTCAACTTGCCATAGGACTTGTAATAATCCC  
ACATCCGATTTCGTAAACAGACAGGCTTGACCCAACCCTCAGACTGTCTTATAATAAGATAGTCATAATAGTCT  
AGTGCTAAAGGCCTAAAAAGAAAATGAGCAAAATCTTCCTCCTTCAGGTGTGGCTTAGCATTAGGAAGTTCT  
TATAGAATGCGCTGTGAAGGAGAAGACAGAAGCACTGACATAGTGAATGTCCGAGGAGTCAATAAGTGCCT  
CGCTTTACAGTAAAGGAAGACGAATCCGCGAAAGGAAAGGTAAGTGAAGCGTATCCGCTTTGGGACCTGA  
AGGATTTTCTGTTCTGACCTTCCTGAGCACGAGAGGGCGTAACGATCTGGGCACTGTCTCGGAGAGAGGCTTGG  
TGAAATAGACATGTCTGTGAAGATGCGGACTACCTCCACCTGGACAGAAAGACCGATTGAAGCTTAAGTGT  
CCCTGGGATTGGCTTTGGGCTTTTCCTGCGCAGCTTAAGTGGAGGGCGAAGAAGGCC

>TCONS\_00082888

GCTTGATCATTACATAACTCCCATCTTTCCTCTTATGAGTCTCAGTCCACACTTTGCCTCGATCAACTTCTTTC  
CCCATTTTCTTCATCAAATCCCTTCTTCTAGCCAGACTCATAGCACCAGTATGAGGAAGTGTGTTGTGTC  
TCGAATCCGTTGATTTCTCAAGCAAAGCGCCTTTGTTTCTTCTTTGGACCGATAGTTAACATACAATGCCATT  
GGTCCATGGGAATGCCTTCTGGAGCATTCTTAATGATATCTTCTTTGCTCAATAATGAATCATTGGCCTCATCC  
CATAGTTTAAGCCTGAATTCCTTCCACTTTTTGTTAAG

>TCONS\_00082915

ATGGCATGTTCAAGATTCACACTTGCTTCTTCTTAACACGGTATGGGTATTTTTGGTATATGCTTATGCTAGTCA  
TAACCAGTGGAAGTGCCACAAGGCAGTATGGCGAAGGAGGTTTTCCATCAAAGATGTATTGGAGCAGAGCA  
GTGACAAGAAGCGCAGACACAATGATAAATCCCTTCTTACACCACCGGCATACGAAGTCACAAGACCCAC  
AAGAATTCCACCAACCGCATTTAAATAACAGGGATCAAAGTTAATGCAGTCCACCCGTAGAAGAATCCGT  
GCTGTCAATAG

>TCONS\_00082976

CCTGCAAGGCCAGGCCGTAACCCCCATTTGCATCATGTTCAAAATATAGTAGCTTGAATTTGCTTTGGGCAGC  
TGAAGTAACTCTTACTACAATCCCTGCCTCTGCTTGTTCACTAATTGTTACACCAAAAAAATGAGCATTTT  
GCTTTTCTACCTTTCCACTGACTGAAGTGCCAATTGGAAGGGGGCGGACTGTGACAGTTCCATTCAAAGCTTC

TTCAAGAACATTAGCAGAAATAGTTGTTTTGATAGGGACACCCAACTTGCTAAACAATGCTGCGAACATTGT  
GTTGACAGTTCCAAGGTTGGACAAATCAATTTCCATATCCATTCTTCAGCTTCAATAGCCTCAAAGCCGGCC  
ATATCATA

>TCONS\_00082985

CTGTGCTAGAATTATCATTGACTTGATAAGAATAGGCACCTATCTTTGACTTGTCAAGCTCAGATGAAATATC  
ATCATCGTCCAAATTC AATGTCTCCGTTTTAGTTTGTCTGGCCATGGCTGTAGAACTCTCGAAGATGGAGAC  
CTTTCTTTGAGTATAAGTGCAATTGTTGATACAGTTTTTCCCAAGTCCCTGATCGTCAGCAAGAATCCCACCACA  
ACAGGGTACACCAGCTTTTTCC

>TCONS\_00083034

AAAGGTTTATTGTTTGAGGATCGAGGCCATGAGCAGATCGTTGGATACTCAGATGCTGATTGGGCAGGATCA  
CCTTCTGATAGACGTTCTACTTCTGGATATTGTGTCTTAGTAGGAGGAAATTTGGTATCTTGCAAGAGCAAGA  
AACAGAATGTGGTTGCTCGGTCTAGTGCAGAAGCAGAATATCGAGCAATGGCTATGGCGAC

>TCONS\_00083043

CTGCAACCCATCATTCCAGTCTCCTCAAGAATGTCCAAGGCATACTTCCGCTGTGAAATAACAATACCCGAGC  
TAGACTGAGCGACCTCAATACCTAGAAAATACTTCAGTCTGCCAGATCCTTAGTTTTGGAAGTGCTGAAAGA  
GATGTTGCTTCAGATTAGTAATACCATCCTGATCGTTGCCAGTAATAACAATATCATCAACATAAACCACCAG  
ATAAATACACAGATTCGGAGCAGAATGCTGATAAAACACAGAGTGATCAGCCTCACTACGAGTCATGCCGA  
ACTCCTGAATAATTATGCTGAACCTACCAAACCAGGCTCGAGGGGACTGTTTCAAACCATATAGTGACCTGTG  
CAATCTGCATACACAACCACTAAATCCCCCTGAGCAACAAAACCAGGTGGTTGCTCCATATAAACTTCCTCG  
TCAAGATCACCATGGAGAAAAGCATTCTTAATGTCTAACTGATAAAGAGGCCAATGACGTACAGCAGCCATG  
GACAAAAAAGACGAACAGATGCTACTTTAGCCACGGGAGAGAAAGTATCACTATAATCAAGCCCCAAAAATC  
TGAGTATATCCTTTTGCAACAAGACGAGCCTTAAGCCGATCAACCTGGCCATCCGGGGCCGACTTTGACTGCAT  
AAACCCAACGACAACCAACAGTAGACTTACCTGCAGGAAGAGGAACAAGCTCCCAAGTACCACTCGCATGT  
AAAGCAGACATCTC

>TCONS\_00083045

AGGCTCGAGGAGACTGCTTTAGACCATAAAGTGACCGGCGCAAGCGACATACAAGGCCACGAGACTCCCCC  
TGAGCAACAAACTCAGGTGGTTGCTCCATATAAACTTCATCCTCAAGGTCACCGTGTAACAAAAACATTCTTAA  
TGTCCAGCTGATAGAGGGGCCAATGGCGAACAACAGCCATGGATAGAAAAAGGCGAACTGATGCTATCTTA  
GC

>TCONS\_00083046

GCCATAGCCATTGCTCGATATTCTGCTTCTGCACTAGACCGAGCAACCACATTCTGTTTCTTGCTCTTGCAAGA  
TACCAAATTTCTCCTACTAAGACACAATATCCAGAAGTAGAACGTCTATCAGAAGGTGATCCTGCCCAATC  
AGCATCTGAGTATCCAACGATCTGCTCATGGCCTCGATCCTCAAACAATAAACCTT

>TCONS\_00083047

GACATAAGGTAGCGCTGGAGGTCAGGAGAATAGCATCGATACCCCTTTTGCGTTCTCGAGAAACCAAGAAAT  
ACGCACTTAAGAGCACGGGGAGCTAACTTATCTGTTCTTGGAGTAAGGTTATGGACAAAACAAGTGCTTCCA  
AAGACACGGGGTGGAAGAGAGAACAAAGGTAAGTGGGGAAACATAACAGAGAATGGAACCTTGTTCTGGA  
TAGCTGAAGATGGCATAACGATTAATAAGATAGCAAGATGTAAGAACTGCATCCCCCAAAAATGCAACGGA  
GCATGAGATTGTATGAGTAGGGTACGAGCAGTTTCAATAAGATGTCTATTCTTTCTTTACGCT

>TCONS\_00083048

TACCTCAGAAATATCTAAGTGATTACCTGGACCTGTGAAGTATCATTGGGTTTCAAAGAAGGTAACATCAGC  
GGACATAAGGTAGCGCTGGAGGTCAGGAGAATAGCATCGATACCCCTTTTGCGTTCTCGAGAAACCAAGAA

ATACGCACTTAAGAGCACGGGGAGCTAACTTATCTGTTCTCTGGAGTAAGGTTATGGACAAAACAAGTGCTTC  
CAAAGACACGGGGTGGAAAGAGAGAACAAGGTAAGTGGGGAAACATAACAGAGAATGGAACCTTGGTTCTG  
GATAGCTGAAGATGGCATAACGATTAATAAGATAGCAAGATGTAAGAACTGCATCCCCCAAAAATGCAACG  
GAGCATGAGATTGTATGAGTAGGGTACGAGCAGTTTCAATAAGATGTCTATTCTTTCTTTTCAGCT

>TCONS\_00083049

TCGTCAAGATCACCATGGAGAAAAGCATTCTTAATGTCTAACTGATAAAGAGGCCAATGACGTACAGCAGCC  
ATGGACAAAAAAGACGAACAGATGCTACTTTAGCCACGGGAGAGAAAGTATCACTATAATCAAGCCCCAAA  
ATCTGAGTATATCCTTTTGCAACAAGACGAGCCTTAAGCCGATCAACCTGGCCATCCGGGCCGACTTTGACTG  
CATAAACCCAACGACAACCAACAGTAGACTTACCTGCAGGAAGAGGAACAAGCTCCCAAGTACCACTCGCA  
TGTAAGCAGACATCTCGTCAATCATAGCCTGTCGCCATCCAGGATGAGA

>TCONS\_00083050

CTGCAACCCATCATTCCAGTCTCCTCAAGAATGTCCAAGGCATACTTCCGCTGTGAAATAACAATACCCGAGC  
TAGACTGAGCGACCTCAATACCTAGAAAATACTTCAGTCTGCCAGATCCTTAGTTTGGAAGTGCTGAAAGA  
GATGTTGCTTCAGATTAGTAATACCATCCTGATCGTTGCCAGTAATAACAATATCATCAACATAAACCACCAG  
ATAAATACACAGATTCGGAGCAGAATGCTGATAAAACACAGAGTGATCAGCCTCACTACGAGTCATGCCGA  
ACTCCTGAATAATTATGCTGAACTTACCAAACCAGGCTCGAGGGGACTGTTTCAAACCATATAGTGACCTGTG  
CAATCTGCATACACAACCACTAACTCCCCCTGAGCAACAAAACCAGGTGGTTGCTCCATATAAACTTCCTC  
GTCAAGATCACCATGGAGAAAAGCATTCTTAATGTCTAACTGATAAAGAGGCCAATGACGTACAGCAGCCAT  
GGACAAAAAAGACGAACAGATGCTACTTTAGCCACGGGAGAGAAAGTATCACTATAATCAAGCCCCAAA

>TCONS\_00083051

TACATATCTAACACTCCCCCTCAAGCCGGTGCATACACATCATATGTACCGAGCTTGTTACACATGTAACTAA  
TACGAGAACCAGTAAGAGGCTTAGTGAAAATATCTGCTAGTTGATCATTGACTTTACAACTTTGTGACAAT  
ATCTCCTGAAAGTATTTTTCTCTGACAAAGTGACAGTCGATCTCAATGTGTTTAGTCCTCTCATGGAACACCG  
GATTTGACGCAATATGAAGAGCAGCTTGTTATCACAACCTAGTTCCATCCTGCTGATTTCTCCGAACCTTAA  
CTCCTTGAGCAACTGCTTGACCTAACTAACTCACACGTTGCCATAGCCATGGCCCGATATTCCGCTTCGGCG  
CTAGATCGAGCAACTACATTTTGTTCCTTCTTCCACGAGACCAAATTACCTCCTACTAGAACACAATATCC  
AGATGTAGATCGTCTATCAGAAGGTGATCCTGCGAATCAACATCTGTGTACCCAACAATCTGCTCGTGGCCTC  
GATCCTCGAATAGCAATCCTTTGCCTGGAGCTGACTTTATATACCGAAGAATACGAACAACCTACATCCCAGTG  
ACTATCACAAGGAGAATCCATAAACTGACTTACAACACTCA

>TCONS\_00083091

AAAGGATGTTTGAATTATTTGTGCTAGGGTGTACTGGTGTGTGATGTTCTTCATGGAGCCAATTTCTTCTTCC  
ATGGTCTCTCTCATCATATGGCCATTCGTTCTCTCAGCTTCTTAGGATTTGTTGGTTGGTAAAGAAATGTCGAG  
AATGATAATGATGATCGATCAGCTAAAGGAAGCTTGACGAACCGCCATGCTTTTTGTAAATTATA

>TCONS\_00083141

CAGATGACTATCAATCTGTATACTTGTTTTGCAGCTCGAAAGATACTCAAATTGCAGGGCACACAAACGATTT  
AGATACACAGCATAAGCTATATATTTACCAAAGTCAACTAGTTAGACAGCGCAAATTAAGGCTAAACACAG  
ACTCTTTAACACGTTCCAACAAACAAAGTCTCCTCACACTATTAATTAATATATGTACCAACATTAACATCAG  
TTGGTTACTTATATTGCCATAGCTTGCTCCATGCCTTTCCCGTGAATTCCGAAAAATACCTTCCCAGCATTGTC  
CAAGCTACTCGTGTCAATCGCAATTACCCCGAACATTGCCCTGAAAGCACCACAAACCACCGCAGGAGCTGA  
CGAATTTGTCTTGTGTGAAACCCTGACTATCTTCTGCAAACCTAAGCGCTCTCCATCAGCAGCACAAGATGTT  
ACCACATTGGACGAAAGCTCCGCAATAGCCCGGTTGAGATCCTTGGGGACATATCGATATTCTTTCTAAGCA  
ATTGCAGAGAAACCGAACCCTCAATTGCCTTCTACCCAAAACGCTCAAAGCTCTGTTGTTCTCTCCTGAGTA



TGATGCGTGCGTCATGGCACGTCGTAGTAATTCCACATCCTGAAATGTGTACTGGATTTGATTTTGAAGGGTTT  
GGAGAGCGATTGAGAA

>TCONS\_00083260

TGCAATGAAATCCTCAAAAAAATTCTCTGCCTCCTCATTCAATTGTTTTGATGTCCTGTTTCTGTCATTGCTTCT  
CTTCCTACGTGGTTGTTTCTGCCCCAACAGCAGAATTTTTTGTATCAGGAAGTTCTTTGACAATCTGCTGATCCCT  
ACCTCTGTGGTCTTCTTGCTCCAATTTTGTTACATGATTCTTTCTGGCCACATGACCTGACTTGGC

>TCONS\_00083261

CACAAAGTAAAAGACCACCTGAACTAATTCTATTTCTGTTCTCTGTACCTTTCAAACAATAGCTCTTCACTTCGT  
TGAAGTCTGTTATATTCAGCCATATCAAATCCTGAACTTTGGCAACTTTCAAGTTCTCCGGATACGTCTCCACC  
ATCTTCAACTGTATAGATTGTTCTATTCTTCGGTTGACTATGCACAATTGCTGGGCTCCAACCTCCATGGCTGC  
TGACGGAATAACTACTATCATTCTGAGGGGAGGTGACGTCCTGTCTTGCATCACATATTGACGTTTTCTACTA  
ACAGGAGTTTGCTCTTCATTCTTGGGAGTGAAAGAACTATCATTGCTTGTCTCCCACTGCAACCAAGGCAAGA  
T

>TCONS\_00083267

CTGCGATTCTGTTGAAGGCTTGTTTTATAGGTGTGAGCTCTGTGAATTCGATGTCCACCCTCTCTGTACTCAGTT  
GCCTGAAACATTGCGCCATGTCCTGCATCAGGCCCATCCTTTAAGGCTTCTAGGCTCGTCCGAATCAGGAACC  
TGTGCTGTTTGTAGAGGAGCATGTAACCGTTCTTCGTGGCGTTACAGGTGTCAACTATGTGAATTCGATATTCA  
TATGGGTTGTCTTGTGGTACAATGTGAAAAGAAAACAACATGGCT

>TCONS\_00083268

AGCCATGTTGTTTTCTTTTCACATTGTACCACAAGACAACCCATATGAATATCGAATTCACATAGTTGACACCT  
GTAACGCCACGAAGAACGGTTACATGCTCCTCTACAAACAGCACAGGTTCTGATTCCGGACGAGCCTAGAAG  
CCTTAAAGGATGGGCCTGATGCAGGACATGGCGCAATGTTTCAGGCAACTGAGTACAGAGAGGGTGGACAT  
CGAATTCACA

>TCONS\_00083278

TGAAGATGTCCTAAACCAATTATTTTCATCTGCATGGGTGCAAAACAACAGAGATCGTCATACCGGAGCTTCGT  
GAGCTGCGCAGAGCCCATACTGTTAGTTTTGGATCTGAATCACTATGCTTATTGAATCCTGATTGCGAGGATG  
GGTATATCTATTTTCCATTCAAGCTATTAGTACAACCTGCTTGCAATCTTGTAGTTTGGACTAATATAACTTTTT  
TCATTTTATGTACGAAAGGAGTAAGATTGACTAATGATACTCGCACAAATCTAGCACTCTTCAGATCATTTC  
AACATCAGATTATGTTTCTGTCCAGCGCCTTAGTTAAAAAATAAGTTACTGAATTACTTAATACATGTTGAAA  
CAATTTGTTCAGTT

>TCONS\_00083312

GTTTCAGACAACCTGTATTTGACCATTCCAAATGAGTATTTTTCGCAAAGATAAATTTGAAGCACAACTCATGTT  
TCATGAGTTAGTTGAGATTATGTAAAGTAAATCCAACCTCTGAGTTCTTCTGAAGGTTGATTGGAGATTCCGAT  
GGCTTTTTCTCTCCAGAACTTGCTGCGTCAAAATTGATGGTATGTTTTCTGTATCTTCTCCTTTTGAGGTTT

>TCONS\_00083377

AGATCCAACATTACCTTTTCCATTTCAGCAGCATATTGTTTGGGGATGATCTCCATCTTCTGTTTATCATCATCCA  
TCACAGCATCCAAAGCCTGTTTGGCCATACTTTTGCAGTTGACAAACCACTGGGGCTTTACAAGAGGTTCCAC  
TACATCATTGCTTCTTGAACAAATCCCAAGGCGCATCTCGTTATCCTTGACATCCCTTTTCTTTAAAGCTTCA  
GCCACAGCGAAACGAGCTTTGAAACGAGGCATTCTTCAAAGTCTGCACCCCCGTTGCTATTTATTTTCCCAT  
CGTCAGTAAAAATATTTATGAATTCAAGTTTGTGACGCTGTCCAAACTCAAATCATTGGATCATCGGCTGG  
AGTTATCTTAACAGCGCCAGTCCCAAAGTTTCATATCTACAAGTATTTTCATCACAAACTATTGGAAGCTTTCTTC

CATTGAATGGATGAATAGCAAATTTCCCATGAAGGTGGCAGTATCTTTTGTCTTCAGGATGTATAGCAATAGC  
AGTATC

>TCONS\_00083394

CTTGAGGGGCTTCCACCATGAGATGGAGGGGAGGGATAGTAACCACCACCTCCATGGCCTCCTGAAGGAGG  
CGATGGAGTAGGGTTGTGGTGATGCCCACCACTAGGGGCGGGGTACCACAGTTTGCAGGTGGTGTTCCTCCA  
TGGCTACTGCTTCCATGCGACGGCGTTCCATGAGAAGGTGATGTTCCATGGCCACCTCCTGAATGTGATGGAG  
ATTTGTGAGAACCTGTTGGGGGA

>TCONS\_00083421

TTGACCGTGCAGGTCCAGGTATTGATACCATAGCGCGTGAGTTGTCCGCGTAGCACGTGAGTTGACCGTGCGG  
ATCCAGGTATTGATATGATGGCACGTGAGTTGTCCGTGCTTAGCGCTTGGGTTTTGGGAGCCCCTCCGGAGTCT  
GTACACACCCCCAGTGAGCGCAGAGTGTTGAGAGTATTGAGTGTTGAGTGTTGAGTGCT

>TCONS\_00083422

GCACTCAACACTCAACACTCAATACTCTCAACACTCTGCGCTCACTGGGGGTGTGTACAGACTCCGGAGGGG  
CTCCCAAACCCAAGCGCTAAGCACGGACAACCTCACGTGCCATCATATCAATACCTGGATCCGCACGGTCAA  
CTCACGTGCTACGCGGACAACCTCACGCGCTATGGTATCAATACCTGGACCTGCACGGTCA

>TCONS\_00083489

CAGTCCAAGCTGACTATCTTCTCGTTGTTGGAGTTTGCTTGACTCTCAGCGTCGCAAATATTGTTGGTTTTACTA  
GATGTTGCAAAGATGCTAAGAAGCAGCTCCAAGCATTTGCAACCCAGACTCTTACTTCTCGATTATCCTCTAC  
TCTACAGTCGGTATTTAGTGTTGTTTGACCTATTTATACGCAGCAAGCTAGTTATGGAAAGAACTGTTTCGTCA  
TTTTCCACCACTACGAACAATCATGTATTGACATGGTCTTTTCTCAGACTTCTCCTTCACTGAGGCTTGATATG  
TAGAATATGGACGAACTTGAAAAACATTTTTGTTCTCTTCAGTTTTACGAATTCAATTGCTTCATTGTTTCCTG  
TTGAGACTGTTTTTAGCTC

>TCONS\_00083492

CAGCAAGCACCCCGTCTCATTCTCCATAATTTTCTTCCTTTAGATCTCTGCAAGGAGTTAGAGTTTATACACA  
AGAGCTGTTGTACGGTAGGGTACAGGCCCAATGTGTTGTCTACAACACTATCTCATCTTATTGCCACTAACTCT  
GCCATTTTCATCTTGCCCATCATTTCCATTTCGAGAGAGGTTAAGGGAGAAAGCAGAGGAGTATTTGGGTGCC  
AGTATGAGTTGTTTGTGAATTCAGTGGTCTAATCAGGTTCAAACCTCCCACTTCT

>TCONS\_00083495

AGTTTTGTTGCATGTGCTTGTTGACACAATTTTTATATTATAAATGGTGTTCGTCTTATTTTAGGTTCTTTTGTCT  
CATATTAATTAGGCGGTTTATAGCGATATACTTTCCGTGGAATCCCGCAAATTTTCTTATTGGTGTAATCGAT  
AACCAAATCGATAAGCCCCCAAATCGATAAATCGAAATCGAAAAAATCGAAACCTTATTGAAACGATAAC  
GATAAGCATATGTACAAATCGATAAGGGTCAAATCGAATCGATAAATCGAATGCACACCCCTA

>TCONS\_00083562

TGGGTTTGAGATTTAGCTTTACAAATAGAAAAAGGAGGCAACCGCAGCAGAGCTTCCTCTGTCTCAATCGGG  
TCTGATCTCAGTATTGGGTCTTGAAGAAGTGGCTTTGTGTCTATCTTTAGCGGGTCTGAAAGGGGGTTTTGTTAC  
CTTCTTCACTTCATTTTCGCCGTTTCATGTTACTGATATGGATGCTTTTCGTTGAATCCTCGCTTGGCTTCATC

>TCONS\_00083685

CAAAATGAGGATCATACCTCTGCAAAGCTTTGACGAAGAGCTAGAAGTTTTCTTCTTCACTCCCAACGAATA  
CCAACTTTTGCTTTATTGTTTCTGAAGCAGAATTTTCTACCAATAATGACTCGAACAGCATCATGCATTATT  
GTACGCGCTCTGTCTTCAACTATATCAGGTAACGTAGCACTGAACAACGACCGAAGAATTGAAGGATTGTG  
CACGCATTACACCACAAAATCAACCTGCTCTAGCAAGCCAGGCTCAAAAAGCTTATCAGATTCATCTAAGACA  
AGAAATTCAACCCTACTTAAATCAAGCTTTCCTTTGCGGATAGCAAACCTGTAAGCGCAATGGTGTGAGATG

AGTATATCACATCGCAATTTAGAAAAGTCTCCACTTTTAGCGAGCTTTTATGTCATCAACCTGATGTAGAACTT  
CTTCCCTTTAGCCAACTTTCTGCATTCTCTTGTAGTCTGAGCAGCTAACTCTTTGTAGGGGAAATAATTACAG  
CTCGGACACCATCATTTGAAGTATCCTTGAGTTTACAAGTATTGGAAGACAAAAGCAAATGTTTTCCAGA  
ACCGGTAGGTGCACAAGCAAAGCATTCCCGTCCAGATAAGAGGACTGGAATAGCCTGTCTTTGGATTGGTGT  
TGGTTCTTTAAATCCCAGTTCTGCCAGGTTGCGTAATAGATATAATCGACATTTATATCTGTATAACCATATAC  
AAACAGAACATTGGTAAAAGAGA

>TCONS\_00083701

CCCAGCCAATCACATAGAATAGACCATGAAGGCTAAAAAGAGCCATAGTAGTATGTCCCAGCCAAACATGA  
TATCGAGTGGCATGTTCAAATGGGATATCTATAGCTCGAAGAAGAACTGAACCCCGTGCAACAGGTATAAAC  
AAAAATGCTAAGCAGGTTAATCCAATGAATCCAAAACGACGGCCTGTTAGCTCCAGCAACATACCGCTGAA  
GAGATTACAACAGAGGATATTAGACAATGACGCAGAACCTTTTCTCTTTCATGTCTTGTACATGAAACGAGG  
ATAAGCGGTCAACACTCCGTATACTGTACATAATAACAGCCCAGATGATGTACACTGAGAAGAGTACAACCTC  
CAATCATTTCTGCAGCTGTAACAACCCCAAATGGTCCATCCACC

>TCONS\_00083727

AGACTAAAAGCAACAATAATAACATCAAGATCAAAAAATAAATAAATAGATAGCAGAATATCTTTCAATGA  
CGAAATTCGAGTAAATTCTAAAACACAACAGAACAAATTCCAGGCTTGACTACAGCTCCAGACTTGAGGAA  
CACTTTACATTTAGATCAAAACACTCCCCAATGTGATGGATAGGAGCATAGAGAGTTCATGATTCCGCAGCA  
GCAGAATGCATACAGCAGAACCATTTTTTTGATTGAGGCTTTCCAAGAGTTGCTCCATGCTTATTATATGCAG  
GGTCACCCTTTGGTGGTGAGTTTGTATTGCCTCCGCTTCTCTTCTCATTTCGAGCTTTGTTAAAGATGACTGTGA  
AACCTCAGCAGAAGCTGGGTCAATTGACATCCCACTCTCAAATTTTGAAGTGGACGACCTTTATCCGCCAT  
GAGTTTTAAGTTTTTGGACAGAGAAAGAGAAAAACAAACAGAGAAAATTCCTTCGTACAACCTTTTGTTTTG  
TGAATTTTGTAATTGGATTTATTGTTTATTATTGGAAGAGAAGGGATAATTTTCTTACTTTTTCTCTCTATCT  
CTCTCTGCAAATGAAATGGAAGGTTTCAGAGAGAGAAGGAGCCAAGGAGGTGAAGAGAGAGAGAGATG

>TCONS\_00083913

CTTCATTGTCACCACTGTTTAAGAACCTTCAGAAGATTTCTAAAGTAGGATAGCTGAACTCTTCAAGGTTCTG  
GAACAATTTCAAGGAACGAAACATTAAGAGTAGATCACCTGTTGCATTCCAGTCATGATAGCAGCCAGTTGT  
TCTTGAATCCTCTTGGCTACTTCTACACTGATCCGGTTGTCTACTTCCGCATTCACGTGCTCAAGTTGCTCTTCC  
AACTTCCTTTGCAACTCTTGTTCCATGTTACTTTTTAAGTCGGCAGCCATTTGTTACGTTCTTCTTGCAACTTTC  
GACTCA

>TCONS\_00083919

TTAGAAACAAGCATCCAAGACACAGCAACAACACAAGGCAGCACAACAGCCTTTCCAGAAGCCATCACCTC  
TGGATTGAGTAGTAAGTGAACAGAGGAATCACCTTCAACATCTCTGGTTGGATAACCAGCCGGTGGCGGTG  
GAGCCACTAAAGCACCACCCTGTGGTTGCTGCTGTTGAGTGTACGCAGTTGCTTGAGCCTGGTTTTGGTCGTA  
GCTATTCATGTTGAAAAGATGAAGATAAGAACAAGCTAAAGATCAATGAAGATATGATATTATATTCTTC

>TCONS\_00083983

CTTAGAGGCGTTCAGTCATAATCCAGCGCACGGTAGCTTCGCGCCACTGGCTTTTCAACCAAGCGCGATGACC  
AATTGTGCGAATCAACGGTTCCTCTCGTACTAGGTTGAATTACTATTGCGACACTGCATCGGTAGGGTAAAAC  
TAACCTGTCTCACGACGGTCTAAACCCAGCTCACGTTCCCTATTGGTGGGTGAACAATCCAACACTTGGTGAA  
TTCTGCTTCACAATGATAGGAAGAGCCGACATCGAAGGATCAAAAAGCAACGTCGCTATGAACGCTTGGCTG  
CCACAAGCCAGTTATCCCTGTGGTAACTTTTCTGACACCTCTAGCTTCGAATTCGAAGAGCCGACATCTAAG  
GATCAAAAAGCAACGTCGCTATGAACGCTTGGCTGCCACAAGCCAGTTATCCGTGTGGT

>TCONS\_00083984

CTTAGAGGCGTTCAGTCATAATCCAGCGCACGGTAGCTTCGCGCCACTGGCTTTTCAACCAAGCGCGATGACC  
AATTGTGCGAATCAACGGTTCCTCTCGTACTAGGTTGAATTACTATTGCGGACACTGCATCGGTAGGGTAAAAC  
TAACCTGTCTCACGACGGTCTAAACCCAGCTCACGTTCCCTATTGGTGGGTGAACAATCCAACACTTGGTGAA  
TTCTGCTTCACAATGATAGGAAGAGCCGACATCGAAGGATCAAAAAGCAACGTCGCTATGAACGCTTGGCTG  
CCACAAGCCAGTTATCCCTGTGGTAACTTTTCTGACACCTCTAGCTTCGAATTTTGAAGGTCTAAAGGATCGTT  
AGGCCACGCTTTCACGGTTCGTATTTCGTATTGGAAATCAGAATCTAACGAGCTTTTACCCTTCTGTTCCACACG  
AGATTTCTGTTCTCGTTGAGCTCATCTTAGGACACCTGCGTTATCTTTTAACAGATTTTCCGCCCCAGCCAAAC  
TCCCCACCTGACAATGTCTTCCGCCG

>TCONS\_00083989

TTTGCAGCGACCGCCGCGCCCTCCTACTCATCGGGGCTAGCACTTGCCCCGACGGCCGGGTGTAGGTCGCGC  
GCTTAAGCGCCATCCATTTTCGGGGCTAGTTGATTTCGGCAGGTGAGTTGTTACACACTCCTTAGCGGATTTTGA  
CTTCCATGACCACCGTCTGTCTTAATCGACCAACACCCTTTGTGGGATCTAGGTTAGCGCGCAGTTTGGC  
ACCGTAACCCGGCTTCCGGTTCATCCCGCATCGCCAGTTCTGCTTACCAAAAATGGCCCACTTGGAGCTAGGT  
ATGCTCACACTCGAACCCTTCTCAGAAGATCAAGGTCGGTCGGCGGTGCACCC

>TCONS\_00083994

CCGGCGGAAGACATTGTCAGGTGGGGAGTTTGGCTGGGGCGGAAAATCTGTTAAAAGATAACGCAGGTGTCC  
TAAGATGAGCTCAACGAGAACAGAAATCTCGTGTGGAACAGAAGGGTAAAAGCTCGTTAGATTCTGATTTCC  
AATACGAATACGAACCGTGAAAGCGTGGCCTAACGATCCTTTAGACCTTCGAAATTCGAAGCTAGAGGTGTC  
AGAAAAGTTACCACAGGGATAACTGGCTTGTGGCAGCCAAGCGTTCATAGCGACGTTGCTTTTTGATCCTTCG  
ATGTCGGCTCTTCTATCATTGTGAAGCAGAATTCACCAAGTGTGGATTGTTACCCACCAATAGGGAACGT  
GAGCTGGGTTTAGACCGTCGTGAGACAGGTAGTTTTACCCTACCGATGCAGTGTCGCAATAGTAATTCAACC  
TAGTACGAGAGGAACCGTTGATTTCGCACAATTGGTCATCGCGCTTGGTTGAAAAGCCAGTGGCGCGAAGCTA  
CCGTGCGCTGGATTATGACTGAACGCCTCTAAGTCAG

>TCONS\_00083995

CCGGCGGAAGACATTGTCAGGTGGGGAGTTTGGCTGGGGCGGAAAATCTGTTAAAAGATAACGCAGGTGTCC  
TAAGATGAGCTCAACAAGAACAGAAATCTTGTGTGGAACAGAAGGGTAAAAGCTCGTTAGATTCTGATTTCC  
AGTACGAATACGAACCGTGAAAGCGTAGCCTAACGATCCTTTAGACCTTCGAAATTCGAAGCTAGAGGTGTC  
AGAAAAGTTACCACAGGGATAACTGGCTTGTGGCAGCCAAGCGTTCATAGCGACGTTGCTTTTTGATCCTTCG  
ATGTCGGCTCTTCTATCATTGTGAAGCAGAATTCACCAAGTGTGGATTGTTACCCACCAATAGGGAACGT  
GAGCTGGGTTTAGACCGTCGTGAGACAGGTAGTTTTACCCTACCGATGCAGTGTCGCAATAGTAATTCAACC  
TAGTACGAGAGGAACCGTTGATTTCGCACAATTGGTCATCGCGCTTGGTTGAAAAGCCAGTGGCGCGAAGCTA  
CCGTGCGCTGGATTATGACTGAACGCCTCTAAGTCAG

>TCONS\_00084046

CTGCTGTATGTGAACTAGTTAAATCGCACATTTAATTCGAATCAAGGAACGGAATGCATTGAACATAGAAGA  
AAGGACATGAAAGCAAAATAATTTCTTTTTTCCCAAGACGCTACATGTGGAAGGTTGATGGTTAAGATTATTCT  
TCTCAAATTGTATCTTTCAGTCTTCAGCGATGTTGCTGAATGCGTAAGTTAGTGTTCATATCTATGTTTTGTTG  
TTCTCTTAGTGTGGCA

>TCONS\_00084104

ATCTCTTAACATTAAAAAAGCTTAGAAGTAGAATAAAACATTGTGTATAAAACAAATTCTCTCTAGTGTTGTAG  
CTTTGGCAGTGATCTTGAATATGGCGAATCAGCAGCAAGCATCGAGTAGGCCATGGATACTCGAAGTCGTAC  
CTCTTCTAGTAGTCATACTAATCGCTGCTCATGTGCTCGCTTTGGTGTACTGGATTTATCGGCTAGCAACTGAG  
AAACAGCCTCAGAGGAGAAAAAAGCACTAGCAATATGTAGATTAGATTGAATTTTCATTTTCGCTTCAGCTTTT

AGGAAAATGCAAGGGAATCATTCTATACGGTTCAGAAGCAAGCTTTACACTCAAGGCTTTGGTGATTGGTCA  
GCCCTCTTTGCCTAAGCATACACTGTCCTCTTTTTCTCCATGAACTTGTGTGCAATTATGCTGGAAAAGTTTGG  
GATTTGTTACATGTTAATGGATCGCGTTAATCGTTTGCCATTGTTGAGAACTTCTTCATTCTTCTATTAACGCC  
AGCGCT

>TCONS\_00084105

TCTTAACATTAATAAGCTTAGAAGTAGAATAAAACATTGTGTATAAAACAAATTCTCTCTAGTGTTGTAGCTT  
TGGCAGTGATCTTGAATATGGCGAATCAGCAGCAAGCATCGAGTAGGCCATGGATACTCGAAGTCGTACCTC  
TTCTAGTAGTCATACTAATCGCTGCTCATGTGCTCGCTTTGGTGTACTGGATTTATCGGCTAGCAACTGAGAAA  
CAGCCTCAGAGGAGAAAAAGCACTAGCAATATGTAGATTAGATTGAATTTTCATTTCCGCTTCAGCTTTTAGG  
AAAATGCAAGTAGGGAATCATTCTATACGGTTCAGAAGCAAGCTTTACACTCAAGGCTTTGGTGATTGGTCA  
GCCCTCTTTGCCTAAGCATACACTGTCCTCTTTTTCTCCATGAACTTGTGTGCAATTATGCTGGAAAAGTTTGG  
GATTTGTTACATGTTAATGGATCGCGTTAATCGTTTGCCATTGTTGAGAACTTCTTCATTCTTCTATTAACGCC  
AGCGCT

>TCONS\_00084106

CCCAAACCTTTCCAGCATAATTGCACACAAGTTCATGGAGAAAAAGAGGACAGTGTATGCTTAGGCAAAGA  
GGGCTGACCAATCACCAAAGCCTTGAGTGTAAGCTTGCTTCTGAACCGTATAGAATGATTCCCTACTTGCAT  
TTTCCTAAAAGCTGAAGCGAAATGAAAATTCAATCTAATCTACATATTGCTAGTGCTTTTTTCTCCTCTGAGGC  
TGTTTCTCAGTTGCTAGCCGATAAATCCAGTACACCAAAGCGAGCACATGAGCAGCGATTAGTATGACTACT  
AGAAGAGGTACGACTTCGAGTATCCATGGCCTACTCGATGCTTGCTGCTGATTGCGCCATATTCAAGATCAC

>TCONS\_00084107

GTAACAAATCCCAAACCTTTCCAGCATAATTGCACACAAGTTCATGGAGAAAAAGAGGACAGTGTATGCTTA  
GGCAAAGAGGGGCTGACCAATCACCAAAGCCTTGAGTGTAAGCTTGCTTCTGAACCGTATAGAATGATTCCC  
TTGCATTTTCCTAAAAGCTGAAGCGAAATGAAAATTCAATCTAATCTACATATTGCTAGTGCTTTTTTCTCCTC  
TGAGGCTGTTTCTCAGTTGCTAGCCGATAAATCCAGTACACCAAAGCGAGCACATGAGCAGCGATTAGTATG  
ACTACTAGAAGAGGTACGACTTCGAGTATCCATGGCCTACTCGATGCTTGCTGCTGATTGCGCCATATTCAAGA  
TCAC

>TCONS\_00084133

TGAAAAATATGGCTTTCATTTCTTTACATACTTTTTTTGAATACATTTATGTTTGTTATTTATTTCTCTGGTATAA  
TTTTTAGCGTGCAAGTAAAGAGAACACGAGGAACCATCTAAGTCTGAAATGTTTATTGCAACTCGTACAAA  
ACAAGGGAAGCAAGTTCATGAAGATGCTCAAATTGCAATATCTGAACTTCAGAACCGTCAAAACGCTGGGG  
AATCATCGAATGAAGCATTT

>TCONS\_00084226

ATACGAAACACTTCACAAAACCTTTAAAATCAACATACTATAAAATTAGATCCATACCCTTAAACGATCGGAG  
AGGACGGAAGGGGTGATGAGCTTATACTTGGGAGCTTCAGAGAGGAGCTTGTCGTAAGTGGCCTTATCGAAC  
AAAACCATGTTGTTACCTTCTCCTTTTGCTTTCCCTTGCTCCACTTCTTCTTCTGCTTTCCACCACCAGACT  
TGGCGGGCTTGACGACGGAGGAGGAGCTGCCTTCTCGGAGCCATTGATGGCGGAACTGCGTAAGGGGGTA  
GGGGGAGGGGGAG

>TCONS\_00084243

GAGAGCTAACATTCTTCATTGTCTCTTGTATAAACAGGTATTTCCCATTTCTTGGTATTCTTTTTAGGATCATCG  
CTGAGGCTGAGATCAGTATCATCTTCTTTCATTGTTTTAATAAATGTTTTTGCTCCCATCATAATAAGCCTTTCT  
ATCATGAAGAGCTGGTAATTGTTCTCAATCAATGGATCCAAAATGCTGCTGTAATTTGATGAATAGGCCAGCT  
TGTACCTCACAGCCAGAGGAGAAAAAGAAGCCTGGTGTCTCTCATTAGAAGCAATAAAAAGGGTTCGCCCAT

GCCGGACCCATTTTGCTATTCTGCAAAGAATGAACTCTGGACGTGTATCCCTGTCCAAATGAGGGTGCAAACCT  
TCGATCAACCCCCAAACCTGTCTTCCTTGCTTCAGAACATCACCTCTCCGAACATGCATAGCATCATA

>TCONS\_00084244

AATACGGCAGAAGAATGGAGCTGTGATTTTTCCTATCCTTGCATTCTGCAAACCAAGAAAGTGGGCTTGCAGT  
TCGATTGATAAGCAAAATGTTTGAGTACAACTTTTTTCTTTGAGATCAGTCCTGCTAACTCCTTCAACGTGGG  
CAACCCCTCTAGAACCTAATTTTCATGCTTGTGTCAGGACATGATGCCACATTTCCGAGTTGTCCAAAATTAC  
AGGTACAGTGTGAGAGATGAGATCCACATCATACAAAGAATCCATAGCACACGAACCTATCTCCCCACCT

>TCONS\_00084288

GGGTTACGAATGCATCAGCTAAATTCCAGATTCCCTCCAATAGCTTGAGGATACTGTGTTTCAGGCGCGCTGAT  
TGACGGAAGAATAACACGATTCATGGGTGGTCTAGGTCTTGTTCAGCTGCCTCAGGCTCTGCAGTTGTTTCCTT  
CCTGCATAACTGGAATATCTGCCCTTCTTCTCACTGCAGACACTCGCTCCTTCCATATTCTTCCATCATTTCAGTA  
TTGAGGGTTCTGGTATTGGACATTGAATTGGTCGATCATTGTGTAGAGGGCTCAGTTGGGTGTTCAACTGGTTTG  
AACTCAACTGCAATTTCAATACCATGAGGTGTGATAGAGGGAGCTCCAGCTATTGTAGCAGCACCGGTTGTTT  
CTGTATTT

>TCONS\_00084290

GCTAGAAATTCCAGATGGTGCTGTGATTGCAAACAAGGATATCAATGGACCTGAGGATATATAGAGGAGCTA  
CTGGTGCTAAATAGATTTAGCGAGTCTGCAGCAAGTACATTTTGTGTACTGAATGTAATTTTGCCTCTAAAT  
TTAAATAAGTGAACAGTTTTGATTGTTTGCTACAGAAATCTTCATTGTATACATTATGGAACCTCGATATAGTTT  
GTTTCTTCATATTTCTGTAGCCATATTCTTCTAATGTCCGTACTGTTGG

>TCONS\_00084295

CAGAAATATGAAGAAACAACTATATCGAGTTCATAATGTATACAATGAAGATTTCTGTAGCAAACAATCA  
AACTGTTCACTTATTTAAATTTAGAGGCAAAATTACATTCAGTACAAACAAAATGTACTTGCTGCAGACTCG  
CTAAATCTATTTAGCACCAGTAGCTCCTCTATATATCCTCAGGTCCATTGATATCCTTGTTTGCAATCACAGCA  
CCATCTGGAATTTCTAGC

>TCONS\_00084532

TTTGTTTCTGGTTCCTTAGGTTGGTAAACTGCTTCTAAACACTCTTTAGCTCTGTGAACCTTTGACTGAAGGTAA  
AAGCTCCCATTTTTCAGATTTTCGCTCAAACAAGTTGTCATACTTCTGCACAATTTCTTCCCATGATGAATTCTC  
AGTGACGCCAAGAATCTGCCTTGCTCTCCCTCCGTCATGGTTTTACTAGCTCTTTTAATATTCTGCACTGCTTC  
TTGAGCAACACCATTTTTTCGAGGCATCTGCCATCA

>TCONS\_00084567

ACTAGATATAGCATGTAGGAATATAGTTCTTCACACCACTAACAATTTCTCATTCTTGCTGATGAAACATAC  
CAGTTCTTTTGGTTCAACAGATATTTTCCTCGCTCCCTTGCTTAGATCTCTCAATGTTCCCTTGTTTGCCCACTTT  
AGTCCACATGCATTGCAGAGTGTCTTGGTCCATCTGGCCACGACGCATTGCTGGCGTACAATTTTCACTCA  
CACCACAATGGTGACACTTTACAGGAACAGTTTCAGAATGCTGAGTGCCATCTCCTTCAAGGCTACTCTTGGC  
TGAGTCACAGCTAGAAGATCAAGAACTTGCTTTCAAAGATGCAAATTGACCATTCTTCCG

>TCONS\_00084735

GGAAAGTTAAATTAAGACAGGAATTAGGCAAAAATATCTTCATTACAAAAGAATGGAAGTAGACCATTCTC  
ATCATTACACGCCCATTCAGGTAAAGTAATAAAACATATTCGCCATGTCCAGAAATTTGTATCAAAAGT  
ACAATACAGAAACAAGGTACAGAGCATGAAAAAGCATTTATGAAGTTGTAAGTGCAGTAGCACCAGAAGTC  
ACCGATGGCGGTTTGAGAATGATTTCCACATTGTCATGAACCCCTTGAGGAGGAGCTCGCCATCGTATGTAA  
GTATTTTCTTTTCTTTGAGCTCTTAATGTCCCAACGAGCGCCTCAAAGATGTTGGCACATCTATCATCATGA  
AACAGCACACCGAATGTTACCTTGTAAGAACCATCATCTTTGGCTATGCCGAGTCGCTTGATCTCTTCTTTGAG

TCGTTCAACCTCTTCTTCAACGTTTCATGGTTCCTGTCAATGGAGTTGAACAGATCTATCTTATTCTCACATTTTT  
CTCATTCTTATATACTCCC

>TCONS\_00084932

CGGCATATAATCACACTAGCTTCAAGAATTTTAGGGTTCTTTGACAACCACTCAAAATCCTGCTCCGCAACAG  
ACTTCATACCCAAATACGATGTTGTCGCAAGGTAGTAATATGTAGTAGTTGCCAGTGCATTGCTTAGGTATTC  
AGAAACGGGTGGCTTATATCCTTCAATAAACCATGTTGACTCGACATTATAATTTCTTACTACTTCTTTTCATTCT  
TTCAATTGCATGGCAGACAATATGAGATCTTCCAGCACTAGACA

>TCONS\_00084940

TGATGTCTGCCACACGTACTATTCTCTGTGGATAAGATTCTTGCAGTTCGCCTCGACATCCTCGACATCATAA  
GGTTCAACACCCCATGCTTCAGTTTCTTCTTCTTTAATAGTTTGGACACCACAGAACAAGTATCAGGTCCAC  
GTGCAAACTTTGCGCATGCTGTCACCATATGCCTTCTTTAAGTAAGGAATAGCCAGCTGAAGCTCCGAAGTG  
CAGGTAAATTCACCTTCAAGCCTGCTGAGTGCTGAACCTCCAGATGTACCT

>TCONS\_00084944

TATAGCAGATATGATTGACTCTGTTTCCTGAATCAATTTATCTAAAGGTAGCACTATGTGCACTTTCAGCAGA  
ACAGACAAGTACCTCTTCTTTGTTCTTCTTGCCTCCAGTGAAGAGTTTGTACCCACTATAGAACAGCAAGCCC  
CAACCGGACAAAGATACAATCACAAAATGTTCTTCCATTGGGCAGGATTCATCGGCTCTGACCAGCAA  
TTGACCTTAGGAGGCCCCGTGATGATCAGCTGCACCAGCAAGGCCACGGCGCTGAACGAGAGAAGTGGCTGA  
GGAGGGGAAGCGAGTGAAGGCTGCTGCTCGACGAGCCGCCATTGTCAACGAAGTAGCCATGGCTTTGTTTGT  
TCTGAGATCGAAGAGAGAAAGAAAATGAAATTAGCTGGGGATGTAGGC

>TCONS\_00084946

TGATAGGTGTCATGTCCTTAGAGCATTCTCTGGGTCTGAACTACATCTTGGGTATCTGAAGGTTGGTGTCTTC  
ACCAGTAATCCCGACACGAGCACAATCCGTCTTTTAAATGATGAAACCTCTTAGCATCTCGCATAATAATTTT  
CCGACCAACAAGCCTCGAAGCAATCTTCAATGCATTATGGCAATCACCACAGACACGCAGATTCTTTATTATT  
CGGATTGGTGATCGTGCAGAGCTACTCATAAGACCTTGAGCAAAAGCAAGTCTCTCGCTGTGAGCCATTA  
GCGTCCTCTTTAGTTTCTTGGTCTACGTCATGTAACACAACTTAATCTCTGGTATATAACCGTCCTCCTTCATT  
AGCTGCTTTAAACCCCTAAGCAATTCATATATCTTCTCATGGTCGGGATGTGATCTATCTCCTGCTCGATATTC  
ATGGACTCTGCTTCTAGCCTCAAGAAGACTTTGAGCAGATTTTTTCTTTTCTTTGTCTTAGCAATATCTGATGC  
TTTTACAGCTAAAAAACCTGCCTTTGACTGTTTCATCCAAACGAGATGGATCTAGGAGTTCAACAATCTCAGCA  
CAACGATCCCCAAGCTCCAAGTTCCCATGAATTCTACAGAGATTCATCATGGTTTCCCATACTTCAATACTTG  
GCTCTATAGGCATTTTTTCAATGAACTCTATCGCTTCAATAAGATATCCTGTACTTCCAACATATCTACCACT  
CCCACATAATGCTCCATGGAGTGAACAATACCATAATCTTTACTCATTGATTCAAAGTGCAACATGCCTTCAA  
CTATATCACCTACAACACTACAAGCATGAAAGACACCCAGATACATTTGGCCATCAGGTTTCATCCCCGTTTT  
CTTGAATTCTGCAAATAATTCTATTGCGTCTTCTCCAAGACCATTCCTAGCAAGCCAAGTAATCATCGTGTCCC  
AAGAAGTCAGATTACGCTGAGGCATTTTTTGAAACACCGAAAAGGCATCATTATGGAGCCACATTTGCCAT  
ACATTTCAAGAATCTTATTGTACGTTTTGACGTCAAGATGAGGATGAGATCTCACAAGGTGCTCATGAACTGA  
TTTAGCCTCCTCAAGGGATTTATCCTCACCACAGACATCCATTAGTGTTATATATCGAGACAAATTGACTGTG  
ACATGTTGCTGCTCCAACAAATGCAAACTTCAACTGCCTCCTTCACTTTGCCTTCTTTACAAAAGTTATCGAG  
CTCGTCAATTGAGCCTTTTTTAATGCTGCTATCAGCAGAATCGATTGACTGTTCAACAGGTGTTGAACTTCTCA  
TTTCTTGATTACCTACTATTCCATTCTGAGATTGATAAGAAGCTTGATGTCCAGTACTAGAAGGGTTAAAGCCG  
CTTACATTCTGCTGATATTGCCCCATCATCTCCCTTGAGTAACCACTTGAATTCGTATGCCTTTCCATATCATAC  
GCACTTGCACTTTGTGGATACGTTTCAGAATTTCTGCTTGAACATTCCTTACATTTCCAGGGATATA

>TCONS\_00085140

CTATAGTTGAATATTGAGTTGGAAGCCATTTATAGACATCAAGAACGGACCAACATTCCAGTGCGAAGATGG  
ATCATCAAAATATTGTAGCAGATGTACAACAGACTGTATTTCTCAAATCATCAAAAACACTGGTCGATCCTT  
TTCGCTGACTGAACTTCTCTAGTATAATCAATCTGCCAACACAAGCACTAATCCATCTTGAGACATTTTATCT  
AGCAGCCACGTA

>TCONS\_00085141

TATCACTTATCAGGAATTACGTGGCTGCTAGATAAAATGTCTCAAGATGGATTAGTGCTTGTGTTGGCAGATT  
GATTATACTAGAGAAGTTTCAGTCAGGTGTTATTGCTTATCATGCAATGGGAAATTAGAAACGGCGGTAACA  
ACTTATTTTCGTGCTTCTTCAGCGAAAAGGATCGACCAGTGTTTTTGATGATTTGAGGAAATACAGTCTGTTGT  
ACATCTGCTACAATATTTTGATGATCCATCTTCGCACTGGAATGTTGGTCCGTTCTTGATGTCTATAAATGGCTT  
CCAACTCAATATTCAACTATAGTGTAATAATCTGGTTGTTAGCCAATGCTACTGGGTTTTTCATGGATGCTGCAG  
A

>TCONS\_00085177

ACTGTCTCTTAAAAGTAAGATCACTGACTATATGTATATGTATCAACATTCTTACCAACTTCACCTTTACTGTG  
ACTAACTTCTACTTTCTTTGTCTCCTTTATTAATTAGGAATTGTATTGGCATTGAACCCACTTAGCTCCAAAG  
TTGTGGGGATTTGAACAATCAGAACATAAATAATAACTTTTCATTGGTTGTGGTTAGCATCGTGCTTAACGTATT  
TGGACCAACTAAAGGTTTTGTGATTTTGTGATTTTGTAGTCAATGGACAAGCTTGGCTTGTGAGCCCTTGAAAG  
TTCTAGCTTCTTCGACTGCCACCTCAGTCTTTGTCCATCTCTTTCACCCGCTTCAGTAGTAGATTGTGTGAAGAC  
AGAAACCCAGAAAAAGCTCAAGAAAATCTACAGCTGCTACCACCCCAATGGATTGTTCAAATTTCTTATCA  
GAATTTCTGCTTCTACCA

>TCONS\_00085320

GTCAAGTCTGTCTGTCCCAGCTAACAGCAATATCTTTGGAACAGGAGATGACAAAACTTTTCTGAAAGGCCT  
TCGTACCATTCTCTCCAATACTGCTCAGTTTCTTCCAGTCTTGCTCTATGCGTGTAACATTTTTTTGATTCATCAT  
ATTTCAATGTGTTGGGGATTGATACACGAGCAGAGTCAATATTTCTCAAAGAGCCTGATTTGACACTCCATT  
AATATCGTCTGAGTCCGGGATCTGAATATCATCTTCTCGATCGAAATAATCTGACCAGTCTAAAGGTGCATAT  
TTCTG

>TCONS\_00085321

AACAGCAATATCTTTGGAACAGGAGATGACAAAACTTTTCTGAAAGGCCTTCGTACCATTCTCTCCAATACT  
GCTCAGTTTCTTCCAGTCTTGCTCTATGCGTGTAACATTTTTTTGATTCATCATATTTCAATGTGTTGGGGATTG  
ATACACGAGCAGAGTCAATATTTCTCAAAGAGCCTGATTTGACACTCCATTCAATCGCTTTTTTCAGGGGTAGA  
GAAATGCTGCATTCTGTTTCGACAGAATCTTCTGCATATGAATCAACGATGCCATTGC

>TCONS\_00085342

GAGAAAACGAAATTTTCAAAGATAAACTAATGAGCTGTATCATCATATATGCTTGCAGGCCAAATATAATT  
CATGGTAAACATGATTTAACCATAGAGGACTGCTTAGGTAAGAGGGAACCAAGTGCAAAGTCAGATTAGTG  
GAGCATTGGGAGGACAACTGTACATACTGACAACAGACATCACCAATAAACAATTGCCTGTAAGGATTACA  
GAGCAACTGGAGTTGCTGTATTCCTAATGATATGGAGGCGTTGATTGAACACACAACCTCCGACTCATCTTCTT  
CATCATCGTCGTCATCTGCATCTACCCAGTTACTAGGATGGTGTGAGAAGCATGACCTTTCAAATCTGTCATG  
CCTTGAGGTTCTTCCAAATGATTTCTGTCCTCAGAAGGGAAGTCATTATGTATATCAGACATATCTCTTCCAGC  
AGCTCCAGCTTCAGAAATGTGTATTGCACCAATTCGGTGAATTTCCCTTAGTTCAATATCATTTTCAATTTCTAC  
CCCCTCCAGGTTCAGCACCATTACCACCTTTTGTTCTGCTTCTGAAAGATCGGACCAAAATCCTGGTCTGATCA  
GATGGAAGCCCAGAAATCCCTTTTGATCTCTCCTGGGGTGGGGCCTGTCTTCCATCATTAGCCTCACCGTGGG  
AAGTGCCAGCAACTTGTGGATTTTTCAGAGGAGCCAGCAGTATTGAGCTGGGACATAAGCATGGTTGCAAGTA  
CCAAGGTGGCATCAAAAGTTGAGATCGAGCCATCATCTAAACCAAATTTTGGCGTCATTAGAA



>TCONS\_00085424

CAATACACTCAACACTCTGTGCTCACTGGGGGTGTGTACAGACTCTGGAGGGGCTCCCAAAGCCCAAGCGCT  
AAGCACAGACAACTCACGTGCCATCATATCAATACCTGGATCCGCACGGTCAACTCACGTGCTACGCGGACA  
ACTCACGCGCTATGGTATCAATACCTGGACCCGCACTGTCAACTCACGTGCTACGCGGACAACTCACGCGCT  
ATGGTATTAATA

>TCONS\_00085425

GGCCTGGTTGTGAGGATATTAATACCATAGCGCGTGAGTTGTCCGCGTAGCACGTGAGTTGACAGTGCGGGTC  
CAGGTATTGATACCATAGCGCGTGAGTTGTCCGCGTAGCACGTGAGTTGACCGTGCGGATCCAGGTATTGATA  
TGATGGCACGTGAGTTGTCTGTGCTTAGCGCTTGGGCTTTGGGAGCCCCCTCCAGAGTCTGTACACACCCCCAG  
TGAGCACAGAGTGTTGAGTGTATTTATACCATAGCGCGTGAGTTGTCCGCGTAGCACGTGAGTTGACCGTGCG  
GATCCAG

>TCONS\_00085435

ACGTGTACATGTCATGGTATACATGATAGCTCCCACTGCACTAGCGTATGGGATCCTACTCATGCGTTCTCTCT  
CTTCAGATGTTTTAGGACAATCCTCCCTACTGAGAGTAATTCCAGTGCCTATCGGTAGATAGCCTCTTTTGGAA  
TTATCCATGTTATACCTCTTTAAGATAGTATCAATGTACAAAGACTGGGAAAGTCCAAGCAGCTTCCTAGATC  
TATCTCTATAGATCTTTATTCCTAATATATAAGCTGC

>TCONS\_00085451

GCAAACCAAGAAAGATCAAACGAAGCTTACGCAGGTCTCGGAACACGGAAATAAGGGCTAGTGTTCAAAAC  
GACCTATCGGGTCGTCACACTACGACTTACTGCAGTGAGATGCTGTATTGCACCTTTTGCAGTAGGAAAATTA  
CTTGTCACGTCTCGGACGGATTTGGTTGGAGCAAAGAGGTCTCCAACAAGCGCTTTATTGGCACATAGAAG  
CTCGCGTTGTACTGGATCTTCAAGAATTCATTAAGTTCGGTAAGCATATGAAATCTATTTTTGGGACCTGTGACA  
TTCTAATCTACGAAGGCTCACATAAA

>TCONS\_00085471

CTTGTTTTGTATTTCTTTCTTTTGTGGGTCAATTATTTTCAATCCTTGTGCGAGACTAGTGTTGGATGGATATACAT  
GTGCAGTGCTATGGAATTTGGTGTTATCACTTGGATCTTAACTTTCTCTTTATACTTGCAGGATAGCGAAAT  
GCATCGTGCGGAAGCCATTGTATCTAAATGAGGAACGCTATGCTGCCTTAACTCATATGGTGGCTTCTCATGGA  
CTGGATCGTAGTTCAAAGGTGCTTCGTCAGCCGAATATTGGCACTTTTTTTCATGCTTTAGTTGCACTGTTTCGT  
AGGTAACTAGGTCCCAGGAATTAGTCAAAGATGGTAAAAAGTTATCAGCTGTCTGGTTCTGAGTTTTGACTC  
AGACACAGCATGTCCAATGTTCTGCGGTCTGCTACTGTCTAATATACAGATTATCGAGGTTAGTCTATAATTT  
GACGT

>TCONS\_00085472

CTTGTTTTGTATTTCTTTCTTTTGTGGGTCAATTATTTTCAATCCTTGTGCGAGACTAGTGTTGGATGGATATACAT  
GTGCAGTGCTATGGAATTTGGTGTTATCACTTGGATCTTAACTTTCTCTTTATACTTGCAGGATAGCGAAAT  
GCATCGTGCGGAAGCCATTGTATCTAAATGAGGAACGCTATGCTGCCTTAACTCATATGGTGGCTTCTCATGGA  
CTGGATCGTAGTTCAAAGGTGCTTCGTCAGACGAATATTGGCACTTTTTTTCATGCTTTAGTTGCACTGTTTCGT  
AAGGTCTGGTAAAGGTCGTTTCATGATCGCCATATTCGGTATATTTGTCTTTACTTACTGACAGGTAGTTTATCT  
TTATT

>TCONS\_00085557

TTGTCAATTTGCTTTGACTGTGCGGCTGCAAGAGTATTATTATTTTAGTCGTGATAATGGAGCCTAGTGCAGATA  
TTAACCTTGATACAGACATCTGGAGTCTGAATGATCAAGATAGCAATGCAATTATATTGCCAGACAAGAAAA  
AGAAGAAGAAGACAGAAAAGGAACAAGTATCGAAAAAGCTTAAACGAAGAATAACATTAAGTTAAGTCA  
ATCTCAGAAAAAAA

>TCONS\_00085558

GAGATTGACTTAACCTTAATGTTATTCTTCGTTTTAAGCTTTTTTCGATACTTGTTCCTTTTCTGTCTTCTTCTTTT  
TTCTTGTCTGGCAATATAATTGCATTGCTATCTTGATCATTGAGACTCCAGATGTCTGTATCAAGGTTAATATCT  
GCACTAGGCTCCATTATCACGACTAAAATAATAATACTCTTGCAGCCGACAGTCAAAGCAAATTGACAA

>TCONS\_00085813

TGTAGCATAGTGTCCAAATCCATGGTAATATTTCCCAGCTTCAAGCCGTGTCTACTCAAGACAATAATAGCCA  
TAAGATGCCTAAATACTCATACAACAAGGAGGCCGCCAAGGCCACCGGTAAAACTAAACCACCACAAAAC  
AACAAATTACAAAGACAAGAAAGAGACTCTGATGACAGAGGAGAACAGTAACAGAAAGCTCCAAGACAATA  
ATTCCATGGTCAAATCAAAGTAGGAATCTTGTTTCTTAAAGCTAATAAGTCATTCGTACTTA

>TCONS\_00085815

CTTATTAGCTTTAAGAAACAAGATTCCTAGTTTGATTTGACCATGGAATTATTGTCTTGAGCTTTCTGTTACTG  
TTCTCCTCTGTCATCAGAGTCTCTTTCTTGCTTTGTAATTGTTGTTTTGTGGTGGTTTAGTTTTACCGGTGGCCT  
TGGCGGCCTCCTTGTTGTATGAGTATTTAGGCATCTTATGGCTATTATTGTCTTGAGTAGACACGGCTTGAAGC  
TGGGAAATATTACCATGGATTTGGACACTA

>TCONS\_00085870

GAAGCATGACTGCTGAGCAAATCTTGATTTTTGTCACTACTCGAGGTTTTATCTACAAATATAATAGACATAG  
TTGCAACAATAAAGCTATTCTGTTTAACCAGAAAATAATGAACATTGGGATATACCTCAATTGCTGTAATAAC  
AAAACATTGAACGTAACCTTCCATTTTCTAATATAACTTGACTGAGCTTTGGAGACTGAACTCTATCATACATG  
GACTGTTTCATTTGGGAAACAAGTCAATGAGGTCCAAGCAGGAGAACGAAATGATCTTTGCCTTACCTCCCA  
GCATATTGGTAATCTCCCAAGCATTTTGTGACAGCCTCATTTGGCCTTCTGAGATTCCCTTTCTCCTCTTTTTTCT  
TCTCCCTTTCCACATATTCCTTCAACAGCTCTTTAGCCTGAACCAGCTTGGAGAGCAAATTGCGATAAACATC  
AAGGTCCCTATCCACACTTTTCTTGTTTATATTGAGTGAAGCACAAAGCTGTCATGCCAATTTACAAAGTCAAC  
AATATATTCACCTCCAAGTCCGTTGCAGTTTCATGAACATAAACATCTAAAGGGGG

>TCONS\_00085964

TTGGACGACAAATTAAGTGAGGCAAAGTATAGGAAAATCAAGTGAGACCATCTGGTGCTGACAAGCAGTGG  
ATAAAAGTTTTTTGAGTTAATAAAAATAATAGTTAAAAGAAGTTTTTCATGGAAATGTAAGCAAAATCCCACC  
TGTCTCTTCGCATGCTTTTGAAGACAGTTCGGGCTTGTTCCACCATTCTGAGATTGCAAATGCATCTAGCAAG  
ATGTTGTAAGATTTCTGTGTTGGCCTGACACCAGCATCAAGCATTTCTTCAAAAACAGCGAGTGCCTCCTCTT  
CTCTTCTAGCCTTTCCATATGCACTAATGAGCAGGGCGTAGCTAACGACATCAGGTGCAAGACCAGCTCTTTG  
CATCTGATCATAAATGTTTCGCGACCTCCTTGAGTTCGTCTCAAACGACATCAAACGTTGTAAGTAACCGTA  
TTTTGTGGAATTCCTCGCTCGGTCATCAAAGAAAACAGCTGACGAGCTTTCTCATACTTTCCAGACTTCTTATA  
CATATAGATCATCATGTGGAACATTTTCTGGTCTG

>TCONS\_00085994

TCACAGCCGTTGATCATAATTACAGGTCTAGATGTGTGTGTATATATACACAAACACACACATTTAATCCTGT  
ATTACACTAAACCTCTTTGAAAAAGCCTTGCCCTCTTTCTCTTACCAAGATTTAGCTTTTTCTCTGCCAATCCCT  
TTTATTGCTGCTTACTAGGCGCTTGCTAGTCCGTGTGCTTCCTCTTCAGTCGACCATTCTTCAGTAAATGGGCT  
GCTTTCATTCTAAGGTTAAAAGAAGTTACGTGGACACGAAGATCCTGTAGTCCTTGCGTCCCAAACAGCTTT  
TAGTGTTAGCGAAGTAGAAGCATTGTTGAGCTGTTCAAGAGTATCAGTAGTTCGGTAATTGACGATGGGCTA  
ATAAGCAAGGTAATTCTGCTAAACTGGTAAATGTTTTCTTGTTTGCTTTTAGTGTAAGGTTGTGATTCCTG

>TCONS\_00085995

TCACAGCCGTTGATCATAATTACAGGTCTAGATGTGTGTGTATATATACACAAACACACACATTTAATCCTGT  
ATTACACTAAACCTCTTTGAAAAAGCCTTGCCCTCTTTCTCTTACCAAGATTTAGCTTTTTCTCTGCCAATCCCT

TTTATTGTGAAGCTGCTTACTAGGCGCTTGTCTAGTCCGTGTGCTTCCTCTTCAGTCGACCATTCTTCAGTAAAT  
GGGCTGCTTTCATTCTAAGGTTAAAAAGAAGTTACGTGGACACGAAGATCCTGTAGTCCTTGCGTCCCAAACA  
GCTTTTAGTGTTAGCGAAGTAGAAGCATTGTTTGAGCTGTTCAAGAGTATCAGTAGTTCGGTAATTGACGATG  
GGCTAATAAGCAAGGTAATTCTGCTAAACTGGTAAATGTTTTCTTGTTTGCTTTTAGTGTAAGGTTGTGATTCC  
TG

>TCONS\_00085996

TCACAGCCGTTGATCATAATTACAGGTCTAGATGTGTGTGTATATATACACAAACACACACATTTAATCCTGT  
ATTACACTAAACCTCTTTGAAAAAGCCTTGCCCTCTTTCTCTTACCAAGATTTAGCTTTTTCTCTGCCAATCCCT  
TTTATTGGTTAAGATGGTTTTGATGATATATTGTAGTGAAGCTGCTTACTAGGCGCTTGTCTAGTCCGTGTGCTT  
CCTCTTCAGTCGACCATTCTTCAGTAAATGGGCTGCTTTCATTCTAAGGTTAAAAAGAAGTTACGTGGACACG  
AAGATCCTGTAGTCCTTGCGTCCCAAACAGCTTTTAGTGTTAGCGAAGTAGAAGCATTGTTTGAGCTGTTCAA  
GAGTATCAGTAGTTCGGTAATTGACGATGGGCTAATAAGCAAGGTAATTCTGCTAAACTGGTAAATGTTTTCT  
TGTTTGCTTTTAGTGTAAGGTTGTGATTCTG

>TCONS\_00086022

CAAAGCTAATTGCATAATATGTAATAGGTAATCCGTTGACAGACGTTAAAAGGAGGATATTATACTAACC  
AGCAGTCAGAGGAAAGTAGTCAAACAGATCTGTGAAAGTCTTCCACACATTGGCATTACCATACTTCCGTAG  
GCATTCATCATAAAACCCATAAACCTGAGTAATCTGGCGACTCTCATGATTACCCCTTAGGATTGTAATTCGC  
TGGGGATAGCGCACTTTGAGAGCCACCAAAAGCGTTACTGTTTCAACAGAATAGTATCCACGATCCACATAA  
TCTCCCATGAATAAATAATTAGTGTGAGGACACTTTCACCAATTCGAAAAAGCTCAGCAAGATCATGGAAC  
TGACCATGAATATCACCACATATAGTCACAGGGGCTTTTACAGGGCTGCACGTTGCTCTCTTCCATTAGAATCTC  
CTTCGCTTTCTCACATAGTCTCTTACCTCCTGTTTACAGACAAGGGTTTGCACCTGCATAAGCTGAGCAATTTGTT  
CGTCAAGATTTCCATGAGATGCGCTCGATGGCACCGGATCCATAGCTGATTGATCTTCTTTTCTACTGCTTCTG  
GAGGGAAATTTGTGCAGAAACCCTAGCGGAAAAGGGGGATAAAATCAAAC

>TCONS\_00086035

GCCCCGATGAGTAGGAGGGCGCGCGGTGCTGCAAAACCTTGGGCGTGAGCCTGGGCGGAGCGGCCGTGCG  
GTGCAGATCTTGGTGGTAGTAGCAAATATTCAAATGAGAACTTTGAAGGCCGAAGAGGGGAAAGGTTCCATG  
TGAACGGCACTTGACATGGGTAGTCGATCCTAAGGGTTCGGGGGAACCCCGACAGATAGCGCGTTTCGCGC  
GTACTCCGAAAGGGAATCGGGTTAAAATTCCTGAACCGGGACGTGGCGGTTGACGGCAACGTTAGGAAGTCC  
GGAGACGTCAGCGGGGGCCTCGGGAAGAGTTATCTTTTCTGTTTAAACAGCCTGCCCACCCTGGAAACGACTC  
AGTCGGAG

>TCONS\_00086036

CGCTGACGTCTCCGGACTTCCTAACGTTGCCGTCAACCGCCACGTCCCGGTTTACAGGAATTTTAACCCGATTCC  
CTTTCGGAGTACGCGCGAAACGCGCTATCTGTGCGGGTTCCCCCGACCCTTAGGATCGACTAACCCATGTGCA  
AGTGCCGTTACATGGAACCTTTCCCCTCTTCGGCCTTCAAAGTTCTCATTTGAATATTTGCTACTACCACCAA  
GATCTGCACCGACGGCCGCTCCGCCCAGGCTCACGCCCAAGGTTTTGCAGCGACCGCC

>TCONS\_00086037

GGACCCCCGTGCCCAGCCCTCAGAGCCAATCCTTTTCCCGAAGTTACGGATCCATTTTGCCGACTTCCCTTGCC  
TACATTGTTCCATCGACCAGAGGCTGTTTACCTTGAGACCTGATGCGGTTATGAGTACGACCGGGCGTGAC  
GGCACTCGGTCTCTCCGATTTTCAAGGGCCGCCGGGGGCGCACCGGACACCACGCGACGTGCGGTGCTCTTC  
CAGCCGCTGGACCCTACCTCCGACTGAGTCGTTTCCAGGGTGGGCAGGCTGTTAAACAGAAAAGATAACTCT  
TCCCGAGGCCCCCGCGACGTCTCCGGACTTCCTAACGTTGCCGTCAACCGCCACGTCCCGGTTTACAGGAATTT  
AACCCGATTCCCTTTCGGAGTACGCGCGAAACGCGCTATCTAGTCGGGGTTCCCCCGACCCTTAGGATCGACT

AACCCATGTGCAAGTGCCGTTACATGGAACCTTTCCCCTCTTCGGCCTTCAAAGTTCTCATTGAATATTTGC  
TACTACCACCAAGATCTGCACCGACGGCCGCTCCGCCAGGCTCACGCCCAAGGTTTTGCAGCGACCGCC

>TCONS\_00086071

ATACATAAAGGAAAGACGATTAAAGAGGAAAATCCAGTTTCTTTGCCTCCCATTTCATCTTTCAAATCCGTAAA  
CCCTAATTCTCTTTTTCGACCATGAGCTACTCTAATTACGACTCCAGATATGGCGACTCAGGCTCCTATCGCCA  
GCGTCGCAGTGATCTAGTGGGTCCACCTCATATATATTCTCGGCCTATGCCTGGTGGAGCTGCGGCTAGCTAC  
GGTCGTGGTGAGCCCCTTCCTTATGGCGGTCCTCAAGCACCGCCTATGGACTCTGGTGCTAGAGGGGGTAGTG  
G

>TCONS\_00086072

CCACTACCCCTCTAGCACCAGAGTCCATAGGCGGTGCTTGAGGACCGCCATAAGGAAGGGGCTCACCACG  
ACCGTAGCTAGCCGAGCTCCACCAGGCATAGGCCGAGAATATATATGAGGTGGACCCACTAGATCACTGCG  
ACGCTGGCGATAGGAGCCTGAGTCGCCATATCTGGAGTCGTAATTAGAGTAGCTCATGGTCGCAAAAGAGAA  
TTAGGGTTTACGGATTTGAAAGATGAATGGGAGGCAAAGAACTGGATTTTCTCTTTAATCGTCTTTCTTTA  
TGTAT

>TCONS\_00086094

AATGATTACTACAAGTTAGATCAGGAACCAACTGTCTGAGATGAAGAGGAAAGTTTATTTCAGTAACCAAACA  
AACATAGGAACACAAGAAATCCAACAAGTAAGAACATAAGCTTCAGATTGTTATCTGCCTGTCCTTGGGCAG  
GCCGTGCAGCATTATGAACATTCGCCCCACGATATGCAGGAGGATATCCAAATGGGTAATTTGATGTTGCAC  
CAAATGCAGTTGGACTGGGAAATCCATGAACTGAAACTGAACAACGATGGAAACAACCCGCCAAAACC  
AGCAGACATTGTAAAGTTACCAAACTAGCAGTTGCTCCTGGAAAAATCCTCCCACGTGACCAAAACCGA  
GATTAGGAAAAGCATTGATACTGGCGGAGGAGCCGTTTCAGGTCTTTGCCCTGCTGGCCTGTTAGGAATTTT  
AACCCCAGGAATCGGTTTTGATCTGGGATCAGTTGAAGTCCGCCCTCTTCATAAAGAGGGACTAACTTCTCC  
TCTTGTACAAGGGCCTTACAAACAGGACATTCATGGGATTGTGAATGAAGCCGTAGCCATCTATAGAGACAT  
GGCCAACAATAGAGGTGGCCACAAAGTGTCACAATAGGGTCTTGTGCCAATTCAAAGCAGATGTTACATTCA  
AAATCACCAGCATCGTTGCTGCTATTTCTGAGGAAGAAGAACTCTCATATGCCCTGGTAGTTGAGTTCTGCA  
TTTACCCGATATCTCTTATTGGCACACAGATATGCACCTCACCGATTGGAAAAACGAGAATGGTGATTGCT  
TCAAACGT

>TCONS\_00086135

TCAGAGTCTAACATTTACAAAGTCAAAGCATCCATCCACATGACTTTGCTCGTTGGGTCAAGGAACCTATACC  
TTTTCTTCTCTACATTTTCCCCACCAATATTAACACTTACAGAGACCTCCCACTTAATCAACGAATAACGAA  
AACCTTCAATCAACGTCGTCAACTTCATCTTCGAAATGATTCTCCATTTCTGTGCCATTTAGGTTATTATTTACA  
AACTTAGACTGTGTCTCCTTCACAGAGCTCTCCATACTATTTACAAAAGCAAGCCGGCTGTCCGCTTTAGGGC  
TCTCACTACTATTTACAAAGCCATTAGCTGTTTGACCTGTCATTGGGATACCATCCAAACCAGTTACTTCTGG  
CCACAGTGAACCTTCGCTCCTGGGACCATTATAGAAATGACGCGATCCATAGCCACCATTAGCCATAAGATTG  
CAGTTTCCAGAGACCTCCAGCCTAGGAAGTGACTGCTGGCTATGGTCACCGTTAACACATGCCCTCCCTTGCT  
GGGTCTTGGAAGCTTGAATATAATCAAAAAGTGAATTAGATCTTTTGATCTCGCCTCAACTAAGTGAGTTGG  
AATTGCTTCTATCTCAGACTCTCCTCCAAAAGCACAGACATCGCCTACGTTAATCCCATCTGTAACAAATGAT  
TGAAAATAGATCTCCGTTTTGCCATAATGGAATCTGGGGTTTATGCATTTCAAGCTCCACTTCAGATATATA  
CATATGATGTCTTTCATCAGAACTTCTCTTTCTTCTGTGATTGTGTTCTAGTCTTGGAATAGAGACCATTTTC  
CACCTTTATGCTTTCAGGAAATACTTTACTGCTATCAGAATCTCCAACTTCACCATATATATCAATATTACCAC  
CTCGCTCTTTGCGATTTTGTCTTGAAAAATATTCCACTTCTGGATTGCATCTATGACTAATCTTGTATCAACTT  
CAATGCCTGACTCAAATGTTGTAGCCACTGCAGGAATGGTCATAACAGAATCTAGGCCAGAACACATACGTA

AAGCATATTGTATCACACAGCCAGGAGAAGAAAAACCAGCAAGTGATAATTTGATTTTAGAAAGGCTGCA  
TCTGTATATTGGTTATAGTTTTTGTAGTACTGAAACGCTGAAGCAATGGACCCAGATAGAGAGCTAAAGTTTC  
CAGTTGCAGCAGCGGCAGCACCCTTAGAGTATTTTCCAACCATTAGCTCCACTCCTTATTCGGCCAACAGT  
AGAAAGTGCCACGGGTGGGCCAGATCCACAAATGCTTTGTTGATTAAGCACTTGAGAATTCATGCTCCTGGG  
AGCTGAAGGTTTTGTCATCACCCCAGAGCCATTAGTGCAAGCACTAAAACATGCATCAGCAGTATGAAAATC  
AACTGATCCCCCTGAAGGAGATATCGCAAAAAGATGGCTAGTTCCTCTAGAAGAGCTTATCATAATCCACCG  
GCTATCACTACTAAAACCTTATGTCTTGTATGACCGCGTTAGTCAGTCCACGCTGCAGCGTATAAAGATGGACA  
TAAGAAGACCCAGATAGTCCAGGCACTATACGAAATACATTGATATTATGACCTTGAAGCTGTCACC  
AGAAGAGTAGTGCTAGGATCAAAGCACAAAGCTGAAATGGGACTCTTATGTGCCCTAAACTGTGCAACAAG  
AGCTTTGCTGACGATGTCCCTGACTATGACCTGCGGACGCACAAATGAAACA

>TCONS\_00086190

CAATTGTTCCCTATAAAGTTGCTTAACTCAGACACTCTTTTGCCGGTTGGTCCAACAGCTTGTCTTTATCAAAT  
GTCACCTCCTGTCTTTCTCAAAGTTTCTTGCATGAATCATCTTGCATTTTGTGTTGACCTCGAACTTTCTTCTTAT  
CTGATGTCCACCTGTAGCAGAATCAACGTCCATAGCTTCGTCTCTAACACACTCA

>TCONS\_00086229

CCAGGCCGCATTCTCCACTGATTGAGCTGAAGCCGGTGTTAGTTCCCCAATAACTACTACTACTACTACTAAC  
ATCTCTATGCTTCCCACAACCTTCTACCCTCAACATGGCTTCTCTTAAATCTTGTTACTTCCACATGCCAAGGTTT  
ACTTCTGGGCAAGAAGCCATTGAAATGTAGGTGTTAAGAGTTTGTGCAAGGCTAGCTAGGAGGGATTAACTT  
AGCTTGGTAAAAGAATCTTTTTTTATTACTTTTGGTTTCAATTTTCTTTGTCATTCTTGTTTTGAATTAGATTCTC  
TT

>TCONS\_00086230

CAGGCCGCATTCTCCACTGATTGAGCTGAAGCCGGTGTTAGTTCCCCAATAACTACTACTACTACTACTAACA  
TCTCTATGCTTCCCACAACCTTCTACCCTCAACATGGCTTCTCTTAAATCTTGTTACTTCCACATGCCAAGCCATT  
GAAATGTAGGTGTTAAGAGTTTGTGCAAGGCTAGCTAGGAGGGATTAACTTAGCTTGGTAAAAGAATCTTTTT  
TTATTACTTTTGGTTTCAATTTTCTTTGTCATTCTTGTTTTGAATTAGATTCTCTT

>TCONS\_00086231

CAAGCTAAGTTAATCCCTCCTAGCTAGCCTTGACACAACTCTTAACACCTACATTTCAATGGCTTCTTGCCCAG  
AAGTAAACCTTGGCATGTGGAAGTAACAAGATTTAAGAGAAGCCATGTTGAGGGTAGAAGTTGTGGGAAGC  
ATAGAGATGTTAGTAGTAGTAGTAGTATTGGGGAACCTAACACCGGCTTCAGCTGAATCAGTGGAGAAT  
GCGGCCT

>TCONS\_00086238

TGAGCTGTTGCGCCCATCTTATCATAACTCTGCTCACAGTTCATCAGATCACCGTTGAAATATTCCTGAATGAA  
GCTGACATGTCCAGACCCAGTATGAAAAAAGTTGAGTTTATCAAATCTGCCGAAGTCCACATATCCCGCGTG  
TGATCTAGACTCGACATCTTTGCAAAATCGAACCACCAAGTCAGCTTCCTTCCCCTCATACTCAAATGGATGT  
CCAATCCAGCTACTAAAATCGTGAATGTGGCTGGAGTTATCCAGTGCATAGCAACCAGTATTTGGTGCAACA  
ACTGAAACAACCCCAATTGCTTGTAACAATACAGCTGCTACTACTGTGATTAGCAAATGATACGCTACATTTT  
CAGTAGAGTAGTTTTTTGGGCTCCGCATTTCTTCGAGTACACCGCGG

>TCONS\_00086249

CGAAGTTGAACTGCTACATTAATTATATCATCCCAAGTGTCATTGGTTGGACGTAGAGTATCCAAGGAAGACC  
AAATCCTCTCTGGATCTCTTTCTTCTTTACAAAAGTCAGAATTTGCTGAGCAATTGGGCTTAGAACTGGGAAT  
ATACCATCAACAAAACCAGATCCATATTTCCATCCTCTACCCCTTAAAGAACCACATCTTTTCTTGAACTTT  
TTTGTGATCAAAGTGCTAAATCTGCCGCGTCTATCAATGAAAATGCTATCTTGCTTCCACTTCTCAATGGGAA

CATTATTGGAGTCCTTTGCTTTCCATCTGAATCCACCTTTACTGATTCTTGGTTCAAAAAGGATATGATTTAATG  
GACATCTGGAGACCAACATGAATGCAT

>TCONS\_00086260

GTGAATTCAACTTTTTGAGAGAGGCTGACGCAATGGATAGAATTCGGCGTTTTCTCTACGAAAATAACAAAA  
AGTCCCCAGTTATTGTTCCCCGGGTGCTTCGAGATATTGTCACAAGGAGGGTCCTAATGATGGAATATATTGA  
TGGAACCCCGATCCTGAAGCTGGGTGATGAAATGTCAAAGAGAGGCATAAGTCCAGATGGTAAAGTTGCAG

>TCONS\_00086310

GAACCAATTGTAGGCATGTGTAACTCCGAGACATCATTTTCTTTACATCTTCCTGGATTTGGTTTTGAATAAG  
CTTCAACTTTGGCCCCAATAGTATCACCATTGCGATCACTTGATAGTCCTGCATACGTTACGCAATACCTGCAT  
GTGTTCTTGTCTAACAATATTGTATCAAGAAATAAAGGCTCATCACCATTATGAAAGATGTGATTCGTGCT  
CTTATAAAGATCAAAATCCCATTTTTCTCCTCTTTCATGACGGCCACTAGTTATCCAGTCAACAAGAAGCACA  
CTTGAGTCTGAGACAACTTTGAACACTTGCCTCTGAGAATATTTTGCTGTGGAGAAACAGGTGACTGGATCTG  
GAATTACAGCCAAAAAGGCATTGCTTCC

>TCONS\_00086313

GTACTAAGCTTTCACAGTAACATATAGTTTATGCAGGCAGATTAGACACAATAGTATACGAGCATATGTATTT  
TGAATAAGTTGATACAACCTGACTGAAATAAAGCATCTGCCATGAAGTCATACCTCCAACCAAAAAGGTCCAGT  
TTTTATCGCCTGCACCACTTAATCTACATATATATGATGGAGGACCATTACCAGTCTTCTCAGGAGCTGGAAG  
AATGTTATCTGCAAATGACCAGCTGGATAATGAACCAGTAATATTAAGGACTGCAACCCAGACTTCCTTCAA  
GGAACCAAGGGAAAACTCCAAGTAGATCCTGCGGGAACCCCCACTCAAACCTCTCTTGTGGCTTGTTAATCGC  
CAAATGTGGGAAATGATTGTATTCAACCAAGACATCCGAACCTTTGCGCAGGAAACGTCATGCATCTTGAAAA  
CAACGAAGATATTGGAAATATCCCCATCCAATCAGCTTGGTGAGACTGTTTGACAGCAGCAAAGGATAATTC  
TGTATTAATGTGCAGTGCATTGGCCACTTCAGGGGCATGTTTGAAAACGAAAGGCAGAGAATTGGAGTCAAC  
AACAGCAAAATCATAGGTAGTTTCCATAATTTGACTGGCACCTGCACTCCTGATAGTATGCTGGAATATAACT  
CTTTTTGGTGCGTCAGTACTGTATGGAAAGAATTGTGATGAAAGGGCCAGAGCGAGAACACTGCTGTGTAGC  
AAAAAATGCATTATAGGTGACCTGGCTAACCAGTAGCTCACAACAGGCAAAAGAGGCCCAATGGACCAACT  
AGTACCAGTCCAATTATTGCTGCCACTATAACATCAGGAACAAAATACCCTGCAAAGCAAATGAGCTACCT  
ATTTATCATATTGTATAACTAAATGCTCAAATTCAATTGCAATTTTCATCAGATATCAAGGTCTTCACAAGTTCA  
CATAAAGGAAAGCTGCAACAGTCAG

>TCONS\_00086377

ATAAATTTGGATCTTTCTTGTCAACCCAAACATATGTTTCAGCCTGCAATGTCTTGGAACCTATCCATTAGGGAA  
ACATCAACAGTCGTCCTTTCATACTCAATGTCCTCAAATATGTCCAGGATATTTAATTCAGGAACAGTGATAT  
CCAAAAGAACCTTCCCAGTAACTTTCTTGTTTTCTACGGGTAGAATGGCAGGATAAACACGCCCTTTAATGCT  
AAACCTGTGGTAGTTGTGGAGAATAGCAGGATTAGAGGGAGGGACGCGTTTGAGGAGTGCATGAACGACGT  
CGTCAGCTAATAGGCTGCCATACACGAACACATTGAACACCGACTG

>TCONS\_00086384

CATTTTCTCACTTCCTCTCGAACCCTTCTCACTTTCCCACTTTCACTCGTACCAGTAGCTTTTTCCGGCGCCGCC  
ACCGTCGACGGCATTATTATTTAGATCGTTGTTAAAGTTTCAGCTTTTGGGTTTCAGCTTCGCATCTCCATTTTC  
TTTCGAATGGCGATTGACAAAATCTTCAAAGATGAAGCCACTGAAGAAAAGGGAGAGCGCGCTAGGATGG

>TCONS\_00086389

TTGTAATTCATCATCTCCATAATGTATATAGCATATATTTTCACTGTGCTTGTTTCATAATATAATCATAGTTTA  
TCGTCTGTGTCTGATCCTTGTGGTTCTATGCCACTATTTACTAATATTACTCTAATATACTGAAAATGTAGATAC  
GTATGGACACTCCATCAGGTGTTAAGGATTCCATTCTGCTTGGATCAAGTTCTCTGTACAGCCTCCTGGTGAA

ATTCCATACAATGGAATATACTATGATCCACCCGAAGAGGAGAAGTATGTATTCCAACATCCACGGCCAAAG  
AAACCAAAGTCACTGAGAATATATGAATCTCATATCGGAATGAGTAGTCCGGTGTGCATCCCTCCTCTTTTCAT  
GTAATTTTATAATTTATGAATCTGATTTTTGTTATTTCAATTCGTGTTGGACCTGTCATGACTACCATATATGTG  
AACAT

>TCONS\_00086424

TTTCTAACTTTGGGTCTTCTTGAACAGCCACCTCTTTACCTAACTCAGCTTCTTCACCGCCGCTGCTGCAGCG  
GCGCCGCCATCTCCACCACCCTCTTTTTTCTCCTTGGTGTCTCCCTCTTCACCTTTTTTGTCTCTTTCTCACCTTC  
CTCTGCTTTCTTCTCTTCATTTCTTCTTTGGGTTTTTCTCTTCTTTCTTTTCTGGTTCAACTTTTACTATAACTGC  
CCTTTTCCCTGTTCTTTTGTCTACATAATCCACCAATTGTGTTGCCTCAAATACCCCTTTTACTGTAACCTTGTA  
ATTCTTCAAGTCTGGTCTGCATTCTCCACACCTTTCATTCTTTGTATACGCCTTTTGATTTCTTGAGCACAAGCT  
TCACAATGCATGTGAACTTTCAGAACTACAATAATCACTTGGGGCGGCTCCTCTTTTTTCTCTTCGGGTTTAAC  
GACTTCTTTTTCTCCGGTTTCTTTGGCTCTTCGGCCGGCGGTTTTGGGATCGGAGAAAGAAGCTCAACTTGAC  
GGTGGCTCTTCTTTGCACTCTCTCTAAAACCTTCAACGGATCTGCTTTTTCCCTTTTACAACCACCTTATGTG  
TCTTACAATCCGTTATAACATCCTCAACTCCTTCGAAGCCTTAAGGGATTTACGGACTTTACGAGCACAGCCT  
TCACAATGCATGTAAACTCTCAACACTATTTCTTGAGGTGGCGGCGGAGGTGCTGGTGTCTTCTTTGGTTTC  
CTCTGTTTTCTTTCTTCCTTTTTTTCATTATCACCTTTTGGAGCCTCCTCTTCTCTCTCCTCTGGTTTTTTCAC  
TTCTTCTGGTTTCTTCTCTCTT

>TCONS\_00086448

AGTATCAGTGTCTCGATCGCCTCCTAACCCGAGGTGAACGAGACCGGGAAATGGAACGAGAAAGCGAGTGG  
GAACTAGAGTAAGAACGCGACGGTGAGTGTGAGCGTGAGTGAGAGCGAGTCCGCGACCATGAGCGAGACCT  
GGAACGTGAACGGTATCTACGAGAACTCCTTTCCCGGATAGGACTCCGGCTAAGTCGGTGCCTTCGAGGGGA  
ACGGCTGTAACCTTCTACTACGGCTTCGGCGACGATACCGACTTACTCGGCTTGTTTCTGCAAGCTTTTCAAGCC  
TCTGTTTCTCTTGTTCTCTTTTCTTGGCCATCTCAACAGCTGTATCTTCTTGATTGTGTTGTTCAATTGTTTGCTC  
ATTATCCGCTTAAGTCGCTCCTGAGGTGTTTCTTCTTTTACCCTGCTGTTTAGAGAGGATTGAACTGCTAGTT  
GTCTTGTTTAACTTTGATAATGCTGATGATGCACTTGCTGGTGTGTTTCAACATTTGTGCACTCTTATCCTTATCA  
ACAGATACCCAGATGCAGGATCAACATGAAGGGCCTCAAGAATACGACCAGCTGATGGCCGGTTTAAATGG  
ATCAGTTCGAGACGGAGGAGACGGTGGTGGAGAATATCCTTCAAATTTAGGCTCACTCTCATCGTCTGCGCC  
ACCAAATTCAGTGATATACTCTATTTTCGGAGCTCTCTCCTTGCCTTGGTAAATATCATCAGATTTTCTCCAC  
GTTTCATAGCGTCTTGAATGAGGAGGCGAGTATGAGAGAGACCTTGACCTGGACCTTCTGGAACGTGAATAAG  
CTTCGTATGTTGGACTCCGTCGAGACTCGCGATAGGGATCATGATGGAGAACTCTGCTCCCGGTAATGCGGGC  
TGCTTCTCTCTCCCTCTCTCTTTCTAATTGAGAAGCCTTCCTTCTTTCTTTGCGACTAAGTTTCTTATTGCAGGA  
TCTCCCTTGATTACTTCTCTTTGCCTCCTTTCTTCTCCTTTGCCTTTTTGTCCATGTAGACAAGCCATCCATACC  
TTTTCACTCCATAATCTTTGGCAATTGACTCCATCACTTCGTCGTTGCTATCATCACTGTAAAATCTTCTTCCT  
CATCATCATCCTCATCATCATCA

>TCONS\_00086449

AGTATCAGTGTCTCGATCGCCTCCTAACCCGAGGTGAACGAGACCGGGAAATGGAACGAGAAAGCGAGTGG  
GAACTAGAGTAAGAACGCGACGGTGAGTGTGAGCGTGAGTGAGAGCGAGTCCGCGACCATGAGCGAGACCT  
GGAACGTGAACGGTATCTACGAGAACTCCTTTCCCGGATAGGACTCCGGCTAAGTCGGTGCCTTCGAGGGGA  
ACGGCTGTAACCTTCTACTACGGCTTCGGCGACGATACCGACTTACTCGGCTTGTTTCTGCAAGCTTTTCAAGCC  
TCTGTTTCTCTTGTTCTCTTTTCTTGGCCATCTCAACAGCTGTATCTTCTTGATTGTGTTGTTCAATTGTTTGCTC  
ATTATCCGCTTAAGTCGCTCCTGAGGTGTTTCTTCTTTTACCCTGCTGTTTAGAGAGGATTGAACTGCTAGTT  
GTCTTGTTTAACTTTGATAATGCTGATGATGCACTTGCTGGTGTGTTTCAACATTTGTGCACTCTTATCCTTATCA

ACAGATACCCAGATGCAGGATCAACATGAAGGGCCTCAAGAATACGACCAGCTGATGGCCTGCAGAAGAA  
GTGAGATATTAAACAAGAAATGGTTTGCCTTAACAAGGAAACTGGACAGCGTCAAGTAAGTTCAATTCAGG  
GAAAATGAGCTTCAGATCGGAAGCTTGCTCCCTCTTCCCCTTGACAGTTATCTCACAGGTGTAAATTGATATA  
TTCTAAACCACATTAAGTTCTTCAGCTAACAAATGGATGATAAGCTGCAGCAGAGAAAAGACTGTCCAATCT  
AGCTTTGCAAGAATTAAGGTCAAGTGCTCCGACCGGTTTAATGGATCAGTTCGAGACGGAGGAGACGGTGG  
TGGAGAATATCCTTCAAATTTAGGCTCACTCTCATCGTCTGCGCCACCAAATTCAGTGATATACTCTATTTTCG  
GAGCTCTCTCCTTGCTTGGTAAATATCATCAGATTTTCTCCACGTTATAGCGTCTTGAATGAGGAGGCGAG  
TATGAGAGAGACCTTGACCTGGACCTTCTGGAACGTGAATAAGCTTCGTATGTTGGACTCCGTCGAGACTCGC  
GATAGGGATCATGATGGAGAACTCTGCTCCCGGTAATGCGGGCTGCTTCTCTCTCCCTCTCTCTTTCTAATTGA  
GAAGCCTTCCTTCTTTCTTTGCGACTAAGTTTCTTATTGCAGGATCTCCCTTGATTACTTCTCTTTGCTCCTTT  
CTTCCTCCTTTGCCTTTTTGTCCATGTAGACAAGCCATCCATACCTTTTCACTCCATAATCTTTGGCAATTGACT  
CCATCACTTCGTCGTTGCTATCATCACTGTTAAAATCTTCTCCTCATCATCATCCTCATCATCATCA

>TCONS\_00086506

ATTTAACTTGCTTCCAAATCTTACAATCCTCATTAGTTTGAGCTGACTATGTAGTTATGTTACCGTCTGTTCTTT  
GAAAGCTCATTATGCAATAACTTGTTTCAGCGTGCAGAAGGACCAGAAGGACAGATTGTCAGCAAATGAACT  
CATGAGGCACCTTTTCGTCACCATGTATGATGACCTGGATATTGACCTTGGACCTTACTTCACATCCGCCGGA  
CCTCCACTGGCAACACTTACTGAGCTATAATTGGTATGTTTGCCTAAGTCTTTGTTGATTCATTTTACAGCCTC  
GGTAGTTTAC

>TCONS\_00086523

AAAGTTTTTGATATTACCTGAAAGAACTTAGCCCTATGCTTTGCCATAAAAAATGGAGGGTTCCAATAGAGCAT  
AAAGCTTTTCATAGAAGTTGGGGTATTCAAGACCATGTTGTGTCATGAGAACAAACAAGCTGCTAAGAGCCA  
TCACACTGACTACCCACCAATATCATACGACCGTGTTAAAAAATCACACAACATGAGAGGATTAGACAGAT  
ACGGAATAACAACCTTGATGAAGGTTACCCAGAACCTCTTTGTAAACATCAATTGGAAGTGGTAATCTAAGGA  
ATGATATCCAGGCTTTAGTAAATTTAGTTTCATCTTTTTTGCAATATTGGCTGGAGATACCTTGATATTAGAG  
GATTCATCCTTGCAATTGCTTTCCGCTATGTCCTTT

>TCONS\_00086537

CTGTGACATAGCAACATTGACCTCGGCACTGACATGGCACTGTTGCTCCTGACAAGATATTGGCAATCTCTTT  
ACAAGCGTCCTTGCTCAACCAAAAAGCAGCATCAGCTATTTAGCTAAATTTACATTCTCCAAGTGACAGCA  
CTTCCATCCCTACATACTGACCACGTTACTCATCAAAAAGCAGGTTTTGTCCATCTCTGGATTATCAACTGCTC  
GGTTGATTTCTAAGTAGGAGTGCGCAAGATAATCTACGAATGTCC

>TCONS\_00086538

TGGCACATGAATGACAGGGATTATGGACATTTCGTAGATTATCTTGCGCACTCCTACTTAGAAATCAACCGAGC  
AGTTGATAATCCAGAGATGGACAAAACCTGCTTTTTGATGAGTAACGTGGTCAGTATGTAGGGATGGAAGTG  
CTGTCACTTGGAGAATGTAAATTTAGCTGAAATAGCTGATGCTGCTTTTTGGTTGAGCAAGGACGCTTGTA  
GAGATTGCCAATATCTTGTGAGGAGCAACAGTGCCATGTCAGTGCCGAGGTCAATGTTGCTATGTCACAGAG  
GTGGGTAAGAACAATGTGGTTTAACTTTTCTGCTGGATCCGTATAATAGTACTGCAAACATTTATCTAAATT  
ATTCTTGTTTGACTGAAGATGTGTGGCAAGACATCTATCTAACATTGTTTAGATTTTAATTGCCGACATTAATT  
TGAATTTCTAAGGCATACAAAATTCAAACATGGAAATGATAATCCATGGTTTTTTTAATTGTTAGTAACTCTTG  
TTC

>TCONS\_00086540

CCATTTCTGTGCCTGTCCATGCCATTCTCCTCCCCAAAGACGGCTTACTTTGGCCTTTACAGCTGGTGGAAAGT  
CATAGGTAAACCACTGCGGGACCTCTGCAATTATTTAGCTGATATTACTCCAGTTTCTTCACGCAATTCCTTA



ATGGCAGCAGATCTTGGGTCCTCTCCATCTTCAATGCCTCCCTGTGGCATTGTCATGCTCCAGGAACATTCAA  
TCTGGAAGCCACGAAAACCAAATGATCGTGGTTGATGAGACAAATACCAACGTTGGGACGATAACCAGAGG  
GGAGGCCCTCCATTGAAG

>TCONS\_00086656

ATGACGTCCAGCAAACCTTGGTATGTCTCCTAACATAAGGTTTCATCTCAATTTGTCTCTGCTGCTCCTTGCACGA  
TCGAGCAACAATTTTCATTCACCGTATCACTTGAATGGAGTTTCTGGAGAAGGGCAGAGAGGTGCCTAGGTTG  
CTGATTCACAACTTGAAGTGGCCAACTATCCGGTCCAGCAGTTGGCTGAGAAACACCATCTACAAATTCTGG  
GCTTCTATTAATCGCTTCTATAAAATTCTTGAAGTGATCCCCTTCACCTGGTTGCAGACGGGTAAATTCCACAT  
CAACCTGGAAATCAAGCCATGATTTGGCCATGGCCAGCAAGCAGACTGGAACAAGATAAAATTGATTTCA

>TCONS\_00086730

GGAAGAGCAAACCTTCCTTACCGCCAAATGCCTCCTTTGCTTGTGGATGCTTGCCTTGTGAGGGTGAACAAGCA  
AAGATAACTTACGATATTGCTTTTTGACTTCATCAATGGATGAATCAAATGACAGGTTAAGGTAGTCAAAAAG  
ATTCAACTTGAAGCATGAAAGGATCCTGTTAACTTCGTTATCGCGTTCAACTTCACTGACCTCAGCAAAGAAT  
TGCTTGAGAAGAGCATCTTCCACCGCGGCGGTTTTCGCCGGCGAAGGTGCGGTGGTTGTAGCGCTGTTGTCTC  
CCATTGAATCGGACTTTACGCTCCGACTGGAGATCCTAAGATGTTTTACAGTTTG

>TCONS\_00086754

ACATGGTTGAAATCCATCCAGTTTCTTGAAAAAGCTGAGTCTGGATCCTTGCAGCTGTTACCTATACATTA  
GCTCAAGCAGAAAAAGGAATGTGAACATATGACCACAACTTTAGAGAAACAATAAAATTGAAATTACG  
CATAGATATAAACTCACCGAGTTTTGGGTTTGATCAATGTGATAAACTGGGAATCCAAGAAAATACATGCCG  
GCAGATGTGACTTTACCTGTTTTTGAAGTATCTTCCTGTAATGCAAGGCTCAGTCCACCATTTTCTTCTTGGTCA  
AAGTACAATAGCTTGAATTTGCTTTTTTCTCGTGAATAAACTCGGCAGACAAGGCCCCCTTCGCTTCCTTTTC  
TGTTATGTTAACAGAGTAGAAGTGAGCAGATTGTTTTTCTACCTTTTTACACAAAGGCTGCCCAAGTGGAAGT  
GGTTGTATAGGTACTGAACCATTTAAGGCTTCCTCTAGAACAGTTGCGGAGACTGTGGTTTTTATTGGTACACC  
AAGTTTACTAAAAAGTGCAGCAAACATAGTGTTTACAGTTCCCAAACCTTGAAAGATCAAGCTCCAATTCTTG  
GCTTCTGACTCAACAGCCTCAAAACCAGCTGAGTCATATTGACGCCTTTTATCCGGATCAGATAAAATGTTA  
TATGAAAAGGTGACCTCCTT

>TCONS\_00086777

GCTATTAAATTGGGGAGCACAAATTCTGGTTATTGGATTGCAAGTGGAGAAGTACCTGTCATCCCAGCGAAC  
ATTGCTTTGGTGAAGAACTGGACGATTCACGGACTCTATTGGGGAAGCCATAAGATATATCAACCTAATGTGC  
TTGGAGATTCTCTGAAAGAGCTCCTATCCTGGTTGTCTAAGGGTTTGATTACAATCAACATTTCTCATACATTC  
AGCCT

>TCONS\_00086811

CCTTGCTTTAAAAGTTTGTACTTTTCCGTCTACACCTCTCTTTTTCTTATAGATCCACTTGCATCCAATGGGTTTA  
ACCCCATCAGCTGGTTCTACAAGATCCCAGACCTGATTAGAGTACATAGACTCCATCTCTGATTTTCATAGCAG  
CAACCCACTTATCGGCATTCTTATCATGTAGTGCTTGGTCGTAATTGACAGGTTCCGAGGTAGGCTCCTCAGG  
GATCCTATCATATGATTCTCCCAAGAGCGTATAACGAACCTGGCTGTCTTATTTCTCTCCCACTACGACTACGCA  
CTACATCAGTTGCAACTACATCACTTTGATTTTGTGGTTGAACCACAACATCATCAGGAACCTGAGTTTCCAT  
GCTATCCACAGGGATATCAACGACTTCTTCCTGTTGTGCAGTCTGCTCAACATGACTCCCACTACTTTGTGGTA  
GTATGACTTCGGGCACTTGTTCTTGTGGGACATTAAGTCTATTGACATTTCTCCCACTACTAAAGTGCAATGGT  
ATGTCAAAATCGACTTC

>TCONS\_00086870

CTCGGCTCTTCAAAGTTTCTCTGTTCTGTACTTTTCTTCCTTGCTGAAGAATCACTCTTTGAGACTTGCCTCTTAG  
TGAGATGTATATTGGAAAAAGCAAGCTCGTGCAAGTTTTGATCCTTCACTATGGTGCTTGTAGTTGGTTCATAT  
ATAATAGGTAGGTCTTGAATATGAAAATATTAATAAATCAAAAAGAGTTCTCCAGAATTGTCTGATGTGCATGA  
GGCACTTTGCGCTGTGATGGCTGAGCTTGACGGATCCCCACTAGCGATGCTACAGGAACAACCTCGTAGAGT  
CCAGGGTTCGGATCCCTTCTTGAGAAAGTTAAAAAACTCTGCATGTACTGTGCAGAATGGCGGATAGGCCGT  
CCGAGGACATAGCCAATAAATCAGCTTTATGGTCTATTACTGAATGGAATATTCCTACACCCTGCATGCAAA  
TTTGTTTAACTTTTGTGAGTGTAACTTGAACCTCCGTAATGCACGACATCTTCCTGACTCTGATCCCACTCAGTT  
GAAAAGGATATCTTGTCCAGTAATGGGCTAGAAGCCGATTATTTACTCGA

>TCONS\_00086873

GAGTATTTTGGTCCCTTTTAAGCAAATCAGAGAAATTTTATCTAGAGTCCTCAGCAACATGACACAAGAGACA  
CACAAGACCTGTTGCACCAGCAACCTGCTTCCAATTTCTGGGTGCCTGCACCAAAGCAGCCCCTGCTACTAC  
ACCAGCAGTCAAAACATTAACCCAATCATTTCTGTTCTATATCTCTGAAGCCCACAGCGAGTGGAAGAAAA  
TATTGCAGCAAAGAGTCCTATAAAGAAAGATGGATGCTTATCAGATGATAATGACATATCTAAAC

>TCONS\_00086968

GAGGAGGGAGTGAGAGCATAGCACAAACCAACTGAACGAATGAATTAGAGAAGAGAAGACAACGTCCGTT  
CCTCCAAGCAAAGGAGTCATATCAAATTTAGAGTTCTTCTCGAAACATCTATTCACAGACTTCGTAAGAATAA  
GTATTATCTGACCATAGAGGAGCTCTAGTTGTACCCTCAATGACTGATATGACTCTTCTGTACAGCTTATGCAA  
ACCAAGTAAATAGGTCCTTTTACAAGAAATACAACCTGGTGTTCCTCGGCTCTGACCAAGTTGACTCGATCAC  
CCCTGAAAAAGACACCAATCAGGCAAACCTTCAATATCCCGCTATGACTTCGCCATTCTCCACAAATGAAATG  
ATGGCCTGCAAAGTGGCAGAGAATCCAGCAAGCTTGATTTCATCTCCATATCTTCAAGTGAAATAAAAAAGA  
AAAATAAGAAATCCCAGAGAAAATTATATATGATGAAGAAGAAGTAGTTCAATAGTATATAGTACTCTAATT  
AAT

>TCONS\_00086969

GAGGAGGGAGTGAGAGCATAGCACAAACCAACTGAACGAATGAATTAGAGAAGAGAAGACAACGTCCGTT  
CCTCCAAGCAAAGGAGTCATATCAAATTTAGAGTTCTTCTCGAAACATCTATTCACAGACTTCGTAAGAATAA  
GTATTATCTGACCATAGAGGAGCTCTAGTTGTACCCTCAATGACTGATATGACTCTTCTGTACAGCTTATGCAA  
ACCAAGTAAATAGGTCCTTTTACAAGAAATACAACCTGGTGTTCCTCGGCTCTGACCAAGTTGACTCGATCAC  
CCCCATTCTCCACAAATGAAATGATGGCCTGCAAAGTGGCAGAGAATCCAGCAAGCTTGATTTCATCTCCAT  
ATCTTCAAGTGAAATAAAAAAGAAAAATAAGAAATCCCAGAGAAAATTATATATGATGAAGAAGAAGTAGT  
TCAATAGTATATAGTACTCTAATTAAT

>TCONS\_00087044

CCTGTGTGTCAATGCCCGGAAAAGAAGTTTCATACTAACGGACCTAGAATTATTGACTGTTGAAGGAGGTGT  
AAAGCAGAGCCACTGAATTACTAAAGCTTTCTGAAGGCTCTGTAATCGATGCTGCTCTGCAACATCTGTTTCA  
TTATCATATTTCCCAACTCTGATTTCTGGAGACCTTGAAAGAACCCTTTCGATGATCTCCTCAAACTGCCCTT  
TGAATCATCTTCTGGAGCAAATGGCAAGTATTCAATAGCAGAAAGGAATATTTTATACCTGACGTGAACGCT  
G

>TCONS\_00087103

TTCTGTCTGAATATCGTATGCTGGTAATGTCCTTTCATCTTTAGCCAAAATTTGGTTTGCTTCCTATTGCATAAC  
GGGGTATATTATTGACCTGAATTCTCTCTCTTTTTTTCTTTTTTCTTTTAAACATTTGCAGCACGATCTGTCCCTG  
GTGTGTACACGCTTGCTGTGTCTGAGGCACTTCCGGAAGATTTGAAGAATCTATGTCAAGATGAACGTATCCC  
ATATAATCCTCCAAAACGCATCTGAATGGACAAATCAGCAGT

>TCONS\_00087105

ACTGCTGATTTGTCCATTCAGATGCGTTTTGGAGGATTATATGGGATACGTTTCATCTTGACATAGATTCTTCAA  
ATCTTCCGGAAGTGCCTCAGACACAGCAAGCGTGTAACAACCAGGGACAGATCGTGCTGCAAATGTTTAAAA  
GAAAAAAGAAAAAAGAGAGAGAATTCAGGTCAATAATATACCCCGTTATGCAATAGGAAGCAAACCAA  
>TCONS\_00087133

CAAGTCTTCAACTCTGAAGGGTTCAACGGAAGAAAAAGGCAAGACGAGGTAAGAGAGGTTGAGACGAGAG  
TGATAGAGGTGAGCGAATAGCGCAGCAAAAGCTCCGGAATAATGAAGGATAATTGTAGAGGATGAGGTTTGG  
CATTTTGTCTTCCGACGCTTTAGCCAACGCTTTCAATGCTGCTTGTGACCTGAAGCACCGAATTAACGGCGAC  
>TCONS\_00087175

TGTTAGCGTATAGATTGTTTTAGTTGCGATGAGTTCAGGAAATGTGGGGCGGCTGCCATTGATGAATGTTGTTA  
AATTTAAAGGAGTGCCAATTCTGCAGCAATTGCATTTGGAGGAACGGTTGCTCAGGACTTCACCTCAAACT  
GGTGCATTGTAAATGATGGAACCAATGAACCCACAATTGTCATGGGTATTTTCAGGAAAACCAGCTGAACTTT  
TTGAAATCGGTTCTGTTTTGCAAGACAAGATTCCAGTAGTAAAG  
>TCONS\_00087177

CCTCCAGTAAACCTCTTTACTACTGGAATCTTGTCTGAAATACCCATGACAATTGTGGGTTTCATTGGTTCCAT  
CATTTACAATGCACCAGTTTTGAGGTGAAGTCCTGAGCAACCGTTCCTCCAAATGCAATTGCTGCAGAATTGG  
CACTCCTTTAAATTTAACAACATTCATCAATGGCAGCCGCCCCACATTCCTGAACTCATCGCAACTAAAACA  
ATCTATACGCTAACAGCTGAA  
>TCONS\_00087178

TGCCTCCTCCAGTAAACCTCTTTACTACTGGAATCTTGTCTTGCAAAACAGAACCGATTTCAAAAAGTTCAGC  
TGGTTTTCTGAAATACCCATGACAATTGTGGGTTTCATTGGTTCCATCATTTACAATGCACCAGTTTTGAGGTG  
AAGTCCTGAGCAACCGTTCCTCCAAATGCAATTGCTGCAGAATTGGCACTCCTTTAAATTTAACAACATTCAT  
CAATGGCAGCCGCCCCACATTCCTGAACTCATCGCAACTAAAACAATCTATACGCTAACAGCTGAA  
>TCONS\_00087702

GTACGACTAGCCAAACTCTTAGATGACATCATAATTCAGCCTCAACTAGATATTACTATTGGACATTGAACT  
GTTGAGTCCATAAACAAGAGTTTATTAGAAAGACACAAAACAAGTGATAAATCTTGGACGCACCTCTGCATG  
GTCCGCGCCTGTACCTAGACCCAATTGGCCAAACTGATTTCCCCCAAAAGTATACACACGGCCATGATCACA  
TAAGCACACAGAATGCCATAGTCCACCTGCCACGGCTTCTATTCTAGTGTTCAATAGAGAAGAGACACAAGT  
TGGCCTCAGCACGTCGTTTGTATTACCTAGTCCACACTGCCCATACAATCCCCAGCCAAATGTAAGCAGCACC  
CCAGCATCTGTGATTACTGCACTATGCCGGCCACCACAAGCAATTCTCT
